# Supplementary material for: The miR-34a-5p promotes the multi-chemoresistance of osteosarcoma via repression of the AGTR1 gene
Source: PubMed Central journal article supplement (PMC5223322; doi:10.1186/s12885-016-3002-x), 2017-01-10
Supplement: 12885_2016_3002_MOESM2_ESM.pdf [file 12885_2016_3002_MOESM2_ESM.pdf]

|    | miR_name         | SJSA-1 | G-292 | G292/SJSA |
|----|------------------|--------|-------|-----------|
| 1  | hsa-miR-138-5p   | 2      | 1135  | 567.50    |
| 2  | hsa-miR-708-5p   | 3      | 1395  | 465.00    |
| 3  | hsa-miR-296-5p   | 2      | 512   | 256.00    |
| 4  | hsa-miR-139-3p   | 1      | 213   | 213.00    |
| 5  | hsa-miR-378a-3p  | 61     | 7359  | 120.64    |
| 6  | hsa-miR-708-3p   | 1      | 120   | 120.00    |
| 7  | hsa-miR-18a-5p   | 1      | 102   | 102.00    |
| 8  | hsa-miR-9-5p     | 1      | 88    | 88.00     |
| 9  | hsa-miR-935      | 5      | 426   | 85.20     |
| 10 | hsa-miR-129-2-3p | 3      | 239   | 79.67     |
| 11 | hsa-miR-4745-5p  | 1      | 69    | 69.00     |
| 12 | hsa-miR-340-5p   | 9      | 605   | 67.22     |
| 13 | hsa-miR-378c     | 4      | 244   | 61.00     |
| 14 | hsa-miR-7111-5p  | 2      | 98    | 49.00     |
| 15 | hsa-miR-1180-3p  | 2      | 94    | 47.00     |
| 16 | hsa-miR-129-5p   | 2      | 87    | 43.50     |
| 17 | hsa-miR-183-3p   | 1      | 43    | 43.00     |
| 18 | hsa-miR-31-3p    | 1      | 35    | 35.00     |
| 19 | hsa-miR-100-3p   | 1      | 33    | 33.00     |
| 20 | hsa-miR-148a-3p  | 6      | 188   | 31.33     |
| 21 | hsa-miR-92a-1-5p | 322    | 9929  | 30.84     |
| 22 | hsa-miR-139-5p   | 1      | 30    | 30.00     |
| 23 | hsa-miR-9-3p     | 3      | 86    | 28.67     |
| 24 | hsa-miR-6799-5p  | 1      | 27    | 27.00     |
| 25 | hsa-miR-1910-3p  | 3      | 79    | 26.33     |
| 26 | hsa-miR-363-5p   | 1      | 26    | 26.00     |
| 27 | hsa-miR-2355-5p  | 1      | 24    | 24.00     |
| 28 | hsa-miR-5088-5p  | 1      | 24    | 24.00     |
| 29 | hsa-miR-4706     | 1      | 23    | 23.00     |
| 30 | hsa-miR-17-3p    | 31     | 666   | 21.48     |
| 31 | hsa-miR-1275     | 8      | 159   | 19.88     |
| 32 | hsa-miR-5001-5p  | 2      | 39    | 19.50     |
| 33 | hsa-miR-365b-5p  | 92     | 1750  | 19.02     |
| 34 | hsa-miR-3200-5p  | 1      | 19    | 19.00     |
| 35 | hsa-miR-345-5p   | 1      | 19    | 19.00     |
| 36 | hsa-miR-589-3p   | 2      | 37    | 18.50     |
| 37 | hsa-miR-598-3p   | 54     | 987   | 18.28     |
| 38 | hsa-miR-1260b    | 2      | 36    | 18.00     |
| 39 | hsa-miR-6720-3p  | 3      | 53    | 17.67     |
| 40 | hsa-miR-1304-5p  | 3      | 52    | 17.33     |
| 41 | hsa-miR-942-5p   | 5      | 77    | 15.40     |

|    |                   |     |      |       |
|----|-------------------|-----|------|-------|
| 42 | hsa-miR-6871-5p   | 1   | 15   | 15.00 |
| 43 | hsa-miR-92a-3p    | 488 | 7259 | 14.88 |
| 44 | hsa-miR-4741      | 7   | 104  | 14.86 |
| 45 | hsa-miR-19b-3p    | 19  | 279  | 14.68 |
| 46 | hsa-miR-3679-5p   | 4   | 58   | 14.50 |
| 47 | hsa-miR-7-1-3p    | 3   | 42   | 14.00 |
| 48 | hsa-miR-6862-5p   | 1   | 14   | 14.00 |
| 49 | hsa-miR-3151-5p   | 1   | 14   | 14.00 |
| 50 | hsa-miR-101-3p    | 509 | 6937 | 13.63 |
| 51 | hsa-miR-1         | 53  | 700  | 13.21 |
| 52 | hsa-miR-210-5p    | 1   | 13   | 13.00 |
| 53 | hsa-miR-4458      | 1   | 13   | 13.00 |
| 54 | hsa-miR-760       | 14  | 179  | 12.79 |
| 55 | hsa-miR-17-5p     | 124 | 1576 | 12.71 |
| 56 | hsa-miR-193a-3p   | 15  | 190  | 12.67 |
| 57 | hsa-miR-4425      | 8   | 101  | 12.63 |
| 58 | hsa-miR-421       | 12  | 151  | 12.58 |
| 59 | hsa-miR-6805-5p   | 9   | 113  | 12.56 |
| 60 | hsa-miR-941       | 25  | 312  | 12.48 |
| 61 | hsa-miR-29a-5p    | 6   | 72   | 12.00 |
| 62 | hsa-miR-8072      | 4   | 48   | 12.00 |
| 63 | hsa-miR-10a-3p    | 3   | 36   | 12.00 |
| 64 | hsa-miR-3183      | 1   | 12   | 12.00 |
| 65 | hsa-miR-106a-5p   | 1   | 12   | 12.00 |
| 66 | hsa-miR-6777-5p   | 3   | 35   | 11.67 |
| 67 | hsa-miR-1268a     | 303 | 3514 | 11.60 |
| 68 | hsa-miR-125b-1-3p | 4   | 46   | 11.50 |
| 69 | hsa-miR-652-3p    | 3   | 33   | 11.00 |
| 70 | hsa-miR-6812-5p   | 1   | 11   | 11.00 |
| 71 | hsa-miR-548a-3p   | 1   | 11   | 11.00 |
| 72 | hsa-miR-6876-5p   | 1   | 11   | 11.00 |
| 73 | hsa-miR-6832-5p   | 1   | 11   | 11.00 |
| 74 | hsa-miR-1268b     | 342 | 3743 | 10.94 |
| 75 | hsa-miR-877-5p    | 457 | 4903 | 10.73 |
| 76 | hsa-miR-20a-5p    | 68  | 714  | 10.50 |
| 77 | hsa-miR-95-3p     | 2   | 21   | 10.50 |
| 78 | hsa-miR-589-5p    | 11  | 114  | 10.36 |
| 79 | hsa-miR-19a-3p    | 4   | 41   | 10.25 |
| 80 | hsa-miR-1301-3p   | 24  | 243  | 10.13 |
| 81 | hsa-miR-92a-2-5p  | 3   | 30   | 10.00 |
| 82 | hsa-miR-590-5p    | 2   | 20   | 10.00 |
| 83 | hsa-miR-885-3p    | 1   | 10   | 10.00 |
| 84 | hsa-miR-20b-3p    | 5   | 48   | 9.60  |

|     |                   |      |      |      |
|-----|-------------------|------|------|------|
| 85  | hsa-miR-4707-3p   | 6    | 56   | 9.33 |
| 86  | hsa-miR-6747-5p   | 2    | 18   | 9.00 |
| 87  | hsa-miR-212-5p    | 1    | 9    | 9.00 |
| 88  | hsa-miR-6858-5p   | 1    | 9    | 9.00 |
| 89  | hsa-miR-3187-3p   | 1    | 9    | 9.00 |
| 90  | hsa-miR-3173-3p   | 3    | 26   | 8.67 |
| 91  | hsa-miR-625-5p    | 11   | 95   | 8.64 |
| 92  | hsa-miR-196b-5p   | 47   | 402  | 8.55 |
| 93  | hsa-miR-3138      | 11   | 92   | 8.36 |
| 94  | hsa-miR-193a-5p   | 50   | 416  | 8.32 |
| 95  | hsa-miR-210-3p    | 32   | 256  | 8.00 |
| 96  | hsa-miR-6890-5p   | 1    | 8    | 8.00 |
| 97  | hsa-miR-4748      | 1    | 8    | 8.00 |
| 98  | hsa-miR-769-5p    | 1    | 8    | 8.00 |
| 99  | hsa-miR-342-3p    | 183  | 1414 | 7.73 |
| 100 | hsa-miR-6735-5p   | 3    | 23   | 7.67 |
| 101 | hsa-miR-339-3p    | 21   | 160  | 7.62 |
| 102 | hsa-miR-1246      | 3    | 22   | 7.33 |
| 103 | hsa-miR-324-5p    | 10   | 73   | 7.30 |
| 104 | hsa-miR-29b-3p    | 309  | 2182 | 7.06 |
| 105 | hsa-miR-100-5p    | 546  | 3845 | 7.04 |
| 106 | hsa-miR-219a-1-3p | 1    | 7    | 7.00 |
| 107 | hsa-miR-4469      | 1    | 7    | 7.00 |
| 108 | hsa-miR-6865-5p   | 1    | 7    | 7.00 |
| 109 | hsa-miR-548aa     | 1    | 7    | 7.00 |
| 110 | hsa-miR-548t-3p   | 1    | 7    | 7.00 |
| 111 | hsa-miR-4477b     | 1    | 7    | 7.00 |
| 112 | hsa-miR-31-5p     | 1328 | 9228 | 6.95 |
| 113 | hsa-miR-5187-5p   | 7    | 48   | 6.86 |
| 114 | hsa-miR-342-5p    | 19   | 130  | 6.84 |
| 115 | hsa-miR-455-3p    | 21   | 140  | 6.67 |
| 116 | hsa-miR-641       | 5    | 33   | 6.60 |
| 117 | hsa-miR-629-5p    | 22   | 144  | 6.55 |
| 118 | hsa-miR-149-3p    | 18   | 117  | 6.50 |
| 119 | hsa-miR-449c-5p   | 31   | 199  | 6.42 |
| 120 | hsa-miR-301a-3p   | 13   | 83   | 6.38 |
| 121 | hsa-miR-363-3p    | 8    | 51   | 6.38 |
| 122 | hsa-miR-301a-5p   | 57   | 363  | 6.37 |
| 123 | hsa-miR-29b-1-5p  | 11   | 70   | 6.36 |
| 124 | hsa-miR-324-3p    | 3    | 19   | 6.33 |
| 125 | hsa-miR-3175      | 2    | 12   | 6.00 |
| 126 | hsa-miR-6880-5p   | 2    | 12   | 6.00 |
| 127 | hsa-miR-6767-5p   | 1    | 6    | 6.00 |

|     |                  |     |      |      |
|-----|------------------|-----|------|------|
| 128 | hsa-miR-4722-5p  | 1   | 6    | 6.00 |
| 129 | hsa-miR-330-3p   | 615 | 3677 | 5.98 |
| 130 | hsa-miR-499a-5p  | 12  | 71   | 5.92 |
| 131 | hsa-miR-4485     | 6   | 35   | 5.83 |
| 132 | hsa-miR-339-5p   | 21  | 122  | 5.81 |
| 133 | hsa-miR-3615     | 9   | 52   | 5.78 |
| 134 | hsa-miR-942-3p   | 3   | 17   | 5.67 |
| 135 | hsa-miR-449a     | 5   | 28   | 5.60 |
| 136 | hsa-miR-455-5p   | 12  | 67   | 5.58 |
| 137 | hsa-miR-132-5p   | 2   | 11   | 5.50 |
| 138 | hsa-miR-940      | 7   | 38   | 5.43 |
| 139 | hsa-miR-500a-3p  | 3   | 16   | 5.33 |
| 140 | hsa-miR-153-3p   | 3   | 16   | 5.33 |
| 141 | hsa-miR-3654     | 3   | 16   | 5.33 |
| 142 | hsa-miR-222-5p   | 28  | 148  | 5.29 |
| 143 | hsa-miR-3935     | 5   | 26   | 5.20 |
| 144 | hsa-miR-1254     | 10  | 51   | 5.10 |
| 145 | hsa-miR-664b-5p  | 10  | 51   | 5.10 |
| 146 | hsa-miR-1293     | 4   | 20   | 5.00 |
| 147 | hsa-miR-664a-3p  | 2   | 10   | 5.00 |
| 148 | hsa-miR-196b-3p  | 4   | 19   | 4.75 |
| 149 | hsa-miR-6852-5p  | 3   | 14   | 4.67 |
| 150 | hsa-miR-191-3p   | 3   | 14   | 4.67 |
| 151 | hsa-miR-125b-5p  | 362 | 1677 | 4.63 |
| 152 | hsa-miR-1292-5p  | 16  | 74   | 4.63 |
| 153 | hsa-miR-3154     | 8   | 37   | 4.63 |
| 154 | hsa-miR-425-3p   | 13  | 60   | 4.62 |
| 155 | hsa-miR-7-5p     | 49  | 224  | 4.57 |
| 156 | hsa-miR-548j-5p  | 11  | 50   | 4.55 |
| 157 | hsa-miR-766-5p   | 24  | 109  | 4.54 |
| 158 | hsa-miR-30c-1-3p | 8   | 36   | 4.50 |
| 159 | hsa-miR-4466     | 4   | 18   | 4.50 |
| 160 | hsa-miR-449b-5p  | 2   | 9    | 4.50 |
| 161 | hsa-miR-4734     | 2   | 9    | 4.50 |
| 162 | hsa-miR-3661     | 2   | 9    | 4.50 |
| 163 | hsa-miR-33a-5p   | 146 | 651  | 4.46 |
| 164 | hsa-miR-197-5p   | 60  | 263  | 4.38 |
| 165 | hsa-miR-769-3p   | 6   | 26   | 4.33 |
| 166 | hsa-miR-625-3p   | 23  | 98   | 4.26 |
| 167 | hsa-miR-3064-5p  | 4   | 17   | 4.25 |
| 168 | hsa-miR-3141     | 9   | 38   | 4.22 |
| 169 | hsa-miR-5010-5p  | 62  | 260  | 4.19 |
| 170 | hsa-miR-106b-5p  | 263 | 1082 | 4.11 |

|     |                  |       |       |      |
|-----|------------------|-------|-------|------|
| 171 | hsa-miR-505-5p   | 76    | 310   | 4.08 |
| 172 | hsa-miR-374b-3p  | 16    | 65    | 4.06 |
| 173 | hsa-miR-4521     | 77    | 310   | 4.03 |
| 174 | hsa-miR-497-5p   | 10    | 40    | 4.00 |
| 175 | hsa-miR-301b     | 4     | 16    | 4.00 |
| 176 | hsa-miR-2355-3p  | 3     | 12    | 4.00 |
| 177 | hsa-miR-6875-5p  | 2     | 8     | 4.00 |
| 178 | hsa-miR-624-5p   | 2     | 8     | 4.00 |
| 179 | hsa-miR-3928-3p  | 12    | 46    | 3.83 |
| 180 | hsa-miR-25-5p    | 2242  | 8525  | 3.80 |
| 181 | hsa-miR-93-5p    | 552   | 2076  | 3.76 |
| 182 | hsa-miR-6511b-5p | 8     | 30    | 3.75 |
| 183 | hsa-miR-3193     | 4     | 15    | 3.75 |
| 184 | hsa-miR-3143     | 4     | 15    | 3.75 |
| 185 | hsa-miR-3140-3p  | 3     | 11    | 3.67 |
| 186 | hsa-miR-221-5p   | 1272  | 4639  | 3.65 |
| 187 | hsa-miR-183-5p   | 32    | 116   | 3.63 |
| 188 | hsa-miR-6511a-5p | 8     | 29    | 3.63 |
| 189 | hsa-miR-3127-5p  | 5     | 18    | 3.60 |
| 190 | hsa-miR-766-3p   | 5     | 18    | 3.60 |
| 191 | hsa-miR-1307-3p  | 794   | 2826  | 3.56 |
| 192 | hsa-miR-146b-5p  | 98    | 343   | 3.50 |
| 193 | hsa-miR-203a     | 4     | 14    | 3.50 |
| 194 | hsa-miR-3177-3p  | 2     | 7     | 3.50 |
| 195 | hsa-miR-548n     | 2     | 7     | 3.50 |
| 196 | hsa-miR-671-3p   | 2     | 7     | 3.50 |
| 197 | hsa-miR-3934-5p  | 9     | 31    | 3.44 |
| 198 | hsa-miR-96-5p    | 22    | 75    | 3.41 |
| 199 | hsa-miR-10a-5p   | 1511  | 5094  | 3.37 |
| 200 | hsa-miR-1262     | 27    | 91    | 3.37 |
| 201 | hsa-miR-29a-3p   | 32565 | 1E+05 | 3.33 |
| 202 | hsa-miR-590-3p   | 6     | 20    | 3.33 |
| 203 | hsa-miR-3163     | 3     | 10    | 3.33 |
| 204 | hsa-miR-148b-3p  | 59    | 195   | 3.31 |
| 205 | hsa-miR-629-3p   | 4     | 13    | 3.25 |
| 206 | hsa-miR-502-3p   | 5     | 16    | 3.20 |
| 207 | hsa-miR-548l     | 5     | 16    | 3.20 |
| 208 | hsa-miR-1271-5p  | 21    | 67    | 3.19 |
| 209 | hsa-miR-484      | 23    | 73    | 3.17 |
| 210 | hsa-miR-374b-5p  | 129   | 409   | 3.17 |
| 211 | hsa-miR-3129-5p  | 18    | 57    | 3.17 |
| 212 | hsa-miR-362-3p   | 6     | 19    | 3.17 |
| 213 | hsa-miR-1307-5p  | 224   | 699   | 3.12 |

|     |                   |       |       |      |
|-----|-------------------|-------|-------|------|
| 214 | hsa-miR-186-5p    | 109   | 334   | 3.06 |
| 215 | hsa-miR-27a-3p    | 1039  | 3182  | 3.06 |
| 216 | hsa-miR-21-3p     | 149   | 454   | 3.05 |
| 217 | hsa-miR-6721-5p   | 32    | 97    | 3.03 |
| 218 | hsa-miR-584-5p    | 345   | 1045  | 3.03 |
| 219 | hsa-miR-6825-5p   | 12    | 36    | 3.00 |
| 220 | hsa-miR-103a-2-5p | 3     | 9     | 3.00 |
| 221 | hsa-miR-4667-5p   | 2     | 6     | 3.00 |
| 222 | hsa-miR-6779-5p   | 2     | 6     | 3.00 |
| 223 | hsa-miR-5585-3p   | 2     | 6     | 3.00 |
| 224 | hsa-miR-16-1-3p   | 2     | 6     | 3.00 |
| 225 | hsa-miR-30e-5p    | 117   | 340   | 2.91 |
| 226 | hsa-miR-24-3p     | 3920  | 11386 | 2.90 |
| 227 | hsa-miR-222-3p    | 9136  | 26485 | 2.90 |
| 228 | hsa-miR-1285-3p   | 18    | 52    | 2.89 |
| 229 | hsa-miR-15b-3p    | 18    | 51    | 2.83 |
| 230 | hsa-miR-221-3p    | 17810 | 50035 | 2.81 |
| 231 | hsa-miR-1277-5p   | 5     | 14    | 2.80 |
| 232 | hsa-miR-887-3p    | 9     | 25    | 2.78 |
| 233 | hsa-miR-194-5p    | 9     | 25    | 2.78 |
| 234 | hsa-miR-4750-5p   | 4     | 11    | 2.75 |
| 235 | hsa-miR-6730-5p   | 4     | 11    | 2.75 |
| 236 | hsa-miR-3605-5p   | 22    | 60    | 2.73 |
| 237 | hsa-miR-125a-3p   | 14    | 38    | 2.71 |
| 238 | hsa-miR-3130-3p   | 7     | 19    | 2.71 |
| 239 | hsa-miR-3190-3p   | 6     | 16    | 2.67 |
| 240 | hsa-miR-106b-3p   | 189   | 503   | 2.66 |
| 241 | hsa-miR-192-5p    | 640   | 1674  | 2.62 |
| 242 | hsa-miR-151a-3p   | 263   | 683   | 2.60 |
| 243 | hsa-miR-15b-5p    | 357   | 918   | 2.57 |
| 244 | hsa-miR-5090      | 9     | 23    | 2.56 |
| 245 | hsa-miR-3192-5p   | 31    | 79    | 2.55 |
| 246 | hsa-miR-25-3p     | 5897  | 15010 | 2.55 |
| 247 | hsa-miR-532-3p    | 25    | 63    | 2.52 |
| 248 | hsa-miR-30e-3p    | 27    | 68    | 2.52 |
| 249 | hsa-miR-32-5p     | 17    | 42    | 2.47 |
| 250 | hsa-miR-320d      | 6     | 14    | 2.33 |
| 251 | hsa-miR-195-5p    | 14    | 32    | 2.29 |
| 252 | hsa-miR-660-5p    | 14    | 32    | 2.29 |
| 253 | hsa-miR-103a-3p   | 41833 | 95214 | 2.28 |
| 254 | hsa-miR-30b-3p    | 75    | 169   | 2.25 |
| 255 | hsa-miR-24-2-5p   | 20    | 45    | 2.25 |
| 256 | hsa-miR-505-3p    | 4     | 9     | 2.25 |

|     |                  |        |       |      |
|-----|------------------|--------|-------|------|
| 257 | hsa-miR-1306-3p  | 21     | 47    | 2.24 |
| 258 | hsa-miR-7845-5p  | 5      | 11    | 2.20 |
| 259 | hsa-miR-23a-3p   | 3519   | 7721  | 2.19 |
| 260 | hsa-miR-128-3p   | 1979   | 4276  | 2.16 |
| 261 | hsa-miR-182-5p   | 111    | 236   | 2.13 |
| 262 | hsa-miR-181d-5p  | 744    | 1581  | 2.13 |
| 263 | hsa-miR-320a     | 129750 | 3E+05 | 2.11 |
| 264 | hsa-miR-29c-3p   | 310    | 644   | 2.08 |
| 265 | hsa-miR-26b-5p   | 1966   | 4041  | 2.06 |
| 266 | hsa-miR-1255a    | 57     | 117   | 2.05 |
| 267 | hsa-miR-361-5p   | 39     | 80    | 2.05 |
| 268 | hsa-miR-151a-5p  | 202    | 414   | 2.05 |
| 269 | hsa-miR-197-3p   | 24     | 49    | 2.04 |
| 270 | hsa-miR-483-5p   | 1631   | 3313  | 2.03 |
| 271 | hsa-miR-320c     | 123    | 249   | 2.02 |
| 272 | hsa-miR-6785-5p  | 10     | 20    | 2.00 |
| 273 | hsa-miR-1306-5p  | 7      | 14    | 2.00 |
| 274 | hsa-miR-148b-5p  | 7      | 14    | 2.00 |
| 275 | hsa-miR-628-5p   | 7      | 14    | 2.00 |
| 276 | hsa-miR-204-3p   | 6      | 12    | 2.00 |
| 277 | hsa-miR-671-5p   | 4      | 8     | 2.00 |
| 278 | hsa-miR-23a-5p   | 275    | 541   | 1.97 |
| 279 | hsa-miR-196a-5p  | 1492   | 2884  | 1.93 |
| 280 | hsa-miR-6087     | 349    | 673   | 1.93 |
| 281 | hsa-miR-107      | 21324  | 40909 | 1.92 |
| 282 | hsa-miR-130a-3p  | 721    | 1376  | 1.91 |
| 283 | hsa-miR-628-3p   | 16     | 29    | 1.81 |
| 284 | hsa-miR-425-5p   | 38     | 68    | 1.79 |
| 285 | hsa-miR-219b-3p  | 4      | 7     | 1.75 |
| 286 | hsa-miR-4454     | 4      | 7     | 1.75 |
| 287 | hsa-miR-132-3p   | 2482   | 4320  | 1.74 |
| 288 | hsa-miR-548h-5p  | 34     | 57    | 1.68 |
| 289 | hsa-miR-181c-3p  | 9      | 15    | 1.67 |
| 290 | hsa-miR-27a-5p   | 20     | 33    | 1.65 |
| 291 | hsa-miR-320b     | 1002   | 1646  | 1.64 |
| 292 | hsa-miR-1277-3p  | 11     | 18    | 1.64 |
| 293 | hsa-miR-744-5p   | 989    | 1606  | 1.62 |
| 294 | hsa-miR-30c-2-3p | 111    | 180   | 1.62 |
| 295 | hsa-miR-374a-3p  | 165    | 267   | 1.62 |
| 296 | hsa-miR-4687-3p  | 5      | 8     | 1.60 |
| 297 | hsa-miR-1273c    | 5      | 8     | 1.60 |
| 298 | hsa-miR-155-5p   | 1411   | 2253  | 1.60 |
| 299 | hsa-miR-185-5p   | 8000   | 12173 | 1.52 |

|     |                  |        |       |      |
|-----|------------------|--------|-------|------|
| 300 | hsa-miR-619-5p   | 8      | 12    | 1.50 |
| 301 | hsa-miR-3164     | 4      | 6     | 1.50 |
| 302 | hsa-let-7a-3p    | 23     | 34    | 1.48 |
| 303 | hsa-miR-548k     | 19     | 28    | 1.47 |
| 304 | hsa-miR-181c-5p  | 72     | 105   | 1.46 |
| 305 | hsa-miR-99b-5p   | 850    | 1225  | 1.44 |
| 306 | hsa-miR-99a-5p   | 56     | 80    | 1.43 |
| 307 | hsa-miR-4286     | 10     | 14    | 1.40 |
| 308 | hsa-miR-30d-5p   | 3205   | 4451  | 1.39 |
| 309 | hsa-miR-2110     | 65     | 90    | 1.38 |
| 310 | hsa-miR-16-5p    | 2175   | 3000  | 1.38 |
| 311 | hsa-miR-30b-5p   | 17     | 23    | 1.35 |
| 312 | hsa-miR-15a-5p   | 238    | 318   | 1.34 |
| 313 | hsa-miR-6734-5p  | 23     | 30    | 1.30 |
| 314 | hsa-miR-16-2-3p  | 47     | 60    | 1.28 |
| 315 | hsa-miR-27b-3p   | 226    | 279   | 1.23 |
| 316 | hsa-miR-21-5p    | 37038  | 45700 | 1.23 |
| 317 | hsa-miR-423-3p   | 390    | 472   | 1.21 |
| 318 | hsa-miR-331-3p   | 200    | 239   | 1.20 |
| 319 | hsa-miR-374a-5p  | 118    | 141   | 1.19 |
| 320 | hsa-miR-181b-3p  | 11     | 13    | 1.18 |
| 321 | hsa-miR-615-3p   | 6      | 7     | 1.17 |
| 322 | hsa-miR-32-3p    | 6      | 7     | 1.17 |
| 323 | hsa-miR-365a-3p  | 155    | 179   | 1.15 |
| 324 | hsa-miR-365b-3p  | 155    | 179   | 1.15 |
| 325 | hsa-miR-6780a-5p | 7      | 8     | 1.14 |
| 326 | hsa-miR-664a-5p  | 83     | 93    | 1.12 |
| 327 | hsa-miR-185-3p   | 34     | 38    | 1.12 |
| 328 | hsa-miR-130b-3p  | 371    | 414   | 1.12 |
| 329 | hsa-let-7a-5p    | 844639 | 9E+05 | 1.09 |
| 330 | hsa-miR-574-3p   | 28     | 30    | 1.07 |
| 331 | hsa-miR-486-5p   | 47     | 50    | 1.06 |
| 332 | hsa-let-7g-5p    | 21532  | 22873 | 1.06 |
| 333 | hsa-miR-548e-3p  | 17     | 18    | 1.06 |
| 334 | hsa-miR-2682-5p  | 43     | 45    | 1.05 |
| 335 | hsa-miR-765      | 22     | 23    | 1.05 |
| 336 | hsa-miR-27b-5p   | 157    | 164   | 1.04 |
| 337 | hsa-miR-423-5p   | 45439  | 45578 | 1.00 |
| 338 | hsa-miR-181a-3p  | 125    | 125   | 1.00 |
| 339 | hsa-miR-122-5p   | 35     | 35    | 1.00 |
| 340 | hsa-miR-504-3p   | 25     | 25    | 1.00 |
| 341 | hsa-miR-7641     | 13     | 13    | 1.00 |
| 342 | hsa-miR-6889-5p  | 7      | 7     | 1.00 |



|     |                   |        |       |      |
|-----|-------------------|--------|-------|------|
| 343 | hsa-miR-30a-3p    | 272    | 264   | 0.97 |
| 344 | hsa-miR-23b-3p    | 218    | 205   | 0.94 |
| 345 | hsa-miR-92b-3p    | 1207   | 1135  | 0.94 |
| 346 | hsa-miR-1278      | 48     | 45    | 0.94 |
| 347 | hsa-miR-22-5p     | 115    | 107   | 0.93 |
| 348 | hsa-miR-4743-5p   | 12     | 11    | 0.92 |
| 349 | hsa-miR-30c-5p    | 86     | 78    | 0.91 |
| 350 | hsa-miR-30a-5p    | 1689   | 1501  | 0.89 |
| 351 | hsa-miR-34a-3p    | 8      | 7     | 0.88 |
| 352 | hsa-miR-181a-2-3p | 177    | 154   | 0.87 |
| 353 | hsa-miR-503-5p    | 546    | 474   | 0.87 |
| 354 | hsa-miR-181b-5p   | 6936   | 5925  | 0.85 |
| 355 | hsa-miR-191-5p    | 12142  | 10091 | 0.83 |
| 356 | hsa-miR-615-5p    | 61     | 49    | 0.80 |
| 357 | hsa-miR-454-3p    | 15     | 12    | 0.80 |
| 358 | hsa-let-7c-5p     | 23765  | 18768 | 0.79 |
| 359 | hsa-miR-4435      | 14     | 11    | 0.79 |
| 360 | hsa-miR-137       | 49     | 38    | 0.78 |
| 361 | hsa-miR-450a-5p   | 13     | 10    | 0.77 |
| 362 | hsa-miR-10b-5p    | 338    | 259   | 0.77 |
| 363 | hsa-miR-146a-5p   | 294    | 225   | 0.77 |
| 364 | hsa-miR-424-5p    | 193    | 137   | 0.71 |
| 365 | hsa-miR-1294      | 10     | 7     | 0.70 |
| 366 | hsa-miR-574-5p    | 106    | 73    | 0.69 |
| 367 | hsa-let-7e-5p     | 117098 | 79153 | 0.68 |
| 368 | hsa-miR-3664-3p   | 12     | 8     | 0.67 |
| 369 | hsa-miR-140-3p    | 36059  | 23635 | 0.66 |
| 370 | hsa-miR-1228-5p   | 26     | 17    | 0.65 |
| 371 | hsa-miR-125a-5p   | 676    | 430   | 0.64 |
| 372 | hsa-miR-22-3p     | 778    | 486   | 0.62 |
| 373 | hsa-miR-224-5p    | 256    | 159   | 0.62 |
| 374 | hsa-miR-28-5p     | 119    | 72    | 0.61 |
| 375 | hsa-miR-92b-5p    | 1292   | 767   | 0.59 |
| 376 | hsa-miR-205-5p    | 36     | 21    | 0.58 |
| 377 | hsa-miR-130b-5p   | 19     | 11    | 0.58 |
| 378 | hsa-miR-28-3p     | 311    | 178   | 0.57 |
| 379 | hsa-miR-23b-5p    | 515    | 293   | 0.57 |
| 380 | hsa-miR-99b-3p    | 154    | 87    | 0.56 |
| 381 | hsa-miR-504-5p    | 16     | 9     | 0.56 |
| 382 | hsa-let-7d-5p     | 26557  | 14753 | 0.56 |
| 383 | hsa-miR-424-3p    | 1105   | 570   | 0.52 |
| 384 | hsa-miR-181a-5p   | 10911  | 5625  | 0.52 |
| 385 | hsa-miR-200c-3p   | 26     | 13    | 0.50 |

|     |                   |        |       |      |
|-----|-------------------|--------|-------|------|
| 386 | hsa-let-7i-5p     | 15762  | 7838  | 0.50 |
| 387 | hsa-miR-642a-3p   | 30     | 14    | 0.47 |
| 388 | hsa-miR-3179      | 13     | 6     | 0.46 |
| 389 | hsa-let-7d-3p     | 162    | 71    | 0.44 |
| 390 | hsa-miR-452-5p    | 985    | 422   | 0.43 |
| 391 | hsa-miR-335-5p    | 40     | 17    | 0.43 |
| 392 | hsa-miR-1255b-5p  | 15     | 6     | 0.40 |
| 393 | hsa-miR-152-3p    | 1093   | 404   | 0.37 |
| 394 | hsa-miR-6758-5p   | 45     | 14    | 0.31 |
| 395 | hsa-miR-34a-5p    | 157    | 46    | 0.29 |
| 396 | hsa-miR-1287-5p   | 28     | 8     | 0.29 |
| 397 | hsa-miR-365a-5p   | 492    | 133   | 0.27 |
| 398 | hsa-let-7b-5p     | 823266 | 2E+05 | 0.27 |
| 399 | hsa-miR-450a-2-3p | 26     | 7     | 0.27 |
| 400 | hsa-miR-532-5p    | 100    | 26    | 0.26 |
| 401 | hsa-miR-4421      | 27     | 7     | 0.26 |
| 402 | hsa-let-7f-5p     | 803209 | 2E+05 | 0.26 |
| 403 | hsa-miR-98-5p     | 827    | 211   | 0.26 |
| 404 | hsa-miR-214-3p    | 297    | 56    | 0.19 |
| 405 | hsa-miR-193b-3p   | 314    | 54    | 0.17 |
| 406 | hsa-miR-193b-5p   | 1976   | 275   | 0.14 |
| 407 | hsa-miR-199a-5p   | 58     | 8     | 0.14 |
| 408 | hsa-miR-199b-3p   | 30478  | 3641  | 0.12 |
| 409 | hsa-miR-199a-3p   | 30480  | 3641  | 0.12 |
| 410 | hsa-miR-26a-5p    | 23063  | 1677  | 0.07 |
