# Supplementary material for: The miR-34a-5p promotes the multi-chemoresistance of osteosarcoma via repression of the AGTR1 gene
Source: PubMed Central journal article supplement (PMC5223322; doi:10.1186/s12885-016-3002-x), 2017-01-10
Supplement: 12885_2016_3002_MOESM3_ESM.pdf [file 12885_2016_3002_MOESM3_ESM.pdf]

|    | SJSA-1    | G-292     | Symbol   | G-292/SJSA-1 |
|----|-----------|-----------|----------|--------------|
| 1  | 544.21717 | 0.01      | CD248    | 54421.7173   |
| 2  | 113.75792 | 0.01      | IFI27    | 11375.79227  |
| 3  | 2731.3045 | 0.3841446 | KRT17    | 7110.095436  |
| 4  | 342.34305 | 0.0746197 | TMEM119  | 4587.836555  |
| 5  | 45.135465 | 0.01      | NPTX2    | 4513.546516  |
| 6  | 45.127401 | 0.01      | GSTT1    | 4512.740106  |
| 7  | 40.978944 | 0.01      | MRGPRF   | 4097.894441  |
| 8  | 439.32972 | 0.1117434 | COL1A2   | 3931.594287  |
| 9  | 32.370141 | 0.01      | PTN      | 3237.014059  |
| 10 | 88.086973 | 0.0275076 | COL11A1  | 3202.283021  |
| 11 | 30.761876 | 0.01      | SLC15A3  | 3076.187561  |
| 12 | 27.890865 | 0.01      | CNN1     | 2789.086494  |
| 13 | 27.328399 | 0.01      | HCP5     | 2732.839932  |
| 14 | 26.528211 | 0.01      | ANXA3    | 2652.821055  |
| 15 | 25.629255 | 0.01      | VCAM1    | 2562.92553   |
| 16 | 20.900406 | 0.01      | THY1     | 2090.040574  |
| 17 | 345.66208 | 0.1671209 | GLI1     | 2068.334997  |
| 18 | 19.359516 | 0.01      | TRIM22   | 1935.951641  |
| 19 | 16.037547 | 0.01      | LIMS2    | 1603.754657  |
| 20 | 15.344484 | 0.01      | DPEP1    | 1534.448375  |
| 21 | 15.081543 | 0.01      | FBLL1    | 1508.154278  |
| 22 | 14.616404 | 0.01      | TEX11    | 1461.640417  |
| 23 | 14.441442 | 0.01      | SELENBP1 | 1444.144235  |
| 24 | 12.957705 | 0.01      | SYT1     | 1295.770493  |
| 25 | 11.888081 | 0.01      | P2RX1    | 1188.808145  |
| 26 | 11.38534  | 0.01      | ATP10A   | 1138.534041  |
| 27 | 11.023276 | 0.01      | EIF1AY   | 1102.327592  |
| 28 | 10.897682 | 0.01      | WFDC1    | 1089.76816   |
| 29 | 10.712124 | 0.01      | LY96     | 1071.212384  |
| 30 | 10.609905 | 0.01      | NR0B1    | 1060.990541  |
| 31 | 10.463172 | 0.01      | CFI      | 1046.317159  |
| 32 | 261.58123 | 0.2569827 | COL3A1   | 1017.894387  |
| 33 | 9.8976016 | 0.01      | CARD16   | 989.7601591  |
| 34 | 9.7173368 | 0.01      | FAP      | 971.7336809  |
| 35 | 9.1852381 | 0.01      | AKR1C1   | 918.5238086  |
| 36 | 9.0421271 | 0.01      | SUN3     | 904.2127074  |
| 37 | 8.9103979 | 0.01      | CPXM1    | 891.039789   |
| 38 | 8.8494049 | 0.01      | ARHGAP9  | 884.9404942  |
| 39 | 8.5937938 | 0.01      | MIR616   | 859.3793822  |
| 40 | 163.48921 | 0.1904989 | LUM      | 858.2159914  |
| 41 | 8.5344557 | 0.01      | CFH      | 853.4455721  |

|    |           |           |          |             |
|----|-----------|-----------|----------|-------------|
| 42 | 8.33598   | 0.01      | PCDHB5   | 833.5980007 |
| 43 | 8.2768596 | 0.01      | TNNC1    | 827.6859581 |
| 44 | 8.0488325 | 0.01      | GFRA1    | 804.883247  |
| 45 | 7.6642326 | 0.01      | PLA1A    | 766.4232565 |
| 46 | 7.624372  | 0.01      | SNORD32A | 762.4371958 |
| 47 | 7.1947446 | 0.01      | LCN2     | 719.4744649 |
| 48 | 7.1637328 | 0.01      | LYPD6B   | 716.3732819 |
| 49 | 7.1343973 | 0.01      | ARSE     | 713.4397303 |
| 50 | 98.078727 | 0.1376693 | CDKN2A   | 712.4226685 |
| 51 | 7.106741  | 0.01      | SLC6A17  | 710.6740975 |
| 52 | 7.0393119 | 0.01      | DDX3Y    | 703.931186  |
| 53 | 6.9721579 | 0.01      | KRT1     | 697.2157901 |
| 54 | 6.9191929 | 0.01      | MGMT     | 691.9192891 |
| 55 | 6.6170928 | 0.01      | SLC1A7   | 661.7092833 |
| 56 | 6.4453454 | 0.01      | SNORD88B | 644.5345366 |
| 57 | 6.2402459 | 0.01      | DRD1     | 624.0245929 |
| 58 | 6.1458298 | 0.01      | KDM5D    | 614.5829764 |
| 59 | 275.33525 | 0.4495491 | ACTG2    | 612.4698054 |
| 60 | 266.33914 | 0.4429623 | RPS4Y1   | 601.268191  |
| 61 | 6.0085764 | 0.01      | ACSL5    | 600.8576351 |
| 62 | 5.9823687 | 0.01      | KERA     | 598.2368664 |
| 63 | 5.9271758 | 0.01      | C1orf51  | 592.7175773 |
| 64 | 5.8993497 | 0.01      | ZNF71    | 589.9349719 |
| 65 | 5.8530532 | 0.01      | FOXS1    | 585.305322  |
| 66 | 5.8224425 | 0.01      | NDN      | 582.2442546 |
| 67 | 5.7821827 | 0.01      | TNFRSF14 | 578.2182664 |
| 68 | 5.7505381 | 0.01      | NKX2-6   | 575.0538084 |
| 69 | 5.6780921 | 0.01      | DMRTA2   | 567.8092123 |
| 70 | 5.657905  | 0.01      | CYYR1    | 565.7904982 |
| 71 | 5.4841974 | 0.01      | SNORD100 | 548.4197373 |
| 72 | 5.412974  | 0.01      | SNORD69  | 541.2974031 |
| 73 | 5.3586576 | 0.01      | PADI3    | 535.8657577 |
| 74 | 5.3435769 | 0.01      | SNORD45C | 534.3576928 |
| 75 | 5.1456667 | 0.01      | SNORD76  | 514.5666671 |
| 76 | 5.1281229 | 0.01      | HNMT     | 512.8122892 |
| 77 | 5.1062665 | 0.01      | SDPR     | 510.6266467 |
| 78 | 5.0649459 | 0.01      | CLCN4    | 506.4945873 |
| 79 | 5.001588  | 0.01      | RNU6ATAC | 500.1588004 |
| 80 | 4.9679073 | 0.01      | CXCL5    | 496.7907277 |
| 81 | 19.165961 | 0.0391051 | SPON1    | 490.1137147 |
| 82 | 4.8170201 | 0.01      | C5orf56  | 481.7020077 |
| 83 | 4.8092192 | 0.01      | SNORA31  | 480.9219235 |
| 84 | 4.7907931 | 0.01      | ACVRL1   | 479.0793107 |

|     |           |           |              |             |
|-----|-----------|-----------|--------------|-------------|
| 85  | 4.7697069 | 0.01      | IP6K3        | 476.970687  |
| 86  | 4.7042777 | 0.01      | CDX1         | 470.4277656 |
| 87  | 4.6177153 | 0.01      | LOC100188947 | 461.7715322 |
| 88  | 4.5587391 | 0.01      | HMSD         | 455.8739066 |
| 89  | 4.5236882 | 0.01      | TAGAP        | 452.3688229 |
| 90  | 4.4794694 | 0.01      | CDKN2B       | 447.9469386 |
| 91  | 4.463047  | 0.01      | CTF1         | 446.3047    |
| 92  | 24.99159  | 0.0564718 | TNFRSF10D    | 442.5499323 |
| 93  | 4.3851062 | 0.01      | GALC         | 438.5106239 |
| 94  | 4.3830054 | 0.01      | LRRC3        | 438.3005361 |
| 95  | 4.3570175 | 0.01      | FAIM3        | 435.7017533 |
| 96  | 4.3435415 | 0.01      | LRRC17       | 434.3541471 |
| 97  | 4.2680689 | 0.01      | PTPLAD2      | 426.806886  |
| 98  | 4.2580166 | 0.01      | KRT34        | 425.8016641 |
| 99  | 4.2493867 | 0.01      | EDA2R        | 424.9386707 |
| 100 | 4.2400712 | 0.01      | BST2         | 424.0071214 |
| 101 | 4.1728993 | 0.01      | HOXC12       | 417.2899297 |
| 102 | 4.1328171 | 0.01      | ATP6V0D2     | 413.2817092 |
| 103 | 931.13473 | 2.2783374 | COL1A1       | 408.6904486 |
| 104 | 4.0270435 | 0.01      | ALOX5AP      | 402.7043482 |
| 105 | 4.0076827 | 0.01      | SULT1C4      | 400.7682696 |
| 106 | 4.0076827 | 0.01      | SNORD13      | 400.7682696 |
| 107 | 3.932066  | 0.01      | ETV7         | 393.2066041 |
| 108 | 3.924661  | 0.01      | LOC729444    | 392.466102  |
| 109 | 3.8698669 | 0.01      | CARD11       | 386.9866922 |
| 110 | 3.8093272 | 0.01      | FAM26E       | 380.9327197 |
| 111 | 3.7585102 | 0.01      | FMO3         | 375.8510207 |
| 112 | 3.7088047 | 0.01      | HCG26        | 370.8804664 |
| 113 | 3.6884867 | 0.01      | SAA1         | 368.8486729 |
| 114 | 3.6116073 | 0.01      | C15orf56     | 361.1607263 |
| 115 | 3.5626069 | 0.01      | PRKCB        | 356.2606878 |
| 116 | 3.473325  | 0.01      | MIR3648      | 347.3325003 |
| 117 | 3.4675458 | 0.01      | FMOD         | 346.754576  |
| 118 | 3.4426348 | 0.01      | LOC100506013 | 344.2634847 |
| 119 | 3.3326146 | 0.01      | PINLYP       | 333.2614608 |
| 120 | 3.2061462 | 0.01      | RNU4ATAC     | 320.6146157 |
| 121 | 3.1893914 | 0.01      | TGM3         | 318.939138  |
| 122 | 3.1575682 | 0.01      | SNORA20      | 315.7568184 |
| 123 | 3.1537455 | 0.01      | CX3CL1       | 315.3745463 |
| 124 | 3.1352137 | 0.01      | METTL7A      | 313.5213719 |
| 125 | 3.0945138 | 0.01      | TNFSF10      | 309.4513827 |
| 126 | 3.0630898 | 0.01      | SNTG2        | 306.3089766 |
| 127 | 3.0369776 | 0.01      | INHBC        | 303.6977641 |

|     |           |           |           |             |
|-----|-----------|-----------|-----------|-------------|
| 128 | 23.02453  | 0.0759984 | FAM19A5   | 302.9605847 |
| 129 | 3.0202826 | 0.01      | LOC645638 | 302.0282611 |
| 130 | 2.9928878 | 0.01      | CFB       | 299.2887758 |
| 131 | 2.9884623 | 0.01      | PODN      | 298.846225  |
| 132 | 2.9848887 | 0.01      | FUOM      | 298.4888674 |
| 133 | 2.9569074 | 0.01      | ENPEP     | 295.6907377 |
| 134 | 2.9428395 | 0.01      | EFCC1     | 294.2839467 |
| 135 | 2.9397047 | 0.01      | ITGA8     | 293.9704694 |
| 136 | 2.926046  | 0.01      | BEX4      | 292.6046024 |
| 137 | 2.9128266 | 0.01      | HSPB3     | 291.2826559 |
| 138 | 11.789865 | 0.0405774 | LYNX1     | 290.5526434 |
| 139 | 2.9025    | 0.01      | DUSP23    | 290.2500002 |
| 140 | 2.8994713 | 0.01      | AKR1E2    | 289.9471307 |
| 141 | 2.8901367 | 0.01      | CASP1     | 289.0136704 |
| 142 | 9.8191294 | 0.0342827 | TRPM2     | 286.4166628 |
| 143 | 2.8053779 | 0.01      | F10       | 280.5377887 |
| 144 | 2.7193292 | 0.01      | KRT76     | 271.9329184 |
| 145 | 2.706487  | 0.01      | SNORA62   | 270.6487015 |
| 146 | 2.6940719 | 0.01      | GPC3      | 269.4071937 |
| 147 | 2.6717885 | 0.01      | SNORD84   | 267.1788464 |
| 148 | 56.393021 | 0.2111186 | VASN      | 267.1154185 |
| 149 | 2.6497076 | 0.01      | KCNMB1    | 264.9707567 |
| 150 | 2.6379684 | 0.01      | MIR4517   | 263.7968357 |
| 151 | 34.836113 | 0.1326409 | APOL1     | 262.6347723 |
| 152 | 10.922949 | 0.0417543 | PCDHB16   | 261.6007782 |
| 153 | 2.6049938 | 0.01      | MIR1909   | 260.4993752 |
| 154 | 2.5728333 | 0.01      | SNORD79   | 257.2833335 |
| 155 | 2.5456907 | 0.01      | GPR183    | 254.569073  |
| 156 | 2.5444125 | 0.01      | KRT16     | 254.4412502 |
| 157 | 2.516634  | 0.01      | NLGN4Y    | 251.6633993 |
| 158 | 2.4848907 | 0.01      | EDN2      | 248.4890702 |
| 159 | 2.4809464 | 0.01      | MIR26A2   | 248.0946431 |
| 160 | 2.4809464 | 0.01      | SNORD45A  | 248.0946431 |
| 161 | 2.4735846 | 0.01      | GMFG      | 247.3584572 |
| 162 | 2.4336758 | 0.01      | CDO1      | 243.3675786 |
| 163 | 2.42325   | 0.01      | MIR1273D  | 242.3250002 |
| 164 | 2.4158817 | 0.01      | TTY15     | 241.5881701 |
| 165 | 2.3998698 | 0.01      | TSPAN2    | 239.986975  |
| 166 | 2.3681761 | 0.01      | VTRNA1-2  | 236.8176138 |
| 167 | 41.223857 | 0.1740983 | CLIP3     | 236.7848934 |
| 168 | 2.3415674 | 0.01      | MIR4754   | 234.1567418 |
| 169 | 2.3120469 | 0.01      | MOV10L1   | 231.2046901 |
| 170 | 2.300514  | 0.01      | LOC339535 | 230.0513963 |

|     |           |           |           |             |
|-----|-----------|-----------|-----------|-------------|
| 171 | 10.79969  | 0.0476923 | SLC14A1   | 226.4449434 |
| 172 | 2.2604869 | 0.01      | SLC44A3   | 226.048686  |
| 173 | 2.2454783 | 0.01      | SLCO2B1   | 224.5478338 |
| 174 | 2.2408548 | 0.01      | SNORD83B  | 224.0854841 |
| 175 | 2.222928  | 0.01      | CPXM2     | 222.2928002 |
| 176 | 2.217016  | 0.01      | AQP7P3    | 221.7015959 |
| 177 | 58.060647 | 0.2640365 | MXRA8     | 219.8963058 |
| 178 | 2.1936789 | 0.01      | SNORD83A  | 219.3678949 |
| 179 | 2.1708281 | 0.01      | SNORD119  | 217.0828127 |
| 180 | 2.1484485 | 0.01      | MIR570    | 214.8448455 |
| 181 | 2.1265255 | 0.01      | MIR635    | 212.6525512 |
| 182 | 2.1265255 | 0.01      | MIR639    | 212.6525512 |
| 183 | 2.1050455 | 0.01      | KRTAP20-2 | 210.5045456 |
| 184 | 2.078798  | 0.01      | SLC16A14  | 207.8798007 |
| 185 | 14.332442 | 0.0700062 | OLFM1     | 204.7310436 |
| 186 | 2.0402748 | 0.01      | KCNE1     | 204.0274827 |
| 187 | 425.22126 | 2.0860053 | DTX3      | 203.8447618 |
| 188 | 2.030253  | 0.01      | LYPD3     | 203.025301  |
| 189 | 2.0298653 | 0.01      | C9orf53   | 202.9865261 |
| 190 | 40.395529 | 0.2003458 | UBD       | 201.6290574 |
| 191 | 2.0038413 | 0.01      | -         | 200.3841348 |
| 192 | 2.0029243 | 0.01      | AK8       | 200.2924258 |
| 193 | 1.9968013 | 0.01      | GALNT5    | 199.6801343 |
| 194 | 1.9942536 | 0.01      | C8orf48   | 199.425359  |
| 195 | 1.9614071 | 0.01      | HIST1H2BH | 196.140706  |
| 196 | 1.9591022 | 0.01      | CCL20     | 195.9102234 |
| 197 | 1.9493151 | 0.01      | SERPINA5  | 194.9315053 |
| 198 | 1.9367983 | 0.01      | LIPC      | 193.6798329 |
| 199 | 1.8991893 | 0.01      | PRR26     | 189.9189276 |
| 200 | 1.8945409 | 0.01      | MIR2682   | 189.4540911 |
| 201 | 1.8945409 | 0.01      | SNORD23   | 189.4540911 |
| 202 | 1.8945409 | 0.01      | MIR7-1    | 189.4540911 |
| 203 | 1.8945409 | 0.01      | MIR5006   | 189.4540911 |
| 204 | 1.8682922 | 0.01      | CXCL10    | 186.8292178 |
| 205 | 96.575378 | 0.5174528 | RARRES3   | 186.6361278 |
| 206 | 1.8654687 | 0.01      | PPP1R14A  | 186.5468672 |
| 207 | 1.8607098 | 0.01      | SNORD11B  | 186.0709823 |
| 208 | 1.8573931 | 0.01      | SERPINB7  | 185.739305  |
| 209 | 1.8538132 | 0.01      | NTF3      | 185.3813197 |
| 210 | 1.8161176 | 0.01      | LINC00515 | 181.6117649 |
| 211 | 1.8151761 | 0.01      | GJC2      | 181.517607  |
| 212 | 21.069359 | 0.1167716 | CLDN1     | 180.4321569 |
| 213 | 1.802524  | 0.01      | HEPH      | 180.2523954 |

|     |           |           |              |             |
|-----|-----------|-----------|--------------|-------------|
| 214 | 1.7811923 | 0.01      | RNU5A-1      | 178.1192309 |
| 215 | 1.7811923 | 0.01      | RNU5B-1      | 178.1192309 |
| 216 | 1.770787  | 0.01      | SOSTDC1      | 177.0787043 |
| 217 | 10.324152 | 0.0597887 | MMP19        | 172.6771942 |
| 218 | 1.7132993 | 0.01      | ZIK1         | 171.3299329 |
| 219 | 1.7081926 | 0.01      | ARL17B       | 170.8192624 |
| 220 | 1.6655305 | 0.01      | IGSF23       | 166.5530471 |
| 221 | 1.6435292 | 0.01      | NPB          | 164.3529181 |
| 222 | 1.6393274 | 0.01      | VNN2         | 163.9327435 |
| 223 | 24.805702 | 0.1528035 | BDKRB1       | 162.3372417 |
| 224 | 1.5928624 | 0.01      | HIST1H1E     | 159.2862422 |
| 225 | 34.403995 | 0.2162917 | NES          | 159.0629232 |
| 226 | 1.5669135 | 0.01      | SNORA66      | 156.6913535 |
| 227 | 1.5552202 | 0.01      | SNORA5A      | 155.5220151 |
| 228 | 1.55088   | 0.01      | LINC00592    | 155.0880001 |
| 229 | 1.5437    | 0.01      | SNORA63      | 154.3700001 |
| 230 | 1.5437    | 0.01      | RNU11        | 154.3700001 |
| 231 | 3.7816984 | 0.0245461 | GAS7         | 154.0652807 |
| 232 | 44.449105 | 0.2887505 | COL16A1      | 153.9360309 |
| 233 | 1.5351713 | 0.01      | C1orf54      | 153.5171272 |
| 234 | 1.5347893 | 0.01      | USP9Y        | 153.4789313 |
| 235 | 1.5291368 | 0.01      | FTH1P3       | 152.9136794 |
| 236 | 1.5267363 | 0.01      | DNASE1L2     | 152.6736265 |
| 237 | 1.5101413 | 0.01      | SNORA71A     | 151.0141306 |
| 238 | 17.908374 | 0.1186273 | SARDH        | 150.9632945 |
| 239 | 1.5079559 | 0.01      | CRYAB        | 150.7955862 |
| 240 | 1.5054659 | 0.01      | FAM167B      | 150.5465946 |
| 241 | 1.5046895 | 0.01      | GLP2R        | 150.4689532 |
| 242 | 1.499277  | 0.01      | SCARA5       | 149.927698  |
| 243 | 1.499277  | 0.01      | SNORA7B      | 149.927698  |
| 244 | 1.4885679 | 0.01      | TMEM52B      | 148.8567858 |
| 245 | 1.4885679 | 0.01      | SNORA29      | 148.8567858 |
| 246 | 1.4809282 | 0.01      | OLR1         | 148.092815  |
| 247 | 48.873965 | 0.3313115 | CTSK         | 147.5166438 |
| 248 | 96.342064 | 0.6608126 | GDF15        | 145.7933187 |
| 249 | 1.4393059 | 0.01      | BCAS1        | 143.93059   |
| 250 | 40.583061 | 0.2828742 | C1S          | 143.4668299 |
| 251 | 1.4081047 | 0.01      | MIR3689B     | 140.8104731 |
| 252 | 1.4068373 | 0.01      | ZNF284       | 140.683731  |
| 253 | 1.4055147 | 0.01      | LOC100233156 | 140.5514716 |
| 254 | 1.3699228 | 0.01      | TNNT3        | 136.9922762 |
| 255 | 1.3695476 | 0.01      | PSORS1C1     | 136.9547646 |
| 256 | 350.61651 | 2.5781983 | ACTA2        | 135.9928428 |

|     |           |           |              |             |
|-----|-----------|-----------|--------------|-------------|
| 257 | 1.3514883 | 0.01      | SPTLC3       | 135.1488328 |
| 258 | 1.3347782 | 0.01      | LINC00654    | 133.4778197 |
| 259 | 1.3316262 | 0.01      | TNN          | 133.1626199 |
| 260 | 113.61894 | 0.8540163 | NPPB         | 133.0407116 |
| 261 | 1.3106887 | 0.01      | ZNF285       | 131.068868  |
| 262 | 1.2841519 | 0.01      | GSTT2        | 128.415185  |
| 263 | 9.2921748 | 0.0724732 | ASB2         | 128.2154011 |
| 264 | 51.732358 | 0.40621   | ITGB2        | 127.3537382 |
| 265 | 16.778796 | 0.1324665 | SH3RF2       | 126.6644084 |
| 266 | 1.2645601 | 0.01      | GYG2P1       | 126.4560074 |
| 267 | 1.2554187 | 0.01      | LOC100505679 | 125.5418676 |
| 268 | 1.2502047 | 0.01      | LOC344887    | 125.0204662 |
| 269 | 55.124041 | 0.4442642 | C11orf96     | 124.0794203 |
| 270 | 1.2263769 | 0.01      | INPP5D       | 122.6376929 |
| 271 | 1.2085023 | 0.01      | C1orf110     | 120.8502256 |
| 272 | 95.537063 | 0.7978933 | C1R          | 119.7366406 |
| 273 | 1.1940033 | 0.01      | TMEM100      | 119.4003306 |
| 274 | 1.193615  | 0.01      | MAP9         | 119.3615029 |
| 275 | 1.1840881 | 0.01      | PLCE1-AS1    | 118.4088069 |
| 276 | 1.171097  | 0.01      | ZFP112       | 117.1097004 |
| 277 | 1.1707837 | 0.01      | SNORA81      | 117.0783709 |
| 278 | 1.1688138 | 0.01      | GYPE         | 116.8813798 |
| 279 | 61.083869 | 0.5287194 | PDGFRB       | 115.5317269 |
| 280 | 1.1387951 | 0.01      | KEL          | 113.8795083 |
| 281 | 1.1318371 | 0.01      | MGP          | 113.1837068 |
| 282 | 1.1241208 | 0.01      | ZNF300       | 112.4120768 |
| 283 | 1.122284  | 0.01      | ZNF223       | 112.2283969 |
| 284 | 41.448023 | 0.3737559 | FGF19        | 110.8959819 |
| 285 | 1.0957581 | 0.01      | LPAR6        | 109.5758134 |
| 286 | 1.0856599 | 0.01      | AMZ1         | 108.565991  |
| 287 | 1.0788885 | 0.01      | CLIC5        | 107.8888528 |
| 288 | 1.0748398 | 0.01      | CCRL2        | 107.4839829 |
| 289 | 22.883954 | 0.2148698 | NUPR1        | 106.5015024 |
| 290 | 1.0571947 | 0.01      | KCNK7        | 105.7194674 |
| 291 | 1.0458322 | 0.01      | SEMA3B       | 104.5832219 |
| 292 | 1.0274421 | 0.01      | RCVRN        | 102.7442072 |
| 293 | 1.0262499 | 0.01      | IFI44L       | 102.6249874 |
| 294 | 1.0198997 | 0.01      | LOC654342    | 101.9899675 |
| 295 | 2.0901802 | 0.0206271 | SCN9A        | 101.3315283 |
| 296 | 545.54992 | 5.3838124 | B4GALNT1     | 101.3315265 |
| 297 | 1.0089765 | 0.01      | P4HA3        | 100.8976453 |
| 298 | 0.9950863 | 0.01      | THEGL        | 99.508629   |
| 299 | 0.9866362 | 0.01      | BPI          | 98.6636245  |

|     |           |           |              |             |
|-----|-----------|-----------|--------------|-------------|
| 300 | 21.294125 | 0.2160213 | TES          | 98.57420625 |
| 301 | 0.9853404 | 0.01      | NANOS3       | 98.5340426  |
| 302 | 0.9845646 | 0.01      | C10orf107    | 98.4564568  |
| 303 | 0.9830165 | 0.01      | ST7-AS1      | 98.301651   |
| 304 | 0.9816935 | 0.01      | LRRC29       | 98.1693473  |
| 305 | 0.9702025 | 0.01      | IPLL5        | 97.0202515  |
| 306 | 34.486038 | 0.3586261 | CCL26        | 96.16155056 |
| 307 | 0.960999  | 0.01      | MBLAC1       | 96.0999013  |
| 308 | 7.0513991 | 0.0741257 | CYS1         | 95.12755592 |
| 309 | 0.9405017 | 0.01      | GRIP2        | 94.0501693  |
| 310 | 0.9277663 | 0.01      | NYAP1        | 92.7766278  |
| 311 | 0.9172513 | 0.01      | NTM          | 91.7251321  |
| 312 | 0.9160418 | 0.01      | ACCSL        | 91.6041759  |
| 313 | 0.9055223 | 0.01      | AGXT         | 90.5522347  |
| 314 | 0.9021623 | 0.01      | HIST1H3E     | 90.2162338  |
| 315 | 11.041874 | 0.1227453 | DIRAS3       | 89.9575799  |
| 316 | 0.8964902 | 0.01      | STYK1        | 89.6490239  |
| 317 | 0.8950587 | 0.01      | ZNF93        | 89.5058698  |
| 318 | 0.8868064 | 0.01      | HIST1H2AL    | 88.6806384  |
| 319 | 0.8761541 | 0.01      | CYP3A5       | 87.6154055  |
| 320 | 0.8717986 | 0.01      | ZFY          | 87.1798632  |
| 321 | 0.8632954 | 0.01      | PCDHB4       | 86.3295361  |
| 322 | 0.8584943 | 0.01      | HRCT1        | 85.8494336  |
| 323 | 0.8523497 | 0.01      | CCIN         | 85.2349694  |
| 324 | 0.8518912 | 0.01      | TXLNG2P      | 85.1891244  |
| 325 | 0.8514791 | 0.01      | TMEM249      | 85.1479061  |
| 326 | 0.8471524 | 0.01      | LOC101059948 | 84.715244   |
| 327 | 0.8455243 | 0.01      | ESPNL        | 84.5524344  |
| 328 | 0.8417752 | 0.01      | DDO          | 84.1775246  |
| 329 | 0.8395951 | 0.01      | MYOCD        | 83.9595109  |
| 330 | 0.8359865 | 0.01      | HTR3C        | 83.5986534  |
| 331 | 0.8322664 | 0.01      | GPR15        | 83.2266374  |
| 332 | 0.8321714 | 0.01      | MAGEA3       | 83.2171421  |
| 333 | 10.108457 | 0.12297   | ENPP2        | 82.20261623 |
| 334 | 0.8182403 | 0.01      | ZNF808       | 81.824026   |
| 335 | 0.8083766 | 0.01      | LOC201651    | 80.8376649  |
| 336 | 4.0975954 | 0.0508061 | LMOD1        | 80.65162349 |
| 337 | 0.8056682 | 0.01      | GRAP2        | 80.5668171  |
| 338 | 0.8002175 | 0.01      | LGALS12      | 80.0217499  |
| 339 | 0.7994866 | 0.01      | FLJ27352     | 79.9486574  |
| 340 | 0.7964312 | 0.01      | HRASLS2      | 79.6431211  |
| 341 | 0.789392  | 0.01      | DEFB109P1B   | 78.9392046  |
| 342 | 0.788894  | 0.01      | SNX29P2      | 78.8894007  |



|     |           |           |              |             |
|-----|-----------|-----------|--------------|-------------|
| 343 | 135.94127 | 1.7466069 | LCP1         | 77.83163631 |
| 344 | 0.7747193 | 0.01      | CCR1         | 77.4719332  |
| 345 | 0.7674443 | 0.01      | PTGFR        | 76.7444302  |
| 346 | 0.7656628 | 0.01      | CCDC36       | 76.5662826  |
| 347 | 0.7649693 | 0.01      | ADHFE1       | 76.4969324  |
| 348 | 0.7623393 | 0.01      | WISP1        | 76.2339334  |
| 349 | 0.7578164 | 0.01      | LINC00483    | 75.7816364  |
| 350 | 0.7543873 | 0.01      | MTNR1A       | 75.4387331  |
| 351 | 0.7518019 | 0.01      | FLJ22447     | 75.1801949  |
| 352 | 12.972899 | 0.1726566 | DYSF         | 75.13698208 |
| 353 | 0.7481893 | 0.01      | AKR1C2       | 74.8189313  |
| 354 | 0.7441658 | 0.01      | PRUNE2       | 74.4165808  |
| 355 | 0.7411078 | 0.01      | DBH          | 74.1107753  |
| 356 | 0.7408598 | 0.01      | TDRD9        | 74.0859787  |
| 357 | 0.736394  | 0.01      | CD74         | 73.6393994  |
| 358 | 92.821382 | 1.2621392 | CPZ          | 73.54290637 |
| 359 | 0.7310553 | 0.01      | CDH3         | 73.1055309  |
| 360 | 0.7286696 | 0.01      | C2orf15      | 72.8669581  |
| 361 | 0.7286696 | 0.01      | CYP39A1      | 72.8669581  |
| 362 | 0.7241122 | 0.01      | TNFAIP6      | 72.4112231  |
| 363 | 0.7223553 | 0.01      | LOC100130880 | 72.2355287  |
| 364 | 0.7196115 | 0.01      | PRKY         | 71.9611534  |
| 365 | 1.0210584 | 0.0143114 | DMD          | 71.345669   |
| 366 | 52.503421 | 0.7394744 | INHBE        | 71.00100155 |
| 367 | 0.7040524 | 0.01      | NPFF         | 70.4052365  |
| 368 | 0.698741  | 0.01      | KRTAP1-5     | 69.874099   |
| 369 | 13.802196 | 0.1982438 | GBP1         | 69.6223414  |
| 370 | 0.6954377 | 0.01      | LOC285441    | 69.5437709  |
| 371 | 0.6935092 | 0.01      | C1orf94      | 69.3509152  |
| 372 | 0.6912854 | 0.01      | GPR65        | 69.1285383  |
| 373 | 202.56176 | 2.9389172 | ALPL         | 68.92394111 |
| 374 | 0.6839177 | 0.01      | ZNF846       | 68.3917722  |
| 375 | 5.0363848 | 0.0738    | F2RL3        | 68.24368137 |
| 376 | 26.923205 | 0.3951144 | C3           | 68.14028155 |
| 377 | 0.6810441 | 0.01      | P2RX6        | 68.1044118  |
| 378 | 20.572973 | 0.3037647 | CTSW         | 67.72668349 |
| 379 | 0.6770614 | 0.01      | PCDHGA10     | 67.7061404  |
| 380 | 0.6733425 | 0.01      | LOC643733    | 67.3342488  |
| 381 | 5.8237178 | 0.08665   | DSC3         | 67.20968617 |
| 382 | 14.032425 | 0.2087858 | SYTL3        | 67.20968605 |
| 383 | 2.5169022 | 0.0374485 | FSTL4        | 67.20968549 |
| 384 | 0.6710196 | 0.01      | FAM218A      | 67.101955   |
| 385 | 0.6686615 | 0.01      | LOC646736    | 66.8661498  |

|     |           |           |              |             |
|-----|-----------|-----------|--------------|-------------|
| 386 | 0.6665229 | 0.01      | ZNF542       | 66.6522922  |
| 387 | 0.6660259 | 0.01      | CAPN12       | 66.6025887  |
| 388 | 0.6631647 | 0.01      | PPP5D1       | 66.3164678  |
| 389 | 0.6609862 | 0.01      | BMP5         | 66.0986181  |
| 390 | 11.482315 | 0.1748788 | DCN          | 65.65869324 |
| 391 | 0.6546581 | 0.01      | LRRIQ3       | 65.4658116  |
| 392 | 0.6520635 | 0.01      | FLJ26245     | 65.2063517  |
| 393 | 0.6512484 | 0.01      | LOC100289361 | 65.1248438  |
| 394 | 0.6497256 | 0.01      | ZNF439       | 64.9725644  |
| 395 | 0.6492196 | 0.01      | ARL14EPL     | 64.9219627  |
| 396 | 0.6492196 | 0.01      | LOC100133445 | 64.9219627  |
| 397 | 0.6472034 | 0.01      | CXCL11       | 64.7203417  |
| 398 | 0.6472034 | 0.01      | LINC00854    | 64.7203417  |
| 399 | 0.6462    | 0.01      | STARD13-AS   | 64.6200001  |
| 400 | 0.6402442 | 0.01      | LOC650293    | 64.024424   |
| 401 | 2.9577407 | 0.0468934 | PTCH2        | 63.07370561 |
| 402 | 0.6267654 | 0.01      | LAG3         | 62.6765414  |
| 403 | 0.6225527 | 0.01      | MGARP        | 62.2552652  |
| 404 | 390.71474 | 6.2845398 | LGALS3BP     | 62.17077992 |
| 405 | 4.1349107 | 0.0666494 | FIBIN        | 62.03971044 |
| 406 | 0.6172514 | 0.01      | C8orf34      | 61.7251389  |
| 407 | 0.6161109 | 0.01      | ASB15        | 61.6110865  |
| 408 | 8.8035288 | 0.143094  | CPA4         | 61.5227126  |
| 409 | 0.615151  | 0.01      | SOX8         | 61.5151034  |
| 410 | 0.6138424 | 0.01      | ANKRD7       | 61.3842416  |
| 411 | 0.6087619 | 0.01      | MDS2         | 60.8761928  |
| 412 | 0.6040565 | 0.01      | ZNF154       | 60.4056522  |
| 413 | 44.934651 | 0.747369  | COL7A1       | 60.1237779  |
| 414 | 0.5898099 | 0.01      | HCG4B        | 58.9809906  |
| 415 | 0.5868906 | 0.01      | DIRC3        | 58.6890553  |
| 416 | 0.5853919 | 0.01      | HIST1H4J     | 58.5391854  |
| 417 | 0.5852654 | 0.01      | FILIP1       | 58.5265393  |
| 418 | 64.429941 | 1.102861  | KISS1        | 58.420727   |
| 419 | 0.5828192 | 0.01      | MAG          | 58.2819217  |
| 420 | 10.513849 | 0.1815746 | UBA7         | 57.90372947 |
| 421 | 0.5738159 | 0.01      | ZNF528       | 57.3815895  |
| 422 | 0.5735108 | 0.01      | WNT2         | 57.3510836  |
| 423 | 6.9327289 | 0.1211711 | NEDD9        | 57.21439951 |
| 424 | 7.4139538 | 0.1303673 | SOD3         | 56.86973421 |
| 425 | 0.5683623 | 0.01      | BEX2         | 56.8362273  |
| 426 | 0.5675024 | 0.01      | KRT77        | 56.7502421  |
| 427 | 41.203988 | 0.726735  | STOM         | 56.69740172 |
| 428 | 0.5647683 | 0.01      | TMEM220-AS1  | 56.4768293  |

|     |           |           |              |             |
|-----|-----------|-----------|--------------|-------------|
| 429 | 0.5579639 | 0.01      | CD38         | 55.7963856  |
| 430 | 0.5563678 | 0.01      | MAGIX        | 55.6367849  |
| 431 | 0.555732  | 0.01      | LOC100507377 | 55.5732     |
| 432 | 0.5554358 | 0.01      | LOC100289230 | 55.5435768  |
| 433 | 0.554254  | 0.01      | RAB33A       | 55.425399   |
| 434 | 21.27743  | 0.3846333 | MAP1LC3A     | 55.31874152 |
| 435 | 0.5527838 | 0.01      | C4BPB        | 55.278382   |
| 436 | 0.5527838 | 0.01      | HIST1H4E     | 55.278382   |
| 437 | 0.550905  | 0.01      | ZCCHC5       | 55.0905023  |
| 438 | 0.5505931 | 0.01      | PMCH         | 55.0593131  |
| 439 | 0.5498668 | 0.01      | LOC100652791 | 54.9866755  |
| 440 | 0.5472197 | 0.01      | ZNF880       | 54.7219694  |
| 441 | 0.5465022 | 0.01      | RAET1G       | 54.6502186  |
| 442 | 6.8168061 | 0.125575  | SYN1         | 54.28474619 |
| 443 | 0.5417195 | 0.01      | PADI1        | 54.1719522  |
| 444 | 0.5395139 | 0.01      | FLG          | 53.9513886  |
| 445 | 0.5391966 | 0.01      | C17orf82     | 53.9196637  |
| 446 | 0.538732  | 0.01      | ZNF433       | 53.8732013  |
| 447 | 0.5362828 | 0.01      | FAM57B       | 53.6282811  |
| 448 | 0.5349063 | 0.01      | WFIKKN1      | 53.4906315  |
| 449 | 0.5327186 | 0.01      | NPY4R        | 53.2718559  |
| 450 | 24.815201 | 0.4660066 | GBP2         | 53.25075118 |
| 451 | 0.5316314 | 0.01      | HERC2P4      | 53.1631378  |
| 452 | 2411.1861 | 45.46192  | DCTN2        | 53.03748967 |
| 453 | 0.5292686 | 0.01      | C16orf93     | 52.9268572  |
| 454 | 2.5227568 | 0.0478395 | MAPK10       | 52.73375357 |
| 455 | 1.1836925 | 0.0224466 | SOX6         | 52.73375264 |
| 456 | 0.5262614 | 0.01      | MPZ          | 52.6261364  |
| 457 | 0.5249358 | 0.01      | MIR497HG     | 52.4935769  |
| 458 | 0.5178914 | 0.01      | SEC16B       | 51.7891402  |
| 459 | 0.5135522 | 0.01      | CLDN7        | 51.3552243  |
| 460 | 0.5114098 | 0.01      | FLJ13224     | 51.1409816  |
| 461 | 0.5112007 | 0.01      | MAMDC4       | 51.1200736  |
| 462 | 0.5076724 | 0.01      | VMO1         | 50.7672351  |
| 463 | 255.95133 | 5.0517611 | IL32         | 50.66576326 |
| 464 | 41.203398 | 0.8132395 | EDIL3        | 50.66576325 |
| 465 | 5.0253816 | 0.0991869 | CTSF         | 50.66576308 |
| 466 | 3.2781944 | 0.0647024 | IQUB         | 50.66576297 |
| 467 | 0.5027732 | 0.01      | SLAMF8       | 50.2773221  |
| 468 | 0.4988618 | 0.01      | ZNF69        | 49.886176   |
| 469 | 11.455111 | 0.230802  | SYNC         | 49.63176805 |
| 470 | 0.4961893 | 0.01      | SPANXA2      | 49.6189286  |
| 471 | 0.4955993 | 0.01      | SAP25        | 49.5599287  |

|     |           |           |              |             |
|-----|-----------|-----------|--------------|-------------|
| 472 | 0.4954029 | 0.01      | LOC100133315 | 49.5402932  |
| 473 | 16.04629  | 0.3260237 | COL8A1       | 49.21817004 |
| 474 | 0.4921716 | 0.01      | STBD1        | 49.2171559  |
| 475 | 0.4907367 | 0.01      | ZNF600       | 49.0736657  |
| 476 | 11.931655 | 0.2444782 | MATN2        | 48.80457197 |
| 477 | 7.5899082 | 0.1561781 | GPR1         | 48.59777293 |
| 478 | 2.8597888 | 0.0588461 | PLAGL1       | 48.59777273 |
| 479 | 0.4855534 | 0.01      | FAM65C       | 48.5553355  |
| 480 | 0.4855534 | 0.01      | HERC2P3      | 48.5553355  |
| 481 | 0.4836658 | 0.01      | PABPC5       | 48.3665797  |
| 482 | 0.4835255 | 0.01      | ZFHX4-AS1    | 48.3525522  |
| 483 | 0.4835255 | 0.01      | HIST1H2BB    | 48.3525522  |
| 484 | 0.4815702 | 0.01      | LOC100130000 | 48.1570191  |
| 485 | 1.9478546 | 0.0405121 | SYNPO2       | 48.08077544 |
| 486 | 0.4801832 | 0.01      | FAM222A-AS1  | 48.018318   |
| 487 | 41.359011 | 0.8620524 | JAG2         | 47.97737582 |
| 488 | 97.393436 | 2.0358368 | CALB2        | 47.8395098  |
| 489 | 0.4757979 | 0.01      | ZCWPW2       | 47.5797946  |
| 490 | 23.313174 | 0.4901455 | HSPB8        | 47.56377772 |
| 491 | 0.4741741 | 0.01      | PTPRR        | 47.4174062  |
| 492 | 0.4725612 | 0.01      | SCGB2B2      | 47.2561225  |
| 493 | 0.4725612 | 0.01      | LOC100130348 | 47.2561225  |
| 494 | 7.1889138 | 0.1528035 | SELPLG       | 47.04678024 |
| 495 | 0.4704278 | 0.01      | CLEC3B       | 47.0427766  |
| 496 | 1983.1729 | 42.501376 | OS9          | 46.66138196 |
| 497 | 0.4652719 | 0.01      | TP63         | 46.527187   |
| 498 | 0.460043  | 0.01      | RTP1         | 46.0043047  |
| 499 | 86.307724 | 1.895176  | SLC26A10     | 45.54074373 |
| 500 | 2.8744759 | 0.0631811 | KCNE4        | 45.49578763 |
| 501 | 3.0483969 | 0.0670039 | KLHDC7B      | 45.49578711 |
| 502 | 0.4540294 | 0.01      | LINC00173    | 45.4029412  |
| 503 | 63.782276 | 1.4062964 | ESRG         | 45.35478807 |
| 504 | 18.652667 | 0.4113221 | CACNG4       | 45.34807381 |
| 505 | 0.453324  | 0.01      | TMPRSS3      | 45.3323959  |
| 506 | 0.4528455 | 0.01      | PCDHGA1      | 45.2845502  |
| 507 | 0.4525505 | 0.01      | SPATA3       | 45.2550489  |
| 508 | 394.7517  | 8.7997381 | DDIT3        | 44.8594827  |
| 509 | 0.4466615 | 0.01      | GUCY1B3      | 44.6661513  |
| 510 | 0.4462516 | 0.01      | HIST1H3G     | 44.6251606  |
| 511 | 0.4443486 | 0.01      | HIST1H2AI    | 44.4348614  |
| 512 | 0.4443486 | 0.01      | SPANXE       | 44.4348614  |
| 513 | 0.4424618 | 0.01      | PSPN         | 44.2461784  |
| 514 | 41.518036 | 0.9392521 | SAMD11       | 44.20329347 |

|     |           |           |              |             |
|-----|-----------|-----------|--------------|-------------|
| 515 | 2.7497305 | 0.062328  | MEG3         | 44.11712731 |
| 516 | 0.4403249 | 0.01      | SEMA4A       | 44.0324932  |
| 517 | 0.4402806 | 0.01      | TOB1-AS1     | 44.0280634  |
| 518 | 76.849217 | 1.7457672 | MAP1A        | 44.02031115 |
| 519 | 0.4378141 | 0.01      | LINC00340    | 43.7814076  |
| 520 | 0.4367436 | 0.01      | LOC283335    | 43.6743626  |
| 521 | 0.435072  | 0.01      | PCDHGA2      | 43.5072025  |
| 522 | 0.434709  | 0.01      | CORO6        | 43.4709012  |
| 523 | 0.7411329 | 0.0170659 | IGFN1        | 43.42779817 |
| 524 | 0.4326334 | 0.01      | TEK          | 43.2633382  |
| 525 | 3047.4135 | 70.503429 | HLA-B        | 43.2236205  |
| 526 | 0.4296897 | 0.01      | SLC51A       | 42.9689691  |
| 527 | 0.4290999 | 0.01      | TXK          | 42.9099863  |
| 528 | 0.4279251 | 0.01      | C4orf47      | 42.7925052  |
| 529 | 0.4270482 | 0.01      | KLHL35       | 42.7048156  |
| 530 | 0.4261748 | 0.01      | USP30-AS1    | 42.6174847  |
| 531 | 0.424547  | 0.01      | HAL          | 42.4546983  |
| 532 | 0.4244389 | 0.01      | ZNF726       | 42.4438901  |
| 533 | 0.4235762 | 0.01      | SEC24B-AS1   | 42.357622   |
| 534 | 0.422717  | 0.01      | HSD11B1      | 42.2717039  |
| 535 | 0.4220322 | 0.01      | MIR137HG     | 42.20322    |
| 536 | 0.4201603 | 0.01      | C8orf56      | 42.0160283  |
| 537 | 0.4193149 | 0.01      | TNFRSF17     | 41.931489   |
| 538 | 0.4184729 | 0.01      | MEG8         | 41.8472892  |
| 539 | 0.4173207 | 0.01      | SIM1         | 41.7320651  |
| 540 | 0.4172998 | 0.01      | SH3GLIP1     | 41.729976   |
| 541 | 0.416799  | 0.01      | BZRAP1-AS1   | 41.6799     |
| 542 | 0.4163826 | 0.01      | PMF1-BGLAP   | 41.6382618  |
| 543 | 0.4151384 | 0.01      | B3GNT6       | 41.5138447  |
| 544 | 0.4138195 | 0.01      | LYPD5        | 41.38195    |
| 545 | 0.4114501 | 0.01      | LOC100128993 | 41.1450148  |
| 546 | 6.4104315 | 0.1559666 | RHBDD1       | 41.10130806 |
| 547 | 47.120286 | 1.150059  | ID2          | 40.97205856 |
| 548 | 4.6414143 | 0.1132928 | IL34         | 40.96831645 |
| 549 | 56.113632 | 1.374537  | EMILIN1      | 40.8236611  |
| 550 | 0.4071893 | 0.01      | AOAH         | 40.7189332  |
| 551 | 0.4062368 | 0.01      | ZFP28        | 40.6236842  |
| 552 | 0.4046592 | 0.01      | UPK1B        | 40.4659224  |
| 553 | 0.403454  | 0.01      | MYO7B        | 40.3453984  |
| 554 | 2.2420912 | 0.0555994 | MTL5         | 40.32581165 |
| 555 | 2.340219  | 0.0580328 | FOXE1        | 40.32581132 |
| 556 | 0.4030938 | 0.01      | SCGB3A1      | 40.3093811  |
| 557 | 0.4023156 | 0.01      | AHSP         | 40.2315637  |

|     |           |           |              |             |
|-----|-----------|-----------|--------------|-------------|
| 558 | 0.4012827 | 0.01      | CP           | 40.1282735  |
| 559 | 0.4007683 | 0.01      | LOC729059    | 40.076827   |
| 560 | 5.928046  | 0.1479522 | JAK3         | 40.06731268 |
| 561 | 0.3995389 | 0.01      | KCNIP2       | 39.9538919  |
| 562 | 0.3984694 | 0.01      | LHB          | 39.8469408  |
| 563 | 0.3982156 | 0.01      | LOC285084    | 39.8215605  |
| 564 | 2.8426504 | 0.0714076 | ZNF608       | 39.8088141  |
| 565 | 0.3965737 | 0.01      | LOC339240    | 39.657374   |
| 566 | 0.3940989 | 0.01      | GCSAML       | 39.4098904  |
| 567 | 1.6505171 | 0.0420066 | RASGRP3      | 39.29181602 |
| 568 | 0.3924661 | 0.01      | LOC100506136 | 39.2466102  |
| 569 | 0.3917284 | 0.01      | NLGN4Y-AS1   | 39.1728384  |
| 570 | 0.3917284 | 0.01      | FITM1        | 39.1728384  |
| 571 | 0.3914831 | 0.01      | SPEF1        | 39.1483094  |
| 572 | 0.3884427 | 0.01      | GRIK1-AS2    | 38.8442684  |
| 573 | 0.388081  | 0.01      | C1orf227     | 38.8081006  |
| 574 | 0.3873597 | 0.01      | KANSL1-AS1   | 38.7359666  |
| 575 | 0.386641  | 0.01      | COL4A2-AS1   | 38.6641002  |
| 576 | 10.751149 | 0.2785092 | IL20RB       | 38.60248636 |
| 577 | 16.683877 | 0.432197  | BDKRB2       | 38.60248629 |
| 578 | 0.385925  | 0.01      | LOC654433    | 38.5925     |
| 579 | 0.3841465 | 0.01      | RNF5P1       | 38.4146544  |
| 580 | 0.3837928 | 0.01      | LGALS2       | 38.3792818  |
| 581 | 82.3905   | 2.1535596 | HLA-F        | 38.25782123 |
| 582 | 0.3823844 | 0.01      | TMEM244      | 38.2384404  |
| 583 | 0.3814512 | 0.01      | KCNRG        | 38.145119   |
| 584 | 0.381285  | 0.01      | NCALD        | 38.1285024  |
| 585 | 0.3797713 | 0.01      | PMEL         | 37.9771299  |
| 586 | 0.3795984 | 0.01      | LOC441455    | 37.9598361  |
| 587 | 0.3788022 | 0.01      | MYT1L        | 37.8802223  |
| 588 | 0.378564  | 0.01      | CDRT15P1     | 37.8564033  |
| 589 | 0.3778395 | 0.01      | ZNF229       | 37.7839545  |
| 590 | 0.3752242 | 0.01      | TGM5         | 37.5224163  |
| 591 | 0.373699  | 0.01      | FBXO39       | 37.3699044  |
| 592 | 2.3522126 | 0.063191  | DIO2         | 37.22382598 |
| 593 | 1.631662  | 0.0438338 | CD163L1      | 37.22382568 |
| 594 | 0.372142  | 0.01      | CYP2D7P1     | 37.2141965  |
| 595 | 0.3679803 | 0.01      | CPA3         | 36.7980283  |
| 596 | 0.3675476 | 0.01      | HSD17B3      | 36.7547619  |
| 597 | 0.3669005 | 0.01      | ZNF724P      | 36.6900528  |
| 598 | 0.3669005 | 0.01      | ZNF610       | 36.6900528  |
| 599 | 0.365186  | 0.01      | CHAD         | 36.518604   |
| 600 | 0.3634452 | 0.01      | TLR1         | 36.3445239  |

|     |           |           |              |             |
|-----|-----------|-----------|--------------|-------------|
| 601 | 3.4429939 | 0.0951371 | ADAMTS10     | 36.18983096 |
| 602 | 0.3615093 | 0.01      | MXRA5        | 36.1509337  |
| 603 | 0.3613864 | 0.01      | KIAA1257     | 36.1386416  |
| 604 | 0.3602411 | 0.01      | C8orf46      | 36.0241141  |
| 605 | 0.3600337 | 0.01      | SOWAHA       | 36.0033689  |
| 606 | 183.19225 | 5.1024771 | LOC100506844 | 35.90261002 |
| 607 | 0.3583826 | 0.01      | CCDC70       | 35.8382631  |
| 608 | 0.3580747 | 0.01      | S100Z        | 35.8074743  |
| 609 | 0.3562385 | 0.01      | MB           | 35.6238462  |
| 610 | 0.3556305 | 0.01      | MORN3        | 35.5630546  |
| 611 | 0.355176  | 0.01      | SGIP1        | 35.517597   |
| 612 | 18.202768 | 0.515248  | PLCB2        | 35.32816828 |
| 613 | 0.3529204 | 0.01      | GRIK2        | 35.2920407  |
| 614 | 0.3520262 | 0.01      | ARMC12       | 35.2026183  |
| 615 | 0.3502513 | 0.01      | KRT78        | 35.0251261  |
| 616 | 0.3502513 | 0.01      | LINC00331    | 35.0251261  |
| 617 | 0.3493705 | 0.01      | CEL          | 34.9370495  |
| 618 | 0.3490779 | 0.01      | CLEC1A       | 34.907789   |
| 619 | 0.3484941 | 0.01      | SLPI         | 34.8494147  |
| 620 | 0.3470433 | 0.01      | C6orf58      | 34.7043298  |
| 621 | 0.3470433 | 0.01      | SLC35G5      | 34.7043298  |
| 622 | 0.3461786 | 0.01      | VPREB3       | 34.6178572  |
| 623 | 0.3451593 | 0.01      | KLF8         | 34.5159275  |
| 624 | 0.3436667 | 0.01      | RAB7B        | 34.3666722  |
| 625 | 0.343327  | 0.01      | S100A1       | 34.3327018  |
| 626 | 0.3425745 | 0.01      | LOC388942    | 34.2574521  |
| 627 | 0.3421995 | 0.01      | LOC100506368 | 34.2199508  |
| 628 | 0.3405221 | 0.01      | LOC100129138 | 34.0522059  |
| 629 | 0.3383109 | 0.01      | HSPB9        | 33.8310877  |
| 630 | 0.3377626 | 0.01      | GBP1P1       | 33.7762561  |
| 631 | 0.3365806 | 0.01      | PCDHB7       | 33.6580619  |
| 632 | 1.8182507 | 0.0541068 | MEGF6        | 33.60484274 |
| 633 | 0.335317  | 0.01      | SPATA9       | 33.5316975  |
| 634 | 0.3345096 | 0.01      | SPANXN3      | 33.4509631  |
| 635 | 23.147513 | 0.6952323 | ALDH3B1      | 33.29464441 |
| 636 | 0.3329066 | 0.01      | IFLTD1       | 33.290655   |
| 637 | 0.3318463 | 0.01      | SLIT2-IT1    | 33.1846338  |
| 638 | 0.3313188 | 0.01      | BANF2        | 33.131876   |
| 639 | 0.3313188 | 0.01      | CETN4P       | 33.131876   |
| 640 | 0.8594901 | 0.025976  | PTGER3       | 33.08784556 |
| 641 | 837.19701 | 25.359227 | MYL9         | 33.01350587 |
| 642 | 0.3292251 | 0.01      | LOC388849    | 32.9225119  |
| 643 | 0.3292251 | 0.01      | NRN1L        | 32.9225119  |

|     |           |           |              |             |
|-----|-----------|-----------|--------------|-------------|
| 644 | 117.69546 | 3.582436  | COL5A1       | 32.85347316 |
| 645 | 0.3276722 | 0.01      | MGC39372     | 32.767217   |
| 646 | 185.20373 | 5.6783915 | UBE3B        | 32.61552661 |
| 647 | 0.3256242 | 0.01      | MAGO2        | 32.5624219  |
| 648 | 0.3252854 | 0.01      | VNN1         | 32.528538   |
| 649 | 0.3251162 | 0.01      | RPL23AP64    | 32.5116225  |
| 650 | 0.324231  | 0.01      | TEX22        | 32.4231039  |
| 651 | 212.45072 | 6.5684547 | TSPAN31      | 32.34409448 |
| 652 | 0.3228497 | 0.01      | LGALS4       | 32.2849729  |
| 653 | 0.3222257 | 0.01      | AGT          | 32.2225744  |
| 654 | 0.3221012 | 0.01      | CPSF4L       | 32.2101237  |
| 655 | 0.3211086 | 0.01      | CIDEC        | 32.1108629  |
| 656 | 0.3208614 | 0.01      | STEAP1B      | 32.0861432  |
| 657 | 1.4570105 | 0.0454551 | CCDC120      | 32.05385026 |
| 658 | 13.532435 | 0.4221781 | C10orf54     | 32.0538502  |
| 659 | 2.7738877 | 0.0865384 | ME3          | 32.05385018 |
| 660 | 0.3176822 | 0.01      | NME1-NME2    | 31.7682165  |
| 661 | 0.3148029 | 0.01      | PATE4        | 31.480287   |
| 662 | 0.3143281 | 0.01      | MEG9         | 31.4328055  |
| 663 | 0.3143281 | 0.01      | GUSBP5       | 31.4328055  |
| 664 | 10.61834  | 0.3385462 | ANGPTL2      | 31.36452008 |
| 665 | 0.3136185 | 0.01      | FAM71E1      | 31.361851   |
| 666 | 620.94545 | 19.800856 | MBD6         | 31.35952496 |
| 667 | 0.310928  | 0.01      | GRPR         | 31.0928012  |
| 668 | 5.2938061 | 0.1706586 | LOC100505817 | 31.01985512 |
| 669 | 3.812186  | 0.122895  | SOX30        | 31.01985499 |
| 670 | 0.3078279 | 0.01      | NLRC4        | 30.7827918  |
| 671 | 0.3072229 | 0.01      | ZNF525       | 30.722285   |
| 672 | 0.3067706 | 0.01      | HGFAC        | 30.6770609  |
| 673 | 0.3064699 | 0.01      | ZNF501       | 30.6469853  |
| 674 | 0.3053473 | 0.01      | LILRA5       | 30.5347253  |
| 675 | 20.206924 | 0.6634824 | CPM          | 30.45585768 |
| 676 | 0.3027596 | 0.01      | MATN1-AS1    | 30.2759564  |
| 677 | 0.3023569 | 0.01      | ADAP2        | 30.235691   |
| 678 | 16.077756 | 0.5321005 | MX1          | 30.21563657 |
| 679 | 162.45628 | 5.3780239 | TAGLN        | 30.20743028 |
| 680 | 0.3012424 | 0.01      | PLEKHS1      | 30.1242411  |
| 681 | 0.3002875 | 0.01      | CST2         | 30.0287464  |
| 682 | 8.7041558 | 0.2902753 | PYROXD2      | 29.98585988 |
| 683 | 8.0473842 | 0.2683726 | TP53TG1      | 29.98585985 |
| 684 | 422.9303  | 14.106477 | PIP4K2C      | 29.98128468 |
| 685 | 54.362687 | 1.8147846 | FOSB         | 29.95544826 |
| 686 | 0.2985666 | 0.01      | CHRNA1       | 29.8566619  |



|     |           |           |              |             |
|-----|-----------|-----------|--------------|-------------|
| 687 | 18.067145 | 0.6067063 | CD14         | 29.77906086 |
| 688 | 0.2972889 | 0.01      | TMEM239      | 29.7288873  |
| 689 | 34.156765 | 1.1499099 | CPQ          | 29.70386121 |
| 690 | 80.926709 | 2.728228  | XRCC6BP1     | 29.6627364  |
| 691 | 0.2964431 | 0.01      | FAM27A       | 29.6443101  |
| 692 | 54.496892 | 1.8409309 | LBH          | 29.60289871 |
| 693 | 0.2935204 | 0.01      | S100A5       | 29.3520423  |
| 694 | 0.2931076 | 0.01      | ZNF630       | 29.3107595  |
| 695 | 0.2920124 | 0.01      | CFL1P1       | 29.2012378  |
| 696 | 12.464566 | 0.4277496 | ABCC3        | 29.13986387 |
| 697 | 1.9360272 | 0.0668706 | ZNF558       | 28.95186478 |
| 698 | 8.3568722 | 0.2886471 | PCDHB14      | 28.95186469 |
| 699 | 4.7986727 | 0.1657466 | SOCS1        | 28.95186469 |
| 700 | 0.2894438 | 0.01      | XAGE2        | 28.944375   |
| 701 | 0.2874476 | 0.01      | AMBP         | 28.7447586  |
| 702 | 0.2867883 | 0.01      | ZNF280A      | 28.6788303  |
| 703 | 0.2866568 | 0.01      | LOC158696    | 28.6656809  |
| 704 | 106.7495  | 3.7262788 | HLA-H        | 28.6477485  |
| 705 | 0.2854788 | 0.01      | RAX2         | 28.5478767  |
| 706 | 11.417571 | 0.4008908 | DYX1C1       | 28.4805014  |
| 707 | 0.283344  | 0.01      | FAM170A      | 28.3343984  |
| 708 | 0.283344  | 0.01      | TEKT4        | 28.3343984  |
| 709 | 19.052445 | 0.6728613 | C16orf62     | 28.31556002 |
| 710 | 0.2827673 | 0.01      | CACNA1C-AS4  | 28.27673    |
| 711 | 0.2823841 | 0.01      | PPIAL4G      | 28.2384147  |
| 712 | 0.2819067 | 0.01      | ZNF80        | 28.1906662  |
| 713 | 111.39219 | 3.9748415 | BCAM         | 28.02431022 |
| 714 | 2.9444199 | 0.1054672 | OSR1         | 27.91786945 |
| 715 | 0.2791688 | 0.01      | REN          | 27.9168788  |
| 716 | 0.2789819 | 0.01      | LOC100289473 | 27.8981928  |
| 717 | 0.277127  | 0.01      | LOC730102    | 27.7126995  |
| 718 | 0.277127  | 0.01      | TUBB8        | 27.7126995  |
| 719 | 3.28613   | 0.1185855 | MAGI2-AS3    | 27.71107042 |
| 720 | 3.2961931 | 0.1191709 | ITI5         | 27.65937075 |
| 721 | 0.2761303 | 0.01      | CCDC170      | 27.6130324  |
| 722 | 0.2756607 | 0.01      | LINC00597    | 27.5660715  |
| 723 | 0.2751149 | 0.01      | FLJ12334     | 27.5114852  |
| 724 | 0.2743302 | 0.01      | SLC5A2       | 27.4330189  |
| 725 | 0.2734902 | 0.01      | SPRR2E       | 27.3490158  |
| 726 | 8.1742716 | 0.3007536 | GCNT2        | 27.17930155 |
| 727 | 0.2717073 | 0.01      | CD200        | 27.1707301  |
| 728 | 1.5263062 | 0.056774  | SOX2-OT      | 26.88387459 |
| 729 | 1.4871379 | 0.0553171 | KIF26B       | 26.88387446 |

|     |           |           |            |             |
|-----|-----------|-----------|------------|-------------|
| 730 | 1.2091915 | 0.0449783 | CD96       | 26.88387434 |
| 731 | 3.2925179 | 0.1224719 | MTAP       | 26.88387431 |
| 732 | 284.3385  | 10.626936 | DKK3       | 26.75639554 |
| 733 | 0.2664955 | 0.01      | LOC440356  | 26.6495525  |
| 734 | 7.2103287 | 0.2708066 | GRAMD3     | 26.62537561 |
| 735 | 0.2661552 | 0.01      | ZRANB2-AS2 | 26.6155173  |
| 736 | 0.2659288 | 0.01      | ZNF253     | 26.5928754  |
| 737 | 0.2655616 | 0.01      | SYCP2L     | 26.5561644  |
| 738 | 11.756163 | 0.4436937 | NTN4       | 26.49612617 |
| 739 | 45.57387  | 1.7202469 | ABLIM3     | 26.49263296 |
| 740 | 0.2637968 | 0.01      | CST5       | 26.3796836  |
| 741 | 0.2637968 | 0.01      | HIST1H1B   | 26.3796836  |
| 742 | 4.096502  | 0.1553655 | SEMA3C     | 26.36687683 |
| 743 | 1.897924  | 0.0719814 | EGF        | 26.36687678 |
| 744 | 13.479457 | 0.5145902 | PARP10     | 26.19454427 |
| 745 | 0.2614799 | 0.01      | SMIM18     | 26.1479925  |
| 746 | 206.86551 | 7.9572557 | MDM2       | 25.99709209 |
| 747 | 1717.3768 | 66.197332 | MARS       | 25.9432931  |
| 748 | 0.2593647 | 0.01      | SOWAHD     | 25.9364655  |
| 749 | 0.2593647 | 0.01      | TRIM61     | 25.9364655  |
| 750 | 0.258801  | 0.01      | LINC00514  | 25.8800994  |
| 751 | 0.2587742 | 0.01      | TACR2      | 25.8774214  |
| 752 | 3.5298018 | 0.13655   | RRAD       | 25.8498792  |
| 753 | 0.2582931 | 0.01      | SLC6A15    | 25.8293121  |
| 754 | 0.2563339 | 0.01      | RNF112     | 25.6333949  |
| 755 | 0.2563339 | 0.01      | CLIC3      | 25.6333949  |
| 756 | 0.2563339 | 0.01      | CCL3       | 25.6333949  |
| 757 | 0.2563339 | 0.01      | UPK1A-AS1  | 25.6333949  |
| 758 | 0.2548983 | 0.01      | EPPK1      | 25.489832   |
| 759 | 0.2547671 | 0.01      | NMU        | 25.4767115  |
| 760 | 0.2538362 | 0.01      | LOC643723  | 25.3836176  |
| 761 | 127.97525 | 5.0445619 | SOX18      | 25.36895122 |
| 762 | 0.252147  | 0.01      | SLC9A7P1   | 25.2147006  |
| 763 | 0.2500294 | 0.01      | CFHR3      | 25.0029394  |
| 764 | 0.2488848 | 0.01      | C14orf105  | 24.8884753  |
| 765 | 1.0496512 | 0.0422976 | PCDHGB7    | 24.81588434 |
| 766 | 1.8704518 | 0.0753732 | ZNF415     | 24.8158842  |
| 767 | 3.6086494 | 0.1454169 | FAM228B    | 24.81588407 |
| 768 | 1.5417965 | 0.0621294 | ZNF425     | 24.81588392 |
| 769 | 0.2476034 | 0.01      | C2orf54    | 24.7603367  |
| 770 | 0.2472117 | 0.01      | LSMEM1     | 24.7211744  |
| 771 | 0.2469188 | 0.01      | KRT36      | 24.6918839  |
| 772 | 0.2464322 | 0.01      | KCNJ6      | 24.6432204  |

|     |           |           |             |             |
|-----|-----------|-----------|-------------|-------------|
| 773 | 0.2463351 | 0.01      | C4orf51     | 24.6335107  |
| 774 | 0.2448878 | 0.01      | C9orf135    | 24.4887779  |
| 775 | 0.2444569 | 0.01      | LOC145837   | 24.4456892  |
| 776 | 0.2443136 | 0.01      | TAS1R3      | 24.4313599  |
| 777 | 0.2442182 | 0.01      | C6orf25     | 24.4218164  |
| 778 | 0.2433152 | 0.01      | SPANXA2-OT1 | 24.3315237  |
| 779 | 0.2431733 | 0.01      | SIGLEC16    | 24.3173279  |
| 780 | 34.548063 | 1.4244547 | PTCH1       | 24.2535358  |
| 781 | 13.866887 | 0.5747562 | NGF         | 24.12655393 |
| 782 | 0.2412031 | 0.01      | LINC00639   | 24.1203125  |
| 783 | 0.2406461 | 0.01      | LOC728606   | 24.0646074  |
| 784 | 0.2403685 | 0.01      | FAM71F1     | 24.0368512  |
| 785 | 0.2400916 | 0.01      | SIRPD       | 24.009159   |
| 786 | 0.2398153 | 0.01      | LOC440900   | 23.9815305  |
| 787 | 0.2398153 | 0.01      | RDH16       | 23.9815305  |
| 788 | 7.6150185 | 0.3178988 | SBSPON      | 23.95422137 |
| 789 | 0.2392646 | 0.01      | PLN         | 23.9264639  |
| 790 | 0.239196  | 0.01      | PCDHB13     | 23.9195983  |
| 791 | 0.238307  | 0.01      | LOC285548   | 23.8307033  |
| 792 | 0.2381709 | 0.01      | TMEM150B    | 23.8170857  |
| 793 | 0.2368176 | 0.01      | LINC00161   | 23.6817614  |
| 794 | 0.2368176 | 0.01      | LYG2        | 23.6817614  |
| 795 | 0.236013  | 0.01      | P2RY6       | 23.6013024  |
| 796 | 0.235746  | 0.01      | OCLM        | 23.5746041  |
| 797 | 0.2354797 | 0.01      | THRB-AS1    | 23.5479661  |
| 798 | 16.547108 | 0.7029777 | SLIT3       | 23.53859589 |
| 799 | 0.2352139 | 0.01      | LYZL4       | 23.5213883  |
| 800 | 0.2349487 | 0.01      | ARHGAP15    | 23.4948704  |
| 801 | 0.2346841 | 0.01      | HSPA6       | 23.4684122  |
| 802 | 0.2346841 | 0.01      | RPS4Y2      | 23.4684122  |
| 803 | 0.2346064 | 0.01      | CACNA1E     | 23.4606417  |
| 804 | 142.35396 | 6.0768195 | 9-Mar       | 23.42573498 |
| 805 | 290.84326 | 12.437018 | MMP2        | 23.385288   |
| 806 | 0.2337191 | 0.01      | TNFSF13B    | 23.3719066  |
| 807 | 0.2330569 | 0.01      | SPATA31E1   | 23.3056923  |
| 808 | 7.1342545 | 0.3066532 | SLC16A4     | 23.26489128 |
| 809 | 0.2325887 | 0.01      | C10orf11    | 23.2588728  |
| 810 | 0.232459  | 0.01      | LINC00466   | 23.2459007  |
| 811 | 0.2324331 | 0.01      | ECT2L       | 23.2433081  |
| 812 | 0.2307857 | 0.01      | ZG16        | 23.0785714  |
| 813 | 0.2302757 | 0.01      | EPHX3       | 23.0275691  |
| 814 | 90.856629 | 3.9533812 | CREB3L1     | 22.98200582 |
| 815 | 0.2282579 | 0.01      | MC2R        | 22.8257941  |

|     |           |           |             |             |
|-----|-----------|-----------|-------------|-------------|
| 816 | 1.3884885 | 0.0610381 | NPAS4       | 22.74789386 |
| 817 | 6.1831275 | 0.271811  | TPTEP1      | 22.74789374 |
| 818 | 1.5578624 | 0.0684838 | ENPP5       | 22.74789374 |
| 819 | 3.7641946 | 0.1654744 | APOL3       | 22.7478937  |
| 820 | 0.2260298 | 0.01      | IL36B       | 22.6029827  |
| 821 | 0.2245684 | 0.01      | C19orf18    | 22.4568427  |
| 822 | 0.2245684 | 0.01      | KLRC4       | 22.4568427  |
| 823 | 0.2244878 | 0.01      | OR51E2      | 22.4487792  |
| 824 | 0.2244072 | 0.01      | ZNF563      | 22.4407215  |
| 825 | 0.2237647 | 0.01      | RASA4B      | 22.3764674  |
| 826 | 0.2231258 | 0.01      | ZNF404      | 22.3125803  |
| 827 | 0.223078  | 0.01      | SLC7A11-AS1 | 22.3078035  |
| 828 | 4.9839702 | 0.2241912 | PRR16       | 22.23089609 |
| 829 | 0.2219377 | 0.01      | APOC1P1     | 22.19377    |
| 830 | 0.2212309 | 0.01      | OR2B6       | 22.1230892  |
| 831 | 245.55115 | 11.129893 | APPL2       | 22.06230996 |
| 832 | 0.2205286 | 0.01      | OR10A3      | 22.0528572  |
| 833 | 0.2201791 | 0.01      | H2BFM       | 22.0179081  |
| 834 | 0.2200628 | 0.01      | UPK2        | 22.006283   |
| 835 | 5.575687  | 0.2537587 | VSTM4       | 21.9723973  |
| 836 | 0.2194603 | 0.01      | ANKRD62     | 21.9460299  |
| 837 | 0.2186773 | 0.01      | MGC45922    | 21.8677335  |
| 838 | 0.2185245 | 0.01      | NALCN-AS1   | 21.8524467  |
| 839 | 0.2184481 | 0.01      | C4orf22     | 21.8448113  |
| 840 | 0.2179911 | 0.01      | KRTCAP3     | 21.7991109  |
| 841 | 40.139253 | 1.8438053 | NOTCH3      | 21.76979016 |
| 842 | 0.2172525 | 0.01      | NBPF16      | 21.7252541  |
| 843 | 1.2736873 | 0.0586577 | GCNT4       | 21.71389857 |
| 844 | 1.8686548 | 0.086058  | FZD9        | 21.71389848 |
| 845 | 0.2166315 | 0.01      | GNG3        | 21.6631497  |
| 846 | 0.2164065 | 0.01      | LRRC38      | 21.6406542  |
| 847 | 0.2152887 | 0.01      | RBP5        | 21.528874   |
| 848 | 0.2151221 | 0.01      | SELE        | 21.5122065  |
| 849 | 0.214491  | 0.01      | FYB         | 21.4491046  |
| 850 | 0.2144028 | 0.01      | ALDH3A1     | 21.4402778  |
| 851 | 3.5516133 | 0.1662022 | XAF1        | 21.36923347 |
| 852 | 0.2134147 | 0.01      | MAGEB10     | 21.3414747  |
| 853 | 1.9977506 | 0.0942473 | TLR5        | 21.196901   |
| 854 | 35.571938 | 1.6781669 | IL6         | 21.19690095 |
| 855 | 0.2117881 | 0.01      | TBC1D10C    | 21.178811   |
| 856 | 125.00799 | 5.903075  | ASB8        | 21.17675819 |
| 857 | 0.2105045 | 0.01      | GFRA3       | 21.0504546  |
| 858 | 7.8037873 | 0.3711747 | SERPINA3    | 21.02456845 |

|     |           |           |              |             |
|-----|-----------|-----------|--------------|-------------|
| 859 | 4.8262603 | 0.2295534 | SLC8A3       | 21.0245684  |
| 860 | 0.2101861 | 0.01      | SPDYE2       | 21.0186082  |
| 861 | 0.2100801 | 0.01      | LOC100506241 | 21.0080141  |
| 862 | 0.2096574 | 0.01      | ACTG1P4      | 20.9657445  |
| 863 | 13.646208 | 0.6517311 | CCL5         | 20.93840218 |
| 864 | 40.511005 | 1.9357265 | RASL12       | 20.92806221 |
| 865 | 0.2079835 | 0.01      | BREA2        | 20.7983533  |
| 866 | 0.2075692 | 0.01      | MAGEC2       | 20.7569223  |
| 867 | 0.2073627 | 0.01      | ZNF702P      | 20.7362687  |
| 868 | 0.2070194 | 0.01      | ARHGAP25     | 20.7019371  |
| 869 | 1.3333301 | 0.0644747 | DNM3OS       | 20.67990342 |
| 870 | 4.2271704 | 0.2044096 | TIAM2        | 20.6799034  |
| 871 | 1.7973221 | 0.0869115 | ASMTL-AS1    | 20.67990335 |
| 872 | 0.2063361 | 0.01      | GDF9         | 20.6336139  |
| 873 | 10.738678 | 0.5224154 | TENM2        | 20.55582397 |
| 874 | 2045.307  | 99.676386 | CDK4         | 20.51947369 |
| 875 | 0.2051176 | 0.01      | AFP          | 20.5117618  |
| 876 | 0.2051176 | 0.01      | FGF20        | 20.5117618  |
| 877 | 0.2047146 | 0.01      | GGT3P        | 20.4714637  |
| 878 | 0.2045137 | 0.01      | RLN1         | 20.4513739  |
| 879 | 0.2041131 | 0.01      | TAS2R31      | 20.4113125  |
| 880 | 0.2037539 | 0.01      | MCMDC2       | 20.3753911  |
| 881 | 0.2037141 | 0.01      | MRAP         | 20.3714076  |
| 882 | 0.2034158 | 0.01      | LOC100272216 | 20.3415813  |
| 883 | 0.2032175 | 0.01      | GCGR         | 20.3217455  |
| 884 | 0.2024082 | 0.01      | PLB1         | 20.2408217  |
| 885 | 0.2022314 | 0.01      | MYOC         | 20.2231441  |
| 886 | 0.202068  | 0.01      | KCNJ15       | 20.2068035  |
| 887 | 0.2019375 | 0.01      | LOC440335    | 20.19375    |
| 888 | 0.2018397 | 0.01      | NHLRC4       | 20.183971   |
| 889 | 2.8378424 | 0.1407457 | KRT42P       | 20.16290583 |
| 890 | 0.2015469 | 0.01      | DKKL1        | 20.1546905  |
| 891 | 0.2014495 | 0.01      | LOC100132215 | 20.1449493  |
| 892 | 0.2011578 | 0.01      | FGF8         | 20.1157819  |
| 893 | 1431.409  | 71.453393 | HLA-A        | 20.03276501 |
| 894 | 5.0133434 | 0.2507854 | C1QTNF2      | 19.99057325 |
| 895 | 0.1998078 | 0.01      | HSD52        | 19.9807766  |
| 896 | 0.1988545 | 0.01      | BEST4        | 19.8854485  |
| 897 | 0.1982869 | 0.01      | CDRT15L2     | 19.828687   |
| 898 | 0.1981926 | 0.01      | PTGIR        | 19.8192582  |
| 899 | 0.1980984 | 0.01      | ST7-OT3      | 19.8098384  |
| 900 | 0.1980984 | 0.01      | LOC100507299 | 19.8098384  |
| 901 | 0.196789  | 0.01      | FCN3         | 19.6788952  |

|     |           |           |              |             |
|-----|-----------|-----------|--------------|-------------|
| 902 | 0.1966033 | 0.01      | AQP7P1       | 19.6603302  |
| 903 | 0.1965106 | 0.01      | PXT1         | 19.6510608  |
| 904 | 1.6161594 | 0.0822644 | TNIP3        | 19.6459083  |
| 905 | 2.5998624 | 0.1323361 | SIGLEC15     | 19.64590824 |
| 906 | 2.9894983 | 0.152169  | DDIT4L       | 19.64590821 |
| 907 | 183.94948 | 9.3632464 | SRGN         | 19.6459082  |
| 908 | 3.8554922 | 0.1962491 | RTP4         | 19.64590819 |
| 909 | 3.5676578 | 0.181598  | RUNX1T1      | 19.64590818 |
| 910 | 1.6287908 | 0.0829074 | GGT1         | 19.64590811 |
| 911 | 0.1959563 | 0.01      | C17orf47     | 19.5956277  |
| 912 | 0.1954051 | 0.01      | KCTD4        | 19.5405063  |
| 913 | 0.194584  | 0.01      | PYY2         | 19.4584034  |
| 914 | 0.1942213 | 0.01      | NINJ2        | 19.4221342  |
| 915 | 0.194161  | 0.01      | ADAM28       | 19.4161025  |
| 916 | 0.1940405 | 0.01      | GZMK         | 19.4040503  |
| 917 | 120.23357 | 6.2182136 | ARHGEF25     | 19.33570965 |
| 918 | 0.1931413 | 0.01      | CLEC4E       | 19.3141335  |
| 919 | 7.8800621 | 0.4082671 | EN1          | 19.30124316 |
| 920 | 5.5467548 | 0.2873781 | TCN2         | 19.30124315 |
| 921 | 0.1922505 | 0.01      | LOC100129480 | 19.2250461  |
| 922 | 0.1901455 | 0.01      | ZNF502       | 19.0145529  |
| 923 | 0.189684  | 0.01      | DENND2D      | 18.9684011  |
| 924 | 4.4599115 | 0.2352699 | FERMT3       | 18.95657813 |
| 925 | 0.1890531 | 0.01      | COL10A1      | 18.9053069  |
| 926 | 0.1889816 | 0.01      | GPR113       | 18.8981637  |
| 927 | 0.1889388 | 0.01      | GRIK1-AS1    | 18.8938803  |
| 928 | 0.1888532 | 0.01      | CCR7         | 18.8853195  |
| 929 | 0.1888532 | 0.01      | TMEM45B      | 18.8853195  |
| 930 | 6.7166285 | 0.3559344 | CEACAM19     | 18.87041182 |
| 931 | 0.1885542 | 0.01      | KIAA1683     | 18.8554173  |
| 932 | 0.1881711 | 0.01      | GIMAP1       | 18.8171106  |
| 933 | 0.1868216 | 0.01      | MSTO2P       | 18.6821605  |
| 934 | 0.1867379 | 0.01      | SPIC         | 18.6737903  |
| 935 | 0.1864038 | 0.01      | CRB3         | 18.6403846  |
| 936 | 0.1864038 | 0.01      | BET3L        | 18.6403846  |
| 937 | 0.1861264 | 0.01      | CLDN18       | 18.6126377  |
| 938 | 0.5194836 | 0.0279113 | PLCB1        | 18.61191333 |
| 939 | 12.690091 | 0.6818263 | GSTM2        | 18.61191303 |
| 940 | 6.5914444 | 0.3541519 | ERAP2        | 18.61191301 |
| 941 | 21.134656 | 1.1400686 | SLIT2        | 18.53805624 |
| 942 | 0.1850795 | 0.01      | CCDC116      | 18.5079485  |
| 943 | 163.55781 | 8.8465658 | EFEMP2       | 18.48828317 |
| 944 | 0.1842613 | 0.01      | LINC00619    | 18.4261273  |

|     |           |           |              |             |
|-----|-----------|-----------|--------------|-------------|
| 945 | 46.264689 | 2.5193481 | PCBP3        | 18.3637542  |
| 946 | 6.9906161 | 0.3826858 | HLA-J        | 18.26724796 |
| 947 | 0.1817966 | 0.01      | SLC36A2      | 18.1796598  |
| 948 | 0.1816118 | 0.01      | PCDHGB1      | 18.1611765  |
| 949 | 0.1816118 | 0.01      | NYAP2        | 18.1611765  |
| 950 | 0.1812564 | 0.01      | PCDHGB6      | 18.125636   |
| 951 | 1.8688144 | 0.1032784 | P2RX7        | 18.09491552 |
| 952 | 0.1804325 | 0.01      | TNFRSF6B     | 18.0432468  |
| 953 | 0.1791143 | 0.01      | KRT3         | 17.911431   |
| 954 | 0.1781954 | 0.01      | HAPLN1       | 17.8195383  |
| 955 | 0.1781192 | 0.01      | LOC388553    | 17.8119231  |
| 956 | 0.1776637 | 0.01      | HTR1B        | 17.7663683  |
| 957 | 0.1776132 | 0.01      | PVRL4        | 17.761321   |
| 958 | 0.1775124 | 0.01      | LOC100131434 | 17.7512351  |
| 959 | 0.1763109 | 0.01      | PROKR1       | 17.6310914  |
| 960 | 0.1763109 | 0.01      | RERGL        | 17.6310914  |
| 961 | 0.1760131 | 0.01      | C9orf24      | 17.6013091  |
| 962 | 35.357201 | 2.0114556 | LOC100505806 | 17.57791787 |
| 963 | 9.2501084 | 0.5262346 | EBI3         | 17.57791786 |
| 964 | 10.491979 | 0.596884  | MOXD1        | 17.57791785 |
| 965 | 2.6146063 | 0.1487438 | GBP5         | 17.57791782 |
| 966 | 0.828142  | 0.0471126 | ZNF287       | 17.57791776 |
| 967 | 0.1751992 | 0.01      | ZNF883       | 17.5199244  |
| 968 | 0.1748318 | 0.01      | MAP1LC3C     | 17.4831795  |
| 969 | 1.6571389 | 0.0949354 | OAS2         | 17.45543744 |
| 970 | 0.1741015 | 0.01      | LCE1B        | 17.4101504  |
| 971 | 0.1739562 | 0.01      | LOC100144602 | 17.3956177  |
| 972 | 1085.8849 | 62.650119 | HLA-C        | 17.33252752 |
| 973 | 0.1730893 | 0.01      | LINC00525    | 17.3089286  |
| 974 | 0.1723378 | 0.01      | C10orf105    | 17.2337813  |
| 975 | 0.172231  | 0.01      | C5orf60      | 17.2230992  |
| 976 | 261.81081 | 15.21986  | METTL1       | 17.20191962 |
| 977 | 0.1718523 | 0.01      | C6orf223     | 17.1852254  |
| 978 | 0.1715928 | 0.01      | FCGR2A       | 17.1592837  |
| 979 | 0.1715928 | 0.01      | CYP21A1P     | 17.1592837  |
| 980 | 10.123259 | 0.5908019 | CYP27A1      | 17.13477707 |
| 981 | 0.170261  | 0.01      | EGFL6        | 17.026103   |
| 982 | 0.1695683 | 0.01      | ZNF709       | 16.9568348  |
| 983 | 10.885638 | 0.6433623 | F2RL2        | 16.91992093 |
| 984 | 4.3086816 | 0.2551239 | HOTAIR       | 16.88858776 |
| 985 | 52.211597 | 3.0974115 | PAMR1        | 16.85652589 |
| 986 | 0.1677935 | 0.01      | CAPN9        | 16.7793478  |
| 987 | 0.1672548 | 0.01      | MMP23B       | 16.7254816  |

|      |           |           |              |             |
|------|-----------|-----------|--------------|-------------|
| 988  | 0.1672548 | 0.01      | PDC          | 16.7254816  |
| 989  | 0.1672548 | 0.01      | PRDM12       | 16.7254816  |
| 990  | 0.1671207 | 0.01      | CLDN14       | 16.712069   |
| 991  | 0.1664533 | 0.01      | IL20         | 16.6453275  |
| 992  | 0.1663536 | 0.01      | ZFP3         | 16.6353622  |
| 993  | 23.751414 | 1.429042  | TFAP2A       | 16.62051492 |
| 994  | 0.1660554 | 0.01      | HAVCR1P1     | 16.6055379  |
| 995  | 0.1656594 | 0.01      | AQP7         | 16.565938   |
| 996  | 1.3795581 | 0.0833876 | IL4I1        | 16.54392278 |
| 997  | 1.2200483 | 0.073746  | PCDHB2       | 16.54392263 |
| 998  | 0.1650036 | 0.01      | CD37         | 16.5003563  |
| 999  | 0.1645476 | 0.01      | SIX3         | 16.4547572  |
| 1000 | 0.1642234 | 0.01      | LINC00310    | 16.4223404  |
| 1001 | 9.1072223 | 0.5554468 | RGS9         | 16.3962091  |
| 1002 | 452.45608 | 27.683825 | CTDSP2       | 16.3436982  |
| 1003 | 0.1633225 | 0.01      | CYP4A11      | 16.3322492  |
| 1004 | 0.1633225 | 0.01      | GSTA1        | 16.3322492  |
| 1005 | 0.1622417 | 0.01      | SLA2         | 16.2241728  |
| 1006 | 4.8754487 | 0.3009674 | EVI2B        | 16.19925766 |
| 1007 | 2.853748  | 0.1761654 | CACNA1C      | 16.19925759 |
| 1008 | 0.1619266 | 0.01      | LOC100506801 | 16.1926574  |
| 1009 | 0.1609263 | 0.01      | HYPK         | 16.0926255  |
| 1010 | 0.1606781 | 0.01      | SPATA32      | 16.0678103  |
| 1011 | 0.1606162 | 0.01      | LOC100287639 | 16.0616185  |
| 1012 | 0.1603073 | 0.01      | H1FNT        | 16.0307308  |
| 1013 | 1.3920242 | 0.0868554 | GALNT15      | 16.02692516 |
| 1014 | 2.3172111 | 0.1445824 | CCDC81       | 16.02692508 |
| 1015 | 1.8445066 | 0.115088  | PDE5A        | 16.02692507 |
| 1016 | 0.1598156 | 0.01      | RPE65        | 15.9815568  |
| 1017 | 10.16905  | 0.638618  | HLA-G        | 15.9235256  |
| 1018 | 11.274759 | 0.7100327 | ARID5B       | 15.87921153 |
| 1019 | 71.109794 | 4.478841  | PLA2G16      | 15.87682904 |
| 1020 | 0.1587201 | 0.01      | CSNK1G2-AS1  | 15.8720107  |
| 1021 | 2.5003592 | 0.1577057 | TSLP         | 15.85459255 |
| 1022 | 0.158118  | 0.01      | LOC286059    | 15.8117982  |
| 1023 | 0.1579382 | 0.01      | ZNF763       | 15.7938234  |
| 1024 | 0.1576396 | 0.01      | STMND1       | 15.7639561  |
| 1025 | 4.1455977 | 0.2633847 | MAF          | 15.73970425 |
| 1026 | 0.1569273 | 0.01      | WDR38        | 15.6927334  |
| 1027 | 185.99308 | 11.889597 | TSMF         | 15.64334626 |
| 1028 | 19.060075 | 1.2198592 | RBP1         | 15.62481588 |
| 1029 | 0.1557545 | 0.01      | PCDHA4       | 15.5754484  |
| 1030 | 0.1553288 | 0.01      | ZNF658       | 15.532882   |



|      |           |           |              |             |
|------|-----------|-----------|--------------|-------------|
| 1031 | 0.1552902 | 0.01      | CPA2         | 15.5290239  |
| 1032 | 0.4996791 | 0.0322167 | PPL          | 15.50992775 |
| 1033 | 1.0525227 | 0.0678612 | INSC         | 15.50992752 |
| 1034 | 3.9531995 | 0.2548819 | AVIL         | 15.50992751 |
| 1035 | 1.0960703 | 0.070669  | BEST1        | 15.50992744 |
| 1036 | 0.1550592 | 0.01      | SYS1-DBNDD2  | 15.5059152  |
| 1037 | 0.154599  | 0.01      | SULT1A2      | 15.4599036  |
| 1038 | 0.15437   | 0.01      | ANXA2P3      | 15.437      |
| 1039 | 0.1542557 | 0.01      | CCL8         | 15.4255737  |
| 1040 | 0.1542557 | 0.01      | CLIC2        | 15.4255737  |
| 1041 | 0.1542557 | 0.01      | LOC100128593 | 15.4255737  |
| 1042 | 0.153914  | 0.01      | RAB40A       | 15.3913959  |
| 1043 | 0.153914  | 0.01      | NMBR         | 15.3913959  |
| 1044 | 4.8177329 | 0.3148201 | EPSTI1       | 15.30312849 |
| 1045 | 0.1522275 | 0.01      | FGFBP1       | 15.2227538  |
| 1046 | 0.1522275 | 0.01      | SMIM21       | 15.2227538  |
| 1047 | 0.1520609 | 0.01      | GCK          | 15.2060927  |
| 1048 | 0.1516736 | 0.01      | GHRL         | 15.1673581  |
| 1049 | 0.1513431 | 0.01      | SPANXN2      | 15.1343137  |
| 1050 | 14.217342 | 0.9401649 | NAPRT1       | 15.12217933 |
| 1051 | 0.1508684 | 0.01      | ZNF585A      | 15.0868364  |
| 1052 | 36.465102 | 2.4193186 | CYGB         | 15.07246803 |
| 1053 | 0.150252  | 0.01      | ZNF835       | 15.0251983  |
| 1054 | 35.395854 | 2.3565594 | PHLDA3       | 15.02014034 |
| 1055 | 2.3598538 | 0.1573978 | FKBP9L       | 14.99292995 |
| 1056 | 8.004749  | 0.5339016 | LIN7B        | 14.99292994 |
| 1057 | 18.934183 | 1.2738556 | NID2         | 14.86368055 |
| 1058 | 0.1485385 | 0.01      | ZNF233       | 14.8538489  |
| 1059 | 0.148327  | 0.01      | PPP1R36      | 14.8327046  |
| 1060 | 54.978198 | 3.7115878 | ADAMTS1      | 14.81258195 |
| 1061 | 0.148011  | 0.01      | AKR1C6P      | 14.8011009  |
| 1062 | 6.2049538 | 0.4204488 | COL15A1      | 14.75793106 |
| 1063 | 0.147383  | 0.01      | NR1I3        | 14.7382956  |
| 1064 | 7.5372916 | 0.5115428 | PIR          | 14.73443116 |
| 1065 | 113.36841 | 7.6960716 | FADS3        | 14.7306848  |
| 1066 | 0.1472788 | 0.01      | LINC00856    | 14.7278799  |
| 1067 | 0.1470709 | 0.01      | ZNF844       | 14.7070925  |
| 1068 | 0.147019  | 0.01      | HEXA-AS1     | 14.7019048  |
| 1069 | 0.1469672 | 0.01      | LOC255130    | 14.6967207  |
| 1070 | 0.1458359 | 0.01      | RSPH4A       | 14.5835899  |
| 1071 | 0.1455304 | 0.01      | FRK          | 14.5530377  |
| 1072 | 0.1454627 | 0.01      | GRIN2C       | 14.5462657  |
| 1073 | 0.1452261 | 0.01      | RNF126P1     | 14.5226133  |

|      |           |           |              |             |
|------|-----------|-----------|--------------|-------------|
| 1074 | 0.1451587 | 0.01      | LOC643201    | 14.5158695  |
| 1075 | 0.145024  | 0.01      | SPTY2D1-AS1  | 14.5024008  |
| 1076 | 0.1449232 | 0.01      | APOL5        | 14.4923157  |
| 1077 | 1.2909704 | 0.0891805 | DSCR6        | 14.47593241 |
| 1078 | 1.5899689 | 0.1098353 | LGALS9       | 14.47593237 |
| 1079 | 3.149048  | 0.2175368 | MUC1         | 14.47593237 |
| 1080 | 0.4555892 | 0.0314722 | ZNF117       | 14.47593235 |
| 1081 | 1.7032067 | 0.1176578 | IL3RA        | 14.47593234 |
| 1082 | 0.7131736 | 0.0492662 | ERCC5        | 14.47593227 |
| 1083 | 0.7283058 | 0.0503115 | CSF1R        | 14.47593223 |
| 1084 | 0.1447219 | 0.01      | HPCA         | 14.4721875  |
| 1085 | 0.1446214 | 0.01      | SGCA         | 14.4621444  |
| 1086 | 0.1442211 | 0.01      | LOC400456    | 14.4221107  |
| 1087 | 18.318047 | 1.2759299 | CTSS         | 14.35662523 |
| 1088 | 0.1431807 | 0.01      | KCTD19       | 14.3180694  |
| 1089 | 16.005214 | 1.1228292 | MEST         | 14.25436197 |
| 1090 | 0.1422522 | 0.01      | BTBD8        | 14.2252219  |
| 1091 | 64.942421 | 4.5870483 | METTTL21B    | 14.15778    |
| 1092 | 0.1414796 | 0.01      | ZACN         | 14.1479634  |
| 1093 | 0.1411921 | 0.01      | NXNL2        | 14.1192073  |
| 1094 | 0.1404309 | 0.01      | IL1R2        | 14.043093   |
| 1095 | 0.1403364 | 0.01      | LINC00482    | 14.0336364  |
| 1096 | 0.1403364 | 0.01      | AIM2         | 14.0336364  |
| 1097 | 30.272099 | 2.15724   | CCDC80       | 14.03279157 |
| 1098 | 15.826168 | 1.1291196 | PBXIP1       | 14.01637895 |
| 1099 | 0.1400534 | 0.01      | CASP5        | 14.0053428  |
| 1100 | 0.1393977 | 0.01      | NOD2         | 13.9397659  |
| 1101 | 0.1392114 | 0.01      | CCL16        | 13.9211423  |
| 1102 | 0.1388404 | 0.01      | FTLP10       | 13.884044   |
| 1103 | 3.4659964 | 0.2501525 | FAT4         | 13.85553524 |
| 1104 | 0.1381044 | 0.01      | ATP4B        | 13.8104374  |
| 1105 | 0.1381044 | 0.01      | LINC00518    | 13.8104374  |
| 1106 | 0.1375574 | 0.01      | PCDHB6       | 13.7557426  |
| 1107 | 0.1371049 | 0.01      | TMEM56-RWDD3 | 13.7104934  |
| 1108 | 0.1370148 | 0.01      | TOP1P2       | 13.7014793  |
| 1109 | 0.1370148 | 0.01      | GPR87        | 13.7014793  |
| 1110 | 0.1369248 | 0.01      | HPGD         | 13.692477   |
| 1111 | 0.1366554 | 0.01      | GPR84        | 13.665541   |
| 1112 | 0.1361643 | 0.01      | BTBD18       | 13.6164325  |
| 1113 | 21.492899 | 1.5787038 | HSBP1L1      | 13.61426971 |
| 1114 | 0.1357651 | 0.01      | PCDHGA7      | 13.5765147  |
| 1115 | 0.1357651 | 0.01      | KCNE3        | 13.5765147  |
| 1116 | 0.1355885 | 0.01      | TICAM2       | 13.5588484  |

|      |           |           |           |             |
|------|-----------|-----------|-----------|-------------|
| 1117 | 0.1354563 | 0.01      | NEBL      | 13.5456289  |
| 1118 | 0.1354563 | 0.01      | MOBP      | 13.5456289  |
| 1119 | 0.1352365 | 0.01      | SYNE4     | 13.5236535  |
| 1120 | 0.1350612 | 0.01      | ADIPOQ    | 13.5061244  |
| 1121 | 0.1350612 | 0.01      | LAMB2P1   | 13.5061244  |
| 1122 | 0.1349738 | 0.01      | FKBP6     | 13.497377   |
| 1123 | 0.1347992 | 0.01      | LOC158376 | 13.4799159  |
| 1124 | 0.5581363 | 0.041522  | FAM198B   | 13.44193725 |
| 1125 | 1.6764811 | 0.1247202 | TEKT4P2   | 13.44193724 |
| 1126 | 4.551081  | 0.3385733 | SERPINB9  | 13.4419372  |
| 1127 | 0.735195  | 0.0546941 | KLHL30    | 13.4419372  |
| 1128 | 0.5861518 | 0.0436062 | LOC284837 | 13.4419372  |
| 1129 | 2.0594401 | 0.1532101 | DHX58     | 13.4419372  |
| 1130 | 26.672791 | 1.9842967 | EMID1     | 13.44193719 |
| 1131 | 1.7550379 | 0.1305644 | IFIT1     | 13.44193718 |
| 1132 | 0.1341052 | 0.01      | TUBA3E    | 13.4105212  |
| 1133 | 0.1341052 | 0.01      | FAS-AS1   | 13.4105212  |
| 1134 | 181.02262 | 13.508569 | CARS2     | 13.40057738 |
| 1135 | 0.133718  | 0.01      | LOC645752 | 13.3717998  |
| 1136 | 291.5901  | 21.818441 | SELM      | 13.36438755 |
| 1137 | 0.1332904 | 0.01      | HRASLS5   | 13.3290374  |
| 1138 | 5.3824344 | 0.4043086 | ABCB4     | 13.3126878  |
| 1139 | 0.1331201 | 0.01      | KLF17     | 13.312009   |
| 1140 | 0.1330776 | 0.01      | NKAIN3    | 13.3077586  |
| 1141 | 0.1329078 | 0.01      | FAM110D   | 13.2907844  |
| 1142 | 0.1322332 | 0.01      | PATE1     | 13.2233185  |
| 1143 | 0.131982  | 0.01      | TP53AIP1  | 13.1981951  |
| 1144 | 0.1312339 | 0.01      | FXD3      | 13.1233942  |
| 1145 | 7.0527057 | 0.5384866 | MR1       | 13.09727212 |
| 1146 | 62.813872 | 4.8081958 | FBN1      | 13.06391745 |
| 1147 | 0.1303311 | 0.01      | ITIH2     | 13.0331145  |
| 1148 | 0.1303311 | 0.01      | ST13P4    | 13.0331145  |
| 1149 | 0.1302497 | 0.01      | TEX101    | 13.0249688  |
| 1150 | 19.869075 | 1.5285319 | COPZ2     | 12.9987964  |
| 1151 | 0.1299249 | 0.01      | C1orf101  | 12.9924875  |
| 1152 | 0.1299249 | 0.01      | C20orf202 | 12.9924875  |
| 1153 | 18.355959 | 1.4131313 | SECTM1    | 12.98956431 |
| 1154 | 0.1298439 | 0.01      | ZNF860    | 12.9843925  |
| 1155 | 34.83018  | 2.6873046 | GNAZ      | 12.9610092  |
| 1156 | 0.1292801 | 0.01      | PSG2      | 12.9280087  |
| 1157 | 4.228886  | 0.3271881 | GBP4      | 12.92493959 |
| 1158 | 48.517026 | 3.7591615 | LRP1      | 12.90634257 |
| 1159 | 6.5188504 | 0.5066138 | PITPNM3   | 12.86749543 |

|      |           |           |              |             |
|------|-----------|-----------|--------------|-------------|
| 1160 | 0.1283248 | 0.01      | C9orf50      | 12.8324815  |
| 1161 | 0.1282458 | 0.01      | ATP6V1C2     | 12.8245846  |
| 1162 | 0.1282458 | 0.01      | TMPRSS2      | 12.8245846  |
| 1163 | 3.9153845 | 0.3053755 | CD22         | 12.82154009 |
| 1164 | 0.128167  | 0.01      | KRT33B       | 12.8166974  |
| 1165 | 26.002139 | 2.0339691 | SERPINB2     | 12.78394026 |
| 1166 | 0.1265328 | 0.01      | FAM183B      | 12.6532787  |
| 1167 | 2.3493568 | 0.186239  | QRICH2       | 12.61474107 |
| 1168 | 84.389912 | 6.7054892 | CDKN2C       | 12.58519834 |
| 1169 | 0.1248649 | 0.01      | PSG5         | 12.4864889  |
| 1170 | 0.1243434 | 0.01      | CD69         | 12.4343377  |
| 1171 | 0.2831194 | 0.0228176 | VWF          | 12.40794228 |
| 1172 | 0.4961893 | 0.0399897 | LPPR4        | 12.40794208 |
| 1173 | 1.2598458 | 0.1015354 | C3AR1        | 12.40794207 |
| 1174 | 3.3718571 | 0.2717499 | TRAF1        | 12.40794203 |
| 1175 | 0.8686329 | 0.0700062 | C1orf213     | 12.40794203 |
| 1176 | 4.2512435 | 0.3426228 | ZNF423       | 12.40794201 |
| 1177 | 0.6356873 | 0.0512323 | PABPC1P2     | 12.40794194 |
| 1178 | 0.1239735 | 0.01      | DSCR9        | 12.3973528  |
| 1179 | 0.1236059 | 0.01      | TNF          | 12.3605872  |
| 1180 | 0.1229496 | 0.01      | LOC731424    | 12.2949558  |
| 1181 | 0.1229496 | 0.01      | ZNF157       | 12.2949558  |
| 1182 | 0.1227323 | 0.01      | C1orf228     | 12.2732332  |
| 1183 | 0.1226601 | 0.01      | SNX15        | 12.2660094  |
| 1184 | 0.1224439 | 0.01      | TMLHE-AS1    | 12.244389   |
| 1185 | 0.1224439 | 0.01      | TMSB4Y       | 12.244389   |
| 1186 | 0.1220138 | 0.01      | COLEC10      | 12.2013759  |
| 1187 | 0.1220138 | 0.01      | ABHD12B      | 12.2013759  |
| 1188 | 0.1219424 | 0.01      | C19orf45     | 12.1942364  |
| 1189 | 0.1215157 | 0.01      | PPEF2        | 12.1515744  |
| 1190 | 0.1213742 | 0.01      | CETP         | 12.1374199  |
| 1191 | 24.926783 | 2.0556572 | SH2B2        | 12.12594334 |
| 1192 | 0.1210218 | 0.01      | LEP          | 12.1021777  |
| 1193 | 17.480345 | 1.4454632 | FOXL1        | 12.09324784 |
| 1194 | 0.1208113 | 0.01      | AADAC        | 12.0811304  |
| 1195 | 117.14022 | 9.7131493 | FOS          | 12.05996288 |
| 1196 | 10.168496 | 0.8459511 | GLT8D2       | 12.02019383 |
| 1197 | 0.1197698 | 0.01      | ELN          | 11.9769828  |
| 1198 | 1.29799   | 0.108484  | NRXN3        | 11.96480126 |
| 1199 | 0.1195637 | 0.01      | LGALS9C      | 11.9563683  |
| 1200 | 0.1195637 | 0.01      | SVOP         | 11.9563683  |
| 1201 | 0.1193582 | 0.01      | LOC100130950 | 11.9358248  |
| 1202 | 0.1193241 | 0.01      | TNFSF4       | 11.9324077  |

|      |           |           |              |             |
|------|-----------|-----------|--------------|-------------|
| 1203 | 0.5571208 | 0.0468525 | ABCA13       | 11.89094455 |
| 1204 | 0.1185435 | 0.01      | YBX3P1       | 11.8543515  |
| 1205 | 84.826623 | 7.1599003 | CLU          | 11.84745866 |
| 1206 | 9.7216308 | 0.8211361 | IL1R1        | 11.83924468 |
| 1207 | 4.9607461 | 0.4192121 | LRRC32       | 11.83350027 |
| 1208 | 34.061935 | 2.879255  | C12orf68     | 11.83012119 |
| 1209 | 0.1182744 | 0.01      | ZNF878       | 11.8274404  |
| 1210 | 0.1180734 | 0.01      | LHFPL1       | 11.8073371  |
| 1211 | 0.1178064 | 0.01      | ADORA2A-AS1  | 11.7806388  |
| 1212 | 0.1176733 | 0.01      | ANAPC1P1     | 11.7673348  |
| 1213 | 0.1176733 | 0.01      | A4GNT        | 11.7673348  |
| 1214 | 0.1176733 | 0.01      | TRIM63       | 11.7673348  |
| 1215 | 0.1175406 | 0.01      | LDHAL6B      | 11.7540609  |
| 1216 | 0.1174744 | 0.01      | KYNU         | 11.7474352  |
| 1217 | 0.1173751 | 0.01      | GTF2IRD2     | 11.7375106  |
| 1218 | 0.1172101 | 0.01      | NXPE2        | 11.7210068  |
| 1219 | 5.1348854 | 0.4391757 | TGFB2        | 11.69209922 |
| 1220 | 0.1168486 | 0.01      | DNM1P35      | 11.6848612  |
| 1221 | 0.1166851 | 0.01      | WASH7P       | 11.668505   |
| 1222 | 6.2470612 | 0.5357149 | ADAMTS2      | 11.66116773 |
| 1223 | 0.1165545 | 0.01      | AVPR2        | 11.655453   |
| 1224 | 0.1164243 | 0.01      | FAM74A1      | 11.6424302  |
| 1225 | 10.350969 | 0.889836  | PQLC3        | 11.63244564 |
| 1226 | 0.1162295 | 0.01      | TTL13        | 11.6229504  |
| 1227 | 0.1159385 | 0.01      | GTF2IRD2B    | 11.5938526  |
| 1228 | 113.01604 | 9.7610271 | KANK2        | 11.57829373 |
| 1229 | 19.390378 | 1.6750137 | BAI1         | 11.57625026 |
| 1230 | 231.68119 | 20.044949 | TIMP2        | 11.55808298 |
| 1231 | 0.1152015 | 0.01      | CEACAM20     | 11.5201493  |
| 1232 | 0.1150108 | 0.01      | LRRC19       | 11.5010762  |
| 1233 | 0.114884  | 0.01      | FGB          | 11.4883958  |
| 1234 | 16.445497 | 1.4340403 | UCN2         | 11.46794641 |
| 1235 | 0.1146312 | 0.01      | FAM180A      | 11.4631188  |
| 1236 | 0.1140665 | 0.01      | MKRN9P       | 11.4066503  |
| 1237 | 0.1138173 | 0.01      | LOC100129935 | 11.3817313  |
| 1238 | 0.1138173 | 0.01      | FLJ37201     | 11.3817313  |
| 1239 | 0.3553549 | 0.0312429 | XIRP1        | 11.37394701 |
| 1240 | 0.4139391 | 0.0363936 | ZNF701       | 11.37394696 |
| 1241 | 0.4017516 | 0.0353221 | NLGN4X       | 11.37394696 |
| 1242 | 0.5735288 | 0.0504248 | AFAP1L2      | 11.37394694 |
| 1243 | 1.1804297 | 0.1037836 | LOC100506394 | 11.3739469  |
| 1244 | 0.9453173 | 0.0831125 | ITGB2-AS1    | 11.37394689 |
| 1245 | 2.3288803 | 0.2047557 | PCDH18       | 11.37394687 |

|      |           |           |              |             |
|------|-----------|-----------|--------------|-------------|
| 1246 | 0.8951169 | 0.0786989 | AGSK1        | 11.37394686 |
| 1247 | 5.3460693 | 0.4700276 | KRT79        | 11.37394685 |
| 1248 | 8.4374656 | 0.7418239 | SERPINA1     | 11.37394685 |
| 1249 | 0.9943156 | 0.0874205 | ZFP30        | 11.37394684 |
| 1250 | 2.3273041 | 0.2046171 | CDA          | 11.37394684 |
| 1251 | 0.4190083 | 0.0368393 | FAM65B       | 11.37394677 |
| 1252 | 0.5378683 | 0.0472895 | GPR78        | 11.37394675 |
| 1253 | 0.1136311 | 0.01      | KLHL38       | 11.3631134  |
| 1254 | 0.1136311 | 0.01      | CD40LG       | 11.3631134  |
| 1255 | 0.1134765 | 0.01      | SLC26A1      | 11.347645   |
| 1256 | 0.1133222 | 0.01      | HRK          | 11.3322186  |
| 1257 | 0.1133016 | 0.01      | GDA          | 11.3301649  |
| 1258 | 53.188636 | 4.6951879 | ARHGEF16     | 11.32832942 |
| 1259 | 38.171692 | 3.373589  | P2RX4        | 11.31486141 |
| 1260 | 242.42202 | 21.427907 | RBM19        | 11.3133781  |
| 1261 | 0.1127093 | 0.01      | C1QTNF9      | 11.2709302  |
| 1262 | 0.1126484 | 0.01      | DDX25        | 11.2648378  |
| 1263 | 0.1124053 | 0.01      | CRHBP        | 11.240534   |
| 1264 | 131.28906 | 11.68148  | IL11         | 11.23907792 |
| 1265 | 0.1119224 | 0.01      | GPR171       | 11.1922395  |
| 1266 | 0.1118923 | 0.01      | MOB4         | 11.1892349  |
| 1267 | 0.1118623 | 0.01      | LOC284632    | 11.1862319  |
| 1268 | 123.89255 | 11.094377 | MLLT11       | 11.16714782 |
| 1269 | 0.1116227 | 0.01      | CHI3L1       | 11.1622657  |
| 1270 | 111.94327 | 10.052262 | MFGE8        | 11.13612797 |
| 1271 | 0.1112057 | 0.01      | SLC35G3      | 11.120571   |
| 1272 | 0.1110872 | 0.01      | DIO1         | 11.1087154  |
| 1273 | 0.1109689 | 0.01      | SLC6A7       | 11.096885   |
| 1274 | 10.795058 | 0.9732337 | CA8          | 11.09194818 |
| 1275 | 0.110733  | 0.01      | SKP1P2       | 11.0732997  |
| 1276 | 58.244222 | 5.2627989 | SDC2         | 11.06715708 |
| 1277 | 0.1106154 | 0.01      | LOC100505474 | 11.0615446  |
| 1278 | 1.0459197 | 0.0948312 | MRVI1        | 11.02928183 |
| 1279 | 35.472255 | 3.2161891 | RNU2-1       | 11.0292818  |
| 1280 | 9.8178638 | 0.8901635 | FLJ23867     | 11.02928179 |
| 1281 | 12.203271 | 1.1084806 | RAB37        | 11.00900738 |
| 1282 | 0.1099734 | 0.01      | CYP17A1      | 10.9973351  |
| 1283 | 0.1099153 | 0.01      | HMX1         | 10.9915348  |
| 1284 | 0.1099153 | 0.01      | GPT          | 10.9915348  |
| 1285 | 177.707   | 16.213626 | TK1          | 10.96034878 |
| 1286 | 39.225563 | 3.6028532 | IAH1         | 10.88736089 |
| 1287 | 377.78303 | 34.769284 | PFKM         | 10.86542464 |
| 1288 | 1.0201374 | 0.0939617 | RAB3D        | 10.8569493  |

|      |           |           |              |             |
|------|-----------|-----------|--------------|-------------|
| 1289 | 27.352434 | 2.5193481 | CSF2         | 10.85694927 |
| 1290 | 10.133463 | 0.933362  | RIT1         | 10.85694926 |
| 1291 | 1.379694  | 0.1270793 | SLC25A34     | 10.85694925 |
| 1292 | 0.7881126 | 0.0725906 | NXPH3        | 10.85694921 |
| 1293 | 0.1085414 | 0.01      | JAKMIP2-AS1  | 10.8541406  |
| 1294 | 0.1083157 | 0.01      | LINC00535    | 10.8315749  |
| 1295 | 0.108222  | 0.01      | TMEM132D     | 10.8222001  |
| 1296 | 0.1082033 | 0.01      | KRT81        | 10.8203271  |
| 1297 | 3.9995864 | 0.3732368 | LRRC15       | 10.71594993 |
| 1298 | 0.1071463 | 0.01      | OMG          | 10.7146273  |
| 1299 | 0.1069813 | 0.01      | FLJ42969     | 10.6981263  |
| 1300 | 1.7213921 | 0.1611094 | LOC100126784 | 10.68461676 |
| 1301 | 1.093868  | 0.1023778 | CASP10       | 10.68461675 |
| 1302 | 10.894409 | 1.019635  | GPX3         | 10.68461675 |
| 1303 | 0.1068168 | 0.01      | CLUL1        | 10.6816761  |
| 1304 | 0.1067074 | 0.01      | NXPE1        | 10.6707373  |
| 1305 | 0.1066528 | 0.01      | APOA5        | 10.6652764  |
| 1306 | 28.048928 | 2.6346124 | HEYL         | 10.64632062 |
| 1307 | 0.1061097 | 0.01      | C3orf65      | 10.6109725  |
| 1308 | 0.1056793 | 0.01      | ZNF474       | 10.567926   |
| 1309 | 0.1052257 | 0.01      | VIPR2        | 10.5225701  |
| 1310 | 0.105093  | 0.01      | RIBC1        | 10.5093041  |
| 1311 | 0.1050401 | 0.01      | SERPING1     | 10.5040071  |
| 1312 | 0.1049872 | 0.01      | PLA2G2D      | 10.4987154  |
| 1313 | 0.1049343 | 0.01      | NTN3         | 10.493429   |
| 1314 | 0.1048287 | 0.01      | FUT5         | 10.4828722  |
| 1315 | 0.1045657 | 0.01      | CASQ1        | 10.456573   |
| 1316 | 72.423383 | 6.933716  | CD82         | 10.44510373 |
| 1317 | 0.1043563 | 0.01      | SLC22A16     | 10.4356285  |
| 1318 | 0.1043041 | 0.01      | EPPIN        | 10.4304054  |
| 1319 | 0.1041998 | 0.01      | LINC00475    | 10.419975   |
| 1320 | 19.279897 | 1.8503687 | CDKN2D       | 10.41948978 |
| 1321 | 0.1040697 | 0.01      | L1TD1        | 10.4069663  |
| 1322 | 0.1039399 | 0.01      | TTC24        | 10.39399    |
| 1323 | 0.1039399 | 0.01      | MT1IP        | 10.39399    |
| 1324 | 0.1038881 | 0.01      | SLC38A5      | 10.3888086  |
| 1325 | 13.353394 | 1.2854579 | NLRC5        | 10.38804449 |
| 1326 | 0.103733  | 0.01      | DCSTAMP      | 10.3732952  |
| 1327 | 0.1035783 | 0.01      | LOC100128076 | 10.357828   |
| 1328 | 0.1035268 | 0.01      | DCAF8L2      | 10.3526826  |
| 1329 | 56.604387 | 5.4689759 | TP53I11      | 10.35008889 |
| 1330 | 0.2915086 | 0.0281925 | ZNF470       | 10.33995172 |
| 1331 | 1.1867853 | 0.1147767 | AP1M2        | 10.33995172 |

|      |           |           |              |             |
|------|-----------|-----------|--------------|-------------|
| 1332 | 0.6794897 | 0.065715  | LOC400958    | 10.33995171 |
| 1333 | 1.3106887 | 0.1267597 | EFNA1        | 10.33995171 |
| 1334 | 2.6513931 | 0.2564222 | MGC16121     | 10.3399517  |
| 1335 | 1.8817111 | 0.1819845 | AMT          | 10.33995169 |
| 1336 | 47.256122 | 4.570246  | PTPLA        | 10.33995169 |
| 1337 | 1.8169093 | 0.1757174 | MMP7         | 10.33995167 |
| 1338 | 0.1032703 | 0.01      | LOC440173    | 10.3270317  |
| 1339 | 106.38068 | 10.31175  | IFI6         | 10.3164518  |
| 1340 | 5443.3949 | 528.05536 | BCYRN1       | 10.30837931 |
| 1341 | 0.103066  | 0.01      | TRH          | 10.3066024  |
| 1342 | 0.103066  | 0.01      | DOC2B        | 10.3066024  |
| 1343 | 0.1029642 | 0.01      | GC           | 10.296418   |
| 1344 | 0.1027864 | 0.01      | HLA-DPB1     | 10.2786437  |
| 1345 | 0.102458  | 0.01      | LOC286359    | 10.2457965  |
| 1346 | 0.1024076 | 0.01      | LOC392452    | 10.2407617  |
| 1347 | 106.39413 | 10.418236 | LOC100130776 | 10.21229796 |
| 1348 | 8.4312902 | 0.8272266 | GYG2         | 10.19223809 |
| 1349 | 0.1019068 | 0.01      | LRRC43       | 10.1906846  |
| 1350 | 0.1016335 | 0.01      | CHRD1        | 10.1633504  |
| 1351 | 0.1016087 | 0.01      | HIF1A-AS2    | 10.1608728  |
| 1352 | 0.1015097 | 0.01      | KCNIP1       | 10.1509742  |
| 1353 | 2.9702081 | 0.2931179 | PLSCR4       | 10.13315264 |
| 1354 | 230.01797 | 22.712246 | LMNA         | 10.12748693 |
| 1355 | 0.1008222 | 0.01      | FAM194A      | 10.0822206  |
| 1356 | 17.116684 | 1.7004037 | ZBTB7B       | 10.06624708 |
| 1357 | 0.1002403 | 0.01      | CHGA         | 10.024026   |
| 1358 | 0.1000958 | 0.01      | HCAR2        | 10.0095821  |
| 1359 | 2.4174342 | 0.2418574 | GGT5         | 9.995286611 |
| 1360 | 0.0996174 | 0.01      | RGS22        | 9.9617352   |
| 1361 | 16.044088 | 1.6121141 | TNFRSF9      | 9.952203495 |
| 1362 | 0.0994272 | 0.01      | TRPM3        | 9.9427242   |
| 1363 | 5.2518436 | 0.5283707 | SEMA5A       | 9.939695482 |
| 1364 | 0.0992615 | 0.01      | GREM2        | 9.9261491   |
| 1365 | 0.0990492 | 0.01      | SMCO3        | 9.9049192   |
| 1366 | 1632.1688 | 165.72253 | MYL6         | 9.848803984 |
| 1367 | 0.0984255 | 0.01      | MYO3B        | 9.8425457   |
| 1368 | 0.8378313 | 0.0852932 | ZNF28        | 9.822954048 |
| 1369 | 0.0981165 | 0.01      | LOC100505716 | 9.8116526   |
| 1370 | 0.0979781 | 0.01      | MGC16025     | 9.7978138   |
| 1371 | 0.0977025 | 0.01      | SLFNL1       | 9.7702532   |
| 1372 | 0.0977025 | 0.01      | SMC1B        | 9.7702532   |
| 1373 | 0.0977025 | 0.01      | NME9         | 9.7702532   |
| 1374 | 86.429836 | 8.8487988 | CARKD        | 9.767408905 |



|      |           |           |              |             |
|------|-----------|-----------|--------------|-------------|
| 1375 | 0.0976567 | 0.01      | FAM83F       | 9.7656748   |
| 1376 | 0.097474  | 0.01      | LOC100132781 | 9.7474041   |
| 1377 | 0.0970654 | 0.01      | LMCD1-AS1    | 9.706544    |
| 1378 | 0.0968399 | 0.01      | TRIM72       | 9.6839916   |
| 1379 | 0.0965259 | 0.01      | PLCZ1        | 9.6525938   |
| 1380 | 1.8015394 | 0.186676  | PLA2G6       | 9.650621577 |
| 1381 | 1.2799267 | 0.1326264 | ZNF611       | 9.65062154  |
| 1382 | 1.1785874 | 0.1221255 | GPR85        | 9.650621538 |
| 1383 | 0.0964366 | 0.01      | TMEM139      | 9.6436604   |
| 1384 | 4.9424421 | 0.513548  | MGAT3        | 9.624108875 |
| 1385 | 0.0961696 | 0.01      | ARSF         | 9.6169589   |
| 1386 | 0.0961696 | 0.01      | UPB1         | 9.6169589   |
| 1387 | 0.0961252 | 0.01      | PGAM1P5      | 9.6125231   |
| 1388 | 0.0958599 | 0.01      | TDGF1        | 9.5859936   |
| 1389 | 0.0958599 | 0.01      | CLCNKB       | 9.5859936   |
| 1390 | 71.174693 | 7.4341419 | HIST1H1C     | 9.574029338 |
| 1391 | 1.3863325 | 0.1449463 | TSPAN11      | 9.564455321 |
| 1392 | 50.082214 | 5.2391748 | GABARAPL1    | 9.559179822 |
| 1393 | 341.97188 | 35.79788  | EGR1         | 9.552853029 |
| 1394 | 3396.2573 | 357.15014 | B2M          | 9.509326633 |
| 1395 | 0.0949428 | 0.01      | NRG4         | 9.4942825   |
| 1396 | 10.044548 | 1.0579939 | BTN3A1       | 9.49395564  |
| 1397 | 0.0944694 | 0.01      | LOC100505715 | 9.4469402   |
| 1398 | 8.9876901 | 0.9525696 | APOL6        | 9.435205911 |
| 1399 | 14.614104 | 1.551252  | JUP          | 9.42084487  |
| 1400 | 0.0940856 | 0.01      | C6orf165     | 9.4085553   |
| 1401 | 0.0940431 | 0.01      | LOC115110    | 9.4043096   |
| 1402 | 3.940989  | 0.4192561 | EBF1         | 9.39995607  |
| 1403 | 0.093747  | 0.01      | NR1I2        | 9.3746964   |
| 1404 | 0.0936206 | 0.01      | ZBED2        | 9.362062    |
| 1405 | 9.0630249 | 0.9685144 | FGF1         | 9.357656279 |
| 1406 | 0.0934527 | 0.01      | CACNA1C-AS1  | 9.3452691   |
| 1407 | 0.0932436 | 0.01      | PRAM1        | 9.3243624   |
| 1408 | 0.5045993 | 0.0542233 | PLEKHA6      | 9.305956557 |
| 1409 | 0.7624372 | 0.08193   | CHRNE        | 9.305956538 |
| 1410 | 0.7177939 | 0.0771327 | MYCN         | 9.305956528 |
| 1411 | 1.1627994 | 0.1249522 | TSPAN10      | 9.305956524 |
| 1412 | 3.4297723 | 0.3685567 | GPR55        | 9.305956523 |
| 1413 | 2.0222054 | 0.2173023 | ZNF774       | 9.305956522 |
| 1414 | 1.0484044 | 0.1126595 | CLUHP3       | 9.305956512 |
| 1415 | 4.011969  | 0.4311184 | LINC00460    | 9.305956508 |
| 1416 | 1.4086335 | 0.151369  | DNALI1       | 9.3059565   |
| 1417 | 1.465309  | 0.1574593 | LOC100505933 | 9.305956495 |

|      |           |           |              |             |
|------|-----------|-----------|--------------|-------------|
| 1418 | 0.7238887 | 0.0777877 | EXOC3L4      | 9.305956492 |
| 1419 | 0.648995  | 0.0697397 | ZNF596       | 9.305956446 |
| 1420 | 0.092622  | 0.01      | C8orf86      | 9.2622      |
| 1421 | 27.420987 | 2.9776229 | MEIS3        | 9.209019472 |
| 1422 | 0.0920086 | 0.01      | LINC00511    | 9.2008609   |
| 1423 | 0.0919274 | 0.01      | CCDC17       | 9.1927437   |
| 1424 | 0.0918869 | 0.01      | FCGR1A       | 9.1886905   |
| 1425 | 0.0917655 | 0.01      | ZPBP2        | 9.1765522   |
| 1426 | 0.0913232 | 0.01      | ST20-MTHFS   | 9.1323181   |
| 1427 | 101.93005 | 11.17493  | FSTL3        | 9.121314525 |
| 1428 | 0.0912033 | 0.01      | OXGR1        | 9.1203282   |
| 1429 | 0.0910041 | 0.01      | TISP43       | 9.1004149   |
| 1430 | 0.0910041 | 0.01      | LRRC70       | 9.1004149   |
| 1431 | 1.6298574 | 0.1791218 | ST8SIA2      | 9.099157485 |
| 1432 | 0.0909644 | 0.01      | ZNF571       | 9.0964426   |
| 1433 | 0.0908059 | 0.01      | LOC253573    | 9.0805882   |
| 1434 | 0.0906873 | 0.01      | PCDHGB3      | 9.0687337   |
| 1435 | 0.0906479 | 0.01      | AIRE         | 9.064789    |
| 1436 | 0.0906085 | 0.01      | HAS2-AS1     | 9.0608478   |
| 1437 | 0.0905691 | 0.01      | PCDHGA5      | 9.05691     |
| 1438 | 0.0905691 | 0.01      | PCDHGA4      | 9.05691     |
| 1439 | 0.0904512 | 0.01      | KCNF1        | 9.0451172   |
| 1440 | 0.0903727 | 0.01      | SPTSSB       | 9.0372723   |
| 1441 | 0.0901577 | 0.01      | PCDHGC4      | 9.015769    |
| 1442 | 0.0899825 | 0.01      | TMEM155      | 8.9982513   |
| 1443 | 0.0899437 | 0.01      | LOC100652999 | 8.9943677   |
| 1444 | 0.0898855 | 0.01      | C9orf84      | 8.9885486   |
| 1445 | 0.0895187 | 0.01      | NDUFAF4P1    | 8.9518686   |
| 1446 | 0.0892886 | 0.01      | MST1L        | 8.928856    |
| 1447 | 0.0889646 | 0.01      | TXLNB        | 8.8964568   |
| 1448 | 1.2562987 | 0.1412785 | SAMD9L       | 8.892358465 |
| 1449 | 4.4406236 | 0.4993752 | VSTM2L       | 8.892358444 |
| 1450 | 0.0889076 | 0.01      | PRDM14       | 8.8907637   |
| 1451 | 56.523794 | 6.3646689 | PLK2         | 8.880869613 |
| 1452 | 0.0886429 | 0.01      | MIA2         | 8.8642918   |
| 1453 | 0.0885299 | 0.01      | BSPRY        | 8.8529949   |
| 1454 | 2.5407311 | 0.2879529 | TRANK1       | 8.823425437 |
| 1455 | 0.0882301 | 0.01      | LOC100144595 | 8.8230102   |
| 1456 | 2765.4363 | 313.57284 | FTH1         | 8.819119349 |
| 1457 | 0.3915552 | 0.0445508 | F8           | 8.78895897  |
| 1458 | 1.1589112 | 0.1318599 | TLR3         | 8.78895896  |
| 1459 | 4.7300287 | 0.5381785 | LOC100507463 | 8.788958933 |
| 1460 | 1.7529894 | 0.1994536 | B4GALNT2     | 8.78895891  |

|      |           |           |            |             |
|------|-----------|-----------|------------|-------------|
| 1461 | 0.0877472 | 0.01      | FCRLA      | 8.7747158   |
| 1462 | 98.401928 | 11.214409 | P4HA2      | 8.774597885 |
| 1463 | 5.7448961 | 0.6562226 | CRISPLD2   | 8.754492427 |
| 1464 | 1.66697   | 0.1912737 | LAMA4      | 8.715102142 |
| 1465 | 59.644881 | 6.8473702 | CTIF       | 8.710625965 |
| 1466 | 6.9628205 | 0.8003406 | ALPK2      | 8.699821415 |
| 1467 | 0.0869418 | 0.01      | ITGB6      | 8.6941802   |
| 1468 | 0.0869237 | 0.01      | TACR1      | 8.6923671   |
| 1469 | 1.150017  | 0.1324056 | NCKAP5     | 8.685559424 |
| 1470 | 0.0868331 | 0.01      | CHRNA6     | 8.6833125   |
| 1471 | 0.0867608 | 0.01      | CCRL1      | 8.6760824   |
| 1472 | 4.5899264 | 0.5294245 | AOX1       | 8.669651795 |
| 1473 | 0.0866166 | 0.01      | FCGR3A     | 8.6616584   |
| 1474 | 0.0864728 | 0.01      | RFPL2      | 8.6472822   |
| 1475 | 0.086437  | 0.01      | PCDHB17    | 8.6436956   |
| 1476 | 1.6904567 | 0.1961854 | STXBP5-AS1 | 8.616626402 |
| 1477 | 0.0859025 | 0.01      | GTF2IRD1P1 | 8.5902514   |
| 1478 | 26.832837 | 3.1242786 | LINC00346  | 8.588490481 |
| 1479 | 73.269215 | 8.5467476 | NINJ1      | 8.572759942 |
| 1480 | 0.0857258 | 0.01      | TOP1P1     | 8.5725833   |
| 1481 | 17.791839 | 2.0778129 | PLEKHA4    | 8.562772489 |
| 1482 | 0.0855499 | 0.01      | PCDHGA11   | 8.5549877   |
| 1483 | 22.219598 | 2.598352  | GPRC5B     | 8.551419501 |
| 1484 | 0.7435597 | 0.0871652 | ABCA5      | 8.530460149 |
| 1485 | 17.611225 | 2.0645106 | CRYBB2     | 8.530460142 |
| 1486 | 6.3677625 | 0.7464735 | CCDC159    | 8.530460139 |
| 1487 | 3.5762785 | 0.4192363 | PDGFRL     | 8.53046013  |
| 1488 | 1.0725489 | 0.1257317 | KIAA1755   | 8.530460117 |
| 1489 | 0.085235  | 0.01      | DCAF13P3   | 8.5234969   |
| 1490 | 0.0852001 | 0.01      | BCMO1      | 8.5200123   |
| 1491 | 15.38087  | 1.8087228 | WWC3       | 8.503718887 |
| 1492 | 0.0849224 | 0.01      | GBP7       | 8.4922372   |
| 1493 | 0.0847497 | 0.01      | KRT2       | 8.4749695   |
| 1494 | 367.67757 | 43.429395 | IGFBP7     | 8.466099215 |
| 1495 | 0.0846121 | 0.01      | ARL2-SNX15 | 8.4612059   |
| 1496 | 22.577367 | 2.6692181 | ZBED1      | 8.458419496 |
| 1497 | 0.0845777 | 0.01      | LOC158435  | 8.4577719   |
| 1498 | 6.2189863 | 0.736472  | TNFSF12    | 8.444293874 |
| 1499 | 0.0843381 | 0.01      | CORIN      | 8.4338122   |
| 1500 | 0.0842699 | 0.01      | SLC30A2    | 8.4269915   |
| 1501 | 0.0842359 | 0.01      | ZP4        | 8.4235853   |
| 1502 | 821.33921 | 97.586291 | SPARC      | 8.416542907 |
| 1503 | 37.72316  | 4.4860476 | HPS1       | 8.408996853 |

|      |            |           |              |             |
|------|------------|-----------|--------------|-------------|
| 1504 | 19.943919  | 2.3760842 | PLAC8        | 8.393607838 |
| 1505 | 2.0689737  | 0.2466926 | CGNL1        | 8.386849713 |
| 1506 | 7.7861437  | 0.9296487 | ZNF513       | 8.375360869 |
| 1507 | 0.0836274  | 0.01      | NR1H4        | 8.3627408   |
| 1508 | 9.3560364  | 1.1210448 | PKDCC        | 8.345818147 |
| 1509 | 0.0831602  | 0.01      | SH3GL1P2     | 8.3160216   |
| 1510 | 257.44021  | 31.042374 | LTA4H        | 8.293187054 |
| 1511 | 0.0827475  | 0.01      | DKFZP434A062 | 8.2747469   |
| 1512 | 0.5969194  | 0.0721618 | MYLK2        | 8.271961398 |
| 1513 | 0.7442839  | 0.0899767 | LAPTM5       | 8.27196139  |
| 1514 | 0.6265299  | 0.0757414 | PCDHB15      | 8.27196137  |
| 1515 | 0.6427124  | 0.0776977 | NHLH1        | 8.271961366 |
| 1516 | 1.4273938  | 0.1725581 | LINC00601    | 8.271961364 |
| 1517 | 0.762321   | 0.0921572 | LOC100507156 | 8.271961363 |
| 1518 | 0.3596195  | 0.0434745 | ZNF546       | 8.271961361 |
| 1519 | 0.5994951  | 0.0724732 | LEMD1-AS1    | 8.271961359 |
| 1520 | 2.3749231  | 0.2871052 | GAS5-AS1     | 8.271961359 |
| 1521 | 1.5351713  | 0.1855873 | FOXN3-AS1    | 8.271961358 |
| 1522 | 4.8641751  | 0.5880316 | NBR2         | 8.271961354 |
| 1523 | 1.6318395  | 0.1972736 | TMEM130      | 8.271961351 |
| 1524 | 1.3076047  | 0.1580767 | NDUFA4L2     | 8.271961341 |
| 1525 | 1.3461413  | 0.1627354 | ZNF671       | 8.271961337 |
| 1526 | 2.2491683  | 0.2719027 | ZNF83        | 8.271961336 |
| 1527 | 1.4586142  | 0.1763323 | ANKRD63      | 8.271961332 |
| 1528 | 1.0597146  | 0.1281092 | TMEM184A     | 8.271961323 |
| 1529 | 0.8767794  | 0.1059941 | LOC100130705 | 8.271961321 |
| 1530 | 0.6497256  | 0.0785455 | SLC7A7       | 8.271961321 |
| 1531 | 0.4556425  | 0.0550828 | DKK2         | 8.271961315 |
| 1532 | 0.6779976  | 0.0819633 | GPR37L1      | 8.271961313 |
| 1533 | 0.0826982  | 0.01      | LOC286186    | 8.2698214   |
| 1534 | 0.0825672  | 0.01      | LINC00488    | 8.2567155   |
| 1535 | 0.0824691  | 0.01      | LINC00277    | 8.2469133   |
| 1536 | 0.0820148  | 0.01      | ASPN         | 8.2014758   |
| 1537 | 0.0819825  | 0.01      | OMD          | 8.1982494   |
| 1538 | 0.0819503  | 0.01      | KCNMB2       | 8.1950256   |
| 1539 | 0.0814697  | 0.01      | M1AP         | 8.1469703   |
| 1540 | 1.0114695  | 0.1245001 | PTPRB        | 8.124247758 |
| 1541 | 32.7111109 | 4.0263554 | ZFP36        | 8.124247752 |
| 1542 | 21.104945  | 2.6085893 | S1PR3        | 8.090558688 |
| 1543 | 93.231355  | 11.530197 | BLVRB        | 8.085842214 |
| 1544 | 44.946127  | 5.5623086 | PALLD        | 8.08048076  |
| 1545 | 0.0806812  | 0.01      | PCSK1        | 8.0681185   |
| 1546 | 0.0806812  | 0.01      | CDSN         | 8.0681185   |

|      |           |           |              |             |
|------|-----------|-----------|--------------|-------------|
| 1547 | 0.0806812 | 0.01      | LDHAL6A      | 8.0681185   |
| 1548 | 3.9511816 | 0.4899073 | ACBD4        | 8.065162312 |
| 1549 | 38.522044 | 4.7834268 | TMEM173      | 8.0532316   |
| 1550 | 12.265413 | 1.5235798 | OLFML3       | 8.050390957 |
| 1551 | 137.00839 | 17.042863 | COL5A2       | 8.039047758 |
| 1552 | 11.293908 | 1.4086677 | KIAA1462     | 8.017439462 |
| 1553 | 0.0798772 | 0.01      | GPR17        | 7.9877156   |
| 1554 | 27.349609 | 3.4247103 | PPP2R5B      | 7.985962685 |
| 1555 | 5.1335717 | 0.6442861 | ATXN1        | 7.967845126 |
| 1556 | 0.079562  | 0.01      | EPHA5        | 7.9562039   |
| 1557 | 0.0795418 | 0.01      | CYP4F22      | 7.9541794   |
| 1558 | 2.3763949 | 0.2997737 | LINC00085    | 7.927296299 |
| 1559 | 22.824707 | 2.879255  | SOX2         | 7.927296292 |
| 1560 | 33.951752 | 4.2828918 | ATF3         | 7.927296291 |
| 1561 | 0.079089  | 0.01      | RANBP3L      | 7.9088994   |
| 1562 | 0.0788794 | 0.01      | BLK          | 7.8879447   |
| 1563 | 24.004566 | 3.0525381 | RASSF4       | 7.86380536  |
| 1564 | 3.9477473 | 0.5023625 | C10orf114    | 7.858363286 |
| 1565 | 0.0783457 | 0.01      | ALDH3B2      | 7.8345677   |
| 1566 | 0.0782868 | 0.01      | LOC158434    | 7.8286814   |
| 1567 | 0.0779938 | 0.01      | WDR49        | 7.7993825   |
| 1568 | 0.07779   | 0.01      | IL1RAPL1     | 7.7790034   |
| 1569 | 2.8469877 | 0.3671181 | ACCS         | 7.754963756 |
| 1570 | 1.0249156 | 0.1321625 | ZSCAN31      | 7.75496375  |
| 1571 | 0.0775007 | 0.01      | LOC100506874 | 7.7500744   |
| 1572 | 0.0774144 | 0.01      | PARP15       | 7.7414376   |
| 1573 | 0.0773473 | 0.01      | OTOGL        | 7.7347334   |
| 1574 | 0.0772422 | 0.01      | C9orf152     | 7.7242217   |
| 1575 | 0.077185  | 0.01      | C3orf27      | 7.7185      |
| 1576 | 29.599467 | 3.8401149 | BAMBI        | 7.707963981 |
| 1577 | 364.4568  | 47.374605 | FN1          | 7.693083744 |
| 1578 | 0.0767868 | 0.01      | LOC100128264 | 7.6786846   |
| 1579 | 0.0767303 | 0.01      | CASQ2        | 7.6730302   |
| 1580 | 2.099886  | 0.2744388 | CDK15        | 7.651564238 |
| 1581 | 0.0763928 | 0.01      | PPT2-EGFL8   | 7.6392779   |
| 1582 | 0.0762809 | 0.01      | KNG1         | 7.628093    |
| 1583 | 0.0759473 | 0.01      | MKRN3        | 7.594734    |
| 1584 | 4.36508   | 0.5756682 | VAMP1        | 7.582631236 |
| 1585 | 1.7725842 | 0.233769  | POU6F1       | 7.582631233 |
| 1586 | 4.9997699 | 0.6593714 | CDC42EP5     | 7.582631232 |
| 1587 | 0.0757816 | 0.01      | FAM188B      | 7.5781636   |
| 1588 | 0.0756716 | 0.01      | SLAMF6       | 7.5671569   |
| 1589 | 38.963853 | 5.1553043 | UBE2L6       | 7.558012304 |

|      |           |           |             |             |
|------|-----------|-----------|-------------|-------------|
| 1590 | 0.0752888 | 0.01      | ALOX12P2    | 7.5288837   |
| 1591 | 29.771357 | 3.9577388 | USP18       | 7.522314851 |
| 1592 | 0.0749638 | 0.01      | GCM1        | 7.4963849   |
| 1593 | 0.07491   | 0.01      | CHRM2       | 7.4909957   |
| 1594 | 0.074883  | 0.01      | FCAMR       | 7.488304    |
| 1595 | 17.039658 | 2.2767643 | C1orf85     | 7.484155502 |
| 1596 | 92.580688 | 12.40571  | ECM1        | 7.462747735 |
| 1597 | 5.8418955 | 0.7831446 | LHX6        | 7.459536572 |
| 1598 | 0.0744816 | 0.01      | BLOC1S5     | 7.4481594   |
| 1599 | 0.0744816 | 0.01      | CCDC33      | 7.4481594   |
| 1600 | 0.0743487 | 0.01      | TAS1R1      | 7.4348734   |
| 1601 | 50.076834 | 6.7589167 | HS6ST1      | 7.409002975 |
| 1602 | 88.291391 | 11.923632 | PSMB9       | 7.404739593 |
| 1603 | 3.20516   | 0.4339695 | THBS3       | 7.385679779 |
| 1604 | 0.073822  | 0.01      | GPR61       | 7.3821998   |
| 1605 | 80.534709 | 10.909862 | CSF1        | 7.38182638  |
| 1606 | 0.0737436 | 0.01      | IL23R       | 7.3743631   |
| 1607 | 45.200629 | 6.1334184 | KIAA1522    | 7.369565565 |
| 1608 | 0.0736394 | 0.01      | CTAGE7P     | 7.3639399   |
| 1609 | 0.0735874 | 0.01      | VIT         | 7.3587394   |
| 1610 | 0.073406  | 0.01      | ABCC13      | 7.3405953   |
| 1611 | 0.0729946 | 0.01      | CDH20       | 7.2994571   |
| 1612 | 0.0728415 | 0.01      | FBXO40      | 7.2841489   |
| 1613 | 0.0728415 | 0.01      | PHEX        | 7.2841489   |
| 1614 | 1106.3888 | 152.15789 | TMSB4X      | 7.271320861 |
| 1615 | 0.072689  | 0.01      | BMP3        | 7.2689048   |
| 1616 | 0.0725625 | 0.01      | CNGA1       | 7.25625     |
| 1617 | 0.0723861 | 0.01      | MORF4L2-AS1 | 7.2386072   |
| 1618 | 0.3583386 | 0.0495082 | ZNF569      | 7.237966239 |
| 1619 | 0.4495521 | 0.0621103 | INA         | 7.237966226 |
| 1620 | 0.6285207 | 0.0868366 | LOC148709   | 7.237966215 |
| 1621 | 0.7954179 | 0.1098952 | OLAH        | 7.237966213 |
| 1622 | 0.8606469 | 0.1189073 | LEF1-AS1    | 7.237966204 |
| 1623 | 0.6670309 | 0.0921572 | RABL2A      | 7.237966198 |
| 1624 | 0.4865899 | 0.0672274 | LOC338758   | 7.237966185 |
| 1625 | 0.2551236 | 0.035248  | KY          | 7.237966184 |
| 1626 | 6.4791098 | 0.8951561 | LMF1        | 7.23796618  |
| 1627 | 0.9442049 | 0.1304517 | RARRES1     | 7.237966178 |
| 1628 | 7.7958397 | 1.077076  | BST1        | 7.237966176 |
| 1629 | 1.4429243 | 0.1993549 | PTGES3L     | 7.237966174 |
| 1630 | 0.630422  | 0.0870993 | ASIC3       | 7.237966173 |
| 1631 | 0.4843282 | 0.066915  | RCSD1       | 7.237966173 |
| 1632 | 0.3156202 | 0.0436062 | SLC16A12    | 7.237966172 |

|      |           |           |              |             |
|------|-----------|-----------|--------------|-------------|
| 1633 | 0.9318406 | 0.1287434 | RFTN2        | 7.237966169 |
| 1634 | 0.5886992 | 0.0813349 | LIPH         | 7.237966166 |
| 1635 | 0.7096177 | 0.098041  | RPS6KA6      | 7.237966166 |
| 1636 | 0.666726  | 0.0921151 | LINC00685    | 7.237966165 |
| 1637 | 0.693015  | 0.0957472 | FAAH         | 7.237966165 |
| 1638 | 0.9128889 | 0.1261251 | ARIH2OS      | 7.237966164 |
| 1639 | 0.5756892 | 0.0795374 | LOC283663    | 7.237966163 |
| 1640 | 0.8598015 | 0.1187905 | FHAD1        | 7.237966157 |
| 1641 | 0.0722856 | 0.01      | ALPP         | 7.228564    |
| 1642 | 100.58022 | 13.960915 | ITGB3        | 7.204414713 |
| 1643 | 0.0720358 | 0.01      | CDC14C       | 7.2035776   |
| 1644 | 0.0720109 | 0.01      | TNFSF14      | 7.2010885   |
| 1645 | 0.0716642 | 0.01      | SLC13A4      | 7.1664202   |
| 1646 | 0.7016818 | 0.0981724 | SAA2         | 7.147448096 |
| 1647 | 5.8122577 | 0.8140998 | ARSD         | 7.139490446 |
| 1648 | 1.4245611 | 0.1999924 | MIR143HG     | 7.123077832 |
| 1649 | 37.615475 | 5.2914578 | DCAKD        | 7.108716784 |
| 1650 | 8.1914254 | 1.1650165 | ARSA         | 7.031167143 |
| 1651 | 0.0702391 | 0.01      | LOC150622    | 7.023913    |
| 1652 | 0.0701682 | 0.01      | C5orf64      | 7.0168182   |
| 1653 | 0.0701446 | 0.01      | LILRB1       | 7.0144564   |
| 1654 | 215.91727 | 30.942329 | RHOB         | 6.978054827 |
| 1655 | 9.3786989 | 1.348924  | FCHSD1       | 6.952726134 |
| 1656 | 51.285815 | 7.3809026 | EMC10        | 6.948447532 |
| 1657 | 0.0692357 | 0.01      | ACSBG1       | 6.9235714   |
| 1658 | 63.75216  | 9.226797  | ARHGEF2      | 6.909457297 |
| 1659 | 0.0689836 | 0.01      | LOC100131551 | 6.8983615   |
| 1660 | 63.199458 | 9.1702106 | SDC3         | 6.891821874 |
| 1661 | 0.0688241 | 0.01      | FRMD1        | 6.8824141   |
| 1662 | 0.0686202 | 0.01      | ITIH3        | 6.8620184   |
| 1663 | 106.2479  | 15.499871 | SUN2         | 6.854760302 |
| 1664 | 0.0684624 | 0.01      | CLEC12B      | 6.8462385   |
| 1665 | 0.0684624 | 0.01      | ERVW-1       | 6.8462385   |
| 1666 | 0.0683725 | 0.01      | NEUROD2      | 6.8372539   |
| 1667 | 0.0682159 | 0.01      | CHRM5        | 6.8215876   |
| 1668 | 131.46419 | 19.272653 | SLC16A3      | 6.82128156  |
| 1669 | 0.0681267 | 0.01      | ADAM20P1     | 6.8126675   |
| 1670 | 0.0680822 | 0.01      | PIK3R6       | 6.8082163   |
| 1671 | 38.764141 | 5.6958159 | GIPC3        | 6.805722297 |
| 1672 | 4.8791792 | 0.7172521 | CPED1        | 6.802599793 |
| 1673 | 16.65597  | 2.4484713 | TMEM45A      | 6.802599791 |
| 1674 | 0.0678826 | 0.01      | ANKRD26P1    | 6.7882573   |
| 1675 | 63.013751 | 9.2967832 | KIAA0930     | 6.778016604 |

|      |           |           |              |             |
|------|-----------|-----------|--------------|-------------|
| 1676 | 0.0677281 | 0.01      | ZNF20        | 6.7728144   |
| 1677 | 8.9924802 | 1.3306625 | SLC2A10      | 6.757896992 |
| 1678 | 0.0675306 | 0.01      | ACTN3        | 6.7530622   |
| 1679 | 0.0674869 | 0.01      | CPN2         | 6.7486885   |
| 1680 | 0.0673778 | 0.01      | LHCGR        | 6.7377789   |
| 1681 | 0.8249676 | 0.1227453 | PCDHB10      | 6.720968615 |
| 1682 | 1.6310617 | 0.2426825 | SGCG         | 6.7209686   |
| 1683 | 9.4069219 | 1.3996378 | LOC100506100 | 6.720968597 |
| 1684 | 18.543419 | 2.7590397 | ING4         | 6.720968596 |
| 1685 | 4.1048386 | 0.6107511 | RPL13AP20    | 6.720968595 |
| 1686 | 2.6251875 | 0.3905966 | YJEFN3       | 6.720968595 |
| 1687 | 1.5908359 | 0.2366974 | ACOT4        | 6.720968594 |
| 1688 | 11.241467 | 1.6725962 | THNSL2       | 6.720968592 |
| 1689 | 0.740824  | 0.1102258 | LOXL4        | 6.720968574 |
| 1690 | 0.0668805 | 0.01      | 10-Mar       | 6.6880456   |
| 1691 | 25.636446 | 3.8390066 | IFI35        | 6.677885462 |
| 1692 | 0.0667733 | 0.01      | C17orf72     | 6.677331    |
| 1693 | 0.0667305 | 0.01      | KLK10        | 6.6730548   |
| 1694 | 3.6178303 | 0.5429304 | LAMP3        | 6.663524422 |
| 1695 | 0.0665388 | 0.01      | WNT16        | 6.6538793   |
| 1696 | 12.36113  | 1.8596242 | MMP11        | 6.647111795 |
| 1697 | 0.0661796 | 0.01      | LOC283038    | 6.6179581   |
| 1698 | 0.0659701 | 0.01      | LOC284798    | 6.5970086   |
| 1699 | 0.065845  | 0.01      | SH2D3C       | 6.5845024   |
| 1700 | 0.0658242 | 0.01      | PCDHB18      | 6.5824226   |
| 1701 | 8.243358  | 1.2540755 | DNAJB4       | 6.573255002 |
| 1702 | 0.065679  | 0.01      | PCDHB3       | 6.567901    |
| 1703 | 26.474204 | 4.0328327 | ASMTL        | 6.564667001 |
| 1704 | 0.0655757 | 0.01      | CD4          | 6.5575677   |
| 1705 | 0.0655344 | 0.01      | TMPRSS9      | 6.5534434   |
| 1706 | 4.9474267 | 0.7554896 | SLC45A1      | 6.548636071 |
| 1707 | 0.8822617 | 0.1347245 | ABI3BP       | 6.548636058 |
| 1708 | 1.7645234 | 0.269449  | LOC100292680 | 6.548636055 |
| 1709 | 4.8790796 | 0.7475117 | STAT5A       | 6.527094499 |
| 1710 | 0.0652676 | 0.01      | TMEM232      | 6.5267617   |
| 1711 | 0.0652676 | 0.01      | CDH26        | 6.5267617   |
| 1712 | 85.482115 | 13.113438 | PDPN         | 6.518665192 |
| 1713 | 0.0651452 | 0.01      | PPP1R1C      | 6.5145202   |
| 1714 | 0.0651045 | 0.01      | SUSD2        | 6.5104499   |
| 1715 | 9.7390999 | 1.5003562 | PDCD1LG2     | 6.491191892 |
| 1716 | 0.0648815 | 0.01      | TMPRSS6      | 6.4881538   |
| 1717 | 0.0648008 | 0.01      | IL2RA        | 6.480084    |
| 1718 | 1.3389842 | 0.2071939 | HCN3         | 6.462469813 |



|      |           |           |              |             |
|------|-----------|-----------|--------------|-------------|
| 1719 | 6.9698829 | 1.0785169 | DHRS1        | 6.462469802 |
| 1720 | 0.0644402 | 0.01      | CCDC114      | 6.4440167   |
| 1721 | 0.0643506 | 0.01      | LOC100130992 | 6.4350625   |
| 1722 | 5.2162975 | 0.8136772 | SRR          | 6.410770045 |
| 1723 | 19.912144 | 3.1060456 | TRIM16       | 6.410770043 |
| 1724 | 1.7095487 | 0.2666682 | ZBTB20       | 6.410770036 |
| 1725 | 6.8339021 | 1.0681569 | BTN3A3       | 6.397845106 |
| 1726 | 0.0638479 | 0.01      | CX3CR1       | 6.3847886   |
| 1727 | 27.220415 | 4.2822775 | SERINC2      | 6.356527674 |
| 1728 | 0.0634784 | 0.01      | ITIH4        | 6.3478373   |
| 1729 | 125.96725 | 19.966693 | GADD45B      | 6.308869071 |
| 1730 | 2.685901  | 0.4258353 | MIRLET7BHG   | 6.307370531 |
| 1731 | 5.4713035 | 0.8687407 | IFIT3        | 6.297970568 |
| 1732 | 46.457647 | 7.4032775 | NNMT         | 6.275281023 |
| 1733 | 0.0624761 | 0.01      | CACNA1I      | 6.2476117   |
| 1734 | 72.326015 | 11.586498 | PTGR1        | 6.242267126 |
| 1735 | 60.053252 | 9.6233337 | TAP1         | 6.240379292 |
| 1736 | 0.4494597 | 0.0724471 | TMEM92       | 6.203971049 |
| 1737 | 0.5818506 | 0.0937868 | C7orf57      | 6.203971047 |
| 1738 | 0.5103661 | 0.0822644 | ZMIZ1-AS1    | 6.203971043 |
| 1739 | 0.3441775 | 0.055477  | PYGM         | 6.203971039 |
| 1740 | 0.491895  | 0.0792871 | IL1RL1       | 6.203971036 |
| 1741 | 0.5184067 | 0.0835605 | BNIP1        | 6.203971036 |
| 1742 | 0.7350952 | 0.1184879 | FLJ30403     | 6.203971035 |
| 1743 | 0.4648316 | 0.0749249 | PTPRG-AS1    | 6.203971032 |
| 1744 | 0.6008635 | 0.0968514 | PRCD         | 6.20397103  |
| 1745 | 0.542707  | 0.0874774 | ADRA1A       | 6.20397103  |
| 1746 | 0.6713541 | 0.1082136 | NPR3         | 6.203971027 |
| 1747 | 0.6150502 | 0.0991381 | ZSCAN12P1    | 6.203971027 |
| 1748 | 1.9741033 | 0.3181999 | GABRE        | 6.203971014 |
| 1749 | 0.8196637 | 0.1321192 | N4BP2L1      | 6.203971012 |
| 1750 | 9.6992657 | 1.5633964 | CNPY4        | 6.203971011 |
| 1751 | 0.8471524 | 0.13655   | ZSWIM8-AS1   | 6.20397101  |
| 1752 | 1.2462429 | 0.2008783 | EVI2A        | 6.203971009 |
| 1753 | 1.698909  | 0.2738422 | TEX29        | 6.203971003 |
| 1754 | 1.2355702 | 0.199158  | GIPR         | 6.203971002 |
| 1755 | 0.5940128 | 0.0957472 | ST6GALNAC2   | 6.203970997 |
| 1756 | 0.7248678 | 0.1168393 | BVES-AS1     | 6.203970997 |
| 1757 | 0.8255262 | 0.1330642 | STX1B        | 6.203970994 |
| 1758 | 0.6308764 | 0.1016891 | EFCAB13      | 6.203970993 |
| 1759 | 0.5033804 | 0.0811384 | ZNF137P      | 6.203970992 |
| 1760 | 0.4874842 | 0.0785762 | ZNF283       | 6.203970991 |
| 1761 | 0.2323294 | 0.0374485 | PTGS1        | 6.203970978 |

|      |           |           |              |             |
|------|-----------|-----------|--------------|-------------|
| 1762 | 0.2221743 | 0.0358116 | LRRTM2       | 6.203970978 |
| 1763 | 0.2374923 | 0.0382807 | MRO          | 6.203970968 |
| 1764 | 0.0620052 | 0.01      | LOC100379224 | 6.2005207   |
| 1765 | 47.199586 | 7.6206014 | SLC12A7      | 6.193682502 |
| 1766 | 0.9061582 | 0.1469682 | TSIX         | 6.165674891 |
| 1767 | 101.49236 | 16.549482 | MRC2         | 6.132660997 |
| 1768 | 0.061204  | 0.01      | EN2          | 6.1203965   |
| 1769 | 0.060989  | 0.01      | TLR2         | 6.0989026   |
| 1770 | 21.839219 | 3.5857938 | MRAS         | 6.090483735 |
| 1771 | 164.15148 | 27.018487 | TMEM14C      | 6.075524405 |
| 1772 | 0.0606871 | 0.01      | LINC00550    | 6.06871     |
| 1773 | 2.2426193 | 0.3702979 | KIF17        | 6.056257413 |
| 1774 | 1.0413625 | 0.1719482 | LOC389834    | 6.05625741  |
| 1775 | 48.275424 | 7.9861479 | TGM2         | 6.044894831 |
| 1776 | 4.0209385 | 0.6666412 | RASD1        | 6.031638486 |
| 1777 | 15.419694 | 2.5607723 | LOC100506714 | 6.021501276 |
| 1778 | 0.0602137 | 0.01      | HAPLN4       | 6.0213667   |
| 1779 | 5.9971079 | 0.9968644 | PICK1        | 6.015971889 |
| 1780 | 32.334545 | 5.3820328 | PCTP         | 6.007868479 |
| 1781 | 0.0600575 | 0.01      | FGD3         | 6.0057493   |
| 1782 | 13.348615 | 2.2258183 | MSRB2        | 5.997171977 |
| 1783 | 0.0599711 | 0.01      | LINC00478    | 5.9971079   |
| 1784 | 0.0598849 | 0.01      | COPG2IT1     | 5.9884914   |
| 1785 | 40.891628 | 6.8294385 | CEBPD        | 5.987553417 |
| 1786 | 20.394422 | 3.4173244 | NIPAL3       | 5.967950374 |
| 1787 | 0.960174  | 0.1614967 | TLR7         | 5.945472232 |
| 1788 | 4.0076827 | 0.6740731 | FAM212B      | 5.945472223 |
| 1789 | 0.0592718 | 0.01      | LOC100506776 | 5.9271758   |
| 1790 | 9.7561542 | 1.6536262 | TMEM140      | 5.899854785 |
| 1791 | 21.183844 | 3.5919418 | GMPR         | 5.897602071 |
| 1792 | 0.0589032 | 0.01      | PLG          | 5.8903194   |
| 1793 | 4.2424762 | 0.720373  | MTUS1        | 5.889276826 |
| 1794 | 0.0588201 | 0.01      | FBXL16       | 5.8820068   |
| 1795 | 0.0587372 | 0.01      | GOLGA6L10    | 5.8737176   |
| 1796 | 176.68009 | 30.103164 | TM9SF2       | 5.869153525 |
| 1797 | 238.56169 | 40.679989 | PLOD1        | 5.864349834 |
| 1798 | 1.3882412 | 0.2369293 | SLC7A5P2     | 5.859305967 |
| 1799 | 1.3511791 | 0.2306039 | HSF4         | 5.859305958 |
| 1800 | 17.874831 | 3.0506738 | TRIM16L      | 5.859305954 |
| 1801 | 38.273464 | 6.5320815 | KDEL1C       | 5.859305954 |
| 1802 | 4.0465922 | 0.6906265 | TMEM86B      | 5.85930595  |
| 1803 | 21.012938 | 3.5920393 | BTN3A2       | 5.849863076 |
| 1804 | 5.0879798 | 0.8703279 | IQSEC2       | 5.846049605 |

|      |           |           |           |             |
|------|-----------|-----------|-----------|-------------|
| 1805 | 2.7835133 | 0.4762766 | PIEZO2    | 5.844320513 |
| 1806 | 54.912681 | 9.4196415 | PPIC      | 5.82959345  |
| 1807 | 7.1282894 | 1.2255874 | FNDC1     | 5.816222824 |
| 1808 | 17.226263 | 2.9617612 | B3GNT9    | 5.816222822 |
| 1809 | 10.763819 | 1.8506546 | DENND2A   | 5.816222819 |
| 1810 | 8.0600266 | 1.3872517 | GBP3      | 5.810068089 |
| 1811 | 0.0579693 | 0.01      | LOC157381 | 5.7969263   |
| 1812 | 328.76662 | 56.719908 | COL6A2    | 5.796317884 |
| 1813 | 0.6894938 | 0.1190759 | DCLK1     | 5.790372966 |
| 1814 | 1.2600272 | 0.2176073 | SEC31B    | 5.790372948 |
| 1815 | 109.18198 | 18.860693 | MAGED1    | 5.788863462 |
| 1816 | 0.0578566 | 0.01      | STK31     | 5.7856607   |
| 1817 | 8.2990951 | 1.4367964 | TMEM47    | 5.776110941 |
| 1818 | 0.0577444 | 0.01      | KCNJ13    | 5.7744389   |
| 1819 | 30.255182 | 5.2406807 | CCDC53    | 5.773139691 |
| 1820 | 58.944171 | 10.213386 | SCARA3    | 5.771266511 |
| 1821 | 0.0577124 | 0.01      | CCDC129   | 5.7712407   |
| 1822 | 84.274406 | 14.658025 | SCAMP3    | 5.749369686 |
| 1823 | 0.0574737 | 0.01      | CCDC158   | 5.7473662   |
| 1824 | 94.890839 | 16.553642 | VAMP5     | 5.73232409  |
| 1825 | 42.053711 | 7.3433913 | SGCE      | 5.726742472 |
| 1826 | 24.036261 | 4.2040655 | HSPA1A    | 5.717385049 |
| 1827 | 68.630058 | 12.012786 | TCF7      | 5.713084417 |
| 1828 | 12.170411 | 2.1312438 | FAM102A   | 5.710473319 |
| 1829 | 0.0569709 | 0.01      | MS4A2     | 5.6970886   |
| 1830 | 7.4562886 | 1.3111172 | VPS9D1    | 5.686973428 |
| 1831 | 0.5467194 | 0.0961354 | CARD14    | 5.686973427 |
| 1832 | 8.231219  | 1.4473813 | AAMDC     | 5.686973427 |
| 1833 | 1.3006494 | 0.2287068 | CEP112    | 5.686973425 |
| 1834 | 0.9821742 | 0.172706  | BCRP2     | 5.686973425 |
| 1835 | 0.9387365 | 0.1650679 | SELL      | 5.686973421 |
| 1836 | 1.8427609 | 0.3240319 | IL15      | 5.686973421 |
| 1837 | 1.1331658 | 0.1992564 | GPBAR1    | 5.686973416 |
| 1838 | 67.662175 | 11.924187 | SFTA1P    | 5.674363727 |
| 1839 | 209.64414 | 37.014386 | HLA-E     | 5.663855649 |
| 1840 | 102.8287  | 18.160061 | SHC1      | 5.662354491 |
| 1841 | 17.907008 | 3.1644681 | RUSC1     | 5.658773558 |
| 1842 | 0.0564768 | 0.01      | LINC00607 | 5.6476829   |
| 1843 | 0.4505239 | 0.080234  | MASP1     | 5.615123827 |
| 1844 | 5.9054295 | 1.0520768 | FAM229B   | 5.61311663  |
| 1845 | 79.326261 | 14.140857 | BAD       | 5.609720914 |
| 1846 | 5.7655516 | 1.0285815 | NRBP2     | 5.605342229 |
| 1847 | 0.0560364 | 0.01      | LINC00485 | 5.6036435   |

|      |           |           |             |             |
|------|-----------|-----------|-------------|-------------|
| 1848 | 0.0558862 | 0.01      | LOC401557   | 5.5886163   |
| 1849 | 0.9382669 | 0.1680406 | GPRASP1     | 5.583573894 |
| 1850 | 0.0557516 | 0.01      | AOX2P       | 5.5751605   |
| 1851 | 18.88396  | 3.3911355 | ZCCHC24     | 5.568624581 |
| 1852 | 0.0556771 | 0.01      | FLJ46361    | 5.5677131   |
| 1853 | 28.00136  | 5.0327049 | GAS6        | 5.563878762 |
| 1854 | 9.639252  | 1.744531  | ABCD1       | 5.52541168  |
| 1855 | 0.0552491 | 0.01      | HOTTIP      | 5.5249072   |
| 1856 | 0.478049  | 0.0866872 | MYO5C       | 5.514640908 |
| 1857 | 1.8141415 | 0.3289682 | RHBDL2      | 5.514640908 |
| 1858 | 1.6278561 | 0.2951881 | ZNF320      | 5.514640906 |
| 1859 | 1.637449  | 0.2969276 | SEMA6D      | 5.514640903 |
| 1860 | 1.6377171 | 0.2969762 | GBAP1       | 5.514640902 |
| 1861 | 3.8020433 | 0.6894453 | SYCE1L      | 5.514640901 |
| 1862 | 2.8067273 | 0.5089592 | APOLD1      | 5.514640898 |
| 1863 | 0.9578834 | 0.1736982 | MROH8       | 5.514640895 |
| 1864 | 0.8071634 | 0.1463674 | TOX         | 5.514640877 |
| 1865 | 0.2142512 | 0.0388513 | RYR3        | 5.514640869 |
| 1866 | 178.1177  | 32.309856 | SERPINH1    | 5.512797771 |
| 1867 | 3.1111133 | 0.5668806 | HLA-L       | 5.488128201 |
| 1868 | 0.0548709 | 0.01      | FLJ36000    | 5.4870853   |
| 1869 | 0.0547555 | 0.01      | ESRP1       | 5.4755518   |
| 1870 | 70.192333 | 12.821267 | SYDE1       | 5.474679735 |
| 1871 | 49.291411 | 9.0168087 | TCIRG1      | 5.4666138   |
| 1872 | 0.0546407 | 0.01      | ELAVL2      | 5.4640666   |
| 1873 | 20.963997 | 3.8390066 | TNFSF9      | 5.460786983 |
| 1874 | 14.249002 | 2.6104089 | POMT1       | 5.458532633 |
| 1875 | 101.77821 | 18.735434 | UBAC2       | 5.432391283 |
| 1876 | 0.0541579 | 0.01      | CNGA3       | 5.4157874   |
| 1877 | 38.007286 | 7.021134  | SCPEP1      | 5.413268823 |
| 1878 | 0.0540736 | 0.01      | NEFL        | 5.407356    |
| 1879 | 131.09927 | 24.256103 | MALAT1      | 5.404795358 |
| 1880 | 67.119932 | 12.442674 | SLC44A2     | 5.394333287 |
| 1881 | 73.060663 | 13.544399 | FBLIM1      | 5.394160634 |
| 1882 | 13.523851 | 2.5076702 | HDAC6       | 5.39299441  |
| 1883 | 2.115731  | 0.3934944 | GAL3ST4     | 5.376774878 |
| 1884 | 2.8147465 | 0.5235009 | TMEM17      | 5.376774873 |
| 1885 | 0.0536007 | 0.01      | SLC26A4-AS1 | 5.3600694   |
| 1886 | 4.3268567 | 0.8119374 | RGMA        | 5.329052024 |
| 1887 | 69.816661 | 13.129135 | FOXF1       | 5.317689439 |
| 1888 | 0.053136  | 0.01      | TLR9        | 5.3136028   |
| 1889 | 4.3599406 | 0.8214149 | KIAA0513    | 5.307841863 |
| 1890 | 0.0530279 | 0.01      | LILRA6      | 5.3027863   |

|      |           |           |              |             |
|------|-----------|-----------|--------------|-------------|
| 1891 | 0.0530279 | 0.01      | ANKRD20A3    | 5.3027863   |
| 1892 | 8.1582236 | 1.5395125 | ABCG1        | 5.299225239 |
| 1893 | 0.052947  | 0.01      | ENPP6        | 5.2947027   |
| 1894 | 36.539291 | 6.9014482 | RBPMS        | 5.294438223 |
| 1895 | 43.327238 | 8.1841302 | EPHX1        | 5.294055263 |
| 1896 | 8.8876257 | 1.6795654 | TCTN1        | 5.291622333 |
| 1897 | 2.5327284 | 0.4792419 | WDR66        | 5.284864192 |
| 1898 | 17.143786 | 3.247064  | IRS2         | 5.279780638 |
| 1899 | 16.485334 | 3.1285039 | MIB2         | 5.269398456 |
| 1900 | 7.25611   | 1.3775786 | UTRN         | 5.267293034 |
| 1901 | 0.052666  | 0.01      | ZNF334       | 5.2666035   |
| 1902 | 242.13854 | 46.153154 | ICAM1        | 5.246413657 |
| 1903 | 2.913431  | 0.5558619 | ABCA1        | 5.241285858 |
| 1904 | 0.052388  | 0.01      | KCNK3        | 5.2388009   |
| 1905 | 25.639996 | 4.9017359 | LAMTOR2      | 5.230799087 |
| 1906 | 0.0521912 | 0.01      | ANKRD22      | 5.219121    |
| 1907 | 4.0968968 | 0.7866135 | PBX1         | 5.208271958 |
| 1908 | 0.0519052 | 0.01      | LOC100128946 | 5.190523    |
| 1909 | 0.0517249 | 0.01      | LOC100652824 | 5.172487    |
| 1910 | 0.051712  | 0.01      | CTCFL        | 5.1712035   |
| 1911 | 0.0847773 | 0.016398  | NOS1         | 5.169975952 |
| 1912 | 0.2287088 | 0.0442379 | SHC4         | 5.169975903 |
| 1913 | 0.5171203 | 0.1000237 | LOC400548    | 5.169975869 |
| 1914 | 0.3206146 | 0.0620147 | CHST5        | 5.169975865 |
| 1915 | 0.3737437 | 0.0722912 | ZNF396       | 5.169975864 |
| 1916 | 0.1599873 | 0.0309455 | MGAM         | 5.169975864 |
| 1917 | 0.6172971 | 0.1194004 | GFRA2        | 5.169975862 |
| 1918 | 0.2525442 | 0.0488482 | LINC00282    | 5.169975861 |
| 1919 | 0.3221012 | 0.0623023 | RASGRP4      | 5.169975859 |
| 1920 | 0.6380879 | 0.1234218 | FAM66C       | 5.169975856 |
| 1921 | 1.0371574 | 0.2006117 | CMPK2        | 5.169975854 |
| 1922 | 1.4052562 | 0.271811  | TM6SF2       | 5.169975852 |
| 1923 | 0.5772839 | 0.1116609 | LINC00092    | 5.169975849 |
| 1924 | 0.4132451 | 0.0799317 | FREM1        | 5.169975849 |
| 1925 | 0.1805575 | 0.0349243 | ZNF43        | 5.169975848 |
| 1926 | 0.3776722 | 0.0730511 | TTC39A       | 5.169975846 |
| 1927 | 1.7751235 | 0.3433524 | LOC729683    | 5.169975845 |
| 1928 | 6.4395365 | 1.2455641 | MSTO1        | 5.169975844 |
| 1929 | 1.1922168 | 0.2306039 | LINC00439    | 5.169975844 |
| 1930 | 0.4166323 | 0.0805869 | HOGA1        | 5.169975844 |
| 1931 | 1.481513  | 0.2865609 | PCDHB9       | 5.169975843 |
| 1932 | 3.3255239 | 0.6432378 | SLC51B       | 5.169975843 |
| 1933 | 5.7290384 | 1.1081364 | SSPN         | 5.169975842 |

|      |           |           |             |             |
|------|-----------|-----------|-------------|-------------|
| 1934 | 41.835165 | 8.0919459 | ST6GALNAC6  | 5.169975842 |
| 1935 | 7.7761008 | 1.5040884 | SNORA64     | 5.169975841 |
| 1936 | 0.3044996 | 0.0588977 | PCDHB12     | 5.169975841 |
| 1937 | 0.2219377 | 0.0429282 | DNAJC27-AS1 | 5.16997584  |
| 1938 | 0.7667384 | 0.148306  | LDB3        | 5.169975839 |
| 1939 | 0.6683756 | 0.1292802 | RHBDL1      | 5.169975838 |
| 1940 | 1.0430405 | 0.2017496 | LOC541473   | 5.169975834 |
| 1941 | 0.4007683 | 0.0775184 | LRRN4CL     | 5.169975831 |
| 1942 | 0.8700714 | 0.1682931 | CNNM1       | 5.169975831 |
| 1943 | 0.7948112 | 0.153736  | VN1R2       | 5.169975831 |
| 1944 | 0.6237638 | 0.1206512 | ZNF506      | 5.169975824 |
| 1945 | 0.6500296 | 0.1257317 | ATP6V1G2    | 5.169975823 |
| 1946 | 0.6837254 | 0.1322492 | MLANA       | 5.169975822 |
| 1947 | 0.4887418 | 0.0945346 | GNA15       | 5.169975814 |
| 1948 | 0.2712829 | 0.0524728 | MYOZ3       | 5.169975813 |
| 1949 | 0.3538192 | 0.0684373 | SLC6A16     | 5.169975803 |
| 1950 | 0.0581602 | 0.0112496 | MUC5B       | 5.169975717 |
| 1951 | 0.0516736 | 0.01      | PTPRQ       | 5.1673568   |
| 1952 | 0.0516608 | 0.01      | C7          | 5.1660759   |
| 1953 | 35.618636 | 6.9063617 | F3          | 5.157366145 |
| 1954 | 59.74306  | 11.610024 | LEPREL1     | 5.145817074 |
| 1955 | 239.92211 | 46.632639 | RAB34       | 5.144939638 |
| 1956 | 111.64518 | 21.707314 | PVRL2       | 5.14320574  |
| 1957 | 19.603845 | 3.8292223 | ANXA4       | 5.119537054 |
| 1958 | 0.0510533 | 0.01      | LINC00689   | 5.1053283   |
| 1959 | 11.824716 | 2.3215836 | KCNS3       | 5.093383608 |
| 1960 | 0.0509161 | 0.01      | MTTP        | 5.0916076   |
| 1961 | 8.9162948 | 1.7538609 | MAFIP       | 5.083809578 |
| 1962 | 103.38314 | 20.375919 | ECH1        | 5.073790243 |
| 1963 | 0.0506439 | 0.01      | MEIS1-AS3   | 5.0643864   |
| 1964 | 1.0448471 | 0.2066922 | NHS         | 5.055087491 |
| 1965 | 13.387045 | 2.6499529 | MXD3        | 5.051804966 |
| 1966 | 12.755054 | 2.5254188 | MSC         | 5.050668709 |
| 1967 | 5.1342365 | 1.0175073 | TENC1       | 5.045896421 |
| 1968 | 0.0504111 | 0.01      | CDH5        | 5.0411103   |
| 1969 | 5.5233303 | 1.0957409 | CTSO        | 5.040726447 |
| 1970 | 51.481112 | 10.213034 | PRAF2       | 5.040726445 |
| 1971 | 0.0503624 | 0.01      | SLC9C1      | 5.0362373   |
| 1972 | 37.175526 | 7.4000941 | ING1        | 5.023655771 |
| 1973 | 9.6731509 | 1.9260545 | SLC26A11    | 5.022262247 |
| 1974 | 0.0501563 | 0.01      | GOLGA6L4    | 5.0156318   |
| 1975 | 2.2355131 | 0.4461301 | ATOH8       | 5.010899664 |
| 1976 | 328.15302 | 65.607229 | ACTN4       | 5.00178143  |

|      |           |           |            |             |
|------|-----------|-----------|------------|-------------|
| 1977 | 37.589682 | 7.5214815 | CXXC5      | 4.997643315 |
| 1978 | 2.871062  | 0.5744832 | TMEM71     | 4.997643313 |
| 1979 | 7.84508   | 1.5775269 | LYPD1      | 4.973024381 |
| 1980 | 0.0497018 | 0.01      | COL21A1    | 4.9701765   |
| 1981 | 33.448947 | 6.7348226 | GPSM1      | 4.966566957 |
| 1982 | 2.2398513 | 0.4512939 | HSD3B7     | 4.963176806 |
| 1983 | 25.662185 | 5.1818797 | TP53I13    | 4.952292649 |
| 1984 | 172.74458 | 34.955447 | PXDN       | 4.941850113 |
| 1985 | 5.7591122 | 1.1657652 | TMEM150A   | 4.940199137 |
| 1986 | 0.0493137 | 0.01      | EDAR       | 4.9313654   |
| 1987 | 31.112186 | 6.3316393 | OPTN       | 4.913764651 |
| 1988 | 6.654774  | 1.3549435 | VANGL2     | 4.911477051 |
| 1989 | 3.7481924 | 0.7631497 | ARHGEF6    | 4.911477051 |
| 1990 | 37.121619 | 7.5680956 | NOMO1      | 4.905014581 |
| 1991 | 262.3084  | 53.536147 | SSR2       | 4.899650309 |
| 1992 | 25.414573 | 5.1983185 | IRF1       | 4.888998894 |
| 1993 | 0.0488284 | 0.01      | FGL2       | 4.8828374   |
| 1994 | 0.0487029 | 0.01      | HSPE1-MOB4 | 4.8702851   |
| 1995 | 4.7002988 | 0.965975  | SHANK2     | 4.865859614 |
| 1996 | 1.9656385 | 0.4044709 | DIAPH2     | 4.859777295 |
| 1997 | 124.27972 | 25.580796 | GSN        | 4.858320959 |
| 1998 | 59.978076 | 12.353742 | CYB561A3   | 4.855053456 |
| 1999 | 27.189559 | 5.6180585 | GBA        | 4.839671831 |
| 2000 | 0.0483189 | 0.01      | CDHR2      | 4.831892    |
| 2001 | 45.618954 | 9.4424678 | GPC4       | 4.831253287 |
| 2002 | 0.0482965 | 0.01      | CTAGE1     | 4.8296524   |
| 2003 | 0.5308575 | 0.1100152 | ATP1A2     | 4.825310803 |
| 2004 | 0.7498311 | 0.1553954 | ID4        | 4.825310793 |
| 2005 | 6.5368028 | 1.3546905 | DUSP10     | 4.825310784 |
| 2006 | 2.8594508 | 0.5925941 | DYNC1I1    | 4.825310782 |
| 2007 | 0.5369144 | 0.1112704 | ZNF772     | 4.825310767 |
| 2008 | 101.56766 | 21.063198 | PEPD       | 4.822043818 |
| 2009 | 8.385991  | 1.7400238 | SNED1      | 4.819469005 |
| 2010 | 0.0479631 | 0.01      | CDH12      | 4.7963061   |
| 2011 | 0.0477981 | 0.01      | IGSF22     | 4.779805    |
| 2012 | 0.0477324 | 0.01      | ITK        | 4.7732364   |
| 2013 | 1.5834782 | 0.3329168 | NPL        | 4.756377778 |
| 2014 | 0.9852392 | 0.2071406 | ARHGEF37   | 4.756377764 |
| 2015 | 9.6214593 | 2.0256065 | NGEF       | 4.749915305 |
| 2016 | 90.59665  | 19.119857 | C5orf15    | 4.738354006 |
| 2017 | 0.0473635 | 0.01      | GRIN1      | 4.7363523   |
| 2018 | 12.090616 | 2.5651544 | GPR124     | 4.713406548 |
| 2019 | 18.073585 | 3.8347599 | FLAD1      | 4.713094256 |

|      |           |           |              |             |
|------|-----------|-----------|--------------|-------------|
| 2020 | 2.0392314 | 0.432919  | BOLA3-AS1    | 4.710422439 |
| 2021 | 0.0470853 | 0.01      | KIF4B        | 4.7085291   |
| 2022 | 9.7272751 | 2.0667919 | CLGN         | 4.706460767 |
| 2023 | 36.776382 | 7.8292726 | CSRP2        | 4.697292336 |
| 2024 | 2.4137568 | 0.5149408 | ROR1         | 4.687444765 |
| 2025 | 0.0468419 | 0.01      | MAATS1       | 4.6841875   |
| 2026 | 3.7093762 | 0.7920281 | TGFA         | 4.683389883 |
| 2027 | 4.3457716 | 0.9279116 | HUNK         | 4.683389881 |
| 2028 | 11.954522 | 2.5568673 | BCAS3        | 4.675456416 |
| 2029 | 11.656384 | 2.4961979 | TMEM44       | 4.669655601 |
| 2030 | 33.432379 | 7.1711781 | ARL4D        | 4.662048391 |
| 2031 | 17.269242 | 3.704462  | JAZF1        | 4.661740929 |
| 2032 | 0.592044  | 0.1272398 | ZNF818P      | 4.65297828  |
| 2033 | 0.355968  | 0.0765033 | ADAMTS14     | 4.652978279 |
| 2034 | 0.4436129 | 0.0953396 | PAK6         | 4.652978268 |
| 2035 | 1.0003176 | 0.2149844 | C8orf31      | 4.652978265 |
| 2036 | 2.3817086 | 0.5118675 | CBR3-AS1     | 4.65297826  |
| 2037 | 5.6885479 | 1.2225606 | HLX          | 4.652978258 |
| 2038 | 4.3720175 | 0.939617  | PTGER4       | 4.652978258 |
| 2039 | 1.6021602 | 0.34433   | TMEM255A     | 4.652978257 |
| 2040 | 0.6941508 | 0.1491842 | KLHDC1       | 4.652978253 |
| 2041 | 1.123784  | 0.2415193 | C18orf32     | 4.652978249 |
| 2042 | 0.0464866 | 0.01      | SGK3         | 4.6486616   |
| 2043 | 0.0464762 | 0.01      | CILP         | 4.6476249   |
| 2044 | 9.8699319 | 2.1377793 | KLF11        | 4.616908659 |
| 2045 | 92.672724 | 20.088559 | CD70         | 4.613209212 |
| 2046 | 0.7024095 | 0.1523415 | CDKN2B-AS1   | 4.610755234 |
| 2047 | 2.191482  | 0.4793952 | PARD3B       | 4.57134706  |
| 2048 | 14.334357 | 3.1364433 | LOC100506990 | 4.570258643 |
| 2049 | 22.56166  | 4.9473185 | LZTS1        | 4.560381677 |
| 2050 | 31.374135 | 6.8871927 | TMCO3        | 4.555431544 |
| 2051 | 2.0708171 | 0.4551668 | SLC22A4      | 4.549578743 |
| 2052 | 0.3492906 | 0.0767743 | DNAH1        | 4.549578731 |
| 2053 | 0.9039952 | 0.1992017 | HMCN1        | 4.538089902 |
| 2054 | 13.443735 | 2.9682425 | AGFG2        | 4.529190103 |
| 2055 | 0.045255  | 0.01      | PCDHGA3      | 4.5255049   |
| 2056 | 11.657937 | 2.5770636 | TLL1         | 4.523728863 |
| 2057 | 4.1608571 | 0.9197848 | KRT7         | 4.523728863 |
| 2058 | 41.250087 | 9.121902  | FKBP9        | 4.522092794 |
| 2059 | 6.7894391 | 1.5037144 | TMCC2        | 4.515112237 |
| 2060 | 88.287001 | 19.561452 | MAGED2       | 4.513315403 |
| 2061 | 48.852942 | 10.832188 | TCEA2        | 4.509978926 |
| 2062 | 6.945588  | 1.5406501 | COL4A5       | 4.508218935 |



|      |           |           |           |             |
|------|-----------|-----------|-----------|-------------|
| 2063 | 6.044069  | 1.3444317 | PPP1R3F   | 4.495631168 |
| 2064 | 104.92316 | 23.339476 | EHD2      | 4.495523359 |
| 2065 | 22.884091 | 5.0977555 | TUBB2A    | 4.489052194 |
| 2066 | 93.510368 | 20.843981 | SAT1      | 4.486204843 |
| 2067 | 1.8049257 | 0.4028271 | ICAM4     | 4.480645729 |
| 2068 | 0.6450461 | 0.1439627 | GPR156    | 4.480645729 |
| 2069 | 1.2264344 | 0.2737182 | PODXL2    | 4.480645729 |
| 2070 | 1.0476386 | 0.2338142 | SEC14L1P1 | 4.480645727 |
| 2071 | 356.61502 | 79.670489 | MXRA7     | 4.476124392 |
| 2072 | 153.71547 | 34.376001 | CAPN1     | 4.471592613 |
| 2073 | 8.7526343 | 1.9588128 | STPG1     | 4.468336264 |
| 2074 | 4.5823982 | 1.02765   | CCBE1     | 4.459104162 |
| 2075 | 0.0445108 | 0.01      | ELAVL3    | 4.4510786   |
| 2076 | 157.29741 | 35.344666 | BOK       | 4.450386057 |
| 2077 | 0.0441805 | 0.01      | CDKL2     | 4.4180517   |
| 2078 | 5.9622566 | 1.3514608 | SLC35B3   | 4.41171272  |
| 2079 | 18.784952 | 4.2674983 | SHISA4    | 4.401865146 |
| 2080 | 0.9317006 | 0.2120161 | KIAA1656  | 4.394479469 |
| 2081 | 1.8480916 | 0.4205485 | ADPRHL1   | 4.394479468 |
| 2082 | 1.759956  | 0.4004925 | DEPDC7    | 4.394479467 |
| 2083 | 0.5683015 | 0.1293217 | PCDH9     | 4.394479453 |
| 2084 | 37.258979 | 8.4887782 | LAMB2     | 4.389203981 |
| 2085 | 5.8993497 | 1.3462165 | MPPE1     | 4.382170001 |
| 2086 | 28.68199  | 6.5660064 | AJUBA     | 4.36825495  |
| 2087 | 61.782153 | 14.157399 | TMEM98    | 4.363948112 |
| 2088 | 2.330472  | 0.5348123 | RNF165    | 4.35755107  |
| 2089 | 14.952052 | 3.431297  | RBM24     | 4.357551066 |
| 2090 | 1.6131181 | 0.3714483 | DRD2      | 4.342779709 |
| 2091 | 40.671202 | 9.3801356 | UBE2Q1    | 4.335886407 |
| 2092 | 0.0432903 | 0.01      | C4orf40   | 4.3290299   |
| 2093 | 0.0432723 | 0.01      | HRNR      | 4.3272321   |
| 2094 | 27.624105 | 6.3843129 | CLEC2B    | 4.32687209  |
| 2095 | 320.98505 | 74.195303 | CD99      | 4.32621788  |
| 2096 | 25.039239 | 5.8017528 | TRAFD1    | 4.31580592  |
| 2097 | 106.52103 | 24.6946   | PLD3      | 4.313535399 |
| 2098 | 71.558865 | 16.593297 | TUBA1A    | 4.312516435 |
| 2099 | 11.394177 | 2.6446956 | DDX19B    | 4.308313204 |
| 2100 | 2.8299769 | 0.6568642 | TNFRSF1B  | 4.308313204 |
| 2101 | 0.7385863 | 0.1714328 | KIAA1324  | 4.308313199 |
| 2102 | 2.0030709 | 0.4649316 | PALMD     | 4.308313199 |
| 2103 | 145.33123 | 33.752032 | FURIN     | 4.305851309 |
| 2104 | 73.259609 | 17.02995  | POR       | 4.301810088 |
| 2105 | 47.5843   | 11.08293  | SOCS3     | 4.293476626 |

|      |           |           |             |             |
|------|-----------|-----------|-------------|-------------|
| 2106 | 20.105075 | 4.6933963 | LOC728392   | 4.28369427  |
| 2107 | 8.346987  | 1.9516077 | HEXDC       | 4.276980015 |
| 2108 | 12.334863 | 2.8861267 | NKX2-2      | 4.273846697 |
| 2109 | 17.610527 | 4.1259497 | LARGE       | 4.268235871 |
| 2110 | 24.284826 | 5.7027686 | APOL2       | 4.25842747  |
| 2111 | 12.436744 | 2.9256946 | CLCF1       | 4.250869028 |
| 2112 | 9.4379211 | 2.2202333 | SERTAD4-AS1 | 4.250869027 |
| 2113 | 52.493329 | 12.366844 | PLXNB2      | 4.244682729 |
| 2114 | 157.05379 | 37.015271 | QSOX1       | 4.242945692 |
| 2115 | 40.89733  | 9.6419495 | SPOCD1      | 4.241603837 |
| 2116 | 10.911989 | 2.5754906 | NEURL1B     | 4.236858251 |
| 2117 | 3.6921171 | 0.872845  | DYRK1B      | 4.229980236 |
| 2118 | 20.487116 | 4.8433125 | TMBIM4      | 4.229980235 |
| 2119 | 4.5679384 | 1.0798959 | SLC22A23    | 4.229980233 |
| 2120 | 19.962863 | 4.7272292 | FBXL7       | 4.222952231 |
| 2121 | 8.8645052 | 2.1028267 | SH3BGR      | 4.215518763 |
| 2122 | 8.7167356 | 2.0687488 | KIF5A       | 4.213530311 |
| 2123 | 46.260508 | 10.987126 | ATF5        | 4.210428324 |
| 2124 | 14.260671 | 3.3914301 | RGS12       | 4.204913687 |
| 2125 | 22.146985 | 5.2669298 | SNAI1       | 4.204913685 |
| 2126 | 126.39929 | 30.064392 | MVP         | 4.204285595 |
| 2127 | 35.881284 | 8.5391366 | RETSAT      | 4.201980365 |
| 2128 | 5.7072416 | 1.3593049 | PIGN        | 4.198647049 |
| 2129 | 12.934172 | 3.08191   | SYNGR1      | 4.196803919 |
| 2130 | 13.445129 | 3.2036591 | C19orf66    | 4.196803917 |
| 2131 | 27.914061 | 6.6566261 | LHFP        | 4.193424849 |
| 2132 | 42.56464  | 10.173914 | STK40       | 4.183703526 |
| 2133 | 26.619862 | 6.3768084 | DAPK1       | 4.174480495 |
| 2134 | 43.603078 | 10.462209 | FARP1       | 4.167674012 |
| 2135 | 0.0416383 | 0.01      | HYMAI       | 4.1638262   |
| 2136 | 158.04975 | 38.018069 | DYNLT1      | 4.157227149 |
| 2137 | 0.0414148 | 0.01      | LOC390660   | 4.1414845   |
| 2138 | 0.0432006 | 0.0104451 | XIST        | 4.135980863 |
| 2139 | 0.1810202 | 0.0437672 | PCDHGA6     | 4.135980718 |
| 2140 | 0.2344861 | 0.0566942 | ANGPTL1     | 4.135980706 |
| 2141 | 0.3591547 | 0.0868366 | GRK4        | 4.135980696 |
| 2142 | 0.2817161 | 0.0681135 | SNAP25-AS1  | 4.135980694 |
| 2143 | 0.2231855 | 0.0539619 | PCA3        | 4.135980693 |
| 2144 | 0.2894438 | 0.0699819 | CXCR2       | 4.135980692 |
| 2145 | 0.4550207 | 0.1100152 | CCDC65      | 4.135980692 |
| 2146 | 0.249655  | 0.0603617 | CPNE5       | 4.135980691 |
| 2147 | 0.378049  | 0.0914049 | USP51       | 4.13598069  |
| 2148 | 0.5158403 | 0.1247202 | CD40        | 4.135980689 |

|      |           |           |              |             |
|------|-----------|-----------|--------------|-------------|
| 2149 | 0.3023569 | 0.073104  | TAT          | 4.135980687 |
| 2150 | 0.77544   | 0.1874864 | LOC100505702 | 4.135980686 |
| 2151 | 0.2582398 | 0.0624374 | CCDC62       | 4.135980685 |
| 2152 | 0.460043  | 0.1112295 | CLK2P        | 4.135980684 |
| 2153 | 0.3505458 | 0.0847552 | SLC23A1      | 4.135980684 |
| 2154 | 0.3709826 | 0.0896964 | ZNF570       | 4.135980684 |
| 2155 | 0.6502325 | 0.1572136 | TMIGD2       | 4.135980683 |
| 2156 | 0.3380365 | 0.0817307 | CCDC88B      | 4.135980681 |
| 2157 | 0.643705  | 0.1556354 | ZNF583       | 4.13598068  |
| 2158 | 0.7626697 | 0.1843988 | ROPN1L       | 4.13598068  |
| 2159 | 0.4412906 | 0.1066955 | FAM228A      | 4.13598068  |
| 2160 | 0.7675856 | 0.1855873 | PEX11G       | 4.135980679 |
| 2161 | 1.2864167 | 0.3110306 | IDO1         | 4.135980679 |
| 2162 | 0.2647183 | 0.0640038 | PLEKHG6      | 4.135980679 |
| 2163 | 0.4389668 | 0.1061337 | GOLGA8I      | 4.135980678 |
| 2164 | 0.5003589 | 0.1209771 | PODNL1       | 4.135980678 |
| 2165 | 0.4248716 | 0.1027257 | CHRNA10      | 4.135980678 |
| 2166 | 0.795165  | 0.1922555 | SPDYE6       | 4.135980678 |
| 2167 | 0.4644    | 0.1122829 | TEKT3        | 4.135980678 |
| 2168 | 0.624418  | 0.1509722 | JMJD1C-AS1   | 4.135980678 |
| 2169 | 2.1936789 | 0.5303891 | EME2         | 4.135980677 |
| 2170 | 0.397709  | 0.0961583 | LDHD         | 4.135980677 |
| 2171 | 1.4200988 | 0.3433524 | C5orf46      | 4.135980677 |
| 2172 | 2.1821937 | 0.5276122 | KDM5B-AS1    | 4.135980676 |
| 2173 | 0.676073  | 0.1634614 | SPATA4       | 4.135980675 |
| 2174 | 0.341219  | 0.0825001 | FLJ39639     | 4.135980675 |
| 2175 | 6.9730631 | 1.6859516 | N6AMT1       | 4.135980674 |
| 2176 | 6.0260096 | 1.4569724 | DGCR6        | 4.135980674 |
| 2177 | 7.0551914 | 1.7058086 | ENO3         | 4.135980674 |
| 2178 | 10.116481 | 2.445969  | HIST1H2BD    | 4.135980673 |
| 2179 | 1.6806411 | 0.4063465 | LOC100130417 | 4.135980673 |
| 2180 | 0.5602137 | 0.1354488 | RPL13AP3     | 4.135980673 |
| 2181 | 1.6848873 | 0.4073731 | IL24         | 4.135980673 |
| 2182 | 0.3895318 | 0.0941812 | FLJ36777     | 4.135980673 |
| 2183 | 8.33598   | 2.0154785 | MIR5047      | 4.135980673 |
| 2184 | 5.7969263 | 1.4015845 | SPATA24      | 4.135980672 |
| 2185 | 2.9249053 | 0.7071854 | SNCG         | 4.135980672 |
| 2186 | 0.9231429 | 0.2231981 | C11orf91     | 4.135980672 |
| 2187 | 10.006657 | 2.4194157 | SPPL2B       | 4.135980672 |
| 2188 | 0.2644664 | 0.0639428 | ATP6V0A4     | 4.135980671 |
| 2189 | 0.9814733 | 0.2373012 | ELMO3        | 4.135980671 |
| 2190 | 2.1651896 | 0.5235009 | GUSBP4       | 4.135980671 |
| 2191 | 1.6485129 | 0.3985785 | LOC91948     | 4.135980671 |

|      |           |           |             |             |
|------|-----------|-----------|-------------|-------------|
| 2192 | 0.5958528 | 0.1440657 | UBAP1L      | 4.135980671 |
| 2193 | 1.132606  | 0.2738422 | ABCC6P2     | 4.135980668 |
| 2194 | 1.0019207 | 0.242245  | MAP1LC3B2   | 4.135980667 |
| 2195 | 0.5870408 | 0.1419351 | STAT4       | 4.135980666 |
| 2196 | 0.8462924 | 0.2046171 | OR2A9P      | 4.135980666 |
| 2197 | 0.5498668 | 0.1329471 | C12orf77    | 4.135980665 |
| 2198 | 0.7697119 | 0.1861014 | GNRH1       | 4.135980665 |
| 2199 | 0.1823866 | 0.0440975 | SCN3A       | 4.135980664 |
| 2200 | 0.59799   | 0.1445824 | ZNF547      | 4.135980664 |
| 2201 | 0.4897756 | 0.1184182 | SHANK2-AS3  | 4.135980663 |
| 2202 | 0.5296048 | 0.1280482 | EGFLAM-AS4  | 4.135980659 |
| 2203 | 0.1665198 | 0.0402613 | ATP8A2      | 4.135980656 |
| 2204 | 0.2399534 | 0.0580161 | DNAH11      | 4.135980655 |
| 2205 | 0.182247  | 0.0440638 | LDLRAD4     | 4.13598065  |
| 2206 | 0.1704699 | 0.0412163 | N4BP2L2-IT2 | 4.135980645 |
| 2207 | 0.1291199 | 0.0312187 | SEC14L5     | 4.135980634 |
| 2208 | 0.1297429 | 0.0313693 | COL11A2     | 4.135980623 |
| 2209 | 0.0996531 | 0.0240942 | IMPG2       | 4.135980617 |
| 2210 | 12.819276 | 3.1058698 | MYLK        | 4.12743526  |
| 2211 | 51.637216 | 12.528532 | DAB2        | 4.12156959  |
| 2212 | 14.932968 | 3.6282881 | TSPYL2      | 4.11570626  |
| 2213 | 8.0855357 | 1.9649512 | SNPH        | 4.114878732 |
| 2214 | 43.206113 | 10.51277  | BHLHE41     | 4.109869685 |
| 2215 | 0.0408947 | 0.01      | ANKRD20A19P | 4.0894721   |
| 2216 | 2693.9562 | 658.82795 | FTL         | 4.08901324  |
| 2217 | 8.9374155 | 2.1863162 | CBX7        | 4.087887875 |
| 2218 | 2.6858531 | 0.6585335 | STX11       | 4.078536497 |
| 2219 | 3.5020734 | 0.8593713 | RNF207      | 4.075157429 |
| 2220 | 22.164633 | 5.4427129 | TBX3        | 4.072350201 |
| 2221 | 65.273735 | 16.035357 | FOXF2       | 4.070613163 |
| 2222 | 43.287389 | 10.660382 | ARL8A       | 4.060585192 |
| 2223 | 11.640188 | 2.8726003 | DHR SX      | 4.052143228 |
| 2224 | 211.2298  | 52.151766 | ANXA1       | 4.050290465 |
| 2225 | 9.3736177 | 2.3190652 | CXCR4       | 4.041981113 |
| 2226 | 251.84755 | 62.335139 | VAT1        | 4.040217932 |
| 2227 | 3.6459908 | 0.9030307 | EEPD1       | 4.037504942 |
| 2228 | 10.456842 | 2.5930891 | BR SK1      | 4.032581156 |
| 2229 | 19.894162 | 4.9414443 | FZD2        | 4.025981188 |
| 2230 | 40.932055 | 10.173827 | TNFAIP2     | 4.023270302 |
| 2231 | 119.63455 | 29.739709 | ECE1        | 4.022720895 |
| 2232 | 9.3793174 | 2.3325297 | CCDC22      | 4.021092321 |
| 2233 | 19.618217 | 4.8853199 | KRCC1       | 4.015748678 |
| 2234 | 16.820559 | 4.1916363 | SHROOM1     | 4.012886012 |

|      |           |           |           |             |
|------|-----------|-----------|-----------|-------------|
| 2235 | 145.51732 | 36.285395 | LAPTM4A   | 4.010355092 |
| 2236 | 2.3180425 | 0.5785371 | NRIP2     | 4.006731277 |
| 2237 | 16.569221 | 4.1400597 | FAM114A1  | 4.002169533 |
| 2238 | 20.778948 | 5.1990938 | ALX4      | 3.996647991 |
| 2239 | 41.994862 | 10.508918 | CHPF2     | 3.996116592 |
| 2240 | 8.7182933 | 2.1859853 | NICN1     | 3.988267079 |
| 2241 | 27.983923 | 7.0262    | STX12     | 3.982796204 |
| 2242 | 1060.734  | 266.50814 | CTGF      | 3.980118668 |
| 2243 | 15.886547 | 4.0013338 | H6PD      | 3.97031294  |
| 2244 | 37.842636 | 9.5340538 | IL10RB    | 3.96920726  |
| 2245 | 0.0396197 | 0.01      | PCDHA3    | 3.9619677   |
| 2246 | 0.0396197 | 0.01      | PCDHA1    | 3.9619677   |
| 2247 | 29.562102 | 7.4695049 | SDF2      | 3.957705644 |
| 2248 | 13.458285 | 3.4018595 | SOX13     | 3.956155429 |
| 2249 | 59.154265 | 14.984601 | STIM1     | 3.947670296 |
| 2250 | 26.539255 | 6.7375116 | ADAM15    | 3.939029214 |
| 2251 | 26.570801 | 6.751408  | FZD7      | 3.935594013 |
| 2252 | 20.614247 | 5.2387888 | SGSH      | 3.934926058 |
| 2253 | 1.2666636 | 0.3223734 | ANKDD1A   | 3.929181641 |
| 2254 | 4.2168163 | 1.0732047 | PAOX      | 3.92918164  |
| 2255 | 216.03572 | 54.985905 | ANXA6     | 3.928929139 |
| 2256 | 5.646674  | 1.4402705 | KBTBD11   | 3.920565012 |
| 2257 | 320.51228 | 81.763743 | SLC7A5    | 3.919980598 |
| 2258 | 0.0390334 | 0.01      | GOLGA8DP  | 3.9033433   |
| 2259 | 35.336764 | 9.0569734 | TWIST1    | 3.901608436 |
| 2260 | 16.809678 | 4.3090891 | ADRB2     | 3.900981773 |
| 2261 | 13.935529 | 3.5735434 | DIP2C     | 3.899638922 |
| 2262 | 17.156666 | 4.4092218 | KCTD13    | 3.891087082 |
| 2263 | 19.784536 | 5.0862719 | TOM1L2    | 3.889791348 |
| 2264 | 0.0388805 | 0.01      | PCDHA2    | 3.8880504   |
| 2265 | 6.1563649 | 1.5834997 | LPAR1     | 3.887821833 |
| 2266 | 66.474497 | 17.110179 | PSMB8     | 3.885084789 |
| 2267 | 1.0364697 | 0.2673048 | CA5B      | 3.877481884 |
| 2268 | 0.99112   | 0.2556092 | AGMAT     | 3.877481882 |
| 2269 | 4.3326299 | 1.1173824 | LOC728431 | 3.877481882 |
| 2270 | 1.5521313 | 0.4002936 | VSNL1     | 3.87748188  |
| 2271 | 1.0827823 | 0.2792488 | EXD3      | 3.877481878 |
| 2272 | 0.9683992 | 0.2497495 | MCF2L     | 3.877481877 |
| 2273 | 1.0790447 | 0.2782849 | RGL4      | 3.877481874 |
| 2274 | 900.30375 | 232.72174 | TIMP1     | 3.868584714 |
| 2275 | 4.3938115 | 1.1364551 | ELOVL2    | 3.866242805 |
| 2276 | 16.561859 | 4.2863321 | OSTM1     | 3.863876681 |
| 2277 | 0.038614  | 0.01      | LOC399829 | 3.8613952   |

|      |           |           |           |             |
|------|-----------|-----------|-----------|-------------|
| 2278 | 780.38575 | 202.42605 | CYR61     | 3.855164632 |
| 2279 | 4.4758405 | 1.1613548 | TM6SF1    | 3.853981991 |
| 2280 | 311.33209 | 80.883093 | HINT1     | 3.849161501 |
| 2281 | 1.861349  | 0.4846565 | PSMG3-AS1 | 3.840553487 |
| 2282 | 4.2068222 | 1.0953687 | PPP1R3C   | 3.840553481 |
| 2283 | 34.935097 | 9.0998357 | TEAD2     | 3.839090972 |
| 2284 | 33.367897 | 8.6957365 | SIRT2     | 3.837270958 |
| 2285 | 11.018824 | 2.872636  | CLK2      | 3.83578853  |
| 2286 | 4.2795467 | 1.1160933 | CRISPLD1  | 3.834398749 |
| 2287 | 17.162312 | 4.478841  | RAB20     | 3.831864448 |
| 2288 | 59.233883 | 15.471515 | GNG11     | 3.828576704 |
| 2289 | 237.01118 | 61.937996 | COL4A2    | 3.826587834 |
| 2290 | 189.59446 | 49.546957 | TAPBP     | 3.826561238 |
| 2291 | 8.3785672 | 2.1936572 | ARHGEF10L | 3.81945154  |
| 2292 | 74.236009 | 19.45474  | EXOC7     | 3.815831542 |
| 2293 | 4.463002  | 1.1705138 | FAS       | 3.812857183 |
| 2294 | 367.05956 | 96.302404 | CTSD      | 3.811530577 |
| 2295 | 44.401535 | 11.656685 | PINK1     | 3.809104782 |
| 2296 | 189.20127 | 49.801319 | GRN       | 3.79912162  |
| 2297 | 9.7264611 | 2.5603979 | BTN2A2    | 3.798808336 |
| 2298 | 127.31143 | 33.565879 | CD9       | 3.792882278 |
| 2299 | 0.2722882 | 0.0718189 | ZNF737    | 3.791315635 |
| 2300 | 0.774196  | 0.2042025 | MX2       | 3.791315624 |
| 2301 | 3.4317283 | 0.905155  | RWDD3     | 3.791315618 |
| 2302 | 31.740847 | 8.3719875 | DNAJC4    | 3.791315618 |
| 2303 | 20.361757 | 5.370631  | DDAH2     | 3.791315617 |
| 2304 | 3.1994341 | 0.8438849 | FN3K      | 3.791315617 |
| 2305 | 3.4113013 | 0.8997672 | ADIRF     | 3.791315617 |
| 2306 | 1.5842395 | 0.4178601 | ANXA10    | 3.791315617 |
| 2307 | 10.942217 | 2.8861267 | TRAPPC6A  | 3.791315616 |
| 2308 | 1.6635664 | 0.4387834 | ASMT      | 3.791315616 |
| 2309 | 1.805035  | 0.4760973 | AREG      | 3.791315616 |
| 2310 | 0.5349812 | 0.141107  | STAG3     | 3.791315614 |
| 2311 | 0.6178961 | 0.1629767 | PDK4      | 3.791315612 |
| 2312 | 0.3418933 | 0.090178  | TNFSF15   | 3.791315605 |
| 2313 | 396.53498 | 104.72786 | SQSTM1    | 3.786336872 |
| 2314 | 3.6386606 | 0.9631031 | ALPK1     | 3.778059268 |
| 2315 | 38.13428  | 10.104752 | ARHGEF7   | 3.773895725 |
| 2316 | 8.4201818 | 2.2328533 | PANX2     | 3.771041203 |
| 2317 | 21.129969 | 5.6096816 | HIBADH    | 3.766696684 |
| 2318 | 12.772002 | 3.3924756 | CRYZ      | 3.764802921 |
| 2319 | 11.500518 | 3.0556071 | PHF11     | 3.763742412 |
| 2320 | 1.2197805 | 0.3244112 | ABCA7     | 3.75998243  |

|      |           |           |           |             |
|------|-----------|-----------|-----------|-------------|
| 2321 | 23.248308 | 6.193187  | TMEM120A  | 3.753852024 |
| 2322 | 19.134975 | 5.1009755 | IRF9      | 3.751238286 |
| 2323 | 1.9939246 | 0.531964  | LRRC37B   | 3.748232484 |
| 2324 | 18.592232 | 4.9648937 | SGSM3     | 3.744739258 |
| 2325 | 7.5680952 | 2.0232143 | FGF2      | 3.74062958  |
| 2326 | 7.330069  | 1.9631284 | APOBEC3G  | 3.733871443 |
| 2327 | 9.9675993 | 2.6695079 | BTG2      | 3.733871442 |
| 2328 | 1.5962724 | 0.4275113 | ANK1      | 3.733871442 |
| 2329 | 21.077442 | 5.6464022 | A4GALT    | 3.732897812 |
| 2330 | 14.545185 | 3.9009261 | 2-Mar     | 3.728649245 |
| 2331 | 19.793289 | 5.311803  | DNASE2    | 3.726284476 |
| 2332 | 0.711936  | 0.1912582 | SMPD3     | 3.722382613 |
| 2333 | 3.3265069 | 0.8936499 | ACBD7     | 3.722382607 |
| 2334 | 13.610238 | 3.6563243 | CAMKK1    | 3.722382607 |
| 2335 | 8.5448542 | 2.2955336 | ATAT1     | 3.722382606 |
| 2336 | 11.026429 | 2.9706599 | FAM69A    | 3.711777527 |
| 2337 | 8.9908348 | 2.4225541 | TMEM19    | 3.711304087 |
| 2338 | 13.87949  | 3.7397878 | SMAD6     | 3.711304085 |
| 2339 | 20.664614 | 5.5716352 | NIPSNAP3A | 3.708895713 |
| 2340 | 0.0370752 | 0.01      | TRPM8     | 3.7075165   |
| 2341 | 37.397392 | 10.094698 | RARA      | 3.704656976 |
| 2342 | 18.13062  | 4.8964349 | CALCOCO1  | 3.702820536 |
| 2343 | 0.0369437 | 0.01      | CRB2      | 3.6943716   |
| 2344 | 4.0830623 | 1.10567   | EFNA4     | 3.692839887 |
| 2345 | 45.924845 | 12.484203 | B3GAT3    | 3.678636658 |
| 2346 | 43.461387 | 11.819035 | TXLNA     | 3.677236339 |
| 2347 | 62.308634 | 16.954532 | LRRC41    | 3.675043068 |
| 2348 | 5.7640688 | 1.5702988 | PLA2G4C   | 3.670682848 |
| 2349 | 54.847938 | 14.959914 | EXT2      | 3.666327192 |
| 2350 | 11.285421 | 3.0801332 | SUSD1     | 3.663939402 |
| 2351 | 17.313747 | 4.7340512 | MSRB3     | 3.657279208 |
| 2352 | 18.986089 | 5.1932574 | GRIPAP1   | 3.655911488 |
| 2353 | 34.924723 | 9.5551901 | CCDC92    | 3.655052688 |
| 2354 | 190.63164 | 52.169204 | NFE2L1    | 3.654102989 |
| 2355 | 25.38101  | 6.9499258 | SLC50A1   | 3.651982935 |
| 2356 | 0.0364717 | 0.01      | ESRRG     | 3.6471736   |
| 2357 | 50.603708 | 13.890981 | COLEC12   | 3.642918163 |
| 2358 | 160.32166 | 44.016715 | 9-Sep     | 3.642290357 |
| 2359 | 10.209774 | 2.8073427 | BTD       | 3.636810591 |
| 2360 | 85.375906 | 23.477439 | RRAS      | 3.636508432 |
| 2361 | 28.377804 | 7.82606   | MAPRE3    | 3.626065248 |
| 2362 | 0.2846432 | 0.0786528 | ABCC6     | 3.618983111 |
| 2363 | 0.6670309 | 0.1843144 | A2M-AS1   | 3.618983099 |

|      |           |           |              |             |
|------|-----------|-----------|--------------|-------------|
| 2364 | 0.9066479 | 0.2505256 | 1-Sep        | 3.618983097 |
| 2365 | 0.4040988 | 0.1116609 | GRHL1        | 3.618983096 |
| 2366 | 0.9363264 | 0.2587264 | PPP1R32      | 3.618983095 |
| 2367 | 0.9060848 | 0.25037   | AKR1B10      | 3.618983095 |
| 2368 | 1.7101952 | 0.4725624 | RPS14P3      | 3.618983093 |
| 2369 | 1.8465779 | 0.5102477 | VAMP8        | 3.618983093 |
| 2370 | 1.3573357 | 0.37506   | CSGALNACT1   | 3.618983092 |
| 2371 | 1.9373128 | 0.5353196 | FLJ39051     | 3.618983091 |
| 2372 | 3.0950421 | 0.8552242 | ARHGAP33     | 3.618983091 |
| 2373 | 0.5272123 | 0.1456797 | LINC00670    | 3.618983091 |
| 2374 | 10.664831 | 2.9469137 | TBC1D25      | 3.61898309  |
| 2375 | 3.4244049 | 0.946234  | FAHD2CP      | 3.61898309  |
| 2376 | 0.4671138 | 0.1290732 | CCDC176      | 3.618983089 |
| 2377 | 0.6460569 | 0.1785189 | ADAMTS9-AS2  | 3.618983088 |
| 2378 | 2.492604  | 0.6887581 | MTMR9LP      | 3.618983088 |
| 2379 | 3.1816718 | 0.8791618 | PTPRCAP      | 3.618983088 |
| 2380 | 0.952839  | 0.2632892 | RINL         | 3.618983086 |
| 2381 | 1.2619347 | 0.3486987 | LOC100505648 | 3.618983086 |
| 2382 | 0.2751408 | 0.0760271 | MTMR7        | 3.618983083 |
| 2383 | 0.9751314 | 0.269449  | C14orf64     | 3.618983083 |
| 2384 | 0.4399266 | 0.1215608 | LOC285696    | 3.618983081 |
| 2385 | 0.3263527 | 0.090178  | ZNF441       | 3.618983078 |
| 2386 | 0.3670852 | 0.1014332 | MAK          | 3.618983077 |
| 2387 | 18.940223 | 5.2414578 | SLC25A44     | 3.613541011 |
| 2388 | 81.874247 | 22.69352  | TRIB3        | 3.607824869 |
| 2389 | 47.30791  | 13.114415 | ATP6AP2      | 3.607321491 |
| 2390 | 19.980777 | 5.5395062 | DNAJB2       | 3.606959889 |
| 2391 | 4.9495957 | 1.3736223 | MVB12B       | 3.603316497 |
| 2392 | 216.70363 | 60.178315 | JUNB         | 3.60102522  |
| 2393 | 22.475278 | 6.2451446 | WDR13        | 3.598840327 |
| 2394 | 4.934882  | 1.371447  | OSBPL7       | 3.598303186 |
| 2395 | 4.9050987 | 1.3646638 | PER3         | 3.594364156 |
| 2396 | 39.062124 | 10.878441 | PSMB10       | 3.590783221 |
| 2397 | 0.0359062 | 0.01      | GRIA1        | 3.5906185   |
| 2398 | 336.65182 | 94.023128 | CNN2         | 3.580521332 |
| 2399 | 86.412745 | 24.140123 | MGAT1        | 3.579631567 |
| 2400 | 24.991358 | 6.9874502 | ME1          | 3.576606239 |
| 2401 | 18.504818 | 5.1741368 | CYTH1        | 3.576406819 |
| 2402 | 3.9301146 | 1.1002612 | DHRS12       | 3.57198331  |
| 2403 | 0.0357093 | 0.01      | FAM225B      | 3.5709304   |
| 2404 | 19.552202 | 5.477198  | YY1AP1       | 3.569745225 |
| 2405 | 6.465632  | 1.8124806 | HDHD1        | 3.567283331 |
| 2406 | 0.0356665 | 0.01      | GNRHR        | 3.5666524   |



|      |           |           |              |             |
|------|-----------|-----------|--------------|-------------|
| 2407 | 30.074821 | 8.4338691 | BCL3         | 3.565957696 |
| 2408 | 1.0130758 | 0.2844489 | PLXNB3       | 3.561538917 |
| 2409 | 12.045991 | 3.387046  | LMO4         | 3.556488876 |
| 2410 | 12.120355 | 3.4141363 | PLEKHM1      | 3.550050078 |
| 2411 | 0.9759196 | 0.2752849 | TTC28-AS1    | 3.545126299 |
| 2412 | 1.7617429 | 0.4969478 | SLC27A6      | 3.545126295 |
| 2413 | 0.7921425 | 0.2234455 | KAL1         | 3.545126289 |
| 2414 | 52.495971 | 14.812183 | LGALS3       | 3.544107579 |
| 2415 | 67.178621 | 18.974047 | TFE3         | 3.540553115 |
| 2416 | 23.950872 | 6.766844  | BMP1         | 3.539445    |
| 2417 | 4.5724471 | 1.294278  | RASA4        | 3.532816826 |
| 2418 | 77.883609 | 22.067283 | ISG15        | 3.529370174 |
| 2419 | 156.1363  | 44.407318 | DNAJB1       | 3.516003895 |
| 2420 | 1.3486073 | 0.3836084 | ST8SIA5      | 3.515583575 |
| 2421 | 6.2630374 | 1.7815072 | FNDC4        | 3.515583574 |
| 2422 | 14.498535 | 4.1279306 | KREMEN1      | 3.512301049 |
| 2423 | 39.959481 | 11.392904 | NCKAP5L      | 3.507400877 |
| 2424 | 23.624791 | 6.7415082 | IQGAP3       | 3.504377713 |
| 2425 | 0.0350192 | 0.01      | HEPHL1       | 3.501924    |
| 2426 | 29.982352 | 8.5704258 | ZNF428       | 3.49835032  |
| 2427 | 3.8704688 | 1.1066904 | COL5A3       | 3.4973366   |
| 2428 | 33.581537 | 9.6142661 | HTATIP2      | 3.492886118 |
| 2429 | 15.709183 | 4.499127  | RHBDF1       | 3.491606873 |
| 2430 | 15.773357 | 4.5199313 | GLIPR1       | 3.489733692 |
| 2431 | 21.614341 | 6.2094939 | MGAT5B       | 3.480853965 |
| 2432 | 34.290901 | 9.8566446 | FN3KRP       | 3.478962911 |
| 2433 | 3.5160882 | 1.0109559 | RHOU         | 3.477983747 |
| 2434 | 21.978314 | 6.3222148 | SCRN2        | 3.476363066 |
| 2435 | 4.445758  | 1.2792176 | SEMA3A       | 3.475372649 |
| 2436 | 1.3603724 | 0.3923859 | ATRNL1       | 3.466924979 |
| 2437 | 35.911637 | 10.358354 | ATP2B4       | 3.466924978 |
| 2438 | 41.287542 | 11.923333 | COL12A1      | 3.462751702 |
| 2439 | 0.0346179 | 0.01      | UTY          | 3.4617857   |
| 2440 | 61.902588 | 17.909047 | CANT1        | 3.456498134 |
| 2441 | 44.653576 | 12.92754  | SLC38A10     | 3.45414328  |
| 2442 | 0.2212544 | 0.064194  | LOC100216546 | 3.446650574 |
| 2443 | 0.9693    | 0.2812296 | UBE2Q2P1     | 3.446650564 |
| 2444 | 2.2460877 | 0.6516726 | CDH23        | 3.446650563 |
| 2445 | 0.9128318 | 0.2648461 | SOX5         | 3.446650563 |
| 2446 | 2.0062527 | 0.5820876 | KIAA1614     | 3.446650562 |
| 2447 | 5.9330819 | 1.7214051 | SVIP         | 3.446650562 |
| 2448 | 0.3747518 | 0.1087293 | DSG3         | 3.446650559 |
| 2449 | 0.5717407 | 0.165883  | LOC100093631 | 3.446650556 |

|      |           |           |              |             |
|------|-----------|-----------|--------------|-------------|
| 2450 | 24.013802 | 6.9835273 | SMPD1        | 3.438635096 |
| 2451 | 25.507404 | 7.4264667 | CAV2         | 3.434662212 |
| 2452 | 28.669324 | 8.3514301 | FAH          | 3.432863959 |
| 2453 | 486.3415  | 142.00964 | HSPB1        | 3.424707599 |
| 2454 | 0.0342312 | 0.01      | ZNF626       | 3.4231193   |
| 2455 | 6.0025059 | 1.7536416 | SLC17A5      | 3.422880559 |
| 2456 | 15.876396 | 4.6400718 | GPRC5C       | 3.421584012 |
| 2457 | 2.1766283 | 0.6364154 | RBMS3        | 3.420137866 |
| 2458 | 6.5891018 | 1.9265603 | HDAC10       | 3.420137865 |
| 2459 | 3.445282  | 1.0073518 | NOV          | 3.420137864 |
| 2460 | 0.7582652 | 0.221706  | SOGA3        | 3.420137862 |
| 2461 | 32.135553 | 9.3999206 | GALNS        | 3.418704746 |
| 2462 | 6.6767393 | 1.9539593 | ZNF469       | 3.417030908 |
| 2463 | 10.211686 | 2.9948734 | MAPK8IP3     | 3.409722161 |
| 2464 | 35.754816 | 10.497284 | MTX1         | 3.40610173  |
| 2465 | 3.5067224 | 1.0295413 | CROCC        | 3.40610173  |
| 2466 | 25.391636 | 7.457998  | MPP1         | 3.404618238 |
| 2467 | 9.6053995 | 2.8233092 | CCDC71L      | 3.402177651 |
| 2468 | 14.466934 | 4.2522572 | TRIB2        | 3.402177651 |
| 2469 | 1.0991031 | 0.3235118 | OXTR         | 3.3974127   |
| 2470 | 3.8717193 | 1.1396082 | LOC100288778 | 3.397412696 |
| 2471 | 2.430623  | 0.7154335 | CLDN23       | 3.397412695 |
| 2472 | 386.13955 | 113.75497 | TNIP1        | 3.394485039 |
| 2473 | 16.903355 | 4.9796741 | TRIOBP       | 3.394470194 |
| 2474 | 12.356297 | 3.6433089 | B3GNTL1      | 3.391504153 |
| 2475 | 4.5860441 | 1.3539235 | NOMO2        | 3.387225552 |
| 2476 | 7.3842343 | 2.1821125 | FKBP1B       | 3.383984188 |
| 2477 | 2.9409573 | 0.8690813 | TMEM25       | 3.383984186 |
| 2478 | 5.1354408 | 1.5220227 | LOC100499489 | 3.374089497 |
| 2479 | 26.439181 | 7.8414443 | SESN2        | 3.371723375 |
| 2480 | 29.044017 | 8.6169818 | NAGK         | 3.370555679 |
| 2481 | 16.258117 | 4.8242836 | CBR3         | 3.370058326 |
| 2482 | 100.0866  | 29.701788 | CCL2         | 3.369716399 |
| 2483 | 11.946784 | 3.5477024 | CRY2         | 3.367470753 |
| 2484 | 223.65743 | 66.494394 | CTTN         | 3.363553232 |
| 2485 | 0.7494311 | 0.2230128 | LOC100216545 | 3.360484302 |
| 2486 | 1.6795992 | 0.4998087 | CAPS         | 3.360484299 |
| 2487 | 7.7185    | 2.2968416 | LOC100127983 | 3.360484297 |
| 2488 | 1.6213007 | 0.4824604 | FCAR         | 3.360484297 |
| 2489 | 42.199951 | 12.573819 | F2R          | 3.356175985 |
| 2490 | 0.0335587 | 0.01      | ZNF585B      | 3.3558696   |
| 2491 | 9.4229006 | 2.8081062 | MBOAT2       | 3.355606961 |
| 2492 | 14.316701 | 4.268317  | CCBL1        | 3.354179449 |

|      |           |           |          |             |
|------|-----------|-----------|----------|-------------|
| 2493 | 13.810231 | 4.1173202 | BRF2     | 3.354179448 |
| 2494 | 4.5634927 | 1.3660699 | SLC35A1  | 3.340599776 |
| 2495 | 3.151883  | 0.9435081 | PPP1R12B | 3.340599775 |
| 2496 | 12.61336  | 3.7783474 | PORCN    | 3.338327257 |
| 2497 | 17.38237  | 5.2077186 | SRPX2    | 3.337808964 |
| 2498 | 140.16133 | 42.066033 | CYB5R3   | 3.331936018 |
| 2499 | 1.3996261 | 0.4200858 | PTAFR    | 3.331762212 |
| 2500 | 25.256775 | 7.5806056 | CYB5R1   | 3.33176221  |
| 2501 | 2.2961951 | 0.6891834 | OPN3     | 3.33176221  |
| 2502 | 5.206995  | 1.5628351 | PITX2    | 3.331762209 |
| 2503 | 73.055175 | 21.93971  | RPS27L   | 3.329814949 |
| 2504 | 57.145721 | 17.16802  | ARAF     | 3.328614584 |
| 2505 | 2449.5832 | 736.37191 | LGALS1   | 3.326557085 |
| 2506 | 18.054685 | 5.4299737 | FCGRT    | 3.325004071 |
| 2507 | 209.84557 | 63.133545 | ITGA3    | 3.323836368 |
| 2508 | 0.0332164 | 0.01      | LCT      | 3.3216369   |
| 2509 | 46.736101 | 14.074976 | RBCK1    | 3.320510257 |
| 2510 | 18.31839  | 5.5228414 | SERPINB1 | 3.316841645 |
| 2511 | 29.386875 | 8.8638844 | CRAT     | 3.315349588 |
| 2512 | 7.1020064 | 2.1464094 | NEAT1    | 3.308784539 |
| 2513 | 4.5776936 | 1.383497  | B3GALNT1 | 3.308784539 |
| 2514 | 2.0123066 | 0.6081709 | DLEU2L   | 3.308784539 |
| 2515 | 14.206174 | 4.2934721 | SLC35D2  | 3.308784538 |
| 2516 | 1.2507097 | 0.3779967 | GPC2     | 3.308784534 |
| 2517 | 51.388036 | 15.538985 | SYVN1    | 3.3070394   |
| 2518 | 52.694817 | 15.946282 | GSTK1    | 3.30452064  |
| 2519 | 51.9541   | 15.73359  | MAP3K11  | 3.302113601 |
| 2520 | 25.591425 | 7.7550134 | TMUB2    | 3.29998458  |
| 2521 | 434.26671 | 131.62787 | IL8      | 3.299200272 |
| 2522 | 12.538097 | 3.8027896 | PDGFA    | 3.297078934 |
| 2523 | 136.96545 | 41.591088 | CTSL1    | 3.293144275 |
| 2524 | 11.453415 | 3.480085  | TLE4     | 3.291130963 |
| 2525 | 377.57461 | 114.72961 | GANAB    | 3.290995375 |
| 2526 | 10.198997 | 3.1000135 | FGD1     | 3.289984629 |
| 2527 | 140.84098 | 42.960489 | NUCB1    | 3.278383956 |
| 2528 | 52.85366  | 16.123828 | IER5     | 3.277984684 |
| 2529 | 2.7338945 | 0.8349508 | DCLK2    | 3.274318035 |
| 2530 | 1.1156919 | 0.3407402 | GIN1     | 3.274318032 |
| 2531 | 2.3182614 | 0.7080135 | VMAC     | 3.274318032 |
| 2532 | 79.777934 | 24.406185 | COMT     | 3.268758919 |
| 2533 | 13.931644 | 4.2645819 | DMPK     | 3.266825315 |
| 2534 | 10.288235 | 3.154873  | CASP6    | 3.261061685 |
| 2535 | 10.936637 | 3.3554835 | PELI3    | 3.259332597 |

|      |           |           |              |             |
|------|-----------|-----------|--------------|-------------|
| 2536 | 1.8501973 | 0.5693442 | PIK3IP1      | 3.249699101 |
| 2537 | 3.8568151 | 1.1868222 | BDNF         | 3.249699099 |
| 2538 | 59.243368 | 18.238791 | PCBP4        | 3.248207044 |
| 2539 | 15.965521 | 4.9191339 | MAGEH1       | 3.245595945 |
| 2540 | 2.7729719 | 0.8546407 | HECW1        | 3.244605528 |
| 2541 | 17.625513 | 5.4571824 | AKAP17A      | 3.22978266  |
| 2542 | 29.410293 | 9.1107627 | ZFAND2A      | 3.228082477 |
| 2543 | 0.03224   | 0.01      | COL14A1      | 3.2240022   |
| 2544 | 10.549354 | 3.2725056 | RNASEK       | 3.223631996 |
| 2545 | 30.317393 | 9.4094868 | TSC22D4      | 3.222002802 |
| 2546 | 17.262633 | 5.3638815 | C1QTNF1      | 3.218309962 |
| 2547 | 3.4878577 | 1.0842383 | OAS1         | 3.216873859 |
| 2548 | 44.188126 | 13.745982 | ADAR         | 3.214621146 |
| 2549 | 130.13128 | 40.481343 | TMEM132A     | 3.214598841 |
| 2550 | 29.280938 | 9.1139207 | SPG7         | 3.212770702 |
| 2551 | 75.060705 | 23.365281 | ANAPC11      | 3.212488805 |
| 2552 | 13.679308 | 4.2594512 | MEGF8        | 3.211518893 |
| 2553 | 5.6402868 | 1.7596285 | PXMP4        | 3.205385023 |
| 2554 | 0.0319582 | 0.01      | PRICKLE2-AS1 | 3.1958212   |
| 2555 | 6.94665   | 2.1763383 | CXorf38      | 3.191898128 |
| 2556 | 1.8776083 | 0.5883442 | SYNE1        | 3.191343115 |
| 2557 | 118.10509 | 37.026121 | KRTCAP2      | 3.189777549 |
| 2558 | 2.8442573 | 0.8921336 | LOC374443    | 3.188151771 |
| 2559 | 2.5310295 | 0.7938862 | ADAM12       | 3.18815177  |
| 2560 | 5.0102544 | 1.5715232 | EP400NL      | 3.188151769 |
| 2561 | 50.872391 | 15.960268 | MGST3        | 3.187439652 |
| 2562 | 37.27648  | 11.700738 | TSPAN13      | 3.185822951 |
| 2563 | 65.943556 | 20.730636 | ZFPL1        | 3.180971247 |
| 2564 | 32.110319 | 10.101281 | TXNIP        | 3.178836498 |
| 2565 | 6.240375  | 1.9649512 | MEIS3P1      | 3.175842303 |
| 2566 | 21.838271 | 6.879178  | CYHR1        | 3.17454657  |
| 2567 | 28.696579 | 9.0431473 | WIP1         | 3.173295517 |
| 2568 | 1.6997122 | 0.5360315 | PLCB4        | 3.170918518 |
| 2569 | 3.195459  | 1.0077392 | FBXL2        | 3.170918516 |
| 2570 | 7.0744754 | 2.2379996 | CTBS         | 3.161070943 |
| 2571 | 15.621206 | 4.9455438 | GPKOW        | 3.158642774 |
| 2572 | 15.512236 | 4.9114451 | ACSF2        | 3.158385241 |
| 2573 | 84.100535 | 26.645901 | PDLIM4       | 3.156227875 |
| 2574 | 1.0999714 | 0.3487892 | ZC3H6        | 3.153685263 |
| 2575 | 10.789915 | 3.4286986 | GSTA4        | 3.146941817 |
| 2576 | 32.85645  | 10.457263 | PLXND1       | 3.141974269 |
| 2577 | 20.075181 | 6.3946756 | TTC38        | 3.139358825 |
| 2578 | 18.642562 | 5.9479229 | DNM1         | 3.134297854 |

|      |           |           |           |             |
|------|-----------|-----------|-----------|-------------|
| 2579 | 9.625843  | 3.0720919 | CASP9     | 3.133318692 |
| 2580 | 17.452175 | 5.5752152 | YPEL5     | 3.13031414  |
| 2581 | 275.53084 | 88.023808 | CTNNA1    | 3.130185374 |
| 2582 | 5.740229  | 1.8348193 | CLIP4     | 3.128498202 |
| 2583 | 45.190703 | 14.451395 | PIGS      | 3.127082475 |
| 2584 | 33.872577 | 10.834996 | HBEGF     | 3.126219768 |
| 2585 | 12.575832 | 4.0236412 | WTIP      | 3.125485396 |
| 2586 | 9.34738   | 2.991675  | FENDRR    | 3.124463661 |
| 2587 | 11.333868 | 3.6280156 | C21orf2   | 3.123985404 |
| 2588 | 29.262928 | 9.3698715 | EVA1B     | 3.123087448 |
| 2589 | 64.389214 | 20.623501 | GGH       | 3.122128268 |
| 2590 | 105.73549 | 33.937865 | SKP1      | 3.115560934 |
| 2591 | 0.3532794 | 0.1134203 | HIF3A     | 3.114781188 |
| 2592 | 511.25601 | 164.3178  | AES       | 3.111385462 |
| 2593 | 0.031109  | 0.01      | LOC642366 | 3.1109046   |
| 2594 | 0.1177177 | 0.0379491 | LUZP2     | 3.101985545 |
| 2595 | 0.09841   | 0.0317248 | PLIN4     | 3.101985543 |
| 2596 | 0.0739617 | 0.0238434 | TG        | 3.101985539 |
| 2597 | 0.1357651 | 0.0437672 | PCDHGA9   | 3.101985538 |
| 2598 | 0.1618427 | 0.0521739 | F13A1     | 3.101985536 |
| 2599 | 0.1680189 | 0.054165  | C2orf91   | 3.101985531 |
| 2600 | 0.1319263 | 0.0425296 | PROM2     | 3.101985522 |
| 2601 | 0.250681  | 0.0808131 | SERINC4   | 3.10198552  |
| 2602 | 0.0855382 | 0.0275753 | GOLGA6L5  | 3.10198552  |
| 2603 | 0.2384434 | 0.076868  | CLEC7A    | 3.10198552  |
| 2604 | 0.1664533 | 0.0536602 | KCNB1     | 3.101985519 |
| 2605 | 0.2065406 | 0.0665834 | TGM4      | 3.101985518 |
| 2606 | 0.366363  | 0.118106  | LOC286367 | 3.101985518 |
| 2607 | 0.2733706 | 0.0881276 | GUCA1B    | 3.101985517 |
| 2608 | 0.2858704 | 0.0921572 | TPTE2P5   | 3.101985517 |
| 2609 | 0.3178437 | 0.1024646 | PATL2     | 3.101985516 |
| 2610 | 0.3664704 | 0.1181406 | LOC727896 | 3.101985516 |
| 2611 | 0.2038802 | 0.0657257 | TRPV3     | 3.101985516 |
| 2612 | 0.17817   | 0.0574374 | ZNF677    | 3.101985513 |
| 2613 | 0.5041923 | 0.1625386 | WNT9A     | 3.101985513 |
| 2614 | 0.3037894 | 0.0979338 | NDP       | 3.101985512 |
| 2615 | 0.4725612 | 0.1523415 | PILRA     | 3.101985511 |
| 2616 | 0.0520089 | 0.0167663 | SLC1A2    | 3.101985511 |
| 2617 | 0.4913427 | 0.1583962 | MDGA1     | 3.10198551  |
| 2618 | 0.225378  | 0.072656  | KCP       | 3.10198551  |
| 2619 | 0.4743539 | 0.1529195 | LDHC      | 3.10198551  |
| 2620 | 1.0071663 | 0.3246844 | BTN2A3P   | 3.10198551  |
| 2621 | 0.8220888 | 0.2650202 | IFNLR1    | 3.101985509 |

|      |           |           |              |             |
|------|-----------|-----------|--------------|-------------|
| 2622 | 0.4752554 | 0.1532101 | DEPTOR       | 3.101985509 |
| 2623 | 1.1840881 | 0.3817194 | ADM5         | 3.101985509 |
| 2624 | 0.4930588 | 0.1589494 | FAM86B2      | 3.101985509 |
| 2625 | 0.3705978 | 0.1194712 | LOC154092    | 3.101985508 |
| 2626 | 0.7800356 | 0.2514633 | ACOT1        | 3.101985508 |
| 2627 | 0.4805523 | 0.1549176 | AKR7A3       | 3.101985508 |
| 2628 | 1.6551319 | 0.5335718 | TP53INP1     | 3.101985508 |
| 2629 | 0.5410632 | 0.1744248 | MLLT4-AS1    | 3.101985508 |
| 2630 | 1.6973715 | 0.5471887 | ADC          | 3.101985508 |
| 2631 | 0.4736352 | 0.1526878 | CD27         | 3.101985508 |
| 2632 | 0.1492833 | 0.0481251 | ZNF813       | 3.101985507 |
| 2633 | 0.7051111 | 0.2273096 | TUBBP5       | 3.101985507 |
| 2634 | 0.26925   | 0.0867992 | BDNF-AS      | 3.101985507 |
| 2635 | 0.33649   | 0.1084757 | INHBA-AS1    | 3.101985506 |
| 2636 | 2.8073574 | 0.9050195 | RRAGB        | 3.101985506 |
| 2637 | 0.2306155 | 0.0743445 | PCDHB8       | 3.101985506 |
| 2638 | 0.2485879 | 0.0801383 | BHMT         | 3.101985506 |
| 2639 | 4.1959631 | 1.3526701 | RNU12        | 3.101985506 |
| 2640 | 2.3832217 | 0.7682891 | INCA1        | 3.101985506 |
| 2641 | 5.10734   | 1.6464745 | ANO8         | 3.101985506 |
| 2642 | 0.2394479 | 0.0771918 | LOC100506655 | 3.101985506 |
| 2643 | 9.035904  | 2.912942  | ZSCAN25      | 3.101985506 |
| 2644 | 0.9530465 | 0.3072376 | NAPA-AS1     | 3.101985505 |
| 2645 | 6.1293971 | 1.9759593 | RNY3         | 3.101985505 |
| 2646 | 6.8675181 | 2.2139104 | ADCK4        | 3.101985505 |
| 2647 | 2.7123579 | 0.8743941 | RAMP1        | 3.101985505 |
| 2648 | 13.04438  | 4.2051712 | C19orf71     | 3.101985505 |
| 2649 | 3.9569525 | 1.2756193 | RNU105A      | 3.101985505 |
| 2650 | 0.65329   | 0.2106038 | HLA-F-AS1    | 3.101985505 |
| 2651 | 2.4711403 | 0.7966318 | PMS2P4       | 3.101985505 |
| 2652 | 4.4577433 | 1.4370613 | SMIM14       | 3.101985505 |
| 2653 | 3.8434334 | 1.2390237 | KIAA0895L    | 3.101985504 |
| 2654 | 0.2497797 | 0.0805225 | IL21R        | 3.101985504 |
| 2655 | 0.2497797 | 0.0805225 | LOC283299    | 3.101985504 |
| 2656 | 4.3720175 | 1.4094255 | TREX1        | 3.101985504 |
| 2657 | 35.918047 | 11.57905  | TMEM134      | 3.101985504 |
| 2658 | 1.8802962 | 0.6061589 | TSSK3        | 3.101985504 |
| 2659 | 0.2760258 | 0.0889836 | LOC729987    | 3.101985504 |
| 2660 | 0.4494597 | 0.1448942 | LOC100130015 | 3.101985503 |
| 2661 | 0.8098426 | 0.2610723 | LOC728875    | 3.101985503 |
| 2662 | 0.758736  | 0.2445969 | NDUFB2-AS1   | 3.101985503 |
| 2663 | 0.758736  | 0.2445969 | CHKB         | 3.101985503 |
| 2664 | 0.5912043 | 0.190589  | LINC00324    | 3.101985503 |

|      |           |           |              |             |
|------|-----------|-----------|--------------|-------------|
| 2665 | 0.8369458 | 0.2698097 | ZP3          | 3.101985502 |
| 2666 | 0.4573508 | 0.1474381 | DCDC2B       | 3.101985502 |
| 2667 | 0.3594128 | 0.1158654 | CCR6         | 3.101985501 |
| 2668 | 1.3924243 | 0.4488816 | HIST1H2BN    | 3.101985501 |
| 2669 | 0.9915916 | 0.3196635 | AURKC        | 3.101985501 |
| 2670 | 0.9915916 | 0.3196635 | LOC100652768 | 3.101985501 |
| 2671 | 0.1578784 | 0.0508959 | MLC1         | 3.101985501 |
| 2672 | 0.2366383 | 0.0762861 | MST1P2       | 3.101985501 |
| 2673 | 0.5670735 | 0.1828098 | ZNF660       | 3.101985501 |
| 2674 | 0.214771  | 0.0692366 | LOC100630923 | 3.101985501 |
| 2675 | 0.2608254 | 0.0840834 | FOXP3        | 3.101985501 |
| 2676 | 0.6788257 | 0.2188359 | HIST1H3D     | 3.101985501 |
| 2677 | 0.8570233 | 0.2762822 | CPT1C        | 3.101985501 |
| 2678 | 0.4590297 | 0.1479793 | MIRLET7DHG   | 3.1019855   |
| 2679 | 0.3316703 | 0.1069219 | REM2         | 3.1019855   |
| 2680 | 0.363699  | 0.1172471 | EXOC3L2      | 3.1019855   |
| 2681 | 0.2455611 | 0.0791625 | NOS3         | 3.1019855   |
| 2682 | 0.2553915 | 0.0823316 | GP2          | 3.101985498 |
| 2683 | 0.2412962 | 0.0777877 | LINC-ROR     | 3.101985497 |
| 2684 | 0.1839901 | 0.0593137 | TMEM213      | 3.101985497 |
| 2685 | 0.3939499 | 0.1269993 | PVRIG        | 3.101985496 |
| 2686 | 0.5501087 | 0.1773408 | LOC284276    | 3.101985496 |
| 2687 | 0.3504476 | 0.1129753 | GLIPR1L2     | 3.101985496 |
| 2688 | 0.4614011 | 0.1487438 | PAX8         | 3.101985495 |
| 2689 | 0.4276324 | 0.1378576 | PRSS27       | 3.101985494 |
| 2690 | 0.4540294 | 0.1463674 | AARSD1       | 3.101985494 |
| 2691 | 0.4835255 | 0.1558761 | SCG2         | 3.101985494 |
| 2692 | 0.3927126 | 0.1266004 | CIDEA        | 3.101985494 |
| 2693 | 0.4750748 | 0.1531519 | FMO5         | 3.101985493 |
| 2694 | 0.2546633 | 0.0820969 | HNF1A-AS1    | 3.101985492 |
| 2695 | 0.2200241 | 0.0709301 | NBPF24       | 3.101985492 |
| 2696 | 0.1544844 | 0.0498018 | PRND         | 3.101985489 |
| 2697 | 0.0804528 | 0.0259359 | GRIN3A       | 3.101985488 |
| 2698 | 0.1208113 | 0.0389464 | LRRC37A2     | 3.101985486 |
| 2699 | 0.2484891 | 0.0801065 | LOC654841    | 3.101985485 |
| 2700 | 0.2411101 | 0.0777277 | LTF          | 3.101985483 |
| 2701 | 92.841637 | 29.961086 | TGOLN2       | 3.098740751 |
| 2702 | 0.0309566 | 0.01      | PI15         | 3.0956551   |
| 2703 | 39.874759 | 12.89802  | EFEMP1       | 3.091541111 |
| 2704 | 6187.1304 | 2002.0977 | TMSB10       | 3.090323905 |
| 2705 | 89.145023 | 28.865212 | UQCRQ        | 3.088320371 |
| 2706 | 4.6910853 | 1.5207333 | ARMCX4       | 3.084752253 |
| 2707 | 30.985964 | 10.049983 | PGS1         | 3.083185594 |

|      |           |           |          |             |
|------|-----------|-----------|----------|-------------|
| 2708 | 39.052534 | 12.670304 | TNKS1BP1 | 3.082209642 |
| 2709 | 260.00632 | 84.455118 | BASP1    | 3.078633043 |
| 2710 | 25.12048  | 8.1629793 | SURF1    | 3.077366573 |
| 2711 | 124.51373 | 40.466086 | CALU     | 3.076989651 |
| 2712 | 12.668986 | 4.1184745 | ARHGEF17 | 3.076135627 |
| 2713 | 3.5874145 | 1.1682907 | PIK3R3   | 3.070652319 |
| 2714 | 19.343422 | 6.312805  | ASAH1    | 3.064156413 |
| 2715 | 7.8970283 | 2.5788602 | TRNAU1AP | 3.062216461 |
| 2716 | 44.818776 | 14.649787 | LIPA     | 3.059346528 |
| 2717 | 26.211452 | 8.5689076 | ACTR1B   | 3.058902373 |
| 2718 | 3.3797087 | 1.1048763 | ATP9B    | 3.058902373 |
| 2719 | 168.17012 | 55.017411 | FLOT1    | 3.056670976 |
| 2720 | 27.360091 | 8.9518312 | TMEM127  | 3.056368071 |
| 2721 | 3.585119  | 1.1743909 | L3MBTL4  | 3.052747641 |
| 2722 | 3.9260921 | 1.2860847 | CHFR     | 3.05274764  |
| 2723 | 14.05419  | 4.6091615 | TNS1     | 3.049185753 |
| 2724 | 17.092567 | 5.6078512 | ERBB2    | 3.047970833 |
| 2725 | 386.22139 | 126.7617  | PEA15    | 3.046830235 |
| 2726 | 14.759939 | 4.8455298 | RGS3     | 3.046093875 |
| 2727 | 18.912503 | 6.2135897 | FBXW4    | 3.043732257 |
| 2728 | 67.912936 | 22.322658 | RHBDD2   | 3.042331938 |
| 2729 | 3.5315963 | 1.1612653 | TLCD2    | 3.041162262 |
| 2730 | 16.779348 | 5.5174129 | AAED1    | 3.04116226  |
| 2731 | 6.1679953 | 2.0307088 | YPEL3    | 3.037360808 |
| 2732 | 90.482924 | 29.789982 | PPP1R7   | 3.037360807 |
| 2733 | 7.2339561 | 2.3816585 | LCAT     | 3.037360807 |
| 2734 | 44.47212  | 14.664528 | UXS1     | 3.032632172 |
| 2735 | 115.52206 | 38.130674 | TGFB1I1  | 3.029635989 |
| 2736 | 33.188278 | 10.957296 | SIPA1    | 3.028874736 |
| 2737 | 35.236091 | 11.635381 | ARHGEF10 | 3.028357367 |
| 2738 | 42.529625 | 14.045877 | ZNF395   | 3.027908239 |
| 2739 | 33.985149 | 11.231555 | BSDC1    | 3.025863163 |
| 2740 | 8.1061352 | 2.6793658 | RNFT1    | 3.025393271 |
| 2741 | 90.603176 | 29.955034 | TMEM59   | 3.02463941  |
| 2742 | 11.108839 | 3.6747067 | CLN8     | 3.023054577 |
| 2743 | 1.7245603 | 0.5705841 | RAB43    | 3.022447416 |
| 2744 | 5.7396118 | 1.9022774 | MID1     | 3.017231804 |
| 2745 | 27.728469 | 9.1919311 | TBC1D17  | 3.016609757 |
| 2746 | 51.493485 | 17.07446  | CALD1    | 3.015819242 |
| 2747 | 8.4518917 | 2.8025193 | CRYZL1   | 3.015819241 |
| 2748 | 2.8998477 | 0.9627415 | MITF     | 3.012072881 |
| 2749 | 90.456966 | 30.047053 | COL6A1   | 3.010510419 |
| 2750 | 3.2231919 | 1.0715449 | SNAP25   | 3.007985944 |



|      |           |           |          |             |
|------|-----------|-----------|----------|-------------|
| 2751 | 42.701231 | 14.202349 | FAT1     | 3.006631484 |
| 2752 | 0.0300461 | 0.01      | LY75     | 3.0046064   |
| 2753 | 29.60451  | 9.8711299 | PPP6R2   | 2.999100414 |
| 2754 | 50.341904 | 16.795654 | SLC35F6  | 2.997317283 |
| 2755 | 8.690963  | 2.9003949 | NEXN     | 2.996475794 |
| 2756 | 1.7674591 | 0.5905026 | IGDCC4   | 2.993143909 |
| 2757 | 71.418996 | 23.888163 | POMGNT1  | 2.989723174 |
| 2758 | 6.885856  | 2.3038154 | BVES     | 2.988892284 |
| 2759 | 1.3590135 | 0.4549613 | MICU3    | 2.987097155 |
| 2760 | 30.554814 | 10.228932 | DPM3     | 2.987097155 |
| 2761 | 1.4561642 | 0.4874847 | IFITM10  | 2.987097152 |
| 2762 | 34.521677 | 11.560866 | COL18A1  | 2.986080442 |
| 2763 | 45.173302 | 15.145214 | GPR108   | 2.98267837  |
| 2764 | 16.20885  | 5.4385927 | FAM174A  | 2.980339014 |
| 2765 | 39.922902 | 13.405056 | ARL6IP5  | 2.978197351 |
| 2766 | 6.8048816 | 2.285123  | ORAI3    | 2.977906085 |
| 2767 | 22.095929 | 7.4230792 | SNX7     | 2.976652758 |
| 2768 | 5.8317745 | 1.9617532 | ARHGAP26 | 2.97273611  |
| 2769 | 83.225781 | 27.996357 | FDPS     | 2.97273611  |
| 2770 | 0.6966844 | 0.234358  | MAGI2    | 2.972736109 |
| 2771 | 3.1338271 | 1.0541895 | AHSA2    | 2.972736109 |
| 2772 | 32.425206 | 10.943035 | RAB32    | 2.963090632 |
| 2773 | 18.218843 | 6.1503261 | TOM1     | 2.962256428 |
| 2774 | 19.119925 | 6.460819  | CASP7    | 2.959365483 |
| 2775 | 16.42322  | 5.5514327 | PMVK     | 2.958375065 |
| 2776 | 63.04169  | 21.326953 | MAFF     | 2.955963287 |
| 2777 | 29.919843 | 10.124064 | RND3     | 2.955319525 |
| 2778 | 2.4648078 | 0.8343199 | AGER     | 2.954271909 |
| 2779 | 44.30924  | 15.001726 | GTPBP2   | 2.953609516 |
| 2780 | 51.124371 | 17.32834  | LMF2     | 2.95033288  |
| 2781 | 243.92905 | 82.753076 | PPP1R15A | 2.947673536 |
| 2782 | 5.5150769 | 1.8724884 | VWA5A    | 2.945319571 |
| 2783 | 24.469169 | 8.3224425 | RNASEH2C | 2.940142783 |
| 2784 | 115.54414 | 39.300138 | COL4A1   | 2.940044211 |
| 2785 | 38.626973 | 13.142468 | FAM213A  | 2.939095854 |
| 2786 | 1.9595286 | 0.6667959 | HCFC2    | 2.938723111 |
| 2787 | 4.7761022 | 1.6264352 | SLC37A1  | 2.936546279 |
| 2788 | 74.146867 | 25.25304  | NDUFA2   | 2.936156092 |
| 2789 | 1.9759892 | 0.6732015 | DSEL     | 2.935212092 |
| 2790 | 0.029352  | 0.01      | RP1      | 2.9352042   |
| 2791 | 26.613789 | 9.0819475 | PIP5K1C  | 2.930405521 |
| 2792 | 1.087413  | 0.3711747 | KLRD1    | 2.92965298  |
| 2793 | 5.1181617 | 1.7470198 | ADPRH    | 2.929652978 |

|      |           |           |            |             |
|------|-----------|-----------|------------|-------------|
| 2794 | 2.3697602 | 0.8088877 | LYRM9      | 2.929652977 |
| 2795 | 1.156641  | 0.3948048 | SCNN1D     | 2.929652974 |
| 2796 | 21.156203 | 7.2245042 | TNFAIP1    | 2.928395076 |
| 2797 | 26.851006 | 9.1790962 | SIN3B      | 2.925234195 |
| 2798 | 184.04992 | 62.922255 | LASP1      | 2.925036927 |
| 2799 | 30.956348 | 10.586017 | C17orf62   | 2.924267586 |
| 2800 | 3.2520078 | 1.113886  | GLRB       | 2.919515771 |
| 2801 | 44.163198 | 15.146791 | FAM89B     | 2.91568007  |
| 2802 | 6.4636163 | 2.2181354 | KLHDC8B    | 2.913986385 |
| 2803 | 43.131276 | 14.829607 | MAFG       | 2.908456998 |
| 2804 | 68.708684 | 23.636066 | USP11      | 2.906942489 |
| 2805 | 12.188031 | 4.1944486 | ADCY6      | 2.905752845 |
| 2806 | 34.041353 | 11.7235   | GNPTG      | 2.903685063 |
| 2807 | 25.896763 | 8.9278349 | HSPA1B     | 2.900676711 |
| 2808 | 1.1941443 | 0.4124585 | FAXC       | 2.895186474 |
| 2809 | 1.7012204 | 0.5876031 | GEMIN8P4   | 2.895186472 |
| 2810 | 2.0360035 | 0.7032374 | TMEM44-AS1 | 2.895186472 |
| 2811 | 6.9703587 | 2.4075681 | TCTN2      | 2.895186472 |
| 2812 | 4.4866325 | 1.5496869 | KSR1       | 2.895186472 |
| 2813 | 4.3886778 | 1.5158532 | PPAP2B     | 2.895186472 |
| 2814 | 1.0360771 | 0.3578619 | CD34       | 2.895186469 |
| 2815 | 6.0306782 | 2.0848867 | GON4L      | 2.892568762 |
| 2816 | 10.391278 | 3.5933302 | NACC2      | 2.891823884 |
| 2817 | 37.442688 | 12.949644 | ZBTB4      | 2.891406855 |
| 2818 | 6.8606299 | 2.3740157 | MANBA      | 2.889883932 |
| 2819 | 19.115665 | 6.6204127 | PYGO2      | 2.887382735 |
| 2820 | 9.3053263 | 3.2243806 | SLC1A3     | 2.885926813 |
| 2821 | 38.353206 | 13.294713 | CRYBB2P1   | 2.884846521 |
| 2822 | 26.487227 | 9.1832352 | DECR1      | 2.884302312 |
| 2823 | 12.951808 | 4.4918255 | AP5Z1      | 2.883417422 |
| 2824 | 30.831914 | 10.696469 | PIM1       | 2.882438585 |
| 2825 | 4.4470328 | 1.5430443 | CDK19      | 2.881986534 |
| 2826 | 23.534771 | 8.1661628 | IGSF8      | 2.881986533 |
| 2827 | 14.008665 | 4.8613755 | FBXO25     | 2.881625879 |
| 2828 | 20.809645 | 7.2295398 | NECAB3     | 2.878418982 |
| 2829 | 116.8974  | 40.615379 | ATP6AP1    | 2.878155964 |
| 2830 | 91.569477 | 31.823344 | FAM127A    | 2.877430999 |
| 2831 | 12.52942  | 4.354721  | VRK3       | 2.877203948 |
| 2832 | 6.252962  | 2.1732773 | FUCA1      | 2.877203947 |
| 2833 | 81.84152  | 28.462096 | C11orf84   | 2.875456529 |
| 2834 | 0.0286854 | 0.01      | FAM186A    | 2.868541    |
| 2835 | 3.5517949 | 1.2382052 | TMEM242    | 2.868502725 |
| 2836 | 4.3372124 | 1.5128122 | EBF4       | 2.866986603 |

|      |           |           |              |             |
|------|-----------|-----------|--------------|-------------|
| 2837 | 10.324184 | 3.602745  | OSGIN1       | 2.865643751 |
| 2838 | 30.534725 | 10.663907 | RCAN1        | 2.863371235 |
| 2839 | 22.866587 | 7.9879514 | SCP2         | 2.862634772 |
| 2840 | 12.333686 | 4.3095378 | SLC35A2      | 2.861950913 |
| 2841 | 121.23453 | 42.36356  | CKS1B        | 2.861764407 |
| 2842 | 2.8489751 | 0.9966008 | RCAN2        | 2.858692524 |
| 2843 | 4.4569215 | 1.5606581 | LOC100133091 | 2.855796179 |
| 2844 | 2.4171399 | 0.846982  | ATP8B1       | 2.853826665 |
| 2845 | 135.31543 | 47.430838 | CTSZ         | 2.852899834 |
| 2846 | 93.558522 | 32.810115 | TMEM14B      | 2.851514626 |
| 2847 | 32.224901 | 11.301748 | TEX30        | 2.85132001  |
| 2848 | 0.0284466 | 0.01      | ABCA4        | 2.844656    |
| 2849 | 0.9660322 | 0.3397351 | MAFA         | 2.843486716 |
| 2850 | 1.9394201 | 0.682057  | CD27-AS1     | 2.843486714 |
| 2851 | 1.0973645 | 0.3859222 | IL7          | 2.843486714 |
| 2852 | 4.0645293 | 1.4294174 | HIST1H2AE    | 2.843486713 |
| 2853 | 2.160598  | 0.7598411 | BRICD5       | 2.843486712 |
| 2854 | 1.3351162 | 0.4695349 | ZNF575       | 2.843486712 |
| 2855 | 0.9713536 | 0.3416065 | CBLN3        | 2.843486711 |
| 2856 | 1.2154796 | 0.427461  | PLEKHA8P1    | 2.843486709 |
| 2857 | 0.5021675 | 0.1766027 | ZNF347       | 2.843486709 |
| 2858 | 55.121423 | 19.391295 | PPP1R12C     | 2.842586021 |
| 2859 | 21.577946 | 7.6083135 | CLIP2        | 2.836101034 |
| 2860 | 20.491973 | 7.2292982 | HMGCL        | 2.834572963 |
| 2861 | 25.234378 | 8.9081921 | TCTA         | 2.83271593  |
| 2862 | 13.329298 | 4.7091848 | DOCK9        | 2.830489568 |
| 2863 | 16.123153 | 5.6974656 | PCYOX1       | 2.829881514 |
| 2864 | 2.709871  | 0.9575917 | SLC38A4      | 2.829881513 |
| 2865 | 6.0506834 | 2.1381402 | SLC31A2      | 2.829881513 |
| 2866 | 30.929301 | 10.933507 | PXMP2        | 2.828854706 |
| 2867 | 22.885997 | 8.0967222 | HDAC5        | 2.826575578 |
| 2868 | 4.6809125 | 1.6577805 | TMPO-AS1     | 2.823602192 |
| 2869 | 92.393142 | 32.725736 | WSB2         | 2.823256373 |
| 2870 | 4.16799   | 1.4780175 | MIR155HG     | 2.819986822 |
| 2871 | 24.530827 | 8.7061705 | NTPCR        | 2.817636833 |
| 2872 | 9.5200343 | 3.3807098 | HSPA2        | 2.815986841 |
| 2873 | 6.1128792 | 2.1725722 | SLC7A11      | 2.81365993  |
| 2874 | 2.1589223 | 0.7676259 | SORBS2       | 2.812466858 |
| 2875 | 24.974529 | 8.885877  | ANKRD10      | 2.810586867 |
| 2876 | 1.2990782 | 0.4628724 | ZNF132       | 2.806558317 |
| 2877 | 0.9127687 | 0.325227  | ANGPT1       | 2.806558315 |
| 2878 | 4.999483  | 1.7813572 | U2AF1L4      | 2.806558315 |
| 2879 | 90.586037 | 32.322534 | GNA11        | 2.802566055 |

|      |           |           |            |             |
|------|-----------|-----------|------------|-------------|
| 2880 | 71.729253 | 25.603798 | PRDX4      | 2.801508277 |
| 2881 | 78.934369 | 28.189949 | HPCAL1     | 2.800089105 |
| 2882 | 2.4361822 | 0.8707277 | PTPRH      | 2.79786928  |
| 2883 | 2.967     | 1.0604498 | TXNDC5     | 2.79786928  |
| 2884 | 30.128613 | 10.768414 | CD97       | 2.797869279 |
| 2885 | 9.3452691 | 3.3440674 | DYNLT3     | 2.794581537 |
| 2886 | 42.671305 | 15.271772 | DDA1       | 2.794129338 |
| 2887 | 126.89081 | 45.430078 | ARPC5      | 2.793101355 |
| 2888 | 3.2079741 | 1.1490755 | LMCD1      | 2.791786956 |
| 2889 | 2.495249  | 0.893782  | NIPAL2     | 2.791786955 |
| 2890 | 14.872563 | 5.3272559 | KDM4B      | 2.791786955 |
| 2891 | 6.7386665 | 2.4137467 | PHLDB3     | 2.791786954 |
| 2892 | 2.0446172 | 0.7323686 | GALNT12    | 2.791786953 |
| 2893 | 79.166395 | 28.388752 | CDK16      | 2.788653636 |
| 2894 | 17.597155 | 6.3169495 | PDK2       | 2.785704631 |
| 2895 | 24.172877 | 8.6782465 | GINM1      | 2.785456373 |
| 2896 | 15.50262  | 5.5688034 | RBP4       | 2.783833147 |
| 2897 | 87.310391 | 31.387055 | ASPH       | 2.7817325   |
| 2898 | 1.4885679 | 0.5357465 | IL12RB1    | 2.77849273  |
| 2899 | 17.21243  | 6.200832  | POFUT2     | 2.775825956 |
| 2900 | 7.2007957 | 2.5944506 | NMRK1      | 2.775460715 |
| 2901 | 6.3425935 | 2.2881036 | SFXN5      | 2.771987047 |
| 2902 | 17.924517 | 6.4745941 | ITGB1BP1   | 2.768438677 |
| 2903 | 100.51618 | 36.307893 | SERPINB6   | 2.768438677 |
| 2904 | 35.215924 | 12.734448 | SYNPO      | 2.765406434 |
| 2905 | 155.24862 | 56.146855 | CNN3       | 2.7650457   |
| 2906 | 7.4105633 | 2.6803125 | HCN2       | 2.764813168 |
| 2907 | 11.173992 | 4.0415    | P4HTM      | 2.764813167 |
| 2908 | 56.053253 | 20.27768  | PVR        | 2.76428338  |
| 2909 | 0.0920086 | 0.0332972 | PAX7       | 2.763255048 |
| 2910 | 10.141728 | 3.6718225 | JDP2       | 2.762041888 |
| 2911 | 0.2388875 | 0.0866376 | TMEM51-AS1 | 2.757320465 |
| 2912 | 0.7082396 | 0.2568579 | REC8       | 2.757320451 |
| 2913 | 14.410604 | 5.2263072 | DNAL4      | 2.75732045  |
| 2914 | 2.4809464 | 0.8997672 | STARD5     | 2.757320449 |
| 2915 | 4.0076827 | 1.4534701 | C3orf14    | 2.757320449 |
| 2916 | 2.69337   | 0.976807  | ACYP2      | 2.757320449 |
| 2917 | 0.9246789 | 0.3353542 | LPAR2      | 2.757320448 |
| 2918 | 2.3851159 | 0.8650122 | RPS10P7    | 2.757320448 |
| 2919 | 1.6781037 | 0.6085994 | POLR2J2    | 2.757320448 |
| 2920 | 0.6040565 | 0.2190737 | ZNF816     | 2.757320447 |
| 2921 | 0.660799  | 0.2396526 | ACAP1      | 2.757320443 |
| 2922 | 0.5101579 | 0.1850194 | PTCHD4     | 2.757320441 |

|      |           |           |               |             |
|------|-----------|-----------|---------------|-------------|
| 2923 | 99.785927 | 36.202965 | NAPA          | 2.756291598 |
| 2924 | 288.58528 | 104.91393 | CSRP1         | 2.750685895 |
| 2925 | 11.301266 | 4.111175  | DCBLD1        | 2.748913985 |
| 2926 | 17.145746 | 6.2483037 | CASKIN2       | 2.744064101 |
| 2927 | 30.183043 | 11.00152  | LPPR2         | 2.743533847 |
| 2928 | 148.85679 | 54.262882 | EIF3K         | 2.743252487 |
| 2929 | 17.396986 | 6.3424148 | STAT2         | 2.742959406 |
| 2930 | 42.979582 | 15.680783 | MAN2B1        | 2.740907827 |
| 2931 | 381.40389 | 139.26338 | UBE2S         | 2.738723414 |
| 2932 | 11.149433 | 4.072253  | PEX6          | 2.737902699 |
| 2933 | 4.7628123 | 1.7401287 | ADCK5         | 2.737046033 |
| 2934 | 1.1180231 | 0.408478  | DENND1B       | 2.737046032 |
| 2935 | 177.68132 | 64.934525 | UBA1          | 2.736315111 |
| 2936 | 16.074423 | 5.8777922 | CCNDBP1       | 2.734772268 |
| 2937 | 50.325576 | 18.407621 | VIMP          | 2.733953326 |
| 2938 | 15.576782 | 5.7073147 | RAB23         | 2.729266317 |
| 2939 | 118.00283 | 43.276075 | GUK1          | 2.726745324 |
| 2940 | 93.455494 | 34.309232 | SCYL1         | 2.723916788 |
| 2941 | 62.829955 | 23.079989 | LRRC8A        | 2.722269765 |
| 2942 | 8.5425915 | 3.1381775 | DNASE1L1      | 2.722150546 |
| 2943 | 103.63447 | 38.268579 | NRBP1         | 2.708082586 |
| 2944 | 35.403776 | 13.073374 | PMM1          | 2.708082584 |
| 2945 | 0.0270719 | 0.01      | BZRAP1        | 2.7071902   |
| 2946 | 54.605168 | 20.174564 | TMEM219       | 2.706634412 |
| 2947 | 0.2756607 | 0.1018948 | MEF2BNB-MEF2B | 2.705347152 |
| 2948 | 114.73574 | 42.452819 | NPLOC4        | 2.702664827 |
| 2949 | 22.467251 | 8.325906  | LENG8         | 2.698475196 |
| 2950 | 153.94335 | 57.054583 | MDK           | 2.698176742 |
| 2951 | 29.227726 | 10.836455 | CUEDC1        | 2.697166641 |
| 2952 | 14.398511 | 5.3397092 | WDR45         | 2.696497204 |
| 2953 | 54.097805 | 20.065604 | TPGS2         | 2.696046662 |
| 2954 | 22.008177 | 8.1668559 | TMEM104       | 2.694816423 |
| 2955 | 18.818684 | 6.9935081 | MPC2          | 2.690878992 |
| 2956 | 49.839343 | 18.530742 | CITED2        | 2.68954923  |
| 2957 | 3.7775546 | 1.4051377 | AGPAT4        | 2.688387438 |
| 2958 | 0.7416352 | 0.2758662 | LOC646471     | 2.688387438 |
| 2959 | 1.6213007 | 0.6030755 | CROT          | 2.688387437 |
| 2960 | 33.746728 | 12.564215 | VPS37C        | 2.685940113 |
| 2961 | 28.511097 | 10.633813 | STX4          | 2.681173519 |
| 2962 | 5.9658933 | 2.2292215 | GNB1L         | 2.67622279  |
| 2963 | 3.7078763 | 1.3854886 | CCDC126       | 2.676222789 |
| 2964 | 7.8372462 | 2.928473  | FUNDC1        | 2.676222789 |
| 2965 | 369.83336 | 138.38099 | CD63          | 2.672573395 |

|      |           |           |           |             |
|------|-----------|-----------|-----------|-------------|
| 2966 | 5.8730768 | 2.1987038 | FRS3      | 2.671154185 |
| 2967 | 6.1970115 | 2.3199752 | ABHD3     | 2.671154185 |
| 2968 | 47.609192 | 17.833372 | ATF6B     | 2.66966856  |
| 2969 | 63.999847 | 23.984581 | FAM64A    | 2.668374628 |
| 2970 | 18.060823 | 6.7701662 | NTN1      | 2.667707535 |
| 2971 | 11.179961 | 4.1913205 | GNAI1     | 2.667407826 |
| 2972 | 4.8301702 | 1.8109261 | TNRC6C    | 2.667237537 |
| 2973 | 6.7225645 | 2.5210066 | NUDT18    | 2.666619119 |
| 2974 | 5.0063702 | 1.8788971 | ELMOD3    | 2.664526011 |
| 2975 | 34.79212  | 13.066449 | RRAS2     | 2.662706513 |
| 2976 | 38.9342   | 14.643277 | LTBP3     | 2.658844719 |
| 2977 | 1.4980795 | 0.5634325 | DNAJC27   | 2.658844719 |
| 2978 | 3.7177314 | 1.3982507 | NUDT10    | 2.658844719 |
| 2979 | 3.1351367 | 1.1791349 | LHX8      | 2.658844718 |
| 2980 | 130.55202 | 49.176587 | HN1L      | 2.65475972  |
| 2981 | 2.8876399 | 1.0886802 | RNASL     | 2.65242239  |
| 2982 | 25.415556 | 9.5826769 | UBE2H     | 2.65223964  |
| 2983 | 95.321138 | 35.959553 | STK24     | 2.650787614 |
| 2984 | 0.0264887 | 0.01      | LRP2      | 2.6488656   |
| 2985 | 7.2723926 | 2.7473807 | TAPBPL    | 2.647027632 |
| 2986 | 2.4526605 | 0.9265716 | MAOA      | 2.64702763  |
| 2987 | 10.410291 | 3.9335546 | IL17RA    | 2.646535253 |
| 2988 | 47.869543 | 18.087627 | STX5      | 2.646535253 |
| 2989 | 1.4960014 | 0.5661456 | RCBTB2    | 2.642432098 |
| 2990 | 3.6039011 | 1.3638576 | HEXIM2    | 2.642432098 |
| 2991 | 18.271532 | 6.9173988 | L3MBTL2   | 2.641387658 |
| 2992 | 7.4861956 | 2.8373241 | C10orf10  | 2.63847043  |
| 2993 | 10.906339 | 4.1335839 | SDSL      | 2.638470429 |
| 2994 | 6.8792068 | 2.6090336 | TIFA      | 2.63668768  |
| 2995 | 4.338112  | 1.6452885 | C10orf32  | 2.63668768  |
| 2996 | 4.671813  | 1.7718492 | LINC00673 | 2.636687679 |
| 2997 | 17.084241 | 6.4861265 | ZNF672    | 2.63396664  |
| 2998 | 3.1816718 | 1.2088475 | LOC284385 | 2.631987701 |
| 2999 | 2.0582667 | 0.7820199 | INADL     | 2.631987699 |
| 3000 | 14.364817 | 5.4615702 | ACAP3     | 2.630162467 |
| 3001 | 4.9064329 | 1.8692904 | APH1B     | 2.624756966 |
| 3002 | 33.298733 | 12.694289 | PAPSS2    | 2.623127088 |
| 3003 | 86.629287 | 33.048694 | TNC       | 2.621262026 |
| 3004 | 2.0905969 | 0.7981039 | ZNF175    | 2.619454429 |
| 3005 | 28.046037 | 10.706824 | TULP3     | 2.619454427 |
| 3006 | 5.0408536 | 1.9243906 | RARB      | 2.619454426 |
| 3007 | 2.1750017 | 0.8303262 | HHAT      | 2.619454426 |
| 3008 | 33.037807 | 12.636229 | ANKRD13D  | 2.61453064  |

|      |           |           |              |             |
|------|-----------|-----------|--------------|-------------|
| 3009 | 0.0261447 | 0.01      | USP6         | 2.6144712   |
| 3010 | 8.2500311 | 3.1555989 | RAB11FIP1    | 2.614410548 |
| 3011 | 25.632024 | 9.8079434 | DDB2         | 2.613394382 |
| 3012 | 161.87808 | 62.033099 | CLPTM1       | 2.609543648 |
| 3013 | 1.8954322 | 0.726925  | STS          | 2.607466078 |
| 3014 | 5.0237619 | 1.9266835 | CDK20        | 2.607466077 |
| 3015 | 19.270652 | 7.3919226 | SLC2A6       | 2.606987818 |
| 3016 | 2.7426715 | 1.0525791 | C17orf103    | 2.605667823 |
| 3017 | 139.01331 | 53.357754 | RELA         | 2.605306603 |
| 3018 | 40.106349 | 15.403749 | 8-Sep        | 2.60367458  |
| 3019 | 10.865749 | 4.1764594 | TRADD        | 2.601665262 |
| 3020 | 7.4722576 | 2.8735647 | PGPEP1       | 2.600344285 |
| 3021 | 84.461471 | 32.481463 | BIRC5        | 2.600297644 |
| 3022 | 5.5371848 | 2.1298837 | EXTL2        | 2.59975928  |
| 3023 | 50.568812 | 19.460959 | EBP          | 2.598474815 |
| 3024 | 33.742103 | 13.003087 | NUCB2        | 2.594930183 |
| 3025 | 64.440919 | 24.834834 | ESYT1        | 2.594779542 |
| 3026 | 233.34217 | 89.952563 | ATP6V0E1     | 2.594058055 |
| 3027 | 26.930003 | 10.3838   | ZDHHC12      | 2.593463291 |
| 3028 | 13.558899 | 5.230087  | MIR22HG      | 2.59248064  |
| 3029 | 27.536659 | 10.627523 | RAB24        | 2.591070245 |
| 3030 | 0.1463685 | 0.0566225 | KIAA1875     | 2.58498794  |
| 3031 | 0.1854418 | 0.071738  | LOC100506023 | 2.584987935 |
| 3032 | 0.3195331 | 0.1236111 | SCIN         | 2.584987932 |
| 3033 | 0.3295375 | 0.1274812 | LOC100335030 | 2.58498793  |
| 3034 | 0.2936031 | 0.1135801 | TRPC4        | 2.584987929 |
| 3035 | 0.24964   | 0.096573  | SLC9A4       | 2.584987928 |
| 3036 | 0.3320578 | 0.1284562 | SEMA3D       | 2.584987928 |
| 3037 | 0.9933246 | 0.3842666 | IL23A        | 2.584987925 |
| 3038 | 0.256019  | 0.0990407 | MSH5-SAPCD1  | 2.584987925 |
| 3039 | 0.7814005 | 0.302284  | SPDYE5       | 2.584987925 |
| 3040 | 0.1636817 | 0.0633201 | COL22A1      | 2.584987924 |
| 3041 | 0.2945992 | 0.1139654 | SPIB         | 2.584987924 |
| 3042 | 0.2387165 | 0.0923472 | LOC100506085 | 2.584987924 |
| 3043 | 0.4357999 | 0.1685887 | CHP2         | 2.584987923 |
| 3044 | 0.4092685 | 0.1583251 | TMEM151A     | 2.584987923 |
| 3045 | 0.6239506 | 0.2413747 | LOC283693    | 2.584987923 |
| 3046 | 2.3589853 | 0.9125711 | TMEM220      | 2.584987922 |
| 3047 | 0.7816935 | 0.3023974 | LINC00629    | 2.584987922 |
| 3048 | 2.216492  | 0.8574477 | EFCAB2       | 2.584987922 |
| 3049 | 8.1918043 | 3.1689913 | SPSB2        | 2.584987922 |
| 3050 | 28.844221 | 11.158358 | NUDT14       | 2.584987921 |
| 3051 | 6.0682051 | 2.3474791 | CCDC84       | 2.584987921 |

|      |           |           |                 |             |
|------|-----------|-----------|-----------------|-------------|
| 3052 | 5.4650219 | 2.1141383 | C6orf226        | 2.584987921 |
| 3053 | 3.9732984 | 1.5370665 | B9D2            | 2.584987921 |
| 3054 | 1.2660966 | 0.4897882 | GSDMB           | 2.584987921 |
| 3055 | 0.2212309 | 0.085583  | KIAA1751        | 2.584987921 |
| 3056 | 17.081926 | 6.6081261 | ST3GAL3         | 2.584987921 |
| 3057 | 0.5186648 | 0.2006449 | FAM227B         | 2.58498792  |
| 3058 | 0.6250735 | 0.2418091 | POPDC2          | 2.584987919 |
| 3059 | 1.5763956 | 0.6098271 | MYL5            | 2.584987919 |
| 3060 | 0.5489976 | 0.2123792 | CCT6B           | 2.584987919 |
| 3061 | 0.6786047 | 0.2625175 | LOC100131094    | 2.584987919 |
| 3062 | 0.7093244 | 0.2744014 | GUSBP3          | 2.584987918 |
| 3063 | 1.0820327 | 0.4185833 | TCAP            | 2.584987918 |
| 3064 | 0.2971193 | 0.1149403 | MEFV            | 2.584987915 |
| 3065 | 0.3237022 | 0.1252239 | LIMS3-LOC440895 | 2.584987914 |
| 3066 | 0.3250148 | 0.1257317 | SPDYE3          | 2.584987911 |
| 3067 | 17.257075 | 6.6805055 | PARVA           | 2.583199002 |
| 3068 | 126.57393 | 49.069124 | PKN1            | 2.579502537 |
| 3069 | 15.806822 | 6.1291071 | PLEKHA2         | 2.578976321 |
| 3070 | 38.01455  | 14.75487  | PCNXL3          | 2.576407049 |
| 3071 | 46.403483 | 18.011515 | ZNF358          | 2.576323157 |
| 3072 | 136.18512 | 52.9382   | ITM2B           | 2.572530148 |
| 3073 | 5.9635316 | 2.3195242 | SNCA            | 2.571015014 |
| 3074 | 17.868363 | 6.9499258 | ARMC7           | 2.571015013 |
| 3075 | 108.34348 | 42.160187 | KLC2            | 2.569805612 |
| 3076 | 140.50026 | 54.700112 | PEBP1           | 2.568555234 |
| 3077 | 2.8684313 | 1.1173557 | ZIC1            | 2.567160418 |
| 3078 | 25.058417 | 9.7635635 | PHF1            | 2.566523722 |
| 3079 | 26.147503 | 10.190621 | CCS             | 2.565839861 |
| 3080 | 9.1007229 | 3.5478971 | C1QTNF6         | 2.565103399 |
| 3081 | 416.399   | 162.47619 | COX8A           | 2.562830881 |
| 3082 | 5.4414895 | 2.1235    | ALDH6A1         | 2.562509765 |
| 3083 | 4.7936931 | 1.8707024 | RAD51D          | 2.562509765 |
| 3084 | 93.542957 | 36.517823 | HMG20B          | 2.561569912 |
| 3085 | 5.5888468 | 2.1828287 | DHRS13          | 2.560368988 |
| 3086 | 57.89474  | 22.625909 | UBXN6           | 2.55878067  |
| 3087 | 43.576578 | 17.054632 | FLOT2           | 2.55511695  |
| 3088 | 29.515622 | 11.570105 | SLC12A4         | 2.551024577 |
| 3089 | 1.8954723 | 0.7431705 | TMEM229B        | 2.550521415 |
| 3090 | 1.7982233 | 0.7050414 | LACC1           | 2.550521415 |
| 3091 | 16.385219 | 6.4376462 | WSB1            | 2.545218877 |
| 3092 | 335.55225 | 131.86185 | CTSB            | 2.544725808 |
| 3093 | 50.623933 | 19.898363 | NRP1            | 2.544125569 |
| 3094 | 51.854814 | 20.382308 | SPRY2           | 2.544109042 |



|      |           |           |            |             |
|------|-----------|-----------|------------|-------------|
| 3095 | 14.44353  | 5.6795661 | FAHD2A     | 2.543069199 |
| 3096 | 175.61844 | 69.108636 | TFDP1      | 2.541193846 |
| 3097 | 58.22478  | 22.925994 | KIFC3      | 2.53968401  |
| 3098 | 6.8224147 | 2.6881192 | CLCN2      | 2.537988141 |
| 3099 | 3.1575682 | 1.2441225 | IL11RA     | 2.537988141 |
| 3100 | 32.321219 | 12.752256 | TUSC3      | 2.534549133 |
| 3101 | 23.565332 | 9.3144039 | JOSD2      | 2.529988178 |
| 3102 | 9.3653546 | 3.7017385 | TESK1      | 2.529988178 |
| 3103 | 27.754421 | 10.970178 | ACOT9      | 2.529988178 |
| 3104 | 4.4729649 | 1.7696884 | ST20       | 2.527543745 |
| 3105 | 2.8136171 | 1.1131823 | GEMIN8     | 2.527543745 |
| 3106 | 6.1872996 | 2.4479496 | HIST2H2BE  | 2.527543745 |
| 3107 | 0.8544146 | 0.3380415 | CLEC2D     | 2.527543743 |
| 3108 | 16.668061 | 6.5988537 | IFNGR1     | 2.525902483 |
| 3109 | 3.7851492 | 1.499145  | TLR4       | 2.524871922 |
| 3110 | 25.408973 | 10.06629  | MMD        | 2.524164676 |
| 3111 | 137.47247 | 54.558287 | COX7A2     | 2.519735798 |
| 3112 | 63.489928 | 25.23392  | LEPRE1     | 2.51605491  |
| 3113 | 12.406873 | 4.9387048 | DTX4       | 2.512171361 |
| 3114 | 0.6975372 | 0.2777781 | HNRNPU-AS1 | 2.511131126 |
| 3115 | 153.62212 | 61.176461 | SMS        | 2.511131124 |
| 3116 | 125.12857 | 49.849787 | PLIN3      | 2.510112408 |
| 3117 | 2.7953339 | 1.1145722 | ATP7A      | 2.507988282 |
| 3118 | 280.19986 | 111.794   | CKAP4      | 2.506394465 |
| 3119 | 62.358741 | 24.884148 | GNA12      | 2.505962507 |
| 3120 | 24.018623 | 9.5851804 | UNC93B1    | 2.505808111 |
| 3121 | 16.9179   | 6.7588888 | FNBP1      | 2.503059342 |
| 3122 | 34.274058 | 13.695874 | GAA        | 2.502509707 |
| 3123 | 4.5179831 | 1.8060365 | C20orf194  | 2.501601214 |
| 3124 | 19.544618 | 7.8157994 | FBXO31     | 2.500654982 |
| 3125 | 5.3864398 | 2.1555919 | DSTNP2     | 2.498821657 |
| 3126 | 0.024982  | 0.01      | SCN1A      | 2.4981959   |
| 3127 | 100.93888 | 40.424248 | ATP6V1E1   | 2.496988333 |
| 3128 | 216.02604 | 86.536927 | SLC3A2     | 2.496345124 |
| 3129 | 23.739569 | 9.5116152 | LMAN2L     | 2.495850406 |
| 3130 | 39.564909 | 15.869909 | LOC401397  | 2.49307724  |
| 3131 | 78.205356 | 31.370987 | IFI27L2    | 2.492919858 |
| 3132 | 250.73818 | 100.61853 | UBC        | 2.491968277 |
| 3133 | 14.574085 | 5.8489147 | DTNBP1     | 2.491758848 |
| 3134 | 29.011298 | 11.650165 | ALDH2      | 2.490205029 |
| 3135 | 31.940627 | 12.828841 | NFU1       | 2.489751524 |
| 3136 | 220.16794 | 88.443938 | EMP3       | 2.489350298 |
| 3137 | 37.145685 | 14.926347 | SCARB2     | 2.488598541 |

|      |           |           |            |             |
|------|-----------|-----------|------------|-------------|
| 3138 | 173.759   | 69.82866  | PSMA1      | 2.488362168 |
| 3139 | 7.3642779 | 2.9598582 | XKR8       | 2.488050874 |
| 3140 | 20.880627 | 8.3923632 | SLC1A4     | 2.488050874 |
| 3141 | 28.729672 | 11.565377 | LZTS2      | 2.484110344 |
| 3142 | 0.213033  | 0.0858454 | SPTBN5     | 2.481588409 |
| 3143 | 0.4021862 | 0.1620681 | C2orf16    | 2.481588409 |
| 3144 | 1.0182386 | 0.4103173 | RASAL2-AS1 | 2.481588406 |
| 3145 | 0.8979512 | 0.3618453 | MAB21L2    | 2.481588405 |
| 3146 | 2.4197329 | 0.9750742 | PPM1H      | 2.481588405 |
| 3147 | 1.6750127 | 0.674976  | SPIN3      | 2.481588405 |
| 3148 | 231.22562 | 93.176459 | CAPZB      | 2.481588405 |
| 3149 | 4.5468982 | 1.8322532 | TARSL2     | 2.481588404 |
| 3150 | 0.2049159 | 0.0825745 | TSHZ2      | 2.481588403 |
| 3151 | 0.6771714 | 0.2728782 | ACTC1      | 2.481588402 |
| 3152 | 28.220766 | 11.381265 | KIAA0195   | 2.479580647 |
| 3153 | 7.2665871 | 2.9313317 | MROH1      | 2.478937135 |
| 3154 | 37.114959 | 14.972126 | ARL2BP     | 2.478937134 |
| 3155 | 19.194691 | 7.7436804 | GLIPR2     | 2.478755542 |
| 3156 | 12.828506 | 5.1763206 | NADSYN1    | 2.47830588  |
| 3157 | 6.9820019 | 2.8206442 | LMBR1L     | 2.475321767 |
| 3158 | 0.0247329 | 0.01      | ADARB2     | 2.473291    |
| 3159 | 25.433892 | 10.298686 | PSMD9      | 2.469624823 |
| 3160 | 10.891693 | 4.4137272 | BAI2       | 2.467685947 |
| 3161 | 2.6585944 | 1.0782395 | SLC27A3    | 2.465680786 |
| 3162 | 24.24971  | 9.854429  | MICAL1     | 2.46079297  |
| 3163 | 4.2732736 | 1.7369651 | ABHD15     | 2.460195401 |
| 3164 | 102.79165 | 41.797085 | AP2B1      | 2.459301793 |
| 3165 | 0.0245899 | 0.01      | COL6A6     | 2.4589912   |
| 3166 | 17.074079 | 6.9446042 | TMEM216    | 2.458610734 |
| 3167 | 28.879952 | 11.748947 | FRMD8      | 2.458088513 |
| 3168 | 5.6204265 | 2.288691  | TPD52L1    | 2.455738525 |
| 3169 | 1.4616429 | 0.5951948 | CSAD       | 2.455738523 |
| 3170 | 0.585565  | 0.2384476 | NOTCH4     | 2.455738522 |
| 3171 | 18.286329 | 7.4581189 | OGFOD3     | 2.451868782 |
| 3172 | 23.287515 | 9.4990243 | UBE2B      | 2.45156919  |
| 3173 | 7.3181526 | 2.986856  | MFSD11     | 2.450118986 |
| 3174 | 20.400405 | 8.3303139 | PCNT       | 2.448935926 |
| 3175 | 14.461029 | 5.9050256 | ARL3       | 2.448935925 |
| 3176 | 11.575486 | 4.7302448 | RGL1       | 2.447121898 |
| 3177 | 67.335415 | 27.524595 | RBBP7      | 2.446372627 |
| 3178 | 23.617757 | 9.6564693 | AIFM2      | 2.445796263 |
| 3179 | 3.6401659 | 1.4894366 | FLJ33630   | 2.443988581 |
| 3180 | 1.5472264 | 0.6330743 | NUDT12     | 2.443988581 |

|      |           |           |              |             |
|------|-----------|-----------|--------------|-------------|
| 3181 | 7.4428393 | 3.0453658 | SUZ12P1      | 2.44398858  |
| 3182 | 35.996921 | 14.734032 | OTUD5        | 2.443114166 |
| 3183 | 47.413643 | 19.408311 | JUND         | 2.442955618 |
| 3184 | 13.8933   | 5.6893386 | UNC119       | 2.441988589 |
| 3185 | 98.850378 | 40.513595 | C12orf75     | 2.439931045 |
| 3186 | 27.761477 | 11.379334 | MTSS1L       | 2.439639846 |
| 3187 | 7.3592119 | 3.0194434 | UBXN11       | 2.437274326 |
| 3188 | 22.391063 | 9.1942595 | MCAM         | 2.435330725 |
| 3189 | 33.306706 | 13.676461 | PML          | 2.435330725 |
| 3190 | 83.882299 | 34.450581 | NID1         | 2.434858791 |
| 3191 | 48.97977  | 20.116828 | CBX4         | 2.434765981 |
| 3192 | 11.761524 | 4.8343046 | DTX2         | 2.432929808 |
| 3193 | 24.396878 | 10.03329  | RFNG         | 2.431593035 |
| 3194 | 8.0444252 | 3.3097002 | ARSJ         | 2.430560071 |
| 3195 | 64.284759 | 26.451035 | UFD1L        | 2.430330524 |
| 3196 | 121.81098 | 50.150403 | POLR2G       | 2.42891318  |
| 3197 | 7.3759536 | 3.0372896 | RBM20        | 2.428465717 |
| 3198 | 236.93342 | 97.57084  | CST3         | 2.428321987 |
| 3199 | 11.83341  | 4.8744485 | PDLIM3       | 2.427640829 |
| 3200 | 4.6985865 | 1.9395586 | RASSF5       | 2.422502966 |
| 3201 | 5.4256212 | 2.2424104 | ENGASE       | 2.419548694 |
| 3202 | 7.6094046 | 3.1454758 | INPP5E       | 2.419158508 |
| 3203 | 10.863643 | 4.4913169 | TPCN2        | 2.418810127 |
| 3204 | 26.060181 | 10.778807 | ABHD4        | 2.417723996 |
| 3205 | 54.450952 | 22.555896 | RBM3         | 2.414045172 |
| 3206 | 0.2079242 | 0.0861807 | AKAP2        | 2.412655407 |
| 3207 | 0.505824  | 0.2096545 | SPDYE8P      | 2.412655399 |
| 3208 | 0.7702199 | 0.3192416 | ROM1         | 2.412655396 |
| 3209 | 2.2408548 | 0.9287919 | LOC100506713 | 2.412655395 |
| 3210 | 1.0726445 | 0.4445908 | UPK3BL       | 2.412655394 |
| 3211 | 1.9633869 | 0.8137867 | EID3         | 2.412655394 |
| 3212 | 1.1423622 | 0.4734875 | SPIN2B       | 2.412655394 |
| 3213 | 3.4270865 | 1.4204625 | RP2          | 2.412655394 |
| 3214 | 17.13711  | 7.1030078 | ULBP2        | 2.412655394 |
| 3215 | 16.530272 | 6.8514849 | SCARNA9      | 2.412655393 |
| 3216 | 9.5855212 | 3.9730171 | HOXC13       | 2.412655393 |
| 3217 | 0.9279876 | 0.3846333 | BTBD19       | 2.412655393 |
| 3218 | 0.6810441 | 0.2822799 | BATF2        | 2.412655392 |
| 3219 | 2.3586039 | 0.9775967 | WBP1         | 2.412655392 |
| 3220 | 0.5727509 | 0.2373944 | TAPT1-AS1    | 2.412655392 |
| 3221 | 1.8630862 | 0.772214  | NAT1         | 2.412655392 |
| 3222 | 1.1665706 | 0.4835214 | GP1BA        | 2.412655392 |
| 3223 | 0.9250453 | 0.3834138 | LOC155060    | 2.412655391 |

|      |           |           |          |             |
|------|-----------|-----------|----------|-------------|
| 3224 | 0.4376827 | 0.1814112 | ZNF836   | 2.412655389 |
| 3225 | 0.5511131 | 0.228426  | OR7E156P | 2.412655387 |
| 3226 | 28.215887 | 11.700343 | RAB5B    | 2.411543569 |
| 3227 | 35.57575  | 14.758652 | UGP2     | 2.410501237 |
| 3228 | 34.606138 | 14.383103 | ATP6V1H  | 2.406027218 |
| 3229 | 12.841566 | 5.337464  | ADCY9    | 2.40593022  |
| 3230 | 81.119992 | 33.716883 | ABHD12   | 2.405916132 |
| 3231 | 23.1555   | 9.6267773 | PPP1R37  | 2.405322094 |
| 3232 | 4.105827  | 1.7070891 | LRRC16A  | 2.405162675 |
| 3233 | 6.8874035 | 2.8649303 | TMEM62   | 2.404038767 |
| 3234 | 5.3170119 | 2.211903  | AR       | 2.403817828 |
| 3235 | 238.14051 | 99.233038 | SOD1     | 2.399810733 |
| 3236 | 75.45384  | 31.449472 | CDC42EP4 | 2.399208502 |
| 3237 | 9.2982176 | 3.8775067 | PPP2R3B  | 2.397988795 |
| 3238 | 21.684026 | 9.0429114 | PLCB3    | 2.397903193 |
| 3239 | 28.4616   | 11.873898 | EPDR1    | 2.3969888   |
| 3240 | 5.5581001 | 2.3198938 | SLC27A1  | 2.395842464 |
| 3241 | 2.1147551 | 0.8831663 | ZNF160   | 2.394515129 |
| 3242 | 776.95392 | 324.60242 | GSTP1    | 2.393555566 |
| 3243 | 14.415932 | 6.023269  | HEXIM1   | 2.393373433 |
| 3244 | 30.910931 | 12.922206 | SH3BGRL  | 2.392078375 |
| 3245 | 29.7854   | 12.454136 | MTFR1L   | 2.391607145 |
| 3246 | 45.607679 | 19.0717   | ERCC2    | 2.391379773 |
| 3247 | 18.254691 | 7.6343882 | EDN1     | 2.391113828 |
| 3248 | 32.879297 | 13.758531 | MLXIP    | 2.389738834 |
| 3249 | 24.3924   | 10.211969 | TRAPPC12 | 2.388608994 |
| 3250 | 12.913275 | 5.4080612 | RHBDF2   | 2.387782657 |
| 3251 | 53.16741  | 22.268243 | STAT3    | 2.387588844 |
| 3252 | 4.1349107 | 1.7328849 | HSD17B6  | 2.386142697 |
| 3253 | 4.1603627 | 1.7435515 | SYNGAP1  | 2.386142696 |
| 3254 | 2.3345724 | 0.9783876 | FRRS1    | 2.386142695 |
| 3255 | 115.63095 | 48.473533 | RRBP1    | 2.385444994 |
| 3256 | 153.58458 | 64.38593  | MYADM    | 2.385374953 |
| 3257 | 17.690438 | 7.417119  | TBC1D10A | 2.385082188 |
| 3258 | 10.569612 | 4.4334094 | KIF13B   | 2.384082125 |
| 3259 | 4.7404178 | 1.9895281 | CHST7    | 2.382684519 |
| 3260 | 24.629032 | 10.339143 | CAP2     | 2.382115451 |
| 3261 | 221.50124 | 93.052542 | OST4     | 2.380388877 |
| 3262 | 15.665074 | 6.5824336 | PEX16    | 2.37983015  |
| 3263 | 2.3576923 | 0.9913814 | TLE6     | 2.378188888 |
| 3264 | 2.4593066 | 1.034109  | CASD1    | 2.378188887 |
| 3265 | 1.5338203 | 0.6449531 | OTUD1    | 2.378188887 |
| 3266 | 22.691737 | 9.5514918 | UBQLN4   | 2.375726994 |

|      |           |           |              |             |
|------|-----------|-----------|--------------|-------------|
| 3267 | 62.797188 | 26.438786 | PRDX2        | 2.3751918   |
| 3268 | 3.2640886 | 1.3760295 | LOC100506730 | 2.372106562 |
| 3269 | 201.61804 | 85.008291 | PDLIM1       | 2.371745594 |
| 3270 | 61.004962 | 25.737937 | NDUFB2       | 2.370235078 |
| 3271 | 13.151853 | 5.5487548 | PPP3CC       | 2.370235078 |
| 3272 | 58.15237  | 24.537888 | MARCKS       | 2.36990114  |
| 3273 | 2.1134644 | 0.8924415 | SARM1        | 2.368182482 |
| 3274 | 10.360432 | 4.3764675 | TMEM128      | 2.367304727 |
| 3275 | 15.084879 | 6.3749927 | CCDC115      | 2.366258174 |
| 3276 | 10.007886 | 4.2294141 | CD83         | 2.366258173 |
| 3277 | 0.3505458 | 0.1483216 | IKZF2        | 2.363417534 |
| 3278 | 1.1497903 | 0.4864948 | IGIP         | 2.363417531 |
| 3279 | 1.1249636 | 0.4759902 | FLJ43663     | 2.36341753  |
| 3280 | 3.5969709 | 1.5219363 | CCZ1B        | 2.363417529 |
| 3281 | 17.393803 | 7.359598  | EVI5L        | 2.363417528 |
| 3282 | 8.8680638 | 3.7522206 | NAAA         | 2.363417528 |
| 3283 | 6.53162   | 2.7636336 | TP53I3       | 2.363417528 |
| 3284 | 17.626742 | 7.4581582 | ABHD16A      | 2.363417527 |
| 3285 | 1.3391133 | 0.5666004 | LOC100996485 | 2.363417526 |
| 3286 | 96.575378 | 40.867804 | TTYH3        | 2.363116379 |
| 3287 | 13.090094 | 5.5425658 | ALAD         | 2.361738963 |
| 3288 | 9.7851531 | 4.1451439 | PCCA         | 2.360630479 |
| 3289 | 6.110569  | 2.5889978 | PAFAH2       | 2.360206363 |
| 3290 | 14.915198 | 6.3222148 | RXRA         | 2.359172885 |
| 3291 | 3.084594  | 1.3084124 | C9orf3       | 2.357508984 |
| 3292 | 23.133531 | 9.8160558 | BTN2A1       | 2.356703273 |
| 3293 | 15.001687 | 6.3655391 | SH2B1        | 2.356703273 |
| 3294 | 4.8077399 | 2.0458563 | SETD4        | 2.34998902  |
| 3295 | 4.4828666 | 1.9076117 | RPL23AP53    | 2.349989019 |
| 3296 | 72.237066 | 30.753772 | GALNT2       | 2.348884766 |
| 3297 | 5.7442422 | 2.4474777 | MYBL1        | 2.347004906 |
| 3298 | 14.295057 | 6.099296  | SMIM19       | 2.343722382 |
| 3299 | 12.009463 | 5.1240978 | PARP3        | 2.343722382 |
| 3300 | 58.208136 | 24.845985 | VPS28        | 2.342758284 |
| 3301 | 57.78721  | 24.671653 | PAM          | 2.342251251 |
| 3302 | 14.319311 | 6.1153545 | GNAO1        | 2.341534033 |
| 3303 | 94.569659 | 40.393286 | HSD17B10     | 2.341222221 |
| 3304 | 5.6042392 | 2.3948775 | DECR2        | 2.340094329 |
| 3305 | 4.2409742 | 1.8123091 | AGA          | 2.340094328 |
| 3306 | 5.4508385 | 2.3293243 | GATSL3       | 2.340094328 |
| 3307 | 15.123281 | 6.4673079 | ZSWIM8       | 2.338419842 |
| 3308 | 6.7119163 | 2.8731742 | LINC00847    | 2.336063159 |
| 3309 | 54.096286 | 23.169283 | BRI3         | 2.3348278   |

|      |           |           |              |             |
|------|-----------|-----------|--------------|-------------|
| 3310 | 14.266517 | 6.112803  | TCEAL3       | 2.333874809 |
| 3311 | 70.910377 | 30.388441 | IGF2R        | 2.333465391 |
| 3312 | 5.9287986 | 2.5435985 | FOXD2        | 2.330870465 |
| 3313 | 6.6665305 | 2.8604448 | PKP2         | 2.330592285 |
| 3314 | 33.023456 | 14.173548 | PNRC1        | 2.329935779 |
| 3315 | 78.174614 | 33.580647 | RABL6        | 2.327966265 |
| 3316 | 0.440074  | 0.189158  | ENTPD1-AS1   | 2.326489134 |
| 3317 | 0.3737735 | 0.1606599 | MYOM2        | 2.326489132 |
| 3318 | 0.7944072 | 0.3414618 | ZNF429       | 2.326489131 |
| 3319 | 0.9298937 | 0.3996983 | TPI1P2       | 2.32648913  |
| 3320 | 2.537446  | 1.0906761 | RUFY3        | 2.32648913  |
| 3321 | 1.6196852 | 0.6961929 | EPM2A        | 2.32648913  |
| 3322 | 10.492255 | 4.5099093 | TMEM63A      | 2.32648913  |
| 3323 | 15.863246 | 6.8185341 | SPPL2A       | 2.32648913  |
| 3324 | 0.9545015 | 0.4102755 | LOC100133612 | 2.326489129 |
| 3325 | 2.4311024 | 1.0449662 | RASL11A      | 2.326489129 |
| 3326 | 4.7603947 | 2.046171  | TFEB         | 2.326489129 |
| 3327 | 2.3938679 | 1.0289616 | WHAMMP1      | 2.326489129 |
| 3328 | 2.8119873 | 1.2086827 | MRPL42P5     | 2.326489128 |
| 3329 | 0.6793175 | 0.2919925 | GSG1         | 2.326489128 |
| 3330 | 0.3324345 | 0.1428911 | BMP8A        | 2.326489127 |
| 3331 | 0.4563493 | 0.1961536 | ZNF615       | 2.326489121 |
| 3332 | 0.1585524 | 0.0681509 | HYDIN2       | 2.326489117 |
| 3333 | 0.0232537 | 0.01      | ATP2B2       | 2.3253682   |
| 3334 | 1.4954347 | 0.6437514 | SHOX         | 2.323000078 |
| 3335 | 10.288235 | 4.4289563 | SLC12A9      | 2.32294805  |
| 3336 | 11.017027 | 4.743111  | TCF7L1       | 2.322742769 |
| 3337 | 94.075709 | 40.520457 | SLC35A4      | 2.321684319 |
| 3338 | 9.9237857 | 4.2761212 | MAN2B2       | 2.320744711 |
| 3339 | 49.279654 | 21.245784 | GTF3A        | 2.319502675 |
| 3340 | 97.315332 | 41.979731 | SEPW1        | 2.318150459 |
| 3341 | 7.7761008 | 3.3552741 | IFI44        | 2.317575378 |
| 3342 | 13.882086 | 5.9903595 | RNF213       | 2.317404507 |
| 3343 | 44.549169 | 19.229807 | LINC00152    | 2.31667272  |
| 3344 | 10.642116 | 4.59653   | AGXT2L2      | 2.315250051 |
| 3345 | 8.2360493 | 3.55782   | MYO18A       | 2.314914556 |
| 3346 | 8.4094022 | 3.6329804 | PASK         | 2.314739184 |
| 3347 | 64.334057 | 27.839889 | USB1         | 2.31085897  |
| 3348 | 81.259121 | 35.168192 | DPYSL3       | 2.310585658 |
| 3349 | 102.69191 | 44.515518 | AP3S1        | 2.306878877 |
| 3350 | 25.848    | 11.21242  | GLTPD1       | 2.305300704 |
| 3351 | 152.32517 | 66.09633  | TMEM109      | 2.304593529 |
| 3352 | 84.28897  | 36.586711 | PTOV1        | 2.303813796 |

|      |           |           |           |             |
|------|-----------|-----------|-----------|-------------|
| 3353 | 184.22466 | 79.971692 | GNB2      | 2.303623419 |
| 3354 | 32.8354   | 14.256191 | C15orf52  | 2.303237916 |
| 3355 | 26.703    | 11.602569 | TRPT1     | 2.301473117 |
| 3356 | 2.4809464 | 1.0797206 | ZNF222    | 2.297767041 |
| 3357 | 1.8540881 | 0.8069086 | FAM156A   | 2.297767041 |
| 3358 | 3.2172829 | 1.400178  | COLGALT2  | 2.29776704  |
| 3359 | 3.1719863 | 1.3804647 | HOOK2     | 2.29776704  |
| 3360 | 48.952648 | 21.342949 | TIMP3     | 2.293621585 |
| 3361 | 6.4449613 | 2.8102846 | NAV2      | 2.293348258 |
| 3362 | 4.8516621 | 2.1160684 | TGFBR3    | 2.292771895 |
| 3363 | 38.673255 | 16.869644 | SHARPIN   | 2.29247613  |
| 3364 | 87.522453 | 38.193446 | MIEN1     | 2.29155686  |
| 3365 | 14.866884 | 6.4892299 | SAC3D1    | 2.291008904 |
| 3366 | 71.169204 | 31.084218 | AMFR      | 2.289560731 |
| 3367 | 1.2568841 | 0.548963  | NECAB1    | 2.289560729 |
| 3368 | 100.32921 | 43.858321 | CD276     | 2.287575332 |
| 3369 | 6.880671  | 3.0081768 | MLYCD     | 2.287322646 |
| 3370 | 0.0228709 | 0.01      | ABCA12    | 2.2870885   |
| 3371 | 13.67664  | 5.9805187 | IL7R      | 2.286865226 |
| 3372 | 5.7764587 | 2.5272457 | TK2       | 2.285673531 |
| 3373 | 11.192812 | 4.8969426 | PYCARD    | 2.28567353  |
| 3374 | 6.1552595 | 2.692974  | AVPI1     | 2.28567353  |
| 3375 | 10.120784 | 4.429623  | ZDHHC14   | 2.284795776 |
| 3376 | 10.804699 | 4.7329103 | PKD1      | 2.282886923 |
| 3377 | 15.599963 | 6.834316  | SLC22A18  | 2.282593109 |
| 3378 | 6.6191405 | 2.9006886 | TNFAIP8   | 2.281920372 |
| 3379 | 14.703634 | 6.4464975 | ATG2A     | 2.280871696 |
| 3380 | 22.132487 | 9.7035214 | SLC35C1   | 2.280871695 |
| 3381 | 77.461559 | 33.992507 | VPS51     | 2.278783343 |
| 3382 | 11.750658 | 5.160018  | NKX3-1    | 2.277251263 |
| 3383 | 94.500967 | 41.528156 | NANS      | 2.275587822 |
| 3384 | 0.0227486 | 0.01      | COL6A4P2  | 2.2748554   |
| 3385 | 0.6913132 | 0.3039021 | SAMD14    | 2.274789374 |
| 3386 | 12.147435 | 5.3400262 | ZNHIT2    | 2.274789371 |
| 3387 | 2.9364575 | 1.2908701 | SLC39A4   | 2.274789371 |
| 3388 | 5.1514483 | 2.2645826 | HIST1H2BG | 2.274789371 |
| 3389 | 4.1566537 | 1.8272697 | KIFC2     | 2.274789371 |
| 3390 | 8.6750975 | 3.8135827 | ABHD8     | 2.27478937  |
| 3391 | 0.8816902 | 0.387592  | MATN3     | 2.274789369 |
| 3392 | 46.256324 | 20.345149 | SYNGR2    | 2.273580019 |
| 3393 | 13.18684  | 5.8033644 | LAMA5     | 2.272275097 |
| 3394 | 34.70967  | 15.279142 | FAM53C    | 2.271702818 |
| 3395 | 0.3969514 | 0.174803  | ERBB3     | 2.270850338 |

|      |           |           |           |             |
|------|-----------|-----------|-----------|-------------|
| 3396 | 10.075294 | 4.4446514 | LIN37     | 2.266835561 |
| 3397 | 9.5042671 | 4.1971647 | JPH2      | 2.264449419 |
| 3398 | 39.800888 | 17.594136 | TPRG1L    | 2.262167833 |
| 3399 | 2.6698325 | 1.1803681 | ZNF155    | 2.261864432 |
| 3400 | 597.98454 | 264.51214 | P4HB      | 2.26070737  |
| 3401 | 16.853354 | 7.4623107 | PDGFC     | 2.258463132 |
| 3402 | 62.346665 | 27.636062 | LOC550643 | 2.255989459 |
| 3403 | 14.497357 | 6.4261632 | SNHG9     | 2.255989458 |
| 3404 | 45.077388 | 20.008098 | JOSD1     | 2.252957215 |
| 3405 | 130.37256 | 57.873704 | HN1       | 2.25270816  |
| 3406 | 37.912495 | 16.834088 | CYB5A     | 2.252126463 |
| 3407 | 43.564379 | 19.35057  | AGRN      | 2.251322813 |
| 3408 | 6.1636943 | 2.7388596 | AKR1C3    | 2.250460072 |
| 3409 | 158.2129  | 70.314009 | AKR1B1    | 2.250090701 |
| 3410 | 8.3321491 | 3.7049237 | SLC2A8    | 2.248939491 |
| 3411 | 5.2859348 | 2.3504122 | TRIM6     | 2.248939491 |
| 3412 | 69.64341  | 30.967878 | MAPKAPK2  | 2.248891886 |
| 3413 | 2.1808236 | 0.9701968 | NACAD     | 2.247815585 |
| 3414 | 14.665693 | 6.5244201 | TM2D3     | 2.247815584 |
| 3415 | 4.6229467 | 2.058059  | ENDOV     | 2.246265366 |
| 3416 | 0.7791756 | 0.3477961 | TMEM169   | 2.240322868 |
| 3417 | 1.1039908 | 0.492782  | XKR5      | 2.240322866 |
| 3418 | 10.687154 | 4.7703632 | PPAPDC1A  | 2.240322866 |
| 3419 | 3.9107809 | 1.7456327 | CLTCL1    | 2.240322866 |
| 3420 | 25.85368  | 11.540158 | HOMER3    | 2.240322865 |
| 3421 | 7.5046911 | 3.3498257 | STK19     | 2.240322865 |
| 3422 | 1.2047107 | 0.5377398 | LYST      | 2.240322864 |
| 3423 | 1.265387  | 0.5648235 | KCNMB3    | 2.240322864 |
| 3424 | 9.0608478 | 4.0476483 | F11R      | 2.238546241 |
| 3425 | 9.9166309 | 4.4320183 | RCCD1     | 2.237497742 |
| 3426 | 80.702304 | 36.073718 | LAMC1     | 2.237149603 |
| 3427 | 18.371852 | 8.2123456 | NISCH     | 2.237101697 |
| 3428 | 9.8882484 | 4.4207003 | PIM2      | 2.236805875 |
| 3429 | 2.8060161 | 1.2547499 | UNC5B     | 2.236315131 |
| 3430 | 9.3295803 | 4.1730668 | PTGES     | 2.235665229 |
| 3431 | 3.1412298 | 1.4056205 | ABCG2     | 2.234763751 |
| 3432 | 5.4103716 | 2.4224501 | OGFOD2    | 2.233429564 |
| 3433 | 2.9019012 | 1.2993028 | ITGAE     | 2.233429563 |
| 3434 | 2.1138989 | 0.9474045 | GJD3      | 2.231252733 |
| 3435 | 2.3557705 | 1.0558062 | LRP5L     | 2.231252732 |
| 3436 | 4.6818518 | 2.0983064 | THAP8     | 2.231252732 |
| 3437 | 2.3297558 | 1.044147  | ADAMTS9   | 2.231252731 |
| 3438 | 18.720003 | 8.3928312 | HEIH      | 2.230475292 |



|      |           |           |              |             |
|------|-----------|-----------|--------------|-------------|
| 3439 | 24.003649 | 10.762264 | AK1          | 2.230353215 |
| 3440 | 13.779327 | 6.1836665 | SNX19        | 2.228342528 |
| 3441 | 9.6148997 | 4.3157045 | CPD          | 2.227886497 |
| 3442 | 13.138612 | 5.8995148 | DRAM1        | 2.227066517 |
| 3443 | 3.1287861 | 1.4048912 | EID2B        | 2.227066517 |
| 3444 | 6.8730106 | 3.0861272 | PRR24        | 2.227066516 |
| 3445 | 2.7182544 | 1.2205537 | FMN2         | 2.227066516 |
| 3446 | 82.17121  | 36.899349 | CPT1A        | 2.226901329 |
| 3447 | 14.165978 | 6.3677156 | TANK         | 2.224656272 |
| 3448 | 53.052249 | 23.850669 | EHBP1L1      | 2.224350582 |
| 3449 | 259.32002 | 116.60791 | SLC25A6      | 2.223863026 |
| 3450 | 41.337519 | 18.60142  | DUSP3        | 2.222277574 |
| 3451 | 0.0222127 | 0.01      | STXBP5L      | 2.2212695   |
| 3452 | 1.8540881 | 0.8367941 | CA11         | 2.215703933 |
| 3453 | 67.640182 | 30.540472 | NECAP2       | 2.214771985 |
| 3454 | 371.67598 | 167.89812 | PTMS         | 2.213699468 |
| 3455 | 45.010079 | 20.335018 | GNS          | 2.213427036 |
| 3456 | 8.9634194 | 4.0516865 | NIT1         | 2.212268732 |
| 3457 | 59.957329 | 27.110376 | NCSTN        | 2.211600777 |
| 3458 | 15.763321 | 7.1298203 | PLCD3        | 2.210900238 |
| 3459 | 1.4502186 | 0.6565076 | DDX60L       | 2.208989679 |
| 3460 | 5.9415151 | 2.6904047 | TBX18        | 2.208409433 |
| 3461 | 2.9313336 | 1.3288869 | ZNF775       | 2.20585636  |
| 3462 | 145.01919 | 65.761835 | GRINA        | 2.20521809  |
| 3463 | 516.81965 | 234.36483 | MYH9         | 2.205192859 |
| 3464 | 4.6402253 | 2.1048347 | AHCYL2       | 2.204555736 |
| 3465 | 2.3879416 | 1.0834373 | AGO4         | 2.204042334 |
| 3466 | 19.560964 | 8.8768366 | AIG1         | 2.203596261 |
| 3467 | 34.050643 | 15.468096 | ST3GAL1      | 2.201346722 |
| 3468 | 12.273233 | 5.5787684 | TBX2         | 2.199989721 |
| 3469 | 19.913118 | 9.0523472 | TANGO2       | 2.199774035 |
| 3470 | 18.276494 | 8.3098315 | CYBRD1       | 2.199381988 |
| 3471 | 1.433458  | 0.6523904 | TRAF3IP2-AS1 | 2.197239734 |
| 3472 | 2.506101  | 1.1405679 | AXIN2        | 2.197239733 |
| 3473 | 6.298296  | 2.8664583 | IFT20        | 2.197239733 |
| 3474 | 2.9622003 | 1.3481461 | RBKS         | 2.197239732 |
| 3475 | 1.8558363 | 0.8446217 | LHX4         | 2.197239732 |
| 3476 | 2.9375978 | 1.3383303 | DNAL1        | 2.1949722   |
| 3477 | 8.7733965 | 4.0000475 | SAR1B        | 2.193323085 |
| 3478 | 57.062591 | 26.021279 | CHPF         | 2.192920345 |
| 3479 | 35.750542 | 16.303731 | ZBTB8OS      | 2.192782857 |
| 3480 | 30.17807  | 13.766929 | USF1         | 2.192069757 |
| 3481 | 17.197548 | 7.848873  | ZER1         | 2.191085    |

|      |           |           |              |             |
|------|-----------|-----------|--------------|-------------|
| 3482 | 43.806225 | 19.992937 | TOR1A        | 2.191085    |
| 3483 | 2.1796578 | 0.9954426 | GUSBP11      | 2.189636827 |
| 3484 | 23.258643 | 10.623532 | IPO13        | 2.189351273 |
| 3485 | 17.913997 | 8.1932954 | ERAP1        | 2.186421502 |
| 3486 | 6.2629876 | 2.8648333 | AKNA         | 2.186161214 |
| 3487 | 0.0218402 | 0.01      | DNAH12       | 2.1840233   |
| 3488 | 2.7516265 | 1.2605494 | JMJD7        | 2.182878689 |
| 3489 | 4.1353426 | 1.8944445 | TSNARE1      | 2.182878689 |
| 3490 | 1.116321  | 0.5113985 | CHRD         | 2.182878688 |
| 3491 | 33.002066 | 15.131983 | ALKBH3       | 2.180947792 |
| 3492 | 14.28057  | 6.5544015 | COMMD6       | 2.178775534 |
| 3493 | 19.064563 | 8.7579396 | SIRT7        | 2.176831933 |
| 3494 | 40.864348 | 18.79547  | NRSN2        | 2.174159484 |
| 3495 | 3.686908  | 1.6965791 | CRTC1        | 2.173142388 |
| 3496 | 39.898708 | 18.374733 | STARD3NL     | 2.171389855 |
| 3497 | 23.914697 | 11.013544 | HHLA3        | 2.171389854 |
| 3498 | 2.2500717 | 1.0362357 | LOC100506746 | 2.171389854 |
| 3499 | 1.03363   | 0.4760223 | EPHB3        | 2.171389852 |
| 3500 | 47.881929 | 22.059963 | PXDC1        | 2.170535312 |
| 3501 | 10.046417 | 4.6307803 | AAK1         | 2.169486796 |
| 3502 | 52.395601 | 24.158824 | PLOD3        | 2.168797665 |
| 3503 | 2.8485797 | 1.3148508 | MOSPD2       | 2.166466068 |
| 3504 | 70.341139 | 32.50142  | LARP6        | 2.164248145 |
| 3505 | 9.1773747 | 4.241459  | TOR2A        | 2.16373063  |
| 3506 | 9.1748208 | 4.241573  | NEK7         | 2.163070352 |
| 3507 | 1.0723017 | 0.495979  | NLRP3        | 2.161989899 |
| 3508 | 2.5590969 | 1.1836766 | C4orf33      | 2.161989898 |
| 3509 | 4.2568282 | 1.9689399 | MXD1         | 2.161989898 |
| 3510 | 4.8711265 | 2.2530755 | HKR1         | 2.161989898 |
| 3511 | 3.8988065 | 1.8050857 | PPARA        | 2.159901019 |
| 3512 | 26.202601 | 12.133674 | GTPBP6       | 2.159494333 |
| 3513 | 16.135621 | 7.4728755 | SMIM11       | 2.159225205 |
| 3514 | 30.628087 | 14.189134 | GPR137       | 2.158559257 |
| 3515 | 15.141033 | 7.0165497 | YIPF4        | 2.15790296  |
| 3516 | 3.8326345 | 1.7760921 | SMCR7        | 2.15790296  |
| 3517 | 30.399305 | 14.09582  | DGCR2        | 2.156618495 |
| 3518 | 17.738335 | 8.2264427 | SCOC         | 2.156258217 |
| 3519 | 11.258628 | 5.2220225 | RBM4B        | 2.155989925 |
| 3520 | 27.881314 | 12.967075 | KAT5         | 2.150162138 |
| 3521 | 15.767557 | 7.3368595 | STRADA       | 2.149087998 |
| 3522 | 263.99252 | 122.91256 | TMED9        | 2.147807509 |
| 3523 | 3.3452952 | 1.557742  | HOPX         | 2.147528426 |
| 3524 | 103.52604 | 48.21511  | CHMP2A       | 2.147170147 |

|      |           |           |              |             |
|------|-----------|-----------|--------------|-------------|
| 3525 | 21.712444 | 10.112819 | PNKD         | 2.147021815 |
| 3526 | 17.782267 | 8.2842247 | TMEM159      | 2.146521615 |
| 3527 | 334.34377 | 156.01172 | TPM1         | 2.143068347 |
| 3528 | 29.347217 | 13.69421  | RMND5B       | 2.143038373 |
| 3529 | 0.8227043 | 0.3841097 | PLXNC1       | 2.141847133 |
| 3530 | 66.791496 | 31.206365 | NKIRAS2      | 2.140316424 |
| 3531 | 6.572486  | 3.0710693 | MOB3C        | 2.140129534 |
| 3532 | 60.714815 | 28.407138 | CDKN2AIPNL   | 2.137308449 |
| 3533 | 18.309301 | 8.5717047 | LOC100507217 | 2.136016335 |
| 3534 | 173.06761 | 81.030316 | PTTG1IP      | 2.135837788 |
| 3535 | 310.23107 | 145.38929 | GNAI2        | 2.133795953 |
| 3536 | 6.2068443 | 2.9104382 | TMEM234      | 2.132615035 |
| 3537 | 5.8728776 | 2.755123  | MBNL2        | 2.131620809 |
| 3538 | 5.1332919 | 2.4088214 | IQCE         | 2.131038823 |
| 3539 | 5.4316466 | 2.5492829 | CEP89        | 2.130656711 |
| 3540 | 17.889122 | 8.3960601 | TNFAIP3      | 2.13065671  |
| 3541 | 67.888624 | 31.872144 | ADRBK1       | 2.130030047 |
| 3542 | 16.474897 | 7.7360765 | NFKBIZ       | 2.129619188 |
| 3543 | 75.583255 | 35.493909 | DEGS1        | 2.129471131 |
| 3544 | 11.299741 | 5.3079991 | FAM98C       | 2.128813582 |
| 3545 | 37.545351 | 17.640949 | UROS         | 2.128306722 |
| 3546 | 211.71796 | 99.490179 | ATP5H        | 2.128028767 |
| 3547 | 10.039989 | 4.7200901 | TMCO4        | 2.127075775 |
| 3548 | 20.205799 | 9.500167  | BAIAP2       | 2.126888795 |
| 3549 | 13.839029 | 6.5130874 | IFFO1        | 2.124803259 |
| 3550 | 7.7916064 | 3.6672465 | ZDHHC2       | 2.124647606 |
| 3551 | 64.541003 | 30.388225 | SDHAF2       | 2.123881968 |
| 3552 | 23.394922 | 11.01517  | TMEM51       | 2.123881967 |
| 3553 | 62.681548 | 29.528461 | LGMN         | 2.122750206 |
| 3554 | 14.605777 | 6.8905247 | OGFRL1       | 2.119690096 |
| 3555 | 48.347826 | 22.808913 | ATPIF1       | 2.119690096 |
| 3556 | 3.5527566 | 1.6760736 | SLFN12       | 2.119690095 |
| 3557 | 11.03925  | 5.2079547 | LY6G5B       | 2.119690095 |
| 3558 | 6.0656819 | 2.8632924 | FAM114A2     | 2.118429126 |
| 3559 | 79.224564 | 37.419001 | ATP6V1B2     | 2.117228202 |
| 3560 | 18.467794 | 8.725015  | TFPI         | 2.116648933 |
| 3561 | 15.041507 | 7.1069213 | JMJD6        | 2.11645886  |
| 3562 | 3.5569799 | 1.681795  | ARL17A       | 2.114990118 |
| 3563 | 3.3576719 | 1.5875591 | ABAT         | 2.114990118 |
| 3564 | 277.10514 | 131.34827 | PRDX5        | 2.109697705 |
| 3565 | 42.066013 | 19.948422 | FTSJ1        | 2.108738915 |
| 3566 | 41.991409 | 19.913771 | EMC1         | 2.108661856 |
| 3567 | 73.761472 | 35.036095 | TSPO         | 2.105299441 |

|      |           |           |           |             |
|------|-----------|-----------|-----------|-------------|
| 3568 | 81.321761 | 38.647718 | PGLS      | 2.104180167 |
| 3569 | 30.265488 | 14.384328 | FZR1      | 2.104059936 |
| 3570 | 34.353492 | 16.3295   | XYLT2     | 2.103768717 |
| 3571 | 62.238772 | 29.643197 | TMEM9     | 2.099597176 |
| 3572 | 11.251222 | 5.3594512 | FLCN      | 2.099323524 |
| 3573 | 6.3530977 | 3.0288427 | DPF1      | 2.097533056 |
| 3574 | 107.7989  | 51.448187 | PSME1     | 2.09529054  |
| 3575 | 87.850604 | 41.933933 | AP2A1     | 2.094976475 |
| 3576 | 157.80251 | 75.338198 | ATP6V1F   | 2.094588283 |
| 3577 | 6.0258347 | 2.8787534 | GLTSCR1   | 2.093209732 |
| 3578 | 42.697096 | 20.403759 | GOSR2     | 2.092609269 |
| 3579 | 5.3918886 | 2.5782306 | SDK1      | 2.091313536 |
| 3580 | 20.536946 | 9.8223372 | KCTD2     | 2.090841059 |
| 3581 | 4.1968717 | 2.0076226 | PRRG1     | 2.090468493 |
| 3582 | 40.632666 | 19.445822 | NENF      | 2.089531903 |
| 3583 | 7.1765792 | 3.4366233 | C21orf58  | 2.088264752 |
| 3584 | 81.516266 | 39.069275 | SNX17     | 2.086454536 |
| 3585 | 28.868162 | 13.844157 | B4GALT7   | 2.085223591 |
| 3586 | 19.155137 | 9.1950712 | FUNDC2    | 2.083196148 |
| 3587 | 29.443216 | 14.136623 | SIL1      | 2.082761696 |
| 3588 | 42.921174 | 20.610383 | ENTPD6    | 2.08250255  |
| 3589 | 7.3826737 | 3.5460154 | POLH      | 2.081963245 |
| 3590 | 11.842573 | 5.6905933 | NAGLU     | 2.081078884 |
| 3591 | 122.66034 | 58.983163 | H1FX      | 2.07958221  |
| 3592 | 0.0207714 | 0.01      | WDFY4     | 2.0771404   |
| 3593 | 30.427817 | 14.653658 | CHMP6     | 2.076465707 |
| 3594 | 55.636681 | 26.837964 | TMEM214   | 2.073058941 |
| 3595 | 33.454725 | 16.143062 | ELK1      | 2.072390316 |
| 3596 | 29.429057 | 14.201042 | TPBG      | 2.072316676 |
| 3597 | 57.997023 | 28.012616 | DPP3      | 2.070389398 |
| 3598 | 0.0438274 | 0.0211933 | CALN1     | 2.067990361 |
| 3599 | 0.1107624 | 0.0535604 | SPATA6L   | 2.067990361 |
| 3600 | 0.0847669 | 0.04099   | TMC5      | 2.067990359 |
| 3601 | 0.1321074 | 0.063882  | AGAP11    | 2.067990358 |
| 3602 | 0.1256554 | 0.0607621 | TCAM1P    | 2.067990356 |
| 3603 | 0.1139729 | 0.0551129 | FFAR4     | 2.067990353 |
| 3604 | 0.1653964 | 0.0799793 | FAM133CP  | 2.067990352 |
| 3605 | 0.1526177 | 0.0738    | GSDMC     | 2.06799035  |
| 3606 | 0.1233985 | 0.0596707 | SLC7A14   | 2.06799035  |
| 3607 | 0.1296017 | 0.0626704 | DERL3     | 2.06799035  |
| 3608 | 0.1547138 | 0.0748136 | LOC641367 | 2.067990349 |
| 3609 | 0.1097128 | 0.0530529 | LOC339505 | 2.067990349 |
| 3610 | 0.1274225 | 0.0616166 | PCDHB11   | 2.067990348 |

|      |           |           |              |             |
|------|-----------|-----------|--------------|-------------|
| 3611 | 0.0912232 | 0.044112  | KIAA1107     | 2.067990348 |
| 3612 | 0.1218354 | 0.0589149 | KCNH6        | 2.067990348 |
| 3613 | 0.2467726 | 0.1193297 | OTUD6A       | 2.067990347 |
| 3614 | 0.1715928 | 0.0829756 | SLC52A1      | 2.067990347 |
| 3615 | 0.1464508 | 0.0708179 | PRSS36       | 2.067990346 |
| 3616 | 0.3098877 | 0.1498497 | LINC00852    | 2.067990346 |
| 3617 | 0.0983364 | 0.0475517 | FRMPD4       | 2.067990346 |
| 3618 | 0.2373571 | 0.1147767 | RSAD2        | 2.067990346 |
| 3619 | 0.1728022 | 0.0835605 | PIPOX        | 2.067990345 |
| 3620 | 0.1728022 | 0.0835605 | RRN3P2       | 2.067990345 |
| 3621 | 0.1399124 | 0.0676562 | LOC643623    | 2.067990345 |
| 3622 | 0.3108121 | 0.1502967 | PDZD9        | 2.067990345 |
| 3623 | 0.2044134 | 0.0988464 | BCL2L14      | 2.067990344 |
| 3624 | 0.0895572 | 0.0433064 | CIITA        | 2.067990344 |
| 3625 | 0.2391274 | 0.1156327 | LOC100506314 | 2.067990344 |
| 3626 | 0.1770599 | 0.0856193 | CYP2W1       | 2.067990343 |
| 3627 | 0.3377626 | 0.1633289 | SMG7-AS1     | 2.067990343 |
| 3628 | 0.185988  | 0.0899366 | CRX          | 2.067990343 |
| 3629 | 0.2841166 | 0.1373878 | LOC100996291 | 2.067990343 |
| 3630 | 0.1645476 | 0.0795688 | CHADL        | 2.067990342 |
| 3631 | 0.2582398 | 0.1248748 | RBM14-RBM4   | 2.067990342 |
| 3632 | 0.1992347 | 0.0963422 | LINC00520    | 2.067990342 |
| 3633 | 0.4570164 | 0.2209954 | OXCT2        | 2.067990342 |
| 3634 | 0.3660949 | 0.1770293 | PAQR6        | 2.067990342 |
| 3635 | 0.244744  | 0.1183487 | TMEM178A     | 2.067990342 |
| 3636 | 0.2649146 | 0.1281024 | KCND1        | 2.067990342 |
| 3637 | 0.1657252 | 0.0801383 | LHX9         | 2.067990342 |
| 3638 | 0.4170075 | 0.2016487 | FGF18        | 2.067990341 |
| 3639 | 0.3845009 | 0.1859297 | FLRT1        | 2.067990341 |
| 3640 | 0.1081191 | 0.0522822 | FAM184B      | 2.067990341 |
| 3641 | 0.442932  | 0.2141847 | LOC100128750 | 2.067990341 |
| 3642 | 0.3380365 | 0.1634614 | ZNF205-AS1   | 2.067990341 |
| 3643 | 0.1187462 | 0.057421  | LOC100287846 | 2.067990341 |
| 3644 | 0.5764855 | 0.278766  | LINC00266-1  | 2.067990341 |
| 3645 | 0.1730893 | 0.0836993 | NRSN1        | 2.06799034  |
| 3646 | 0.2121115 | 0.1025689 | LOC100130476 | 2.06799034  |
| 3647 | 0.061204  | 0.0295959 | AFAP1-AS1    | 2.06799034  |
| 3648 | 0.1801206 | 0.0870993 | MYH11        | 2.06799034  |
| 3649 | 0.3347783 | 0.1618858 | PNOC         | 2.06799034  |
| 3650 | 0.8925032 | 0.43158   | HIST1H2BO    | 2.06799034  |
| 3651 | 0.1420099 | 0.0686705 | LOC100506895 | 2.06799034  |
| 3652 | 0.200577  | 0.0969913 | CPA5         | 2.06799034  |
| 3653 | 0.4368962 | 0.2112661 | TAS2R14      | 2.06799034  |

|      |           |           |              |             |
|------|-----------|-----------|--------------|-------------|
| 3654 | 0.1282458 | 0.0620147 | ZNF252P-AS1  | 2.067990339 |
| 3655 | 0.4638831 | 0.2243159 | LINC00311    | 2.067990339 |
| 3656 | 1.0342407 | 0.5001187 | ATL1         | 2.067990339 |
| 3657 | 0.449864  | 0.2175368 | MARCO        | 2.067990339 |
| 3658 | 0.2918761 | 0.1411399 | BCRP3        | 2.067990339 |
| 3659 | 1.003644  | 0.4853233 | MAB21L1      | 2.067990339 |
| 3660 | 0.2056236 | 0.0994316 | DYNAP        | 2.067990339 |
| 3661 | 0.4492982 | 0.2172632 | FES          | 2.067990339 |
| 3662 | 0.3364674 | 0.1627026 | ZNF493       | 2.067990339 |
| 3663 | 0.1151219 | 0.0556685 | KIAA0825     | 2.067990339 |
| 3664 | 0.2675218 | 0.1293632 | FBXL13       | 2.067990339 |
| 3665 | 0.272062  | 0.1315586 | PRR19        | 2.067990339 |
| 3666 | 0.5206733 | 0.2517774 | VIP          | 2.067990339 |
| 3667 | 0.8593794 | 0.4155626 | ODF3B        | 2.067990339 |
| 3668 | 0.7939029 | 0.3839007 | PIP5KL1      | 2.067990339 |
| 3669 | 0.1534606 | 0.0742076 | C16orf71     | 2.067990339 |
| 3670 | 0.8683313 | 0.4198913 | C2orf82      | 2.067990339 |
| 3671 | 0.2060302 | 0.0996282 | SH3PXD2A-AS1 | 2.067990339 |
| 3672 | 1.1171083 | 0.5401903 | CCPG1        | 2.067990339 |
| 3673 | 0.7933991 | 0.3836571 | LOC100506305 | 2.067990339 |
| 3674 | 1.8310774 | 0.8854381 | UBAC2-AS1    | 2.067990338 |
| 3675 | 0.5655346 | 0.2734706 | PAN3-AS1     | 2.067990338 |
| 3676 | 0.0992615 | 0.047999  | CILP2        | 2.067990338 |
| 3677 | 0.5731165 | 0.277137  | DGKG         | 2.067990338 |
| 3678 | 0.6997185 | 0.3383568 | MIPEPP3      | 2.067990338 |
| 3679 | 0.5614715 | 0.2715059 | LOC284865    | 2.067990338 |
| 3680 | 1.2104521 | 0.5853277 | FUT2         | 2.067990338 |
| 3681 | 0.1535737 | 0.0742623 | C18orf61     | 2.067990338 |
| 3682 | 0.2554698 | 0.1235353 | ELF3         | 2.067990338 |
| 3683 | 1.820083  | 0.8801216 | PRH1-PRR4    | 2.067990338 |
| 3684 | 0.4462516 | 0.21579   | MYL4         | 2.067990338 |
| 3685 | 2.9352042 | 1.419351  | PI4KAP2      | 2.067990338 |
| 3686 | 1.5234537 | 0.7366832 | TXNDC16      | 2.067990337 |
| 3687 | 0.2587207 | 0.1251073 | LOC100506124 | 2.067990337 |
| 3688 | 1.0854141 | 0.5248642 | PTCSC3       | 2.067990337 |
| 3689 | 1.38933   | 0.6718262 | PAM16        | 2.067990337 |
| 3690 | 0.5738398 | 0.2774867 | WWC2-AS2     | 2.067990337 |
| 3691 | 5.8052047 | 2.8071721 | NFATC4       | 2.067990337 |
| 3692 | 1.5908359 | 0.7692666 | LOC100131691 | 2.067990337 |
| 3693 | 24.592413 | 11.891938 | SAT2         | 2.067990337 |
| 3694 | 1.119675  | 0.5414314 | FAM221A      | 2.067990337 |
| 3695 | 1.8307423 | 0.885276  | TMSB15B      | 2.067990337 |
| 3696 | 0.143823  | 0.0695472 | RIMBP3       | 2.067990337 |

|      |           |           |              |             |
|------|-----------|-----------|--------------|-------------|
| 3697 | 0.2088695 | 0.1010012 | NCMAP        | 2.067990337 |
| 3698 | 0.1514531 | 0.0732369 | HSP90B2P     | 2.067990337 |
| 3699 | 0.5405953 | 0.261411  | MYLK-AS1     | 2.067990337 |
| 3700 | 9.7517964 | 4.7155909 | LMBRD1       | 2.067990337 |
| 3701 | 1.4949749 | 0.7229119 | SOX15        | 2.067990337 |
| 3702 | 8.8838153 | 4.2958689 | SAP30        | 2.067990337 |
| 3703 | 1.4450684 | 0.6987791 | C11orf71     | 2.067990337 |
| 3704 | 7.6336813 | 3.6913525 | HIST1H2AC    | 2.067990337 |
| 3705 | 4.7517801 | 2.2977768 | KCNAB2       | 2.067990337 |
| 3706 | 0.1351927 | 0.0653739 | GPD1         | 2.067990337 |
| 3707 | 1.8260635 | 0.8830136 | LOC100505865 | 2.067990337 |
| 3708 | 3.0582736 | 1.4788626 | LOC729970    | 2.067990337 |
| 3709 | 9.4727046 | 4.5806329 | VTRNA1-3     | 2.067990337 |
| 3710 | 0.3176822 | 0.1536188 | LOC100130275 | 2.067990337 |
| 3711 | 4.2176089 | 2.0394723 | POLR2J3      | 2.067990337 |
| 3712 | 6.4603845 | 3.1239916 | EFHD1        | 2.067990337 |
| 3713 | 0.3164761 | 0.1530356 | SLC10A5      | 2.067990337 |
| 3714 | 2.8431037 | 1.3748148 | IFITM1       | 2.067990337 |
| 3715 | 17.028753 | 8.2344451 | GNB5         | 2.067990337 |
| 3716 | 45.142918 | 21.829366 | METRNL       | 2.067990337 |
| 3717 | 10.156982 | 4.9115228 | LYRM5        | 2.067990337 |
| 3718 | 3.6950266 | 1.7867717 | S100A4       | 2.067990337 |
| 3719 | 0.4472092 | 0.2162531 | LY6G6C       | 2.067990337 |
| 3720 | 2.7709629 | 1.3399303 | RNF152       | 2.067990336 |
| 3721 | 55.848552 | 27.006196 | GUSB         | 2.067990336 |
| 3722 | 19.087381 | 9.2299181 | SNX11        | 2.067990336 |
| 3723 | 0.1528416 | 0.0739083 | GOLGA8S      | 2.067990336 |
| 3724 | 1.7439289 | 0.8432964 | HIST1H3J     | 2.067990336 |
| 3725 | 0.4857797 | 0.2349043 | NPPA         | 2.067990336 |
| 3726 | 1.178508  | 0.5698808 | TVP23C       | 2.067990336 |
| 3727 | 0.2756607 | 0.1332988 | TNFRSF10C    | 2.067990336 |
| 3728 | 27.2114   | 13.158379 | CDK5RAP3     | 2.067990336 |
| 3729 | 2.022887  | 0.9781898 | DISP1        | 2.067990336 |
| 3730 | 2.1456834 | 1.0375694 | HIST1H1D     | 2.067990336 |
| 3731 | 0.3392287 | 0.1640379 | HRH4         | 2.067990336 |
| 3732 | 2.1103747 | 1.0204954 | APOM         | 2.067990336 |
| 3733 | 0.4054465 | 0.1960582 | WDR86        | 2.067990336 |
| 3734 | 0.3430444 | 0.165883  | C21orf49     | 2.067990336 |
| 3735 | 0.5853919 | 0.2830728 | GATM-AS1     | 2.067990336 |
| 3736 | 0.5853919 | 0.2830728 | MBL1P        | 2.067990336 |
| 3737 | 0.1342348 | 0.0649107 | LOC648691    | 2.067990336 |
| 3738 | 0.1029642 | 0.0497895 | STX16-NPEPL1 | 2.067990336 |
| 3739 | 0.7690018 | 0.3718595 | HNRNPA1P33   | 2.067990336 |

|      |           |           |              |             |
|------|-----------|-----------|--------------|-------------|
| 3740 | 0.7429572 | 0.3592653 | HLA-DMA      | 2.067990336 |
| 3741 | 0.2112514 | 0.102153  | NCCRP1       | 2.067990336 |
| 3742 | 0.1265712 | 0.0612049 | MSH4         | 2.067990336 |
| 3743 | 0.574367  | 0.2777416 | FLJ31813     | 2.067990335 |
| 3744 | 1.8415272 | 0.8904912 | TRAM1L1      | 2.067990335 |
| 3745 | 0.4738147 | 0.2291184 | INMT         | 2.067990335 |
| 3746 | 0.2975011 | 0.14386   | ASB18        | 2.067990335 |
| 3747 | 0.2407851 | 0.1164343 | YPEL4        | 2.067990335 |
| 3748 | 0.3464663 | 0.1675377 | OR7E37P      | 2.067990335 |
| 3749 | 0.4263928 | 0.2061871 | TCEANC       | 2.067990335 |
| 3750 | 0.6427124 | 0.3107908 | LOC284581    | 2.067990335 |
| 3751 | 0.13074   | 0.0632208 | LOC100287225 | 2.067990335 |
| 3752 | 0.776162  | 0.3753219 | FMO4         | 2.067990335 |
| 3753 | 0.1803544 | 0.0872124 | LOC340508    | 2.067990335 |
| 3754 | 1.0456573 | 0.5056394 | ZNF254       | 2.067990335 |
| 3755 | 0.1174744 | 0.056806  | B3GALT2      | 2.067990334 |
| 3756 | 0.2021334 | 0.0977439 | CSTF3-AS1    | 2.067990334 |
| 3757 | 0.2162942 | 0.1045915 | CXorf21      | 2.067990334 |
| 3758 | 0.2162942 | 0.1045915 | WNT11        | 2.067990334 |
| 3759 | 0.3343755 | 0.161691  | BCL2L15      | 2.067990334 |
| 3760 | 0.2861844 | 0.1383877 | EMX2OS       | 2.067990334 |
| 3761 | 0.6788257 | 0.3282538 | LOC338817    | 2.067990334 |
| 3762 | 0.7058408 | 0.3413173 | LOC100507564 | 2.067990334 |
| 3763 | 0.5002088 | 0.2418816 | CCDC146      | 2.067990334 |
| 3764 | 0.2798561 | 0.1353276 | CACNB2       | 2.067990333 |
| 3765 | 0.265731  | 0.1284972 | FUT6         | 2.067990333 |
| 3766 | 0.1583583 | 0.0765759 | IL21R-AS1    | 2.067990333 |
| 3767 | 0.386641  | 0.1869646 | SUGT1P3      | 2.067990333 |
| 3768 | 0.3408005 | 0.1647979 | UBE2Q2P3     | 2.067990333 |
| 3769 | 0.4520597 | 0.2185985 | C4orf36      | 2.067990333 |
| 3770 | 0.1345815 | 0.0650784 | GFAP         | 2.067990332 |
| 3771 | 0.2341567 | 0.1132291 | ZMYND10      | 2.067990332 |
| 3772 | 0.3814745 | 0.1844663 | IRF4         | 2.067990332 |
| 3773 | 0.218907  | 0.105855  | MRPL23-AS1   | 2.067990332 |
| 3774 | 0.1899722 | 0.0918632 | LOC100506834 | 2.067990331 |
| 3775 | 0.1301683 | 0.0629444 | TMPRSS11BNL  | 2.067990331 |
| 3776 | 0.0970428 | 0.0469262 | PIGR         | 2.067990331 |
| 3777 | 0.2314264 | 0.1119089 | LOC553103    | 2.06799033  |
| 3778 | 0.2042131 | 0.0987496 | TLDC2        | 2.06799033  |
| 3779 | 0.1506321 | 0.0728398 | EPGN         | 2.06799033  |
| 3780 | 0.1935899 | 0.0936126 | AQP11        | 2.067990329 |
| 3781 | 0.0867247 | 0.0419367 | PNPLA7       | 2.067990329 |
| 3782 | 0.168608  | 0.0815323 | LCP2         | 2.067990329 |



|      |           |           |                |             |
|------|-----------|-----------|----------------|-------------|
| 3783 | 0.1000238 | 0.0483676 | SLC14A2        | 2.067990329 |
| 3784 | 0.0690065 | 0.0333688 | RASSF6         | 2.067990328 |
| 3785 | 0.1779671 | 0.086058  | C5AR1          | 2.067990328 |
| 3786 | 0.1057865 | 0.0511543 | ARMCX5-GPRASP2 | 2.067990328 |
| 3787 | 0.121233  | 0.0586236 | ANKRD30BP2     | 2.067990328 |
| 3788 | 0.1429842 | 0.0691416 | CCDC87         | 2.067990328 |
| 3789 | 0.1677935 | 0.0811384 | GGT8P          | 2.067990326 |
| 3790 | 0.1258451 | 0.0608538 | LOC100128682   | 2.067990326 |
| 3791 | 0.13715   | 0.0663205 | SLC1A6         | 2.067990326 |
| 3792 | 0.1324012 | 0.0640241 | LOC100130331   | 2.067990326 |
| 3793 | 0.0953337 | 0.0460997 | KCNA7          | 2.067990326 |
| 3794 | 0.1650689 | 0.0798209 | C17orf77       | 2.067990325 |
| 3795 | 0.1972546 | 0.0953847 | SIGLEC14       | 2.067990325 |
| 3796 | 0.1719468 | 0.0831468 | SCIMP          | 2.067990324 |
| 3797 | 0.1915437 | 0.0926231 | CCDC151        | 2.067990324 |
| 3798 | 0.0892312 | 0.0431488 | SEPT5-GP1BB    | 2.067990323 |
| 3799 | 0.1118323 | 0.0540778 | LOC286190      | 2.067990322 |
| 3800 | 0.0529403 | 0.0255999 | HYDIN          | 2.067990321 |
| 3801 | 0.07491   | 0.0362236 | PCYT1B         | 2.067990321 |
| 3802 | 0.1569273 | 0.075884  | NEK10          | 2.06799032  |
| 3803 | 0.1129231 | 0.0546052 | PIWIL3         | 2.067990319 |
| 3804 | 0.0417676 | 0.0201972 | CR1            | 2.067990319 |
| 3805 | 0.1044086 | 0.0504879 | HOXA-AS3       | 2.067990319 |
| 3806 | 0.1334611 | 0.0645366 | LOC100505989   | 2.067990318 |
| 3807 | 0.0490698 | 0.0237283 | SRRM4          | 2.067990318 |
| 3808 | 0.101584  | 0.0491221 | LOC100507557   | 2.067990316 |
| 3809 | 0.0546693 | 0.026436  | PKD1L2         | 2.067990313 |
| 3810 | 123.89706 | 60.072438 | UBE2Z          | 2.062460951 |
| 3811 | 189.95508 | 92.126836 | LMAN2          | 2.06188647  |
| 3812 | 262.39849 | 127.28406 | CALM3          | 2.061518879 |
| 3813 | 91.807352 | 44.548625 | SDC4           | 2.060834661 |
| 3814 | 34.53332  | 16.769287 | NFIX           | 2.059319517 |
| 3815 | 105.72348 | 51.350492 | CLTB           | 2.058860138 |
| 3816 | 52.999182 | 25.744317 | LSM10          | 2.058675065 |
| 3817 | 20.231142 | 9.8282883 | ST3GAL2        | 2.058460428 |
| 3818 | 19.504425 | 9.4780454 | ORMDL3         | 2.05785313  |
| 3819 | 70.324926 | 34.197995 | CCND3          | 2.056404957 |
| 3820 | 52.018086 | 25.312132 | CCDC167        | 2.055065397 |
| 3821 | 54.151051 | 26.361683 | TCF25          | 2.054157625 |
| 3822 | 9.0367925 | 4.3995695 | SLC6A9         | 2.054017429 |
| 3823 | 103.50779 | 50.3985   | ATN1           | 2.053787106 |
| 3824 | 59.081609 | 28.773161 | ITFG3          | 2.05335833  |
| 3825 | 12.402577 | 6.0411822 | PSEN2          | 2.053004899 |

|      |           |           |           |             |
|------|-----------|-----------|-----------|-------------|
| 3826 | 13.406687 | 6.5309762 | FAM222B   | 2.052784526 |
| 3827 | 218.78808 | 106.65309 | PTRF      | 2.051399317 |
| 3828 | 11.086998 | 5.4048298 | TSC22D3   | 2.051312996 |
| 3829 | 21.085227 | 10.279232 | MAP3K3    | 2.051245476 |
| 3830 | 36.195703 | 17.647491 | TSEN15    | 2.051039597 |
| 3831 | 127.11603 | 62.02935  | COL6A3    | 2.049288402 |
| 3832 | 18.726748 | 9.1386081 | SERTAD1   | 2.049190425 |
| 3833 | 3.367882  | 1.6437976 | EPB41L5   | 2.048842279 |
| 3834 | 4.4731688 | 2.1832665 | HERC3     | 2.048842278 |
| 3835 | 4.9161868 | 2.3999182 | DPYD      | 2.048480994 |
| 3836 | 8.5254341 | 4.1642117 | TMEM55A   | 2.047310434 |
| 3837 | 22.075249 | 10.785354 | CC2D1A    | 2.04678018  |
| 3838 | 12.961679 | 6.3330551 | LINC00707 | 2.046670849 |
| 3839 | 21.426356 | 10.470018 | POPDC3    | 2.046448772 |
| 3840 | 25.818192 | 12.617493 | COG1      | 2.046222018 |
| 3841 | 168.86346 | 82.530949 | SNX3      | 2.046062218 |
| 3842 | 33.241638 | 16.25101  | NUDT22    | 2.04551218  |
| 3843 | 80.153654 | 39.187217 | MRPL49    | 2.045403064 |
| 3844 | 20.25151  | 9.9037079 | TICAM1    | 2.044841192 |
| 3845 | 20.061885 | 9.8118095 | TMEM185A  | 2.044667137 |
| 3846 | 48.236613 | 23.604703 | TSSC4     | 2.043517079 |
| 3847 | 60.994976 | 29.85894  | VPS29     | 2.042770943 |
| 3848 | 29.434124 | 14.411563 | MIER2     | 2.042396397 |
| 3849 | 24.821939 | 12.161278 | SH3BP5L   | 2.041063379 |
| 3850 | 24.338412 | 11.926416 | ITGAV     | 2.040714685 |
| 3851 | 37.750333 | 18.503687 | PLBD2     | 2.040152006 |
| 3852 | 24.627643 | 12.075146 | ARHGEF40  | 2.039531755 |
| 3853 | 22.558255 | 11.07874  | HCCS      | 2.036175101 |
| 3854 | 81.741163 | 40.153027 | BCL2L1    | 2.035740975 |
| 3855 | 225.08735 | 110.66879 | PLP2      | 2.033882857 |
| 3856 | 20.209483 | 9.9395747 | CDKN1B    | 2.033234197 |
| 3857 | 10.112974 | 4.9775681 | ENTHD2    | 2.031709804 |
| 3858 | 7.7000157 | 3.7923817 | SCML1     | 2.030390513 |
| 3859 | 16.303509 | 8.030128  | WDTC1     | 2.030292596 |
| 3860 | 12.390074 | 6.1029998 | HABP4     | 2.030161245 |
| 3861 | 7.7336478 | 3.8116096 | LINC00674 | 2.028971652 |
| 3862 | 16.959681 | 8.3605978 | ZNF362    | 2.028524873 |
| 3863 | 80.535817 | 39.70265  | UXT       | 2.028474598 |
| 3864 | 102.53522 | 50.547943 | FAM195B   | 2.028474597 |
| 3865 | 7.4376309 | 3.6670707 | HBP1      | 2.028221292 |
| 3866 | 37.243494 | 18.374461 | EXTL3     | 2.026916262 |
| 3867 | 3.8418268 | 1.895672  | ABHD13    | 2.02663053  |
| 3868 | 5.677829  | 2.8016103 | FAM73B    | 2.02663053  |

|      |           |           |           |             |
|------|-----------|-----------|-----------|-------------|
| 3869 | 27.57215  | 13.610591 | KIRREL    | 2.025786453 |
| 3870 | 20.181461 | 9.9653558 | UBQLN2    | 2.025162135 |
| 3871 | 38.418476 | 18.978643 | DUSP14    | 2.024300401 |
| 3872 | 53.418471 | 26.394583 | LIMK1     | 2.023842229 |
| 3873 | 5.1368715 | 2.538386  | FAM13B    | 2.023676259 |
| 3874 | 19.295725 | 9.5361864 | SYNM      | 2.02342158  |
| 3875 | 4.2559462 | 2.1037443 | ACOT13    | 2.023034026 |
| 3876 | 8.33598   | 4.1205338 | FLT3LG    | 2.023034025 |
| 3877 | 11.131131 | 5.5021964 | BBS1      | 2.023034025 |
| 3878 | 54.101384 | 26.74791  | NDUFA8    | 2.022639671 |
| 3879 | 24.334621 | 12.032707 | NQO2      | 2.022372904 |
| 3880 | 72.478845 | 35.842499 | LTBR      | 2.022148187 |
| 3881 | 80.373302 | 39.748205 | CLIC4     | 2.022061166 |
| 3882 | 86.423811 | 42.752574 | RPS6KB2   | 2.021487909 |
| 3883 | 3.9389796 | 1.9490341 | ASB16-AS1 | 2.020990557 |
| 3884 | 30.688389 | 15.193691 | ATXN7L3B  | 2.01981135  |
| 3885 | 14.864273 | 7.3616844 | CDYL      | 2.019140171 |
| 3886 | 14.996819 | 7.4279747 | PKD1P1    | 2.018964704 |
| 3887 | 5.0483778 | 2.5007414 | WNT3      | 2.018752472 |
| 3888 | 78.06002  | 38.673103 | PIEZO1    | 2.018457634 |
| 3889 | 32.818819 | 16.266657 | RNPEPL1   | 2.017551548 |
| 3890 | 17.397341 | 8.6265616 | MKNK1     | 2.01671785  |
| 3891 | 1.6785586 | 0.8324983 | ZKSCAN3   | 2.016290579 |
| 3892 | 4.4195653 | 2.1919287 | ZNF688    | 2.016290578 |
| 3893 | 57.469974 | 28.502823 | VEGFA     | 2.016290578 |
| 3894 | 2.4779209 | 1.2289503 | ZNF189    | 2.016290578 |
| 3895 | 12.055303 | 5.9815508 | C22orf39  | 2.015414312 |
| 3896 | 3.5120845 | 1.7442082 | SFI1      | 2.013569538 |
| 3897 | 359.12448 | 178.36093 | MYL12A    | 2.013470592 |
| 3898 | 0.0201333 | 0.01      | NFASC     | 2.0133272   |
| 3899 | 15.296664 | 7.6004575 | CTDSPL    | 2.012597739 |
| 3900 | 2.8772318 | 1.4299656 | MAP3K5    | 2.012098707 |
| 3901 | 5.1106144 | 2.5399422 | BDH2      | 2.012098706 |
| 3902 | 21.977968 | 10.937238 | CD55      | 2.009462309 |
| 3903 | 23.850165 | 11.868929 | C19orf60  | 2.009462308 |
| 3904 | 26.169323 | 13.023944 | NPEPPS    | 2.009323945 |
| 3905 | 70.670128 | 35.171097 | COA3      | 2.009323944 |
| 3906 | 57.431611 | 28.58374  | NTAN1     | 2.009240611 |
| 3907 | 2.563525  | 1.2760808 | HR        | 2.008904899 |
| 3908 | 1.448438  | 0.721633  | PTK2B     | 2.007167091 |
| 3909 | 52.281869 | 26.049531 | RPS6KA4   | 2.007017649 |
| 3910 | 124.96929 | 62.302797 | NDUFA12   | 2.005837622 |
| 3911 | 25.691863 | 12.813179 | ILVBL     | 2.005112252 |

|      |           |           |          |             |
|------|-----------|-----------|----------|-------------|
| 3912 | 48.86609  | 24.378201 | FASTK    | 2.004499406 |
| 3913 | 20.342952 | 10.150536 | C6orf89  | 2.004125929 |
| 3914 | 21.237548 | 10.597909 | ANKRD54  | 2.00393754  |
| 3915 | 327.98211 | 163.71555 | CD81     | 2.003365639 |
| 3916 | 3.3404263 | 1.6674072 | ACADS    | 2.003365639 |
| 3917 | 14.320057 | 7.1539168 | RNF14    | 2.001708596 |
| 3918 | 35.597943 | 17.785095 | KCTD10   | 2.00156048  |
| 3919 | 58.863064 | 29.41119  | IFNGR2   | 2.001383286 |
| 3920 | 39.822986 | 19.90596  | ASS1     | 2.00055587  |
| 3921 | 18.964781 | 9.4797556 | ETHE1    | 2.000555869 |
| 3922 | 32.186647 | 16.088852 | LDB1     | 2.000555869 |
| 3923 | 32.212142 | 16.102778 | CNIH4    | 2.000408953 |
| 3924 | 11.574644 | 5.7863213 | SLC25A25 | 2.000345794 |
| 3925 | 58.020315 | 29.010675 | MRPL33   | 1.999964339 |
| 3926 | 8.8402777 | 4.4205481 | LRP12    | 1.999814831 |
| 3927 | 3.9167761 | 1.9593115 | MYLIP    | 1.999057326 |
| 3928 | 2.3040738 | 1.1525801 | ZNF226   | 1.999057325 |
| 3929 | 2.6195909 | 1.3125182 | APBA1    | 1.995851139 |
| 3930 | 59.763898 | 29.947674 | MRPL53   | 1.995610675 |
| 3931 | 120.82109 | 60.545952 | PSMA4    | 1.995527063 |
| 3932 | 20.708781 | 10.379157 | MARK4    | 1.995227713 |
| 3933 | 14.93677  | 7.4873418 | ALDH7A1  | 1.99493633  |
| 3934 | 57.562672 | 28.86094  | FBLN1    | 1.994483571 |
| 3935 | 26.296658 | 13.185922 | KDM5C    | 1.994298031 |
| 3936 | 2.4614114 | 1.2343263 | SLC25A45 | 1.994133539 |
| 3937 | 48.94089  | 24.544347 | CD59     | 1.993978051 |
| 3938 | 20.656551 | 10.362117 | CHST12   | 1.993468163 |
| 3939 | 39.146341 | 19.651222 | ABCC1    | 1.992056316 |
| 3940 | 15.870624 | 7.9679756 | HS1BP3   | 1.991801219 |
| 3941 | 17.447853 | 8.7670485 | TMEM18   | 1.990162743 |
| 3942 | 57.703069 | 28.99627  | C11orf24 | 1.990016931 |
| 3943 | 86.234276 | 43.334831 | BAX      | 1.989952966 |
| 3944 | 11.752547 | 5.9068197 | MRPS14   | 1.989657369 |
| 3945 | 83.378728 | 41.920488 | SPHK1    | 1.988973239 |
| 3946 | 25.425327 | 12.792176 | GLA      | 1.98756849  |
| 3947 | 4.5863551 | 2.3079374 | CDC14B   | 1.987209464 |
| 3948 | 15.63707  | 7.8708146 | BACE1    | 1.986715607 |
| 3949 | 4.8744516 | 2.4539629 | LOXL3    | 1.986359139 |
| 3950 | 5.2842979 | 2.6617518 | HAPLN3   | 1.985270724 |
| 3951 | 3.1162542 | 1.5696873 | NR2F1    | 1.985270724 |
| 3952 | 3.9413617 | 1.9853019 | DNAJB9   | 1.985270723 |
| 3953 | 21.624466 | 10.894478 | GSTM3    | 1.98490144  |
| 3954 | 10.978357 | 5.5375317 | TEF      | 1.982536191 |

|      |           |           |          |             |
|------|-----------|-----------|----------|-------------|
| 3955 | 18.234253 | 9.198376  | ZNF512   | 1.982333932 |
| 3956 | 8.4535952 | 4.2655629 | TPGS1    | 1.981824073 |
| 3957 | 21.688636 | 10.943775 | PRADC1   | 1.981824072 |
| 3958 | 1.2829734 | 0.64737   | ZNF25    | 1.981824072 |
| 3959 | 156.37149 | 78.951157 | FIBP     | 1.980610463 |
| 3960 | 24.94143  | 12.59674  | ATL3     | 1.979990748 |
| 3961 | 19.487029 | 9.8433136 | CCDC130  | 1.979722456 |
| 3962 | 4.6589144 | 2.3537453 | CCDC57   | 1.97936218  |
| 3963 | 115.1228  | 58.168784 | NCLN     | 1.979116445 |
| 3964 | 70.22298  | 35.493491 | USP5     | 1.978474854 |
| 3965 | 24.032122 | 12.148089 | FOSL2    | 1.978263483 |
| 3966 | 709.95136 | 358.95632 | FLNA     | 1.977821073 |
| 3967 | 32.53584  | 16.452885 | IGFBP6   | 1.97751576  |
| 3968 | 56.233214 | 28.436917 | GPAA1    | 1.977472242 |
| 3969 | 19.577149 | 9.9003424 | SLC15A4  | 1.977421417 |
| 3970 | 14.309989 | 7.2379061 | SNX4     | 1.977089663 |
| 3971 | 6.2208806 | 3.1470158 | UBL3     | 1.976755469 |
| 3972 | 15.390603 | 7.7884527 | AP1S2    | 1.976079656 |
| 3973 | 93.087103 | 47.133858 | HDAC1    | 1.974951917 |
| 3974 | 2.37117   | 1.2012062 | ADAMTS7  | 1.973990776 |
| 3975 | 3.0561379 | 1.5482027 | RWDD2A   | 1.973990776 |
| 3976 | 1.6137129 | 0.8174876 | PGBD2    | 1.973990776 |
| 3977 | 18.593664 | 9.4242762 | RPS6KA2  | 1.972954016 |
| 3978 | 16.523467 | 8.3772944 | MEX3D    | 1.972410951 |
| 3979 | 8.1437345 | 4.1316663 | ABCB8    | 1.97105329  |
| 3980 | 25.768099 | 13.083477 | C11orf31 | 1.969514607 |
| 3981 | 21.338779 | 10.839748 | PI4KA    | 1.968567725 |
| 3982 | 8.8044591 | 4.4753206 | PKD2     | 1.96733594  |
| 3983 | 30.507968 | 15.514336 | MOGS     | 1.96643724  |
| 3984 | 45.242554 | 23.020972 | ADH5     | 1.965275585 |
| 3985 | 43.051321 | 21.911833 | SUPT6H   | 1.96475213  |
| 3986 | 7.6036303 | 3.8703379 | TMEM99   | 1.96459082  |
| 3987 | 1.4785625 | 0.7526059 | GGACT    | 1.96459082  |
| 3988 | 25.213216 | 12.839504 | TMEM138  | 1.963721917 |
| 3989 | 7.9062654 | 4.0274548 | MAP3K10  | 1.963092276 |
| 3990 | 12.945201 | 6.5948289 | TBL1X    | 1.962932004 |
| 3991 | 5.6078411 | 2.8583149 | DOK4     | 1.961939551 |
| 3992 | 41.106323 | 20.956045 | SPC24    | 1.961549658 |
| 3993 | 26.042242 | 13.277746 | RNF185   | 1.961345096 |
| 3994 | 11.193333 | 5.707898  | LACTB    | 1.96102532  |
| 3995 | 14.374182 | 7.3299317 | LIF      | 1.96102532  |
| 3996 | 304.92925 | 155.59349 | NDUFA13  | 1.959781541 |
| 3997 | 68.414615 | 34.9138   | PCOLCE   | 1.959529306 |

|      |           |           |           |             |
|------|-----------|-----------|-----------|-------------|
| 3998 | 53.923318 | 27.522718 | SLC4A2    | 1.959229363 |
| 3999 | 81.307799 | 41.504559 | CSNK1D    | 1.959008841 |
| 4000 | 58.476714 | 29.857193 | PTK7      | 1.95854693  |
| 4001 | 32.456339 | 16.575449 | NCK2      | 1.958097131 |
| 4002 | 17.351036 | 8.8652105 | TBC1D20   | 1.95720514  |
| 4003 | 8.4567913 | 4.3230553 | PHYH      | 1.956207076 |
| 4004 | 3.5480933 | 1.814325  | STK38L    | 1.955599558 |
| 4005 | 7.9242817 | 4.0520983 | RTN2      | 1.955599558 |
| 4006 | 20.384623 | 10.433065 | C4orf3    | 1.953848013 |
| 4007 | 60.367613 | 30.904849 | LRRC20    | 1.953337895 |
| 4008 | 14.162451 | 7.2512602 | DDR2      | 1.953101985 |
| 4009 | 22.249057 | 11.391651 | LEPROT    | 1.953101985 |
| 4010 | 14.603427 | 7.477043  | MOSPD3    | 1.953101984 |
| 4011 | 17.510627 | 8.9688235 | LRP11     | 1.952388393 |
| 4012 | 45.715473 | 23.41736  | PACSIN2   | 1.95220442  |
| 4013 | 88.792693 | 45.48342  | PACS1     | 1.95219913  |
| 4014 | 73.908163 | 37.860259 | OTUB1     | 1.952130413 |
| 4015 | 31.153869 | 15.962282 | SERINC1   | 1.951717788 |
| 4016 | 29.914003 | 15.330351 | NCS1      | 1.95129272  |
| 4017 | 28.747136 | 14.734394 | TEAD3     | 1.951022558 |
| 4018 | 109.06795 | 55.912329 | PYGB      | 1.950695945 |
| 4019 | 106.12938 | 54.43036  | WBP2      | 1.949819461 |
| 4020 | 1.9480304 | 0.999665  | YPEL2     | 1.948683203 |
| 4021 | 2.1412404 | 1.098814  | PCSK5     | 1.948683202 |
| 4022 | 13.436284 | 6.8950579 | RABEP2    | 1.948683202 |
| 4023 | 14.67978  | 7.5373939 | OSBPL5    | 1.94759364  |
| 4024 | 19.931565 | 10.235185 | PCDHGC3   | 1.947357567 |
| 4025 | 19.89123  | 10.216178 | HGSNAT    | 1.947032413 |
| 4026 | 6.6884975 | 3.4354747 | AHDC1     | 1.946891804 |
| 4027 | 29.25587  | 15.032871 | CALCOCO2  | 1.94612662  |
| 4028 | 15.131076 | 7.7763112 | ARFGAP3   | 1.945790908 |
| 4029 | 93.048549 | 47.823415 | ARL6IP1   | 1.945669282 |
| 4030 | 706.84892 | 363.52478 | OAZ1      | 1.944431166 |
| 4031 | 295.32191 | 151.93806 | PSMD8     | 1.943699357 |
| 4032 | 6.1878359 | 3.1843572 | SLC25A30  | 1.943197817 |
| 4033 | 30.433398 | 15.663622 | RAB11FIP5 | 1.942934874 |
| 4034 | 35.174507 | 18.106386 | WBP5      | 1.94265759  |
| 4035 | 5.7412385 | 2.9565158 | TMEM106A  | 1.941893365 |
| 4036 | 11.90653  | 6.1322874 | CACNB3    | 1.94161315  |
| 4037 | 11.575115 | 5.9643114 | CAPN5     | 1.940729393 |
| 4038 | 612.23833 | 315.60789 | TAGLN2    | 1.939870205 |
| 4039 | 39.249698 | 20.238724 | DAP3      | 1.939336561 |
| 4040 | 0.6792683 | 0.3503657 | PCDHGB2   | 1.938740943 |

|      |           |           |         |             |
|------|-----------|-----------|---------|-------------|
| 4041 | 1.3746669 | 0.7090514 | SSR4P1  | 1.938740942 |
| 4042 | 2.6909548 | 1.3879909 | ERMAP   | 1.938740941 |
| 4043 | 4.3720175 | 2.2550808 | CLDN15  | 1.938740941 |
| 4044 | 2.2800821 | 1.1760633 | PEX11A  | 1.938740941 |
| 4045 | 2.7325109 | 1.4094255 | RPSAP52 | 1.93874094  |
| 4046 | 19.718574 | 10.174876 | DMWD    | 1.937966993 |
| 4047 | 10.472127 | 5.4068892 | TSHZ3   | 1.936811846 |
| 4048 | 46.178511 | 23.850265 | PPARD   | 1.936184359 |
| 4049 | 15.547877 | 8.0320273 | APBA3   | 1.935735142 |
| 4050 | 3.0210375 | 1.5616054 | TIGD6   | 1.934571606 |
| 4051 | 5.9727917 | 3.0897137 | ZFYVE1  | 1.933121402 |
| 4052 | 42.597889 | 22.039428 | GLB1    | 1.932803689 |
| 4053 | 34.222264 | 17.710566 | C7orf73 | 1.932307713 |
| 4054 | 8.0485324 | 4.1699555 | SPRED3  | 1.930124315 |
| 4055 | 42.756503 | 22.162826 | MNF1    | 1.929199039 |
| 4056 | 17.953093 | 9.3064823 | TRAF4   | 1.929095464 |
| 4057 | 72.909446 | 37.802463 | NDUFA4  | 1.928695651 |
| 4058 | 54.023437 | 28.023542 | PHPT1   | 1.927787603 |
| 4059 | 23.113741 | 11.994732 | ACP2    | 1.926990996 |
| 4060 | 10.561656 | 5.4809056 | 2-Mar   | 1.926990996 |
| 4061 | 4.3596881 | 2.2631892 | SIPA1L2 | 1.926347164 |
| 4062 | 4.990498  | 2.5919679 | ZNF653  | 1.925370314 |
| 4063 | 369.3085  | 191.82168 | CAPNS1  | 1.925269877 |
| 4064 | 33.802064 | 17.56114  | CNP     | 1.924821775 |
| 4065 | 44.302887 | 23.047298 | KEAP1   | 1.922259474 |
| 4066 | 112.66895 | 58.623735 | ADIPOR1 | 1.921899967 |
| 4067 | 0.2997559 | 0.1561003 | SPRY3   | 1.920276743 |
| 4068 | 0.9613888 | 0.5006511 | ZNF44   | 1.920276743 |
| 4069 | 2.0920413 | 1.0894478 | WASH3P  | 1.920276742 |
| 4070 | 3.0270318 | 1.5763519 | MTERFD3 | 1.920276742 |
| 4071 | 9.2463942 | 4.8151363 | KLHL22  | 1.920276742 |
| 4072 | 8.2096773 | 4.2752574 | FAM193B | 1.920276741 |
| 4073 | 0.5989815 | 0.3119246 | KCNJ3   | 1.920276741 |
| 4074 | 18.109582 | 9.4307148 | MRPS33  | 1.920276741 |
| 4075 | 17.329596 | 9.0245305 | FBXL12  | 1.920276741 |
| 4076 | 3.8869347 | 2.0241534 | C1orf53 | 1.920276741 |
| 4077 | 11.241467 | 5.8540868 | PTPMT1  | 1.920276741 |
| 4078 | 0.3265662 | 0.1700621 | CD84    | 1.920276738 |
| 4079 | 39.359944 | 20.519143 | XRCC1   | 1.91820599  |
| 4080 | 5.2171203 | 2.7198908 | DNAJC18 | 1.918135964 |
| 4081 | 11.01376  | 5.7426317 | TAF6L   | 1.917894264 |
| 4082 | 10.362406 | 5.4085452 | DNAJC30 | 1.915932225 |
| 4083 | 3.0370082 | 1.5860658 | ZNF438  | 1.914805867 |

|      |           |           |           |             |
|------|-----------|-----------|-----------|-------------|
| 4084 | 224.58393 | 117.29582 | PSMB7     | 1.914679686 |
| 4085 | 69.275433 | 36.191499 | DPF2      | 1.914135476 |
| 4086 | 46.626526 | 24.362927 | RALB      | 1.913831057 |
| 4087 | 44.400299 | 23.242413 | LEMD2     | 1.910313654 |
| 4088 | 29.667669 | 15.530679 | RELB      | 1.91026226  |
| 4089 | 17.175783 | 8.9976717 | COMMD10   | 1.908914157 |
| 4090 | 21.58498  | 11.313077 | PIGQ      | 1.907967275 |
| 4091 | 16.076962 | 8.4281003 | TOR1B     | 1.90754281  |
| 4092 | 5.1433715 | 2.6968936 | TBC1D2    | 1.907146644 |
| 4093 | 25.003907 | 13.114749 | CDH13     | 1.906548712 |
| 4094 | 6.4737452 | 3.3968738 | TRIM7     | 1.905795017 |
| 4095 | 5.0758403 | 2.6648637 | FLRT2     | 1.904727942 |
| 4096 | 3.3659356 | 1.7671477 | APBB3     | 1.904727942 |
| 4097 | 19.022053 | 9.9882119 | IGHMBP2   | 1.904450285 |
| 4098 | 9.4162159 | 4.946243  | NBPF3     | 1.903710731 |
| 4099 | 7.5935041 | 3.9892511 | ARID5A    | 1.903491106 |
| 4100 | 15.237039 | 8.0062185 | FKRP      | 1.903150527 |
| 4101 | 2.6755169 | 1.4062786 | BBS10     | 1.902551111 |
| 4102 | 116.60853 | 61.319206 | SNF8      | 1.901664037 |
| 4103 | 15.195103 | 7.9923035 | TUFT1     | 1.901216923 |
| 4104 | 6.1341449 | 3.2264308 | BIVM      | 1.901216923 |
| 4105 | 4.575772  | 2.4079013 | STRA6     | 1.900315445 |
| 4106 | 24.610877 | 12.951778 | GPR107    | 1.900192875 |
| 4107 | 19.173557 | 10.096809 | VEGFC     | 1.898971896 |
| 4108 | 25.864132 | 13.6282   | BNIP3L    | 1.897839234 |
| 4109 | 13.411435 | 7.0711454 | KIAA0141  | 1.896642567 |
| 4110 | 51.535107 | 27.173456 | GRK6      | 1.896523801 |
| 4111 | 0.4540294 | 0.2395102 | ATCAY     | 1.895657812 |
| 4112 | 1.0309847 | 0.5438665 | COL8A2    | 1.89565781  |
| 4113 | 1.3106887 | 0.6914163 | LINC00665 | 1.895657809 |
| 4114 | 2.6109277 | 1.3773201 | CATSPER1  | 1.895657809 |
| 4115 | 2.8162095 | 1.4856107 | HOXA11-AS | 1.895657809 |
| 4116 | 1.167207  | 0.6157266 | KRBA2     | 1.895657809 |
| 4117 | 1.1828661 | 0.6239871 | LRRC46    | 1.895657808 |
| 4118 | 11.870858 | 6.262131  | RHBDD3    | 1.895657808 |
| 4119 | 1.051075  | 0.5544645 | PRKRIP1   | 1.895657808 |
| 4120 | 169.43458 | 89.468767 | PSME2     | 1.893784629 |
| 4121 | 9.7780997 | 5.1634307 | RAB27A    | 1.893721488 |
| 4122 | 32.005592 | 16.904919 | GOLGA2    | 1.893270931 |
| 4123 | 3.5514571 | 1.8776328 | ANKRD50   | 1.891454577 |
| 4124 | 25.421264 | 13.442419 | IKBKG     | 1.891122742 |
| 4125 | 46.783561 | 24.758429 | SCAMP4    | 1.889601394 |
| 4126 | 83.495565 | 44.204848 | COX6C     | 1.888832758 |



|      |           |           |          |             |
|------|-----------|-----------|----------|-------------|
| 4127 | 21.00667  | 11.125441 | TM2D1    | 1.888165091 |
| 4128 | 3.1165316 | 1.650561  | FAM46A   | 1.88816509  |
| 4129 | 6.1070714 | 3.2367783 | TUBGCP6  | 1.886774689 |
| 4130 | 252.81773 | 134.10861 | CALM2    | 1.885171444 |
| 4131 | 15.930139 | 8.450523  | TAX1BP1  | 1.885106837 |
| 4132 | 1.2531539 | 0.6665744 | WDPCP    | 1.879991216 |
| 4133 | 2.2726227 | 1.2088475 | NFKBID   | 1.879991216 |
| 4134 | 9.1170033 | 4.8494925 | GHDC     | 1.879991216 |
| 4135 | 0.3186537 | 0.1694974 | KCNN3    | 1.879991215 |
| 4136 | 76.5361   | 40.725745 | PSENEEN  | 1.879305087 |
| 4137 | 13.806707 | 7.3510064 | LZTR1    | 1.878206413 |
| 4138 | 4.2342655 | 2.2552468 | HINT3    | 1.877517543 |
| 4139 | 50.534923 | 26.9277   | ENG      | 1.876689123 |
| 4140 | 56.196353 | 29.95172  | CDC25B   | 1.876231233 |
| 4141 | 50.85233  | 27.118182 | BCL7C    | 1.875211577 |
| 4142 | 72.9282   | 38.900458 | PRKACA   | 1.874738832 |
| 4143 | 38.683495 | 20.63932  | STAT1    | 1.874262123 |
| 4144 | 1.2717983 | 0.6786123 | ARHGAP42 | 1.874116244 |
| 4145 | 86.89866  | 46.394033 | TMEM179B | 1.873056822 |
| 4146 | 49.260465 | 26.311062 | TRAPPC3  | 1.87223397  |
| 4147 | 45.233399 | 24.16173  | BIN1     | 1.872109265 |
| 4148 | 43.69298  | 23.340612 | VEGFB    | 1.871972295 |
| 4149 | 30.379154 | 16.242215 | DNAJC15  | 1.870382371 |
| 4150 | 14.885679 | 7.9597151 | SMARCA1  | 1.870127064 |
| 4151 | 21.074107 | 11.268994 | PLEKHO2  | 1.870096525 |
| 4152 | 2.3609166 | 1.2625282 | GTF2H5   | 1.869991262 |
| 4153 | 73.281134 | 39.222221 | SPAG7    | 1.868357606 |
| 4154 | 110.45494 | 59.151036 | CORO1B   | 1.867337429 |
| 4155 | 8.8991356 | 4.766707  | ZNF618   | 1.866935721 |
| 4156 | 201.76702 | 108.09987 | SURF4    | 1.866487219 |
| 4157 | 72.701759 | 38.963556 | NDUFB11  | 1.865891281 |
| 4158 | 34.594317 | 18.542402 | CLDND1   | 1.865686934 |
| 4159 | 16.01267  | 8.5832679 | PRMT2    | 1.865568002 |
| 4160 | 12.826114 | 6.8753202 | PC       | 1.865529745 |
| 4161 | 85.695141 | 45.936831 | SSBP3    | 1.865499617 |
| 4162 | 12.425865 | 6.6610362 | LDLRAP1  | 1.865455201 |
| 4163 | 181.77972 | 97.467279 | LAMP1    | 1.865033289 |
| 4164 | 160.27746 | 85.94871  | UBL5     | 1.864803513 |
| 4165 | 42.33585  | 22.727241 | FAM129A  | 1.862780029 |
| 4166 | 33.459844 | 17.963493 | GTF2A2   | 1.862657963 |
| 4167 | 8.2971306 | 4.4549857 | TMEM120B | 1.86243708  |
| 4168 | 0.3709643 | 0.1993155 | ZNF829   | 1.861191306 |
| 4169 | 1.1908543 | 0.6398344 | QPRT     | 1.861191305 |

|      |           |           |          |             |
|------|-----------|-----------|----------|-------------|
| 4170 | 0.7520431 | 0.4040655 | PTGER2   | 1.861191305 |
| 4171 | 18.194079 | 9.7755019 | PSKH1    | 1.861191304 |
| 4172 | 1.3883016 | 0.745921  | C8orf76  | 1.861191304 |
| 4173 | 1.3872748 | 0.7453693 | ICAM2    | 1.861191303 |
| 4174 | 1.5424305 | 0.8287329 | TLL7     | 1.861191303 |
| 4175 | 4.117663  | 2.2123803 | LRRC23   | 1.861191303 |
| 4176 | 10.470557 | 5.6257287 | WWP1     | 1.861191303 |
| 4177 | 17.260081 | 9.2736739 | SEL1L3   | 1.861191303 |
| 4178 | 1.9743111 | 1.0607781 | C2orf76  | 1.861191303 |
| 4179 | 3.2449749 | 1.7434935 | C16orf95 | 1.861191303 |
| 4180 | 31.301941 | 16.822744 | TAOK2    | 1.860691789 |
| 4181 | 19.216058 | 10.339143 | FAM3A    | 1.858573594 |
| 4182 | 5.2464848 | 2.8237877 | NBPF1    | 1.857960068 |
| 4183 | 18.930444 | 10.188833 | GSTM1    | 1.857960068 |
| 4184 | 10.584737 | 5.6978069 | MVK      | 1.857686235 |
| 4185 | 2.9993734 | 1.615614  | CCNG2    | 1.856491326 |
| 4186 | 7.5116051 | 4.0461299 | SLITRK4  | 1.856491325 |
| 4187 | 6.4466234 | 3.4770301 | DND1     | 1.854060302 |
| 4188 | 9.0477352 | 4.8855665 | PLA2G15  | 1.851931645 |
| 4189 | 4.2916917 | 2.3194483 | FICD     | 1.850307144 |
| 4190 | 34.73325  | 18.775928 | TMED1    | 1.849881981 |
| 4191 | 16.95551  | 9.1717936 | TSPAN9   | 1.848658028 |
| 4192 | 7.194965  | 3.8931312 | MTMR3    | 1.848117801 |
| 4193 | 5.9260521 | 3.2067532 | CRLF3    | 1.847991365 |
| 4194 | 63.701062 | 34.47529  | ZC3H7B   | 1.847731011 |
| 4195 | 63.724207 | 34.500509 | NOSIP    | 1.847051198 |
| 4196 | 13.424108 | 7.2686632 | SLC31A1  | 1.846846861 |
| 4197 | 4.4797829 | 2.4261994 | ATG4A    | 1.846419944 |
| 4198 | 5.1441425 | 2.7860089 | VPS8     | 1.846419944 |
| 4199 | 3.9923276 | 2.1621991 | CHAC2    | 1.846419944 |
| 4200 | 76.785601 | 41.591233 | UBALD2   | 1.846196811 |
| 4201 | 18.488845 | 10.015067 | NNT      | 1.846102963 |
| 4202 | 244.15432 | 132.29047 | DUSP1    | 1.845592571 |
| 4203 | 28.153178 | 15.26233  | PGRMC2   | 1.844618558 |
| 4204 | 17.987534 | 9.7534892 | VPS16    | 1.844215263 |
| 4205 | 6.6523707 | 3.6076584 | SIX5     | 1.84395805  |
| 4206 | 53.133918 | 28.821855 | HDAC3    | 1.843528752 |
| 4207 | 4.838267  | 2.6249153 | SYT11    | 1.843208779 |
| 4208 | 6.7794601 | 3.678075  | NMNAT1   | 1.843208779 |
| 4209 | 14.824117 | 8.0435762 | ERLIN2   | 1.842975845 |
| 4210 | 24.757493 | 13.44393  | FYN      | 1.841536849 |
| 4211 | 44.110602 | 23.954572 | IQGAP1   | 1.841427293 |
| 4212 | 7.0309157 | 3.8200881 | RTKN     | 1.8405114   |

|      |           |           |              |             |
|------|-----------|-----------|--------------|-------------|
| 4213 | 19.838574 | 10.780891 | UCK1         | 1.840160893 |
| 4214 | 32.478601 | 17.650945 | SEZ6L2       | 1.84004891  |
| 4215 | 63.865194 | 34.721265 | NFIC         | 1.83936829  |
| 4216 | 125.75077 | 68.399309 | LOXL2        | 1.838480195 |
| 4217 | 0.8329733 | 0.4531428 | ZNF708       | 1.838213633 |
| 4218 | 4.5120325 | 2.4545746 | EXO5         | 1.838213633 |
| 4219 | 1.3076047 | 0.7113453 | HSPA1L       | 1.838213633 |
| 4220 | 24.63987  | 13.422726 | KLF13        | 1.835683053 |
| 4221 | 7.7512055 | 4.2226362 | DAK          | 1.835631872 |
| 4222 | 14.989551 | 8.1679348 | NAGA         | 1.835170233 |
| 4223 | 2.6104322 | 1.4241377 | MEGF9        | 1.832991435 |
| 4224 | 7.4636876 | 4.0728957 | TSHZ1        | 1.832526091 |
| 4225 | 5.5946175 | 3.0544164 | WDR91        | 1.831648584 |
| 4226 | 2.3850058 | 1.3021088 | KALRN        | 1.831648583 |
| 4227 | 41.712702 | 22.787807 | RAB2A        | 1.830483327 |
| 4228 | 101.53577 | 55.50295  | FAM50A       | 1.829376068 |
| 4229 | 1.6545352 | 0.904426  | LPP-AS2      | 1.829376068 |
| 4230 | 1.3714416 | 0.7496773 | RAP1GAP      | 1.829376067 |
| 4231 | 1.5850491 | 0.8664425 | LOC100130581 | 1.829376066 |
| 4232 | 7.2879092 | 3.9856464 | C19orf12     | 1.828538824 |
| 4233 | 59.666762 | 32.631556 | SLC25A1      | 1.828498809 |
| 4234 | 22.089077 | 12.080585 | P4HA1        | 1.828477332 |
| 4235 | 36.145846 | 19.769047 | DERL1        | 1.82840609  |
| 4236 | 104.06026 | 56.929847 | FKBP2        | 1.827868236 |
| 4237 | 182.12416 | 99.652829 | PSMC3        | 1.827586461 |
| 4238 | 42.295522 | 23.153746 | ATXN7L3      | 1.826724797 |
| 4239 | 9.0901236 | 4.9770643 | MAP3K6       | 1.826402681 |
| 4240 | 2.6407876 | 1.4462212 | ATP10D       | 1.825991468 |
| 4241 | 8.0444252 | 4.4057697 | AFF1         | 1.825884151 |
| 4242 | 92.038738 | 50.429268 | PIN1         | 1.825105566 |
| 4243 | 7.8871446 | 4.3250611 | C7orf43      | 1.823591479 |
| 4244 | 58.418984 | 32.052904 | PPP2CB       | 1.822580092 |
| 4245 | 56.820035 | 31.179624 | CDCA3        | 1.822345076 |
| 4246 | 102.31093 | 56.171568 | PFDN1        | 1.821400704 |
| 4247 | 12.966592 | 7.12033   | TBC1D22A     | 1.821066118 |
| 4248 | 75.221913 | 41.422807 | VDAC3        | 1.815954015 |
| 4249 | 14.182197 | 7.8104553 | LOC375295    | 1.815796393 |
| 4250 | 2.9901127 | 1.6472309 | IKZF4        | 1.815235963 |
| 4251 | 26.594915 | 14.652276 | SPAG5        | 1.815070655 |
| 4252 | 50.891875 | 28.038818 | SERPINE2     | 1.815050659 |
| 4253 | 14.630496 | 8.0619139 | LOC284412    | 1.81476703  |
| 4254 | 13.487233 | 7.4335671 | NUDT16L1     | 1.814368881 |
| 4255 | 29.2438   | 16.119967 | NEU1         | 1.814135236 |

|      |           |           |           |             |
|------|-----------|-----------|-----------|-------------|
| 4256 | 5.3054863 | 2.9247014 | ASH1L     | 1.814026611 |
| 4257 | 10.761943 | 5.9335997 | HOXC6     | 1.81372923  |
| 4258 | 22.604889 | 12.465417 | SSH1      | 1.813408193 |
| 4259 | 365.95165 | 201.85713 | RAB1B     | 1.812924114 |
| 4260 | 37.866576 | 20.889796 | TMEM101   | 1.812682888 |
| 4261 | 144.17514 | 79.542202 | ITGA5     | 1.812561602 |
| 4262 | 306.78227 | 169.26106 | NDUFS8    | 1.81247997  |
| 4263 | 4.842422  | 2.6742595 | HECTD4    | 1.810752514 |
| 4264 | 0.3074387 | 0.1699033 | ITGAM     | 1.809491553 |
| 4265 | 0.4355917 | 0.240726  | GPR82     | 1.80949155  |
| 4266 | 0.3965198 | 0.2191333 | ADAMTS8   | 1.809491546 |
| 4267 | 1.460988  | 0.8074025 | ZGLP1     | 1.809491545 |
| 4268 | 18.980624 | 10.489479 | C19orf47  | 1.809491545 |
| 4269 | 2.0929649 | 1.1566591 | LINC00704 | 1.809491545 |
| 4270 | 1.3671945 | 0.7555683 | NHLRC1    | 1.809491545 |
| 4271 | 0.8900528 | 0.49188   | TSPAN1    | 1.809491545 |
| 4272 | 5.3047146 | 2.9316051 | KATNBL1   | 1.809491545 |
| 4273 | 1.1550249 | 0.6383146 | PROCA1    | 1.809491544 |
| 4274 | 3.0031837 | 1.6596838 | ZNF34     | 1.809491544 |
| 4275 | 2.4851729 | 1.3734095 | LOC730183 | 1.809491544 |
| 4276 | 0.7508926 | 0.4149743 | LOC440300 | 1.809491544 |
| 4277 | 0.4683135 | 0.2588094 | ZNF599    | 1.809491543 |
| 4278 | 0.6194465 | 0.3423318 | ZNF613    | 1.809491543 |
| 4279 | 0.5398951 | 0.2983684 | ZNF567    | 1.809491542 |
| 4280 | 0.2500937 | 0.1382121 | PRELP     | 1.809491541 |
| 4281 | 16.546939 | 9.1572246 | DOLK      | 1.806981848 |
| 4282 | 40.958616 | 22.671019 | LOC541471 | 1.806650899 |
| 4283 | 39.613128 | 21.931515 | TMEM115   | 1.806219408 |
| 4284 | 66.727441 | 36.958418 | DAPK3     | 1.805473429 |
| 4285 | 18.209665 | 10.090821 | SALL1     | 1.804577118 |
| 4286 | 27.442089 | 15.20872  | TMCO1     | 1.804365506 |
| 4287 | 14.242917 | 7.8959265 | PCSK7     | 1.803830987 |
| 4288 | 5.7632605 | 3.1956333 | CRELD1    | 1.803479945 |
| 4289 | 52.36797  | 29.039484 | OSTC      | 1.803336812 |
| 4290 | 4.9580224 | 2.7512382 | FBXO8     | 1.802105865 |
| 4291 | 5.1212529 | 2.8442275 | LRIG3     | 1.800577793 |
| 4292 | 8.1654564 | 4.535223  | TRAF3IP2  | 1.800453125 |
| 4293 | 39.174963 | 21.766803 | CHST14    | 1.799757281 |
| 4294 | 8.4881819 | 4.7178803 | ZCCHC10   | 1.799151593 |
| 4295 | 2.5952615 | 1.4432131 | SESN1     | 1.798252467 |
| 4296 | 69.773627 | 38.802821 | RTN3      | 1.798158612 |
| 4297 | 17.114935 | 9.5202418 | BIN3      | 1.7977416   |
| 4298 | 186.18207 | 103.56723 | PSMB1     | 1.797692846 |

|      |           |           |           |             |
|------|-----------|-----------|-----------|-------------|
| 4299 | 23.320015 | 12.977104 | TINAGL1   | 1.797012292 |
| 4300 | 8.6887979 | 4.8381669 | MPND      | 1.795886345 |
| 4301 | 8.9264388 | 4.9704921 | KIAA0247  | 1.795886345 |
| 4302 | 82.968847 | 46.212117 | HEXB      | 1.795391611 |
| 4303 | 35.930948 | 20.015786 | COMMD1    | 1.795130501 |
| 4304 | 14.524814 | 8.0924514 | GGT7      | 1.794859538 |
| 4305 | 6.6752392 | 3.724485  | ANKRD13C  | 1.792258292 |
| 4306 | 1.2636164 | 0.7050414 | HAS3      | 1.792258291 |
| 4307 | 13.265777 | 7.4053386 | RAB11FIP3 | 1.791380165 |
| 4308 | 15.291037 | 8.537579  | TBC1D7    | 1.791027346 |
| 4309 | 3.4061613 | 1.9022702 | MMP24     | 1.790577    |
| 4310 | 3.6083022 | 2.016254  | RELL2     | 1.789607022 |
| 4311 | 9.6744231 | 5.4078    | CSRNP2    | 1.788975767 |
| 4312 | 6.1690879 | 3.4492462 | KRT10     | 1.788532183 |
| 4313 | 3.2274817 | 1.8045421 | GPR161    | 1.788532183 |
| 4314 | 6.0879313 | 3.4087121 | ZNF500    | 1.785991655 |
| 4315 | 19.185986 | 10.749219 | CRELD2    | 1.784872611 |
| 4316 | 15.159545 | 8.5000366 | SYAP1     | 1.783468176 |
| 4317 | 20.873258 | 11.704164 | CD99L2    | 1.783404511 |
| 4318 | 19.197066 | 10.767067 | YIPF5     | 1.78294302  |
| 4319 | 5.8473485 | 3.2799594 | MSL3      | 1.782750291 |
| 4320 | 120.574   | 67.662492 | TMEM258   | 1.781991673 |
| 4321 | 7.2366145 | 4.0614176 | LATS2     | 1.781795246 |
| 4322 | 56.141328 | 31.518387 | PSMD11    | 1.781224641 |
| 4323 | 28.227022 | 15.848349 | SLC39A13  | 1.781070212 |
| 4324 | 42.476331 | 23.849115 | TRAM2     | 1.781044309 |
| 4325 | 5.6919687 | 3.1963535 | ZNF524    | 1.780769457 |
| 4326 | 1.7950499 | 1.0080192 | WDR27     | 1.780769457 |
| 4327 | 2.3956926 | 1.3453132 | FAM120C   | 1.780769456 |
| 4328 | 0.7749981 | 0.4352041 | ERVK13-1  | 1.780769454 |
| 4329 | 15.572093 | 8.7511519 | MAP4K2    | 1.779433546 |
| 4330 | 11.477255 | 6.4548398 | AACS      | 1.778085149 |
| 4331 | 36.098685 | 20.303346 | NDEL1     | 1.777967302 |
| 4332 | 86.271618 | 48.525088 | USF2      | 1.777876585 |
| 4333 | 18.304593 | 10.299135 | FOXJ2     | 1.777294186 |
| 4334 | 43.834029 | 24.708991 | SELK      | 1.774011318 |
| 4335 | 0.8750154 | 0.4936441 | NEK8      | 1.772563147 |
| 4336 | 0.7834568 | 0.4419909 | ZNF461    | 1.772563146 |
| 4337 | 12.961959 | 7.3125515 | SSH3      | 1.772563146 |
| 4338 | 4.3548872 | 2.4568305 | MANSC1    | 1.772563146 |
| 4339 | 4.0996623 | 2.3128441 | SLC18B1   | 1.772563146 |
| 4340 | 48.132437 | 27.154145 | FBXW5     | 1.772563146 |
| 4341 | 3.1259925 | 1.7635437 | C1orf192  | 1.772563146 |

|      |           |           |              |             |
|------|-----------|-----------|--------------|-------------|
| 4342 | 2.3659357 | 1.334754  | CXCR7        | 1.772563146 |
| 4343 | 16.646066 | 9.390958  | MKL1         | 1.772563146 |
| 4344 | 1.8490159 | 1.0431312 | FGF13        | 1.772563146 |
| 4345 | 2.1544639 | 1.2154512 | ZSCAN2       | 1.772563145 |
| 4346 | 1.7742419 | 1.0009471 | LOC100131089 | 1.772563145 |
| 4347 | 0.512773  | 0.2892834 | ZNF594       | 1.772563145 |
| 4348 | 0.8579053 | 0.4839914 | CD99P1       | 1.772563145 |
| 4349 | 0.39532   | 0.2230216 | AKD1         | 1.772563144 |
| 4350 | 39.745569 | 22.428343 | DAG1         | 1.772113485 |
| 4351 | 57.174538 | 32.282556 | G6PC3        | 1.771066049 |
| 4352 | 4.1017928 | 2.3173191 | FLJ45340     | 1.770059526 |
| 4353 | 597.38564 | 337.71647 | TPM4         | 1.768896969 |
| 4354 | 19.42058  | 10.981634 | CYTH2        | 1.768459991 |
| 4355 | 2.1906334 | 1.2391875 | TMEM200A     | 1.76779819  |
| 4356 | 63.831186 | 36.119463 | STRN4        | 1.7672241   |
| 4357 | 1.5168435 | 0.8587162 | PLA2R1       | 1.766408413 |
| 4358 | 8.2586021 | 4.6771189 | DGKA         | 1.765745595 |
| 4359 | 10.59402  | 6.0010615 | RAB9A        | 1.765357605 |
| 4360 | 4.1278905 | 2.3382744 | MEX3B        | 1.765357605 |
| 4361 | 9.2445913 | 5.2366678 | CHAC1        | 1.765357605 |
| 4362 | 7.3143668 | 4.1457627 | NCOA1        | 1.764299448 |
| 4363 | 8.5460269 | 4.8461768 | PHF8         | 1.763457513 |
| 4364 | 8.2354129 | 4.6715754 | CDC42BPA     | 1.762877008 |
| 4365 | 92.488272 | 52.468698 | APMAP        | 1.762732378 |
| 4366 | 51.244759 | 29.110462 | ZFAND3       | 1.760355411 |
| 4367 | 7.0618788 | 4.0118529 | ZNF319       | 1.760253679 |
| 4368 | 122.61752 | 69.749416 | MYO1C        | 1.757972029 |
| 4369 | 2.4399391 | 1.3880706 | LOC100507373 | 1.757791786 |
| 4370 | 8.121012  | 4.620008  | C7orf10      | 1.757791786 |
| 4371 | 87.218149 | 49.622632 | TADA3        | 1.757628438 |
| 4372 | 46.764521 | 26.617399 | NSFL1C       | 1.756915519 |
| 4373 | 48.179952 | 27.442646 | GTF3C1       | 1.755659837 |
| 4374 | 6.3240687 | 3.6023082 | USP47        | 1.755560142 |
| 4375 | 290.12479 | 165.32193 | TRMT112      | 1.754908135 |
| 4376 | 234.20401 | 133.46102 | PFDN5        | 1.754849523 |
| 4377 | 754.29326 | 429.90255 | ANXA5        | 1.754568014 |
| 4378 | 45.932132 | 26.187641 | PRKCDBP      | 1.753962175 |
| 4379 | 32.695597 | 18.648074 | GALNT10      | 1.753296155 |
| 4380 | 17.98987  | 10.263106 | TPST1        | 1.752868    |
| 4381 | 9.2457631 | 5.2756535 | RNF135       | 1.752534184 |
| 4382 | 22.222281 | 12.69193  | POLR3GL      | 1.750898486 |
| 4383 | 2.0916008 | 1.1953111 | FAM45A       | 1.749837978 |
| 4384 | 5.4776452 | 3.1303728 | COQ10A       | 1.749837978 |

|      |           |           |              |             |
|------|-----------|-----------|--------------|-------------|
| 4385 | 1.9977294 | 1.1416654 | GK           | 1.749837977 |
| 4386 | 2.271947  | 1.2983756 | HOXA7        | 1.749837977 |
| 4387 | 19.187443 | 10.965268 | SLC44A1      | 1.749837977 |
| 4388 | 20.433003 | 11.682732 | VAV2         | 1.748991828 |
| 4389 | 22.419029 | 12.82063  | ECI1         | 1.7486683   |
| 4390 | 4.5982238 | 2.6295575 | FBXL17       | 1.7486683   |
| 4391 | 11.266909 | 6.4489381 | SMUG1        | 1.747095285 |
| 4392 | 1.9488571 | 1.1159903 | ILDR2        | 1.746302951 |
| 4393 | 29.960669 | 17.162493 | TRIM26       | 1.745706129 |
| 4394 | 0.8350826 | 0.4785939 | SHISA9       | 1.744866846 |
| 4395 | 44.648202 | 25.597175 | ADII         | 1.744262878 |
| 4396 | 8.7837163 | 5.0368168 | ZBTB22       | 1.743902299 |
| 4397 | 394.71992 | 226.38726 | COTL1        | 1.743560669 |
| 4398 | 14.396018 | 8.2571935 | CCDC97       | 1.743451707 |
| 4399 | 5.3377775 | 3.0623723 | LRRC37BP1    | 1.743020427 |
| 4400 | 56.112626 | 32.193617 | SPTAN1       | 1.742973645 |
| 4401 | 23.513311 | 13.495846 | SEC24D       | 1.742262922 |
| 4402 | 30.784394 | 17.669727 | C6orf62      | 1.742211037 |
| 4403 | 1.2712131 | 0.7299674 | WHAMMP2      | 1.741465547 |
| 4404 | 2.6653813 | 1.5305392 | KRBOX4       | 1.741465547 |
| 4405 | 19.772249 | 11.364042 | TXNDC15      | 1.739895717 |
| 4406 | 10.419975 | 5.9893936 | CCDC34       | 1.739737903 |
| 4407 | 36.055277 | 20.731723 | MEN1         | 1.739135605 |
| 4408 | 1.6057438 | 0.9233762 | LOC100132891 | 1.738991874 |
| 4409 | 9.7957369 | 5.634671  | FAM118A      | 1.738475393 |
| 4410 | 115.73681 | 66.592259 | YIF1A        | 1.737991879 |
| 4411 | 2.6080986 | 1.5013993 | LOC388152    | 1.737111884 |
| 4412 | 4.9283666 | 2.8371037 | RAB40B       | 1.737111883 |
| 4413 | 88.953643 | 51.240978 | ACTR1A       | 1.735986446 |
| 4414 | 1.5393331 | 0.8868992 | CTNND1       | 1.735634748 |
| 4415 | 13.491428 | 7.7731952 | AZI1         | 1.735634747 |
| 4416 | 72.119845 | 41.552432 | SDCBP        | 1.735634747 |
| 4417 | 8.9115518 | 5.1395096 | LRFN3        | 1.733930359 |
| 4418 | 27.68785  | 15.97837  | CPSF4        | 1.732833283 |
| 4419 | 13.115092 | 7.5704957 | NCAM1        | 1.732395413 |
| 4420 | 75.746682 | 43.755467 | LRP10        | 1.731136387 |
| 4421 | 18.779031 | 10.8508   | AKR7A2       | 1.730658579 |
| 4422 | 19.997932 | 11.558299 | ADCY7        | 1.730179415 |
| 4423 | 7.2279031 | 4.1824615 | CLEC16A      | 1.728145771 |
| 4424 | 46.175983 | 26.735939 | ACO2         | 1.727112809 |
| 4425 | 13.640883 | 7.9003947 | SOGA1        | 1.726607805 |
| 4426 | 48.225984 | 27.933288 | ETS2         | 1.726470035 |
| 4427 | 108.20659 | 62.679305 | PSMB2        | 1.726352745 |

|      |           |           |              |             |
|------|-----------|-----------|--------------|-------------|
| 4428 | 19.827901 | 11.485631 | TPST2        | 1.726322368 |
| 4429 | 46.826608 | 27.131441 | STX8         | 1.725916748 |
| 4430 | 16.996579 | 9.8478559 | TLE2         | 1.725916748 |
| 4431 | 18.7398   | 10.858586 | WDR55        | 1.725804887 |
| 4432 | 60.421657 | 35.015315 | LITAF        | 1.725577994 |
| 4433 | 55.982535 | 32.44637  | SH3BP4       | 1.725386675 |
| 4434 | 0.3001145 | 0.1741485 | SPN          | 1.723325288 |
| 4435 | 0.3896775 | 0.2261195 | PDE4C        | 1.723325285 |
| 4436 | 0.2663593 | 0.1545612 | NUGGC        | 1.723325284 |
| 4437 | 0.5396155 | 0.3131246 | C5orf27      | 1.723325284 |
| 4438 | 0.5950871 | 0.3453133 | NSUN5P1      | 1.723325283 |
| 4439 | 0.7960256 | 0.4619126 | LOC100131655 | 1.723325283 |
| 4440 | 0.9886124 | 0.5736656 | ZNF684       | 1.723325282 |
| 4441 | 0.7040524 | 0.4085429 | HSPB6        | 1.723325281 |
| 4442 | 1.918081  | 1.1130116 | ZSCAN30      | 1.723325281 |
| 4443 | 1.0956861 | 0.6357976 | MFI2-AS1     | 1.723325281 |
| 4444 | 0.6928175 | 0.4020236 | LOC284648    | 1.723325281 |
| 4445 | 0.2980542 | 0.172953  | TUBB1        | 1.723325281 |
| 4446 | 0.9675    | 0.5614146 | FAM153C      | 1.723325281 |
| 4447 | 1.182744  | 0.686315  | FSCN2        | 1.723325281 |
| 4448 | 10.505933 | 6.0963144 | NUDT2        | 1.723325281 |
| 4449 | 2.5169022 | 1.4604916 | LOC285033    | 1.723325281 |
| 4450 | 5.0338044 | 2.9209833 | SNORA73A     | 1.723325281 |
| 4451 | 1.0276109 | 0.5962954 | RSPH9        | 1.723325281 |
| 4452 | 20.362877 | 11.816038 | BCKDHA       | 1.723325281 |
| 4453 | 0.821117  | 0.4764725 | GNG10        | 1.723325281 |
| 4454 | 1.0461822 | 0.6070718 | IL22RA1      | 1.723325281 |
| 4455 | 19.680677 | 11.420176 | UNK          | 1.72332528  |
| 4456 | 2.4662663 | 1.431109  | FLJ42709     | 1.72332528  |
| 4457 | 1.9362842 | 1.1235744 | ZNF333       | 1.72332528  |
| 4458 | 1.4183269 | 0.8230175 | TBC1D19      | 1.72332528  |
| 4459 | 1.7903737 | 1.0389064 | ARRDC4       | 1.72332528  |
| 4460 | 2.6626853 | 1.5450857 | TIRAP        | 1.72332528  |
| 4461 | 0.8269821 | 0.4798758 | MAP3K14-AS1  | 1.72332528  |
| 4462 | 1.2113433 | 0.7029104 | YPEL1        | 1.72332528  |
| 4463 | 0.5684656 | 0.3298655 | PRPH         | 1.72332528  |
| 4464 | 0.620606  | 0.3601212 | EBLN2        | 1.72332528  |
| 4465 | 1.5988563 | 0.927774  | MFSD8        | 1.72332528  |
| 4466 | 0.9455513 | 0.5486784 | NPIP         | 1.72332528  |
| 4467 | 0.918869  | 0.5331954 | GP6          | 1.72332528  |
| 4468 | 0.4790793 | 0.277997  | A1BG-AS1     | 1.723325279 |
| 4469 | 0.3616791 | 0.2098728 | IGF2-AS      | 1.723325279 |
| 4470 | 0.734836  | 0.4264059 | HSD17B7P2    | 1.723325278 |



|      |           |           |              |             |
|------|-----------|-----------|--------------|-------------|
| 4471 | 0.2221269 | 0.1288944 | BAIAP3       | 1.723325278 |
| 4472 | 0.3232002 | 0.1875445 | OR7D2        | 1.723325277 |
| 4473 | 0.3476802 | 0.2017496 | FAXDC2       | 1.723325276 |
| 4474 | 0.1460403 | 0.0847908 | SLC22A20     | 1.722359143 |
| 4475 | 276.81688 | 160.74546 | PFKP         | 1.722082124 |
| 4476 | 43.699599 | 25.382311 | NOTCH2       | 1.721655623 |
| 4477 | 95.467927 | 55.453807 | RNF181       | 1.721575712 |
| 4478 | 44.822216 | 26.048612 | PAK4         | 1.720714182 |
| 4479 | 23.30358  | 13.551911 | CIC          | 1.719578921 |
| 4480 | 19.161733 | 11.14327  | GMPPB        | 1.719578921 |
| 4481 | 35.034231 | 20.37601  | ABHD17A      | 1.719386251 |
| 4482 | 9.9569424 | 5.7912178 | SLC24A6      | 1.719317548 |
| 4483 | 10.836774 | 6.3029509 | SLC26A6      | 1.719317548 |
| 4484 | 153.87722 | 89.514658 | COPS6        | 1.719016968 |
| 4485 | 41.19525  | 23.976622 | C1orf123     | 1.718142347 |
| 4486 | 104.76691 | 60.997004 | PLEC         | 1.717574639 |
| 4487 | 4.8295922 | 2.8125291 | TRAF5        | 1.717170548 |
| 4488 | 42.298458 | 24.632648 | SEPHS2       | 1.717170547 |
| 4489 | 15.677602 | 9.1308044 | LRIG1        | 1.717001151 |
| 4490 | 5.4929052 | 3.2001881 | FAM149B1     | 1.71643198  |
| 4491 | 31.127633 | 18.137801 | UBE2A        | 1.716174554 |
| 4492 | 5.613545  | 3.272977  | ACOX1        | 1.71511897  |
| 4493 | 25.185365 | 14.687109 | LAYN         | 1.714793968 |
| 4494 | 51.7101   | 30.156785 | MUS81        | 1.714708654 |
| 4495 | 3.0082556 | 1.7556433 | TERT         | 1.713477707 |
| 4496 | 10.22315  | 5.9663163 | TRIM56       | 1.713477707 |
| 4497 | 12.941128 | 7.5551825 | IL17RC       | 1.712880885 |
| 4498 | 26.447346 | 15.441302 | FOXP4        | 1.712766614 |
| 4499 | 6.5048136 | 3.7983104 | HOXA3        | 1.712554498 |
| 4500 | 12.537087 | 7.3206937 | FAM173A      | 1.712554497 |
| 4501 | 11.695062 | 6.8334617 | THRA         | 1.711440278 |
| 4502 | 3.9710901 | 2.3203206 | APOBEC3D     | 1.711440278 |
| 4503 | 90.096979 | 52.648368 | KIAA1191     | 1.711296702 |
| 4504 | 5.4508385 | 3.1874964 | LOC100505687 | 1.710068933 |
| 4505 | 26.375624 | 15.429129 | PPM1F        | 1.709469399 |
| 4506 | 13.459955 | 7.873955  | HIC1         | 1.709427497 |
| 4507 | 3.399871  | 1.9890926 | IL1RAP       | 1.709257319 |
| 4508 | 9.1691252 | 5.3643914 | DHRS7B       | 1.709257319 |
| 4509 | 5.4426732 | 3.1847789 | ZMAT3        | 1.708964237 |
| 4510 | 116.8141  | 68.36869  | EZR          | 1.708590529 |
| 4511 | 16.142744 | 9.4557285 | FLYWCH1      | 1.707192022 |
| 4512 | 3.9592306 | 2.320643  | LOC400657    | 1.706092028 |
| 4513 | 3.4724481 | 2.0353229 | TMLHE        | 1.706092028 |

|      |           |           |           |             |
|------|-----------|-----------|-----------|-------------|
| 4514 | 9.8639383 | 5.7827142 | MCUR1     | 1.70576273  |
| 4515 | 17.433772 | 10.224982 | UHMK1     | 1.705017438 |
| 4516 | 23.858579 | 13.994985 | UBXN4     | 1.704794901 |
| 4517 | 88.098709 | 51.678935 | EPN1      | 1.704731508 |
| 4518 | 9.5223742 | 5.5859703 | GBX2      | 1.704694737 |
| 4519 | 78.8005   | 46.263998 | HARS      | 1.703279095 |
| 4520 | 2.6730124 | 1.5695435 | LINC00338 | 1.703050866 |
| 4521 | 2.3201535 | 1.3623513 | WNT2B     | 1.703050866 |
| 4522 | 1.3051188 | 0.7663416 | KIAA0895  | 1.703050865 |
| 4523 | 0.8440888 | 0.4956334 | ZNF862    | 1.703050865 |
| 4524 | 8.9427271 | 5.254914  | FARS2     | 1.701783715 |
| 4525 | 154.49716 | 90.812745 | CUTA      | 1.701271758 |
| 4526 | 31.942395 | 18.780286 | ECI2      | 1.700847124 |
| 4527 | 19.077689 | 11.218819 | HNRNPUL2  | 1.700507733 |
| 4528 | 12.706589 | 7.4729358 | TM2D2     | 1.700347611 |
| 4529 | 23.953966 | 14.092905 | FLYWCH2   | 1.699718086 |
| 4530 | 20.385641 | 11.998237 | ANAPC16   | 1.699053094 |
| 4531 | 5.406868  | 3.1829327 | ABCB9     | 1.698706348 |
| 4532 | 1.657969  | 0.9760186 | CACFD1    | 1.698706348 |
| 4533 | 11.75954  | 6.9226444 | FAM127C   | 1.698706348 |
| 4534 | 1.9035697 | 1.1205996 | RNF144B   | 1.698706348 |
| 4535 | 1.112625  | 0.6549837 | ZNF468    | 1.698706348 |
| 4536 | 6.976051  | 4.1100561 | HOXD8     | 1.697312824 |
| 4537 | 27.520322 | 16.215518 | MARK2     | 1.697159609 |
| 4538 | 13.593983 | 8.0209047 | MAN2C1    | 1.694819149 |
| 4539 | 35.070876 | 20.693552 | STUB1     | 1.694773146 |
| 4540 | 26.337042 | 15.549246 | GALK1     | 1.693782561 |
| 4541 | 5.0517868 | 2.9828464 | SIDT2     | 1.693612776 |
| 4542 | 2.0782222 | 1.2282694 | SH3YL1    | 1.691992093 |
| 4543 | 59.303694 | 35.059617 | APOA1BP   | 1.691510045 |
| 4544 | 3.1561753 | 1.867007  | PARP9     | 1.690500038 |
| 4545 | 8.1668776 | 4.8319447 | STOML1    | 1.69018441  |
| 4546 | 7.9345429 | 4.695308  | TECPR1    | 1.689887626 |
| 4547 | 54.857116 | 32.462838 | VAMP2     | 1.689843533 |
| 4548 | 35.016209 | 20.729463 | TPRA1     | 1.689200028 |
| 4549 | 26.500628 | 15.691441 | TTC9C     | 1.688858775 |
| 4550 | 9.648125  | 5.7151878 | SMARCD3   | 1.688155377 |
| 4551 | 30.073912 | 17.819779 | MED16     | 1.687670275 |
| 4552 | 61.464114 | 36.458574 | SCAF1     | 1.685861688 |
| 4553 | 2.8353673 | 1.6818505 | PAPPA     | 1.685861687 |
| 4554 | 1.9000369 | 1.1275988 | HECTD2    | 1.685029164 |
| 4555 | 3.0483969 | 1.8091063 | AMIGO3    | 1.685029163 |
| 4556 | 8.8699324 | 5.265894  | TMEM110   | 1.684411484 |

|      |           |           |              |             |
|------|-----------|-----------|--------------|-------------|
| 4557 | 5.4587402 | 3.2410712 | DLG3         | 1.684239552 |
| 4558 | 36.569045 | 21.731375 | COG4         | 1.682776451 |
| 4559 | 109.55095 | 65.122093 | ARL6IP4      | 1.68223938  |
| 4560 | 155.3603  | 92.365533 | DAP          | 1.682015928 |
| 4561 | 26.539808 | 15.784157 | DHX8         | 1.681420715 |
| 4562 | 3.7316715 | 2.2209129 | FKBP7        | 1.680242149 |
| 4563 | 11.677558 | 6.9499258 | TMEM160      | 1.680242149 |
| 4564 | 2.5777293 | 1.5341416 | FGGY         | 1.680242149 |
| 4565 | 6.7937424 | 4.0433115 | S1PR2        | 1.680242149 |
| 4566 | 2.3274858 | 1.3852086 | LOC286437    | 1.680242148 |
| 4567 | 40.541193 | 24.134193 | LRP5         | 1.679823866 |
| 4568 | 19.778522 | 11.779863 | STK38        | 1.679011202 |
| 4569 | 15.810182 | 9.4277491 | ORAOV1       | 1.676983761 |
| 4570 | 94.502527 | 56.410917 | PPP2R4       | 1.675252446 |
| 4571 | 88.890782 | 53.081999 | POMP         | 1.674593718 |
| 4572 | 11.943049 | 7.1378825 | SPSB3        | 1.673192182 |
| 4573 | 58.76063  | 35.12086  | MFSD12       | 1.67309771  |
| 4574 | 23.930142 | 14.305159 | ATP1B1       | 1.672832948 |
| 4575 | 4.9421315 | 2.955354  | ZBTB47       | 1.672263791 |
| 4576 | 2740.9496 | 1639.8957 | CFL1         | 1.671417083 |
| 4577 | 27.322    | 16.356199 | HSPG2        | 1.670437022 |
| 4578 | 1.1390915 | 0.6819682 | LOC100289019 | 1.670299888 |
| 4579 | 0.8481375 | 0.5077756 | RBM47        | 1.670299888 |
| 4580 | 2.4781368 | 1.4836478 | A1BG         | 1.670299888 |
| 4581 | 0.8409665 | 0.5034823 | ZXDA         | 1.670299887 |
| 4582 | 2.7199438 | 1.6284164 | VPS37D       | 1.670299887 |
| 4583 | 20.21427  | 12.10218  | TSSC1        | 1.670299887 |
| 4584 | 17.257572 | 10.335787 | GJC1         | 1.669691178 |
| 4585 | 102.5392  | 61.42793  | NDUFA1       | 1.669260174 |
| 4586 | 30.865507 | 18.495918 | TMEM30A      | 1.668773977 |
| 4587 | 11.88294  | 7.1214326 | PHF2         | 1.668616542 |
| 4588 | 27.574707 | 16.532573 | CAMTA2       | 1.667901754 |
| 4589 | 8.3829244 | 5.0265352 | CYB561D2     | 1.667734143 |
| 4590 | 1.9351859 | 1.1616591 | SGMS2        | 1.665881106 |
| 4591 | 315.46188 | 189.36638 | PTTG1        | 1.665881105 |
| 4592 | 7.5497633 | 4.5319941 | SLC25A14     | 1.665881105 |
| 4593 | 13.210023 | 7.9297514 | SUV39H1      | 1.665881104 |
| 4594 | 61.415747 | 36.872578 | ZNHIT1       | 1.665621176 |
| 4595 | 29.983169 | 18.003879 | NUBP1        | 1.665372749 |
| 4596 | 29.439807 | 17.679636 | AGPAT3       | 1.665181784 |
| 4597 | 96.169589 | 57.757828 | SDF4         | 1.66504858  |
| 4598 | 9.3632055 | 5.6266356 | VPS37A       | 1.664085974 |
| 4599 | 163.17207 | 98.074317 | ERGIC1       | 1.663759473 |

|      |           |           |           |             |
|------|-----------|-----------|-----------|-------------|
| 4600 | 3.1731611 | 1.9076545 | LOC389831 | 1.663383532 |
| 4601 | 68.392927 | 41.134083 | GSK3A     | 1.662682654 |
| 4602 | 59.690717 | 35.916366 | MBOAT7    | 1.66193644  |
| 4603 | 5.0664384 | 3.0488059 | ZSCAN9    | 1.661777949 |
| 4604 | 516.29359 | 310.7591  | ARHGDIA   | 1.661394921 |
| 4605 | 11.541831 | 6.9475301 | GFPT1     | 1.661285571 |
| 4606 | 799.04472 | 481.0693  | FAU       | 1.66097632  |
| 4607 | 0.1260354 | 0.075884  | ECM2      | 1.660895774 |
| 4608 | 5.7929232 | 3.4883281 | RUNX2     | 1.660658907 |
| 4609 | 84.061707 | 50.669808 | DNAJB6    | 1.659009792 |
| 4610 | 23.61861  | 14.242715 | MORN2     | 1.658294138 |
| 4611 | 72.644706 | 43.837023 | TMEM259   | 1.657154193 |
| 4612 | 36.089203 | 21.788956 | TM9SF4    | 1.656307075 |
| 4613 | 72.471706 | 43.763717 | NDUFA6    | 1.655976936 |
| 4614 | 13.372938 | 8.0766948 | FAM134C   | 1.655743897 |
| 4615 | 32.434269 | 19.589922 | PCYT1A    | 1.655660975 |
| 4616 | 50.225069 | 30.346693 | SNAI2     | 1.655042581 |
| 4617 | 0.3252431 | 0.1965937 | ZNF527    | 1.654392273 |
| 4618 | 20.42342  | 12.344968 | RAPGEF1   | 1.65439227  |
| 4619 | 3.3244187 | 2.0094501 | ZNF784    | 1.65439227  |
| 4620 | 0.3867307 | 0.23376   | CCDC40    | 1.65439227  |
| 4621 | 4.2512435 | 2.5696708 | APOBEC3F  | 1.65439227  |
| 4622 | 1.8596721 | 1.1240817 | KLC3      | 1.65439227  |
| 4623 | 53.611793 | 32.405732 | FAM127B   | 1.65439227  |
| 4624 | 8.3673576 | 5.0576624 | LINC00467 | 1.65439227  |
| 4625 | 1.0413467 | 0.6294436 | SKAP1     | 1.654392269 |
| 4626 | 2.3674288 | 1.4309961 | SPDYE7P   | 1.654392269 |
| 4627 | 6.7998354 | 4.1101712 | HSF2      | 1.654392269 |
| 4628 | 13.940826 | 8.4265539 | PARP6     | 1.654392269 |
| 4629 | 1.2046214 | 0.7281353 | DLEU2     | 1.654392269 |
| 4630 | 0.7432885 | 0.4492819 | TCP11L2   | 1.654392269 |
| 4631 | 19.221656 | 11.61856  | SPRYD3    | 1.654392269 |
| 4632 | 0.6647512 | 0.4018099 | FAM45B    | 1.654392269 |
| 4633 | 55.743486 | 33.712401 | NDUFAF3   | 1.653500895 |
| 4634 | 43.432437 | 26.28351  | PITHD1    | 1.652459569 |
| 4635 | 78.906199 | 47.753497 | WDR83OS   | 1.652364828 |
| 4636 | 11.450962 | 6.9312324 | REEP3     | 1.652081666 |
| 4637 | 38.451175 | 23.277357 | POLE4     | 1.65187033  |
| 4638 | 3.9587859 | 2.3967852 | SLC35D1   | 1.651706568 |
| 4639 | 10.064579 | 6.0943817 | CHST3     | 1.651451999 |
| 4640 | 20.122215 | 12.188728 | PJA2      | 1.650887202 |
| 4641 | 334.97579 | 202.97199 | TMBIM6    | 1.650354705 |
| 4642 | 15.600856 | 9.4581113 | CCDC28B   | 1.649468483 |

|      |           |           |          |             |
|------|-----------|-----------|----------|-------------|
| 4643 | 5.1042831 | 3.0945018 | CNTNAP1  | 1.649468483 |
| 4644 | 14.799965 | 8.9748753 | ERLEC1   | 1.649044018 |
| 4645 | 16.321554 | 9.8990314 | TRIM37   | 1.648803106 |
| 4646 | 21.743654 | 13.189333 | MKNK2    | 1.648578642 |
| 4647 | 16.955581 | 10.286096 | QTRT1    | 1.648398095 |
| 4648 | 16.235089 | 9.8490095 | WBP1L    | 1.648398095 |
| 4649 | 8.8422417 | 5.3656665 | YBEY     | 1.6479298   |
| 4650 | 114.10136 | 69.283949 | MAP7D1   | 1.646865788 |
| 4651 | 4.5557593 | 2.7665439 | TRMT11   | 1.646733046 |
| 4652 | 61.588856 | 37.400631 | ASF1B    | 1.646733046 |
| 4653 | 16.224222 | 9.8523691 | COQ2     | 1.646733046 |
| 4654 | 5.5213669 | 3.3529217 | CIB2     | 1.646733046 |
| 4655 | 327.39101 | 198.91383 | STIP1    | 1.645893679 |
| 4656 | 47.061524 | 28.593664 | RCN3     | 1.645872459 |
| 4657 | 4.054465  | 2.4647319 | RNF217   | 1.644992313 |
| 4658 | 35.09033  | 21.336407 | NDFIP1   | 1.644622236 |
| 4659 | 4.4770509 | 2.7236196 | DCUN1D3  | 1.643787191 |
| 4660 | 27.039709 | 16.456211 | MUL1     | 1.643130936 |
| 4661 | 16.395934 | 9.9839596 | ROBO1    | 1.642227621 |
| 4662 | 38.715492 | 23.577887 | PGM1     | 1.64202555  |
| 4663 | 9.4478809 | 5.7570009 | ZNF746   | 1.641111598 |
| 4664 | 41.703799 | 25.424614 | RING1    | 1.640292335 |
| 4665 | 13.974311 | 8.5202443 | CHMP4A   | 1.640130267 |
| 4666 | 4.5218759 | 2.7570224 | RGS20    | 1.640130267 |
| 4667 | 13.829715 | 8.4335157 | ZFYVE27  | 1.639851712 |
| 4668 | 14.01005  | 8.5453824 | PTPRJ    | 1.639487834 |
| 4669 | 18.363264 | 11.202162 | DNAJC1   | 1.639260633 |
| 4670 | 7.9799514 | 4.8680187 | ARMCX3   | 1.639260633 |
| 4671 | 47.8547   | 29.195408 | RNPEP    | 1.639117341 |
| 4672 | 10.245894 | 6.2532745 | PTCHD3P1 | 1.638484651 |
| 4673 | 12.982264 | 7.9297514 | TCEAL1   | 1.637159017 |
| 4674 | 11.567603 | 7.0656563 | PRKAG2   | 1.637159017 |
| 4675 | 2.2188795 | 1.3553232 | NHLRC3   | 1.637159016 |
| 4676 | 25.094631 | 15.333963 | ZFAND6   | 1.636539116 |
| 4677 | 14.18682  | 8.6738119 | MGST2    | 1.635592357 |
| 4678 | 791.03221 | 483.65214 | CALR     | 1.63553956  |
| 4679 | 12.836201 | 7.8501426 | IFT27    | 1.63515515  |
| 4680 | 2.9771357 | 1.8207053 | CYP2U1   | 1.63515515  |
| 4681 | 10.528181 | 6.448626  | FAM219B  | 1.632623951 |
| 4682 | 1.5752041 | 0.9648297 | SERAC1   | 1.632623951 |
| 4683 | 4.253051  | 2.6050402 | ZBED6    | 1.63262395  |
| 4684 | 11.383804 | 6.9727041 | RRAGC    | 1.63262395  |
| 4685 | 15.391863 | 9.429139  | BRD1     | 1.632372003 |

|      |           |           |              |             |
|------|-----------|-----------|--------------|-------------|
| 4686 | 8.6975241 | 5.3328263 | PHF21A       | 1.630940833 |
| 4687 | 85.120923 | 52.200577 | ATRAID       | 1.630650991 |
| 4688 | 229.76928 | 140.91269 | ATP6V0C      | 1.630579048 |
| 4689 | 14.585831 | 8.945449  | TTC31        | 1.630530843 |
| 4690 | 160.09663 | 98.245546 | TRAPPC1      | 1.629556111 |
| 4691 | 38.702764 | 23.753853 | C17orf89     | 1.62932572  |
| 4692 | 13.151425 | 8.0716978 | HAGH         | 1.62932572  |
| 4693 | 47.914119 | 29.417343 | TSPAN3       | 1.62877115  |
| 4694 | 343.85918 | 211.22613 | ARF1         | 1.627919649 |
| 4695 | 141.43952 | 86.887208 | THBS1        | 1.627852098 |
| 4696 | 58.135085 | 35.735434 | COX17        | 1.626819065 |
| 4697 | 18.702519 | 11.498563 | APOBEC3B     | 1.626509255 |
| 4698 | 43.586321 | 26.80118  | HMGXB3       | 1.626283663 |
| 4699 | 53.40066  | 32.840911 | DYNLL2       | 1.626040789 |
| 4700 | 30.50304  | 18.767836 | NADK         | 1.625282728 |
| 4701 | 0.5833807 | 0.3590368 | ZNF81        | 1.624849553 |
| 4702 | 0.7563162 | 0.4654685 | DLG5-AS1     | 1.624849551 |
| 4703 | 2.112806  | 1.3003087 | LOC100505695 | 1.624849551 |
| 4704 | 1.5578624 | 0.9587733 | AKAP7        | 1.624849551 |
| 4705 | 1.9951214 | 1.2278807 | RAB42        | 1.624849551 |
| 4706 | 1.2429394 | 0.7649566 | PRX          | 1.624849551 |
| 4707 | 4.2326339 | 2.6049389 | PGAP3        | 1.624849551 |
| 4708 | 3.6855217 | 2.2682234 | WWOX         | 1.624849551 |
| 4709 | 11.54635  | 7.1061039 | NFKBIE       | 1.62484955  |
| 4710 | 1.845233  | 1.1356332 | RAPGEFL1     | 1.62484955  |
| 4711 | 3.2920936 | 2.0260913 | ARRDC3       | 1.62484955  |
| 4712 | 1.9247645 | 1.1845801 | PSCA         | 1.62484955  |
| 4713 | 18.421344 | 11.337261 | MGRN1        | 1.62484955  |
| 4714 | 2.665575  | 1.6405057 | C18orf56     | 1.62484955  |
| 4715 | 1.1678016 | 0.7187137 | SP5          | 1.62484955  |
| 4716 | 11.094788 | 6.8281939 | ZSWIM4       | 1.62484955  |
| 4717 | 0.7321605 | 0.450602  | LOC729603    | 1.624849549 |
| 4718 | 120.18708 | 74.012872 | AHNAK        | 1.623867214 |
| 4719 | 35.448438 | 21.832846 | TIMM17B      | 1.623628777 |
| 4720 | 4.5679384 | 2.8142742 | DYRK2        | 1.623131951 |
| 4721 | 8.8375086 | 5.4486829 | MXD4         | 1.621953206 |
| 4722 | 5.7530562 | 3.5493909 | TIGD2        | 1.620857291 |
| 4723 | 19.945827 | 12.305727 | CASP2        | 1.620857291 |
| 4724 | 1.7477594 | 1.0785707 | NAA38        | 1.620440188 |
| 4725 | 12.34532  | 7.6209168 | MINOS1       | 1.619925764 |
| 4726 | 6.9614616 | 4.2973955 | GALT         | 1.619925764 |
| 4727 | 71.449939 | 44.119261 | PRKAR1A      | 1.619472716 |
| 4728 | 43.407451 | 26.806075 | MIDN         | 1.619313932 |

|      |           |           |           |             |
|------|-----------|-----------|-----------|-------------|
| 4729 | 13.153733 | 8.1232212 | CCDC104   | 1.619275452 |
| 4730 | 78.910395 | 48.731916 | ARF5      | 1.619275452 |
| 4731 | 69.193547 | 42.764573 | SHFM1     | 1.618010958 |
| 4732 | 164.78371 | 101.84539 | FKBP8     | 1.61797915  |
| 4733 | 64.860165 | 40.09401  | UBE2T     | 1.617702118 |
| 4734 | 6.6383131 | 4.1046298 | NOL3      | 1.617274494 |
| 4735 | 210.85357 | 130.44124 | ITM2C     | 1.616464063 |
| 4736 | 27.567583 | 17.060424 | MAN1B1    | 1.615879089 |
| 4737 | 2.9434958 | 1.8219014 | SLC16A13  | 1.615617451 |
| 4738 | 2.679116  | 1.6582613 | RALGPS2   | 1.61561745  |
| 4739 | 21.764961 | 13.471605 | CLN3      | 1.61561745  |
| 4740 | 2.499994  | 1.5473923 | C15orf37  | 1.61561745  |
| 4741 | 63.879665 | 39.555167 | TMEM66    | 1.614951217 |
| 4742 | 13.318405 | 8.2472452 | INHBA     | 1.614891331 |
| 4743 | 8.2801587 | 5.1286729 | TRAPPC9   | 1.614483684 |
| 4744 | 53.05345  | 32.864707 | HSPB11    | 1.614298579 |
| 4745 | 0.0161412 | 0.01      | CMYA5     | 1.6141236   |
| 4746 | 30.821882 | 19.096779 | PNPLA6    | 1.613983263 |
| 4747 | 116.85541 | 72.413932 | GPS1      | 1.613714486 |
| 4748 | 19.797232 | 12.268534 | MAPRE2    | 1.613659126 |
| 4749 | 7.7999813 | 4.8356009 | CMC4      | 1.613032463 |
| 4750 | 16.853459 | 10.448307 | ATG4D     | 1.613032462 |
| 4751 | 16.378281 | 10.159322 | GM2A      | 1.612143004 |
| 4752 | 27.612934 | 17.131567 | DPY30     | 1.611815998 |
| 4753 | 15.478884 | 9.6040266 | ENTPD4    | 1.611707771 |
| 4754 | 25.00794  | 15.525345 | MAML1     | 1.610781589 |
| 4755 | 12.945061 | 8.0371841 | CARD10    | 1.61064632  |
| 4756 | 292.01267 | 181.3318  | EDF1      | 1.61037761  |
| 4757 | 3.8643616 | 2.4025571 | TRAPPC2P1 | 1.608436929 |
| 4758 | 5.110997  | 3.1776173 | MTMR9     | 1.608436929 |
| 4759 | 2.5173365 | 1.5650825 | SUV420H2  | 1.608436929 |
| 4760 | 2.415226  | 1.5015982 | CCDC125   | 1.608436928 |
| 4761 | 5.8690963 | 3.648944  | RCOR3     | 1.608436928 |
| 4762 | 0.8493721 | 0.528073  | TIGD7     | 1.608436928 |
| 4763 | 2.2425773 | 1.3942587 | HERC6     | 1.608436928 |
| 4764 | 2.6563821 | 1.6515302 | SLC22A5   | 1.608436928 |
| 4765 | 0.9134606 | 0.5679182 | USP49     | 1.608436928 |
| 4766 | 8.2683578 | 5.1427401 | GLI2      | 1.607772834 |
| 4767 | 39.061816 | 24.307278 | C11orf58  | 1.607000824 |
| 4768 | 12.687534 | 7.8974383 | SMAD7     | 1.606537948 |
| 4769 | 36.537575 | 22.772289 | TAF7      | 1.604475262 |
| 4770 | 2.7088323 | 1.688298  | FAM76A    | 1.604475261 |
| 4771 | 67.27651  | 41.936185 | NDUFB3    | 1.60425917  |

|      |           |           |           |             |
|------|-----------|-----------|-----------|-------------|
| 4772 | 21.260136 | 13.252544 | OAS3      | 1.60423049  |
| 4773 | 18.567834 | 11.577778 | BLOC1S1   | 1.603747607 |
| 4774 | 1.8030657 | 1.1250229 | ZNF767    | 1.602692511 |
| 4775 | 3.4920997 | 2.1788956 | C21orf67  | 1.602692511 |
| 4776 | 30.846418 | 19.256405 | AKT2      | 1.601878342 |
| 4777 | 90.754621 | 56.656307 | TRAPPC5   | 1.601844974 |
| 4778 | 46.737294 | 29.178057 | SARNP     | 1.601795984 |
| 4779 | 54.406226 | 33.972594 | TRIP6     | 1.601473998 |
| 4780 | 2.7556959 | 1.7212075 | MGC50722  | 1.601024777 |
| 4781 | 7.627234  | 4.7663342 | ROGDI     | 1.600230618 |
| 4782 | 54.005107 | 33.758127 | C6orf106  | 1.599766109 |
| 4783 | 15.985743 | 9.99255   | HTRA1     | 1.599766109 |
| 4784 | 277.32698 | 173.39761 | GPX4      | 1.599370204 |
| 4785 | 90.171086 | 56.411975 | TNFRSF1A  | 1.598438734 |
| 4786 | 83.473369 | 52.232806 | GRB2      | 1.598102346 |
| 4787 | 1.0107822 | 0.6325325 | IFIT2     | 1.597992533 |
| 4788 | 5.4616519 | 3.4178206 | OSCAR     | 1.597992533 |
| 4789 | 22.287314 | 13.94707  | R3HDM2    | 1.597992533 |
| 4790 | 7.5165308 | 4.7037333 | ARNTL     | 1.597992533 |
| 4791 | 2.3170644 | 1.4499845 | RHOBTB1   | 1.597992533 |
| 4792 | 132.14621 | 82.706298 | FLNB      | 1.597776883 |
| 4793 | 49.954262 | 31.285674 | DCTN3     | 1.596713627 |
| 4794 | 16.228972 | 10.1717   | RARG      | 1.595502478 |
| 4795 | 24.487786 | 15.352915 | CXCL2     | 1.594992548 |
| 4796 | 184.15013 | 115.45655 | MORF4L1   | 1.594973451 |
| 4797 | 9.9759887 | 6.2552988 | C12orf65  | 1.594806107 |
| 4798 | 43.048816 | 27.000792 | KIF20A    | 1.59435384  |
| 4799 | 34.707426 | 21.778156 | UNC45A    | 1.593680627 |
| 4800 | 4.1965623 | 2.6337658 | HPSE      | 1.593369604 |
| 4801 | 3.7434651 | 2.3494016 | ZBTB46    | 1.593369604 |
| 4802 | 4.4356876 | 2.7846417 | CEP70     | 1.592911476 |
| 4803 | 38.969502 | 24.465346 | ARHGAP1   | 1.592844938 |
| 4804 | 49.002045 | 30.776901 | CMC2      | 1.592169552 |
| 4805 | 153.32546 | 96.308492 | GDI1      | 1.592024307 |
| 4806 | 12.572158 | 7.8997963 | C1orf216  | 1.591453434 |
| 4807 | 20.364514 | 12.797905 | IRF2BP1   | 1.591238074 |
| 4808 | 42.77195  | 26.883714 | SAP30BP   | 1.590998518 |
| 4809 | 1.0905259 | 0.6855369 | RAB36     | 1.590761798 |
| 4810 | 2.7420987 | 1.7237645 | RPL23AP82 | 1.590761798 |
| 4811 | 7.4668398 | 4.6938768 | C11orf95  | 1.590761798 |
| 4812 | 7.0484611 | 4.4308715 | LOC284454 | 1.590761798 |
| 4813 | 6.6316468 | 4.1688497 | TMTC4     | 1.590761798 |
| 4814 | 2.905535  | 1.8265054 | TRAPPC2   | 1.590761797 |



|      |           |           |           |             |
|------|-----------|-----------|-----------|-------------|
| 4815 | 1.6579117 | 1.0422124 | HOXA13    | 1.590761797 |
| 4816 | 34.876776 | 21.931515 | SNRNP27   | 1.590258392 |
| 4817 | 45.010129 | 28.307282 | ZCCHC17   | 1.590054793 |
| 4818 | 8.3073954 | 5.2265944 | NDFIP2    | 1.589447118 |
| 4819 | 19.768181 | 12.438381 | TMEM141   | 1.589288871 |
| 4820 | 365.9602  | 230.53171 | BSG       | 1.587461462 |
| 4821 | 6.6497499 | 4.18908   | SH2D4A    | 1.587401033 |
| 4822 | 17.259203 | 10.873887 | EML2      | 1.587215513 |
| 4823 | 40.419074 | 25.466334 | SBF1      | 1.587157116 |
| 4824 | 13.652545 | 8.6036909 | B4GALT4   | 1.586824269 |
| 4825 | 58.424375 | 36.818942 | RCN1      | 1.586802109 |
| 4826 | 75.80444  | 47.791196 | TNFRSF10B | 1.586159086 |
| 4827 | 49.664891 | 31.314171 | TMBIM1    | 1.586019689 |
| 4828 | 10.15369  | 6.4021647 | IKBKB     | 1.585977551 |
| 4829 | 33.371443 | 21.044823 | ENO2      | 1.585731721 |
| 4830 | 9.586377  | 6.0464354 | CAMK1     | 1.585459258 |
| 4831 | 14.150583 | 8.9310223 | EML1      | 1.584430408 |
| 4832 | 328.55118 | 207.42161 | PSAP      | 1.583977586 |
| 4833 | 31.03041  | 19.604302 | TSC2      | 1.582836807 |
| 4834 | 34.964036 | 22.096608 | PTRHD1    | 1.582325939 |
| 4835 | 47.818455 | 30.221422 | LIMA1     | 1.582270187 |
| 4836 | 15.74574  | 9.9529801 | DEDD2     | 1.582012608 |
| 4837 | 17.674908 | 11.175018 | ATG12     | 1.581644784 |
| 4838 | 16.888479 | 10.679418 | C7orf49   | 1.581404376 |
| 4839 | 2.4617842 | 1.5567076 | RSPH3     | 1.581404375 |
| 4840 | 5.092469  | 3.2202194 | PCSK1N    | 1.581404375 |
| 4841 | 4.6133563 | 2.9172528 | ETFDH     | 1.581404375 |
| 4842 | 3.6178858 | 2.2877677 | ZNF436    | 1.581404375 |
| 4843 | 8.6694192 | 5.4821014 | RNASET2   | 1.581404375 |
| 4844 | 4.8682722 | 3.0784487 | LOC729013 | 1.581404375 |
| 4845 | 11.770573 | 7.4431138 | L3HYPDH   | 1.581404375 |
| 4846 | 25.188641 | 15.931415 | CHSY1     | 1.581067405 |
| 4847 | 24.106753 | 15.25227  | ZMYM6NB   | 1.580535472 |
| 4848 | 14.074786 | 8.9066447 | PCYT2     | 1.580256767 |
| 4849 | 21.558569 | 13.642447 | RANBP9    | 1.580256767 |
| 4850 | 4.4186478 | 2.7971174 | EXOC6B    | 1.579714841 |
| 4851 | 45.569723 | 28.870663 | GPC1      | 1.578409291 |
| 4852 | 1.3329478 | 0.8445984 | WDR19     | 1.578203152 |
| 4853 | 2.2677619 | 1.4369265 | ZNF302    | 1.578203152 |
| 4854 | 13.321643 | 8.4410193 | ORMDL2    | 1.578203152 |
| 4855 | 62.787029 | 39.79278  | SEC11A    | 1.57784977  |
| 4856 | 195.93316 | 124.20443 | TXN       | 1.57750545  |
| 4857 | 38.539255 | 24.438144 | RSU1      | 1.577012324 |

|      |           |           |           |             |
|------|-----------|-----------|-----------|-------------|
| 4858 | 3.5097652 | 2.2258183 | PRPF40B   | 1.576842632 |
| 4859 | 8.6225127 | 5.4684768 | ITPR2     | 1.576766826 |
| 4860 | 9.8182135 | 6.2281756 | TRMU      | 1.576418863 |
| 4861 | 0.7506511 | 0.4764188 | SAMD12    | 1.575611687 |
| 4862 | 17.33052  | 10.999233 | YIPF1     | 1.575611686 |
| 4863 | 7.5183585 | 4.7717078 | C2orf74   | 1.575611685 |
| 4864 | 7.0944511 | 4.5026647 | TMEM156   | 1.575611685 |
| 4865 | 80.2601   | 50.944586 | AGPAT1    | 1.575439223 |
| 4866 | 18.317037 | 11.631617 | UBTD2     | 1.574762757 |
| 4867 | 44.428439 | 28.22034  | EMC3      | 1.57434103  |
| 4868 | 23.287709 | 14.795519 | METTL23   | 1.573970423 |
| 4869 | 5.825491  | 3.7011439 | ITGBL1    | 1.573970423 |
| 4870 | 28.776768 | 18.291926 | NARF      | 1.573195103 |
| 4871 | 5.0271809 | 3.1959341 | IL6R      | 1.57299265  |
| 4872 | 66.317191 | 42.172174 | PQBP1     | 1.572534319 |
| 4873 | 34.147804 | 21.719718 | GUCD1     | 1.57220291  |
| 4874 | 47.011355 | 29.908329 | GSR       | 1.571848281 |
| 4875 | 9.3254604 | 5.9334623 | OSGIN2    | 1.571672656 |
| 4876 | 65.387835 | 41.605387 | CPSF7     | 1.571619426 |
| 4877 | 4.6824689 | 2.9807987 | RNF103    | 1.570877275 |
| 4878 | 2.7051529 | 1.7220651 | ZNF264    | 1.570877275 |
| 4879 | 43.577136 | 27.75225  | UBE2G2    | 1.570219936 |
| 4880 | 2.928163  | 1.8649047 | HDAC11    | 1.570140811 |
| 4881 | 19.935556 | 12.696668 | BECN1     | 1.570140811 |
| 4882 | 234.56221 | 149.41588 | GABARAP   | 1.569861277 |
| 4883 | 6.927633  | 4.4140319 | LOC339803 | 1.569456952 |
| 4884 | 27.610266 | 17.592241 | ANKLE2    | 1.569456952 |
| 4885 | 6.9556366 | 4.4324882 | TRIM62    | 1.569239726 |
| 4886 | 12.943445 | 8.2482268 | ZNF205    | 1.569239726 |
| 4887 | 129.33565 | 82.431302 | ARPC3     | 1.569011435 |
| 4888 | 11.570445 | 7.3752525 | SMDT1     | 1.568820256 |
| 4889 | 44.752815 | 28.530097 | TMEM184B  | 1.56861767  |
| 4890 | 9.2312572 | 5.8853368 | SLC26A2   | 1.568518095 |
| 4891 | 134.82172 | 85.966327 | NGFRAP1   | 1.568308462 |
| 4892 | 10.287146 | 6.5597347 | CFLAR     | 1.568226006 |
| 4893 | 10.716386 | 6.8358679 | ANKRD39   | 1.567670095 |
| 4894 | 5.2201687 | 3.3298898 | TRIM38    | 1.567670094 |
| 4895 | 34.855292 | 22.236832 | PSMC2     | 1.567457644 |
| 4896 | 14.65191  | 9.3494048 | SPPL3     | 1.567148927 |
| 4897 | 9.781916  | 6.2428449 | ZNF827    | 1.566900371 |
| 4898 | 6.00966   | 3.8362596 | ZFHX4     | 1.566541552 |
| 4899 | 52.477593 | 33.51013  | PLEKHM2   | 1.566021752 |
| 4900 | 82.011663 | 52.369845 | FADD      | 1.56600928  |

|      |           |           |           |             |
|------|-----------|-----------|-----------|-------------|
| 4901 | 32.678028 | 20.870339 | CASP4     | 1.565764112 |
| 4902 | 132.80964 | 84.835408 | ACADVL    | 1.565497695 |
| 4903 | 11.286224 | 7.2096452 | NMT2      | 1.565434026 |
| 4904 | 26.025928 | 16.625375 | RUNX3     | 1.565434026 |
| 4905 | 78.940083 | 50.429033 | COLGALT1  | 1.565369771 |
| 4906 | 5.2412426 | 3.3482799 | MBOAT1    | 1.565353797 |
| 4907 | 180.80654 | 115.52133 | C12orf57  | 1.565135544 |
| 4908 | 18.440198 | 11.787495 | INTS5     | 1.564386473 |
| 4909 | 47.550136 | 30.401072 | PFKL      | 1.564094056 |
| 4910 | 18.602234 | 11.893393 | LDOC1L    | 1.5640813   |
| 4911 | 43.082045 | 27.55836  | CHD3      | 1.563302219 |
| 4912 | 60.496514 | 38.703171 | SPTBN1    | 1.563089339 |
| 4913 | 6.6597677 | 4.2608444 | SLC30A1   | 1.563015952 |
| 4914 | 24.596907 | 15.738899 | CYTH3     | 1.562809841 |
| 4915 | 7.7900881 | 4.9848821 | TMEM38B   | 1.562742698 |
| 4916 | 58.917011 | 37.71336  | TBCB      | 1.562231831 |
| 4917 | 9.0166755 | 5.7725465 | PPAP2A    | 1.561992701 |
| 4918 | 1085.1368 | 694.72775 | UBB       | 1.561959836 |
| 4919 | 51.438862 | 32.932655 | NQO1      | 1.561940937 |
| 4920 | 5.7414605 | 3.676785  | SLC25A26  | 1.561543724 |
| 4921 | 72.049676 | 46.183828 | CIB1      | 1.560062886 |
| 4922 | 23.140807 | 14.83474  | TMEM203   | 1.559906504 |
| 4923 | 46.783561 | 29.992239 | RNF5      | 1.559855568 |
| 4924 | 111.01588 | 71.179911 | KDEL2     | 1.559651826 |
| 4925 | 70.488066 | 45.200069 | DUS1L     | 1.559468123 |
| 4926 | 11.273627 | 7.2337069 | TNFAIP8L1 | 1.558485472 |
| 4927 | 10.010877 | 6.4234649 | CCBL2     | 1.558485471 |
| 4928 | 11.680852 | 7.4960174 | SLC25A20  | 1.558274409 |
| 4929 | 21.038648 | 13.508114 | EPS15L1   | 1.557482261 |
| 4930 | 7.7021324 | 4.9455849 | ZNF213    | 1.557375439 |
| 4931 | 32.700426 | 20.998804 | FAM171A1  | 1.557251803 |
| 4932 | 20.961348 | 13.462613 | GRK5      | 1.557004352 |
| 4933 | 53.889925 | 34.623952 | ANXA7     | 1.556434833 |
| 4934 | 79.147331 | 50.861415 | YIPF3     | 1.556137007 |
| 4935 | 18.419008 | 11.840069 | TWSG1     | 1.555650388 |
| 4936 | 108.0702  | 69.483123 | SERF2     | 1.555344584 |
| 4937 | 28.565225 | 18.372018 | C15orf39  | 1.554822364 |
| 4938 | 7.7728643 | 5.000787  | AHR       | 1.554328221 |
| 4939 | 368.74305 | 237.24019 | TPM2      | 1.554302596 |
| 4940 | 10.579542 | 6.8070492 | TMX3      | 1.554203918 |
| 4941 | 3849.4519 | 2476.8645 | ACTG1     | 1.554163301 |
| 4942 | 60.473069 | 38.91493  | NOL7      | 1.553981178 |
| 4943 | 30.649606 | 19.73256  | IDH1      | 1.553250384 |

|      |           |           |              |             |
|------|-----------|-----------|--------------|-------------|
| 4944 | 47.262596 | 30.446916 | MTCH2        | 1.552295014 |
| 4945 | 62.14156  | 40.038263 | NMT1         | 1.552054349 |
| 4946 | 45.943892 | 29.602152 | TMEM43       | 1.552045701 |
| 4947 | 0.0624636 | 0.0402733 | PLAC4        | 1.550992775 |
| 4948 | 0.0613361 | 0.0395463 | MIAT         | 1.550992766 |
| 4949 | 0.2011578 | 0.1296962 | LOC284950    | 1.550992759 |
| 4950 | 0.1851343 | 0.119365  | FGD5P1       | 1.550992759 |
| 4951 | 0.1531223 | 0.0987254 | ADAMTSL2     | 1.550992758 |
| 4952 | 0.3209438 | 0.206928  | CATSPER2     | 1.550992758 |
| 4953 | 0.4700741 | 0.3030795 | CDNF         | 1.550992756 |
| 4954 | 0.1791913 | 0.1155333 | FLJ43879     | 1.550992756 |
| 4955 | 0.3584854 | 0.2311329 | ANKRD20A12P  | 1.550992755 |
| 4956 | 0.5192679 | 0.3347971 | UTS2B        | 1.550992755 |
| 4957 | 0.5192679 | 0.3347971 | MYZAP        | 1.550992755 |
| 4958 | 0.6859007 | 0.4422333 | MAMSTR       | 1.550992755 |
| 4959 | 0.5184067 | 0.3342419 | EPN2-AS1     | 1.550992754 |
| 4960 | 0.3725855 | 0.2402239 | ZRANB2-AS1   | 1.550992754 |
| 4961 | 0.6558026 | 0.4228277 | FAM46C       | 1.550992754 |
| 4962 | 0.7541598 | 0.4862433 | H2BFXP       | 1.550992754 |
| 4963 | 0.3705978 | 0.2389423 | TMEM37       | 1.550992754 |
| 4964 | 0.4580209 | 0.2953082 | ZNF674       | 1.550992754 |
| 4965 | 0.6281298 | 0.4049856 | SLC25A27     | 1.550992754 |
| 4966 | 0.2085385 | 0.1344549 | CPAMD8       | 1.550992754 |
| 4967 | 0.2936583 | 0.1893357 | STK4-AS1     | 1.550992754 |
| 4968 | 1.3342651 | 0.8602652 | GALNT3       | 1.550992754 |
| 4969 | 0.5552385 | 0.3579891 | PLAC1        | 1.550992754 |
| 4970 | 0.5513214 | 0.3554636 | RPL19P12     | 1.550992754 |
| 4971 | 0.605226  | 0.3902185 | ZNF230       | 1.550992754 |
| 4972 | 0.4510812 | 0.2908338 | GLYATL2      | 1.550992753 |
| 4973 | 0.3479124 | 0.2243159 | RPL21P44     | 1.550992753 |
| 4974 | 1.1319225 | 0.7298051 | HOXA5        | 1.550992753 |
| 4975 | 0.2911963 | 0.1877483 | CARD9        | 1.550992753 |
| 4976 | 2.8993828 | 1.8693723 | CARD6        | 1.550992753 |
| 4977 | 1.0463573 | 0.6746371 | LOC100286793 | 1.550992753 |
| 4978 | 0.9738294 | 0.6278749 | HIGD1B       | 1.550992753 |
| 4979 | 0.1059479 | 0.0683097 | CNR1         | 1.550992753 |
| 4980 | 3.2552449 | 2.0988137 | GSAP         | 1.550992753 |
| 4981 | 10.387514 | 6.6973324 | MITD1        | 1.550992753 |
| 4982 | 2.5209617 | 1.6253859 | FAM211B      | 1.550992753 |
| 4983 | 0.7157396 | 0.4614719 | PBX4         | 1.550992753 |
| 4984 | 1.4754738 | 0.9513093 | RNF150       | 1.550992753 |
| 4985 | 1.7238929 | 1.1114771 | LOC100288332 | 1.550992753 |
| 4986 | 14.229269 | 9.1742975 | NARFL        | 1.550992753 |

|      |           |           |                        |             |
|------|-----------|-----------|------------------------|-------------|
| 4987 | 79.652204 | 51.355626 | MTA2                   | 1.550992753 |
| 4988 | 1.211625  | 0.7811932 | ADAMTS15               | 1.550992753 |
| 4989 | 1.940104  | 1.2508788 | DHRS4                  | 1.550992753 |
| 4990 | 5.1396236 | 3.3137638 | LHPP                   | 1.550992753 |
| 4991 | 7.7185    | 4.9764901 | MIR4737                | 1.550992753 |
| 4992 | 7.7185    | 4.9764901 | HES4                   | 1.550992753 |
| 4993 | 7.1045284 | 4.5806329 | SNORD35B               | 1.550992753 |
| 4994 | 3.2360171 | 2.0864166 | BIK                    | 1.550992753 |
| 4995 | 4.4028063 | 2.8387021 | CA5BP1                 | 1.550992753 |
| 4996 | 0.1953135 | 0.1259281 | TMC1                   | 1.550992753 |
| 4997 | 0.9081907 | 0.5855545 | AMZ2P1                 | 1.550992753 |
| 4998 | 8.33598   | 5.3746093 | SNORD26                | 1.550992753 |
| 4999 | 0.3286482 | 0.2118954 | NR4A3                  | 1.550992753 |
| 5000 | 5.7560768 | 3.711221  | SFT2D3                 | 1.550992752 |
| 5001 | 5.0456225 | 3.2531567 | GLI4                   | 1.550992752 |
| 5002 | 0.65329   | 0.4212076 | TAS2R20                | 1.550992752 |
| 5003 | 2.2162301 | 1.4289107 | GPR39                  | 1.550992752 |
| 5004 | 0.9248499 | 0.5962954 | PRR18                  | 1.550992752 |
| 5005 | 0.4043975 | 0.2607346 | GSTO2                  | 1.550992752 |
| 5006 | 0.5709575 | 0.3681239 | LOC100272228           | 1.550992752 |
| 5007 | 3.8993669 | 2.5141104 | HIST1H2BJ              | 1.550992752 |
| 5008 | 0.3930418 | 0.2534131 | MCF2L2                 | 1.550992752 |
| 5009 | 0.2992812 | 0.1929611 | GRAP                   | 1.550992752 |
| 5010 | 0.5147785 | 0.3319026 | NCF2                   | 1.550992752 |
| 5011 | 0.6218818 | 0.4009573 | CEACAM22P              | 1.550992752 |
| 5012 | 11.83341  | 7.6295715 | EMC2                   | 1.550992752 |
| 5013 | 13.730995 | 8.8530363 | SNX24                  | 1.550992752 |
| 5014 | 0.2776192 | 0.1789945 | SEPP1                  | 1.550992752 |
| 5015 | 1.4096922 | 0.9088967 | SLC41A2                | 1.550992752 |
| 5016 | 0.7016818 | 0.4524082 | DTX2P1-UPK3BP1-PMS2P11 | 1.550992752 |
| 5017 | 0.955961  | 0.6163543 | C6orf99                | 1.550992752 |
| 5018 | 0.3307929 | 0.2132781 | SMPDL3B                | 1.550992752 |
| 5019 | 0.1949481 | 0.1256925 | ZNF682                 | 1.550992752 |
| 5020 | 0.1949481 | 0.1256925 | RASGRF1                | 1.550992752 |
| 5021 | 0.2169322 | 0.1398667 | DHRS9                  | 1.550992752 |
| 5022 | 0.1262007 | 0.0813677 | TEX14                  | 1.550992751 |
| 5023 | 0.5091193 | 0.3282538 | INGX                   | 1.550992751 |
| 5024 | 0.1874939 | 0.1208864 | MBNL1-AS1              | 1.550992751 |
| 5025 | 0.3745947 | 0.2415193 | TRIM46                 | 1.550992751 |
| 5026 | 0.4536999 | 0.2925223 | CH25H                  | 1.550992751 |
| 5027 | 0.4792629 | 0.309004  | LOC151475              | 1.550992751 |
| 5028 | 0.2997116 | 0.1932386 | NODAL                  | 1.55099275  |
| 5029 | 0.2791065 | 0.1799534 | GCNT3                  | 1.55099275  |

|      |           |           |            |             |
|------|-----------|-----------|------------|-------------|
| 5030 | 0.3601374 | 0.232198  | HVCN1      | 1.55099275  |
| 5031 | 0.068201  | 0.0439725 | MACC1      | 1.550992749 |
| 5032 | 0.1285623 | 0.0828903 | GPR12      | 1.550992749 |
| 5033 | 0.1136311 | 0.0732635 | 1-Mar      | 1.550992749 |
| 5034 | 0.1668976 | 0.107607  | AP3B2      | 1.550992749 |
| 5035 | 0.2808619 | 0.1810852 | PHKG1      | 1.550992749 |
| 5036 | 0.2651393 | 0.1709481 | ALOX12     | 1.550992748 |
| 5037 | 0.2065406 | 0.1331667 | AKAP3      | 1.550992748 |
| 5038 | 0.1710062 | 0.1102559 | AXDND1     | 1.550992747 |
| 5039 | 0.2193294 | 0.1414123 | RNF138P1   | 1.550992747 |
| 5040 | 0.1118023 | 0.0720844 | SH3BP5-AS1 | 1.550992745 |
| 5041 | 0.1900299 | 0.1225215 | CLDN16     | 1.550992745 |
| 5042 | 0.0996968 | 0.0642793 | PLXDC1     | 1.550992743 |
| 5043 | 0.1476614 | 0.0952045 | BMS1P1     | 1.550992741 |
| 5044 | 93.351718 | 60.226172 | NGRN       | 1.550019123 |
| 5045 | 38.457763 | 24.829086 | MAPK3      | 1.548899645 |
| 5046 | 31.056996 | 20.05239  | GLG1       | 1.548792762 |
| 5047 | 82.750593 | 53.516968 | RABAC1     | 1.546249656 |
| 5048 | 4.5651588 | 2.9525766 | SLX4       | 1.546161    |
| 5049 | 5.449858  | 3.5261594 | IFT172     | 1.545550673 |
| 5050 | 40.72403  | 26.385146 | NR1H2      | 1.543445343 |
| 5051 | 28.033044 | 18.173568 | TSR2       | 1.542517382 |
| 5052 | 8.8523681 | 5.7399789 | PTPN21     | 1.542230082 |
| 5053 | 125.62109 | 81.462547 | GFPT2      | 1.542071678 |
| 5054 | 15.187205 | 9.8544931 | SGCB       | 1.541145179 |
| 5055 | 102.74703 | 66.671721 | DBI        | 1.541088584 |
| 5056 | 16.999355 | 11.036419 | ETNK2      | 1.540296251 |
| 5057 | 5.3790431 | 3.4929015 | C3orf18    | 1.539992804 |
| 5058 | 23.890595 | 15.521909 | ADPRHL2    | 1.539153114 |
| 5059 | 28.311429 | 18.395615 | TYK2       | 1.539031369 |
| 5060 | 113.5119  | 73.755953 | ASNA1      | 1.539020177 |
| 5061 | 9.0919741 | 5.9081929 | RREB1      | 1.538875622 |
| 5062 | 9.9275677 | 6.451989  | RILPL1     | 1.538683286 |
| 5063 | 3.0346966 | 1.9730577 | SNX29      | 1.538067813 |
| 5064 | 147.66159 | 96.04522  | RAB5C      | 1.537417324 |
| 5065 | 6.5647036 | 4.2710598 | IKBKE      | 1.537019845 |
| 5066 | 112.69902 | 73.331314 | COPG1      | 1.536847187 |
| 5067 | 5.7276818 | 3.7284221 | LYPLAL1    | 1.536221393 |
| 5068 | 4.3306088 | 2.8206442 | MOSPD1     | 1.535326159 |
| 5069 | 15.8319   | 10.31175  | CLEC4GP1   | 1.535326159 |
| 5070 | 20.819769 | 13.564469 | ANO6       | 1.534875321 |
| 5071 | 4.5356134 | 2.9551116 | CYLD       | 1.534836578 |
| 5072 | 2.4492532 | 1.5963166 | RBM43      | 1.534315411 |

|      |           |           |              |             |
|------|-----------|-----------|--------------|-------------|
| 5073 | 39.811982 | 25.949381 | NDUFA11      | 1.53421702  |
| 5074 | 22.199451 | 14.47949  | CDK5         | 1.53316525  |
| 5075 | 4.3027758 | 2.8076317 | KRBA1        | 1.532528553 |
| 5076 | 22.545875 | 14.714776 | GALNT6       | 1.532192841 |
| 5077 | 12.692751 | 8.287483  | SH3GLB1      | 1.531556753 |
| 5078 | 23.324827 | 15.229697 | ALCAM        | 1.531535855 |
| 5079 | 5.521158  | 3.6065964 | SEC14L2      | 1.53084999  |
| 5080 | 2.0259542 | 1.3238823 | LIPE         | 1.530312849 |
| 5081 | 2.0007217 | 1.3073939 | CORO7        | 1.530312849 |
| 5082 | 175.59123 | 114.77705 | TECR         | 1.529846166 |
| 5083 | 8.1459088 | 5.3250065 | TTI2         | 1.529746277 |
| 5084 | 4.5999469 | 3.0081768 | CDAN1        | 1.529147784 |
| 5085 | 54.579098 | 35.703162 | UBE2D2       | 1.528690896 |
| 5086 | 1.0924426 | 0.7147087 | POLR2J4      | 1.528514597 |
| 5087 | 12.695377 | 8.3112514 | LRCH4        | 1.527492863 |
| 5088 | 39.893148 | 26.119199 | DVL3         | 1.527349571 |
| 5089 | 3.3104712 | 2.1688469 | ZNF45        | 1.52637382  |
| 5090 | 6.1542124 | 4.0319169 | ASAP3        | 1.52637382  |
| 5091 | 5.0197238 | 3.2886595 | LINC00623    | 1.52637382  |
| 5092 | 53.560278 | 35.097856 | ACTR3        | 1.526027075 |
| 5093 | 25.216629 | 16.538697 | RFXANK       | 1.52470474  |
| 5094 | 12.666921 | 8.3106168 | CCNJL        | 1.52418547  |
| 5095 | 0.8572331 | 0.5625693 | LOC440297    | 1.523782353 |
| 5096 | 6.4250011 | 4.2164822 | MBTPS2       | 1.523782353 |
| 5097 | 3.3958405 | 2.2285601 | VAMP4        | 1.523782353 |
| 5098 | 22.950749 | 15.067484 | WIBG         | 1.523197183 |
| 5099 | 12.797846 | 8.4041938 | ZDHHC24      | 1.522792885 |
| 5100 | 5.8719689 | 3.8573751 | PTHLH        | 1.522270665 |
| 5101 | 16.193204 | 10.639139 | TMX4         | 1.522040889 |
| 5102 | 75.668866 | 49.720468 | ZMAT2        | 1.52188565  |
| 5103 | 80.112842 | 52.644626 | GIPC1        | 1.521766769 |
| 5104 | 2.005384  | 1.3188273 | ARHGEF26-AS1 | 1.520581131 |
| 5105 | 39.820273 | 26.195356 | GABARAPL2    | 1.520127225 |
| 5106 | 18.963    | 12.47588  | GGA1         | 1.519972898 |
| 5107 | 52.480961 | 34.539025 | GTF3C6       | 1.51946851  |
| 5108 | 18.209665 | 11.985248 | RNASEH1      | 1.519339839 |
| 5109 | 13.454363 | 8.859246  | MGC72080     | 1.518680404 |
| 5110 | 5.1701116 | 3.4043447 | WDR60        | 1.518680403 |
| 5111 | 16.789552 | 11.0567   | MRPL22       | 1.518495762 |
| 5112 | 127.0064  | 83.644075 | MAP2K2       | 1.518414822 |
| 5113 | 6.8474121 | 4.5108328 | HOXC11       | 1.517992907 |
| 5114 | 7.1590617 | 4.7172392 | LYSMD1       | 1.51763807  |
| 5115 | 18.686676 | 12.313795 | SERTAD2      | 1.517539969 |

|      |           |           |              |             |
|------|-----------|-----------|--------------|-------------|
| 5116 | 1.6177802 | 1.066767  | DACT3        | 1.516526248 |
| 5117 | 1.9039821 | 1.2554891 | LOC100287015 | 1.516526247 |
| 5118 | 4.1057812 | 2.7073591 | KLF5         | 1.516526247 |
| 5119 | 0.0151563 | 0.01      | DNAH9        | 1.5156327   |
| 5120 | 4.4541005 | 2.939345  | INVS         | 1.515337747 |
| 5121 | 94.836072 | 62.587789 | DCTN1        | 1.5152488   |
| 5122 | 15.855452 | 10.467633 | LSS          | 1.514712221 |
| 5123 | 15.398036 | 10.174513 | INPP1        | 1.513392928 |
| 5124 | 13.445129 | 8.8921453 | TTC3         | 1.512023085 |
| 5125 | 4.7838408 | 3.1641417 | ATP9A        | 1.511892095 |
| 5126 | 105.6646  | 69.890069 | C19orf10     | 1.511868611 |
| 5127 | 316.91522 | 209.63096 | PPP1CA       | 1.511776753 |
| 5128 | 1.8331438 | 1.2130195 | CEP19        | 1.511223709 |
| 5129 | 1.212367  | 0.8022419 | BCDIN3D      | 1.511223708 |
| 5130 | 0.8801046 | 0.5823788 | FPGT         | 1.511223708 |
| 5131 | 3.4536332 | 2.2853223 | IQCC         | 1.511223707 |
| 5132 | 0.6073923 | 0.4019208 | GOLGA8B      | 1.511223706 |
| 5133 | 22.675136 | 15.01796  | DEDD         | 1.509867945 |
| 5134 | 11.616864 | 7.6942252 | KIAA0907     | 1.509815954 |
| 5135 | 181.90102 | 120.48379 | STMN1        | 1.509755132 |
| 5136 | 138.16084 | 91.532647 | PPP2R1A      | 1.509416024 |
| 5137 | 16.682469 | 11.052419 | CYB561       | 1.509395247 |
| 5138 | 7.9984093 | 5.2990821 | RHOT1        | 1.509395246 |
| 5139 | 4.6254346 | 3.064429  | PPP1R3B      | 1.509395246 |
| 5140 | 15.3083   | 10.142486 | TMEM131      | 1.509324291 |
| 5141 | 9.0462806 | 5.9945903 | RECQL5       | 1.50907403  |
| 5142 | 11.851711 | 7.8551159 | ZDHHC8       | 1.508788868 |
| 5143 | 183.82116 | 121.84756 | TCEB2        | 1.508615902 |
| 5144 | 3.9705947 | 2.6331782 | WASH1        | 1.507909621 |
| 5145 | 1.7903737 | 1.1873216 | GATS         | 1.50790962  |
| 5146 | 0.9655788 | 0.6403426 | GPR155       | 1.50790962  |
| 5147 | 130.25914 | 86.398551 | PRNP         | 1.507654259 |
| 5148 | 4.5400442 | 3.0117256 | EPG5         | 1.507456114 |
| 5149 | 25.616254 | 17.000706 | MED29        | 1.506775854 |
| 5150 | 16.226526 | 10.769732 | ACAA1        | 1.506678674 |
| 5151 | 25.034787 | 16.617149 | SPOP         | 1.506563273 |
| 5152 | 62.261463 | 41.328362 | AP1B1        | 1.506506914 |
| 5153 | 3.1139087 | 2.0676184 | ZNF280D      | 1.506036441 |
| 5154 | 6.2818807 | 4.1722271 | TBC1D9       | 1.505642088 |
| 5155 | 17.679135 | 11.744005 | UNC50        | 1.50537532  |
| 5156 | 0.5329059 | 0.3543274 | GNRHR2       | 1.503992974 |
| 5157 | 0.8530038 | 0.5671595 | DDX12P       | 1.503992973 |
| 5158 | 1.3510502 | 0.8983089 | FAM133B      | 1.503992972 |



|      |           |           |             |             |
|------|-----------|-----------|-------------|-------------|
| 5159 | 4.2314619 | 2.8134852 | FAM24B      | 1.503992972 |
| 5160 | 1.4310695 | 0.9515134 | TTC12       | 1.503992971 |
| 5161 | 0.9709936 | 0.6456105 | CDKL5       | 1.503992971 |
| 5162 | 36.675134 | 24.39318  | COL13A1     | 1.503499536 |
| 5163 | 20.209144 | 13.444055 | DMAP1       | 1.50320306  |
| 5164 | 6.1593979 | 4.0977348 | MDFIC       | 1.503122606 |
| 5165 | 38.960595 | 25.931889 | STK10       | 1.502420264 |
| 5166 | 50.45612  | 33.591308 | PKIG        | 1.502058825 |
| 5167 | 3.347122  | 2.2288072 | LOC150776   | 1.501754887 |
| 5168 | 17.759262 | 11.829982 | CAT         | 1.5012078   |
| 5169 | 24.098924 | 16.061033 | PON2        | 1.500459154 |
| 5170 | 91.01958  | 60.686038 | DAZAP2      | 1.499843829 |
| 5171 | 8.058114  | 5.3746093 | DNLZ        | 1.499292994 |
| 5172 | 50.245787 | 33.531537 | UFC1        | 1.498463586 |
| 5173 | 164.57821 | 109.84785 | MLF2        | 1.498237897 |
| 5174 | 19.676261 | 13.135935 | DSG2        | 1.497895704 |
| 5175 | 9.7573491 | 6.5140377 | ASAP2       | 1.497895703 |
| 5176 | 13.475979 | 8.996921  | ST3GAL5     | 1.497843468 |
| 5177 | 42.397394 | 28.308168 | HSD17B12    | 1.497708879 |
| 5178 | 88.089434 | 58.820524 | CSNK1E      | 1.49759689  |
| 5179 | 27.904985 | 18.645936 | STK11       | 1.496571955 |
| 5180 | 2.3894043 | 1.596585  | MFSD6       | 1.496571954 |
| 5181 | 10.458004 | 6.9879728 | PAQR5       | 1.496571954 |
| 5182 | 63.583751 | 42.488465 | MDH1        | 1.496494432 |
| 5183 | 12.607799 | 8.4277125 | OCEL1       | 1.495993009 |
| 5184 | 46.569721 | 31.180587 | TMEM50A     | 1.493548577 |
| 5185 | 4.1916351 | 2.806494  | NR1H3       | 1.493548577 |
| 5186 | 3.9864531 | 2.6691151 | ITPKC       | 1.493548576 |
| 5187 | 4.9079592 | 3.2861062 | MED31       | 1.493548576 |
| 5188 | 3.2759293 | 2.1933865 | ZNF789      | 1.493548576 |
| 5189 | 0.9689533 | 0.6487592 | IL18BP      | 1.493548576 |
| 5190 | 33.383981 | 22.358331 | MICB        | 1.493133817 |
| 5191 | 13.860299 | 9.287478  | DCP1B       | 1.492364161 |
| 5192 | 30.413194 | 20.388754 | MPC1        | 1.491665162 |
| 5193 | 8.4619833 | 5.6748801 | RNF24       | 1.491129874 |
| 5194 | 5.2353197 | 3.5115711 | FAM181A-AS1 | 1.490876754 |
| 5195 | 12.835888 | 8.6102979 | KIAA0319L   | 1.490760024 |
| 5196 | 8.7784874 | 5.8909321 | VEZT        | 1.490169507 |
| 5197 | 60.415953 | 40.557036 | PSMA2       | 1.489654056 |
| 5198 | 55.460105 | 37.230191 | ACP1        | 1.489654056 |
| 5199 | 2.3415674 | 1.5726268 | ZNF514      | 1.488953043 |
| 5200 | 267.96702 | 180.04941 | GPX1        | 1.48829715  |
| 5201 | 3.7497928 | 2.5201164 | SLC25A42    | 1.487944266 |

|      |           |           |            |             |
|------|-----------|-----------|------------|-------------|
| 5202 | 36.212583 | 24.345883 | SMARCC2    | 1.487421198 |
| 5203 | 12.043013 | 8.0993987 | FBXO42     | 1.486902142 |
| 5204 | 72.356411 | 48.669045 | DCAF7      | 1.486702898 |
| 5205 | 52.649513 | 35.419152 | NUP62      | 1.486470147 |
| 5206 | 36.312034 | 24.430042 | AMZ2       | 1.486368055 |
| 5207 | 4.5422303 | 3.0559257 | B3GALTL    | 1.486368055 |
| 5208 | 21.737816 | 14.624787 | MRPL55     | 1.486368054 |
| 5209 | 44.190107 | 29.73183  | TSPAN14    | 1.486289531 |
| 5210 | 138.87985 | 93.449117 | UBXN1      | 1.486154771 |
| 5211 | 37.772409 | 25.422513 | POLD4      | 1.48578585  |
| 5212 | 19.550881 | 13.159481 | DAGLB      | 1.485687794 |
| 5213 | 16.532827 | 11.130192 | MAU2       | 1.485403507 |
| 5214 | 2.3788251 | 1.6034592 | LOC146880  | 1.483558286 |
| 5215 | 14.982971 | 10.099347 | ERICH1     | 1.483558285 |
| 5216 | 76.66159  | 51.674135 | FBXO7      | 1.483558285 |
| 5217 | 7.641315  | 5.1506672 | C5orf38    | 1.483558285 |
| 5218 | 6.7511618 | 4.5506549 | RAB4A      | 1.483558285 |
| 5219 | 15.09162  | 10.173243 | GOLGA3     | 1.483462019 |
| 5220 | 6.8533416 | 4.6209442 | TMEM65     | 1.483104181 |
| 5221 | 104.84606 | 70.701485 | BABAM1     | 1.482940025 |
| 5222 | 24.314005 | 16.396682 | SLC9A1     | 1.482861288 |
| 5223 | 5.3817064 | 3.6296418 | IL1A       | 1.482710053 |
| 5224 | 71.252564 | 48.071587 | PMP22      | 1.482217845 |
| 5225 | 5.0146494 | 3.3835677 | HDHD3      | 1.482059741 |
| 5226 | 11.968185 | 8.0753728 | CTNNBIP1   | 1.482059741 |
| 5227 | 69.059311 | 46.626153 | MBD3       | 1.481128214 |
| 5228 | 15.415455 | 10.407914 | ZNF580     | 1.481128214 |
| 5229 | 171.17168 | 115.57192 | DDB1       | 1.481083625 |
| 5230 | 10.937842 | 7.3870344 | NUAK1      | 1.480681081 |
| 5231 | 21.807571 | 14.73548  | MYD88      | 1.479936213 |
| 5232 | 55.763846 | 37.682188 | SEC61B     | 1.479846296 |
| 5233 | 20.285956 | 13.709666 | PAPSS1     | 1.479682742 |
| 5234 | 31.523682 | 21.32879  | ZDHHC7     | 1.47798733  |
| 5235 | 32.914999 | 22.273968 | TCEB1      | 1.477733986 |
| 5236 | 65.32136  | 44.216151 | SLC7A1     | 1.477318995 |
| 5237 | 0.2018984 | 0.1366823 | FAM227A    | 1.477135961 |
| 5238 | 1.2872112 | 0.8714237 | RAB30      | 1.477135956 |
| 5239 | 1.9101696 | 1.2931576 | TMEM91     | 1.477135956 |
| 5240 | 1.0165829 | 0.6882122 | ZNF837     | 1.477135955 |
| 5241 | 0.8752604 | 0.5925388 | 4-Sep      | 1.477135955 |
| 5242 | 8.5569037 | 5.7929019 | FIZ1       | 1.477135955 |
| 5243 | 6.9120896 | 4.6793862 | TMEM175    | 1.477135955 |
| 5244 | 0.8409988 | 0.5693442 | ZNF503-AS2 | 1.477135955 |

|      |           |           |          |             |
|------|-----------|-----------|----------|-------------|
| 5245 | 8.7793365 | 5.9434858 | ZNF576   | 1.477135955 |
| 5246 | 3.5333927 | 2.3920565 | KLF4     | 1.477135955 |
| 5247 | 1.1501076 | 0.7786065 | MYCL1    | 1.477135954 |
| 5248 | 18.215087 | 12.339664 | VPS39    | 1.47614125  |
| 5249 | 23.180385 | 15.703621 | PEX19    | 1.47611724  |
| 5250 | 73.6668   | 49.918246 | DCXR     | 1.475748973 |
| 5251 | 13.350821 | 9.0477406 | SNAP29   | 1.475597272 |
| 5252 | 114.23437 | 77.416218 | ANXA11   | 1.475587003 |
| 5253 | 27.528447 | 18.656794 | GDE1     | 1.475518653 |
| 5254 | 21.747524 | 14.739325 | DGCR6L   | 1.475476252 |
| 5255 | 7.6086637 | 5.156751  | SLC12A2  | 1.475476252 |
| 5256 | 60.459183 | 40.986409 | MYL6B    | 1.475103199 |
| 5257 | 40.534135 | 27.493301 | COMMD7   | 1.474327712 |
| 5258 | 61.090917 | 41.45861  | CHMP1A   | 1.473539931 |
| 5259 | 21.18202  | 14.378098 | SLC25A28 | 1.473214355 |
| 5260 | 74.903631 | 50.853988 | POLR2K   | 1.472915567 |
| 5261 | 25.048017 | 17.010983 | EVA1A    | 1.472461474 |
| 5262 | 288.3947  | 195.90318 | RAD23A   | 1.472128714 |
| 5263 | 12.371419 | 8.4037618 | XXYL1    | 1.472128714 |
| 5264 | 89.857032 | 61.056345 | CLSTN1   | 1.471706685 |
| 5265 | 13.869308 | 9.4241289 | CABIN1   | 1.471680623 |
| 5266 | 52.214046 | 35.480666 | ETFA     | 1.47161968  |
| 5267 | 12.422791 | 8.445739  | C5orf24  | 1.470894535 |
| 5268 | 4.3383696 | 2.9497288 | DSTYK    | 1.47076899  |
| 5269 | 21.330553 | 14.509245 | YIF1B    | 1.470135311 |
| 5270 | 14.564074 | 9.9085472 | DGCR8    | 1.469849634 |
| 5271 | 7.3915094 | 5.0304225 | FAM214B  | 1.469361555 |
| 5272 | 9.2851262 | 6.3191569 | FGFR10P2 | 1.469361555 |
| 5273 | 5.4051744 | 3.678587  | RPS2P32  | 1.469361555 |
| 5274 | 1.7366625 | 1.1819164 | OLFML2B  | 1.469361554 |
| 5275 | 10.606615 | 7.2201501 | HRH1     | 1.469029722 |
| 5276 | 36.818437 | 25.06384  | ZNF768   | 1.46898624  |
| 5277 | 31.755669 | 21.620258 | ZBTB7A   | 1.4687923   |
| 5278 | 5.2322842 | 3.565183  | KLHL20   | 1.467606046 |
| 5279 | 13.574453 | 9.2509305 | GAS2L1   | 1.46736079  |
| 5280 | 229.49856 | 156.44122 | SRP14    | 1.466995433 |
| 5281 | 6.2653374 | 4.2713442 | FDXR     | 1.466830355 |
| 5282 | 7.1992555 | 4.9104385 | PIGV     | 1.466112552 |
| 5283 | 18.43182  | 12.575755 | LAMP2    | 1.465663054 |
| 5284 | 15.242548 | 10.400884 | BPNT1    | 1.465504964 |
| 5285 | 4.8815591 | 3.3325169 | LOC81691 | 1.464826489 |
| 5286 | 4.8798781 | 3.3313694 | C9orf9   | 1.464826489 |
| 5287 | 3.0726726 | 2.0976359 | GPR157   | 1.464826489 |

|      |           |           |          |             |
|------|-----------|-----------|----------|-------------|
| 5288 | 16.62539  | 11.349734 | PHF12    | 1.464826488 |
| 5289 | 14.952296 | 10.212689 | BCR      | 1.464090025 |
| 5290 | 49.776449 | 34.010247 | LDLR     | 1.463572109 |
| 5291 | 13.04794  | 8.9221357 | CC2D1B   | 1.462423446 |
| 5292 | 16.452592 | 11.250677 | HARS2    | 1.462364596 |
| 5293 | 12.858497 | 8.7938461 | DOK1     | 1.46221539  |
| 5294 | 90.625104 | 62.00524  | RAB11B   | 1.461571699 |
| 5295 | 46.292431 | 31.678731 | CNPY2    | 1.461309498 |
| 5296 | 7.3606146 | 5.0382899 | USP9X    | 1.460935109 |
| 5297 | 1.504237  | 1.0304702 | GFOD1    | 1.459757885 |
| 5298 | 33.658419 | 23.068215 | PRPSAP1  | 1.459082071 |
| 5299 | 87.983764 | 60.324606 | WDR45B   | 1.458505412 |
| 5300 | 17.907166 | 12.278387 | FAM160B2 | 1.458429867 |
| 5301 | 6.8603756 | 4.7046931 | KIAA0355 | 1.458198315 |
| 5302 | 1.9024021 | 1.3046251 | PLD1     | 1.458198314 |
| 5303 | 37.336089 | 25.606079 | SRA1     | 1.458094749 |
| 5304 | 17.713363 | 12.148824 | TSPYL1   | 1.458031042 |
| 5305 | 13.582688 | 9.3174829 | LRRC45   | 1.45776368  |
| 5306 | 4.938246  | 3.3884798 | KATNAL1  | 1.457363269 |
| 5307 | 2.6498706 | 1.8187254 | RABL2B   | 1.456993192 |
| 5308 | 7.341346  | 5.0386962 | KRTAP2-3 | 1.456993192 |
| 5309 | 8.6814383 | 5.9598651 | ZNRF1    | 1.456650128 |
| 5310 | 15.749562 | 10.812987 | C17orf70 | 1.45654127  |
| 5311 | 3.5984899 | 2.4714326 | PLCE1    | 1.456034013 |
| 5312 | 77.788817 | 53.427748 | DBNL     | 1.455962843 |
| 5313 | 250.54771 | 172.10827 | PARK7    | 1.455756355 |
| 5314 | 14.004446 | 9.6205506 | GPX8     | 1.455680349 |
| 5315 | 19.077256 | 13.109242 | ZNF282   | 1.45525246  |
| 5316 | 3.9546472 | 2.7174991 | ERN1     | 1.455252459 |
| 5317 | 21.397516 | 14.70641  | MAST2    | 1.454978916 |
| 5318 | 8.6992703 | 5.9792352 | WDFY2    | 1.454913556 |
| 5319 | 34.294976 | 23.577495 | DESI1    | 1.45456399  |
| 5320 | 60.610997 | 41.679866 | MED10    | 1.454203251 |
| 5321 | 4.6288142 | 3.1833816 | ZDHHC1   | 1.454055706 |
| 5322 | 3.6180469 | 2.488245  | INSIG2   | 1.454055705 |
| 5323 | 12.243389 | 8.421572  | MAPK7    | 1.453812755 |
| 5324 | 87.819179 | 60.409861 | STK25    | 1.453722589 |
| 5325 | 162.66824 | 111.90506 | TBCA     | 1.45362716  |
| 5326 | 15.675071 | 10.797206 | RARS2    | 1.451770994 |
| 5327 | 11.82064  | 8.1433474 | CBY1     | 1.45157014  |
| 5328 | 51.333283 | 35.366979 | R3HDM4   | 1.451446634 |
| 5329 | 8.6228388 | 5.9448771 | MORN4    | 1.450465445 |
| 5330 | 12.715548 | 8.7695237 | CCDC117  | 1.449970237 |

|      |           |           |          |             |
|------|-----------|-----------|----------|-------------|
| 5331 | 17.886584 | 12.336927 | COMMD9   | 1.449841051 |
| 5332 | 9.8402399 | 6.7871164 | GALNT11  | 1.449841051 |
| 5333 | 189.34583 | 130.65419 | KDELR1   | 1.449213601 |
| 5334 | 25.534591 | 17.620967 | ACAT2    | 1.449102718 |
| 5335 | 19.430843 | 13.412615 | NEK6     | 1.448699113 |
| 5336 | 38.680661 | 26.704226 | PCMT1    | 1.448484611 |
| 5337 | 0.2928722 | 0.2023167 | FDPSP2   | 1.447593241 |
| 5338 | 0.8369458 | 0.5781636 | POU5F1   | 1.447593237 |
| 5339 | 0.8200093 | 0.5664639 | FAM41C   | 1.447593237 |
| 5340 | 0.2846432 | 0.196632  | RFPL1S   | 1.447593237 |
| 5341 | 0.585157  | 0.4042275 | C1QL3    | 1.447593237 |
| 5342 | 0.7179117 | 0.4959347 | DPY19L2  | 1.447593237 |
| 5343 | 1.6101507 | 1.112295  | LURAP1L  | 1.447593237 |
| 5344 | 10.436541 | 7.2095812 | PLEKHA3  | 1.447593236 |
| 5345 | 0.7597898 | 0.5248642 | TMEM200C | 1.447593236 |
| 5346 | 6.9715484 | 4.8159581 | ANAPC10  | 1.447593236 |
| 5347 | 68.997132 | 47.663342 | ICT1     | 1.447593236 |
| 5348 | 1.6024861 | 1.1070003 | ZNF225   | 1.447593236 |
| 5349 | 23.077007 | 15.941638 | CDC26    | 1.447593236 |
| 5350 | 26.908727 | 18.588597 | FUCA2    | 1.447593236 |
| 5351 | 18.309338 | 12.648123 | NUB1     | 1.447593236 |
| 5352 | 1.1976983 | 0.8273721 | DNAJC12  | 1.447593236 |
| 5353 | 110.52343 | 76.349784 | SAE1     | 1.447593235 |
| 5354 | 0.3854152 | 0.2662455 | 14-Sep   | 1.447593235 |
| 5355 | 13.933109 | 9.6250166 | PEX10    | 1.447593235 |
| 5356 | 0.7189731 | 0.4966679 | DENND6B  | 1.447593235 |
| 5357 | 1.0467327 | 0.7230848 | ZNF440   | 1.447593235 |
| 5358 | 1.1277901 | 0.7790794 | PBLD     | 1.447593235 |
| 5359 | 20.731182 | 14.327149 | AFF4     | 1.446985897 |
| 5360 | 47.654194 | 32.955911 | SHKBP1   | 1.445998385 |
| 5361 | 33.226156 | 22.981742 | POLR2J   | 1.445763156 |
| 5362 | 20.070451 | 13.886624 | RAB21    | 1.445308164 |
| 5363 | 14.18682  | 9.817178  | KCTD17   | 1.445101681 |
| 5364 | 39.612882 | 27.42226  | RBFOX2   | 1.444552074 |
| 5365 | 139.86876 | 96.941001 | PRR13    | 1.442823571 |
| 5366 | 57.916648 | 40.147684 | CBR1     | 1.442590033 |
| 5367 | 15.908749 | 11.032197 | BRD8     | 1.442029136 |
| 5368 | 219.36789 | 152.13792 | YWHAQ    | 1.441901519 |
| 5369 | 2.9845508 | 2.0706971 | ARL4A    | 1.441326598 |
| 5370 | 1.5197173 | 1.0543879 | SLC35E2  | 1.441326598 |
| 5371 | 20.250339 | 14.052006 | TMEM185B | 1.441099547 |
| 5372 | 52.792368 | 36.6379   | TOX2     | 1.440922299 |
| 5373 | 39.931736 | 27.71839  | MLLT1    | 1.440622482 |

|      |           |           |           |             |
|------|-----------|-----------|-----------|-------------|
| 5374 | 80.255849 | 55.716212 | UBE2L3    | 1.44043981  |
| 5375 | 8.4486284 | 5.8662575 | LIMK2     | 1.440207556 |
| 5376 | 206.93961 | 143.74844 | CDKN1A    | 1.439595483 |
| 5377 | 2.9864684 | 2.0759519 | ELAC1     | 1.438601973 |
| 5378 | 33.953243 | 23.607101 | GPR176    | 1.438263956 |
| 5379 | 5.5866131 | 3.8852597 | KIAA0556  | 1.437899531 |
| 5380 | 29.58063  | 20.578459 | NBR1      | 1.437456028 |
| 5381 | 9.9107281 | 6.8950579 | PLCXD1    | 1.43736691  |
| 5382 | 14.113131 | 9.8222685 | DEXI      | 1.436850429 |
| 5383 | 7.0476443 | 4.9049255 | C14orf159 | 1.436850429 |
| 5384 | 14.547536 | 10.125849 | MADD      | 1.436673155 |
| 5385 | 13.607386 | 9.4731585 | NDE1      | 1.436414909 |
| 5386 | 115.70608 | 80.569405 | SEC13     | 1.436104401 |
| 5387 | 1.4941174 | 1.0403961 | FLJ38109  | 1.4361044   |
| 5388 | 13.347824 | 9.2988422 | CUL7      | 1.435428587 |
| 5389 | 9.6533828 | 6.7274145 | C9orf37   | 1.434932071 |
| 5390 | 18.619333 | 12.979198 | STAT5B    | 1.434551855 |
| 5391 | 3.528023  | 2.4598359 | C2orf42   | 1.434251362 |
| 5392 | 2.1443356 | 1.4950905 | TRPC1     | 1.434251362 |
| 5393 | 60.044182 | 41.870017 | MED15     | 1.434061578 |
| 5394 | 3.9345    | 2.7446937 | ZNF324    | 1.433493302 |
| 5395 | 2.919699  | 2.036772  | RGAG4     | 1.433493302 |
| 5396 | 68.177914 | 47.582966 | SLC35B1   | 1.432821876 |
| 5397 | 18.833032 | 13.15054  | C9orf69   | 1.432110955 |
| 5398 | 1.0484044 | 0.7322868 | ZNF497    | 1.431685618 |
| 5399 | 0.7180687 | 0.5015548 | ALS2CL    | 1.431685618 |
| 5400 | 32.855777 | 22.956222 | YIPF2     | 1.43123625  |
| 5401 | 23.1555   | 16.181619 | PI4K2A    | 1.430975456 |
| 5402 | 32.601607 | 22.798433 | FHL3      | 1.429993318 |
| 5403 | 9.5798922 | 6.6992566 | C19orf52  | 1.429993318 |
| 5404 | 38.544108 | 26.957288 | COPRS     | 1.429821444 |
| 5405 | 315.36562 | 220.57301 | IFITM3    | 1.429756122 |
| 5406 | 1.6181689 | 1.1321042 | SLC8A1    | 1.429346263 |
| 5407 | 1.8868766 | 1.3200976 | ZNF248    | 1.429346262 |
| 5408 | 120.23175 | 84.124042 | MAP4      | 1.429219786 |
| 5409 | 37.498979 | 26.261664 | MZT2B     | 1.42789809  |
| 5410 | 233.68843 | 163.72932 | AP2S1     | 1.427285171 |
| 5411 | 17.914221 | 12.558912 | VAMP7     | 1.426415021 |
| 5412 | 3.6338187 | 2.5479022 | FRS2      | 1.426200232 |
| 5413 | 7.9678861 | 5.5895068 | ZNF367    | 1.425507902 |
| 5414 | 4.0831251 | 2.8648753 | IQCK      | 1.425236583 |
| 5415 | 10.650902 | 7.4748636 | KLHL36    | 1.424895781 |
| 5416 | 34.125504 | 23.954185 | CARHSP1   | 1.424615566 |

|      |           |           |          |             |
|------|-----------|-----------|----------|-------------|
| 5417 | 86.116624 | 60.451155 | HMGB2    | 1.424565396 |
| 5418 | 102.41091 | 71.940183 | GADD45A  | 1.423556475 |
| 5419 | 18.032936 | 12.668722 | NSMCE2   | 1.42342192  |
| 5420 | 107.71704 | 75.686744 | SSR4     | 1.423195597 |
| 5421 | 16.550688 | 11.632382 | CES2     | 1.422811533 |
| 5422 | 34.866574 | 24.516542 | ZMIZ1    | 1.422165281 |
| 5423 | 0.4736352 | 0.3331369 | THAP2    | 1.42174336  |
| 5424 | 0.5407866 | 0.3803687 | ZNF606   | 1.421743359 |
| 5425 | 0.7084037 | 0.4982641 | VSIG1    | 1.421743358 |
| 5426 | 0.6227641 | 0.4380285 | SFTPB    | 1.421743357 |
| 5427 | 1.5536391 | 1.0927704 | ZNF181   | 1.421743357 |
| 5428 | 2.8637033 | 2.0142196 | CPEB1    | 1.421743357 |
| 5429 | 51.840672 | 36.462749 | PREB     | 1.421743357 |
| 5430 | 2.1304782 | 1.498497  | OVCA2    | 1.421743357 |
| 5431 | 5.8779346 | 4.1343148 | HIST1H4C | 1.421743357 |
| 5432 | 6.5559423 | 4.6111996 | FST      | 1.421743357 |
| 5433 | 1.8561899 | 1.3055731 | AGPHD1   | 1.421743357 |
| 5434 | 2.7355543 | 1.9240845 | ZC2HC1A  | 1.421743356 |
| 5435 | 1.0813182 | 0.7605579 | NUDT13   | 1.421743356 |
| 5436 | 13.734324 | 9.662853  | ARHGEF11 | 1.421352875 |
| 5437 | 63.959114 | 45.025136 | WASF2    | 1.420520176 |
| 5438 | 18.264226 | 12.862829 | DOLPP1   | 1.419922942 |
| 5439 | 39.114983 | 27.552255 | CAST     | 1.419665392 |
| 5440 | 6.5836036 | 4.6378015 | SUOX     | 1.419552689 |
| 5441 | 7.1476785 | 5.0404964 | SLC39A11 | 1.418050517 |
| 5442 | 18.849268 | 13.296142 | MAFK     | 1.417649484 |
| 5443 | 5.0829146 | 3.5856432 | ZNRF2    | 1.417574021 |
| 5444 | 3.0028746 | 2.1183195 | DIXDC1   | 1.417574021 |
| 5445 | 33.999918 | 23.984581 | TSPAN17  | 1.417574021 |
| 5446 | 13.047008 | 9.2077697 | RHPN2    | 1.416956343 |
| 5447 | 20.989162 | 14.81545  | APEX2    | 1.416707666 |
| 5448 | 18.419827 | 13.003087 | MAD2L1BP | 1.416573381 |
| 5449 | 13.900064 | 9.812456  | MFSD5    | 1.41657338  |
| 5450 | 5.3961548 | 3.8096822 | FBF1     | 1.416431738 |
| 5451 | 12.10921  | 8.5490952 | PNKP     | 1.416431737 |
| 5452 | 8.8882945 | 6.2771299 | DENND1A  | 1.415980645 |
| 5453 | 13.790004 | 9.7402305 | HPS6     | 1.415778    |
| 5454 | 6.1328659 | 4.3343623 | COA5     | 1.414940757 |
| 5455 | 12.729179 | 8.9962626 | MACROD1  | 1.414940756 |
| 5456 | 1.5664605 | 1.1070856 | TMEM198B | 1.414940756 |
| 5457 | 2.0586577 | 1.4549427 | COX20    | 1.414940756 |
| 5458 | 11.069257 | 7.8284437 | NR3C1    | 1.413979259 |
| 5459 | 22.95013  | 16.23704  | FKBP3    | 1.413442937 |

|      |           |           |              |             |
|------|-----------|-----------|--------------|-------------|
| 5460 | 30.345109 | 21.471104 | CREB3        | 1.413299929 |
| 5461 | 3.5675906 | 2.5246077 | PCBD2        | 1.41312673  |
| 5462 | 29.438    | 20.831819 | LSM1         | 1.41312673  |
| 5463 | 14.070344 | 9.9579866 | HIP1R        | 1.412970774 |
| 5464 | 8.7813183 | 6.2178042 | MRPS36       | 1.412286084 |
| 5465 | 22.479479 | 15.918192 | AGBL5        | 1.412187954 |
| 5466 | 383.55008 | 271.60151 | DYNLRB1      | 1.412179448 |
| 5467 | 43.776226 | 31.007361 | NDUFS4       | 1.411801096 |
| 5468 | 21.910381 | 15.528566 | GPX7         | 1.410972574 |
| 5469 | 63.538089 | 45.036424 | BNIP3        | 1.410815565 |
| 5470 | 3.0767643 | 2.1821125 | SLC16A5      | 1.409993412 |
| 5471 | 0.8712354 | 0.6179003 | TMEM182      | 1.409993412 |
| 5472 | 9.5693648 | 6.7868153 | ALKBH6       | 1.409993412 |
| 5473 | 5.8429766 | 4.1439744 | CRNDE        | 1.409993411 |
| 5474 | 225.4117  | 159.90148 | PSMB3        | 1.409691162 |
| 5475 | 80.388906 | 57.041844 | ROMO1        | 1.409297119 |
| 5476 | 28.681872 | 20.363227 | NDUFC1       | 1.408513103 |
| 5477 | 255.75465 | 181.58909 | SH3BGRL3     | 1.408425214 |
| 5478 | 14.686495 | 10.427989 | MRPS18C      | 1.40837273  |
| 5479 | 7.2809884 | 5.1721544 | IRGQ         | 1.407728362 |
| 5480 | 32.624842 | 23.181222 | RBM10        | 1.407382312 |
| 5481 | 46.001227 | 32.692544 | MRPL16       | 1.407086209 |
| 5482 | 18.177231 | 12.923389 | BPGM         | 1.406537545 |
| 5483 | 4.9285298 | 3.5047736 | TSC1         | 1.406233429 |
| 5484 | 4.8081314 | 3.419156  | BAIAP2-AS1   | 1.406233429 |
| 5485 | 828.26443 | 589.16889 | TPI1         | 1.40581833  |
| 5486 | 13.129377 | 9.3402685 | SIPA1L3      | 1.405674513 |
| 5487 | 15.26158  | 10.857796 | ACOT8        | 1.405587182 |
| 5488 | 8.050418  | 5.7291298 | LOC100506054 | 1.405172921 |
| 5489 | 23.468412 | 16.704867 | LRWD1        | 1.40488474  |
| 5490 | 13.625715 | 9.7045339 | TBCE         | 1.404056597 |
| 5491 | 33.383662 | 23.782166 | ELF4         | 1.403726774 |
| 5492 | 155.98993 | 111.14161 | PSMD3        | 1.403524121 |
| 5493 | 0.5548754 | 0.3954134 | ZNF793       | 1.403279159 |
| 5494 | 2.3968466 | 1.7080326 | LOC440434    | 1.403279157 |
| 5495 | 3.5688062 | 2.5431905 | STAG3L4      | 1.403279157 |
| 5496 | 1.1587915 | 0.825774  | APOL4        | 1.403279157 |
| 5497 | 5.2488358 | 3.7404074 | DNAJC16      | 1.403279157 |
| 5498 | 5.9568308 | 4.2449364 | TIA1         | 1.403279157 |
| 5499 | 11.346793 | 8.0884022 | SUPT7L       | 1.402847246 |
| 5500 | 27.913724 | 19.908155 | PLXNA1       | 1.402125145 |
| 5501 | 6.3809619 | 4.5517863 | SNIP1        | 1.401858834 |
| 5502 | 15.493442 | 11.053812 | SMYD3        | 1.401637895 |



|      |           |           |              |             |
|------|-----------|-----------|--------------|-------------|
| 5503 | 6.0219657 | 4.2963776 | FBXL14       | 1.401637895 |
| 5504 | 49.208256 | 35.128593 | COPS7A       | 1.40080351  |
| 5505 | 13.728963 | 9.8009139 | ZNF629       | 1.400783995 |
| 5506 | 48.103238 | 34.347382 | MBTPS1       | 1.400492108 |
| 5507 | 10.358237 | 7.3971642 | ARSB         | 1.400298389 |
| 5508 | 67.560935 | 48.250856 | CUEDC2       | 1.400201791 |
| 5509 | 9.008743  | 6.4345039 | GLCE         | 1.400067992 |
| 5510 | 6.2988686 | 4.4996085 | KIAA1033     | 1.399870382 |
| 5511 | 59.893835 | 42.786694 | ATP6V1G1     | 1.399823869 |
| 5512 | 91.041873 | 65.040313 | NELFE        | 1.399776068 |
| 5513 | 15.929035 | 11.382479 | PHF15        | 1.399434556 |
| 5514 | 5.2099875 | 3.7242537 | CCDC61       | 1.39893464  |
| 5515 | 2.0361888 | 1.4555282 | DOK3         | 1.39893464  |
| 5516 | 21.16198  | 15.127211 | C1orf122     | 1.398934639 |
| 5517 | 5.043005  | 3.6060176 | CPEB4        | 1.398497062 |
| 5518 | 401.04664 | 286.7785  | AP2M1        | 1.398454341 |
| 5519 | 19.583123 | 14.012643 | PPP1CB       | 1.397532375 |
| 5520 | 3.1777905 | 2.2742514 | NCOA7        | 1.397290769 |
| 5521 | 6.5609163 | 4.6964545 | IFIT5        | 1.396993472 |
| 5522 | 1.9398146 | 1.3889899 | DMXL1        | 1.396564903 |
| 5523 | 33.719141 | 24.151415 | R3HCC1       | 1.396155913 |
| 5524 | 12.661447 | 9.0690791 | CRTC3        | 1.396111619 |
| 5525 | 17.172288 | 12.302005 | ZNHIT3       | 1.395893478 |
| 5526 | 42.458478 | 30.420422 | NDST1        | 1.395722851 |
| 5527 | 289.10594 | 207.16125 | PRKCSH       | 1.395559931 |
| 5528 | 7.8132974 | 5.6021703 | GXYLT2       | 1.394691157 |
| 5529 | 9.8030584 | 7.0288381 | C4orf27      | 1.394691157 |
| 5530 | 8.1252318 | 5.8321796 | TLE1         | 1.393172438 |
| 5531 | 16.094453 | 11.55953  | GTF2IRD1     | 1.392310327 |
| 5532 | 4.6295871 | 3.3251115 | SEMA4F       | 1.392310326 |
| 5533 | 5.6674301 | 4.0716737 | LOC100132352 | 1.391916573 |
| 5534 | 26.384301 | 18.961255 | RPTOR        | 1.391484971 |
| 5535 | 430.75878 | 309.71507 | IER3         | 1.39082277  |
| 5536 | 5.7452266 | 4.1316359 | ZBTB18       | 1.390545226 |
| 5537 | 7.8503535 | 5.6500492 | RRNAD1       | 1.389431008 |
| 5538 | 399.19663 | 287.42608 | EIF1         | 1.388867122 |
| 5539 | 40.06983  | 28.855388 | ZDHHC5       | 1.388642902 |
| 5540 | 14.332421 | 10.322175 | KCTD9        | 1.388507799 |
| 5541 | 5.5970151 | 4.0309569 | FBXW9        | 1.388507798 |
| 5542 | 5.5212945 | 3.9764231 | PLEKHF1      | 1.388507798 |
| 5543 | 16.074761 | 11.578968 | EPHB4        | 1.388272398 |
| 5544 | 5.2930152 | 3.8141525 | ZSWIM7       | 1.387730358 |
| 5545 | 9.8538383 | 7.1030078 | LRSAM1       | 1.387276851 |

|      |           |           |              |             |
|------|-----------|-----------|--------------|-------------|
| 5546 | 2.9165324 | 2.102662  | KIAA1919     | 1.387066689 |
| 5547 | 15.996526 | 11.534033 | LPP          | 1.386897918 |
| 5548 | 14.179023 | 10.224192 | IFFO2        | 1.386811088 |
| 5549 | 30.51805  | 22.013721 | CDK9         | 1.386319448 |
| 5550 | 45.371857 | 32.762969 | RNF11        | 1.384851813 |
| 5551 | 7.7354861 | 5.5886947 | SLC35B4      | 1.384131099 |
| 5552 | 84.674749 | 61.273628 | RHEB         | 1.381911782 |
| 5553 | 26.792336 | 19.401693 | MKRN1        | 1.380927757 |
| 5554 | 23.503703 | 17.03018  | B3GALT6      | 1.38012067  |
| 5555 | 33.683907 | 24.417126 | REPIN1       | 1.379519739 |
| 5556 | 49.313464 | 35.749734 | CDCA5        | 1.379407871 |
| 5557 | 54.120991 | 39.238123 | TCEA1        | 1.379296138 |
| 5558 | 107.20244 | 77.727527 | ARPC1A       | 1.379208181 |
| 5559 | 0.1678273 | 0.1217321 | ZNF471       | 1.378660229 |
| 5560 | 0.2073111 | 0.1503714 | ESRP2        | 1.378660229 |
| 5561 | 0.1063534 | 0.0771426 | KIAA1210     | 1.378660229 |
| 5562 | 0.2248107 | 0.1630646 | LINC00672    | 1.378660228 |
| 5563 | 0.1712755 | 0.1242333 | GBP6         | 1.378660228 |
| 5564 | 0.1215512 | 0.0881662 | DNAH10       | 1.378660228 |
| 5565 | 0.4182629 | 0.3033836 | STAG3L3      | 1.378660228 |
| 5566 | 0.335587  | 0.2434153 | RBM26-AS1    | 1.378660227 |
| 5567 | 0.5039891 | 0.3655644 | NUTM2A       | 1.378660227 |
| 5568 | 0.6206984 | 0.4502186 | ANXA2P1      | 1.378660226 |
| 5569 | 0.3695027 | 0.2680158 | LOC283143    | 1.378660226 |
| 5570 | 0.2153444 | 0.1561983 | LOC401320    | 1.378660226 |
| 5571 | 1.3986544 | 1.0145026 | ZNF419       | 1.378660226 |
| 5572 | 0.4675255 | 0.3391158 | LOC100506472 | 1.378660225 |
| 5573 | 0.5129834 | 0.3720883 | UPK3B        | 1.378660225 |
| 5574 | 11.002276 | 7.9804118 | NUMBL        | 1.378660225 |
| 5575 | 0.7690018 | 0.5577892 | LOC100506963 | 1.378660225 |
| 5576 | 3.8150938 | 2.7672473 | HIST2H2AC    | 1.378660225 |
| 5577 | 0.4950107 | 0.359052  | C12orf61     | 1.378660225 |
| 5578 | 0.8805613 | 0.638708  | C5orf63      | 1.378660225 |
| 5579 | 0.4195259 | 0.3042997 | ASH1L-AS1    | 1.378660225 |
| 5580 | 2.6775096 | 1.9421099 | RNF122       | 1.378660225 |
| 5581 | 0.254845  | 0.1848498 | NR2E1        | 1.378660225 |
| 5582 | 1.3401897 | 0.9720957 | SCG5         | 1.378660225 |
| 5583 | 9.6036636 | 6.9659394 | EHD3         | 1.378660225 |
| 5584 | 55.975072 | 40.601064 | OAZ2         | 1.378660225 |
| 5585 | 1.8572551 | 1.3471449 | PEX12        | 1.378660225 |
| 5586 | 3.4132766 | 2.4757925 | ANKRA2       | 1.378660225 |
| 5587 | 3.9600855 | 2.8724159 | SCARNA17     | 1.378660225 |
| 5588 | 0.3021377 | 0.2191532 | MAGEA10      | 1.378660225 |

|      |           |           |                    |             |
|------|-----------|-----------|--------------------|-------------|
| 5589 | 30.178824 | 21.889965 | WTAP               | 1.378660225 |
| 5590 | 2.7241765 | 1.9759593 | HARB11             | 1.378660225 |
| 5591 | 8.4974312 | 6.1635427 | COG7               | 1.378660225 |
| 5592 | 6.9246669 | 5.0227509 | SEC61A2            | 1.378660225 |
| 5593 | 1.3901575 | 1.0083394 | PDE4D              | 1.378660225 |
| 5594 | 0.6749781 | 0.4895899 | PTGER4P2-CDK2AP2P2 | 1.378660225 |
| 5595 | 1.5720849 | 1.140299  | LOC389791          | 1.378660224 |
| 5596 | 3.6180469 | 2.6243209 | C19orf40           | 1.378660224 |
| 5597 | 2.9688888 | 2.1534594 | SH3D21             | 1.378660224 |
| 5598 | 0.9387365 | 0.6809049 | HMGB3P1            | 1.378660224 |
| 5599 | 0.1528416 | 0.1108624 | TMEM236            | 1.378660224 |
| 5600 | 1.5115104 | 1.0963618 | ZNF773             | 1.378660224 |
| 5601 | 0.5249358 | 0.3807579 | TMEM27             | 1.378660224 |
| 5602 | 1.0316807 | 0.7483212 | MDP1               | 1.378660224 |
| 5603 | 0.2824798 | 0.2048945 | LOC286467          | 1.378660224 |
| 5604 | 1.4522613 | 1.053386  | SOCS2-AS1          | 1.378660224 |
| 5605 | 0.8220888 | 0.5962954 | INE1               | 1.378660224 |
| 5606 | 0.4920885 | 0.3569324 | ZNF383             | 1.378660224 |
| 5607 | 0.3574605 | 0.2592811 | AKR7L              | 1.378660224 |
| 5608 | 0.8618227 | 0.6251161 | APLF               | 1.378660224 |
| 5609 | 0.8124737 | 0.5893212 | HUS1B              | 1.378660224 |
| 5610 | 0.2212896 | 0.1605106 | PALM2-AKAP2        | 1.378660223 |
| 5611 | 0.3436101 | 0.2492348 | ANKFN1             | 1.378660223 |
| 5612 | 0.311044  | 0.2256133 | CLHC1              | 1.378660223 |
| 5613 | 0.5155213 | 0.3739292 | LOC100505666       | 1.378660222 |
| 5614 | 0.120115  | 0.0871244 | PAPPA2             | 1.378660222 |
| 5615 | 0.2217016 | 0.1608095 | ARL11              | 1.378660221 |
| 5616 | 0.2821452 | 0.2046517 | KCNT2              | 1.378660221 |
| 5617 | 0.2202373 | 0.1597473 | NUDT4P1            | 1.378660221 |
| 5618 | 0.1743929 | 0.1264945 | DGKI               | 1.37866022  |
| 5619 | 0.1250522 | 0.0907056 | POTEM              | 1.378660218 |
| 5620 | 0.1599996 | 0.1160544 | ZNF716             | 1.378660217 |
| 5621 | 0.1057731 | 0.0767217 | ZNF99              | 1.378660214 |
| 5622 | 0.0510752 | 0.037047  | MUC12              | 1.378660202 |
| 5623 | 28.135177 | 20.419662 | WIZ                | 1.377847335 |
| 5624 | 16.9375   | 12.300479 | MGC2752            | 1.376978932 |
| 5625 | 80.488325 | 58.486745 | G6PD               | 1.37618062  |
| 5626 | 12.357725 | 8.9812549 | PRKCD              | 1.375946327 |
| 5627 | 23.700335 | 17.230365 | GMNN               | 1.37549816  |
| 5628 | 26.158933 | 19.02102  | NDUFV3             | 1.37526451  |
| 5629 | 184.11636 | 133.87745 | VCL                | 1.375260436 |
| 5630 | 5.5071734 | 4.0054089 | NOTCH1             | 1.374934116 |
| 5631 | 50.210574 | 36.543709 | PLEKHO1            | 1.3739868   |

|      |           |           |              |             |
|------|-----------|-----------|--------------|-------------|
| 5632 | 214.53534 | 156.19428 | H2AFZ        | 1.373515971 |
| 5633 | 4.1981792 | 3.0565201 | RNF19A       | 1.37351597  |
| 5634 | 8.8617083 | 6.4518422 | MAN2A2       | 1.37351597  |
| 5635 | 7.9583606 | 5.7959028 | APPBP2       | 1.373101111 |
| 5636 | 13.210688 | 9.6255457 | SLC36A1      | 1.372461213 |
| 5637 | 48.843633 | 35.61837  | ERAL1        | 1.371304568 |
| 5638 | 4.0705634 | 2.9686843 | FIG4         | 1.371167506 |
| 5639 | 24.298071 | 17.724661 | MPZL1        | 1.370862373 |
| 5640 | 10.729252 | 7.8285349 | DENND3       | 1.370531332 |
| 5641 | 140.75149 | 102.7085  | NDUFB7       | 1.370397707 |
| 5642 | 40.104872 | 29.266045 | SDHC         | 1.370355042 |
| 5643 | 21.501931 | 15.692524 | SKIV2L       | 1.370202187 |
| 5644 | 22.152703 | 16.1751   | ZC3H3        | 1.369555864 |
| 5645 | 9.9566844 | 7.2711294 | MAN2A1       | 1.369344953 |
| 5646 | 10.771704 | 7.8663189 | PTS          | 1.369344952 |
| 5647 | 76.425252 | 55.829456 | RNASEH2A     | 1.368905553 |
| 5648 | 3.9459924 | 2.8827849 | FOXO3        | 1.368812652 |
| 5649 | 10.9892   | 8.0282716 | CISD3        | 1.368812651 |
| 5650 | 324.7123  | 237.22474 | ARPC2        | 1.368796073 |
| 5651 | 115.63388 | 84.619325 | EID1         | 1.366518615 |
| 5652 | 25.235285 | 18.469112 | IFI16        | 1.366350758 |
| 5653 | 51.813612 | 37.928647 | MRPL27       | 1.366081208 |
| 5654 | 16.057978 | 11.761716 | COPS4        | 1.365275173 |
| 5655 | 0.8260881 | 0.6052488 | ABCC9        | 1.364873623 |
| 5656 | 2.1147551 | 1.5494146 | ANKMY1       | 1.364873623 |
| 5657 | 23.04671  | 16.898844 | ZBTB17       | 1.363803972 |
| 5658 | 84.072277 | 61.670196 | NDUFA7       | 1.3632562   |
| 5659 | 19.731662 | 14.474982 | ARL4C        | 1.363156261 |
| 5660 | 6.1858603 | 4.5384367 | LOC100506451 | 1.362993631 |
| 5661 | 2.991874  | 2.1950756 | ZNF821       | 1.362993631 |
| 5662 | 1.5975642 | 1.1720996 | SLC10A7      | 1.362993631 |
| 5663 | 8.5181872 | 6.2556927 | KIF7         | 1.361669694 |
| 5664 | 6.5933362 | 4.8429599 | NHSL1        | 1.361426972 |
| 5665 | 181.50924 | 133.32498 | ZYX          | 1.361404562 |
| 5666 | 58.810872 | 43.20298  | MRPS6        | 1.361268869 |
| 5667 | 24.523888 | 18.021236 | TRIM21       | 1.360832722 |
| 5668 | 22.154181 | 16.281192 | DNAJC14      | 1.360722266 |
| 5669 | 363.02982 | 266.80449 | COX6A1       | 1.36065861  |
| 5670 | 7.2613066 | 5.3371555 | RILPL2       | 1.360519959 |
| 5671 | 39.568175 | 29.087253 | PMAIP1       | 1.360326977 |
| 5672 | 38.372962 | 28.210664 | MOB1A        | 1.360228938 |
| 5673 | 10.753236 | 7.9072077 | QPCTL        | 1.359928428 |
| 5674 | 160.54346 | 118.06442 | CDC42        | 1.359795421 |

|      |           |           |           |             |
|------|-----------|-----------|-----------|-------------|
| 5675 | 4.756622  | 3.4980963 | RPS6KC1   | 1.359774468 |
| 5676 | 41.103449 | 30.238237 | TBC1D10B  | 1.359320302 |
| 5677 | 32.869916 | 24.183013 | ANTXR1    | 1.359215087 |
| 5678 | 37.288874 | 27.434774 | SKA2      | 1.359182838 |
| 5679 | 14.004982 | 10.304215 | CPT2      | 1.359150883 |
| 5680 | 52.313108 | 38.494814 | MMADHC    | 1.358965078 |
| 5681 | 263.15864 | 193.72737 | FSTL1     | 1.358396796 |
| 5682 | 45.570959 | 33.563056 | ISCU      | 1.357771433 |
| 5683 | 7.6290072 | 5.6189733 | CCSER2    | 1.357722628 |
| 5684 | 15.693833 | 11.559881 | POC1A     | 1.357611977 |
| 5685 | 48.267241 | 35.560453 | IDH3G     | 1.357329163 |
| 5686 | 1.976689  | 1.4565337 | DGCR11    | 1.357118659 |
| 5687 | 2.8944375 | 2.1327815 | ZRSR2     | 1.357118659 |
| 5688 | 2.4641833 | 1.8157464 | TMEM107   | 1.357118658 |
| 5689 | 22.647671 | 16.691197 | ASH2L     | 1.356863225 |
| 5690 | 25.624358 | 18.889695 | GSDMD     | 1.356525771 |
| 5691 | 30.922816 | 22.797312 | ADAM9     | 1.356423769 |
| 5692 | 14.771479 | 10.890844 | MEF2D     | 1.356320822 |
| 5693 | 135.82458 | 100.18575 | ATP6V0B   | 1.355727521 |
| 5694 | 8.6984139 | 6.4171756 | GGCX      | 1.355489464 |
| 5695 | 13.703815 | 10.111753 | ST3GAL4   | 1.355236386 |
| 5696 | 36.953044 | 27.277152 | BTG3      | 1.354725151 |
| 5697 | 17.941094 | 13.24848  | SLC25A46  | 1.354200124 |
| 5698 | 2.0290268 | 1.498497  | AHI1      | 1.354041292 |
| 5699 | 17.244126 | 12.740274 | PTPN18    | 1.353512989 |
| 5700 | 16.114297 | 11.907258 | IRF2      | 1.353317206 |
| 5701 | 9.4069888 | 6.9537829 | ORAI2     | 1.352787245 |
| 5702 | 35.887946 | 26.53356  | IER3IP1   | 1.352549235 |
| 5703 | 10.068947 | 7.4448821 | MED14     | 1.35246568  |
| 5704 | 16.311195 | 12.063177 | PDCL3     | 1.352147528 |
| 5705 | 2.4191134 | 1.7890898 | LYSMD4    | 1.352147528 |
| 5706 | 0.8823889 | 0.6525833 | LINC00476 | 1.352147527 |
| 5707 | 7.3133789 | 5.4123316 | CNKS3     | 1.351243686 |
| 5708 | 30.060503 | 22.257262 | SPTLC1    | 1.350593037 |
| 5709 | 211.10759 | 156.3097  | CDC37     | 1.350572516 |
| 5710 | 438.41177 | 324.80747 | TUBB4B    | 1.349758903 |
| 5711 | 36.041197 | 26.704387 | SFT2D1    | 1.349635799 |
| 5712 | 204.80402 | 151.79616 | PSMC5     | 1.349204269 |
| 5713 | 1.1063502 | 0.8203151 | STON1     | 1.34868935  |
| 5714 | 27.604335 | 20.47037  | SUCLG2    | 1.348502032 |
| 5715 | 7.2121271 | 5.3489344 | SMIM13    | 1.3483297   |
| 5716 | 14.343567 | 10.639679 | ENY2      | 1.348120284 |
| 5717 | 6.5744008 | 4.8775624 | TUBE1     | 1.347886559 |

|      |           |           |              |             |
|------|-----------|-----------|--------------|-------------|
| 5718 | 12.817281 | 9.5100676 | ARHGAP10     | 1.347759219 |
| 5719 | 5.9661641 | 4.4281484 | CDPF1        | 1.347327038 |
| 5720 | 4.0121686 | 2.9778728 | DNM1P41      | 1.347327038 |
| 5721 | 11.876264 | 8.8208829 | ATF6         | 1.346380415 |
| 5722 | 28.941855 | 21.497267 | LPCAT3       | 1.346303913 |
| 5723 | 31.487152 | 23.388341 | MLX          | 1.346275589 |
| 5724 | 78.520191 | 58.386787 | ATP6V0D1     | 1.344828072 |
| 5725 | 2.0717768 | 1.5412785 | FUK          | 1.344193719 |
| 5726 | 5.4934644 | 4.08681   | KCTD18       | 1.344193719 |
| 5727 | 1.0828112 | 0.805547  | ARRDC3-AS1   | 1.344193719 |
| 5728 | 2.1630287 | 1.6091644 | GLB1L        | 1.344193719 |
| 5729 | 4.0955306 | 3.0468306 | PMS2P5       | 1.344193719 |
| 5730 | 5.1860519 | 3.8581135 | JMJD4        | 1.344193719 |
| 5731 | 1.2944068 | 0.9629615 | LOC100507501 | 1.344193718 |
| 5732 | 31.632799 | 23.539013 | BLMH         | 1.343845573 |
| 5733 | 30.166393 | 22.448232 | FPGS         | 1.343820436 |
| 5734 | 87.94063  | 65.450635 | VPS4A        | 1.343617677 |
| 5735 | 46.625304 | 34.715473 | SEC31A       | 1.343069811 |
| 5736 | 26.805008 | 19.960053 | HIATL1       | 1.342932749 |
| 5737 | 10.274193 | 7.6537157 | NMI          | 1.342379693 |
| 5738 | 72.292598 | 53.882752 | TRIM8        | 1.341664927 |
| 5739 | 19.344861 | 14.422555 | TBC1D16      | 1.341292202 |
| 5740 | 15.123703 | 11.279738 | LYRM4        | 1.340784944 |
| 5741 | 3.3752811 | 2.5181823 | PTOV1-AS1    | 1.340364108 |
| 5742 | 17.013234 | 12.69439  | PPIL2        | 1.340216814 |
| 5743 | 7.0174016 | 5.2366412 | ITGA1        | 1.340057738 |
| 5744 | 22.730601 | 16.965917 | SH3PXD2B     | 1.339780325 |
| 5745 | 25.317375 | 18.907863 | CERK         | 1.338986549 |
| 5746 | 3.0801656 | 2.3007745 | PRICKLE2     | 1.338751639 |
| 5747 | 90.664525 | 67.736699 | BRMS1        | 1.338484543 |
| 5748 | 1.8171974 | 1.3580315 | ZNF416       | 1.338111395 |
| 5749 | 1.6315975 | 1.2193286 | SH3RF3-AS1   | 1.338111394 |
| 5750 | 7.0256202 | 5.2539913 | PHTF2        | 1.337196759 |
| 5751 | 2.8228215 | 2.111211  | EIF5A2       | 1.337062718 |
| 5752 | 18.344342 | 13.729076 | ARL1         | 1.336167272 |
| 5753 | 3.5940943 | 2.6910422 | PROS1        | 1.335577093 |
| 5754 | 39.048664 | 29.237297 | RCE1         | 1.335577093 |
| 5755 | 3.7022261 | 2.7720048 | PLA2G12A     | 1.335577093 |
| 5756 | 5.3568694 | 4.0109024 | LIME1        | 1.335577092 |
| 5757 | 12.835201 | 9.6102285 | NFKBIL1      | 1.335577092 |
| 5758 | 178.26711 | 133.48785 | DDOST        | 1.335455732 |
| 5759 | 8.6358627 | 6.4704568 | RFX1         | 1.33466043  |
| 5760 | 10.908113 | 8.1758483 | PLEKHG2      | 1.334187314 |

|      |           |           |           |             |
|------|-----------|-----------|-----------|-------------|
| 5761 | 34.912905 | 26.178054 | ARHGAP17  | 1.333670759 |
| 5762 | 9.4422653 | 7.0809441 | XYLT1     | 1.333475476 |
| 5763 | 7.050629  | 5.2897528 | RAB8B     | 1.332884397 |
| 5764 | 26.003668 | 19.510404 | CPNE2     | 1.332810286 |
| 5765 | 31.500181 | 23.637265 | CD2BP2    | 1.332649113 |
| 5766 | 18.47334  | 13.866136 | SPIN1     | 1.332263006 |
| 5767 | 19.022843 | 14.278594 | HAUS8     | 1.332263005 |
| 5768 | 42.614427 | 31.994591 | SPNS1     | 1.33192598  |
| 5769 | 6445.3059 | 4839.216  | ACTB      | 1.331890509 |
| 5770 | 27.259282 | 20.483533 | CSRNP1    | 1.330790078 |
| 5771 | 33.076565 | 24.861988 | MVB12A    | 1.330407117 |
| 5772 | 30.735817 | 23.110133 | SNHG3     | 1.32997148  |
| 5773 | 54.340917 | 40.860651 | MAP1B     | 1.329908259 |
| 5774 | 0.9248499 | 0.695678  | PRSS53    | 1.32942236  |
| 5775 | 0.8018792 | 0.6031787 | A2M       | 1.32942236  |
| 5776 | 1.1457517 | 0.8618417 | NMUR1     | 1.32942236  |
| 5777 | 11.504287 | 8.6535983 | SUDS3     | 1.32942236  |
| 5778 | 1.4960879 | 1.1253669 | PRRT3     | 1.32942236  |
| 5779 | 3.0398631 | 2.2866044 | TYMP      | 1.32942236  |
| 5780 | 1.3650622 | 1.0268085 | CEMP1     | 1.329422359 |
| 5781 | 8.9068519 | 6.699791  | HSPA13    | 1.329422359 |
| 5782 | 2.3136458 | 1.7403391 | ATG10     | 1.329422359 |
| 5783 | 29.977552 | 22.549306 | UBAC1     | 1.329422359 |
| 5784 | 0.6931247 | 0.5213728 | TMEM117   | 1.329422359 |
| 5785 | 2.5763674 | 1.9379601 | C2orf48   | 1.329422359 |
| 5786 | 0.5181203 | 0.3897334 | TEC       | 1.329422359 |
| 5787 | 0.9778913 | 0.7355761 | NR6A1     | 1.329422359 |
| 5788 | 1.1408732 | 0.8581721 | IDNK      | 1.329422359 |
| 5789 | 0.2578847 | 0.1939825 | ZC3H12B   | 1.329422357 |
| 5790 | 9.6604926 | 7.2700222 | STAMPB    | 1.328811973 |
| 5791 | 21.821937 | 16.43135  | RUFY1     | 1.328067189 |
| 5792 | 6.7038503 | 5.0496058 | SHOX2     | 1.327598735 |
| 5793 | 140.50853 | 105.86457 | H2AFY     | 1.327247969 |
| 5794 | 151.79717 | 114.45927 | COPE      | 1.326211195 |
| 5795 | 51.650922 | 38.953236 | HEXA      | 1.325972573 |
| 5796 | 7.3900532 | 5.5747277 | C16orf87  | 1.325634831 |
| 5797 | 45.691869 | 34.489471 | LINC00493 | 1.32480631  |
| 5798 | 3.463835  | 2.6157166 | PEX2      | 1.324239426 |
| 5799 | 10.827287 | 8.177597  | CCNE1     | 1.324018203 |
| 5800 | 15.21551  | 11.494011 | CCDC3     | 1.323777253 |
| 5801 | 8.749235  | 6.6101329 | ENAH      | 1.323609556 |
| 5802 | 87.202628 | 65.883145 | ARPC1B    | 1.323595393 |
| 5803 | 16.506891 | 12.47202  | LIMD2     | 1.323513816 |

|      |           |           |           |             |
|------|-----------|-----------|-----------|-------------|
| 5804 | 6.9264479 | 5.2333778 | CNNM4     | 1.323513816 |
| 5805 | 14.973184 | 11.321434 | ACVR1     | 1.32255196  |
| 5806 | 20.528906 | 15.522192 | GLE1      | 1.32255196  |
| 5807 | 2.6343306 | 1.9918542 | IRAK4     | 1.32255196  |
| 5808 | 13.62356  | 10.302765 | TOR4A     | 1.322320745 |
| 5809 | 56.617501 | 42.824586 | PPP1R9B   | 1.322079372 |
| 5810 | 24.017002 | 18.16735  | TCF19     | 1.321987112 |
| 5811 | 23.94579  | 18.114084 | TAB2      | 1.32194319  |
| 5812 | 27.549215 | 20.843527 | PRCP      | 1.321715563 |
| 5813 | 9.6442425 | 7.2995196 | STARD10   | 1.321216049 |
| 5814 | 5.1045671 | 3.863537  | ZNF764    | 1.321216049 |
| 5815 | 3.0725567 | 2.3255521 | LOC220729 | 1.321216048 |
| 5816 | 93.589332 | 70.866258 | VASP      | 1.320647294 |
| 5817 | 11.724176 | 8.8775982 | ZFYVE19   | 1.320647294 |
| 5818 | 4.4511473 | 3.3712326 | TRIM59    | 1.320332292 |
| 5819 | 69.250363 | 52.487725 | ST13      | 1.319363011 |
| 5820 | 7.3362593 | 5.5618066 | ATF7      | 1.319042485 |
| 5821 | 8.5409631 | 6.4759636 | S1PR1     | 1.318871388 |
| 5822 | 6.3469611 | 4.8134784 | TRAPPC11  | 1.318580995 |
| 5823 | 13.722885 | 10.409185 | TSC22D1   | 1.31834384  |
| 5824 | 3.0323465 | 2.3001181 | RNF182    | 1.31834384  |
| 5825 | 1.2401325 | 0.9410364 | KLF12     | 1.31783698  |
| 5826 | 6.2545911 | 4.74675   | LEMD3     | 1.31765756  |
| 5827 | 31.643705 | 24.02047  | BRD9      | 1.317364107 |
| 5828 | 106.81291 | 81.082467 | PSMC4     | 1.317336702 |
| 5829 | 21.117816 | 16.034251 | FOPNL     | 1.317044125 |
| 5830 | 11.16359  | 8.477835  | RNF41     | 1.316797266 |
| 5831 | 34.73325  | 26.384662 | CMTM6     | 1.316418228 |
| 5832 | 0.4605514 | 0.3499647 | HDX       | 1.315993853 |
| 5833 | 0.7299457 | 0.5546726 | PDGFD     | 1.315993851 |
| 5834 | 3.6025226 | 2.737492  | SERINC5   | 1.315993851 |
| 5835 | 8.0109638 | 6.0873869 | TVP23B    | 1.315993851 |
| 5836 | 12.730158 | 9.6734173 | CDC42SE2  | 1.31599385  |
| 5837 | 21.704567 | 16.508303 | PPP3CA    | 1.314766702 |
| 5838 | 44.11544  | 33.554272 | KIFC1     | 1.314748823 |
| 5839 | 16.100309 | 12.246831 | WWP2      | 1.314651    |
| 5840 | 7.0805709 | 5.385894  | ULK1      | 1.314651    |
| 5841 | 12.960168 | 9.8601351 | PRKAB1    | 1.314400638 |
| 5842 | 11.210202 | 8.5311258 | APOO      | 1.314035526 |
| 5843 | 27.187683 | 20.692093 | EIF2B4    | 1.313916513 |
| 5844 | 5.0796196 | 3.8673773 | PARP14    | 1.313453322 |
| 5845 | 8.824123  | 6.7182616 | TMEM183A  | 1.313453322 |
| 5846 | 0.9103798 | 0.6931193 | PAG1      | 1.313453322 |



|      |           |           |              |             |
|------|-----------|-----------|--------------|-------------|
| 5847 | 93.335163 | 71.062266 | YARS         | 1.313427894 |
| 5848 | 3.1107305 | 2.3691603 | REV3L        | 1.313009738 |
| 5849 | 39.813201 | 30.323854 | STYXL1       | 1.3129334   |
| 5850 | 518.90077 | 395.25021 | RPS7         | 1.31284123  |
| 5851 | 3.9456016 | 3.006451  | LOC100505783 | 1.312378483 |
| 5852 | 0.8946512 | 0.6817021 | TRDMT1       | 1.312378483 |
| 5853 | 15.651069 | 11.933341 | FAM189B      | 1.311541241 |
| 5854 | 50.93279  | 38.839347 | EHD1         | 1.311370921 |
| 5855 | 36.021887 | 27.475893 | DHX16        | 1.311036068 |
| 5856 | 38.855999 | 29.639389 | CCM2         | 1.31095816  |
| 5857 | 5.4895811 | 4.1879216 | JARID2       | 1.310812773 |
| 5858 | 22.2204   | 16.951802 | WDR26        | 1.310798711 |
| 5859 | 3.5739244 | 2.7267335 | LGR4         | 1.310698101 |
| 5860 | 9.6195947 | 7.3409061 | SLC38A7      | 1.310409718 |
| 5861 | 16.267545 | 12.416998 | ESYT2        | 1.310102871 |
| 5862 | 25.707925 | 19.625556 | TMEM8A       | 1.309920845 |
| 5863 | 2.42325   | 1.8501944 | ZNF786       | 1.309727214 |
| 5864 | 1.8864176 | 1.4403133 | ZNF79        | 1.309727213 |
| 5865 | 3.7179254 | 2.8387021 | PHKA2        | 1.309727213 |
| 5866 | 3.4978715 | 2.670687  | HHIP-AS1     | 1.309727213 |
| 5867 | 5.2423477 | 4.0059199 | NRG1         | 1.308650135 |
| 5868 | 23.674047 | 18.094992 | SOX4         | 1.308320417 |
| 5869 | 9.0792082 | 6.9428843 | MED30        | 1.307699772 |
| 5870 | 12.76595  | 9.7696311 | TMEM194A     | 1.306697191 |
| 5871 | 10.139143 | 7.7599801 | LOC100129034 | 1.306593895 |
| 5872 | 119.00209 | 91.112603 | PPP4C        | 1.306099161 |
| 5873 | 3.3101178 | 2.5343541 | DPY19L3      | 1.30609916  |
| 5874 | 48.239263 | 36.933844 | PI4KB        | 1.30609916  |
| 5875 | 5849.0793 | 4479.7368 | GAPDH        | 1.305674763 |
| 5876 | 7.0778257 | 5.4213386 | KIDINS220    | 1.305549455 |
| 5877 | 0.01      | 0.0076614 | NEB          | 1.305248391 |
| 5878 | 19.445728 | 14.903186 | ITGB3BP      | 1.304803427 |
| 5879 | 24.490407 | 18.769423 | LRRC42       | 1.304803427 |
| 5880 | 6.3453697 | 4.8630848 | MTMR6        | 1.304803427 |
| 5881 | 8.5813428 | 6.5778922 | SRGAP2       | 1.304573343 |
| 5882 | 4.9275055 | 3.7795357 | LOC100190986 | 1.303733039 |
| 5883 | 49.836612 | 38.229076 | CDK2         | 1.303631096 |
| 5884 | 196.96469 | 151.09177 | EIF3I        | 1.303609645 |
| 5885 | 83.600219 | 64.152881 | FHL2         | 1.303140534 |
| 5886 | 19.415497 | 14.908502 | UBA3         | 1.302310371 |
| 5887 | 42.209089 | 32.413378 | NT5C3B       | 1.30221196  |
| 5888 | 12.899326 | 9.9061183 | CIT          | 1.302157467 |
| 5889 | 3.3359619 | 2.5620489 | AMN1         | 1.30206799  |

|      |           |           |              |             |
|------|-----------|-----------|--------------|-------------|
| 5890 | 10.759757 | 8.265055  | ARHGAP31     | 1.30183729  |
| 5891 | 104.38909 | 80.20408  | DDX39A       | 1.301543385 |
| 5892 | 5.5978715 | 4.3054849 | CEP120       | 1.300172142 |
| 5893 | 4.0935616 | 3.1491851 | TMEM79       | 1.29987964  |
| 5894 | 11.369595 | 8.7466518 | RPA3         | 1.29987964  |
| 5895 | 17.736128 | 13.644438 | BAG2         | 1.29987964  |
| 5896 | 13.191467 | 10.150338 | ZNF532       | 1.299608607 |
| 5897 | 2.9192612 | 2.2471029 | DZIP1L       | 1.299122135 |
| 5898 | 21.625531 | 16.646264 | MED25        | 1.299122134 |
| 5899 | 19.424282 | 14.964848 | ZDHHC18      | 1.297993935 |
| 5900 | 20.04168  | 15.440503 | MID1IP1      | 1.297993935 |
| 5901 | 19.176892 | 14.775558 | LEPREL4      | 1.297879352 |
| 5902 | 33.438334 | 25.776058 | POLR2F       | 1.297263311 |
| 5903 | 2.5518306 | 1.9671928 | TTBK2        | 1.297193939 |
| 5904 | 124.48258 | 95.975165 | BRK1         | 1.297029027 |
| 5905 | 64.683049 | 49.872179 | DLGAP4       | 1.296976599 |
| 5906 | 24.905826 | 19.209371 | MOB3A        | 1.296545666 |
| 5907 | 31.504209 | 24.317717 | SBNO2        | 1.295524935 |
| 5908 | 77.237489 | 59.62143  | DVL1         | 1.295465211 |
| 5909 | 31.900618 | 24.629593 | ATP13A1      | 1.295215    |
| 5910 | 6.9709269 | 5.3833299 | NDST2        | 1.294909837 |
| 5911 | 15.872619 | 12.258527 | DHRS3        | 1.294822779 |
| 5912 | 8.069782  | 6.2334386 | NEDD1        | 1.294595577 |
| 5913 | 8.8740012 | 6.8550018 | TRIM32       | 1.294529384 |
| 5914 | 20.178364 | 15.595964 | BTBD10       | 1.293819596 |
| 5915 | 15.417414 | 11.920554 | EHMT1        | 1.293347092 |
| 5916 | 0.4164658 | 0.3222188 | PCED1B-AS1   | 1.292493963 |
| 5917 | 0.119208  | 0.092231  | GVINP1       | 1.292493963 |
| 5918 | 0.2608254 | 0.2018001 | POM121L1P    | 1.292493962 |
| 5919 | 0.3879365 | 0.3001457 | LOC387723    | 1.292493962 |
| 5920 | 0.8433812 | 0.6525224 | MASP2        | 1.292493962 |
| 5921 | 0.6757442 | 0.5228219 | ZHX1-C8ORF76 | 1.292493961 |
| 5922 | 0.8670668 | 0.6708478 | SYTL2        | 1.292493961 |
| 5923 | 0.8558501 | 0.6621695 | ZNF85        | 1.292493961 |
| 5924 | 1.5763956 | 1.2196541 | LINC00526    | 1.292493961 |
| 5925 | 41.314687 | 31.965091 | TUBGCP2      | 1.292493961 |
| 5926 | 0.6079332 | 0.4703567 | LOC100132707 | 1.292493961 |
| 5927 | 0.4992801 | 0.386292  | SLC25A18     | 1.292493961 |
| 5928 | 0.7960256 | 0.6158834 | ECEL1P2      | 1.292493961 |
| 5929 | 29.304419 | 22.67277  | GPN1         | 1.292493961 |
| 5930 | 2.2825794 | 1.7660271 | C17orf49     | 1.292493961 |
| 5931 | 5.141435  | 3.977918  | RGS16        | 1.292493961 |
| 5932 | 57.395956 | 44.407137 | PEF1         | 1.292493961 |

|      |           |           |              |             |
|------|-----------|-----------|--------------|-------------|
| 5933 | 3.3685264 | 2.6062222 | BCKDHB       | 1.29249396  |
| 5934 | 7.8394796 | 6.0653898 | C16orf55     | 1.29249396  |
| 5935 | 0.5445506 | 0.4213177 | LOC100132247 | 1.29249396  |
| 5936 | 7.4817053 | 5.7885805 | INIP         | 1.29249396  |
| 5937 | 1.519833  | 1.1758918 | CENPP        | 1.29249396  |
| 5938 | 5.4973489 | 4.2532879 | CXorf40A     | 1.29249396  |
| 5939 | 3.3204776 | 2.5690469 | PPM1K        | 1.29249396  |
| 5940 | 1.0698126 | 0.8277119 | PLEKHM1P     | 1.29249396  |
| 5941 | 2.1396253 | 1.6554238 | HIST1H2AM    | 1.29249396  |
| 5942 | 0.7594734 | 0.5876031 | HS3ST5       | 1.29249396  |
| 5943 | 11.036734 | 8.5390988 | MED19        | 1.29249396  |
| 5944 | 0.3772619 | 0.2918868 | CCDC121      | 1.29249396  |
| 5945 | 0.4387358 | 0.339449  | MTHFS        | 1.29249396  |
| 5946 | 0.861155  | 0.6662739 | C7orf55      | 1.29249396  |
| 5947 | 0.4641414 | 0.3591053 | CYP26A1      | 1.29249396  |
| 5948 | 1.0764437 | 0.8328423 | LOC400684    | 1.29249396  |
| 5949 | 0.5873718 | 0.4544484 | PAXBP1-AS1   | 1.29249396  |
| 5950 | 0.6104262 | 0.4722855 | FAM151B      | 1.29249396  |
| 5951 | 0.4540294 | 0.3512817 | FAM172BP     | 1.292493959 |
| 5952 | 0.6037065 | 0.4670866 | LOC100130451 | 1.292493959 |
| 5953 | 0.8520012 | 0.6591917 | ZNF182       | 1.292493959 |
| 5954 | 0.5134257 | 0.3972365 | TMEM254-AS1  | 1.292493959 |
| 5955 | 0.6136617 | 0.4747888 | LOC100288123 | 1.292493959 |
| 5956 | 0.1401288 | 0.1084173 | MYO16        | 1.292493959 |
| 5957 | 68.741729 | 53.21769  | PDZD11       | 1.29170825  |
| 5958 | 62.107    | 48.086782 | DGUOK        | 1.291560752 |
| 5959 | 256.32343 | 198.47078 | TNFRSF12A    | 1.291492027 |
| 5960 | 65.810368 | 50.976283 | TIMM10       | 1.290999748 |
| 5961 | 158.76988 | 122.99921 | MAZ          | 1.290820337 |
| 5962 | 5.480722  | 4.2468098 | DUSP16       | 1.290550361 |
| 5963 | 11.872456 | 9.2019825 | C6orf47      | 1.29020636  |
| 5964 | 29.643032 | 22.982141 | FAM3C        | 1.289829024 |
| 5965 | 14.934166 | 11.578408 | KIAA0146     | 1.289829024 |
| 5966 | 42.13096  | 32.670892 | SRF          | 1.289556474 |
| 5967 | 4.0441383 | 3.13709   | UGGT2        | 1.289136833 |
| 5968 | 11.032202 | 8.5590418 | RAB7L1       | 1.288952881 |
| 5969 | 16.083479 | 12.47993  | DHDDS        | 1.288747601 |
| 5970 | 7.0265933 | 5.452738  | ZNF865       | 1.28863577  |
| 5971 | 1.4623176 | 1.1351139 | DBT          | 1.288256276 |
| 5972 | 41.724765 | 32.398075 | TAF6         | 1.287877911 |
| 5973 | 2.0064722 | 1.5582839 | SAMD9        | 1.287616625 |
| 5974 | 42.554718 | 33.05356  | FBRS         | 1.287447347 |
| 5975 | 69.4665   | 53.959631 | NPTN         | 1.287379068 |

|      |           |           |            |             |
|------|-----------|-----------|------------|-------------|
| 5976 | 16.441952 | 12.773241 | ZDHHC9     | 1.287218474 |
| 5977 | 25.643909 | 19.923311 | B4GALT3    | 1.287130915 |
| 5978 | 16.406506 | 12.747166 | ITFG1      | 1.287070909 |
| 5979 | 17.688787 | 13.744955 | DLG5       | 1.286929407 |
| 5980 | 258.90989 | 201.20624 | COX6B1     | 1.286788555 |
| 5981 | 4.9894707 | 3.8775772 | PRELID2    | 1.286749543 |
| 5982 | 35.729137 | 27.786054 | TNPO2      | 1.285865787 |
| 5983 | 3.1013952 | 2.4133338 | SOCS6      | 1.285108281 |
| 5984 | 3.2568628 | 2.535193  | LZTS3      | 1.284660664 |
| 5985 | 9.8263026 | 7.6553865 | SERTAD3    | 1.283580209 |
| 5986 | 6.8144297 | 5.3116563 | SLC39A8    | 1.282919931 |
| 5987 | 26.536802 | 20.697047 | SLC41A1    | 1.282154009 |
| 5988 | 27.811321 | 21.696877 | MFAP2      | 1.281812193 |
| 5989 | 24.638654 | 19.222114 | NEO1       | 1.28178691  |
| 5990 | 36.84149  | 28.748858 | ETFB       | 1.281494012 |
| 5991 | 36.575759 | 28.54882  | ARGLU1     | 1.281165328 |
| 5992 | 47.518679 | 37.095229 | PAF1       | 1.280991672 |
| 5993 | 9.3371976 | 7.2894498 | GLIS2      | 1.280919388 |
| 5994 | 0.6339519 | 0.4952036 | ZNF555     | 1.280184492 |
| 5995 | 38.452626 | 30.049555 | TSR3       | 1.279640429 |
| 5996 | 7.1761915 | 5.6082879 | SLC35F5    | 1.279569021 |
| 5997 | 162.68529 | 127.20832 | DSTN       | 1.278888761 |
| 5998 | 1.8508648 | 1.4472446 | ZNF776     | 1.278888761 |
| 5999 | 250.45044 | 195.86623 | ATF4       | 1.278681048 |
| 6000 | 144.66567 | 113.14354 | WARS       | 1.278603044 |
| 6001 | 58.997662 | 46.143543 | TBC1D9B    | 1.278568099 |
| 6002 | 18.05035  | 14.118747 | ELMO2      | 1.278466894 |
| 6003 | 24.760337 | 19.368314 | ST6GALNAC4 | 1.278394026 |
| 6004 | 26.239445 | 20.526977 | STC2       | 1.27829073  |
| 6005 | 14.914733 | 11.67063  | PIGC       | 1.277971556 |
| 6006 | 9.2393867 | 7.2309201 | DCHS1      | 1.277760869 |
| 6007 | 116.08661 | 90.867749 | SRP9       | 1.277533735 |
| 6008 | 106.70054 | 83.521428 | AIP        | 1.277522988 |
| 6009 | 1.0003176 | 0.7831573 | ZNF41      | 1.277288149 |
| 6010 | 3.5493832 | 2.778843  | RRM2B      | 1.277288149 |
| 6011 | 3.7479785 | 2.9343249 | ARHGAP18   | 1.277288149 |
| 6012 | 18.642767 | 14.595584 | PCGF1      | 1.277288149 |
| 6013 | 8.873382  | 6.9499258 | SLC37A3    | 1.276759251 |
| 6014 | 76.292447 | 59.776024 | RBM42      | 1.276305147 |
| 6015 | 13.747599 | 10.772855 | RAB2B      | 1.276133277 |
| 6016 | 36.675871 | 28.741962 | RANBP3     | 1.276039212 |
| 6017 | 3.6997769 | 2.8995252 | GAS8       | 1.275994038 |
| 6018 | 22.063097 | 17.294782 | NAA60      | 1.275708325 |

|      |           |           |           |             |
|------|-----------|-----------|-----------|-------------|
| 6019 | 43.068559 | 33.769726 | PATL1     | 1.275360035 |
| 6020 | 3.2330321 | 2.535193  | TBXAS1    | 1.275260708 |
| 6021 | 2.9274038 | 2.2955336 | FAM171A2  | 1.275260708 |
| 6022 | 132.19928 | 103.67468 | HDLBP     | 1.275135603 |
| 6023 | 50.481867 | 39.603981 | PYCR2     | 1.274666458 |
| 6024 | 4.8001623 | 3.7664309 | LOC550112 | 1.274459161 |
| 6025 | 10.337083 | 8.1109569 | TMEM206   | 1.274459161 |
| 6026 | 47.204762 | 37.054505 | HP1BP3    | 1.273927749 |
| 6027 | 16.609411 | 13.038687 | UBFD1     | 1.273856117 |
| 6028 | 42.069432 | 33.02622  | SBDS      | 1.273819143 |
| 6029 | 4.3057748 | 3.3803601 | RFX2      | 1.273762164 |
| 6030 | 30.497488 | 23.944709 | THAP7     | 1.273662923 |
| 6031 | 32.441144 | 25.471333 | PRRC2B    | 1.273633534 |
| 6032 | 40.806369 | 32.042487 | ATXN10    | 1.273508174 |
| 6033 | 1.1219354 | 0.8816023 | FLJ10038  | 1.272609439 |
| 6034 | 11.341469 | 8.9119796 | TMEM60    | 1.272609438 |
| 6035 | 5.2045661 | 4.0896806 | RNF215    | 1.272609438 |
| 6036 | 0.78697   | 0.6183908 | ZBTB41    | 1.272609438 |
| 6037 | 69.746607 | 54.811623 | PPP5C     | 1.272478403 |
| 6038 | 12.002756 | 9.4395827 | WRB       | 1.271534599 |
| 6039 | 55.160183 | 43.384762 | SEC14L1   | 1.271418352 |
| 6040 | 2.877503  | 2.2640526 | ADM2      | 1.270952395 |
| 6041 | 3.3853443 | 2.6636279 | RASAL2    | 1.270952394 |
| 6042 | 8.5165944 | 6.7016875 | CDS2      | 1.270813417 |
| 6043 | 6.7580532 | 5.3198904 | HYI       | 1.270336921 |
| 6044 | 11.823075 | 9.3088694 | MECP2     | 1.270087089 |
| 6045 | 4.0897014 | 3.2206973 | CDH24     | 1.269818628 |
| 6046 | 194.767   | 153.39648 | ARF4      | 1.269696608 |
| 6047 | 19.005822 | 14.974697 | CCNL2     | 1.269195786 |
| 6048 | 7.428101  | 5.8535348 | MEF2BNB   | 1.26899407  |
| 6049 | 73.552765 | 57.975948 | SUPT4H1   | 1.268677218 |
| 6050 | 20.86865  | 16.455313 | OSBP      | 1.268201303 |
| 6051 | 39.811644 | 31.404467 | CDIPT     | 1.267706405 |
| 6052 | 2.3849363 | 1.8816393 | PDE7A     | 1.267477948 |
| 6053 | 52.895293 | 41.732713 | TMED4     | 1.267477948 |
| 6054 | 16.634698 | 13.127638 | SP2       | 1.267150942 |
| 6055 | 80.402917 | 63.46113  | ELOF1     | 1.266963216 |
| 6056 | 13.931208 | 10.998518 | TMEM199   | 1.266644082 |
| 6057 | 2.725267  | 2.151565  | LPL       | 1.266644081 |
| 6058 | 10.31705  | 8.1529233 | RBMS2     | 1.265441761 |
| 6059 | 9.0210287 | 7.130126  | USP33     | 1.265199057 |
| 6060 | 9.8419554 | 7.7808951 | SP140L    | 1.264887293 |
| 6061 | 79.907615 | 63.20037  | YWHAG     | 1.264353586 |

|      |           |           |          |             |
|------|-----------|-----------|----------|-------------|
| 6062 | 0.855052  | 0.6765873 | ZNF30    | 1.263771874 |
| 6063 | 1.4490484 | 1.146606  | RSG1     | 1.263771873 |
| 6064 | 14.780106 | 11.695233 | AVEN     | 1.263771873 |
| 6065 | 17.155431 | 13.574785 | TOR3A    | 1.263771873 |
| 6066 | 2.9439998 | 2.3295342 | GPATCH2  | 1.263771873 |
| 6067 | 44.2901   | 35.045961 | MRPS11   | 1.263771873 |
| 6068 | 1.77705   | 1.4061478 | ZFX      | 1.263771872 |
| 6069 | 1.6429991 | 1.3000757 | G2E3     | 1.263771872 |
| 6070 | 0.5983802 | 0.4734875 | DNM1P46  | 1.263771872 |
| 6071 | 20.762143 | 16.435912 | CNDP2    | 1.263218194 |
| 6072 | 12.498157 | 9.8946781 | SEMA4C   | 1.263119097 |
| 6073 | 146.52178 | 116.01704 | USMG5    | 1.262933271 |
| 6074 | 12.36961  | 9.7972261 | POM121C  | 1.262562522 |
| 6075 | 9.3710248 | 7.4257547 | NPR2     | 1.261962607 |
| 6076 | 7.5400824 | 5.9755392 | PRICKLE3 | 1.261824612 |
| 6077 | 29.066798 | 23.036939 | CERS5    | 1.261747408 |
| 6078 | 18.222179 | 14.442328 | LIMS1    | 1.261720295 |
| 6079 | 8.1646561 | 6.4723137 | STAP2    | 1.261474106 |
| 6080 | 24.294085 | 19.263966 | TMUB1    | 1.261115495 |
| 6081 | 73.856576 | 58.566258 | MRPL38   | 1.261077263 |
| 6082 | 7.4218628 | 5.8868702 | GNG2     | 1.260748495 |
| 6083 | 12.885055 | 10.220888 | TMEM245  | 1.260659133 |
| 6084 | 46.361012 | 36.78357  | CYSTM1   | 1.260372809 |
| 6085 | 19.501926 | 15.477657 | PITX1    | 1.260005041 |
| 6086 | 2.6459667 | 2.1006503 | IFT140   | 1.259594114 |
| 6087 | 13.943789 | 11.072637 | RYBP     | 1.259301508 |
| 6088 | 41.545593 | 32.992365 | DPYSL2   | 1.259248709 |
| 6089 | 21.160712 | 16.807229 | MAPK14   | 1.25902442  |
| 6090 | 27.528032 | 21.865608 | BAK1     | 1.258964828 |
| 6091 | 3.7309373 | 2.9639389 | POMZP3   | 1.258776727 |
| 6092 | 0.1953135 | 0.155186  | GRIA3    | 1.258576592 |
| 6093 | 35.797871 | 28.443215 | RNF25    | 1.258573305 |
| 6094 | 61.738866 | 49.055235 | SRSF4    | 1.258558139 |
| 6095 | 16.910258 | 13.437716 | SH3PXD2A | 1.258417555 |
| 6096 | 16.345059 | 12.990881 | PDE4A    | 1.258194769 |
| 6097 | 20.99426  | 16.690927 | BCL2L13  | 1.257824711 |
| 6098 | 4.4173234 | 3.5126097 | MORC3    | 1.257561692 |
| 6099 | 129.59189 | 103.11173 | RTN4     | 1.25681034  |
| 6100 | 5.7535166 | 4.5795138 | FAM167A  | 1.256359721 |
| 6101 | 20.913982 | 16.646492 | DCTN6    | 1.25635972  |
| 6102 | 109.96195 | 87.538639 | MEA1     | 1.256153281 |
| 6103 | 0.488055  | 0.3887133 | FOXO3B   | 1.255565563 |
| 6104 | 1.7223099 | 1.3717403 | ZNF77    | 1.255565562 |

|      |           |           |          |             |
|------|-----------|-----------|----------|-------------|
| 6105 | 2.5341856 | 2.0183618 | TAX1BP3  | 1.255565561 |
| 6106 | 36.7003   | 29.239292 | MPG      | 1.255170606 |
| 6107 | 62.144838 | 49.517264 | POLDIP2  | 1.255013568 |
| 6108 | 21.185364 | 16.881024 | TTC17    | 1.254980943 |
| 6109 | 59.602677 | 47.494659 | ARL2     | 1.254934307 |
| 6110 | 7.1899273 | 5.730556  | DTX3L    | 1.254664869 |
| 6111 | 9.9341826 | 7.9183282 | UBXN2A   | 1.254580804 |
| 6112 | 2.7781594 | 2.2148115 | DEPDC5   | 1.254354795 |
| 6113 | 78.791566 | 62.825372 | HSBP1    | 1.254136075 |
| 6114 | 31.89896  | 25.436094 | ZDHHC16  | 1.254082494 |
| 6115 | 225.97536 | 180.21361 | ATP5C1   | 1.253930618 |
| 6116 | 10.422051 | 8.3124934 | FOXRED2  | 1.253781581 |
| 6117 | 26.390503 | 21.053768 | TACC1    | 1.25348126  |
| 6118 | 47.925829 | 38.234689 | AP1M1    | 1.253464602 |
| 6119 | 1.9225046 | 1.5339204 | NOMO3    | 1.253327477 |
| 6120 | 1.6759107 | 1.3371691 | DTWD2    | 1.253327477 |
| 6121 | 3.0826207 | 2.4612826 | C7orf41  | 1.252444852 |
| 6122 | 15.038587 | 12.007987 | KRT80    | 1.252382079 |
| 6123 | 10.962208 | 8.7542994 | AKT3     | 1.252208435 |
| 6124 | 64.201815 | 51.279644 | SLC9A3R1 | 1.25199415  |
| 6125 | 25.360786 | 20.261424 | CENPW    | 1.251678362 |
| 6126 | 4.5261459 | 3.6160615 | H3F3AP4  | 1.251678362 |
| 6127 | 2.2366722 | 1.7869384 | FAM86FP  | 1.251678362 |
| 6128 | 9.8482743 | 7.8698098 | SUFU     | 1.251399281 |
| 6129 | 7.8984152 | 6.3118187 | CAMKK2   | 1.251369153 |
| 6130 | 12.793549 | 10.224336 | ANKFY1   | 1.251284008 |
| 6131 | 38.33727  | 30.642014 | FOXK2    | 1.251134154 |
| 6132 | 2.9406985 | 2.350666  | AMOT     | 1.2510065   |
| 6133 | 38.000647 | 30.378226 | ATG9A    | 1.250917232 |
| 6134 | 3.0118436 | 2.4079327 | MON2     | 1.250800607 |
| 6135 | 23.760198 | 18.999415 | ZDHHC4   | 1.250575238 |
| 6136 | 125.85    | 100.65148 | GNG5     | 1.250354255 |
| 6137 | 5.5146552 | 4.4115341 | CENPBD1  | 1.25005386  |
| 6138 | 1.5313762 | 1.2250482 | SHROOM3  | 1.25005386  |
| 6139 | 36.602015 | 29.291122 | ACBD6    | 1.249594161 |
| 6140 | 14.321293 | 11.462437 | TMEM171  | 1.249410828 |
| 6141 | 2.2309286 | 1.7855845 | EPOR     | 1.249410828 |
| 6142 | 17.285539 | 13.83877  | PHAX     | 1.249066164 |
| 6143 | 14.064698 | 11.262108 | CUTC     | 1.248851307 |
| 6144 | 29.395076 | 23.537691 | BRE      | 1.248851307 |
| 6145 | 21.945179 | 17.575054 | VPS18    | 1.248654984 |
| 6146 | 63.045227 | 50.528102 | PRCC     | 1.247726013 |
| 6147 | 514.8209  | 412.65528 | TUBA1B   | 1.247581043 |

|      |           |           |           |             |
|------|-----------|-----------|-----------|-------------|
| 6148 | 1.7662944 | 1.416027  | BTBD9     | 1.247359251 |
| 6149 | 22.68756  | 18.197117 | MESDC1    | 1.246766737 |
| 6150 | 16.427458 | 13.177892 | VTA1      | 1.246592306 |
| 6151 | 221.37532 | 177.65365 | GNB1      | 1.2461062   |
| 6152 | 69.127087 | 55.474896 | DNM2      | 1.246096741 |
| 6153 | 31.291487 | 25.11717  | NUP85     | 1.245820567 |
| 6154 | 28.187857 | 22.651744 | MYO9B     | 1.244401162 |
| 6155 | 12.184329 | 9.7942766 | RTCA      | 1.244025437 |
| 6156 | 17.043577 | 13.703702 | GBE1      | 1.243720604 |
| 6157 | 3.1641286 | 2.5447147 | KIF3A     | 1.243411911 |
| 6158 | 19.364555 | 15.574731 | AGPAT6    | 1.243331614 |
| 6159 | 152.52427 | 122.6813  | MRPL51    | 1.243256095 |
| 6160 | 6.3489977 | 5.1086951 | TRPM4     | 1.242782654 |
| 6161 | 27.332258 | 21.993345 | FAM104A   | 1.242751291 |
| 6162 | 13.634542 | 10.972519 | MUM1      | 1.242608229 |
| 6163 | 6.5549425 | 5.2790183 | IRS1      | 1.241697255 |
| 6164 | 26.330769 | 21.206414 | IP6K2     | 1.241641739 |
| 6165 | 96.899131 | 78.05165  | FIS1      | 1.241474462 |
| 6166 | 0.3726966 | 0.3003694 | GCSAM     | 1.240794203 |
| 6167 | 0.2292203 | 0.1847368 | SLC6A20   | 1.240794203 |
| 6168 | 0.5317444 | 0.4285517 | ZNF417    | 1.240794203 |
| 6169 | 2.3908164 | 1.9268437 | RPL23P8   | 1.240794202 |
| 6170 | 0.6654588 | 0.5363168 | MAP2K6    | 1.240794202 |
| 6171 | 19.877621 | 16.020079 | PANK4     | 1.240794202 |
| 6172 | 0.442932  | 0.3569746 | DPPA4     | 1.240794202 |
| 6173 | 21.470431 | 17.303781 | TFPT      | 1.240794202 |
| 6174 | 4.0353138 | 3.2522023 | PCNXL2    | 1.240794202 |
| 6175 | 5.1883693 | 4.1814906 | LINC00869 | 1.240794202 |
| 6176 | 3.5314276 | 2.8461026 | GANC      | 1.240794202 |
| 6177 | 7.3408826 | 5.9162773 | EPS8      | 1.240794202 |
| 6178 | 0.8805613 | 0.7096755 | LOC728407 | 1.240794202 |
| 6179 | 11.524396 | 9.2879192 | SNORD3A   | 1.240794202 |
| 6180 | 0.8220888 | 0.6625505 | LOC338799 | 1.240794202 |
| 6181 | 1.0035289 | 0.8087795 | PRDM5     | 1.240794202 |
| 6182 | 0.9791676 | 0.7891458 | LINC00260 | 1.240794201 |
| 6183 | 0.1346685 | 0.1085341 | PDE11A    | 1.240794201 |
| 6184 | 15.948212 | 12.864756 | ZNF706    | 1.23968238  |
| 6185 | 18.590904 | 14.997686 | TRAF2     | 1.239584851 |
| 6186 | 7.1505884 | 5.769076  | LRRC14    | 1.239468567 |
| 6187 | 17.430173 | 14.065153 | LRRFIP2   | 1.239245146 |
| 6188 | 22.047656 | 17.791623 | HMG3      | 1.239215584 |
| 6189 | 6.2863565 | 5.0736871 | MAMLD1    | 1.239011452 |
| 6190 | 157.20811 | 126.97973 | TALDO1    | 1.23805679  |



|      |           |           |           |             |
|------|-----------|-----------|-----------|-------------|
| 6191 | 18.709706 | 15.1127   | CCHCR1    | 1.238012152 |
| 6192 | 9.9023521 | 7.9987942 | EIF4ENIF1 | 1.23798061  |
| 6193 | 25.190147 | 20.353029 | FBXW11    | 1.237660883 |
| 6194 | 17.855826 | 14.430069 | FDX1L     | 1.237404054 |
| 6195 | 18.992714 | 15.348837 | POP5      | 1.237404054 |
| 6196 | 8.8795946 | 7.1765387 | RABGAP1   | 1.237308825 |
| 6197 | 19.434674 | 15.711286 | SNX2      | 1.236988085 |
| 6198 | 2.8013155 | 2.2650816 | SIRT5     | 1.236739319 |
| 6199 | 61.133219 | 49.432571 | SLC35B2   | 1.236699172 |
| 6200 | 36.517133 | 29.531935 | RAB1A     | 1.236530304 |
| 6201 | 4.8243382 | 3.9025055 | SZT2      | 1.236215626 |
| 6202 | 205.49472 | 166.25176 | CAP1      | 1.236045351 |
| 6203 | 5.2555715 | 4.2529396 | CDKN1C    | 1.235750323 |
| 6204 | 8.4127925 | 6.8096464 | PQLC2     | 1.235422799 |
| 6205 | 66.393943 | 53.746093 | NDUFB4    | 1.235325958 |
| 6206 | 21.725044 | 17.586801 | RAD51C    | 1.235303963 |
| 6207 | 15.670142 | 12.693888 | TXNDC9    | 1.234463619 |
| 6208 | 58.35186  | 47.278342 | HES1      | 1.234219666 |
| 6209 | 121.73088 | 98.637535 | TGFB1     | 1.234123266 |
| 6210 | 5.7823633 | 4.6854018 | ANKS3     | 1.234123266 |
| 6211 | 12.486133 | 10.12052  | SNX14     | 1.233744236 |
| 6212 | 47.486865 | 38.49004  | MAP1LC3B  | 1.233744235 |
| 6213 | 7.6497522 | 6.2014722 | PILRB     | 1.233538096 |
| 6214 | 6.7062815 | 5.4396997 | ACOX3     | 1.232840393 |
| 6215 | 8.5341935 | 6.9223831 | CABLES2   | 1.232840393 |
| 6216 | 18.440679 | 14.95788  | ZMAT5     | 1.232840393 |
| 6217 | 22.696975 | 18.420215 | ABCF3     | 1.232177576 |
| 6218 | 24.466189 | 19.859012 | TMEM223   | 1.231994244 |
| 6219 | 5.9940277 | 4.865305  | SLC38A6   | 1.231994243 |
| 6220 | 13.480043 | 10.943344 | MCOLN1    | 1.23180294  |
| 6221 | 159.73898 | 129.72487 | UQCRC1    | 1.231367466 |
| 6222 | 105.8307  | 85.964538 | CTSA      | 1.231097204 |
| 6223 | 1.450442  | 1.1783143 | TOB2P1    | 1.23094663  |
| 6224 | 3.1914165 | 2.5926522 | ZNF785    | 1.230946629 |
| 6225 | 1.2337171 | 1.0022507 | ZNF365    | 1.230946629 |
| 6226 | 5.7499514 | 4.6730315 | ZNF516    | 1.23045425  |
| 6227 | 41.863917 | 34.036226 | RBX1      | 1.229981181 |
| 6228 | 57.959779 | 47.124002 | DRG1      | 1.229941775 |
| 6229 | 27.59909  | 22.44143  | SMG9      | 1.229827587 |
| 6230 | 25.693603 | 20.894809 | OSMR      | 1.229664393 |
| 6231 | 12.287514 | 9.9947585 | PCYOX1L   | 1.229395831 |
| 6232 | 106.62498 | 86.742111 | GHITM     | 1.229218166 |
| 6233 | 18.626736 | 15.155973 | TIPRL     | 1.229003029 |

|      |           |           |              |             |
|------|-----------|-----------|--------------|-------------|
| 6234 | 100.58271 | 81.88406  | SART1        | 1.228355162 |
| 6235 | 0.8446225 | 0.6878766 | RHBDL3       | 1.227869264 |
| 6236 | 2.3020875 | 1.8748637 | C12orf73     | 1.227869263 |
| 6237 | 26.018815 | 21.190216 | NCAPH2       | 1.227869263 |
| 6238 | 6.3727315 | 5.1900733 | CLP1         | 1.227869263 |
| 6239 | 2.6681877 | 2.1730226 | LOC100506083 | 1.227869263 |
| 6240 | 1.2961016 | 1.0555697 | ULK2         | 1.227869262 |
| 6241 | 1.6436656 | 1.3386324 | FLJ14186     | 1.227869262 |
| 6242 | 28.77194  | 23.442445 | EIF2D        | 1.227343859 |
| 6243 | 211.70924 | 172.51878 | PHB          | 1.22716637  |
| 6244 | 12.938328 | 10.546628 | CAMLG        | 1.226773929 |
| 6245 | 10.58603  | 8.6320293 | C11orf49     | 1.226366363 |
| 6246 | 63.253511 | 51.58551  | MPV17        | 1.226187579 |
| 6247 | 26.935648 | 21.967598 | NXF1         | 1.226153563 |
| 6248 | 44.102555 | 35.970062 | CBX1         | 1.226090601 |
| 6249 | 37.587739 | 30.662078 | TXNDC12      | 1.225870561 |
| 6250 | 5.2170856 | 4.2561194 | CAMK2D       | 1.225784595 |
| 6251 | 1.315342  | 1.0733317 | ERO1LB       | 1.225475756 |
| 6252 | 2.7230641 | 2.2220465 | ATP2A3       | 1.225475755 |
| 6253 | 2.6771513 | 2.1845812 | ACTR6        | 1.225475755 |
| 6254 | 10.64264  | 8.6867779 | C17orf53     | 1.22515394  |
| 6255 | 21.123873 | 17.244148 | PIAS4        | 1.224987907 |
| 6256 | 15.422164 | 12.590687 | PEX11B       | 1.224886585 |
| 6257 | 8.5778472 | 7.0038557 | SPHK2        | 1.224732141 |
| 6258 | 2.2990874 | 1.8776215 | DFNB31       | 1.224467963 |
| 6259 | 26.566509 | 21.696369 | CLCN7        | 1.224467962 |
| 6260 | 1.8853996 | 1.5397704 | ADAMTS16     | 1.224467962 |
| 6261 | 7.1300563 | 5.8250823 | ROCK2        | 1.224026713 |
| 6262 | 2.3287103 | 1.9026769 | FBXL20       | 1.223912648 |
| 6263 | 17.344216 | 14.173365 | NDUFA5       | 1.223719052 |
| 6264 | 103.75331 | 84.798623 | MTCH1        | 1.223525851 |
| 6265 | 13.344573 | 10.907295 | FAM20B       | 1.223453911 |
| 6266 | 27.687612 | 22.638233 | WBSCR16      | 1.223046524 |
| 6267 | 15.371853 | 12.573627 | TSKU         | 1.222547229 |
| 6268 | 15.858762 | 12.972573 | ATG13        | 1.222483871 |
| 6269 | 96.602685 | 79.041404 | ATP5J        | 1.222178242 |
| 6270 | 17.209554 | 14.081138 | MLLT4        | 1.222170649 |
| 6271 | 1.8213066 | 1.4904379 | ZNF766       | 1.22199429  |
| 6272 | 16.749264 | 13.7065   | C1D          | 1.22199429  |
| 6273 | 9.8373039 | 8.0502045 | MRPL1        | 1.22199429  |
| 6274 | 15.065024 | 12.3357   | PHACTR4      | 1.221254136 |
| 6275 | 11.105087 | 9.0943378 | SELO         | 1.221099057 |
| 6276 | 11.469056 | 9.3955617 | ZNF346       | 1.220688741 |

|      |           |           |          |             |
|------|-----------|-----------|----------|-------------|
| 6277 | 8.1015127 | 6.6368374 | PDP1     | 1.220688741 |
| 6278 | 58.616537 | 48.027598 | RER1     | 1.220476127 |
| 6279 | 18.763773 | 15.374429 | TMEM189  | 1.220453313 |
| 6280 | 84.445623 | 69.206951 | CIZ1     | 1.220189911 |
| 6281 | 5.7179835 | 4.6864327 | OCLN     | 1.220114299 |
| 6282 | 23.016726 | 18.866351 | PDHA1    | 1.219988202 |
| 6283 | 79.066142 | 64.819408 | CLPP     | 1.219791175 |
| 6284 | 16.198573 | 13.280551 | PRKCA    | 1.219721416 |
| 6285 | 21.816543 | 17.89322  | VEZF1    | 1.219263068 |
| 6286 | 9.0908672 | 7.4564913 | FAM110A  | 1.219188333 |
| 6287 | 6.1961094 | 5.0828366 | SGMS1    | 1.219025883 |
| 6288 | 218.74811 | 179.46041 | NDUFS5   | 1.218921227 |
| 6289 | 10.745977 | 8.8162587 | FOXC1    | 1.218881721 |
| 6290 | 12.763531 | 10.476754 | NAT9     | 1.218271535 |
| 6291 | 2.9886166 | 2.4531613 | CASK     | 1.218271535 |
| 6292 | 7.1746826 | 5.8899091 | ZNF174   | 1.218131294 |
| 6293 | 19.899258 | 16.34577  | PDXDC1   | 1.217394923 |
| 6294 | 19.245549 | 15.809201 | RIPK2    | 1.21736377  |
| 6295 | 7.7125241 | 6.3354309 | CEP104   | 1.21736377  |
| 6296 | 11.78312  | 9.6826386 | CLASP1   | 1.216932775 |
| 6297 | 7.467242  | 6.1361171 | STX7     | 1.216932775 |
| 6298 | 1.7102954 | 1.4059554 | CHRNB1   | 1.216464904 |
| 6299 | 5.7121837 | 4.6957242 | TMEM70   | 1.216464904 |
| 6300 | 7.0795613 | 5.8237176 | HOXA1    | 1.215642968 |
| 6301 | 79.65492  | 65.540374 | ECHS1    | 1.215356508 |
| 6302 | 17.140574 | 14.105688 | KANSL3   | 1.215153352 |
| 6303 | 1.5571982 | 1.2817033 | KLHL15   | 1.214944323 |
| 6304 | 101.93743 | 83.913918 | SF3B14   | 1.214785735 |
| 6305 | 584.50706 | 481.16561 | CLIC1    | 1.214773132 |
| 6306 | 60.868041 | 50.113417 | NPC2     | 1.214605678 |
| 6307 | 7.2130791 | 5.9389684 | ALKBH4   | 1.214534007 |
| 6308 | 419.48226 | 345.42821 | RPS26    | 1.214383307 |
| 6309 | 97.8993   | 80.619139 | EMC7     | 1.214343163 |
| 6310 | 9.3216783 | 7.676313  | OGG1     | 1.214343163 |
| 6311 | 12.987464 | 10.695052 | ERP44    | 1.214343163 |
| 6312 | 6.8639869 | 5.6532758 | SIK1     | 1.214160993 |
| 6313 | 30.702111 | 25.290586 | SYPL1    | 1.21397385  |
| 6314 | 4.2085165 | 3.4671657 | KLC4     | 1.213820415 |
| 6315 | 17.727055 | 14.610893 | METTL13  | 1.213276589 |
| 6316 | 40.55968  | 33.435648 | NSMCE1   | 1.213066957 |
| 6317 | 3.9223602 | 3.2337205 | ZFPM1    | 1.212955871 |
| 6318 | 2.332117  | 1.9226725 | C21orf91 | 1.212955871 |
| 6319 | 221.72253 | 182.80602 | H3F3B    | 1.2128842   |

|      |           |           |          |             |
|------|-----------|-----------|----------|-------------|
| 6320 | 172.62944 | 142.33426 | EIF4H    | 1.212845278 |
| 6321 | 25.74691  | 21.23542  | DLC1     | 1.212451187 |
| 6322 | 9.7822131 | 8.069334  | ZNF579   | 1.212270198 |
| 6323 | 4.8103075 | 3.968016  | ZNF771   | 1.212270197 |
| 6324 | 2.6184712 | 2.1599732 | MFSD9    | 1.212270197 |
| 6325 | 19.477862 | 16.071136 | COQ5     | 1.211977944 |
| 6326 | 12.126604 | 10.005631 | RNF157   | 1.211977943 |
| 6327 | 42.607101 | 35.157004 | KIAA2013 | 1.211909317 |
| 6328 | 3.034355  | 2.504186  | ZNF271   | 1.211713088 |
| 6329 | 22.069212 | 18.215087 | HSD17B4  | 1.211589758 |
| 6330 | 84.550654 | 69.79314  | STRA13   | 1.211446484 |
| 6331 | 7.3563319 | 6.0733316 | C11orf80 | 1.211251483 |
| 6332 | 10.747647 | 8.8731757 | DOM3Z    | 1.211251483 |
| 6333 | 11.023454 | 9.1056681 | AKAP13   | 1.210614575 |
| 6334 | 8.8133709 | 7.280583  | FAM92A1  | 1.210530929 |
| 6335 | 7.2251181 | 5.9685531 | C19orf54 | 1.210530929 |
| 6336 | 72.011377 | 59.506986 | LONP1    | 1.210133147 |
| 6337 | 5.6996382 | 4.7104668 | LOC96610 | 1.209994346 |
| 6338 | 22.611717 | 18.692904 | SCMH1    | 1.209641784 |
| 6339 | 3.2644692 | 2.6988469 | SPAG1    | 1.209579254 |
| 6340 | 5.6869582 | 4.7016003 | ZNF641   | 1.209579254 |
| 6341 | 4.6422862 | 3.8405521 | GULP1    | 1.208754915 |
| 6342 | 3.337931  | 2.7614622 | IGF2     | 1.208754915 |
| 6343 | 5.0612798 | 4.1884004 | VPS54    | 1.208403992 |
| 6344 | 30.819644 | 25.51531  | NF2      | 1.207888276 |
| 6345 | 7.7911594 | 6.4508321 | DGAT1    | 1.207775869 |
| 6346 | 54.330451 | 44.993862 | C16orf80 | 1.207508056 |
| 6347 | 11.08237  | 9.1780652 | GOLT1B   | 1.207484291 |
| 6348 | 56.655055 | 46.945229 | FAM32A   | 1.206833071 |
| 6349 | 1.4351171 | 1.1896577 | DDX60    | 1.206327697 |
| 6350 | 0.7817773 | 0.6480638 | ADTRP    | 1.206327697 |
| 6351 | 14.835219 | 12.297835 | CENPT    | 1.206327697 |
| 6352 | 0.9242639 | 0.7661798 | FAM21A   | 1.206327697 |
| 6353 | 1.5691608 | 1.3007749 | ZNF720   | 1.206327697 |
| 6354 | 2.9195394 | 2.4201876 | PEX7     | 1.206327697 |
| 6355 | 8.0994254 | 6.7141171 | ARRDC1   | 1.206327697 |
| 6356 | 2.4510723 | 2.0318461 | PPFIBP2  | 1.206327697 |
| 6357 | 40.931439 | 33.930614 | ATP5SL   | 1.206327697 |
| 6358 | 1.3560109 | 1.1240817 | PIK3CG   | 1.206327697 |
| 6359 | 3.5609353 | 2.9518806 | C5orf45  | 1.206327696 |
| 6360 | 4.4205955 | 3.6645063 | SCARNA7  | 1.206327696 |
| 6361 | 0.3700651 | 0.3067699 | FLJ12825 | 1.206327696 |
| 6362 | 34.808593 | 28.855006 | ZCRB1    | 1.206327696 |

|      |           |           |          |             |
|------|-----------|-----------|----------|-------------|
| 6363 | 2.3787958 | 1.9719316 | DUSP18   | 1.206327696 |
| 6364 | 0.4820078 | 0.3995662 | AP3S2    | 1.206327696 |
| 6365 | 0.9699445 | 0.8040473 | KBTBD7   | 1.206327696 |
| 6366 | 0.2107174 | 0.1746767 | NALCN    | 1.206327692 |
| 6367 | 105.45358 | 87.43526  | NFKBIA   | 1.206076116 |
| 6368 | 33.780722 | 28.03114  | GOLGA7   | 1.205114087 |
| 6369 | 12.126505 | 10.064598 | AMMECR1L | 1.204867251 |
| 6370 | 57.008024 | 47.315515 | EPHA2    | 1.204848447 |
| 6371 | 19.699047 | 16.352444 | INTS10   | 1.204654566 |
| 6372 | 50.941283 | 42.294456 | COPA     | 1.204443489 |
| 6373 | 6.8909654 | 5.7219663 | TMEM241  | 1.204300255 |
| 6374 | 3.9958606 | 3.319495  | NR2C1    | 1.203755569 |
| 6375 | 57.84571  | 48.076779 | PDHB     | 1.203194378 |
| 6376 | 36.321967 | 30.192765 | ABL1     | 1.203002325 |
| 6377 | 76.202291 | 63.387308 | MMP14    | 1.202169539 |
| 6378 | 90.254129 | 75.084163 | RRM2     | 1.202039484 |
| 6379 | 16.232122 | 13.504043 | SNAP47   | 1.202019383 |
| 6380 | 73.214539 | 60.921575 | ELOVL1   | 1.201783431 |
| 6381 | 2.1030694 | 1.7501221 | LYSMD3   | 1.201670061 |
| 6382 | 7.0659058 | 5.8820831 | SLFN5    | 1.201259093 |
| 6383 | 268.64571 | 223.63806 | HMGN2    | 1.201252203 |
| 6384 | 13.231714 | 11.019371 | GLRX2    | 1.200768583 |
| 6385 | 4.221937  | 3.5160288 | PPOX     | 1.200768583 |
| 6386 | 162.74539 | 135.55641 | RPN2     | 1.200573183 |
| 6387 | 29.332575 | 24.432292 | CERCAM   | 1.200565819 |
| 6388 | 0.652655  | 0.5441357 | ACACB    | 1.199434396 |
| 6389 | 1.273943  | 1.0621198 | TMEM67   | 1.199434396 |
| 6390 | 133.83827 | 111.62131 | SF1      | 1.199038707 |
| 6391 | 4.4639564 | 3.7257965 | NAIF1    | 1.198121386 |
| 6392 | 227.27241 | 189.72234 | PRMT1    | 1.197921232 |
| 6393 | 36.677188 | 30.624038 | TBCD     | 1.197660084 |
| 6394 | 160.87559 | 134.36523 | CCNI     | 1.197300755 |
| 6395 | 34.658232 | 28.948017 | TRA2A    | 1.197257564 |
| 6396 | 2.6764676 | 2.2354986 | ZNF329   | 1.197257563 |
| 6397 | 62.341731 | 52.076465 | PAIP2    | 1.197119088 |
| 6398 | 4.8815383 | 4.0799159 | TRIM4    | 1.196480124 |
| 6399 | 5.5679256 | 4.6540629 | MED23    | 1.196358046 |
| 6400 | 55.33366  | 46.260443 | XPO6     | 1.196133378 |
| 6401 | 27.94284  | 23.362813 | DERL2    | 1.196039188 |
| 6402 | 114.89037 | 96.062415 | UBE2M    | 1.195997136 |
| 6403 | 380.97682 | 318.55454 | PSMB4    | 1.19595474  |
| 6404 | 10.659702 | 8.913664  | SUZ12    | 1.195883301 |
| 6405 | 3.9280599 | 3.2855482 | KHDRBS3  | 1.195556914 |

|      |           |           |          |             |
|------|-----------|-----------|----------|-------------|
| 6406 | 11.808241 | 9.8767705 | C11orf83 | 1.195556913 |
| 6407 | 15.121592 | 12.651543 | BCOR     | 1.195236989 |
| 6408 | 7.3050632 | 6.1123215 | ARRDC2   | 1.195137273 |
| 6409 | 41.351114 | 34.610462 | LYPLA2   | 1.194757668 |
| 6410 | 13.165454 | 11.024574 | CCDC109B | 1.194191604 |
| 6411 | 32.430083 | 27.160459 | TMEM222  | 1.19401823  |
| 6412 | 12.135156 | 10.163688 | MFHAS1   | 1.193971779 |
| 6413 | 34.497059 | 28.895885 | UBR4     | 1.193839832 |
| 6414 | 66.089656 | 55.363452 | SERINC3  | 1.193741613 |
| 6415 | 3.6787202 | 3.0834034 | ALDH4A1  | 1.193071348 |
| 6416 | 11.885903 | 9.9624411 | C6orf57  | 1.193071348 |
| 6417 | 13.951977 | 11.69627  | KDM5B    | 1.19285696  |
| 6418 | 37.934157 | 31.812945 | CACYBP   | 1.192412648 |
| 6419 | 7.5502224 | 6.3326993 | BICC1    | 1.192259735 |
| 6420 | 3.5043155 | 2.9395276 | FAM160B1 | 1.192135606 |
| 6421 | 23.92406  | 20.068863 | MBD1     | 1.192098405 |
| 6422 | 6.7353451 | 5.6517695 | THAP3    | 1.191723245 |
| 6423 | 2.3681761 | 1.9871863 | GCNT1    | 1.191723245 |
| 6424 | 33.283119 | 27.930801 | STXBP1   | 1.191627826 |
| 6425 | 6.5894081 | 5.530388  | PHKG2    | 1.191491121 |
| 6426 | 26.300257 | 22.078592 | DPM2     | 1.191210808 |
| 6427 | 528.98137 | 444.26992 | RPL23A   | 1.190675623 |
| 6428 | 107.29863 | 90.123891 | SZRD1    | 1.190568071 |
| 6429 | 4.0581335 | 3.409346  | KLHL29   | 1.190296764 |
| 6430 | 4.0653564 | 3.4160652 | TMEM50B  | 1.190069911 |
| 6431 | 5.2286613 | 4.3945618 | MRS2     | 1.18980266  |
| 6432 | 8.4486284 | 7.1008653 | TSPYL4   | 1.18980266  |
| 6433 | 2.9605859 | 2.4897819 | NKX2-4   | 1.189094444 |
| 6434 | 23.938888 | 20.138927 | NIT2     | 1.188687359 |
| 6435 | 3.0555452 | 2.5720198 | KLHL25   | 1.187994449 |
| 6436 | 35.35073  | 29.759411 | STAT6    | 1.187884081 |
| 6437 | 15.064199 | 12.681588 | TBC1D2B  | 1.187879567 |
| 6438 | 34.633728 | 29.1638   | COPB1    | 1.187558807 |
| 6439 | 55.610988 | 46.839013 | SDC1     | 1.187279238 |
| 6440 | 1.0122821 | 0.8526781 | ZNF250   | 1.187179638 |
| 6441 | 87.031087 | 73.309113 | MRPS15   | 1.187179638 |
| 6442 | 21.483713 | 18.098765 | ACAD9    | 1.187026453 |
| 6443 | 26.127172 | 22.024288 | LOXL1    | 1.186289031 |
| 6444 | 4.3117138 | 3.6353458 | GATA6    | 1.186053282 |
| 6445 | 2.8420181 | 2.3967614 | SSH2     | 1.185774276 |
| 6446 | 40.08152  | 33.807645 | NFKB2    | 1.185575612 |
| 6447 | 7.8569484 | 6.6278814 | SMIM12   | 1.185438905 |
| 6448 | 8.7258588 | 7.3616586 | HDHD2    | 1.185311535 |

|      |           |           |              |             |
|------|-----------|-----------|--------------|-------------|
| 6449 | 16.613978 | 14.018844 | MED18        | 1.185117539 |
| 6450 | 49.521554 | 41.788504 | HDGFRP2      | 1.185052076 |
| 6451 | 27.045711 | 22.827505 | TMEM248      | 1.18478613  |
| 6452 | 112.08627 | 94.631642 | HGS          | 1.184448103 |
| 6453 | 26.452321 | 22.334046 | PPCS         | 1.184394466 |
| 6454 | 4.6590378 | 3.9336876 | TFB1M        | 1.184394466 |
| 6455 | 32.8016   | 27.704898 | NFE2L2       | 1.183963934 |
| 6456 | 5.8840459 | 4.970265  | BLOC1S2      | 1.183849541 |
| 6457 | 34.728703 | 29.339077 | TNS3         | 1.183701303 |
| 6458 | 13.286815 | 11.22926  | DERA         | 1.183231584 |
| 6459 | 21.641487 | 18.294343 | NECAP1       | 1.182960574 |
| 6460 | 36.723176 | 31.054464 | NREP         | 1.182540953 |
| 6461 | 14.14774  | 11.964318 | ZNF574       | 1.182494475 |
| 6462 | 18.456296 | 15.610078 | CHMP1B       | 1.182332028 |
| 6463 | 11.324722 | 9.5833442 | C12orf23     | 1.181708764 |
| 6464 | 0.7830888 | 0.6626749 | LOC100128288 | 1.181708764 |
| 6465 | 3.8414654 | 3.2507717 | D2HGDH       | 1.181708764 |
| 6466 | 9.4987591 | 8.0381558 | RAB18        | 1.181708764 |
| 6467 | 2.2744829 | 1.9247407 | TPM3P9       | 1.181708764 |
| 6468 | 11.139394 | 9.426514  | C1orf86      | 1.181708764 |
| 6469 | 2.9665409 | 2.5103824 | SLC46A3      | 1.181708764 |
| 6470 | 0.7273979 | 0.6155475 | LSR          | 1.181708764 |
| 6471 | 1.3515979 | 1.1437657 | SENP7        | 1.181708763 |
| 6472 | 1.3106887 | 1.109147  | CCDC107      | 1.181708763 |
| 6473 | 0.7668795 | 0.6489581 | EGLN2        | 1.181708762 |
| 6474 | 20.832679 | 17.651259 | PIP4K2B      | 1.180237513 |
| 6475 | 4.5691004 | 3.871408  | TP73         | 1.180216707 |
| 6476 | 228.24707 | 193.44328 | C19orf43     | 1.179917309 |
| 6477 | 23.227997 | 19.68783  | AKR1A1       | 1.179815    |
| 6478 | 71.991074 | 61.039305 | SH3GL1       | 1.179421586 |
| 6479 | 7.6486493 | 6.4851997 | NUF2         | 1.179400739 |
| 6480 | 5.9964442 | 5.0855366 | CYB5R4       | 1.179117297 |
| 6481 | 17.79147  | 15.093448 | IL13RA1      | 1.178754492 |
| 6482 | 4.8502599 | 4.1174761 | ZNF628       | 1.177969179 |
| 6483 | 29.307928 | 24.88245  | GLOD4        | 1.177855366 |
| 6484 | 27.889609 | 23.685141 | UBE2O        | 1.177515003 |
| 6485 | 14.24606  | 12.10468  | CREG1        | 1.17690507  |
| 6486 | 5.3868278 | 4.5782409 | C12orf4      | 1.176615192 |
| 6487 | 2.2640933 | 1.9242428 | HERC2P2      | 1.176615191 |
| 6488 | 17.753834 | 15.090937 | SLC39A3      | 1.176456725 |
| 6489 | 7.0039473 | 5.9548791 | MIA3         | 1.176169504 |
| 6490 | 18.567083 | 15.789463 | ARMCX6       | 1.175916074 |
| 6491 | 30.100232 | 25.603979 | IMPAD1       | 1.17560755  |

|      |           |           |              |             |
|------|-----------|-----------|--------------|-------------|
| 6492 | 17.760953 | 15.108252 | TMEM63B      | 1.175579569 |
| 6493 | 22.060639 | 18.775099 | STARD3       | 1.17499451  |
| 6494 | 2.7816271 | 2.3673533 | IL17D        | 1.17499451  |
| 6495 | 5.620267  | 4.7832283 | LETM2        | 1.17499451  |
| 6496 | 38.557302 | 32.825382 | UBE2V2       | 1.174618511 |
| 6497 | 12.390836 | 10.550652 | NLGN2        | 1.174414266 |
| 6498 | 8.0912304 | 6.8908574 | EHBPI        | 1.174197903 |
| 6499 | 30.135467 | 25.664726 | SMIM7        | 1.174197903 |
| 6500 | 37.390439 | 31.847497 | HADHB        | 1.174046387 |
| 6501 | 83.399723 | 71.043686 | USP22        | 1.173921689 |
| 6502 | 3.5754816 | 3.0462706 | COX19        | 1.173724245 |
| 6503 | 23.955891 | 20.41401  | APOPT1       | 1.173502453 |
| 6504 | 161.94901 | 138.00766 | ATOX1        | 1.173478388 |
| 6505 | 38.616032 | 32.908558 | HIGD1A       | 1.173434351 |
| 6506 | 3.3229271 | 2.8329101 | NSL1         | 1.172973014 |
| 6507 | 2.4400496 | 2.0803737 | GNAL         | 1.172890042 |
| 6508 | 18.105739 | 15.439973 | SERPINB8     | 1.172653524 |
| 6509 | 6.738373  | 5.7466611 | C1orf52      | 1.172571841 |
| 6510 | 20.184772 | 17.217012 | RBM5         | 1.172373704 |
| 6511 | 17.998598 | 15.353232 | ASL          | 1.172300255 |
| 6512 | 0.4431259 | 0.3781386 | DOPEY1       | 1.171861192 |
| 6513 | 2.5828371 | 2.2040469 | LIG4         | 1.171861191 |
| 6514 | 1.0816033 | 0.922979  | NAIP         | 1.171861191 |
| 6515 | 4.1614622 | 3.5511563 | PRKAR1B      | 1.171861191 |
| 6516 | 2.629484  | 2.2438528 | ZNF70        | 1.171861191 |
| 6517 | 8.33598   | 7.1134534 | CCDC174      | 1.171861191 |
| 6518 | 1.3491209 | 1.1512634 | SPRY1        | 1.171861191 |
| 6519 | 1735.3617 | 1481.4971 | TUBB         | 1.171356802 |
| 6520 | 50.935632 | 43.490422 | MRPS7        | 1.171191938 |
| 6521 | 5.4460809 | 4.6506731 | IMPA1        | 1.171030673 |
| 6522 | 8.4777903 | 7.2407299 | CD109        | 1.17084747  |
| 6523 | 5.8897645 | 5.031576  | LOC100506190 | 1.170560568 |
| 6524 | 13.629384 | 11.649848 | VPS26B       | 1.169919416 |
| 6525 | 34.109739 | 29.157397 | CENPM        | 1.169848548 |
| 6526 | 5.1063798 | 4.3659157 | CLN5         | 1.169601092 |
| 6527 | 6.8380627 | 5.8469028 | KIF13A       | 1.169518807 |
| 6528 | 129.63433 | 110.86265 | PSMB6        | 1.16932378  |
| 6529 | 6.9499994 | 5.9440742 | NF1          | 1.169231594 |
| 6530 | 21.114561 | 18.059631 | KDM3B        | 1.169157935 |
| 6531 | 12.730354 | 10.888985 | CUX1         | 1.169103871 |
| 6532 | 1.8145971 | 1.5524449 | ZSWIM3       | 1.168864104 |
| 6533 | 66.315542 | 56.751261 | POLR2E       | 1.168529856 |
| 6534 | 4.3964007 | 3.7631388 | ACAD10       | 1.168280255 |



|      |           |           |              |             |
|------|-----------|-----------|--------------|-------------|
| 6535 | 19.160361 | 16.40139  | RAI1         | 1.168215695 |
| 6536 | 2.8952753 | 2.4792427 | STX17        | 1.167806308 |
| 6537 | 8.0771228 | 6.9174722 | C2orf68      | 1.167640803 |
| 6538 | 3.1264391 | 2.6780897 | CABYR        | 1.1674139   |
| 6539 | 7.2432795 | 6.2045514 | ABCB6        | 1.1674139   |
| 6540 | 11.125563 | 9.5330138 | ATXN1L       | 1.167056209 |
| 6541 | 13.999626 | 11.996896 | BTG1         | 1.166937405 |
| 6542 | 12.558681 | 10.762847 | NAA40        | 1.166854883 |
| 6543 | 20.120203 | 17.24389  | KIAA1279     | 1.166801887 |
| 6544 | 17.694297 | 15.167945 | WIPF1        | 1.166558651 |
| 6545 | 39.164241 | 33.591308 | C12orf44     | 1.165904017 |
| 6546 | 68.590097 | 58.840551 | NACC1        | 1.165694326 |
| 6547 | 50.93128  | 43.700094 | GOT1         | 1.165473003 |
| 6548 | 5.6539414 | 4.8519352 | BLOC1S3      | 1.165296142 |
| 6549 | 83.832094 | 71.940591 | DNAJC8       | 1.165296142 |
| 6550 | 19.077069 | 16.373046 | SAP130       | 1.165150897 |
| 6551 | 11.290142 | 9.6938975 | CEBPG        | 1.164664887 |
| 6552 | 19.693485 | 16.911367 | SMC1A        | 1.164511715 |
| 6553 | 10.781884 | 9.2607006 | INTS9        | 1.164262277 |
| 6554 | 15.043599 | 12.922118 | FKBP15       | 1.164174416 |
| 6555 | 83.169336 | 71.480666 | PTP4A2       | 1.163522122 |
| 6556 | 27.772626 | 23.869509 | SUN1         | 1.163518979 |
| 6557 | 0.7238887 | 0.6223013 | ANKRD23      | 1.163244565 |
| 6558 | 1.6438173 | 1.4131313 | NRTN         | 1.163244565 |
| 6559 | 0.6315136 | 0.5428898 | LOC100506123 | 1.163244565 |
| 6560 | 18.589627 | 15.980841 | MSL1         | 1.163244565 |
| 6561 | 2.5091579 | 2.1570338 | ZBTB3        | 1.163244565 |
| 6562 | 96.93     | 83.327275 | MRPL28       | 1.163244565 |
| 6563 | 4.1154043 | 3.5378668 | SPP1         | 1.163244565 |
| 6564 | 1.1984636 | 1.0302765 | FBXO6        | 1.163244564 |
| 6565 | 0.365115  | 0.3138763 | LRRC2        | 1.163244564 |
| 6566 | 0.5592115 | 0.4807343 | PHYHIP       | 1.163244564 |
| 6567 | 25.684241 | 22.083912 | PARP4        | 1.163029507 |
| 6568 | 151.72078 | 130.45555 | C6orf48      | 1.16300741  |
| 6569 | 56.387034 | 48.489545 | TXNL1        | 1.162869929 |
| 6570 | 18.121696 | 15.588827 | ORMDL1       | 1.162479776 |
| 6571 | 22.758549 | 19.578934 | UBTD1        | 1.162399797 |
| 6572 | 39.770897 | 34.232363 | SNHG5        | 1.161792324 |
| 6573 | 16.904395 | 14.560491 | LSM6         | 1.160977031 |
| 6574 | 78.853865 | 67.939177 | RHOG         | 1.160653819 |
| 6575 | 1.4981012 | 1.2907913 | THRB         | 1.160606822 |
| 6576 | 29.231609 | 25.193481 | TMEM165      | 1.160284655 |
| 6577 | 2.5187538 | 2.171167  | LOC253039    | 1.16009214  |

|      |           |           |              |             |
|------|-----------|-----------|--------------|-------------|
| 6578 | 13.857493 | 11.947424 | TDP2         | 1.159872841 |
| 6579 | 4.0413922 | 3.4847058 | LAMTOR3      | 1.159751337 |
| 6580 | 20.417347 | 17.628666 | NFKB1        | 1.158190119 |
| 6581 | 139.77332 | 120.6849  | RUVBL2       | 1.158167428 |
| 6582 | 2.9862774 | 2.5786572 | HEMK1        | 1.158074589 |
| 6583 | 2.3118804 | 1.9963139 | CLK4         | 1.158074589 |
| 6584 | 45.985554 | 39.728862 | CARS         | 1.157484788 |
| 6585 | 5.4536618 | 4.713257  | ICAM3        | 1.157089831 |
| 6586 | 33.891787 | 29.296713 | ANKRD40      | 1.15684608  |
| 6587 | 11.978693 | 10.361617 | RFWD2        | 1.156064043 |
| 6588 | 34.297408 | 29.667999 | PDXP         | 1.1560405   |
| 6589 | 13.929958 | 12.053873 | WASH5P       | 1.15564166  |
| 6590 | 1.0786136 | 0.9333461 | ZNF543       | 1.155641659 |
| 6591 | 1.017628  | 0.880574  | CREBRF       | 1.155641659 |
| 6592 | 7.4615399 | 6.4566207 | MED26        | 1.155641659 |
| 6593 | 2.6954326 | 2.3324121 | MZF1         | 1.155641659 |
| 6594 | 1.1232881 | 0.9720038 | RPLP0P2      | 1.155641659 |
| 6595 | 19.603896 | 16.972817 | SGPL1        | 1.15501719  |
| 6596 | 6.4090701 | 5.5501618 | ARMC9        | 1.154753728 |
| 6597 | 2.5492294 | 2.2086028 | MCTP1        | 1.154227165 |
| 6598 | 19.690051 | 17.062252 | ZFAND2B      | 1.154012465 |
| 6599 | 8.564634  | 7.4222252 | LRPAP1       | 1.153917288 |
| 6600 | 7.5372295 | 6.5320815 | CNEP1R1      | 1.153878666 |
| 6601 | 7.3082468 | 6.3356261 | PEAK1        | 1.153516115 |
| 6602 | 2.8561368 | 2.4764858 | LOC100862671 | 1.153302303 |
| 6603 | 52.116687 | 45.200308 | TRAM1        | 1.153016195 |
| 6604 | 20.331659 | 17.639051 | TJAP1        | 1.152650351 |
| 6605 | 27.649043 | 23.993232 | ARID1A       | 1.152368392 |
| 6606 | 18.50542  | 16.061418 | TINF2        | 1.152166045 |
| 6607 | 5.8185615 | 5.0530514 | PVRL3        | 1.151494619 |
| 6608 | 2.7122379 | 2.3554064 | TMEM8B       | 1.151494619 |
| 6609 | 14.324753 | 12.441696 | ARAP3        | 1.151350449 |
| 6610 | 43.277331 | 37.598093 | XPNPEP1      | 1.151051225 |
| 6611 | 2.2782232 | 1.9792544 | MBTD1        | 1.151051225 |
| 6612 | 4.5620449 | 3.9644564 | SLC25A40     | 1.150736559 |
| 6613 | 34.043185 | 29.587046 | CDKN3        | 1.150611165 |
| 6614 | 45.423507 | 39.482466 | M6PR         | 1.150472885 |
| 6615 | 7.3983069 | 6.4315228 | ZNF408       | 1.150319625 |
| 6616 | 5.2527424 | 4.5681028 | ABCC10       | 1.149873937 |
| 6617 | 2.231258  | 1.9421099 | ANKRD37      | 1.148883521 |
| 6618 | 1.0332152 | 0.8993211 | ACTRT3       | 1.148883521 |
| 6619 | 6.9120896 | 6.0163536 | TIGD5        | 1.148883521 |
| 6620 | 4.1185672 | 3.5848431 | PMS2P1       | 1.148883521 |

|      |           |           |           |             |
|------|-----------|-----------|-----------|-------------|
| 6621 | 1.5425574 | 1.3426578 | GDPGP1    | 1.14888352  |
| 6622 | 2.7100065 | 2.3588175 | ZKSCAN4   | 1.14888352  |
| 6623 | 0.72512   | 0.6311519 | LOC349196 | 1.14888352  |
| 6624 | 1.1613235 | 1.0108279 | WHAMMP3   | 1.14888352  |
| 6625 | 0.7440182 | 0.6476011 | KANK3     | 1.148883519 |
| 6626 | 21.430125 | 18.667036 | KIF18B    | 1.148019699 |
| 6627 | 7.5424513 | 6.5726254 | RANBP10   | 1.147555332 |
| 6628 | 2.8845454 | 2.514182  | TBC1D15   | 1.147309708 |
| 6629 | 21.180149 | 18.467259 | PBK       | 1.146902687 |
| 6630 | 5.4948429 | 4.7925483 | LIMCH1    | 1.14653886  |
| 6631 | 2.808025  | 2.4494586 | TDRD7     | 1.146385948 |
| 6632 | 13.580173 | 11.849947 | PCED1A    | 1.146011311 |
| 6633 | 3.4157024 | 2.9811195 | VSIG10    | 1.14577843  |
| 6634 | 6.4002843 | 5.5859703 | RNF146    | 1.14577843  |
| 6635 | 5.6547846 | 4.9353212 | DUSP22    | 1.14577843  |
| 6636 | 29.466172 | 25.718902 | C16orf58  | 1.145701018 |
| 6637 | 18.045221 | 15.750848 | RPS6KA1   | 1.145666647 |
| 6638 | 13.075593 | 11.414703 | MIP       | 1.145504451 |
| 6639 | 6.6222406 | 5.7822166 | KIAA1217  | 1.14527716  |
| 6640 | 21.567068 | 18.831792 | TUSC2     | 1.145247813 |
| 6641 | 10.468251 | 9.1411606 | C10orf76  | 1.145177444 |
| 6642 | 492.21668 | 429.88502 | RHOA      | 1.14499611  |
| 6643 | 4.7173308 | 4.12073   | CCNE2     | 1.144780365 |
| 6644 | 2.2747833 | 1.9870915 | LINC00341 | 1.144780365 |
| 6645 | 5.0511216 | 4.4123063 | CCDC134   | 1.144780365 |
| 6646 | 2.1420373 | 1.8711339 | MBD5      | 1.144780365 |
| 6647 | 5.3645344 | 4.6871592 | DST       | 1.144517217 |
| 6648 | 11.737698 | 10.25707  | MLL4      | 1.144351961 |
| 6649 | 51.798085 | 45.266012 | SUPT5H    | 1.144304149 |
| 6650 | 58.872906 | 51.452022 | MPRIP     | 1.144229195 |
| 6651 | 0.8267298 | 0.7226693 | CSMD2     | 1.143994654 |
| 6652 | 11.121087 | 9.7217486 | QKI       | 1.143938959 |
| 6653 | 3.9835464 | 3.4831521 | HOXD-AS1  | 1.143661323 |
| 6654 | 4.6715563 | 4.0861027 | ARID4B    | 1.143279211 |
| 6655 | 47.626056 | 41.664821 | PRPF31    | 1.143075978 |
| 6656 | 27.000861 | 23.626174 | PEX14     | 1.142836765 |
| 6657 | 3.6439546 | 3.1885171 | CRADD     | 1.142836765 |
| 6658 | 11.362016 | 9.9452526 | IFNAR2    | 1.1424562   |
| 6659 | 3.0527014 | 2.6723733 | PHLPP2    | 1.142318472 |
| 6660 | 12.305728 | 10.773357 | SPECC1L   | 1.142237087 |
| 6661 | 30.711505 | 26.899733 | MINK1     | 1.141702999 |
| 6662 | 102.63987 | 89.912064 | PFDN2     | 1.141558424 |
| 6663 | 18.76438  | 16.443816 | LEPROTL1  | 1.141120794 |

|      |           |           |              |             |
|------|-----------|-----------|--------------|-------------|
| 6664 | 64.415255 | 56.4628   | FLII         | 1.14084414  |
| 6665 | 5.2984835 | 4.6445625 | ZEB2         | 1.140792791 |
| 6666 | 10.003924 | 8.7708126 | FAM220A      | 1.140592609 |
| 6667 | 37.390567 | 32.804402 | HUWE1        | 1.139803326 |
| 6668 | 16.116825 | 14.143709 | NR1D1        | 1.13950488  |
| 6669 | 17.678521 | 15.518491 | USP36        | 1.139190706 |
| 6670 | 1576.5079 | 1384.2572 | PFN1         | 1.138883638 |
| 6671 | 5.2075987 | 4.5743322 | UBOX5        | 1.138439125 |
| 6672 | 7.9286372 | 6.9644806 | ZNF668       | 1.138439125 |
| 6673 | 27.943024 | 24.548817 | NUDCD2       | 1.138263589 |
| 6674 | 10.699232 | 9.4038308 | WNT5A        | 1.137752469 |
| 6675 | 0.6642696 | 0.5840274 | BBS12        | 1.137394686 |
| 6676 | 1.5949866 | 1.4023159 | TBC1D12      | 1.137394686 |
| 6677 | 1.4976445 | 1.3167325 | KIAA1841     | 1.137394686 |
| 6678 | 1.0419975 | 0.9161266 | ZNF354B      | 1.137394685 |
| 6679 | 3.5518973 | 3.1228362 | RABIF        | 1.137394685 |
| 6680 | 1.1607061 | 1.0204954 | WASH2P       | 1.137394685 |
| 6681 | 2.2866778 | 2.0104523 | ZSCAN21      | 1.137394685 |
| 6682 | 0.5684092 | 0.4997467 | LOC100131564 | 1.137394684 |
| 6683 | 0.2674594 | 0.2351509 | IGSF10       | 1.137394682 |
| 6684 | 6.8907788 | 6.0638465 | ZNF48        | 1.136370928 |
| 6685 | 9.3240658 | 8.2055103 | 6-Sep        | 1.136317607 |
| 6686 | 4.0250772 | 3.5428333 | PDLIM2       | 1.136118148 |
| 6687 | 11.339447 | 9.9808695 | MEAF6        | 1.136118148 |
| 6688 | 7.2309435 | 6.3656126 | HSD17B1      | 1.135938354 |
| 6689 | 5.135258  | 4.5216692 | CREM         | 1.135699611 |
| 6690 | 32.246574 | 28.393577 | NDUFB1       | 1.135699611 |
| 6691 | 40.798452 | 35.925447 | KLF2         | 1.135642151 |
| 6692 | 11.142808 | 9.8149916 | SPG20        | 1.135284491 |
| 6693 | 12.52631  | 11.034205 | POP4         | 1.135225465 |
| 6694 | 1.5511045 | 1.3667651 | STXBP4       | 1.134872746 |
| 6695 | 144.15651 | 127.03915 | JUN          | 1.134740896 |
| 6696 | 7.9682162 | 7.0222553 | SLC25A4      | 1.134708984 |
| 6697 | 62.758172 | 55.316817 | MRPL40       | 1.134522477 |
| 6698 | 138.1443  | 121.80883 | COX7A2L      | 1.134107417 |
| 6699 | 1.5484229 | 1.365381  | HACE1        | 1.134059217 |
| 6700 | 103.94927 | 91.689736 | CHMP4B       | 1.133706723 |
| 6701 | 2.1020654 | 1.8546254 | ZXDB         | 1.133417781 |
| 6702 | 24.720357 | 21.812125 | SUGP1        | 1.133330949 |
| 6703 | 5.0613413 | 4.4672242 | MMAB         | 1.132994706 |
| 6704 | 2.609248  | 2.3040309 | SYT15        | 1.132470899 |
| 6705 | 114.37712 | 101.00283 | SND1         | 1.132415105 |
| 6706 | 319.05064 | 282.09136 | SUMO2        | 1.131018844 |

|      |           |           |              |             |
|------|-----------|-----------|--------------|-------------|
| 6707 | 41.613584 | 36.798115 | POLA2        | 1.130861818 |
| 6708 | 122.49607 | 108.32657 | C19orf53     | 1.130803481 |
| 6709 | 9.8182716 | 8.6826295 | TLK2         | 1.130794716 |
| 6710 | 19.571864 | 17.313809 | RNF216       | 1.130419322 |
| 6711 | 163.77799 | 144.92479 | LRRC59       | 1.130089551 |
| 6712 | 3.6184728 | 3.2029381 | C1RL         | 1.129735462 |
| 6713 | 14.462032 | 12.807914 | PQLC1        | 1.129148098 |
| 6714 | 22.947488 | 20.327611 | PTPRS        | 1.128882715 |
| 6715 | 12.582212 | 11.145974 | CCRN4L       | 1.12885711  |
| 6716 | 44.626532 | 39.545505 | ACAA2        | 1.128485588 |
| 6717 | 2.2072321 | 1.9567752 | LOC100289187 | 1.127994729 |
| 6718 | 2.699184  | 2.3929048 | BBC3         | 1.127994729 |
| 6719 | 5.9489599 | 5.2739252 | C1orf112     | 1.127994729 |
| 6720 | 1.6885847 | 1.4969793 | HERC2P9      | 1.127994729 |
| 6721 | 0.7422956 | 0.6580666 | LOC728743    | 1.127994729 |
| 6722 | 4.3830771 | 3.8893665 | FANCC        | 1.126938554 |
| 6723 | 58.448179 | 51.868931 | RPS19BP1     | 1.126843714 |
| 6724 | 6.5932127 | 5.8543963 | DGCR14       | 1.126198559 |
| 6725 | 2.2819163 | 2.0267381 | RCHY1        | 1.12590585  |
| 6726 | 6.9184116 | 6.1447514 | WDR83        | 1.12590585  |
| 6727 | 25.394376 | 22.557342 | COPS5        | 1.125769888 |
| 6728 | 20.553042 | 18.262909 | NSF          | 1.125398057 |
| 6729 | 30.85244  | 27.425306 | MICU1        | 1.124962485 |
| 6730 | 11.676033 | 10.379657 | CHCHD7       | 1.124895843 |
| 6731 | 11.087149 | 9.8572962 | KANSL1       | 1.124765737 |
| 6732 | 7.0192874 | 6.2413771 | TFDP2        | 1.124637602 |
| 6733 | 14.951477 | 13.294894 | PELO         | 1.124602993 |
| 6734 | 10.711677 | 9.5270437 | SUMF1        | 1.12434426  |
| 6735 | 55.256496 | 49.14769  | CRTAP        | 1.12429487  |
| 6736 | 32.688651 | 29.081922 | ADPGK        | 1.124019623 |
| 6737 | 16.080208 | 14.307409 | TRIM47       | 1.123907792 |
| 6738 | 1.2464085 | 1.1089953 | USP43        | 1.123907792 |
| 6739 | 2.218432  | 1.9738559 | ENPP4        | 1.123907792 |
| 6740 | 1.4488286 | 1.2890991 | HELQ         | 1.123907792 |
| 6741 | 1.1017102 | 0.9802496 | LCA5         | 1.123907791 |
| 6742 | 20.965115 | 18.661838 | ATP13A2      | 1.123421777 |
| 6743 | 5.8339927 | 5.1933754 | SAP30L       | 1.123352776 |
| 6744 | 27.664729 | 24.633626 | CHMP7        | 1.123047384 |
| 6745 | 12.505495 | 11.135648 | ANAPC2       | 1.12301462  |
| 6746 | 5.6203779 | 5.0047237 | ANKIB1       | 1.12301462  |
| 6747 | 10.69253  | 9.5299284 | C22orf23     | 1.121994758 |
| 6748 | 15.725684 | 14.01842  | ZFYVE21      | 1.121787211 |
| 6749 | 5.9041912 | 5.2639765 | ZNF394       | 1.121621878 |

|      |           |           |            |             |
|------|-----------|-----------|------------|-------------|
| 6750 | 13.672409 | 12.191582 | TPCN1      | 1.121463038 |
| 6751 | 4.3024952 | 3.8378524 | RIC8B      | 1.121068446 |
| 6752 | 7.5902222 | 6.7705253 | GGPS1      | 1.121068446 |
| 6753 | 25.852784 | 23.079517 | ARFGAP2    | 1.120161433 |
| 6754 | 6.6297341 | 5.9185524 | PPIP5K1    | 1.120161433 |
| 6755 | 8.9481814 | 7.9882963 | SENP1      | 1.120161432 |
| 6756 | 1.7518225 | 1.5639018 | TESK2      | 1.120161432 |
| 6757 | 1.996458  | 1.7822949 | USP27X     | 1.120161432 |
| 6758 | 2.9357343 | 2.6208136 | UTP14C     | 1.120161432 |
| 6759 | 17.24725  | 15.405637 | SLC39A6    | 1.119541531 |
| 6760 | 14.627979 | 13.068573 | MRI1       | 1.119324867 |
| 6761 | 50.227222 | 44.889026 | REEP5      | 1.118919844 |
| 6762 | 13.353039 | 11.93434  | KDM4A      | 1.118875369 |
| 6763 | 23.224242 | 20.757725 | RAB14      | 1.11882404  |
| 6764 | 12.41272  | 11.096163 | RBM4       | 1.118649744 |
| 6765 | 51.992255 | 46.489692 | SEPN1      | 1.118360943 |
| 6766 | 35.248206 | 31.52806  | ATP5G3     | 1.117994776 |
| 6767 | 1.9336534 | 1.7298238 | USP35      | 1.117832614 |
| 6768 | 14.484504 | 12.960051 | CISD1      | 1.117627131 |
| 6769 | 54.324364 | 48.613039 | UQCR11     | 1.117485462 |
| 6770 | 2.1929899 | 1.9626145 | GEN1       | 1.117381876 |
| 6771 | 0.8582652 | 0.7685626 | OLFML2A    | 1.116714783 |
| 6772 | 2.5965789 | 2.3251944 | CTPS2      | 1.116714782 |
| 6773 | 4.7523535 | 4.2556556 | BBIP1      | 1.116714782 |
| 6774 | 7.6933583 | 6.8933303 | CLDN12     | 1.116058277 |
| 6775 | 85.749895 | 76.84772  | MRPL18     | 1.115841752 |
| 6776 | 1.3599203 | 1.2189747 | ZNF814     | 1.115626366 |
| 6777 | 3.5483304 | 3.1805723 | FBXO3      | 1.115626366 |
| 6778 | 13.939587 | 12.499892 | DEF8       | 1.115176607 |
| 6779 | 7.3569409 | 6.6019577 | CISD2      | 1.114357487 |
| 6780 | 6.2778172 | 5.6356706 | SOAT1      | 1.113943249 |
| 6781 | 44.834711 | 40.250895 | POLDIP3    | 1.113881093 |
| 6782 | 47.409443 | 42.570702 | FKBP10     | 1.113663649 |
| 6783 | 0.8019772 | 0.7202095 | NPIPL3     | 1.113533259 |
| 6784 | 1.960748  | 1.7608347 | MDM1       | 1.113533259 |
| 6785 | 0.6078319 | 0.5458588 | SLFNL1-AS1 | 1.113533259 |
| 6786 | 2.8716467 | 2.5788602 | HS3ST3B1   | 1.113533258 |
| 6787 | 4.3807703 | 3.9341171 | TMSB15A    | 1.113533258 |
| 6788 | 12.529925 | 11.252403 | ASB6       | 1.113533258 |
| 6789 | 191.2018  | 171.76152 | PCBP2      | 1.113181838 |
| 6790 | 9.2221039 | 8.2887643 | LYN        | 1.112602988 |
| 6791 | 15.33676  | 13.785524 | TIMM8B     | 1.112526447 |
| 6792 | 101.7765  | 91.486404 | SDHB       | 1.112476775 |

|      |           |           |           |             |
|------|-----------|-----------|-----------|-------------|
| 6793 | 120.71375 | 108.58586 | LMNB2     | 1.11168945  |
| 6794 | 3.2921302 | 2.9617612 | EGLN3     | 1.111544806 |
| 6795 | 35.181295 | 31.650812 | CNPY3     | 1.111544806 |
| 6796 | 19.186873 | 17.271667 | FGFR1     | 1.110887177 |
| 6797 | 276.24143 | 248.68252 | S100A10   | 1.110819677 |
| 6798 | 16.009498 | 14.415343 | GPN2      | 1.110587403 |
| 6799 | 33.812432 | 30.456594 | EIF2B1    | 1.110184286 |
| 6800 | 15.145313 | 13.642981 | CXorf56   | 1.110117512 |
| 6801 | 252.11257 | 227.11001 | DYNLL1    | 1.110090051 |
| 6802 | 48.449565 | 43.647304 | PIH1D1    | 1.110024225 |
| 6803 | 0.8555307 | 0.7709892 | FRY       | 1.109653352 |
| 6804 | 2.7803451 | 2.5055979 | ETAA1     | 1.109653352 |
| 6805 | 6.3372559 | 5.7117524 | LGALS8    | 1.10951167  |
| 6806 | 44.768456 | 40.354827 | GRAMD1A   | 1.109370517 |
| 6807 | 11.710067 | 10.557268 | MRPL50    | 1.109194817 |
| 6808 | 4.3834476 | 3.9519186 | PNPLA3    | 1.109194817 |
| 6809 | 2.4010097 | 2.164642  | CCSAP     | 1.109194817 |
| 6810 | 19.711536 | 17.774153 | DNAJB12   | 1.108999999 |
| 6811 | 15.837935 | 14.285761 | TUBGCP3   | 1.108651859 |
| 6812 | 99.207379 | 89.508043 | SLC25A39  | 1.108362732 |
| 6813 | 29.893605 | 26.979715 | APBA2     | 1.108003003 |
| 6814 | 0.3925154 | 0.3543031 | REPS2     | 1.107851968 |
| 6815 | 0.8265448 | 0.7460788 | ZNF788    | 1.107851966 |
| 6816 | 7.5373553 | 6.8035763 | ZNF646    | 1.107851966 |
| 6817 | 1.4189707 | 1.2808306 | IDUA      | 1.107851966 |
| 6818 | 10.400165 | 9.3876849 | NFIL3     | 1.107851966 |
| 6819 | 10.511955 | 9.4885914 | ITFG2     | 1.107851966 |
| 6820 | 1.1289247 | 1.0190213 | PRRG4     | 1.107851966 |
| 6821 | 0.7391801 | 0.6672192 | ZNF761    | 1.107851966 |
| 6822 | 0.8895824 | 0.8029795 | LOC642846 | 1.107851965 |
| 6823 | 8.5650112 | 7.7342385 | EFNB2     | 1.107414944 |
| 6824 | 14.150754 | 12.77848  | KCMF1     | 1.107389397 |
| 6825 | 21.776606 | 19.665061 | RBBP4     | 1.107375471 |
| 6826 | 4.6330876 | 4.1866591 | TLN2      | 1.106631192 |
| 6827 | 11.421716 | 10.321857 | C18orf8   | 1.106556233 |
| 6828 | 2.0093014 | 1.8165075 | ZDHHC17   | 1.106134367 |
| 6829 | 5.9230009 | 5.3546848 | SNX25     | 1.106134366 |
| 6830 | 9.0228834 | 8.1632508 | HILPDA    | 1.10530518  |
| 6831 | 15.208729 | 13.765289 | PRRC1     | 1.104860881 |
| 6832 | 10.003816 | 9.0557212 | RNF19B    | 1.104695693 |
| 6833 | 0.3683909 | 0.3335379 | SH3TC2    | 1.104494837 |
| 6834 | 14.044763 | 12.717423 | ACSS2     | 1.104371802 |
| 6835 | 21.866123 | 19.802331 | TM7SF3    | 1.104219665 |

|      |           |           |              |             |
|------|-----------|-----------|--------------|-------------|
| 6836 | 27.240459 | 24.670126 | SFXN3        | 1.104188052 |
| 6837 | 63.135948 | 57.17902  | SLC2A1       | 1.104180309 |
| 6838 | 7.6984207 | 6.9734297 | RUNDC1       | 1.103964766 |
| 6839 | 214.30926 | 194.16971 | ITGB1        | 1.103721362 |
| 6840 | 1.8100158 | 1.6399487 | GK5          | 1.103702708 |
| 6841 | 23.26999  | 21.093182 | COX11        | 1.103199569 |
| 6842 | 2.0294534 | 1.8400595 | ADAT3        | 1.10292818  |
| 6843 | 1.4298422 | 1.2964055 | LOC100132832 | 1.10292818  |
| 6844 | 1.931861  | 1.7515746 | MTM1         | 1.10292818  |
| 6845 | 1.2785245 | 1.1592092 | CYP1A1       | 1.102928179 |
| 6846 | 44.733477 | 40.571768 | CSNK1G2      | 1.102576481 |
| 6847 | 12.811085 | 11.626128 | FAM188A      | 1.101921858 |
| 6848 | 12.810303 | 11.626034 | POLR3H       | 1.101863577 |
| 6849 | 108.67856 | 98.634239 | ILK          | 1.101834005 |
| 6850 | 21.117816 | 19.16944  | CLASRP       | 1.101639712 |
| 6851 | 5.1288677 | 4.656555  | CHEK2        | 1.101429636 |
| 6852 | 22.509637 | 20.450208 | FNDC3B       | 1.100704534 |
| 6853 | 3.3596402 | 3.0522634 | WDFY3        | 1.100704534 |
| 6854 | 7.1064743 | 6.4588053 | MECR         | 1.10027691  |
| 6855 | 4.1999093 | 3.8181172 | TMEM254      | 1.09999486  |
| 6856 | 4.4396996 | 4.0361094 | SLC35E3      | 1.09999486  |
| 6857 | 95.835091 | 87.137085 | FAM96B       | 1.099819795 |
| 6858 | 15.711761 | 14.286619 | BICD2        | 1.099753634 |
| 6859 | 6.5614504 | 5.9668771 | C15orf38     | 1.099645655 |
| 6860 | 15.186399 | 13.814607 | MSRB1        | 1.099300126 |
| 6861 | 3.9446809 | 3.5886768 | DPY19L4      | 1.099202071 |
| 6862 | 271.05948 | 246.65894 | MYL12B       | 1.098924222 |
| 6863 | 273.91904 | 249.26277 | ATP5J2       | 1.098916764 |
| 6864 | 0.6327543 | 0.5759538 | SLC2A12      | 1.098619867 |
| 6865 | 0.5444585 | 0.4955841 | SLC46A1      | 1.098619866 |
| 6866 | 2.3208592 | 2.1125225 | PLCD1        | 1.098619866 |
| 6867 | 28.66649  | 26.097966 | KCTD5        | 1.098418543 |
| 6868 | 276.60853 | 251.8362  | CCT7         | 1.098366833 |
| 6869 | 26.517977 | 24.157962 | TMED7        | 1.09769097  |
| 6870 | 3.4013729 | 3.0997629 | AFG3L1P      | 1.097300995 |
| 6871 | 9.8018938 | 8.9362137 | KLHL12       | 1.096873253 |
| 6872 | 15.86408  | 14.463863 | SLC4A1AP     | 1.096807959 |
| 6873 | 66.266831 | 60.423637 | SLC39A7      | 1.09670377  |
| 6874 | 5.0953423 | 4.6462305 | TRMT44       | 1.096661542 |
| 6875 | 3.4576831 | 3.1529173 | UFL1         | 1.096661542 |
| 6876 | 22.765239 | 20.758673 | IP6K1        | 1.096661542 |
| 6877 | 41.815887 | 38.13956  | LAMTOR4      | 1.096391429 |
| 6878 | 21.11416  | 19.270803 | VHL          | 1.095655431 |



|      |           |           |            |             |
|------|-----------|-----------|------------|-------------|
| 6879 | 35.990494 | 32.873482 | MAT2B      | 1.094818414 |
| 6880 | 26.033502 | 23.778831 | PSMD10     | 1.094818414 |
| 6881 | 12.832357 | 11.72642  | CENPO      | 1.094311553 |
| 6882 | 56.991659 | 52.086431 | SLC9A3R2   | 1.094174782 |
| 6883 | 47.0782   | 43.026216 | BTBD2      | 1.094174781 |
| 6884 | 19.344802 | 17.680838 | TFIP11     | 1.094111167 |
| 6885 | 5.5211814 | 5.0484046 | GCC1       | 1.093648736 |
| 6886 | 43.56784  | 39.853102 | SLC2A4RG   | 1.093210751 |
| 6887 | 16.762568 | 15.335162 | KAT8       | 1.093080607 |
| 6888 | 3.4411197 | 3.1487851 | KIAA0232   | 1.092840422 |
| 6889 | 17.746825 | 16.244854 | FOXK1      | 1.09245831  |
| 6890 | 26.154276 | 23.948943 | MRPS23     | 1.092084785 |
| 6891 | 64.199846 | 58.800907 | VKORC1     | 1.091817267 |
| 6892 | 105.94222 | 97.066522 | RN7SL1     | 1.091439344 |
| 6893 | 18.430707 | 16.892739 | TMEM55B    | 1.091043178 |
| 6894 | 3.4293913 | 3.1433841 | ZYG11B     | 1.090987028 |
| 6895 | 6.7057089 | 6.1483464 | ZBTB45     | 1.090652438 |
| 6896 | 26.93526  | 24.700509 | ISOC1      | 1.090473896 |
| 6897 | 4.8465    | 4.4455531 | EPC1       | 1.090190558 |
| 6898 | 42.965387 | 39.424753 | BAP1       | 1.089807408 |
| 6899 | 18.004178 | 16.526126 | QSOX2      | 1.089437269 |
| 6900 | 8.3801545 | 7.6962629 | SEC22C     | 1.088860218 |
| 6901 | 34.169492 | 31.382691 | GYS1       | 1.088800566 |
| 6902 | 0.7764512 | 0.7133773 | CROCCP3    | 1.088415967 |
| 6903 | 14.573392 | 13.389542 | DPCD       | 1.088415967 |
| 6904 | 13.501124 | 12.404379 | SLC10A3    | 1.088415967 |
| 6905 | 1.6080208 | 1.4773955 | REL        | 1.088415967 |
| 6906 | 1.6612156 | 1.5262691 | SDCBP2-AS1 | 1.088415967 |
| 6907 | 110.56178 | 101.60539 | EFHD2      | 1.088148761 |
| 6908 | 56.273852 | 51.721822 | RNF187     | 1.088009842 |
| 6909 | 49.447681 | 45.474342 | SAP18      | 1.087375416 |
| 6910 | 15.557865 | 14.312393 | ANO10      | 1.087020562 |
| 6911 | 21.353249 | 19.658361 | TMEM14A    | 1.086217147 |
| 6912 | 66.58008  | 61.320421 | HSF1       | 1.085773379 |
| 6913 | 1.0601719 | 0.9764915 | ANO7       | 1.085694926 |
| 6914 | 4.9738148 | 4.5843015 | PGM3       | 1.084966761 |
| 6915 | 17.485013 | 16.117486 | SEMA4B     | 1.084847389 |
| 6916 | 37.171544 | 34.265059 | SYMPK      | 1.084823583 |
| 6917 | 27.197168 | 25.094728 | TRIM44     | 1.083780121 |
| 6918 | 13.784567 | 12.720768 | CEP85      | 1.083626937 |
| 6919 | 12.62833  | 11.655182 | TDG        | 1.083494938 |
| 6920 | 31.227665 | 28.828206 | HDDC2      | 1.083233034 |
| 6921 | 2.7921979 | 2.5776521 | C1orf74    | 1.083233034 |

|      |           |           |              |             |
|------|-----------|-----------|--------------|-------------|
| 6922 | 22.315924 | 20.607865 | FTSJD2       | 1.082883829 |
| 6923 | 57.108775 | 52.756033 | SRP68        | 1.082507006 |
| 6924 | 6.6985554 | 6.1903982 | MED7         | 1.082087967 |
| 6925 | 14.076912 | 13.022181 | CDC42EP2     | 1.080994949 |
| 6926 | 1.1420511 | 1.0564814 | RFFL         | 1.080994949 |
| 6927 | 7.0467341 | 6.5187484 | UAP1L1       | 1.080994949 |
| 6928 | 1.1344825 | 1.0494799 | C1orf106     | 1.080994949 |
| 6929 | 8.0153654 | 7.4148037 | RAB3IL1      | 1.080994949 |
| 6930 | 2.3177894 | 2.144126  | RNF170       | 1.080994949 |
| 6931 | 47.952621 | 44.370608 | NDUFAB1      | 1.080729413 |
| 6932 | 27.670159 | 25.604667 | RCN2         | 1.080668561 |
| 6933 | 151.63301 | 140.46525 | ATP5O        | 1.079505519 |
| 6934 | 14.617565 | 13.545774 | MLL2         | 1.079123595 |
| 6935 | 1.0601077 | 0.9825351 | ABCB1        | 1.078951481 |
| 6936 | 3.8787034 | 3.5948821 | LOC154761    | 1.07895148  |
| 6937 | 2.7511485 | 2.5498353 | ZNF252P      | 1.07895148  |
| 6938 | 1.3932    | 1.2912536 | C3orf62      | 1.07895148  |
| 6939 | 12.729692 | 11.803495 | FAM103A1     | 1.078468079 |
| 6940 | 2.2326333 | 2.0704945 | PPP2R3A      | 1.078309247 |
| 6941 | 22.01861  | 20.419943 | KPNA6        | 1.078289473 |
| 6942 | 1794.2734 | 1664.3373 | GNB2L1       | 1.078070743 |
| 6943 | 10.242302 | 9.5012526 | CETN3        | 1.077994963 |
| 6944 | 13.956166 | 12.950133 | WIPF2        | 1.077685105 |
| 6945 | 4.9690632 | 4.6115235 | EOGT         | 1.077531807 |
| 6946 | 17.108279 | 15.879527 | DKK1         | 1.077379581 |
| 6947 | 8.0889773 | 7.5087138 | MEF2A        | 1.077278687 |
| 6948 | 6.6510479 | 6.1740497 | LPGAT1       | 1.077258565 |
| 6949 | 13.094076 | 12.157033 | ACBD3        | 1.077078301 |
| 6950 | 8.9641905 | 8.3226916 | MINPP1       | 1.077078301 |
| 6951 | 6.771494  | 6.2869097 | MORC4        | 1.077078301 |
| 6952 | 1.3311159 | 1.235858  | TRIM23       | 1.0770783   |
| 6953 | 6.46698   | 6.0058442 | LIN7C        | 1.076781175 |
| 6954 | 14.184914 | 13.174642 | LOC100505876 | 1.076683043 |
| 6955 | 12.950419 | 12.030248 | NSUN5        | 1.076488121 |
| 6956 | 17.94491  | 16.673313 | FEM1A        | 1.076265411 |
| 6957 | 3.2642428 | 3.0331218 | FAM109A      | 1.076199053 |
| 6958 | 3.8052553 | 3.5367656 | L3MBTL3      | 1.075913891 |
| 6959 | 6.5823823 | 6.1187479 | SLC35A5      | 1.075772751 |
| 6960 | 6.5522431 | 6.0907316 | FAM177A1     | 1.075772751 |
| 6961 | 0.6586904 | 0.612533  | LOC646214    | 1.075354976 |
| 6962 | 4.0955306 | 3.8085383 | CGRRF1       | 1.075354975 |
| 6963 | 12.445713 | 11.575556 | HEATR6       | 1.075171967 |
| 6964 | 6.7956359 | 6.3218424 | SPRYD7       | 1.074945472 |

|      |           |           |              |             |
|------|-----------|-----------|--------------|-------------|
| 6965 | 200.971   | 186.98514 | PPP1R14B     | 1.074796639 |
| 6966 | 25.701891 | 23.924744 | POLR3D       | 1.074280694 |
| 6967 | 17.760248 | 16.536791 | UBE2F        | 1.073983932 |
| 6968 | 3.1527405 | 2.9355565 | KIAA1549     | 1.073983932 |
| 6969 | 59.391939 | 55.305026 | RAP1B        | 1.073897667 |
| 6970 | 307.38484 | 286.33812 | BANF1        | 1.073503044 |
| 6971 | 22.783225 | 21.22409  | C6orf1       | 1.073460633 |
| 6972 | 29.654759 | 27.627316 | MOCS2        | 1.073385461 |
| 6973 | 7.1280924 | 6.6430572 | DHRS11       | 1.073013854 |
| 6974 | 26.516279 | 24.713374 | UBE3C        | 1.0729526   |
| 6975 | 110.81061 | 103.31103 | UQCR10       | 1.072592238 |
| 6976 | 76.219864 | 71.078892 | HNRNPA0      | 1.072327689 |
| 6977 | 6.1585077 | 5.743316  | LOC100287314 | 1.072291286 |
| 6978 | 17.878566 | 16.681398 | ARFRP1       | 1.071766681 |
| 6979 | 33.287714 | 31.06864  | HDAC7        | 1.071424858 |
| 6980 | 26.940739 | 25.146913 | ANKRD52      | 1.071333883 |
| 6981 | 22.174854 | 20.698932 | GIT1         | 1.071304273 |
| 6982 | 5.0616294 | 4.7264152 | SPATA2L      | 1.070923567 |
| 6983 | 16.169525 | 15.100988 | TRMT2A       | 1.070759441 |
| 6984 | 18.772444 | 17.5419   | VBP1         | 1.070148845 |
| 6985 | 30.447564 | 28.456725 | SLC6A6       | 1.069960218 |
| 6986 | 1.4776613 | 1.3814435 | FAM214A      | 1.069650175 |
| 6987 | 3.3079286 | 3.0925331 | PELI1        | 1.069650174 |
| 6988 | 13.008171 | 12.164611 | DDR1         | 1.069345431 |
| 6989 | 10.267239 | 9.6014243 | BANP         | 1.069345431 |
| 6990 | 36.268963 | 33.938913 | TMEM54       | 1.068654225 |
| 6991 | 1.0615157 | 0.9934991 | CADPS2       | 1.068461675 |
| 6992 | 24.016299 | 22.477455 | MTG1         | 1.068461674 |
| 6993 | 2.8522669 | 2.6695079 | SEPT7P2      | 1.068461674 |
| 6994 | 3.0487893 | 2.8534381 | THAP10       | 1.068461674 |
| 6995 | 2.8211286 | 2.6403648 | PHF7         | 1.068461674 |
| 6996 | 3.8534951 | 3.6065824 | PKI55        | 1.068461674 |
| 6997 | 4.47966   | 4.1941125 | ZHX2         | 1.068082921 |
| 6998 | 95.708624 | 89.62188  | ARPC4        | 1.067915824 |
| 6999 | 3.2123237 | 3.0096258 | VRK2         | 1.067349851 |
| 7000 | 1062.7757 | 995.80155 | RPS20        | 1.067256551 |
| 7001 | 11.508893 | 10.788033 | ECHDC1       | 1.066820412 |
| 7002 | 35.656114 | 33.429031 | CCNG1        | 1.06662123  |
| 7003 | 2.5405185 | 2.3825383 | GTDC1        | 1.066307518 |
| 7004 | 6.5155694 | 6.1104037 | CAMTA1       | 1.066307518 |
| 7005 | 3.6600232 | 3.4324274 | ANKRD36BP1   | 1.066307518 |
| 7006 | 8.8056127 | 8.2580424 | TOP3B        | 1.066307517 |
| 7007 | 296.32968 | 277.93905 | COX4I1       | 1.066167879 |

|      |           |           |          |             |
|------|-----------|-----------|----------|-------------|
| 7008 | 9.7155944 | 9.1142849 | GPATCH3  | 1.0659744   |
| 7009 | 8.5294847 | 8.0028162 | UGCG     | 1.065810404 |
| 7010 | 4.4410835 | 4.1668607 | MICALL2  | 1.065810404 |
| 7011 | 253.5291  | 237.8813  | SNRPD2   | 1.065779842 |
| 7012 | 5.4948298 | 5.1578743 | CBFA2T2  | 1.065328355 |
| 7013 | 6.4239193 | 6.02999   | EEF1E1   | 1.065328355 |
| 7014 | 15.31843  | 14.382007 | BRPF3    | 1.065110764 |
| 7015 | 9.7510616 | 9.1571242 | SLC11A2  | 1.064860696 |
| 7016 | 23.639925 | 22.206806 | MRPL43   | 1.06453511  |
| 7017 | 66.185803 | 62.175939 | FEN1     | 1.064492217 |
| 7018 | 10.147187 | 9.5331851 | FOXN3    | 1.064406791 |
| 7019 | 66.876279 | 62.845728 | TXNRD1   | 1.064134041 |
| 7020 | 18.1328   | 17.042649 | PCID2    | 1.063966043 |
| 7021 | 6.7104263 | 6.3078472 | SGPP1    | 1.063821952 |
| 7022 | 0.9803191 | 0.9217529 | CEP85L   | 1.063537887 |
| 7023 | 31.708725 | 29.817004 | AKAP8L   | 1.063444398 |
| 7024 | 42.143525 | 39.636996 | MICALL1  | 1.063237113 |
| 7025 | 16.149855 | 15.190974 | COMMD3   | 1.063121793 |
| 7026 | 16.810519 | 15.814436 | GGA3     | 1.062985687 |
| 7027 | 7.4789345 | 7.0375582 | IFT43    | 1.062717256 |
| 7028 | 14.155677 | 13.321926 | SMG8     | 1.062584897 |
| 7029 | 14.137337 | 13.306309 | GTF2B    | 1.062453751 |
| 7030 | 15.376139 | 14.473304 | NT5C2    | 1.06237935  |
| 7031 | 5.377589  | 5.0620997 | FEM1C    | 1.062323803 |
| 7032 | 13.046655 | 12.282137 | SUPT20H  | 1.062246403 |
| 7033 | 1.2973757 | 1.2217022 | ANKRD44  | 1.061940984 |
| 7034 | 35.405082 | 33.341406 | KDM2A    | 1.061895283 |
| 7035 | 23.509405 | 22.149727 | LCMT1    | 1.061385769 |
| 7036 | 14.237503 | 13.416348 | C16orf72 | 1.061205568 |
| 7037 | 1.9925424 | 1.8776215 | CCDC149  | 1.061205568 |
| 7038 | 32.752478 | 30.86623  | MED24    | 1.061110426 |
| 7039 | 17.03213  | 16.052483 | TBP      | 1.061027722 |
| 7040 | 12.019131 | 11.328447 | PACSIN3  | 1.060968956 |
| 7041 | 28.353327 | 26.73192  | DGKZ     | 1.060654344 |
| 7042 | 2.5214701 | 2.3776062 | USP53    | 1.060507865 |
| 7043 | 36.069144 | 34.021966 | DHRS7    | 1.060172261 |
| 7044 | 18.534446 | 17.487883 | C9orf89  | 1.059845048 |
| 7045 | 9.0994457 | 8.5856378 | TCP11L1  | 1.059845048 |
| 7046 | 141.75497 | 133.76227 | PFN2     | 1.059753055 |
| 7047 | 8.444064  | 7.9704497 | PDCL     | 1.059421279 |
| 7048 | 2.3247753 | 2.1948106 | ZSCAN2   | 1.059214563 |
| 7049 | 6.6058709 | 6.2365749 | CDK11A   | 1.059214563 |
| 7050 | 21.447923 | 20.252782 | LLPH     | 1.059011181 |

|      |           |           |              |             |
|------|-----------|-----------|--------------|-------------|
| 7051 | 36.268963 | 34.254918 | TRPC4AP      | 1.058795791 |
| 7052 | 2.3947564 | 2.2621618 | CACNB1       | 1.058614101 |
| 7053 | 5.9149693 | 5.5874651 | SERGEF       | 1.058614101 |
| 7054 | 74.370336 | 70.274483 | NAP1L4       | 1.058283646 |
| 7055 | 1.7005894 | 1.6072992 | PTPRE        | 1.058041568 |
| 7056 | 13.136931 | 12.416271 | CHCHD5       | 1.058041567 |
| 7057 | 10.2106   | 9.6529935 | DCAF6        | 1.057765173 |
| 7058 | 51.902847 | 49.107552 | 15-Sep       | 1.056921891 |
| 7059 | 12.410488 | 11.742669 | TBC1D13      | 1.056871168 |
| 7060 | 4.9612543 | 4.6943972 | CUL9         | 1.05684589  |
| 7061 | 21.867138 | 20.691108 | NUP214       | 1.056837477 |
| 7062 | 14.922433 | 14.120791 | TAB1         | 1.056770392 |
| 7063 | 163.00322 | 154.34561 | PCBP1        | 1.056092339 |
| 7064 | 35.021769 | 33.162026 | SPSB1        | 1.056080502 |
| 7065 | 72.548631 | 68.701677 | PDIA6        | 1.055995066 |
| 7066 | 5.807921  | 5.4999509 | TTC7A        | 1.055995066 |
| 7067 | 2.5158893 | 2.3824821 | CBLB         | 1.055995065 |
| 7068 | 5.9948848 | 5.678246  | TRIM68       | 1.055763488 |
| 7069 | 5.1327346 | 4.8626774 | PRR5L        | 1.055536734 |
| 7070 | 6.1626889 | 5.838441  | ZNF830       | 1.055536734 |
| 7071 | 24.578829 | 23.289195 | PPP1R10      | 1.055374768 |
| 7072 | 20.297585 | 19.232878 | MTMR14       | 1.055358705 |
| 7073 | 6.9819122 | 6.615953  | MED21        | 1.055314657 |
| 7074 | 1.771502  | 1.6789943 | FAM13A       | 1.055097111 |
| 7075 | 2.144469  | 2.032485  | PNPLA8       | 1.05509711  |
| 7076 | 52.360809 | 49.629896 | UBE2J2       | 1.055025579 |
| 7077 | 9.5173838 | 9.0234044 | RNA45S5      | 1.054744235 |
| 7078 | 20.091445 | 19.049891 | TAF11        | 1.054675072 |
| 7079 | 3.0236862 | 2.867493  | SYNJ1        | 1.05447032  |
| 7080 | 5.2190554 | 4.9500245 | BAHCC1       | 1.054349404 |
| 7081 | 7.2925801 | 6.9171872 | C1orf131     | 1.054269584 |
| 7082 | 137.65335 | 130.60831 | RANGAP1      | 1.053940254 |
| 7083 | 10.277236 | 9.7552839 | INO80C       | 1.053504512 |
| 7084 | 12.719879 | 12.074713 | ZNF185       | 1.053431167 |
| 7085 | 11.598462 | 11.016827 | TLDC1        | 1.052795081 |
| 7086 | 5.6310721 | 5.3495483 | IFT122       | 1.052625712 |
| 7087 | 22.047785 | 20.952076 | CETN2        | 1.052295968 |
| 7088 | 33.348954 | 31.704839 | CIRBP        | 1.051856889 |
| 7089 | 4.337827  | 4.1241048 | SUCO         | 1.051822671 |
| 7090 | 57.371604 | 54.566737 | RAB8A        | 1.051402494 |
| 7091 | 5.296103  | 5.0386962 | LOC100129361 | 1.051085998 |
| 7092 | 26.926104 | 25.627495 | DNPEP        | 1.05067251  |
| 7093 | 27.338121 | 26.024035 | ATG4B        | 1.050495092 |

|      |           |           |          |             |
|------|-----------|-----------|----------|-------------|
| 7094 | 23.947662 | 22.80673  | PDE6D    | 1.050026101 |
| 7095 | 9.6365459 | 9.1774346 | ARL6IP6  | 1.050026101 |
| 7096 | 9.6887164 | 9.2276635 | ENC1     | 1.049964206 |
| 7097 | 33.033021 | 31.47717  | COASY    | 1.049427932 |
| 7098 | 18.676043 | 17.801512 | CCNC     | 1.049126805 |
| 7099 | 21.382156 | 20.383144 | SH3KBP1  | 1.049011696 |
| 7100 | 26.018963 | 24.804045 | HAT1     | 1.048980606 |
| 7101 | 7.5509646 | 7.1993676 | ABCC5    | 1.048837204 |
| 7102 | 68.03584  | 64.876576 | C7orf50  | 1.048696521 |
| 7103 | 23.084742 | 22.017832 | TROAP    | 1.048456664 |
| 7104 | 45.786006 | 43.674092 | AMOTL2   | 1.048356213 |
| 7105 | 14.148223 | 13.498159 | UBE2J1   | 1.048159486 |
| 7106 | 13.62682  | 13.003087 | SDHAF1   | 1.047968077 |
| 7107 | 22.595367 | 21.591303 | TRABD    | 1.046503174 |
| 7108 | 4.2489218 | 4.0603086 | KIFAP3   | 1.046452942 |
| 7109 | 4.0784516 | 3.8990248 | HIVEP1   | 1.046018368 |
| 7110 | 45.453389 | 43.461346 | C12orf10 | 1.045834808 |
| 7111 | 13.924591 | 13.315473 | HIAT1    | 1.045745113 |
| 7112 | 28.432554 | 27.190525 | RBM23    | 1.04567873  |
| 7113 | 17.626313 | 16.858441 | ASPSCR1  | 1.045548187 |
| 7114 | 12.079207 | 11.553698 | METTL22  | 1.045484004 |
| 7115 | 63.830273 | 61.067362 | ACTR2    | 1.045243651 |
| 7116 | 12.487857 | 11.947424 | ATPAF2   | 1.045234247 |
| 7117 | 2.8751155 | 2.7506901 | KIAA1644 | 1.045234247 |
| 7118 | 159.50061 | 152.60557 | PDLIM7   | 1.045182133 |
| 7119 | 9.3150514 | 8.9129576 | PDE9A    | 1.045113396 |
| 7120 | 5.6008824 | 5.3603151 | ADAM17   | 1.044879328 |
| 7121 | 9.7259854 | 9.308238  | TRIP4    | 1.044879328 |
| 7122 | 7.7389735 | 7.4081626 | VPS33B   | 1.044654912 |
| 7123 | 30.524397 | 29.224438 | ERCC1    | 1.044481935 |
| 7124 | 4.0620579 | 3.8899928 | CNST     | 1.044232744 |
| 7125 | 9.5710082 | 9.1673342 | PRKACB   | 1.044033957 |
| 7126 | 9.1657853 | 8.7810726 | LMO7     | 1.043811578 |
| 7127 | 22.065829 | 21.142764 | BFAR     | 1.043658675 |
| 7128 | 67.889955 | 65.086137 | FDFT1    | 1.043078581 |
| 7129 | 11.792362 | 11.306343 | DOHH     | 1.04298643  |
| 7130 | 14.723878 | 14.118086 | GCAT     | 1.04290892  |
| 7131 | 12.599404 | 12.081463 | MED22    | 1.042870663 |
| 7132 | 7.1232598 | 6.8321304 | NRF1     | 1.042611795 |
| 7133 | 5.2526923 | 5.0386962 | HPS5     | 1.042470539 |
| 7134 | 1.6707246 | 1.602869  | KIAA1109 | 1.04233384  |
| 7135 | 141.84824 | 136.1708  | PRRC2A   | 1.041693495 |
| 7136 | 8.4898976 | 8.1517007 | TRUB1    | 1.041487887 |

|      |           |           |              |             |
|------|-----------|-----------|--------------|-------------|
| 7137 | 7.6561567 | 7.3519277 | SHPK         | 1.041380848 |
| 7138 | 6.7210693 | 6.4552691 | ZBTB40       | 1.04117569  |
| 7139 | 30.253189 | 29.060847 | SH3GLB2      | 1.041029149 |
| 7140 | 21.363229 | 20.521573 | MAPK9        | 1.041013235 |
| 7141 | 21.617033 | 20.769676 | COMMD5       | 1.040797768 |
| 7142 | 14.072955 | 13.523397 | PRR12        | 1.040637535 |
| 7143 | 38.03429  | 36.554873 | CPSF3L       | 1.040471113 |
| 7144 | 13.610601 | 13.096972 | TXNDC11      | 1.039217366 |
| 7145 | 18.42359  | 17.728331 | RMDN3        | 1.039217366 |
| 7146 | 19.504056 | 18.77668  | PMM2         | 1.038738266 |
| 7147 | 8.7045511 | 8.3804467 | AMBRA1       | 1.03867388  |
| 7148 | 34.067133 | 32.809045 | CDH2         | 1.038345779 |
| 7149 | 10.836909 | 10.447969 | PTPRK        | 1.037226403 |
| 7150 | 541.26593 | 522.08562 | GNAS         | 1.036737861 |
| 7151 | 32.863506 | 31.740488 | GLUL         | 1.035381221 |
| 7152 | 286.53346 | 276.99029 | FKBP1A       | 1.034453093 |
| 7153 | 0.0217581 | 0.0210428 | NRXN1        | 1.033995207 |
| 7154 | 0.0325751 | 0.0315042 | DNAH6        | 1.033995196 |
| 7155 | 0.040364  | 0.039037  | LOC100996295 | 1.03399519  |
| 7156 | 0.0201527 | 0.0194902 | COL4A4       | 1.033995188 |
| 7157 | 0.0605285 | 0.0585384 | ADIPOQ-AS1   | 1.033995184 |
| 7158 | 0.0560063 | 0.054165  | NEFH         | 1.033995183 |
| 7159 | 0.0168731 | 0.0163183 | DNAH3        | 1.033995182 |
| 7160 | 0.0190563 | 0.0184298 | ALPK3        | 1.033995181 |
| 7161 | 0.026568  | 0.0256945 | AVPR1A       | 1.033995181 |
| 7162 | 0.0758644 | 0.0733702 | LOC401010    | 1.03399518  |
| 7163 | 0.0618213 | 0.0597887 | C6orf132     | 1.03399518  |
| 7164 | 0.062246  | 0.0601995 | LRRC66       | 1.03399518  |
| 7165 | 0.064922  | 0.0627875 | FAM13A-AS1   | 1.033995179 |
| 7166 | 0.0416716 | 0.0403015 | LOC100130872 | 1.033995179 |
| 7167 | 0.0603357 | 0.058352  | TLL6         | 1.033995178 |
| 7168 | 0.0683501 | 0.0661029 | DUOXA1       | 1.033995178 |
| 7169 | 0.0456616 | 0.0441604 | SLC6A14      | 1.033995177 |
| 7170 | 0.0587537 | 0.0568221 | C11orf44     | 1.033995177 |
| 7171 | 0.0385354 | 0.0372685 | GALNT4       | 1.033995177 |
| 7172 | 0.0624137 | 0.0603617 | TVP23A       | 1.033995177 |
| 7173 | 0.0713208 | 0.068976  | LOC283688    | 1.033995177 |
| 7174 | 0.0582122 | 0.0562983 | LRRC37A11P   | 1.033995177 |
| 7175 | 0.0619131 | 0.0598776 | SCG3         | 1.033995176 |
| 7176 | 0.086437  | 0.0835951 | HYAL4        | 1.033995176 |
| 7177 | 0.0815335 | 0.0788528 | UBASH3A      | 1.033995176 |
| 7178 | 0.0609712 | 0.0589666 | CELF6        | 1.033995176 |
| 7179 | 0.0614748 | 0.0594536 | POSTN        | 1.033995176 |

|      |           |           |              |             |
|------|-----------|-----------|--------------|-------------|
| 7180 | 0.0779355 | 0.0753732 | LOC400655    | 1.033995175 |
| 7181 | 0.0748024 | 0.0723431 | MAP4K1       | 1.033995175 |
| 7182 | 0.0907663 | 0.0877822 | MS4A10       | 1.033995175 |
| 7183 | 0.0907663 | 0.0877822 | SERPINF2     | 1.033995175 |
| 7184 | 0.0959924 | 0.0928364 | ZNF681       | 1.033995175 |
| 7185 | 0.1309865 | 0.12668   | LOC440896    | 1.033995175 |
| 7186 | 0.1155849 | 0.1117847 | SLC16A11     | 1.033995175 |
| 7187 | 0.0774144 | 0.0748692 | MRS2P2       | 1.033995174 |
| 7188 | 0.0688128 | 0.0665504 | LOC100128164 | 1.033995174 |
| 7189 | 0.1035268 | 0.1001231 | ZNF843       | 1.033995174 |
| 7190 | 0.0561421 | 0.0542963 | ZNF418       | 1.033995174 |
| 7191 | 0.0736134 | 0.0711932 | FGF14        | 1.033995174 |
| 7192 | 0.1368349 | 0.1323361 | GIMAP2       | 1.033995174 |
| 7193 | 0.0624886 | 0.0604341 | TMEM105      | 1.033995174 |
| 7194 | 0.0978401 | 0.0946234 | PP2D1        | 1.033995174 |
| 7195 | 0.0978401 | 0.0946234 | LOC729020    | 1.033995174 |
| 7196 | 0.0880065 | 0.0851131 | MCHR2        | 1.033995174 |
| 7197 | 0.0665388 | 0.0643512 | ZNF345       | 1.033995174 |
| 7198 | 0.0902162 | 0.0872502 | RASGRP2      | 1.033995174 |
| 7199 | 0.0644003 | 0.062283  | HEATR8-TTC4  | 1.033995173 |
| 7200 | 0.0805564 | 0.0779079 | C9orf163     | 1.033995173 |
| 7201 | 0.0677942 | 0.0655653 | CAGE1        | 1.033995173 |
| 7202 | 0.1337609 | 0.1293632 | C6orf164     | 1.033995173 |
| 7203 | 0.0732254 | 0.0708179 | RAG2         | 1.033995173 |
| 7204 | 0.0930563 | 0.0899968 | ZNF667       | 1.033995173 |
| 7205 | 0.1412399 | 0.1365963 | CPT1B        | 1.033995173 |
| 7206 | 0.1186785 | 0.1147767 | PFKFB1       | 1.033995173 |
| 7207 | 0.1561045 | 0.1509722 | ARL14        | 1.033995173 |
| 7208 | 0.0520348 | 0.0503241 | SIAH3        | 1.033995173 |
| 7209 | 0.1377393 | 0.1332107 | WDR63        | 1.033995172 |
| 7210 | 0.1161647 | 0.1123455 | UBOX5-AS1    | 1.033995172 |
| 7211 | 0.1084849 | 0.1049182 | SLC22A1      | 1.033995172 |
| 7212 | 0.2588814 | 0.25037   | SRRM5        | 1.033995172 |
| 7213 | 0.1334184 | 0.1290319 | LOC100129046 | 1.033995172 |
| 7214 | 0.1154568 | 0.1116609 | LRRC73       | 1.033995172 |
| 7215 | 0.1362088 | 0.1317306 | PRR15L       | 1.033995172 |
| 7216 | 0.131982  | 0.1276427 | CRLF2        | 1.033995172 |
| 7217 | 0.1356768 | 0.131216  | ERP27        | 1.033995172 |
| 7218 | 0.1061097 | 0.1026211 | PLD4         | 1.033995172 |
| 7219 | 0.1824066 | 0.1764095 | CES5A        | 1.033995171 |
| 7220 | 0.1335038 | 0.1291146 | CA9          | 1.033995171 |
| 7221 | 0.2336317 | 0.2259505 | NSUN5P2      | 1.033995171 |
| 7222 | 0.227759  | 0.2202709 | SPDYA        | 1.033995171 |



|      |           |           |                |             |
|------|-----------|-----------|----------------|-------------|
| 7223 | 0.2094467 | 0.2025607 | TP53TG5        | 1.033995171 |
| 7224 | 0.0487941 | 0.0471898 | DSC1           | 1.033995171 |
| 7225 | 0.0602659 | 0.0582845 | LGR6           | 1.033995171 |
| 7226 | 0.0655757 | 0.0634197 | ZSCAN23        | 1.033995171 |
| 7227 | 0.1000478 | 0.0967584 | HCG4           | 1.033995171 |
| 7228 | 0.0949861 | 0.0918632 | RAG1           | 1.033995171 |
| 7229 | 0.2238448 | 0.2164853 | LOC100507600   | 1.033995171 |
| 7230 | 0.1053587 | 0.1018948 | TMEM191A       | 1.033995171 |
| 7231 | 0.2293886 | 0.2218468 | CNTD2          | 1.033995171 |
| 7232 | 0.2450798 | 0.2370222 | MLK7-AS1       | 1.033995171 |
| 7233 | 0.0927457 | 0.0896964 | GNG12-AS1      | 1.033995171 |
| 7234 | 0.2210968 | 0.2138277 | NLRC3          | 1.033995171 |
| 7235 | 0.1569667 | 0.1518061 | CARNS1         | 1.033995171 |
| 7236 | 0.3728077 | 0.3605507 | LOC730091      | 1.033995171 |
| 7237 | 0.1242692 | 0.1201836 | BMPER          | 1.033995171 |
| 7238 | 0.2346841 | 0.2269683 | PGAM2          | 1.033995171 |
| 7239 | 0.0831934 | 0.0804582 | EXOC3L1        | 1.033995171 |
| 7240 | 0.201742  | 0.1951092 | NPW            | 1.033995171 |
| 7241 | 0.3293986 | 0.3185688 | NTN5           | 1.033995171 |
| 7242 | 0.1293925 | 0.1251384 | NPAP1          | 1.033995171 |
| 7243 | 0.0444633 | 0.0430015 | NKPD1          | 1.033995171 |
| 7244 | 0.221466  | 0.2141847 | HNRNPKP3       | 1.033995171 |
| 7245 | 0.2434574 | 0.2354531 | LOC144486      | 1.03399517  |
| 7246 | 0.0844749 | 0.0816975 | SERPINA10      | 1.03399517  |
| 7247 | 0.1037846 | 0.1003724 | RPL17-C18orf32 | 1.03399517  |
| 7248 | 0.2512351 | 0.2429751 | CNTD1          | 1.03399517  |
| 7249 | 0.3780245 | 0.365596  | ATAD3C         | 1.03399517  |
| 7250 | 0.0355813 | 0.0344114 | VWA2           | 1.03399517  |
| 7251 | 0.1754205 | 0.1696531 | SH2D3A         | 1.03399517  |
| 7252 | 0.1689497 | 0.1633951 | HIPK4          | 1.03399517  |
| 7253 | 0.2155114 | 0.2084259 | RDH12          | 1.03399517  |
| 7254 | 0.1829671 | 0.1769516 | C12orf60       | 1.03399517  |
| 7255 | 0.2998554 | 0.2899969 | LCE1C          | 1.03399517  |
| 7256 | 0.6251985 | 0.6046435 | WFDC3          | 1.03399517  |
| 7257 | 0.3126774 | 0.3023974 | MYLK3          | 1.03399517  |
| 7258 | 0.4651775 | 0.4498836 | HIST2H2AB      | 1.03399517  |
| 7259 | 0.1763109 | 0.1705143 | THRSP          | 1.03399517  |
| 7260 | 0.3526218 | 0.3410285 | FCER1G         | 1.03399517  |
| 7261 | 0.3039001 | 0.2939086 | LOC100128338   | 1.03399517  |
| 7262 | 0.6105454 | 0.5904722 | LOC100507634   | 1.03399517  |
| 7263 | 0.0420754 | 0.0406921 | SLC4A1         | 1.03399517  |
| 7264 | 0.1559877 | 0.1508592 | C22orf43       | 1.03399517  |
| 7265 | 0.5678461 | 0.5491767 | HIST1H4D       | 1.03399517  |

|      |           |           |              |             |
|------|-----------|-----------|--------------|-------------|
| 7266 | 0.1135692 | 0.1098353 | PTCD1        | 1.03399517  |
| 7267 | 0.1135692 | 0.1098353 | CCDC74B-AS1  | 1.03399517  |
| 7268 | 0.5529934 | 0.5348123 | LOC100130954 | 1.03399517  |
| 7269 | 0.4003833 | 0.3872197 | EPHA10       | 1.03399517  |
| 7270 | 0.3964983 | 0.3834624 | DAPK2        | 1.03399517  |
| 7271 | 0.3133827 | 0.3030795 | TSSK4        | 1.03399517  |
| 7272 | 0.4288056 | 0.4147075 | NCRUPAR      | 1.03399517  |
| 7273 | 0.0771279 | 0.0745921 | KCNH1        | 1.03399517  |
| 7274 | 0.3329066 | 0.3219614 | PPIAP30      | 1.03399517  |
| 7275 | 0.1454796 | 0.1406966 | ENO4         | 1.03399517  |
| 7276 | 0.2918761 | 0.2822799 | ANKRD61      | 1.03399517  |
| 7277 | 0.197348  | 0.1908597 | LOC100289561 | 1.03399517  |
| 7278 | 0.0704886 | 0.0681711 | NUP210L      | 1.03399517  |
| 7279 | 0.1542557 | 0.1491842 | SPIN2A       | 1.03399517  |
| 7280 | 0.4872942 | 0.4712732 | LOC100507577 | 1.03399517  |
| 7281 | 0.2004805 | 0.1938892 | STAU2-AS1    | 1.033995169 |
| 7282 | 0.141672  | 0.1370142 | ABHD1        | 1.033995169 |
| 7283 | 0.272062  | 0.2631173 | TTC25        | 1.033995169 |
| 7284 | 0.2415759 | 0.2336335 | HYAL1        | 1.033995169 |
| 7285 | 0.1348864 | 0.1304517 | RASA4CP      | 1.033995169 |
| 7286 | 0.2894438 | 0.2799276 | C1orf189     | 1.033995169 |
| 7287 | 0.1736663 | 0.1679565 | SGPP2        | 1.033995169 |
| 7288 | 0.1395844 | 0.1349952 | FLJ25363     | 1.033995169 |
| 7289 | 0.5942952 | 0.5747562 | FAM132A      | 1.033995169 |
| 7290 | 0.1630669 | 0.1577057 | TCTEX1D4     | 1.033995169 |
| 7291 | 0.8683313 | 0.8397827 | LOC100287177 | 1.033995169 |
| 7292 | 0.2067455 | 0.1999483 | CCDC73       | 1.033995169 |
| 7293 | 0.195987  | 0.1895434 | ZNF235       | 1.033995169 |
| 7294 | 0.5070547 | 0.4903841 | QRFP         | 1.033995169 |
| 7295 | 0.1455304 | 0.1407457 | FAM66B       | 1.033995169 |
| 7296 | 0.1017079 | 0.098364  | TRIM31       | 1.033995169 |
| 7297 | 0.6524718 | 0.6310202 | CHMP3        | 1.033995169 |
| 7298 | 0.1240473 | 0.119969  | LOC727924    | 1.033995169 |
| 7299 | 0.1904061 | 0.184146  | TFAP2E       | 1.033995169 |
| 7300 | 0.0565535 | 0.0546941 | IGF1         | 1.033995169 |
| 7301 | 0.1815327 | 0.1755643 | APOD         | 1.033995169 |
| 7302 | 1.2126322 | 1.1727639 | C20orf196    | 1.033995169 |
| 7303 | 0.6263617 | 0.6057685 | MTCP1        | 1.033995169 |
| 7304 | 0.1206714 | 0.116704  | KIAA1984     | 1.033995169 |
| 7305 | 0.1038363 | 0.1004224 | LIN28A       | 1.033995169 |
| 7306 | 0.5154151 | 0.4984695 | SIRT4        | 1.033995169 |
| 7307 | 0.1492833 | 0.1443752 | ZBTB7C       | 1.033995169 |
| 7308 | 0.6544401 | 0.6329237 | LOC100131257 | 1.033995169 |

|      |           |           |              |             |
|------|-----------|-----------|--------------|-------------|
| 7309 | 0.0961696 | 0.0930078 | LOC100653515 | 1.033995169 |
| 7310 | 0.1111464 | 0.1074922 | DNAJB13      | 1.033995169 |
| 7311 | 0.1111464 | 0.1074922 | FAM181B      | 1.033995169 |
| 7312 | 0.250681  | 0.2424393 | TMC4         | 1.033995169 |
| 7313 | 0.6179886 | 0.5976707 | ZNF136       | 1.033995169 |
| 7314 | 0.3283359 | 0.3175411 | ANKAR        | 1.033995169 |
| 7315 | 0.4992668 | 0.4828521 | ANKRD20A9P   | 1.033995169 |
| 7316 | 0.6512484 | 0.629837  | GPR68        | 1.033995169 |
| 7317 | 0.3723636 | 0.3601212 | COX6B2       | 1.033995169 |
| 7318 | 0.7923935 | 0.7663416 | FLJ27354     | 1.033995169 |
| 7319 | 0.995539  | 0.9628082 | LOC100144603 | 1.033995169 |
| 7320 | 0.2003841 | 0.193796  | TTLL3        | 1.033995169 |
| 7321 | 0.2003841 | 0.193796  | DPPA3        | 1.033995169 |
| 7322 | 1.8309    | 1.7707046 | ZBTB26       | 1.033995169 |
| 7323 | 0.8975    | 0.8679925 | HOXA-AS4     | 1.033995169 |
| 7324 | 0.3929101 | 0.3799922 | LOC644961    | 1.033995169 |
| 7325 | 12.048233 | 11.652117 | ALG12        | 1.033995169 |
| 7326 | 0.1738836 | 0.1681667 | LOC100506207 | 1.033995169 |
| 7327 | 0.4796306 | 0.4638616 | EPS8L1       | 1.033995169 |
| 7328 | 0.3398742 | 0.3286999 | GLUD1P7      | 1.033995169 |
| 7329 | 0.2835367 | 0.2742148 | ADAMTS4      | 1.033995169 |
| 7330 | 0.2624679 | 0.2538386 | LOC389247    | 1.033995169 |
| 7331 | 0.9580291 | 0.9265315 | ZNF554       | 1.033995169 |
| 7332 | 0.5361908 | 0.5185622 | RDM1         | 1.033995169 |
| 7333 | 0.3656132 | 0.3535927 | KATNAL2      | 1.033995169 |
| 7334 | 2.7360985 | 2.6461424 | HIST2H3D     | 1.033995169 |
| 7335 | 0.3020283 | 0.2920983 | GSTTP2       | 1.033995169 |
| 7336 | 0.3902612 | 0.3774304 | RDH14        | 1.033995169 |
| 7337 | 10.714325 | 10.362064 | AFMID        | 1.033995169 |
| 7338 | 0.6693774 | 0.64737   | TNFRSF13C    | 1.033995169 |
| 7339 | 0.2549229 | 0.2465417 | HPX          | 1.033995169 |
| 7340 | 1.169589  | 1.1311359 | BMS1P4       | 1.033995169 |
| 7341 | 0.8369458 | 0.8094291 | HIST1H2AG    | 1.033995169 |
| 7342 | 0.1076444 | 0.1041053 | CNBD2        | 1.033995169 |
| 7343 | 0.0594408 | 0.0574866 | SLA          | 1.033995169 |
| 7344 | 1.9330342 | 1.8694809 | SLC25A16     | 1.033995169 |
| 7345 | 0.2260298 | 0.2185985 | WAS          | 1.033995169 |
| 7346 | 4.5322485 | 4.3832395 | GALM         | 1.033995169 |
| 7347 | 2.1708281 | 2.0994567 | RNY4         | 1.033995169 |
| 7348 | 0.102458  | 0.0990894 | LOC100270804 | 1.033995169 |
| 7349 | 2.3389394 | 2.2620409 | ZNF783       | 1.033995169 |
| 7350 | 46.747896 | 45.210943 | SSNA1        | 1.033995169 |
| 7351 | 0.3618047 | 0.3499095 | LOC284009    | 1.033995169 |

|      |           |           |              |             |
|------|-----------|-----------|--------------|-------------|
| 7352 | 12.715644 | 12.297585 | ZC3H12A      | 1.033995169 |
| 7353 | 1.6082277 | 1.5553532 | DUSP28       | 1.033995169 |
| 7354 | 3.6019667 | 3.483543  | FLJ20021     | 1.033995169 |
| 7355 | 1.4057302 | 1.3595133 | HERC2P7      | 1.033995169 |
| 7356 | 32.696424 | 31.621447 | HERPUD1      | 1.033995169 |
| 7357 | 2.0633614 | 1.9955232 | HFE          | 1.033995169 |
| 7358 | 0.4801832 | 0.464396  | ZNRF3-AS1    | 1.033995169 |
| 7359 | 0.2912642 | 0.2816881 | LOC100289511 | 1.033995169 |
| 7360 | 1.9053669 | 1.8427232 | MCEE         | 1.033995169 |
| 7361 | 0.1885968 | 0.1823962 | CTSL1P2      | 1.033995169 |
| 7362 | 0.4214348 | 0.4075791 | MFAP4        | 1.033995169 |
| 7363 | 4.9279654 | 4.7659462 | SLC12A8      | 1.033995169 |
| 7364 | 5.7525583 | 5.5634287 | CDKN2AIP     | 1.033995169 |
| 7365 | 5.2854946 | 5.1117208 | C21orf119    | 1.033995169 |
| 7366 | 0.6065178 | 0.586577  | LOC100129518 | 1.033995169 |
| 7367 | 1.3485731 | 1.3042354 | PGBD4        | 1.033995169 |
| 7368 | 1.1504704 | 1.1126458 | PHOSPHO2     | 1.033995169 |
| 7369 | 1.4487278 | 1.4010973 | LINC00842    | 1.033995169 |
| 7370 | 7.1639345 | 6.9284023 | CWC25        | 1.033995169 |
| 7371 | 4.8092192 | 4.6511042 | SNORA61      | 1.033995169 |
| 7372 | 0.6465341 | 0.6252777 | ZNF700       | 1.033995169 |
| 7373 | 2.4809464 | 2.3993791 | RNY5         | 1.033995169 |
| 7374 | 6.6401802 | 6.4218677 | CCDC23       | 1.033995169 |
| 7375 | 0.4671682 | 0.4518089 | ZC3H12D      | 1.033995169 |
| 7376 | 0.3399666 | 0.3287893 | FLJ14107     | 1.033995169 |
| 7377 | 4.8111671 | 4.652988  | C9orf156     | 1.033995169 |
| 7378 | 3.7516751 | 3.6283294 | XPA          | 1.033995168 |
| 7379 | 3.3787622 | 3.2676769 | IPP          | 1.033995168 |
| 7380 | 4.8465    | 4.6871592 | LOC642852    | 1.033995168 |
| 7381 | 4.8465    | 4.6871592 | SNORD35A     | 1.033995168 |
| 7382 | 1.5552202 | 1.5040884 | SNORA52      | 1.033995168 |
| 7383 | 1.5552202 | 1.5040884 | SNORA16A     | 1.033995168 |
| 7384 | 0.9322758 | 0.9016249 | C14orf28     | 1.033995168 |
| 7385 | 0.1520609 | 0.1470615 | LOC284551    | 1.033995168 |
| 7386 | 0.2787953 | 0.2696292 | C1orf210     | 1.033995168 |
| 7387 | 1.5566723 | 1.5054928 | H3F3C        | 1.033995168 |
| 7388 | 0.2858704 | 0.2764717 | MPL          | 1.033995168 |
| 7389 | 21.088773 | 20.395427 | SLC35E1      | 1.033995168 |
| 7390 | 9.1103607 | 8.8108348 | IFI27L1      | 1.033995168 |
| 7391 | 4.1191039 | 3.9836781 | ASTN2        | 1.033995168 |
| 7392 | 0.0725878 | 0.0702013 | GRIK4        | 1.033995168 |
| 7393 | 0.4004602 | 0.3872941 | LOC646999    | 1.033995168 |
| 7394 | 0.4539195 | 0.4389958 | C21orf62     | 1.033995168 |

|      |           |           |                |             |
|------|-----------|-----------|----------------|-------------|
| 7395 | 7.6058212 | 7.3557608 | SNORA67        | 1.033995168 |
| 7396 | 2.5876923 | 2.5026155 | KIF18A         | 1.033995168 |
| 7397 | 93.628761 | 90.550482 | PSMA6          | 1.033995168 |
| 7398 | 2.7020017 | 2.6131667 | LIFR           | 1.033995168 |
| 7399 | 1.3217727 | 1.2783162 | HIST1H3H       | 1.033995168 |
| 7400 | 0.6636927 | 0.6418721 | DKFZP686I15217 | 1.033995168 |
| 7401 | 2.0486731 | 1.9813178 | FER            | 1.033995168 |
| 7402 | 0.6862018 | 0.6636412 | POLI           | 1.033995168 |
| 7403 | 5.1909961 | 5.0203291 | C5orf55        | 1.033995168 |
| 7404 | 7.3291819 | 7.0882167 | NEK2           | 1.033995168 |
| 7405 | 0.1232404 | 0.1191886 | ZNF582-AS1     | 1.033995168 |
| 7406 | 2.7343889 | 2.6444891 | MORC2-AS1      | 1.033995168 |
| 7407 | 0.2083995 | 0.2015478 | C16orf3        | 1.033995168 |
| 7408 | 3.8316558 | 3.7056805 | HIBCH          | 1.033995168 |
| 7409 | 1.5669135 | 1.5153973 | SNORA68        | 1.033995168 |
| 7410 | 0.4415244 | 0.4270082 | HIST1H3B       | 1.033995168 |
| 7411 | 3.94447   | 3.8147858 | TMEM212        | 1.033995168 |
| 7412 | 1.7512563 | 1.6936794 | RNU5E-1        | 1.033995168 |
| 7413 | 7.7884298 | 7.5323657 | LOC148413      | 1.033995168 |
| 7414 | 0.3917284 | 0.3788493 | LCTL           | 1.033995168 |
| 7415 | 1.2569331 | 1.2156082 | DBP            | 1.033995168 |
| 7416 | 0.368197  | 0.3560916 | LINC00568      | 1.033995168 |
| 7417 | 2.083995  | 2.0154785 | RNU5D-1        | 1.033995168 |
| 7418 | 2.1583377 | 2.087377  | PMS2CL         | 1.033995168 |
| 7419 | 0.101857  | 0.0985082 | LOC341056      | 1.033995168 |
| 7420 | 0.1708193 | 0.1652032 | OTX2-AS1       | 1.033995168 |
| 7421 | 2.1613223 | 2.0902635 | CCDC142        | 1.033995168 |
| 7422 | 0.9165454 | 0.8864116 | AARD           | 1.033995168 |
| 7423 | 0.4747141 | 0.4591067 | LINC00115      | 1.033995168 |
| 7424 | 0.3164761 | 0.3060711 | ACY3           | 1.033995168 |
| 7425 | 0.4191041 | 0.405325  | SYTL1          | 1.033995168 |
| 7426 | 2.5205708 | 2.4377007 | MEF2C          | 1.033995168 |
| 7427 | 0.6682531 | 0.6462826 | METTL20        | 1.033995168 |
| 7428 | 0.5343577 | 0.5167894 | FAM215A        | 1.033995168 |
| 7429 | 1.0459197 | 1.0115325 | HOXB-AS1       | 1.033995168 |
| 7430 | 11.094043 | 10.729299 | LZIC           | 1.033995168 |
| 7431 | 3.0228596 | 2.9234756 | BLZF1          | 1.033995168 |
| 7432 | 0.5262614 | 0.5089592 | PFN4           | 1.033995168 |
| 7433 | 1.5787841 | 1.5268776 | SNORA18        | 1.033995168 |
| 7434 | 2.3681761 | 2.2903164 | MIR1227        | 1.033995168 |
| 7435 | 1.9293623 | 1.8659297 | MID2           | 1.033995168 |
| 7436 | 0.1295211 | 0.1252628 | LOC100507053   | 1.033995168 |
| 7437 | 3.1816718 | 3.0770664 | LOC439994      | 1.033995168 |

|      |           |           |               |             |
|------|-----------|-----------|---------------|-------------|
| 7438 | 0.3734758 | 0.3611969 | FXYD1         | 1.033995168 |
| 7439 | 2.9376381 | 2.8410559 | KAT2B         | 1.033995168 |
| 7440 | 0.0886806 | 0.085765  | UBQLNL        | 1.033995168 |
| 7441 | 0.1496048 | 0.1446862 | C9orf66       | 1.033995168 |
| 7442 | 0.326645  | 0.3159057 | MEIG1         | 1.033995168 |
| 7443 | 0.5633803 | 0.5448578 | GLUD1P3       | 1.033995168 |
| 7444 | 14.854472 | 14.366094 | CENPA         | 1.033995168 |
| 7445 | 1.9516488 | 1.8874835 | CDADC1        | 1.033995168 |
| 7446 | 1.2258794 | 1.1855756 | LOC100130987  | 1.033995168 |
| 7447 | 1.6616571 | 1.607026  | OSCP1         | 1.033995168 |
| 7448 | 0.1034497 | 0.1000486 | ZNF204P       | 1.033995168 |
| 7449 | 0.3615536 | 0.3496666 | TBX19         | 1.033995168 |
| 7450 | 0.3377626 | 0.3266578 | MIR181A2HG    | 1.033995168 |
| 7451 | 0.8037003 | 0.7772767 | ZNF432        | 1.033995168 |
| 7452 | 0.1575204 | 0.1523415 | ZFP42         | 1.033995168 |
| 7453 | 0.8093184 | 0.7827101 | BOLA2         | 1.033995168 |
| 7454 | 1.2372002 | 1.1965242 | LYZ           | 1.033995168 |
| 7455 | 0.2179911 | 0.2108241 | LOC100216479  | 1.033995168 |
| 7456 | 1.6539643 | 1.5995861 | SNORD22       | 1.033995168 |
| 7457 | 0.1617695 | 0.1564509 | LOC400891     | 1.033995168 |
| 7458 | 0.0724616 | 0.0700792 | TYRP1         | 1.033995168 |
| 7459 | 1.2565    | 1.2151894 | ZKSCAN7       | 1.033995168 |
| 7460 | 1.0215662 | 0.9879796 | C7orf61       | 1.033995168 |
| 7461 | 0.2466266 | 0.2385182 | PTK6          | 1.033995168 |
| 7462 | 0.7939029 | 0.7678013 | LOC100128573  | 1.033995168 |
| 7463 | 0.407561  | 0.3941614 | DFNB59        | 1.033995168 |
| 7464 | 0.4193149 | 0.4055289 | ZNF487P       | 1.033995168 |
| 7465 | 0.4560164 | 0.4410237 | HP07349       | 1.033995168 |
| 7466 | 0.1140041 | 0.1102559 | KRT8P41       | 1.033995168 |
| 7467 | 1.5035096 | 1.4540779 | SPRN          | 1.033995168 |
| 7468 | 0.3820339 | 0.3694736 | GNMT          | 1.033995168 |
| 7469 | 1.3384682 | 1.2944627 | CCDC74A       | 1.033995168 |
| 7470 | 1.1937778 | 1.1545294 | ANG           | 1.033995168 |
| 7471 | 1.4519    | 1.4041651 | BBS9          | 1.033995168 |
| 7472 | 0.0700738 | 0.06777   | SFRP4         | 1.033995168 |
| 7473 | 0.1922505 | 0.1859297 | GGN           | 1.033995168 |
| 7474 | 0.0775873 | 0.0750364 | C14orf182     | 1.033995168 |
| 7475 | 0.1167504 | 0.112912  | ATP2A1        | 1.033995168 |
| 7476 | 1.132606  | 1.0953687 | DKFZP586I1420 | 1.033995168 |
| 7477 | 0.0817787 | 0.0790901 | NWD1          | 1.033995168 |
| 7478 | 0.1949481 | 0.1885387 | CYP46A1       | 1.033995168 |
| 7479 | 0.1029642 | 0.099579  | IGSF9         | 1.033995168 |
| 7480 | 0.9021623 | 0.8725015 | LUST          | 1.033995168 |

|      |           |           |              |             |
|------|-----------|-----------|--------------|-------------|
| 7481 | 0.1997599 | 0.1931923 | MYO1F        | 1.033995168 |
| 7482 | 0.0607756 | 0.0587774 | LOC339524    | 1.033995168 |
| 7483 | 0.5744198 | 0.5555343 | TMEFF2       | 1.033995168 |
| 7484 | 0.1013616 | 0.0980291 | LINC00637    | 1.033995168 |
| 7485 | 12.895439 | 12.471469 | TRIM11       | 1.033995168 |
| 7486 | 0.1498199 | 0.1448942 | PRSS22       | 1.033995168 |
| 7487 | 0.3609691 | 0.3491014 | DAND5        | 1.033995168 |
| 7488 | 0.6360107 | 0.6151002 | NEK5         | 1.033995168 |
| 7489 | 0.0806812 | 0.0780286 | MYCBP        | 1.033995168 |
| 7490 | 0.3361282 | 0.3250772 | RPL23AP32    | 1.033995168 |
| 7491 | 0.4253051 | 0.4113221 | LOC729739    | 1.033995168 |
| 7492 | 0.059799  | 0.057833  | HLA-DOA      | 1.033995168 |
| 7493 | 0.4237485 | 0.4098167 | NLGN1        | 1.033995168 |
| 7494 | 0.0848705 | 0.0820802 | C9orf47      | 1.033995168 |
| 7495 | 0.1399594 | 0.1353579 | CCBP2        | 1.033995168 |
| 7496 | 0.2492817 | 0.2410859 | C6orf123     | 1.033995168 |
| 7497 | 0.5788875 | 0.5598551 | RPSAP9       | 1.033995168 |
| 7498 | 0.1929625 | 0.1866184 | C8orf74      | 1.033995168 |
| 7499 | 0.1195637 | 0.1156327 | LINC00221    | 1.033995168 |
| 7500 | 0.2727742 | 0.2638061 | LOC100507118 | 1.033995168 |
| 7501 | 0.6392623 | 0.6182449 | UNC5B-AS1    | 1.033995168 |
| 7502 | 0.6392623 | 0.6182449 | ASAH2B       | 1.033995168 |
| 7503 | 0.5375739 | 0.5198999 | IL18         | 1.033995168 |
| 7504 | 0.5435563 | 0.5256856 | LOC653160    | 1.033995168 |
| 7505 | 0.1007247 | 0.0974132 | FFAR2        | 1.033995168 |
| 7506 | 0.3924661 | 0.3795628 | TEX21P       | 1.033995168 |
| 7507 | 0.1097995 | 0.1061896 | RAD9B        | 1.033995167 |
| 7508 | 0.1599791 | 0.1547194 | LOC100289495 | 1.033995167 |
| 7509 | 0.2682104 | 0.2593923 | B3GNT4       | 1.033995167 |
| 7510 | 0.1683356 | 0.1628012 | CORT         | 1.033995167 |
| 7511 | 0.3366712 | 0.3256023 | SCGB1B2P     | 1.033995167 |
| 7512 | 0.0678605 | 0.0656294 | MALL         | 1.033995167 |
| 7513 | 0.2598498 | 0.2513065 | HIATL2       | 1.033995167 |
| 7514 | 0.5971332 | 0.577501  | MRPL45P2     | 1.033995167 |
| 7515 | 0.1940405 | 0.1876609 | LOC643669    | 1.033995167 |
| 7516 | 0.5209988 | 0.5038696 | PRR7-AS1     | 1.033995167 |
| 7517 | 0.1223002 | 0.1182793 | NEURL3       | 1.033995167 |
| 7518 | 0.3669005 | 0.3548378 | ADAM1A       | 1.033995167 |
| 7519 | 0.2812409 | 0.2719944 | C20orf141    | 1.033995167 |
| 7520 | 0.2580266 | 0.2495434 | PRODH        | 1.033995167 |
| 7521 | 0.6382833 | 0.6172982 | RPL13AP6     | 1.033995167 |
| 7522 | 0.1010667 | 0.0977439 | SHE          | 1.033995167 |
| 7523 | 0.5281667 | 0.5108019 | ISPD         | 1.033995167 |

|      |           |           |              |             |
|------|-----------|-----------|--------------|-------------|
| 7524 | 0.2162942 | 0.209183  | HMGN2P46     | 1.033995167 |
| 7525 | 0.4792997 | 0.4635415 | DDX39B       | 1.033995167 |
| 7526 | 0.2135241 | 0.2065039 | LOC100289509 | 1.033995167 |
| 7527 | 0.0572841 | 0.0554007 | RUFY4        | 1.033995167 |
| 7528 | 0.0667305 | 0.0645366 | LOC100505776 | 1.033995167 |
| 7529 | 0.1720888 | 0.1664309 | CRTAM        | 1.033995167 |
| 7530 | 0.0429247 | 0.0415135 | FAT2         | 1.033995167 |
| 7531 | 0.3811024 | 0.3685727 | ANP32A-IT1   | 1.033995167 |
| 7532 | 0.2453683 | 0.2373012 | ZDHHC8P1     | 1.033995167 |
| 7533 | 0.2417628 | 0.2338142 | WDR88        | 1.033995167 |
| 7534 | 0.4136279 | 0.4000288 | CCDC157      | 1.033995167 |
| 7535 | 0.2541457 | 0.2457901 | PATE2        | 1.033995167 |
| 7536 | 0.0658867 | 0.0637205 | PROSER2-AS1  | 1.033995167 |
| 7537 | 0.162685  | 0.1573363 | SULT2B1      | 1.033995167 |
| 7538 | 0.0775007 | 0.0749527 | HHLA2        | 1.033995167 |
| 7539 | 0.1681998 | 0.1626698 | GLTPD2       | 1.033995167 |
| 7540 | 0.3228497 | 0.3122352 | HHIPL2       | 1.033995167 |
| 7541 | 0.3269867 | 0.3162362 | DNAJC28      | 1.033995167 |
| 7542 | 0.2285709 | 0.221056  | SLC9A9       | 1.033995167 |
| 7543 | 0.2032175 | 0.1965362 | LOC152225    | 1.033995167 |
| 7544 | 0.1880862 | 0.1819024 | LOC284260    | 1.033995166 |
| 7545 | 0.0922938 | 0.0892595 | GNN          | 1.033995166 |
| 7546 | 0.1877473 | 0.1815746 | LOC442028    | 1.033995166 |
| 7547 | 0.237267  | 0.2294662 | GGT6         | 1.033995166 |
| 7548 | 0.1705397 | 0.1649328 | LINC00578    | 1.033995166 |
| 7549 | 0.132654  | 0.1282927 | SLC15A1      | 1.033995166 |
| 7550 | 0.2536817 | 0.2453413 | APOBEC2      | 1.033995166 |
| 7551 | 0.1951306 | 0.1887152 | ZNF790-AS1   | 1.033995166 |
| 7552 | 0.0935366 | 0.0904613 | LOC100130894 | 1.033995166 |
| 7553 | 0.1870732 | 0.1809227 | CRYAA        | 1.033995166 |
| 7554 | 0.1073394 | 0.1038104 | NLRP12       | 1.033995166 |
| 7555 | 0.2553915 | 0.2469949 | HAVCR2       | 1.033995166 |
| 7556 | 0.115329  | 0.1115373 | C3orf35      | 1.033995166 |
| 7557 | 0.074455  | 0.0720071 | ASB11        | 1.033995166 |
| 7558 | 0.14891   | 0.1440142 | CD300LG      | 1.033995166 |
| 7559 | 0.1706794 | 0.1650679 | LOC100133286 | 1.033995166 |
| 7560 | 0.3782205 | 0.3657856 | FLJ31662     | 1.033995166 |
| 7561 | 0.0695825 | 0.0672948 | VSX2         | 1.033995166 |
| 7562 | 0.0963029 | 0.0931367 | GSDMA        | 1.033995166 |
| 7563 | 0.2814308 | 0.2721781 | PAPL         | 1.033995166 |
| 7564 | 0.2695983 | 0.2607346 | CCDC153      | 1.033995166 |
| 7565 | 0.2307857 | 0.2231981 | CAHM         | 1.033995166 |
| 7566 | 0.1089386 | 0.105357  | CACTIN-AS1   | 1.033995166 |



|      |           |           |           |             |
|------|-----------|-----------|-----------|-------------|
| 7567 | 0.1959256 | 0.189484  | XKR9      | 1.033995166 |
| 7568 | 0.2717073 | 0.2627742 | ZNF717    | 1.033995165 |
| 7569 | 0.108768  | 0.105192  | HPD       | 1.033995165 |
| 7570 | 0.0578566 | 0.0559544 | CLDN19    | 1.033995165 |
| 7571 | 0.1620525 | 0.1567246 | RTDR1     | 1.033995165 |
| 7572 | 0.1536869 | 0.1486341 | MMD2      | 1.033995165 |
| 7573 | 0.0241036 | 0.0233111 | CACNA1A   | 1.033995165 |
| 7574 | 0.2710007 | 0.2620908 | LECT1     | 1.033995165 |
| 7575 | 0.1574014 | 0.1522265 | LINC00598 | 1.033995165 |
| 7576 | 0.134625  | 0.1301989 | CD72      | 1.033995165 |
| 7577 | 0.1008222 | 0.0975074 | FOXD4L1   | 1.033995165 |
| 7578 | 0.0685525 | 0.0662986 | RS1       | 1.033995165 |
| 7579 | 0.0454326 | 0.0439389 | STEAP4    | 1.033995165 |
| 7580 | 0.0857611 | 0.0829415 | HRC       | 1.033995165 |
| 7581 | 0.0710534 | 0.0687173 | LINC00472 | 1.033995165 |
| 7582 | 0.1932309 | 0.1868779 | SPATA18   | 1.033995165 |
| 7583 | 0.1999995 | 0.193424  | KLRC3     | 1.033995165 |
| 7584 | 0.1141915 | 0.1104372 | LOC643770 | 1.033995165 |
| 7585 | 0.1086546 | 0.1050823 | HTR3B     | 1.033995164 |
| 7586 | 0.0799384 | 0.0773103 | SKOR1     | 1.033995164 |
| 7587 | 0.0918565 | 0.0888365 | PKD1L1    | 1.033995164 |
| 7588 | 0.1663868 | 0.1609164 | PBOV1     | 1.033995164 |
| 7589 | 0.1220852 | 0.1180714 | PDE6B     | 1.033995164 |
| 7590 | 0.1279309 | 0.1237249 | IL10      | 1.033995164 |
| 7591 | 0.0900603 | 0.0870993 | EREG      | 1.033995164 |
| 7592 | 0.1378304 | 0.1332988 | MS4A7     | 1.033995164 |
| 7593 | 0.1046445 | 0.101204  | CCDC85A   | 1.033995164 |
| 7594 | 0.0915639 | 0.0885535 | TPRXL     | 1.033995164 |
| 7595 | 0.0965707 | 0.0933957 | ACSM3     | 1.033995164 |
| 7596 | 0.0501201 | 0.0484723 | MAP7D2    | 1.033995164 |
| 7597 | 0.1952677 | 0.1888478 | TTC21A    | 1.033995164 |
| 7598 | 0.0463935 | 0.0448682 | C1orf140  | 1.033995164 |
| 7599 | 0.1621786 | 0.1568466 | C19orf35  | 1.033995164 |
| 7600 | 0.0386498 | 0.0373791 | GPR133    | 1.033995164 |
| 7601 | 0.0833265 | 0.0805869 | C1orf204  | 1.033995164 |
| 7602 | 0.0398927 | 0.0385811 | POM121L9P | 1.033995164 |
| 7603 | 0.1458359 | 0.1410412 | CBX3P2    | 1.033995163 |
| 7604 | 0.0874342 | 0.0845596 | PCDH11X   | 1.033995163 |
| 7605 | 0.1677935 | 0.1622769 | CMAHP     | 1.033995163 |
| 7606 | 0.0779938 | 0.0754296 | SLAMF7    | 1.033995163 |
| 7607 | 0.0749638 | 0.0724992 | CDRT1     | 1.033995163 |
| 7608 | 0.078023  | 0.0754578 | ANKRD45   | 1.033995163 |
| 7609 | 0.078023  | 0.0754578 | LOC440600 | 1.033995163 |

|      |           |           |              |             |
|------|-----------|-----------|--------------|-------------|
| 7610 | 0.0302203 | 0.0292268 | KIAA0319     | 1.033995163 |
| 7611 | 0.0993798 | 0.0961125 | LOC644669    | 1.033995162 |
| 7612 | 0.0697221 | 0.0674299 | SPAG6        | 1.033995162 |
| 7613 | 0.0881741 | 0.0852752 | CD36         | 1.033995162 |
| 7614 | 0.1165545 | 0.1127225 | HLA-DPA1     | 1.033995162 |
| 7615 | 0.078671  | 0.0760845 | LRRC10       | 1.033995162 |
| 7616 | 0.1208113 | 0.1168393 | FLJ35390     | 1.033995162 |
| 7617 | 0.0903336 | 0.0873636 | PRR23A       | 1.033995161 |
| 7618 | 0.0842018 | 0.0814335 | FAM92A1P2    | 1.03399516  |
| 7619 | 0.0944266 | 0.0913221 | WDR16        | 1.03399516  |
| 7620 | 0.0431648 | 0.0417456 | HNF4A        | 1.03399516  |
| 7621 | 0.0981627 | 0.0949354 | LOC100130899 | 1.03399516  |
| 7622 | 0.1021066 | 0.0987496 | LOC340515    | 1.03399516  |
| 7623 | 0.112103  | 0.1084173 | LOC145474    | 1.033995159 |
| 7624 | 0.0570021 | 0.055128  | MUC21        | 1.033995159 |
| 7625 | 0.0329746 | 0.0318905 | KLHL6        | 1.033995159 |
| 7626 | 0.0733629 | 0.0709509 | TRIM67       | 1.033995159 |
| 7627 | 0.0873243 | 0.0844533 | DCDC5        | 1.033995159 |
| 7628 | 0.0338201 | 0.0327082 | TNNI1        | 1.033995158 |
| 7629 | 0.0676622 | 0.0654376 | LOC399715    | 1.033995158 |
| 7630 | 0.0693278 | 0.0670485 | HNRNPA3P1    | 1.033995158 |
| 7631 | 0.0349605 | 0.0338111 | NDST3        | 1.033995158 |
| 7632 | 0.0414808 | 0.040117  | NPHS1        | 1.033995157 |
| 7633 | 0.0359309 | 0.0347496 | MYOM3        | 1.033995154 |
| 7634 | 0.0210952 | 0.0204016 | UNC5C        | 1.033995151 |
| 7635 | 0.0233344 | 0.0225672 | DCHS2        | 1.033995147 |
| 7636 | 0.0337872 | 0.0326764 | CACNA1S      | 1.033995147 |
| 7637 | 0.0333333 | 0.0322373 | AMER3        | 1.033995144 |
| 7638 | 0.0110364 | 0.0106735 | USH2A        | 1.033995103 |
| 7639 | 47.924293 | 46.440442 | TERF2IP      | 1.0319517   |
| 7640 | 18.908386 | 18.342992 | NSMAF        | 1.030823404 |
| 7641 | 12.148288 | 11.789257 | SPECC1       | 1.030454089 |
| 7642 | 10.924488 | 10.603737 | GOSR1        | 1.030248809 |
| 7643 | 21.643031 | 21.00913  | MBD2         | 1.030172635 |
| 7644 | 23.041485 | 22.374157 | C16orf45     | 1.029825833 |
| 7645 | 13.511616 | 13.122758 | WFS1         | 1.02963232  |
| 7646 | 22.196396 | 21.558372 | MICA         | 1.029595189 |
| 7647 | 11.767549 | 11.433107 | PAGR1        | 1.029252072 |
| 7648 | 98.866968 | 96.091499 | PDIA4        | 1.02888361  |
| 7649 | 102.41812 | 99.543172 | MORF4L2      | 1.028881444 |
| 7650 | 10.904303 | 10.599329 | CTDPI        | 1.028772971 |
| 7651 | 43.18459  | 41.983071 | SMARCD2      | 1.028619111 |
| 7652 | 22.39169  | 21.772144 | EPAS1        | 1.028455909 |

|      |           |           |          |             |
|------|-----------|-----------|----------|-------------|
| 7653 | 16.820817 | 16.363766 | SNX9     | 1.02793068  |
| 7654 | 57.367115 | 55.81325  | XBP1     | 1.027840435 |
| 7655 | 19.285848 | 18.764956 | ARHGAP35 | 1.027758768 |
| 7656 | 62.225795 | 60.546918 | VMP1     | 1.027728531 |
| 7657 | 14.993824 | 14.595333 | PEX26    | 1.027302643 |
| 7658 | 4.1111513 | 4.0026714 | AIM1     | 1.027101867 |
| 7659 | 8.2612889 | 8.0444023 | AP3M2    | 1.026961188 |
| 7660 | 56.744924 | 55.267819 | HMGA2    | 1.02672631  |
| 7661 | 30.462618 | 29.673799 | MSANTD3  | 1.026583017 |
| 7662 | 40.730542 | 39.6876   | E2F1     | 1.026278787 |
| 7663 | 7.0958447 | 6.91534   | SCYL2    | 1.026102076 |
| 7664 | 6.9984907 | 6.8221153 | MAP2K4   | 1.025853474 |
| 7665 | 42.730433 | 41.655762 | KIF1C    | 1.025798865 |
| 7666 | 7.7438239 | 7.5507396 | VPS53    | 1.025571583 |
| 7667 | 17.896621 | 17.451269 | RUSC2    | 1.025519798 |
| 7668 | 120.38833 | 117.42257 | BCAP31   | 1.025257181 |
| 7669 | 70.886253 | 69.144152 | EMD      | 1.02519521  |
| 7670 | 64.533598 | 62.955395 | VAMP3    | 1.025068592 |
| 7671 | 0.1349738 | 0.1316876 | SPOCK3   | 1.02495441  |
| 7672 | 53.172386 | 51.891704 | ALKBH5   | 1.024679897 |
| 7673 | 12.079494 | 11.791532 | FAM219A  | 1.024421139 |
| 7674 | 45.160299 | 44.086026 | AKT1S1   | 1.024367653 |
| 7675 | 106.69129 | 104.21624 | PRPF19   | 1.023749138 |
| 7676 | 18.77388  | 18.339121 | PLEKHG3  | 1.02370666  |
| 7677 | 65.528827 | 64.021081 | MRPL24   | 1.023550773 |
| 7678 | 6.4580268 | 6.3117952 | IFNAR1   | 1.023167994 |
| 7679 | 59.211668 | 57.883182 | BAG3     | 1.022951161 |
| 7680 | 108.32064 | 105.89802 | ID1      | 1.022876941 |
| 7681 | 6.0199791 | 5.8874736 | KCTD11   | 1.022506333 |
| 7682 | 69.085862 | 67.587552 | LSM4     | 1.022168426 |
| 7683 | 31.82535  | 31.153985 | GBF1     | 1.021549891 |
| 7684 | 3.4031353 | 3.3323894 | GOLGA1   | 1.021229796 |
| 7685 | 28.798695 | 28.2078   | DIABLO   | 1.020947911 |
| 7686 | 5.01393   | 4.9112523 | ELF2     | 1.020906622 |
| 7687 | 12.114143 | 11.866064 | HIP1     | 1.020906622 |
| 7688 | 11.900092 | 11.662884 | ABHD2    | 1.020338629 |
| 7689 | 64.152355 | 62.906611 | MPDU1    | 1.019803078 |
| 7690 | 7.9153163 | 7.7628985 | SH3RF3   | 1.019634124 |
| 7691 | 4.1907397 | 4.1108581 | PPP1R3D  | 1.019431856 |
| 7692 | 4.4394294 | 4.3548074 | CD3EAP   | 1.019431856 |
| 7693 | 73.656918 | 72.262695 | RRP36    | 1.019293815 |
| 7694 | 16.965595 | 16.64446  | NR2F2    | 1.019293815 |
| 7695 | 7.5325121 | 7.3904397 | MYPOP    | 1.019223809 |

|      |           |           |          |             |
|------|-----------|-----------|----------|-------------|
| 7696 | 9.2058678 | 9.0322339 | ASPHD1   | 1.019223809 |
| 7697 | 3.0549321 | 2.9973124 | ARMC5    | 1.019223809 |
| 7698 | 16.974276 | 16.655857 | PPA2     | 1.01911754  |
| 7699 | 38.467251 | 37.747636 | TACO1    | 1.01906383  |
| 7700 | 48.47709  | 47.574593 | PRC1     | 1.01897014  |
| 7701 | 12.58226  | 12.348862 | MFSD2A   | 1.018900349 |
| 7702 | 64.254143 | 63.076502 | FOXMI    | 1.018670044 |
| 7703 | 12.319068 | 12.094222 | CCDC50   | 1.018591144 |
| 7704 | 154.04891 | 151.2415  | NEDD8    | 1.018562405 |
| 7705 | 24.030669 | 23.593265 | CDC42EP3 | 1.018539336 |
| 7706 | 16.110837 | 15.818129 | CD46     | 1.018504604 |
| 7707 | 17.081926 | 16.774474 | MYC      | 1.018328575 |
| 7708 | 7.1668823 | 7.039554  | LIG3     | 1.01808755  |
| 7709 | 13.335875 | 13.102145 | MFSD10   | 1.017838994 |
| 7710 | 31.806361 | 31.270896 | SETD8    | 1.017123453 |
| 7711 | 21.068338 | 20.718112 | MAVS     | 1.016904339 |
| 7712 | 9.2378441 | 9.0855528 | ALKBH7   | 1.016761916 |
| 7713 | 9.2457631 | 9.0950733 | OPA3     | 1.016568284 |
| 7714 | 4.1751886 | 4.1075382 | C12orf29 | 1.016469827 |
| 7715 | 15.981275 | 15.722331 | FBXO5    | 1.016469826 |
| 7716 | 18.930444 | 18.62646  | APIP     | 1.016320037 |
| 7717 | 65.401212 | 64.3546   | MGAT4B   | 1.016263204 |
| 7718 | 2.2738843 | 2.2377058 | SESTD1   | 1.016167666 |
| 7719 | 2.5829031 | 2.541808  | C17orf75 | 1.016167665 |
| 7720 | 5.9330819 | 5.8404816 | PAWR     | 1.015854902 |
| 7721 | 5.1366074 | 5.0564381 | ADRA1B   | 1.015854902 |
| 7722 | 27.969702 | 27.538006 | FBXO18   | 1.015676357 |
| 7723 | 3.6329548 | 3.5773944 | PGBD1    | 1.015530969 |
| 7724 | 2.5420314 | 2.5039827 | RECK     | 1.015195256 |
| 7725 | 113.59723 | 111.92022 | PSMD13   | 1.014984021 |
| 7726 | 3.2524068 | 3.2048244 | KCTD21   | 1.01484711  |
| 7727 | 5.4924567 | 5.4130571 | SKAP2    | 1.014668156 |
| 7728 | 3.5287444 | 3.4783575 | SCRN3    | 1.014485826 |
| 7729 | 119.23662 | 117.53404 | SHMT2    | 1.014485826 |
| 7730 | 1.904195  | 1.8770051 | ATXN7L1  | 1.014485825 |
| 7731 | 1409.785  | 1389.6672 | EEF1G    | 1.01447671  |
| 7732 | 9.2317322 | 9.1050124 | PANK2    | 1.013917592 |
| 7733 | 7.4798683 | 7.3771955 | BBS2     | 1.013917592 |
| 7734 | 6.0264021 | 5.9464097 | UNKL     | 1.013452218 |
| 7735 | 83.384075 | 82.285988 | SMARCB1  | 1.013344766 |
| 7736 | 295.60213 | 291.76931 | HDGF     | 1.013136476 |
| 7737 | 5.1277664 | 5.061782  | MAST3    | 1.013035807 |
| 7738 | 48.194462 | 47.574292 | CKS2     | 1.013035807 |

|      |           |           |           |             |
|------|-----------|-----------|-----------|-------------|
| 7739 | 14.968777 | 14.776675 | GNPAT     | 1.013000343 |
| 7740 | 9.4592681 | 9.3388601 | CDC25C    | 1.012893226 |
| 7741 | 1.5209329 | 1.5015728 | ZBTB34    | 1.012893226 |
| 7742 | 8.2262961 | 8.1269293 | TOM1L1    | 1.012226849 |
| 7743 | 40.717695 | 40.230131 | ABCF2     | 1.012119389 |
| 7744 | 2.7891699 | 2.7561096 | RABGAP1L  | 1.011995271 |
| 7745 | 53.719713 | 53.092876 | ERI3      | 1.011806431 |
| 7746 | 13.078984 | 12.927592 | PRKD2     | 1.01171079  |
| 7747 | 20.218421 | 19.988216 | PPME1     | 1.011517013 |
| 7748 | 41.695371 | 41.222295 | LRRC47    | 1.011476218 |
| 7749 | 12.025113 | 11.88935  | STAM      | 1.011418855 |
| 7750 | 16.547542 | 16.364482 | TBCC      | 1.011186451 |
| 7751 | 19.743633 | 19.526297 | DCAF8     | 1.01113041  |
| 7752 | 37.494471 | 37.105043 | TWIST2    | 1.010495278 |
| 7753 | 3.6345422 | 3.5980802 | WDR7      | 1.010133741 |
| 7754 | 59.2026   | 58.637683 | SCAMP2    | 1.009634026 |
| 7755 | 136.90559 | 135.61299 | DDX5      | 1.00953156  |
| 7756 | 17.892511 | 17.735062 | SPATA20   | 1.008877877 |
| 7757 | 57.397296 | 56.902946 | EMC4      | 1.008687594 |
| 7758 | 267.77144 | 265.51906 | COX5B     | 1.008482951 |
| 7759 | 26.220028 | 26.01597  | ADIPOR2   | 1.007843539 |
| 7760 | 9.8416201 | 9.7652744 | FAM120B   | 1.007818076 |
| 7761 | 2.7904091 | 2.769685  | ZSCAN26   | 1.007482472 |
| 7762 | 4.4130293 | 4.3802541 | BICD1     | 1.007482472 |
| 7763 | 11.090127 | 11.01229  | IFRD1     | 1.007068211 |
| 7764 | 57.927997 | 57.526538 | SUCLG1    | 1.006978668 |
| 7765 | 7.450129  | 7.4025899 | TRAIP     | 1.006421964 |
| 7766 | 26.846393 | 26.677661 | PPFIA1    | 1.006324875 |
| 7767 | 9.6761009 | 9.6168912 | RHOBTB2   | 1.006156837 |
| 7768 | 4.1889347 | 4.1637467 | LOC389906 | 1.006049353 |
| 7769 | 79.496423 | 79.038371 | VPS25     | 1.0057953   |
| 7770 | 14.708609 | 14.624606 | COG8      | 1.005743935 |
| 7771 | 24.356156 | 24.218918 | PLEKHJ1   | 1.005666534 |
| 7772 | 7.3880759 | 7.3473964 | FBXO46    | 1.005536586 |
| 7773 | 56.497051 | 56.185973 | IK        | 1.005536586 |
| 7774 | 4.4313381 | 4.4080939 | NME7      | 1.005273081 |
| 7775 | 263.19157 | 261.87465 | YWHAZ     | 1.005028821 |
| 7776 | 40.618149 | 40.41703  | EXT1      | 1.004976102 |
| 7777 | 38.232358 | 38.044026 | C19orf70  | 1.00495036  |
| 7778 | 2.676762  | 2.6637932 | PAN2      | 1.004868544 |
| 7779 | 14.563267 | 14.49629  | GFER      | 1.004620306 |
| 7780 | 16.54425  | 16.468162 | PRR14     | 1.004620306 |
| 7781 | 7.4467504 | 7.4137411 | FZD6      | 1.004452449 |

|      |           |           |           |             |
|------|-----------|-----------|-----------|-------------|
| 7782 | 1.5033125 | 1.497287  | FGD6      | 1.004024294 |
| 7783 | 111.02433 | 110.59375 | ID3       | 1.003893417 |
| 7784 | 11.755683 | 11.721172 | PPP1R12A  | 1.002944263 |
| 7785 | 13.571084 | 13.53314  | SSR1      | 1.00280376  |
| 7786 | 2.6947304 | 2.6875761 | SETBP1    | 1.002661982 |
| 7787 | 7.051318  | 7.0325974 | VGLL4     | 1.002661981 |
| 7788 | 0.5859576 | 0.584402  | PTPN4     | 1.002661981 |
| 7789 | 44.597701 | 44.487143 | DDX42     | 1.002485158 |
| 7790 | 10.04527  | 10.02342  | C1orf35   | 1.002179933 |
| 7791 | 8.7843323 | 8.7673823 | CLIP1     | 1.001933303 |
| 7792 | 38.219392 | 38.152784 | FAM168B   | 1.001745807 |
| 7793 | 5.5741022 | 5.5647378 | THAP9-AS1 | 1.001682819 |
| 7794 | 5.3369554 | 5.3279894 | ZNF385A   | 1.001682819 |
| 7795 | 5.3791711 | 5.3701341 | NEIL3     | 1.001682819 |
| 7796 | 3.71565   | 3.7106677 | CYP1B1    | 1.001342689 |
| 7797 | 3.0383292 | 3.0347788 | FTSJD1    | 1.001169925 |
| 7798 | 18.000443 | 17.980749 | PPP2R2D   | 1.001095323 |
| 7799 | 30.609249 | 30.57784  | RNF7      | 1.001027207 |
| 7800 | 39.706072 | 39.676958 | RNF145    | 1.000733785 |
| 7801 | 14.234939 | 14.225827 | PPIE      | 1.000640486 |
| 7802 | 4.0942927 | 4.0916721 | PSTPIP2   | 1.000640486 |
| 7803 | 1.3786075 | 1.3777251 | FIGN      | 1.000640486 |
| 7804 | 2.998554  | 2.9966347 | SCNM1     | 1.000640485 |
| 7805 | 2.3805558 | 2.3803328 | PRDM1     | 1.000093688 |
| 7806 | 1.2846694 | 1.284549  | SHROOM4   | 1.000093687 |
| 7807 | 29.448846 | 29.451021 | IST1      | 0.999926135 |
| 7808 | 8.7507412 | 8.7528688 | TBC1D22B  | 0.999756918 |
| 7809 | 11.376371 | 11.379876 | SRPK2     | 0.999692012 |
| 7810 | 89.610632 | 89.675965 | YWHAH     | 0.99927145  |
| 7811 | 11.480481 | 11.490066 | SNX1      | 0.999165858 |
| 7812 | 7.4638841 | 7.4717706 | FAM222A   | 0.998944485 |
| 7813 | 120.10811 | 120.26201 | SF3B5     | 0.99872028  |
| 7814 | 288.19401 | 288.57054 | TMA7      | 0.998695191 |
| 7815 | 9.3801094 | 9.3924321 | TAOK3     | 0.998688016 |
| 7816 | 282.94074 | 283.36155 | SF3B2     | 0.998514942 |
| 7817 | 6.8009161 | 6.8122233 | MSRA      | 0.998340163 |
| 7818 | 2.4404793 | 2.4445368 | FAM46B    | 0.998340162 |
| 7819 | 7.0600647 | 7.0747408 | CCDC102A  | 0.99792557  |
| 7820 | 25.700881 | 25.756114 | PIK3R2    | 0.997855532 |
| 7821 | 0.7926127 | 0.7944283 | UBN2      | 0.997714637 |
| 7822 | 6.7423368 | 6.7577808 | C15orf40  | 0.997714636 |
| 7823 | 183.41728 | 183.87133 | CCT3      | 0.997530604 |
| 7824 | 6.4388693 | 6.4549989 | RPAIN     | 0.997501221 |

|      |           |           |          |             |
|------|-----------|-----------|----------|-------------|
| 7825 | 3.0025542 | 3.0113873 | PECR     | 0.99706677  |
| 7826 | 5.2390936 | 5.2545063 | HMX3     | 0.99706677  |
| 7827 | 3.0851429 | 3.094219  | CYP20A1  | 0.99706677  |
| 7828 | 26.171856 | 26.254673 | HEBP2    | 0.996845642 |
| 7829 | 8.535314  | 8.5623227 | PDE8A    | 0.996845641 |
| 7830 | 36.322353 | 36.445471 | DDX49    | 0.996621849 |
| 7831 | 34.108906 | 34.226905 | SLC52A2  | 0.996552446 |
| 7832 | 41.900429 | 42.046263 | RWDD1    | 0.996531575 |
| 7833 | 4.9730633 | 4.9910543 | NDUFAF7  | 0.996395344 |
| 7834 | 131.72307 | 132.21069 | PRDX6    | 0.996311789 |
| 7835 | 5.282015  | 5.3018539 | KLF9     | 0.996258118 |
| 7836 | 8.9281782 | 8.9625398 | BPHL     | 0.996166077 |
| 7837 | 78.569616 | 78.892563 | SGTA     | 0.995906506 |
| 7838 | 10.229863 | 10.272928 | GAPVD1   | 0.995807847 |
| 7839 | 3.3052381 | 3.3195152 | TRO      | 0.995699051 |
| 7840 | 1.5147853 | 1.5213285 | JRKL     | 0.995699051 |
| 7841 | 4.7950327 | 4.815745  | GPATCH1  | 0.995699051 |
| 7842 | 4.2310408 | 4.2524028 | CABLES1  | 0.994976483 |
| 7843 | 53.717416 | 53.988629 | WDR74    | 0.994976483 |
| 7844 | 30.826029 | 30.981666 | NPC1     | 0.994976483 |
| 7845 | 8.0113111 | 8.0537582 | EVA1C    | 0.994729529 |
| 7846 | 22.953885 | 23.076658 | CHAF1B   | 0.994679763 |
| 7847 | 5.4630793 | 5.4924176 | INPP4A   | 0.994658396 |
| 7848 | 94.898303 | 95.422088 | ATXN2L   | 0.994510866 |
| 7849 | 0.7527796 | 0.7571513 | TMEM56   | 0.994226125 |
| 7850 | 34.554948 | 34.7639   | AKIRIN2  | 0.993989403 |
| 7851 | 78.714542 | 79.20752  | 2-Sep    | 0.99377612  |
| 7852 | 8.2183836 | 8.2712807 | ALDH16A1 | 0.993604732 |
| 7853 | 4.9699979 | 5.0041282 | BET1     | 0.99317957  |
| 7854 | 30.838675 | 31.054664 | TMEM205  | 0.993044865 |
| 7855 | 58.07739  | 58.494029 | SMAP2    | 0.992877232 |
| 7856 | 4.0449559 | 4.0749666 | STK36    | 0.992635362 |
| 7857 | 2.378311  | 2.3959563 | OASL     | 0.992635362 |
| 7858 | 1.071922  | 1.0798749 | ERCC6L2  | 0.992635362 |
| 7859 | 3.0478903 | 3.0705035 | SMN1     | 0.992635362 |
| 7860 | 71.91893  | 72.477797 | PPP6R1   | 0.992289123 |
| 7861 | 10.44941  | 10.532868 | FBXO21   | 0.992076446 |
| 7862 | 28.864764 | 29.103668 | CDC45    | 0.991791284 |
| 7863 | 3.8156512 | 3.847232  | ANKMY2   | 0.991791284 |
| 7864 | 26.850188 | 27.07635  | H2AFY2   | 0.991647243 |
| 7865 | 20.446331 | 20.620058 | PRKRA    | 0.991574853 |
| 7866 | 5.6850994 | 5.7338242 | FAM131A  | 0.991502216 |
| 7867 | 14.70433  | 14.83474  | TSEN54   | 0.991209162 |

|      |           |           |           |             |
|------|-----------|-----------|-----------|-------------|
| 7868 | 1.7192211 | 1.7349886 | ZNF211    | 0.990912037 |
| 7869 | 2.2387616 | 2.2592939 | ZNF75A    | 0.990912036 |
| 7870 | 8.1883947 | 8.263493  | ITSN1     | 0.990912036 |
| 7871 | 11.199039 | 11.301748 | GALNT1    | 0.990912036 |
| 7872 | 90.26276  | 91.097937 | SHISA5    | 0.990832105 |
| 7873 | 51.00905  | 51.492159 | KIAA1967  | 0.99061781  |
| 7874 | 17.50958  | 17.677628 | SCARF2    | 0.990493754 |
| 7875 | 20.378341 | 20.57944  | PPID      | 0.990228177 |
| 7876 | 8.6102901 | 8.6956658 | RAB40C    | 0.990181814 |
| 7877 | 15.682237 | 15.840717 | TRIAP1    | 0.989995375 |
| 7878 | 29.676865 | 29.980562 | INPPL1    | 0.989870197 |
| 7879 | 6.8446808 | 6.9154949 | ARHGEF9   | 0.989760081 |
| 7880 | 8.0103558 | 8.0934057 | DOCK6     | 0.989738566 |
| 7881 | 13.14183  | 13.278082 | TSC22D2   | 0.989738566 |
| 7882 | 7.0626032 | 7.1362414 | ZNF526    | 0.98968109  |
| 7883 | 24.691884 | 24.95468  | TMEM11    | 0.989469061 |
| 7884 | 3.8063836 | 3.8485683 | NDUFAF5   | 0.989038857 |
| 7885 | 5.5890125 | 5.6537775 | ATG5      | 0.988544831 |
| 7886 | 5.2644473 | 5.3254512 | E2F6      | 0.988544831 |
| 7887 | 4.1148139 | 4.1631998 | LOC493754 | 0.988377734 |
| 7888 | 97.34854  | 98.49934  | COPZ1     | 0.988316667 |
| 7889 | 20.311613 | 20.552203 | C12orf52  | 0.988293725 |
| 7890 | 12.993492 | 13.150778 | FUT11     | 0.988039828 |
| 7891 | 19.181546 | 19.420478 | RNF34     | 0.987696878 |
| 7892 | 25.956993 | 26.280323 | LIG1      | 0.987696877 |
| 7893 | 7.7865164 | 7.8857282 | ZNF3      | 0.98741881  |
| 7894 | 11.270585 | 11.414189 | AP5S1     | 0.987418809 |
| 7895 | 12.203338 | 12.359305 | EARS2     | 0.987380632 |
| 7896 | 7.996725  | 8.1020895 | SLC35E2B  | 0.986995388 |
| 7897 | 1.3391645 | 1.3568093 | ZMYM5     | 0.986995388 |
| 7898 | 0.3174057 | 0.3215878 | DNAH14    | 0.986995387 |
| 7899 | 19.845607 | 20.110892 | ATP2C1    | 0.986808881 |
| 7900 | 7.1756042 | 7.273684  | KIF3C     | 0.986515799 |
| 7901 | 4.1422793 | 4.1994891 | FECH      | 0.98637697  |
| 7902 | 6.3174522 | 6.4053832 | SYNRG     | 0.986272315 |
| 7903 | 4.0953309 | 4.1523328 | FDX1      | 0.986272315 |
| 7904 | 0.6991555 | 0.7091529 | SCAI      | 0.98590237  |
| 7905 | 3.3612823 | 3.409346  | SLC35E4   | 0.98590237  |
| 7906 | 44.347991 | 44.982132 | PSMD14    | 0.98590237  |
| 7907 | 31.918399 | 32.375993 | INCENP    | 0.985866264 |
| 7908 | 27.965974 | 28.387021 | RHOT2     | 0.985167619 |
| 7909 | 14.069165 | 14.286936 | HAUS1     | 0.984757303 |
| 7910 | 5.190523  | 5.2708652 | CIDECP    | 0.984757303 |



|      |           |           |            |             |
|------|-----------|-----------|------------|-------------|
| 7911 | 23.587946 | 23.953055 | NRM        | 0.984757303 |
| 7912 | 0.7412396 | 0.7527129 | LAMC2      | 0.984757303 |
| 7913 | 12.718289 | 12.917278 | ERC1       | 0.98459507  |
| 7914 | 28.813496 | 29.268253 | EXOSC1     | 0.984462466 |
| 7915 | 5.5943473 | 5.6828864 | FKBP14     | 0.984420058 |
| 7916 | 6.5147719 | 6.6191513 | SIK2       | 0.984230695 |
| 7917 | 18.925542 | 19.233278 | SUGP2      | 0.983999798 |
| 7918 | 7.0727889 | 7.1888013 | PIGK       | 0.983862069 |
| 7919 | 33.257679 | 33.805736 | SAMD4B     | 0.983788054 |
| 7920 | 115.58458 | 117.49362 | HNRNPUL1   | 0.983752038 |
| 7921 | 5.2301033 | 5.3175429 | MTHFSD     | 0.98355638  |
| 7922 | 2.0691396 | 2.1037326 | HEATR5A    | 0.983556379 |
| 7923 | 59.502428 | 60.546173 | TAF15      | 0.982761174 |
| 7924 | 12.071496 | 12.283725 | CAND1      | 0.98272268  |
| 7925 | 84.211376 | 85.713122 | PPP2CA     | 0.982479395 |
| 7926 | 63.309702 | 64.448303 | CLTC       | 0.98233312  |
| 7927 | 11.567603 | 11.776094 | DBF4B      | 0.98229541  |
| 7928 | 7.5213834 | 7.6569465 | DDX51      | 0.98229541  |
| 7929 | 0.6097306 | 0.6207202 | CXorf23    | 0.982295409 |
| 7930 | 15.636371 | 15.927982 | DSCR3      | 0.981691911 |
| 7931 | 4.6379711 | 4.7247121 | C2CD2L     | 0.981640983 |
| 7932 | 144.96684 | 147.68205 | EWSR1      | 0.981614461 |
| 7933 | 136.32351 | 138.89049 | GADD45GIP1 | 0.98151797  |
| 7934 | 15.591533 | 15.885963 | SNX8       | 0.981466003 |
| 7935 | 16.569388 | 16.88309  | UCKL1      | 0.981419143 |
| 7936 | 41.203359 | 41.984451 | FTSJ3      | 0.981395682 |
| 7937 | 10.626355 | 10.829056 | WDR62      | 0.981281689 |
| 7938 | 188.61357 | 192.24839 | EIF3G      | 0.981093091 |
| 7939 | 22.153518 | 22.58208  | SEC16A     | 0.981022017 |
| 7940 | 1.468161  | 1.4966424 | ATP8B3     | 0.980969776 |
| 7941 | 10.78431  | 10.993519 | MRPS24     | 0.980969775 |
| 7942 | 341.79417 | 348.462   | RPL39      | 0.980864982 |
| 7943 | 10.646945 | 10.855646 | ASF1A      | 0.980774829 |
| 7944 | 11.501134 | 11.726969 | PTBP3      | 0.980742198 |
| 7945 | 4.3269587 | 4.4121285 | CTNS       | 0.980696448 |
| 7946 | 4.7917945 | 4.8870297 | ZNF747     | 0.98051266  |
| 7947 | 106.9509  | 109.0886  | SNRPG      | 0.980403956 |
| 7948 | 10.267653 | 10.475687 | WDR85      | 0.980141253 |
| 7949 | 29.94222  | 30.553266 | JAK1       | 0.980000643 |
| 7950 | 15.954555 | 16.28132  | OIP5-AS1   | 0.979930062 |
| 7951 | 19.433134 | 19.831939 | NDNL2      | 0.97989077  |
| 7952 | 2.2401857 | 2.286897  | CENPC1     | 0.97957437  |
| 7953 | 8.6273942 | 8.8072886 | ZNF703     | 0.97957437  |

|      |           |           |              |             |
|------|-----------|-----------|--------------|-------------|
| 7954 | 15.450625 | 15.772794 | CREBBP       | 0.97957437  |
| 7955 | 12.595159 | 12.863201 | SPAG9        | 0.979162091 |
| 7956 | 5.1167385 | 5.2259997 | RAP2A        | 0.97909277  |
| 7957 | 16.7594   | 17.129941 | NCDN         | 0.978368846 |
| 7958 | 5.7667353 | 5.8945377 | C16orf52     | 0.978318505 |
| 7959 | 0.888968  | 0.908869  | LRRC27       | 0.978103538 |
| 7960 | 8.0359704 | 8.2158689 | RNF121       | 0.978103538 |
| 7961 | 43.749115 | 44.740763 | STX10        | 0.977835687 |
| 7962 | 44.86245  | 45.890609 | AZIN1        | 0.977595432 |
| 7963 | 44.190491 | 45.205149 | DCTD         | 0.977554384 |
| 7964 | 32.273284 | 33.023167 | SEC22B       | 0.977292208 |
| 7965 | 59.846504 | 61.257618 | MYOF         | 0.97696426  |
| 7966 | 244.92709 | 250.75725 | HNRNPC       | 0.976749761 |
| 7967 | 3.3406803 | 3.420897  | ZC3H10       | 0.976550992 |
| 7968 | 4.3389976 | 4.4431859 | CYP2R1       | 0.976550992 |
| 7969 | 33.616614 | 34.443879 | SAMM50       | 0.975982238 |
| 7970 | 5.835186  | 5.9792528 | DNAJC24      | 0.975905552 |
| 7971 | 78.790455 | 80.738098 | FLNC         | 0.975877023 |
| 7972 | 101.93736 | 104.4709  | FAM129B      | 0.975748931 |
| 7973 | 6.4718926 | 6.6337782 | THSD4        | 0.97559677  |
| 7974 | 5.9257138 | 6.0761256 | SIRT3        | 0.975245443 |
| 7975 | 14.289703 | 14.654652 | YARS2        | 0.975096709 |
| 7976 | 20.036296 | 20.548724 | BCL2L12      | 0.975062801 |
| 7977 | 0.6400953 | 0.6565688 | PRDM11       | 0.97490973  |
| 7978 | 7.7972602 | 7.9979304 | ANAPC15      | 0.97490973  |
| 7979 | 9.3144698 | 9.5541869 | WASL         | 0.97490973  |
| 7980 | 71.146511 | 73.001582 | ARF3         | 0.974588614 |
| 7981 | 38.926558 | 39.942284 | PET100       | 0.974570159 |
| 7982 | 30.86782  | 31.681794 | GLYR1        | 0.974307841 |
| 7983 | 14.546005 | 14.933478 | ABI1         | 0.97405342  |
| 7984 | 39.412341 | 40.466213 | MAGOH        | 0.973956739 |
| 7985 | 23.013005 | 23.6345   | EIF1AD       | 0.973703905 |
| 7986 | 15.524225 | 15.943476 | ZMYND11      | 0.973703905 |
| 7987 | 21.471464 | 22.054899 | NPRL3        | 0.97354622  |
| 7988 | 44.036118 | 45.243178 | SLC25A11     | 0.973320635 |
| 7989 | 1.1253432 | 1.1563663 | ZNF564       | 0.973171924 |
| 7990 | 3.5776738 | 3.6763019 | ITPKA        | 0.973171923 |
| 7991 | 2.3732327 | 2.4386572 | RP9P         | 0.973171923 |
| 7992 | 9.4014812 | 9.6606581 | RAD9A        | 0.973171923 |
| 7993 | 4.5489659 | 4.6743703 | LOC100288911 | 0.973171923 |
| 7994 | 0.8508273 | 0.8742826 | ZNF430       | 0.973171923 |
| 7995 | 1.9229481 | 1.9759593 | SLMO1        | 0.973171923 |
| 7996 | 1611.1965 | 1655.9531 | VIM          | 0.972972311 |

|      |           |           |            |             |
|------|-----------|-----------|------------|-------------|
| 7997 | 27.493947 | 28.265857 | NR2F6      | 0.972691107 |
| 7998 | 37.294971 | 38.345427 | FAF2       | 0.972605467 |
| 7999 | 3.5943995 | 3.6957757 | ZNF398     | 0.972569713 |
| 8000 | 11.316717 | 11.637352 | RUNX1      | 0.972447837 |
| 8001 | 7.4386224 | 7.6508248 | CROCCP2    | 0.972264114 |
| 8002 | 150.98331 | 155.42101 | NDUFB8     | 0.971447257 |
| 8003 | 27.467533 | 28.27506  | DRG2       | 0.97144403  |
| 8004 | 8.3252378 | 8.570978  | SMIM10     | 0.971328795 |
| 8005 | 10.713739 | 11.029982 | CIR1       | 0.971328794 |
| 8006 | 24.341062 | 25.072552 | ALDH9A1    | 0.970825045 |
| 8007 | 2.1470049 | 2.2118353 | SSBP2      | 0.970689342 |
| 8008 | 55.279445 | 56.948647 | C22orf28   | 0.970689342 |
| 8009 | 10.630146 | 10.952592 | DCAF5      | 0.970559882 |
| 8010 | 6.5871325 | 6.7906013 | MTMR11     | 0.970036704 |
| 8011 | 18.881572 | 19.468119 | MRP63      | 0.969871437 |
| 8012 | 0.6024268 | 0.6214619 | GOLGA80    | 0.969370471 |
| 8013 | 1.7026103 | 1.7564083 | ISL2       | 0.969370471 |
| 8014 | 2.0592836 | 2.1243515 | PMS2P3     | 0.969370471 |
| 8015 | 0.9591876 | 0.9894954 | ST6GALNAC3 | 0.96937047  |
| 8016 | 6.9159126 | 7.1344371 | ABCD3      | 0.96937047  |
| 8017 | 13.879592 | 14.31815  | EIF2B3     | 0.96937047  |
| 8018 | 17.130821 | 17.677041 | NAB2       | 0.969100074 |
| 8019 | 53.159677 | 54.855781 | ALAS1      | 0.969080674 |
| 8020 | 9.334     | 9.6347162 | LINC00839  | 0.968788266 |
| 8021 | 8.2786662 | 8.5453824 | DCK        | 0.968788266 |
| 8022 | 62.985502 | 65.02308  | GTF2F1     | 0.968663761 |
| 8023 | 7.5525617 | 7.799456  | ENKD1      | 0.968344682 |
| 8024 | 4.7461584 | 4.9030791 | C17orf59   | 0.967995477 |
| 8025 | 151.66945 | 156.68772 | EEF1D      | 0.96797282  |
| 8026 | 12.258794 | 12.666406 | COQ10B     | 0.967819478 |
| 8027 | 6.1867277 | 6.3931403 | RABL5      | 0.967713427 |
| 8028 | 19.820178 | 20.483533 | CASC4      | 0.967615232 |
| 8029 | 29.03253  | 30.010509 | IRF3       | 0.967412146 |
| 8030 | 2.1889118 | 2.2629421 | C5orf28    | 0.967285803 |
| 8031 | 56.636528 | 58.561565 | CDC42EP1   | 0.967127973 |
| 8032 | 6.1631439 | 6.3726785 | ZDHHC3     | 0.967119859 |
| 8033 | 3.3581969 | 3.4738997 | MCTS1      | 0.966693708 |
| 8034 | 6.6329967 | 6.862473  | POLB       | 0.966560701 |
| 8035 | 6.378063  | 6.5987196 | FAM104B    | 0.966560701 |
| 8036 | 13.145794 | 13.601675 | RNF123     | 0.966483456 |
| 8037 | 16.615794 | 17.201164 | ERGIC2     | 0.965969171 |
| 8038 | 33.619775 | 34.807126 | BOD1       | 0.965887702 |
| 8039 | 10.239121 | 10.602116 | PEX5       | 0.965761985 |

|      |           |           |          |             |
|------|-----------|-----------|----------|-------------|
| 8040 | 17.71538  | 18.35111  | UQCRB    | 0.965357373 |
| 8041 | 11.103454 | 11.50202  | AFAP1L1  | 0.965348186 |
| 8042 | 20.816561 | 21.56479  | CD47     | 0.965303182 |
| 8043 | 1.2898289 | 1.3365242 | LACE1    | 0.965062158 |
| 8044 | 16.794587 | 17.402596 | KAT2A    | 0.965062157 |
| 8045 | 0.725048  | 0.7512966 | SEMA6C   | 0.965062157 |
| 8046 | 1.4768884 | 1.5303557 | ZNF2     | 0.965062157 |
| 8047 | 35.436352 | 36.719243 | BCL7B    | 0.965062157 |
| 8048 | 14.337066 | 14.856107 | 10-Sep   | 0.965062157 |
| 8049 | 0.4952628 | 0.5131926 | TLR6     | 0.965062157 |
| 8050 | 22.384323 | 23.194696 | ZFP91    | 0.965062157 |
| 8051 | 11.419151 | 11.832555 | RPS17    | 0.965062157 |
| 8052 | 9.9350949 | 10.297506 | SH3RF1   | 0.964805901 |
| 8053 | 2.7813438 | 2.884564  | CELSR1   | 0.964216353 |
| 8054 | 6.4612741 | 6.7016584 | HPS3     | 0.96413063  |
| 8055 | 4.4340319 | 4.598995  | CEP41    | 0.96413063  |
| 8056 | 7.5602342 | 7.841504  | FGFR1OP  | 0.96413063  |
| 8057 | 8.7251757 | 9.0520094 | 5-Mar    | 0.963893801 |
| 8058 | 10.22695  | 10.611229 | TMED5    | 0.96378562  |
| 8059 | 15.756474 | 16.350736 | MVD      | 0.963655361 |
| 8060 | 11.831013 | 12.281822 | C12orf43 | 0.963294644 |
| 8061 | 22.255262 | 23.110555 | MED8     | 0.962991208 |
| 8062 | 46.872596 | 48.676095 | ANKRD13A | 0.962948989 |
| 8063 | 37.703372 | 39.170076 | TXNL4A   | 0.962555502 |
| 8064 | 81.942524 | 85.136591 | IER2     | 0.962483031 |
| 8065 | 7.7691951 | 8.0731006 | TENM3    | 0.96235578  |
| 8066 | 20.583931 | 21.392794 | SLC25A10 | 0.962189949 |
| 8067 | 11.988573 | 12.461292 | DYRK4    | 0.96206507  |
| 8068 | 4.4892624 | 4.6665533 | RAPGEF2  | 0.962008163 |
| 8069 | 20.320025 | 21.128156 | URM1     | 0.961750965 |
| 8070 | 10.338453 | 10.75113  | PTPRM    | 0.961615507 |
| 8071 | 29.888933 | 31.084702 | EDC4     | 0.961531895 |
| 8072 | 83.233688 | 86.595444 | SSSCA1   | 0.961178607 |
| 8073 | 11.511591 | 11.977701 | HEATR3   | 0.961085253 |
| 8074 | 10.10947  | 10.522017 | ATRN     | 0.96079197  |
| 8075 | 21.821937 | 22.718359 | AGAP3    | 0.96054196  |
| 8076 | 0.8991681 | 0.9364985 | MAP3K8   | 0.960138371 |
| 8077 | 1.0460207 | 1.0894478 | SDHAP1   | 0.960138371 |
| 8078 | 3.9150195 | 4.0775576 | HOXD-AS2 | 0.960138371 |
| 8079 | 9.4039535 | 9.7943731 | ARL5A    | 0.960138371 |
| 8080 | 17.562155 | 18.291275 | RXRΒ     | 0.960138371 |
| 8081 | 1.0076346 | 1.0494681 | ATAD2B   | 0.960138371 |
| 8082 | 21.944289 | 22.876542 | CRCP     | 0.95924853  |

|      |           |           |              |             |
|------|-----------|-----------|--------------|-------------|
| 8083 | 14.937982 | 15.579946 | TUG1         | 0.95879552  |
| 8084 | 42.428914 | 44.25837  | SEC24C       | 0.958664183 |
| 8085 | 19.248536 | 20.081495 | SPC25        | 0.958521068 |
| 8086 | 22.996942 | 23.992528 | CUL4A        | 0.958504371 |
| 8087 | 26.755917 | 27.91766  | MOV10        | 0.958386826 |
| 8088 | 8.2706851 | 8.6302472 | C1GALT1C1    | 0.958336985 |
| 8089 | 7.4992244 | 7.8252479 | OSBPL1A      | 0.958336985 |
| 8090 | 2.2506789 | 2.3490927 | STXBP5       | 0.958105615 |
| 8091 | 31.266466 | 32.642401 | SOD2         | 0.957848237 |
| 8092 | 15.539855 | 16.228973 | GPATCH8      | 0.957537779 |
| 8093 | 34.334556 | 35.859458 | RAB35        | 0.957475602 |
| 8094 | 4.9761103 | 5.197509  | TMEM255B     | 0.957402934 |
| 8095 | 2.6800347 | 2.7992757 | WDSUB1       | 0.957402934 |
| 8096 | 60.235071 | 62.941853 | SRSF9        | 0.956995528 |
| 8097 | 85.18758  | 89.015651 | CCDC85B      | 0.956995528 |
| 8098 | 40.995159 | 42.843314 | INTS1        | 0.956862464 |
| 8099 | 2.2978426 | 2.4015127 | NLRP1        | 0.95683135  |
| 8100 | 15.547792 | 16.250978 | GIT2         | 0.956729596 |
| 8101 | 21.4536   | 22.430551 | FTO          | 0.956445531 |
| 8102 | 3.5109651 | 3.6708469 | CLOCK        | 0.956445531 |
| 8103 | 8.7059843 | 9.1038584 | GDNF         | 0.95629611  |
| 8104 | 5.4475249 | 5.6972492 | DYRK1A       | 0.956167575 |
| 8105 | 17.33714  | 18.135884 | CHIC2        | 0.955957797 |
| 8106 | 116.99621 | 122.39748 | NDUFB10      | 0.955871089 |
| 8107 | 6.658131  | 6.9660743 | NUAK2        | 0.955793853 |
| 8108 | 10.456401 | 10.941524 | ZNF655       | 0.955662202 |
| 8109 | 3.3836491 | 3.5406329 | SLC1A1       | 0.955662201 |
| 8110 | 3.6196952 | 3.7876304 | ZNF544       | 0.955662201 |
| 8111 | 12.800306 | 13.396954 | JKAMP        | 0.95546389  |
| 8112 | 19.551829 | 20.466227 | LENG1        | 0.955321623 |
| 8113 | 2.8435436 | 2.9768637 | RTTN         | 0.955214584 |
| 8114 | 21.172409 | 22.168571 | BLVRA        | 0.95506424  |
| 8115 | 36.049092 | 37.745201 | NUBP2        | 0.955064239 |
| 8116 | 13.325545 | 13.953313 | ZNF444       | 0.955009426 |
| 8117 | 11.949928 | 12.520131 | RAD51        | 0.954457079 |
| 8118 | 1.1658713 | 1.2215021 | SLC30A4      | 0.954457079 |
| 8119 | 1.8307423 | 1.9180981 | FLJ37453     | 0.954457079 |
| 8120 | 4.2968969 | 4.5019279 | SLC29A4      | 0.954457079 |
| 8121 | 2.518423  | 2.6385922 | RPS18P9      | 0.954457079 |
| 8122 | 10.581639 | 11.086553 | DUS3L        | 0.954457079 |
| 8123 | 1.7574097 | 1.8412663 | CLEC11A      | 0.954457078 |
| 8124 | 1.0015194 | 1.049308  | LOC100128361 | 0.954457078 |
| 8125 | 1.5134924 | 1.5857103 | ZNF654       | 0.954457078 |

|      |           |           |           |             |
|------|-----------|-----------|-----------|-------------|
| 8126 | 1.1583113 | 1.2135813 | GPR75     | 0.954457078 |
| 8127 | 0.4253051 | 0.445599  | KLHL4     | 0.954457077 |
| 8128 | 12.093569 | 12.676914 | ZNF76     | 0.953983638 |
| 8129 | 5.1220487 | 5.3714262 | SLC9B2    | 0.953573322 |
| 8130 | 5.3109708 | 5.5704179 | PTEN      | 0.953424116 |
| 8131 | 6.4304061 | 6.744539  | DYRK3     | 0.953424116 |
| 8132 | 8.0429182 | 8.4398161 | SEC24A    | 0.952973159 |
| 8133 | 5.8025927 | 6.0894196 | KPTN      | 0.952897508 |
| 8134 | 5.6601002 | 5.9432112 | CDC40     | 0.952363971 |
| 8135 | 276.41604 | 290.27479 | TUBA1C    | 0.95225642  |
| 8136 | 8.5795279 | 9.0112141 | TOB1      | 0.952094561 |
| 8137 | 36.130745 | 37.949674 | PLEKHB2   | 0.952069981 |
| 8138 | 45.417618 | 47.707363 | GSS       | 0.952004362 |
| 8139 | 6.2692796 | 6.5858477 | ZNF691    | 0.95193206  |
| 8140 | 58.111399 | 61.045742 | PPP1R11   | 0.95193206  |
| 8141 | 78.000577 | 81.979042 | C11orf68  | 0.951469732 |
| 8142 | 5.1113776 | 5.3722015 | NXPE3     | 0.951449336 |
| 8143 | 1.3087204 | 1.3757532 | PLXNB1    | 0.951275555 |
| 8144 | 2.3989932 | 2.52187   | ZNF669    | 0.951275555 |
| 8145 | 66.217261 | 69.620695 | CTNNB1    | 0.951114622 |
| 8146 | 35.410809 | 37.232962 | ANKRD11   | 0.951060761 |
| 8147 | 28.749088 | 30.232177 | JAGN1     | 0.950943348 |
| 8148 | 10.34465  | 10.878727 | TXNDC17   | 0.950906271 |
| 8149 | 2.5375515 | 2.6685612 | UBE2W     | 0.950906271 |
| 8150 | 21.231048 | 22.334167 | MRPL13    | 0.950608461 |
| 8151 | 36.788273 | 38.70657  | NT5C      | 0.950440003 |
| 8152 | 21.859191 | 23.000385 | ZNF384    | 0.950383699 |
| 8153 | 522.38928 | 549.72327 | LDHA      | 0.95027681  |
| 8154 | 2.6778469 | 2.8183183 | ANKRD16   | 0.950157723 |
| 8155 | 23.668313 | 24.912123 | PTPN23    | 0.950072131 |
| 8156 | 16.522851 | 17.392454 | CNTROB    | 0.950001163 |
| 8157 | 4.8345604 | 5.0893831 | FBXW8     | 0.949930521 |
| 8158 | 9.6115071 | 10.118544 | TBC1D8    | 0.949890298 |
| 8159 | 4.5795718 | 4.8214506 | SECISBP2L | 0.949832771 |
| 8160 | 22.390029 | 23.575845 | TEX264    | 0.949702084 |
| 8161 | 633.25428 | 666.97094 | S100A11   | 0.949448078 |
| 8162 | 14.154669 | 14.920351 | DESI2     | 0.948682035 |
| 8163 | 10.865519 | 11.453478 | CACTIN    | 0.94866547  |
| 8164 | 2.1285    | 2.2456585 | H3F3A     | 0.947828905 |
| 8165 | 2.2657717 | 2.390486  | DHFRL1    | 0.947828905 |
| 8166 | 2.040195  | 2.1524929 | VPS13C    | 0.947828904 |
| 8167 | 3.9410794 | 4.1580072 | FBXO4     | 0.947828904 |
| 8168 | 1.1461973 | 1.2092871 | RMDN2     | 0.947828904 |

|      |           |           |           |              |
|------|-----------|-----------|-----------|--------------|
| 8169 | 2.1118328 | 2.2280739 | LINC00857 | 0.947828904  |
| 8170 | 1.1853126 | 1.2505554 | CGREF1    | 0.947828904  |
| 8171 | 2.8932198 | 3.0524706 | SPAG16    | 0.947828904  |
| 8172 | 3.4945038 | 3.6868509 | SYTL4     | 0.947828904  |
| 8173 | 4.1591675 | 4.3880995 | SNN       | 0.947828904  |
| 8174 | 0.477433  | 0.5037122 | KIAA1456  | 0.947828904  |
| 8175 | 6.268064  | 6.6154714 | LRRK1     | 0.947485613  |
| 8176 | 16.490962 | 17.40751  | SRC       | 0.947347528  |
| 8177 | 7.3063832 | 7.71444   | UBE2Q2    | 0.947104818  |
| 8178 | 6.7831585 | 7.1656971 | ABTB1     | 0.9466615295 |
| 8179 | 23.09082  | 24.395922 | DR1       | 0.946503269  |
| 8180 | 81.929215 | 86.608457 | NCOR2     | 0.945972458  |
| 8181 | 9.0909948 | 9.6117088 | CEP95     | 0.945825038  |
| 8182 | 2.1113012 | 2.232463  | EVI5      | 0.945727288  |
| 8183 | 36.918455 | 39.041553 | ESD       | 0.945619513  |
| 8184 | 8.5615025 | 9.0541702 | JAG1      | 0.94558666   |
| 8185 | 60.77232  | 64.323781 | NDUFS7    | 0.944787742  |
| 8186 | 5.4998442 | 5.8221739 | POLL      | 0.944637561  |
| 8187 | 4.094945  | 4.3349378 | USP30     | 0.944637561  |
| 8188 | 5.7585668 | 6.0968517 | KCTD1     | 0.944514817  |
| 8189 | 22.95759  | 24.30824  | GET4      | 0.944436532  |
| 8190 | 9.4242573 | 9.9824506 | DCTN5     | 0.944082545  |
| 8191 | 1.3225716 | 1.4009068 | ZNF559    | 0.944082545  |
| 8192 | 14.288557 | 15.137591 | GTF2H1    | 0.943912256  |
| 8193 | 2.4662663 | 2.6131769 | ZNF652    | 0.943780825  |
| 8194 | 41.840053 | 44.336654 | ARPC5L    | 0.943689914  |
| 8195 | 5.2959051 | 5.6121731 | H2AFJ     | 0.943646076  |
| 8196 | 38.839556 | 41.204413 | MCRS1     | 0.942606707  |
| 8197 | 209.1685  | 221.9588  | PGK1      | 0.942375344  |
| 8198 | 3.4132766 | 3.6219927 | UST       | 0.942375343  |
| 8199 | 16.984597 | 18.025195 | ZCCHC3    | 0.942269791  |
| 8200 | 52.69046  | 55.924809 | KLHDC3    | 0.942166113  |
| 8201 | 5.4044146 | 5.736656  | HIPK3     | 0.942084487  |
| 8202 | 7.3658444 | 7.8186665 | GOPC      | 0.942084487  |
| 8203 | 20.95923  | 22.247718 | HDGFRP3   | 0.942084487  |
| 8204 | 9.4413033 | 10.021716 | LEF1      | 0.942084487  |
| 8205 | 102.06565 | 108.40151 | PIGT      | 0.941551892  |
| 8206 | 5.5853996 | 5.9330869 | TADA1     | 0.941398586  |
| 8207 | 3.9467497 | 4.1933134 | DZIP1     | 0.94120073   |
| 8208 | 12.264273 | 13.032146 | PACS2     | 0.941078552  |
| 8209 | 3.3037748 | 3.511507  | SNX13     | 0.940842451  |
| 8210 | 8.0036939 | 8.5109393 | ZKSCAN1   | 0.940400778  |
| 8211 | 1.163593  | 1.2378706 | HOXA2     | 0.939995608  |

|      |           |           |           |             |
|------|-----------|-----------|-----------|-------------|
| 8212 | 3.1647608 | 3.3667826 | TMEM168   | 0.939995608 |
| 8213 | 1.4645081 | 1.5579946 | GRTP1     | 0.939995608 |
| 8214 | 1.3358942 | 1.4211707 | C17orf100 | 0.939995608 |
| 8215 | 2.524743  | 2.6859094 | KDM6A     | 0.939995608 |
| 8216 | 0.9076633 | 0.9656038 | FAM185A   | 0.939995608 |
| 8217 | 2.3681761 | 2.5193481 | SFT2D2    | 0.939995608 |
| 8218 | 1.0435628 | 1.1101784 | MAP3K7CL  | 0.939995608 |
| 8219 | 14.529517 | 15.457005 | GNA13     | 0.939995608 |
| 8220 | 1.3847143 | 1.4731072 | CCDC24    | 0.939995607 |
| 8221 | 0.6136617 | 0.6528346 | FOXA1     | 0.939995607 |
| 8222 | 1.0555436 | 1.122924  | BEND3P3   | 0.939995607 |
| 8223 | 45.022156 | 47.915149 | BUD31     | 0.939622594 |
| 8224 | 26.666547 | 28.399669 | NUMA1     | 0.938973873 |
| 8225 | 39.057217 | 41.605169 | B4GALT2   | 0.938758772 |
| 8226 | 15.009985 | 15.989182 | NRBF2     | 0.938758772 |
| 8227 | 6.7006363 | 7.1377616 | C19orf55  | 0.938758771 |
| 8228 | 21.13266  | 22.516022 | EP400     | 0.938561021 |
| 8229 | 3.1845559 | 3.3930614 | ABCB10    | 0.938549461 |
| 8230 | 2.159352  | 2.3014556 | SLC22A15  | 0.938254875 |
| 8231 | 8.588373  | 9.1535608 | NME6      | 0.938254875 |
| 8232 | 2.4839639 | 2.6474298 | LYPD6     | 0.938254875 |
| 8233 | 0.8472227 | 0.9029772 | SLC16A7   | 0.938254875 |
| 8234 | 8.2945075 | 8.8422167 | PPM1M     | 0.938057472 |
| 8235 | 20.98325  | 22.372207 | SRI       | 0.937915971 |
| 8236 | 4.687186  | 4.9980147 | RBM48     | 0.937809571 |
| 8237 | 240.76358 | 256.74142 | HSPA5     | 0.937766809 |
| 8238 | 15.525718 | 16.5597   | SLC41A3   | 0.937560386 |
| 8239 | 11.550092 | 12.325908 | CCDC9     | 0.937058121 |
| 8240 | 9.9270685 | 10.600763 | TMEM87A   | 0.936448454 |
| 8241 | 218.63575 | 233.53151 | PPDPF     | 0.936215191 |
| 8242 | 14.071466 | 15.033011 | IL4R      | 0.936037731 |
| 8243 | 5.6396772 | 6.0256573 | KIAA0430  | 0.935943902 |
| 8244 | 12.067677 | 12.895145 | RAB3GAP1  | 0.93583107  |
| 8245 | 7.6097191 | 8.134218  | CBX8      | 0.935519438 |
| 8246 | 3.9695143 | 4.2431126 | ZNF446    | 0.935519438 |
| 8247 | 1.6806411 | 1.7964791 | FTX       | 0.935519438 |
| 8248 | 10.136105 | 10.83776  | POM121    | 0.935258229 |
| 8249 | 18.646271 | 19.942629 | COX14     | 0.934995631 |
| 8250 | 18.281791 | 19.555014 | CUL1      | 0.9348902   |
| 8251 | 30.243698 | 32.352991 | CYB5B     | 0.934803772 |
| 8252 | 3.6036705 | 3.8559559 | ZNF133    | 0.934572556 |
| 8253 | 15.108652 | 16.181792 | TELO2     | 0.933682204 |
| 8254 | 92.962522 | 99.574234 | CENPB     | 0.933600173 |



|      |           |           |           |             |
|------|-----------|-----------|-----------|-------------|
| 8255 | 31.22534  | 33.447959 | CCDC137   | 0.933549924 |
| 8256 | 59.686624 | 63.935118 | CDK2AP1   | 0.933549924 |
| 8257 | 2.0069707 | 2.1508229 | TRIQQ     | 0.933117591 |
| 8258 | 19.54898  | 20.957409 | C20orf111 | 0.932795641 |
| 8259 | 8.1125899 | 8.69868   | C4orf46   | 0.932623093 |
| 8260 | 1.5620023 | 1.6754454 | PLAG1     | 0.932290726 |
| 8261 | 36.68198  | 39.356153 | WDR34     | 0.932051983 |
| 8262 | 80.351216 | 86.225575 | MRPL11    | 0.931872189 |
| 8263 | 22.669411 | 24.328056 | RHNO1     | 0.931821733 |
| 8264 | 10.064051 | 10.801445 | VPS4B     | 0.931731911 |
| 8265 | 3.011406  | 3.2332559 | BRIP1     | 0.931384961 |
| 8266 | 233.26843 | 250.49068 | SLC25A3   | 0.931245963 |
| 8267 | 544.03559 | 584.28219 | S100A6    | 0.931117871 |
| 8268 | 1.5944422 | 1.7133566 | ERI2      | 0.930595652 |
| 8269 | 0.5199877 | 0.5587686 | TMEM86A   | 0.930595652 |
| 8270 | 5.7584072 | 6.1878725 | WDR92     | 0.930595652 |
| 8271 | 0.8585926 | 0.9226269 | PRDM16    | 0.930595652 |
| 8272 | 49.289508 | 52.965548 | C9orf16   | 0.930595652 |
| 8273 | 27.332021 | 29.370459 | PTPRA     | 0.930595652 |
| 8274 | 6.7629645 | 7.2673503 | PTRH1     | 0.930595652 |
| 8275 | 5.0329039 | 5.4082607 | ABHD14A   | 0.930595652 |
| 8276 | 1.6130686 | 1.7333722 | LINC00265 | 0.930595652 |
| 8277 | 3.9353661 | 4.228868  | FBXL15    | 0.930595651 |
| 8278 | 0.8358269 | 0.8981633 | CCT6P3    | 0.930595651 |
| 8279 | 18.588595 | 19.981691 | POLR1A    | 0.930281367 |
| 8280 | 11.300882 | 12.151251 | ZNF512B   | 0.930018001 |
| 8281 | 35.348079 | 38.019858 | RAB10     | 0.929726748 |
| 8282 | 53.730423 | 57.821104 | TXN2      | 0.929252801 |
| 8283 | 13.640067 | 14.694458 | BCL2L2    | 0.928245663 |
| 8284 | 100.62492 | 108.45681 | U2AF2     | 0.927787873 |
| 8285 | 9.0222637 | 9.7269366 | TRIM35    | 0.927554489 |
| 8286 | 6.4236329 | 6.9253429 | C8orf82   | 0.927554489 |
| 8287 | 109.70098 | 118.29982 | PRELID1   | 0.927313127 |
| 8288 | 24.074277 | 25.965356 | EHMT2     | 0.927169157 |
| 8289 | 89.81157  | 96.874141 | DAZAP1    | 0.927095393 |
| 8290 | 1.966033  | 2.1207865 | CARD8     | 0.927030151 |
| 8291 | 6.7364944 | 7.2667479 | ABHD6     | 0.927030151 |
| 8292 | 4.5724785 | 4.9323946 | HHIP      | 0.927030151 |
| 8293 | 13.096143 | 14.134048 | MTIF3     | 0.926567099 |
| 8294 | 2.0160132 | 2.1764447 | TSTD2     | 0.926287339 |
| 8295 | 26.464683 | 28.574259 | SCRIB     | 0.926172143 |
| 8296 | 15.467472 | 16.709454 | CDK11B    | 0.925671866 |
| 8297 | 13.045438 | 14.094624 | CAMK2G    | 0.925561218 |

|      |           |           |           |             |
|------|-----------|-----------|-----------|-------------|
| 8298 | 1.0157086 | 1.097881  | PANK1     | 0.925153572 |
| 8299 | 2.808767  | 3.0360009 | LOC730101 | 0.925153572 |
| 8300 | 6.4064946 | 6.9247904 | HSCB      | 0.925153572 |
| 8301 | 2.4182877 | 2.6139311 | FAM200B   | 0.925153571 |
| 8302 | 70.572487 | 76.299893 | CORO1C    | 0.924935598 |
| 8303 | 25.37589  | 27.438866 | ARHGAP23  | 0.924815554 |
| 8304 | 15.748073 | 17.030262 | PPP6C     | 0.924711126 |
| 8305 | 23.984597 | 25.945205 | CMTM3     | 0.924432766 |
| 8306 | 3.8387669 | 4.1530309 | ANKRD13B  | 0.924329014 |
| 8307 | 10.04877  | 10.878797 | FAM120AOS | 0.92370235  |
| 8308 | 73.175453 | 79.251854 | KXD1      | 0.923327954 |
| 8309 | 1.8172262 | 1.968378  | ADAMTSL5  | 0.923209972 |
| 8310 | 28.372381 | 30.747885 | VAC14     | 0.922742524 |
| 8311 | 37.598253 | 40.765045 | CTDSP1    | 0.922315988 |
| 8312 | 12.51179  | 13.56572  | HMGXB4    | 0.922309279 |
| 8313 | 7.0898799 | 7.6879076 | PIGP      | 0.922211907 |
| 8314 | 1.557686  | 1.689076  | SEMA4G    | 0.922211907 |
| 8315 | 133.96298 | 145.29938 | SUMO3     | 0.921979025 |
| 8316 | 14.267848 | 15.479625 | YTHDF3    | 0.921717915 |
| 8317 | 25.899856 | 28.100581 | ELAVL1    | 0.921684005 |
| 8318 | 3.6718434 | 3.9841861 | EZH1      | 0.921604389 |
| 8319 | 148.27557 | 160.88852 | ERGIC3    | 0.921604389 |
| 8320 | 68.223721 | 74.035118 | EFTUD2    | 0.921504865 |
| 8321 | 51.432641 | 55.818214 | NCOA4     | 0.921431147 |
| 8322 | 5.5462776 | 6.0192517 | PIK3C2A   | 0.921423114 |
| 8323 | 6.6949688 | 7.2662262 | PHKB      | 0.921381833 |
| 8324 | 6.9561141 | 7.5511796 | MFSD3     | 0.921195696 |
| 8325 | 57.688851 | 62.637853 | BCAR1     | 0.920990232 |
| 8326 | 14.70145  | 15.964186 | TMEM208   | 0.920901947 |
| 8327 | 13.108856 | 14.235561 | SOX12     | 0.92085284  |
| 8328 | 49.265514 | 53.502433 | SMG5      | 0.920808866 |
| 8329 | 9.7382944 | 10.577277 | KIAA0196  | 0.92068063  |
| 8330 | 6.4239492 | 6.9773915 | SLC9A8    | 0.920680629 |
| 8331 | 5.0142266 | 5.4472391 | MAGOHB    | 0.920507894 |
| 8332 | 2.1575895 | 2.343912  | GAREM     | 0.920507894 |
| 8333 | 99.551991 | 108.16884 | LSM3      | 0.920338863 |
| 8334 | 5.2691919 | 5.7257911 | RELT      | 0.9202557   |
| 8335 | 7.5084372 | 8.1595157 | RBM33     | 0.920206227 |
| 8336 | 5.6380366 | 6.1311152 | ZNF318    | 0.91957767  |
| 8337 | 0.9195786 | 1.0005133 | CCDC103   | 0.919106817 |
| 8338 | 14.549112 | 15.829621 | DFNA5     | 0.919106817 |
| 8339 | 4.4975198 | 4.8933592 | TMEM64    | 0.919106816 |
| 8340 | 2.6508743 | 2.8841852 | VCPIP1    | 0.919106816 |

|      |           |           |           |             |
|------|-----------|-----------|-----------|-------------|
| 8341 | 4.7634171 | 5.1826589 | ACYPI     | 0.919106816 |
| 8342 | 24.313275 | 26.453155 | PPP1R35   | 0.919106816 |
| 8343 | 1.0079782 | 1.0966932 | NOXO1     | 0.919106816 |
| 8344 | 1.3169005 | 1.4328046 | INO80B    | 0.919106816 |
| 8345 | 2.3681761 | 2.576606  | RBP7      | 0.919106816 |
| 8346 | 0.5007346 | 0.5448057 | RTKN2     | 0.919106816 |
| 8347 | 0.6424647 | 0.6990099 | ALG11     | 0.919106815 |
| 8348 | 43.344478 | 47.165    | EPB41L2   | 0.918996665 |
| 8349 | 55.489453 | 60.451786 | DDX17     | 0.917912551 |
| 8350 | 101.22708 | 110.30659 | PSMD4     | 0.917688442 |
| 8351 | 9.8719956 | 10.761085 | NDUFC2    | 0.917379172 |
| 8352 | 3.3247062 | 3.6242927 | PRR14L    | 0.917339304 |
| 8353 | 22.795441 | 24.855767 | SLC25A37  | 0.917108758 |
| 8354 | 19.499151 | 21.264717 | CDC27     | 0.916972067 |
| 8355 | 10.848884 | 11.834226 | LINC00116 | 0.916737984 |
| 8356 | 2.7881923 | 3.0422317 | CEP57L1   | 0.916495718 |
| 8357 | 11.023276 | 12.029482 | C12orf49  | 0.916355    |
| 8358 | 0.9133868 | 0.9973384 | PFKFB2    | 0.915824292 |
| 8359 | 28.028223 | 30.611905 | ERLIN1    | 0.915598775 |
| 8360 | 3.8924389 | 4.25195   | ENPP1     | 0.915447952 |
| 8361 | 68.824955 | 75.198864 | PDAP1     | 0.915239288 |
| 8362 | 6.9181985 | 7.5596735 | NBN       | 0.915145149 |
| 8363 | 29.21767  | 31.933368 | PAIP1     | 0.91495735  |
| 8364 | 3.7578899 | 4.1083842 | PARP16    | 0.914688033 |
| 8365 | 48.12304  | 52.617045 | UBE2E3    | 0.914590321 |
| 8366 | 141.70144 | 154.96076 | NDUFV1    | 0.914434324 |
| 8367 | 6.5477633 | 7.1622637 | ERI1      | 0.914203045 |
| 8368 | 37.461444 | 40.985359 | COPB2     | 0.914020157 |
| 8369 | 3.5297777 | 3.8619947 | RIMKLB    | 0.913977872 |
| 8370 | 14.397796 | 15.754094 | NEDD4L    | 0.913908248 |
| 8371 | 7.5277386 | 8.2381725 | HOTAIRM1  | 0.913763172 |
| 8372 | 28.735911 | 31.451141 | KLF10     | 0.913668315 |
| 8373 | 25.751236 | 28.188723 | PEG10     | 0.913529712 |
| 8374 | 17.513913 | 19.175794 | UBN1      | 0.913334468 |
| 8375 | 18.352503 | 20.09611  | ELP6      | 0.913236609 |
| 8376 | 7.7031162 | 8.4358675 | ZSWIM6    | 0.91313859  |
| 8377 | 7.9425352 | 8.6988092 | TAF1C     | 0.913060061 |
| 8378 | 6.4206231 | 7.0324787 | GMEB1     | 0.912995734 |
| 8379 | 3.0134423 | 3.3006093 | MECOM     | 0.912995734 |
| 8380 | 3.8873185 | 4.2596319 | PSD3      | 0.912594926 |
| 8381 | 2.4166931 | 2.64887   | GORAB     | 0.912348678 |
| 8382 | 6.8514904 | 7.509728  | NBAS      | 0.912348678 |
| 8383 | 15.290539 | 16.763784 | ZRANB2    | 0.912117411 |

|      |           |           |          |             |
|------|-----------|-----------|----------|-------------|
| 8384 | 14.486446 | 15.885545 | TMEM161A | 0.911926294 |
| 8385 | 15.921381 | 17.460148 | SPR      | 0.911869755 |
| 8386 | 19.935652 | 21.864165 | ARMC1    | 0.911795739 |
| 8387 | 10.495889 | 11.512764 | MICAL3   | 0.911674114 |
| 8388 | 20.755336 | 22.768601 | ODF2     | 0.911577136 |
| 8389 | 16.426784 | 18.020749 | CNOT8    | 0.911548372 |
| 8390 | 30.433433 | 33.392101 | RIN1     | 0.911396189 |
| 8391 | 70.572169 | 77.433311 | POLR2C   | 0.911392884 |
| 8392 | 27.948359 | 30.679771 | MAP2K3   | 0.910970248 |
| 8393 | 2.9554548 | 3.2445418 | TATDN3   | 0.910900506 |
| 8394 | 15.68166  | 17.221564 | HECTD3   | 0.910582841 |
| 8395 | 18.873669 | 20.733543 | CDC23    | 0.91029636  |
| 8396 | 13.253973 | 14.568143 | WDFY1    | 0.909791545 |
| 8397 | 31.028792 | 34.111866 | RAF1     | 0.90961873  |
| 8398 | 59.624774 | 65.553048 | ACOT7    | 0.909565242 |
| 8399 | 7.1788222 | 7.893303  | NDOR1    | 0.909482661 |
| 8400 | 1.3562596 | 1.4913499 | C5orf42  | 0.909417438 |
| 8401 | 5.9149158 | 6.5040713 | C6orf211 | 0.909417437 |
| 8402 | 23.042072 | 25.340399 | PHF19    | 0.909301874 |
| 8403 | 55.040704 | 60.53458  | TMED3    | 0.909244011 |
| 8404 | 1.6604241 | 1.826242  | KIN      | 0.909202648 |
| 8405 | 20.931959 | 23.024506 | CMAS     | 0.909116525 |
| 8406 | 0.6294746 | 0.6927486 | TET1     | 0.908662422 |
| 8407 | 21.96778  | 24.180485 | RGMB     | 0.908492132 |
| 8408 | 27.457615 | 30.226058 | GALE     | 0.908408711 |
| 8409 | 9.648125  | 10.622892 | YEATS4   | 0.908238999 |
| 8410 | 11.903661 | 13.109699 | TRIM5    | 0.90800416  |
| 8411 | 58.246258 | 64.150621 | AK2      | 0.907960931 |
| 8412 | 1.08322   | 1.1931074 | HECW2    | 0.907898196 |
| 8413 | 45.73945  | 50.420576 | CDK2AP2  | 0.907158428 |
| 8414 | 4.8442469 | 5.3408774 | PPAPDC1B | 0.907013306 |
| 8415 | 13.909569 | 15.340293 | WRAP73   | 0.906734224 |
| 8416 | 41.324842 | 45.593881 | CEBPB    | 0.90636815  |
| 8417 | 3.1202793 | 3.4427194 | SLC9A6   | 0.906341444 |
| 8418 | 10.90267  | 12.030627 | CBLL1    | 0.906242869 |
| 8419 | 6.6976354 | 7.3909182 | LRRC57   | 0.906198013 |
| 8420 | 4.5481704 | 5.0189587 | FAM111B  | 0.906198013 |
| 8421 | 7.291075  | 8.0463403 | HDAC9    | 0.906135551 |
| 8422 | 6.580222  | 7.262311  | NR4A1    | 0.90607824  |
| 8423 | 7.8867423 | 8.7055302 | AGO1     | 0.905946231 |
| 8424 | 62.319741 | 68.841446 | UROD     | 0.905264846 |
| 8425 | 116.47988 | 128.68595 | HM13     | 0.905148419 |
| 8426 | 0.1109942 | 0.12268   | TNXB     | 0.904745775 |

|      |           |           |              |             |
|------|-----------|-----------|--------------|-------------|
| 8427 | 0.4284278 | 0.4735339 | ZNF519       | 0.904745774 |
| 8428 | 0.615007  | 0.6797567 | MTHFD2L      | 0.904745773 |
| 8429 | 11.322003 | 12.514016 | IFT52        | 0.904745773 |
| 8430 | 0.8761541 | 0.9683981 | RND1         | 0.904745773 |
| 8431 | 14.477761 | 16.002021 | DOCK1        | 0.904745773 |
| 8432 | 0.9038392 | 0.998998  | TM7SF2       | 0.904745773 |
| 8433 | 25.931205 | 28.661316 | CD24         | 0.904745772 |
| 8434 | 5.0427533 | 5.5736689 | ZNF74        | 0.904745772 |
| 8435 | 1.7958102 | 1.9848783 | TRIM13       | 0.904745772 |
| 8436 | 24.15226  | 26.695079 | AIDA         | 0.904745772 |
| 8437 | 10.170892 | 11.241713 | SWI5         | 0.904745772 |
| 8438 | 6.4222557 | 7.0984092 | RPS6KA3      | 0.904745772 |
| 8439 | 2.2076218 | 2.4400466 | LOC100652772 | 0.904745772 |
| 8440 | 8.7879307 | 9.7131493 | RN7SK        | 0.904745772 |
| 8441 | 123.57574 | 136.58614 | SEC61G       | 0.904745772 |
| 8442 | 3.818839  | 4.2208973 | RAB3A        | 0.904745772 |
| 8443 | 0.4300697 | 0.4753487 | ZNF695       | 0.904745772 |
| 8444 | 0.9203763 | 1.0172762 | DHRS4L2      | 0.904745772 |
| 8445 | 0.5525744 | 0.6107511 | PPIEL        | 0.904745772 |
| 8446 | 0.7649693 | 0.8455075 | OSR2         | 0.904745772 |
| 8447 | 0.2911769 | 0.3218329 | SMG1P1       | 0.90474577  |
| 8448 | 65.112006 | 71.989887 | AP3D1        | 0.904460454 |
| 8449 | 21.2138   | 23.459261 | REXO4        | 0.904282513 |
| 8450 | 11.607605 | 12.837111 | MTRF1L       | 0.904222496 |
| 8451 | 7.3769735 | 8.1613636 | NAPG         | 0.903889816 |
| 8452 | 158.511   | 175.37058 | ATP5G2       | 0.903863093 |
| 8453 | 19.344928 | 21.40999  | GTPBP1       | 0.903546798 |
| 8454 | 15.527806 | 17.190846 | CHCHD6       | 0.903260147 |
| 8455 | 19.776131 | 21.895905 | RBMX2        | 0.903188551 |
| 8456 | 18.380735 | 20.350938 | EXOSC9       | 0.90318855  |
| 8457 | 2.1748475 | 2.4086681 | ACADSB       | 0.902925358 |
| 8458 | 7.2792943 | 8.0635851 | ARID1B       | 0.902736714 |
| 8459 | 57.78914  | 64.025789 | MAT2A        | 0.902591616 |
| 8460 | 20.123017 | 22.297905 | PRPS2        | 0.902462214 |
| 8461 | 6.2506335 | 6.9273903 | LTBP1        | 0.902307105 |
| 8462 | 11.419151 | 12.659871 | ALG2         | 0.901995785 |
| 8463 | 10.594854 | 11.752637 | MGAT5        | 0.901487384 |
| 8464 | 1453.3123 | 1612.3828 | RPS11        | 0.901344473 |
| 8465 | 185.02924 | 205.28651 | RPN1         | 0.901321947 |
| 8466 | 5.6972525 | 6.3219325 | ATP2B1       | 0.90118845  |
| 8467 | 5.6340218 | 6.2517687 | PLD2         | 0.90118845  |
| 8468 | 5.3548313 | 5.9428599 | HINFP        | 0.901052933 |
| 8469 | 30.940696 | 34.356546 | LRFN4        | 0.900576437 |

|      |           |           |          |             |
|------|-----------|-----------|----------|-------------|
| 8470 | 4.572145  | 5.0769095 | ACSS1    | 0.900576437 |
| 8471 | 6.6679878 | 7.4112628 | STAMBPL1 | 0.899710082 |
| 8472 | 85.217625 | 94.719676 | AURKAIP1 | 0.899682394 |
| 8473 | 11.613311 | 12.911797 | SLC25A17 | 0.899434153 |
| 8474 | 7.2164061 | 8.0260211 | BRAP     | 0.899126233 |
| 8475 | 1.4135967 | 1.5721894 | SLC4A8   | 0.899126233 |
| 8476 | 1.1207287 | 1.2464642 | HKDC1    | 0.899126233 |
| 8477 | 47.274207 | 52.59471  | RAVER1   | 0.898839583 |
| 8478 | 14.351095 | 15.968619 | FJX1     | 0.898706081 |
| 8479 | 4.0871966 | 4.5503391 | CAPN7    | 0.898218025 |
| 8480 | 45.328772 | 50.477913 | BLCAP    | 0.8979922   |
| 8481 | 4.3803717 | 4.8782281 | ZFAT     | 0.897943173 |
| 8482 | 8.6800833 | 9.6689001 | CASP3    | 0.897732239 |
| 8483 | 17.484846 | 19.482501 | IDS      | 0.897464116 |
| 8484 | 11.247216 | 12.532698 | SLC25A43 | 0.897429769 |
| 8485 | 17.404461 | 19.393674 | MAD1L1   | 0.897429769 |
| 8486 | 5.3762879 | 5.9926776 | MTERFD2  | 0.897142867 |
| 8487 | 21.949123 | 24.475826 | CRKL     | 0.896767415 |
| 8488 | 39.12304  | 43.646356 | TCEAL4   | 0.896364412 |
| 8489 | 20.671004 | 23.066993 | BCAT2    | 0.896129146 |
| 8490 | 5.8324941 | 6.5085419 | RCAN3    | 0.896129146 |
| 8491 | 20.23464  | 22.580049 | WDR61    | 0.896129146 |
| 8492 | 18.267796 | 20.385226 | ATG16L1  | 0.896129146 |
| 8493 | 0.4558629 | 0.5087023 | MMAA     | 0.896129145 |
| 8494 | 13.024969 | 14.538174 | POLG     | 0.895915068 |
| 8495 | 12.961016 | 14.46696  | FAM122B  | 0.895904609 |
| 8496 | 9.1347385 | 10.204087 | C16orf70 | 0.895203871 |
| 8497 | 48.88482  | 54.616454 | CBS      | 0.895056638 |
| 8498 | 12.378978 | 13.831715 | SBDSP1   | 0.894970608 |
| 8499 | 18.893186 | 21.111597 | EML3     | 0.894919795 |
| 8500 | 8.6342542 | 9.6517398 | ACSF3    | 0.89458009  |
| 8501 | 6.9661921 | 7.7877581 | BMPR2    | 0.894505456 |
| 8502 | 0.984613  | 1.1010291 | FMN1     | 0.894266092 |
| 8503 | 1.5516017 | 1.7350559 | PDXDC2P  | 0.894266091 |
| 8504 | 13.25802  | 14.825587 | ISCA1    | 0.894266091 |
| 8505 | 10.37622  | 11.606835 | ABHD11   | 0.893974989 |
| 8506 | 90.831938 | 101.61032 | TLN1     | 0.893924327 |
| 8507 | 4.5401002 | 5.0795912 | GAS2L3   | 0.893792434 |
| 8508 | 2.0778836 | 2.3247943 | STRIP2   | 0.893792434 |
| 8509 | 39.277787 | 43.951244 | UBE2N    | 0.893667253 |
| 8510 | 109.56464 | 122.62411 | PSMB5    | 0.893499996 |
| 8511 | 36.483445 | 40.83307  | HSPBP1   | 0.893477877 |
| 8512 | 3.2533863 | 3.6413661 | STAM2    | 0.893452136 |

|      |           |           |           |             |
|------|-----------|-----------|-----------|-------------|
| 8513 | 13.911575 | 15.575056 | TBL2      | 0.893195827 |
| 8514 | 7.0111201 | 7.849477  | BCAP29    | 0.893195826 |
| 8515 | 5.1951767 | 5.8176943 | PRSS12    | 0.892995827 |
| 8516 | 1.5287994 | 1.7119894 | ADORA2A   | 0.892995827 |
| 8517 | 2.9179002 | 3.2675406 | TEFM      | 0.892995827 |
| 8518 | 174.98913 | 196.01376 | RPL31     | 0.892738998 |
| 8519 | 11.392615 | 12.764432 | TRRAP     | 0.892528168 |
| 8520 | 36.037029 | 40.377574 | CAMK2N1   | 0.892501093 |
| 8521 | 28.792036 | 32.265335 | C19orf24  | 0.892351995 |
| 8522 | 11.136393 | 12.485265 | SKA1      | 0.891962865 |
| 8523 | 53.007538 | 59.428525 | KIF22     | 0.891954473 |
| 8524 | 19.870372 | 22.284871 | PNPO      | 0.891652976 |
| 8525 | 9.9112001 | 11.119    | COPG2     | 0.891375145 |
| 8526 | 54.707643 | 61.38731  | ZWINT     | 0.891188143 |
| 8527 | 22.308781 | 25.035252 | TJP1      | 0.891094713 |
| 8528 | 20.000426 | 22.447272 | CHCHD1    | 0.890995836 |
| 8529 | 32.189095 | 36.137401 | SORBS3    | 0.890741841 |
| 8530 | 20.704918 | 23.245475 | TSEN34    | 0.890707448 |
| 8531 | 29.531802 | 33.155837 | BCKDK     | 0.890696925 |
| 8532 | 38.62724  | 43.377319 | TFPI2     | 0.890493938 |
| 8533 | 3.034469  | 3.4080425 | PABPC1L   | 0.890384728 |
| 8534 | 134.99038 | 151.65904 | MYBL2     | 0.890091218 |
| 8535 | 5.0176445 | 5.6383484 | ZKSCAN5   | 0.889913874 |
| 8536 | 6.7254963 | 7.559143  | ZNF584    | 0.889716773 |
| 8537 | 3.3730453 | 3.791145  | LOC729852 | 0.889716773 |
| 8538 | 43.088852 | 48.438681 | OGDH      | 0.88955461  |
| 8539 | 4.8528016 | 5.4556096 | XIAP      | 0.889506761 |
| 8540 | 7.8567201 | 8.8331526 | C1orf159  | 0.889458209 |
| 8541 | 5.4112171 | 6.0837227 | ITPKB     | 0.889458209 |
| 8542 | 12.167126 | 13.67998  | STX2      | 0.889411098 |
| 8543 | 12.621378 | 14.19351  | COA6      | 0.889235845 |
| 8544 | 10.662047 | 11.995017 | URGCP     | 0.888873039 |
| 8545 | 4.4168633 | 4.969898  | KDM3A     | 0.88872312  |
| 8546 | 2.3034911 | 2.5919109 | DENND5B   | 0.88872312  |
| 8547 | 8.7351222 | 9.830869  | KDM6B     | 0.888540191 |
| 8548 | 105.86784 | 119.1649  | NDUFV2    | 0.888414621 |
| 8549 | 18.053069 | 20.321747 | LLGL1     | 0.888362046 |
| 8550 | 3.1147987 | 3.5066125 | ENTPD7    | 0.888264306 |
| 8551 | 21.161389 | 23.833422 | SEC23A    | 0.887887156 |
| 8552 | 28.873865 | 32.527515 | CBX6      | 0.887675098 |
| 8553 | 17.42651  | 19.63354  | CCDC101   | 0.887588773 |
| 8554 | 4.0862647 | 4.604177  | TTC39C    | 0.887512519 |
| 8555 | 12.379044 | 13.949088 | PHF13     | 0.887444672 |

|      |           |           |               |             |
|------|-----------|-----------|---------------|-------------|
| 8556 | 13.327875 | 15.020215 | HSD17B11      | 0.887329187 |
| 8557 | 62.182426 | 70.08333  | AP1S1         | 0.887264147 |
| 8558 | 3.6566139 | 4.121361  | TRERF1        | 0.887234564 |
| 8559 | 285.95117 | 322.50847 | PRDX1         | 0.88664702  |
| 8560 | 44.191092 | 49.853327 | FAM65A        | 0.886422119 |
| 8561 | 0.4177738 | 0.4713782 | LOC100288198  | 0.886281574 |
| 8562 | 0.5336735 | 0.6021489 | TRABD2B       | 0.886281574 |
| 8563 | 0.3773075 | 0.4257197 | LINC00547     | 0.886281574 |
| 8564 | 0.6700949 | 0.7560745 | TMEM133       | 0.886281574 |
| 8565 | 1.4229269 | 1.6055021 | MRPS31P5      | 0.886281573 |
| 8566 | 0.3008655 | 0.3394694 | FGD4          | 0.886281573 |
| 8567 | 1.4522613 | 1.6386004 | SETD9         | 0.886281573 |
| 8568 | 3.5982648 | 4.0599566 | TCTEX1D2      | 0.886281573 |
| 8569 | 8.3984299 | 9.476029  | RBBP9         | 0.886281573 |
| 8570 | 1.2343504 | 1.3927294 | TOPORS-AS1    | 0.886281573 |
| 8571 | 14.669678 | 16.551938 | MCU           | 0.886281573 |
| 8572 | 74.583102 | 84.152829 | PPIF          | 0.886281573 |
| 8573 | 1.2924    | 1.4582273 | CDK5R1        | 0.886281573 |
| 8574 | 11.206709 | 12.644637 | BAIAP2L1      | 0.886281573 |
| 8575 | 0.3196856 | 0.3607043 | ZNF738        | 0.886281573 |
| 8576 | 0.7944072 | 0.8963373 | KDM4A-AS1     | 0.886281572 |
| 8577 | 0.3978988 | 0.448953  | P2RX5-TAX1BP3 | 0.886281572 |
| 8578 | 0.4561828 | 0.5147154 | YY2           | 0.886281572 |
| 8579 | 96.145663 | 108.56321 | NDUFA3        | 0.88561918  |
| 8580 | 3.3506757 | 3.785647  | FNIP1         | 0.885099864 |
| 8581 | 15.576674 | 17.60174  | DUSP12        | 0.88495082  |
| 8582 | 41.066378 | 46.41534  | CIAPIN1       | 0.884758752 |
| 8583 | 41.306599 | 46.698197 | THOP1         | 0.884543766 |
| 8584 | 28.448186 | 32.162344 | INF2          | 0.884518413 |
| 8585 | 1.8945409 | 2.1423268 | MTHFR         | 0.884337973 |
| 8586 | 3.1961452 | 3.6149731 | PARD6G        | 0.884140796 |
| 8587 | 5.5749583 | 6.3055096 | WWC2          | 0.884140796 |
| 8588 | 18.920696 | 21.400985 | PIP4K2A       | 0.884103977 |
| 8589 | 48.992884 | 55.428141 | TRIP10        | 0.883899096 |
| 8590 | 59.049607 | 66.824944 | TEX261        | 0.883646183 |
| 8591 | 141.76195 | 160.50869 | ATP5G1        | 0.883204206 |
| 8592 | 10.788358 | 12.215021 | ELP4          | 0.883204206 |
| 8593 | 32.740658 | 37.074196 | POLRMT        | 0.883111753 |
| 8594 | 5.7751638 | 6.5400415 | FBXO38        | 0.883046969 |
| 8595 | 26.806575 | 30.357622 | PIM3          | 0.883026177 |
| 8596 | 219.24448 | 248.32055 | DAD1          | 0.882909116 |
| 8597 | 6.6988831 | 7.5879969 | RHOQ          | 0.882826284 |
| 8598 | 5.1865247 | 5.8758913 | C6orf120      | 0.882678802 |



|      |           |           |             |             |
|------|-----------|-----------|-------------|-------------|
| 8599 | 6.58698   | 7.462488  | LINC00294   | 0.882678802 |
| 8600 | 6.4406027 | 7.296655  | ZNF7        | 0.882678802 |
| 8601 | 8.5537108 | 9.6930142 | MZT1        | 0.882461394 |
| 8602 | 52.231773 | 59.188735 | INO80E      | 0.882461394 |
| 8603 | 5.6455314 | 6.3983444 | KIAA1467    | 0.882342544 |
| 8604 | 103.68263 | 117.65293 | AUP1        | 0.881258369 |
| 8605 | 33.78234  | 38.334749 | SCAND1      | 0.881245882 |
| 8606 | 15.792399 | 17.920536 | HIF1AN      | 0.881245882 |
| 8607 | 14.413798 | 16.360032 | LUC7L       | 0.881037303 |
| 8608 | 11.087644 | 12.587999 | DLG4        | 0.880810699 |
| 8609 | 6.4963025 | 7.3753673 | VPS36       | 0.880810699 |
| 8610 | 10.25281  | 11.640197 | RBM34       | 0.880810699 |
| 8611 | 68.943353 | 78.277324 | AAMP        | 0.880757657 |
| 8612 | 10.958908 | 12.44639  | SMURF1      | 0.880488883 |
| 8613 | 12.596968 | 14.308671 | RNF166      | 0.880373029 |
| 8614 | 11.0931   | 12.60325  | TAZ         | 0.880177705 |
| 8615 | 43.802861 | 49.769713 | WDR18       | 0.88011077  |
| 8616 | 69.920954 | 79.488964 | GSTO1       | 0.879630961 |
| 8617 | 61.171993 | 69.546183 | CRIM1       | 0.879588063 |
| 8618 | 1.3027364 | 1.4822419 | LINC00641   | 0.878895894 |
| 8619 | 2.3905476 | 2.719944  | RPL23AP7    | 0.878895893 |
| 8620 | 10.112212 | 11.505586 | ANTXR2      | 0.878895892 |
| 8621 | 82.708303 | 94.127378 | UBE2D3      | 0.878684874 |
| 8622 | 37.553471 | 42.778674 | NABP2       | 0.877854959 |
| 8623 | 3.1695741 | 3.6127534 | TUBG2       | 0.877329234 |
| 8624 | 5.0173568 | 5.7188985 | PIGL        | 0.877329234 |
| 8625 | 52.355363 | 59.681275 | MRPS16      | 0.877249404 |
| 8626 | 6.6302587 | 7.5597317 | TMEM184C    | 0.877049473 |
| 8627 | 3.6495647 | 4.1630898 | PIGB        | 0.876648078 |
| 8628 | 95.109985 | 108.49278 | CSTB        | 0.876648078 |
| 8629 | 6.954464  | 7.9349546 | COQ7        | 0.876434    |
| 8630 | 20.461414 | 23.350659 | HADH        | 0.876267092 |
| 8631 | 45.929316 | 52.417206 | SNRNP40     | 0.876225953 |
| 8632 | 50.967677 | 58.221169 | ATP2A2      | 0.875414862 |
| 8633 | 24.598688 | 28.105819 | TRIM25      | 0.875216884 |
| 8634 | 0.4135657 | 0.4726902 | NUTM2D      | 0.87491899  |
| 8635 | 1.1983244 | 1.3696404 | DPY19L1P1   | 0.874918989 |
| 8636 | 1.4601239 | 1.6688675 | ZNF180      | 0.874918989 |
| 8637 | 9.7289952 | 11.119881 | RAP1GDS1    | 0.874918989 |
| 8638 | 1.0782665 | 1.2324186 | SCN5A       | 0.874918989 |
| 8639 | 3.4026212 | 3.88907   | OXR1        | 0.874918989 |
| 8640 | 1.7895351 | 2.0453724 | ARHGAP5-AS1 | 0.874918988 |
| 8641 | 14.541969 | 16.630264 | UBE4B       | 0.874428013 |

|      |           |           |          |             |
|------|-----------|-----------|----------|-------------|
| 8642 | 59.172501 | 67.669951 | HSPE1    | 0.874428013 |
| 8643 | 6.1704628 | 7.0565704 | SGK223   | 0.874428013 |
| 8644 | 6.1566178 | 7.0438618 | HPS4     | 0.874040115 |
| 8645 | 13.213893 | 15.118177 | HYAL2    | 0.874040115 |
| 8646 | 10.693457 | 12.243839 | INPP5K   | 0.873374559 |
| 8647 | 21.719385 | 24.871314 | GTSE1    | 0.873270531 |
| 8648 | 6.1861697 | 7.0848758 | LMTK2    | 0.873151476 |
| 8649 | 2.5422732 | 2.9116061 | MC1R     | 0.873151475 |
| 8650 | 9.2305144 | 10.572129 | TOR1AIP2 | 0.873098895 |
| 8651 | 5.5132143 | 6.3150326 | TAOK1    | 0.873030221 |
| 8652 | 35.766505 | 40.970634 | NELFB    | 0.872979035 |
| 8653 | 36.058476 | 41.311049 | APOBEC3C | 0.872853064 |
| 8654 | 16.941002 | 19.410373 | EFCAB14  | 0.872780868 |
| 8655 | 80.112932 | 91.814345 | GPS2     | 0.872553544 |
| 8656 | 1.8787267 | 2.1534328 | ZNF324B  | 0.872433423 |
| 8657 | 4.8939852 | 5.610741  | EVC      | 0.872252907 |
| 8658 | 10.091417 | 11.575383 | CKLF     | 0.871799848 |
| 8659 | 6.2797023 | 7.2041209 | DIAPH3   | 0.871681973 |
| 8660 | 33.94266  | 38.943489 | TIMM13   | 0.87158755  |
| 8661 | 5.1188886 | 5.8735842 | GMCL1    | 0.871510213 |
| 8662 | 174.25527 | 200.00426 | SEC61A1  | 0.871257781 |
| 8663 | 93.912514 | 107.83452 | HIGD2A   | 0.87089474  |
| 8664 | 9.0800387 | 10.428043 | ZNF263   | 0.870732774 |
| 8665 | 19.348503 | 22.220943 | TMEM97   | 0.870732774 |
| 8666 | 1.8217403 | 2.0921922 | TTC21B   | 0.870732774 |
| 8667 | 6.1136634 | 7.0212855 | PGGT1B   | 0.870732773 |
| 8668 | 3.742303  | 4.2978778 | RAD52    | 0.870732773 |
| 8669 | 6.6231578 | 7.6064184 | HERC4    | 0.870732773 |
| 8670 | 9.1805947 | 10.543527 | DALRD3   | 0.870732773 |
| 8671 | 21.516173 | 24.715728 | CAPZA2   | 0.87054576  |
| 8672 | 3.4079205 | 3.9151019 | MDM4     | 0.870455116 |
| 8673 | 8.6349105 | 9.9238535 | SNX18    | 0.870116689 |
| 8674 | 25.851397 | 29.715727 | FGD5-AS1 | 0.869956719 |
| 8675 | 33.181399 | 38.148374 | TCEAL8   | 0.869798511 |
| 8676 | 73.132278 | 84.089059 | SRRT     | 0.869700284 |
| 8677 | 3.3279161 | 3.8274084 | TMEM68   | 0.869495937 |
| 8678 | 24.441024 | 28.113197 | CCDC94   | 0.869379022 |
| 8679 | 18.004664 | 20.71014  | 7-Mar    | 0.869364653 |
| 8680 | 7.5119427 | 8.6409099 | BCL6     | 0.869346256 |
| 8681 | 50.089406 | 57.664461 | PSMD12   | 0.868635633 |
| 8682 | 2.882997  | 3.3192992 | ADPRM    | 0.868555941 |
| 8683 | 2.2746307 | 2.618865  | ANKRD49  | 0.868555941 |
| 8684 | 1.0104801 | 1.1634025 | LTB4R    | 0.868555941 |

|      |           |           |            |             |
|------|-----------|-----------|------------|-------------|
| 8685 | 28.495507 | 32.809392 | PRR11      | 0.868516775 |
| 8686 | 138.74614 | 159.80155 | MRPL37     | 0.868240217 |
| 8687 | 8.0476637 | 9.2720131 | TGFBRAP1   | 0.867952149 |
| 8688 | 4.5812799 | 5.279083  | METTL14    | 0.867817373 |
| 8689 | 3.4446198 | 3.9720173 | EXO1       | 0.867221754 |
| 8690 | 4.6403543 | 5.3508278 | PFKFB4     | 0.867221754 |
| 8691 | 21.517783 | 24.814011 | REXO1      | 0.867162615 |
| 8692 | 32.317953 | 37.270848 | MARVELD1   | 0.867110757 |
| 8693 | 14.836101 | 17.117303 | UPF3A      | 0.866731244 |
| 8694 | 9.7649499 | 11.267231 | DCAF11     | 0.86666815  |
| 8695 | 4.6266019 | 5.3414235 | LRRC8C     | 0.866173963 |
| 8696 | 11.551556 | 13.337725 | INTS12     | 0.866081423 |
| 8697 | 7.9029918 | 9.1254714 | RAB22A     | 0.866036562 |
| 8698 | 44.515852 | 51.446646 | SMARCE1    | 0.865281902 |
| 8699 | 7.2074057 | 8.330531  | EME1       | 0.865179631 |
| 8700 | 23.720268 | 27.419246 | GMPPA      | 0.865095559 |
| 8701 | 34.103544 | 39.424913 | DNAJC7     | 0.865025226 |
| 8702 | 264.5639  | 305.89531 | CSNK2B     | 0.864883809 |
| 8703 | 3.4286041 | 3.9646393 | SMAD9      | 0.864795959 |
| 8704 | 1.8235452 | 2.1086421 | COG6       | 0.864795959 |
| 8705 | 6.7055991 | 7.756731  | CCDC90B    | 0.864487764 |
| 8706 | 21.487519 | 24.861363 | SLC25A38   | 0.864293672 |
| 8707 | 52.486494 | 60.731755 | THRAP3     | 0.864234768 |
| 8708 | 9.8492953 | 11.402554 | ZAK        | 0.863779748 |
| 8709 | 4.6661509 | 5.4025755 | STK3       | 0.863690082 |
| 8710 | 28.551711 | 33.072436 | BAZ2A      | 0.863308381 |
| 8711 | 17.910358 | 20.751932 | SOLH       | 0.863069437 |
| 8712 | 25.630028 | 29.720787 | RNF115     | 0.862360343 |
| 8713 | 31.984576 | 37.095437 | C21orf33   | 0.862223984 |
| 8714 | 20.278164 | 23.518877 | PUM1       | 0.862207997 |
| 8715 | 28.84346  | 33.467093 | TAP2       | 0.86184539  |
| 8716 | 0.2691804 | 0.3123966 | WDR78      | 0.861662641 |
| 8717 | 0.8170393 | 0.9482126 | LOC441155  | 0.861662641 |
| 8718 | 0.3406891 | 0.3953857 | DOCK2      | 0.861662641 |
| 8719 | 0.210888  | 0.2447454 | ADAMTS13   | 0.861662641 |
| 8720 | 0.34687   | 0.4025589 | DBIL5P     | 0.861662641 |
| 8721 | 0.1714094 | 0.1989286 | KLB        | 0.861662641 |
| 8722 | 0.5045993 | 0.5856112 | AMH        | 0.861662641 |
| 8723 | 9.2367866 | 10.719725 | FAM109B    | 0.861662641 |
| 8724 | 4.1928364 | 4.8659838 | ORC4       | 0.861662641 |
| 8725 | 3.7296166 | 4.3283954 | ZNF343     | 0.86166264  |
| 8726 | 1.0077345 | 1.1695233 | RAB11B-AS1 | 0.86166264  |
| 8727 | 7.8345677 | 9.0923841 | SNORA10    | 0.86166264  |

|      |           |           |              |             |
|------|-----------|-----------|--------------|-------------|
| 8728 | 1.0922406 | 1.2675965 | LOC100270746 | 0.86166264  |
| 8729 | 1.4871515 | 1.7259093 | BSC12        | 0.86166264  |
| 8730 | 29.893371 | 34.692662 | PITPNA       | 0.86166264  |
| 8731 | 9.9913967 | 11.595486 | GPT2         | 0.86166264  |
| 8732 | 7.9072323 | 9.1767148 | CNIH3        | 0.86166264  |
| 8733 | 3.0646985 | 3.5567267 | FBXO30       | 0.86166264  |
| 8734 | 18.924928 | 21.963268 | FAM134A      | 0.86166264  |
| 8735 | 3.2224354 | 3.7397878 | PTPDC1       | 0.86166264  |
| 8736 | 1.5536742 | 1.803112  | LOC100505549 | 0.86166264  |
| 8737 | 10.989427 | 12.753747 | MCAT         | 0.86166264  |
| 8738 | 0.5310895 | 0.6163543 | ASB9         | 0.86166264  |
| 8739 | 1.0430405 | 1.2104976 | HIST2H2BF    | 0.86166264  |
| 8740 | 0.2057251 | 0.2387536 | ARGFX        | 0.861662638 |
| 8741 | 25.733028 | 29.872562 | NUDCD3       | 0.861426891 |
| 8742 | 40.514129 | 47.04639  | KIF2C        | 0.861152781 |
| 8743 | 16.222858 | 18.841192 | EP300        | 0.861031386 |
| 8744 | 17.00896  | 19.755071 | PCGF2        | 0.860992086 |
| 8745 | 18.494552 | 21.483781 | HOXC10       | 0.860861094 |
| 8746 | 12.339695 | 14.335576 | RRP7A        | 0.860774329 |
| 8747 | 0.3086828 | 0.3587857 | ABCB5        | 0.860354432 |
| 8748 | 11.850168 | 13.775259 | SLU7         | 0.860250079 |
| 8749 | 5.1443154 | 5.9808053 | TTC23        | 0.860137574 |
| 8750 | 22.280556 | 25.916668 | SFSWAP       | 0.859699855 |
| 8751 | 5.3856523 | 6.2665795 | CDK14        | 0.859424556 |
| 8752 | 31.101446 | 36.209642 | SNAPIN       | 0.858927204 |
| 8753 | 2.8117099 | 3.2738555 | MKLN1        | 0.858837517 |
| 8754 | 4.7884675 | 5.5768094 | BTRC         | 0.858639263 |
| 8755 | 16.894339 | 19.679756 | ITPRIPL2     | 0.858462832 |
| 8756 | 11.64243  | 13.562768 | SLC2A3       | 0.858411084 |
| 8757 | 4.9272316 | 5.7399441 | IL15RA       | 0.858411083 |
| 8758 | 32.465321 | 37.822604 | ZNF787       | 0.858357633 |
| 8759 | 6.3683197 | 7.4198317 | SPATA2       | 0.858283571 |
| 8760 | 1.6314643 | 1.9011508 | STARD9       | 0.85814565  |
| 8761 | 14.645587 | 17.066552 | GTF2H4       | 0.85814565  |
| 8762 | 39.486975 | 46.020554 | CNOT3        | 0.858029123 |
| 8763 | 6.4249648 | 7.488339  | COQ3         | 0.857995991 |
| 8764 | 7.5255375 | 8.7710637 | C11orf74     | 0.857995991 |
| 8765 | 137.80955 | 160.62259 | ALYREF       | 0.857971188 |
| 8766 | 6.7047878 | 7.8167521 | USP20        | 0.857745992 |
| 8767 | 16.985876 | 19.806482 | NFATC2IP     | 0.857591793 |
| 8768 | 5.1795197 | 6.0405422 | GEMIN2       | 0.857459408 |
| 8769 | 29.447755 | 34.357175 | LSM14A       | 0.857106415 |
| 8770 | 27.813969 | 32.458087 | CLINT1       | 0.856919543 |

|      |           |           |          |             |
|------|-----------|-----------|----------|-------------|
| 8771 | 14.36384  | 16.765715 | FOXC2    | 0.856738854 |
| 8772 | 13.401642 | 15.645267 | DYM      | 0.856594037 |
| 8773 | 29.211554 | 34.108097 | ISOC2    | 0.856440443 |
| 8774 | 29.52486  | 34.487488 | SMAGP    | 0.856103526 |
| 8775 | 97.578007 | 114.04309 | PUF60    | 0.855624034 |
| 8776 | 52.460178 | 61.328529 | RPL26L1  | 0.855396003 |
| 8777 | 7.0376847 | 8.2285159 | C6orf136 | 0.855279954 |
| 8778 | 10.560785 | 12.35356  | NRN1     | 0.854877895 |
| 8779 | 14.70561  | 17.202    | DNAJC19  | 0.854877895 |
| 8780 | 8.7916996 | 10.285978 | GIGYF1   | 0.854726656 |
| 8781 | 53.356592 | 62.436773 | DIAPH1   | 0.854569978 |
| 8782 | 47.969074 | 56.13474  | GNG12    | 0.854534531 |
| 8783 | 12.983473 | 15.196351 | UIMC1    | 0.854380985 |
| 8784 | 1.7037825 | 1.9946646 | PLEKHH2  | 0.854169922 |
| 8785 | 11.503749 | 13.467753 | RABEPK   | 0.854169921 |
| 8786 | 10.328216 | 12.093696 | CPNE3    | 0.854016487 |
| 8787 | 8.6775367 | 10.161851 | TANC1    | 0.853932686 |
| 8788 | 4.3707699 | 5.1184929 | SAMD8    | 0.853917358 |
| 8789 | 25.697795 | 30.102596 | RFTN1    | 0.853673715 |
| 8790 | 88.656911 | 103.87466 | KHDRBS1  | 0.853498932 |
| 8791 | 8.6809939 | 10.171574 | POLR3E   | 0.85345633  |
| 8792 | 2.3000614 | 2.6962923 | C1orf115 | 0.853046014 |
| 8793 | 2.3970664 | 2.8100083 | FOXO1    | 0.853046014 |
| 8794 | 4.6757973 | 5.482061  | SOCS7    | 0.85292689  |
| 8795 | 21.936789 | 25.721523 | CCDC43   | 0.852857329 |
| 8796 | 11.773743 | 13.811968 | RBL2     | 0.85243054  |
| 8797 | 42.769359 | 50.17832  | RNF10    | 0.852347369 |
| 8798 | 16.365114 | 19.206809 | CTNNA1   | 0.85204752  |
| 8799 | 245.40958 | 288.03142 | PSMD2    | 0.852023634 |
| 8800 | 9.6602829 | 11.3382   | MED9     | 0.852012019 |
| 8801 | 11.083064 | 13.008997 | DPH1     | 0.851953766 |
| 8802 | 47.066728 | 55.254632 | USP39    | 0.851815067 |
| 8803 | 44.373382 | 52.098532 | MRPS18A  | 0.851720379 |
| 8804 | 2.4374211 | 2.8624172 | NUDT6    | 0.851525433 |
| 8805 | 2.8450444 | 3.341115  | IRF7     | 0.851525433 |
| 8806 | 24.783186 | 29.111389 | B3GNT1   | 0.851322689 |
| 8807 | 10.588294 | 12.438477 | PDPK1    | 0.851253293 |
| 8808 | 173.66625 | 204.02774 | NUTF2    | 0.851189392 |
| 8809 | 115.80137 | 136.09674 | SNRNP70  | 0.850875413 |
| 8810 | 60.112914 | 70.652873 | DNAJB11  | 0.850820528 |
| 8811 | 10.502378 | 12.344767 | CDK5RAP2 | 0.850755518 |
| 8812 | 25.461924 | 29.932491 | 11-Sep   | 0.850645    |
| 8813 | 2.5853502 | 3.0396416 | ZBTB6    | 0.850544413 |

|      |           |           |           |             |
|------|-----------|-----------|-----------|-------------|
| 8814 | 9.4273987 | 11.085533 | TMEM39A   | 0.850423563 |
| 8815 | 5.6932397 | 6.6965598 | KDM5A     | 0.850173805 |
| 8816 | 10.672305 | 12.561736 | METTL2A   | 0.849588387 |
| 8817 | 31.190551 | 36.713376 | H2AFV     | 0.84956913  |
| 8818 | 4.3452296 | 5.1147259 | DIP2A     | 0.849552787 |
| 8819 | 99.67967  | 117.3395  | NHP2L1    | 0.849497991 |
| 8820 | 3.059482  | 3.6021317 | BMF       | 0.849353174 |
| 8821 | 2.1767432 | 2.5628246 | LOC400027 | 0.849353174 |
| 8822 | 5.0441342 | 5.9387948 | PTPRN     | 0.849353174 |
| 8823 | 60.605977 | 71.364391 | TMEM147   | 0.849246752 |
| 8824 | 6.6830765 | 7.871213  | CLCN3     | 0.849052943 |
| 8825 | 4.4599115 | 5.2543602 | UPRT      | 0.848802004 |
| 8826 | 72.712598 | 85.704926 | MCM5      | 0.848406292 |
| 8827 | 290.72835 | 342.845   | RHOC      | 0.847987729 |
| 8828 | 3.4501835 | 4.0692075 | MGC45800  | 0.847876038 |
| 8829 | 9.317753  | 10.989523 | FAM168A   | 0.847876038 |
| 8830 | 139.33762 | 164.35232 | KHSRP     | 0.847798294 |
| 8831 | 20.51792  | 24.203538 | NFKBIB    | 0.84772398  |
| 8832 | 5.8208577 | 6.8667314 | TPMT      | 0.847689733 |
| 8833 | 60.426708 | 71.293713 | PHC2      | 0.847574142 |
| 8834 | 2.7464352 | 3.2404899 | KIRREL3   | 0.847537023 |
| 8835 | 1.8065144 | 2.1314873 | SLC24A1   | 0.847537023 |
| 8836 | 3.1385467 | 3.7031382 | FBXO44    | 0.847537023 |
| 8837 | 8.7104928 | 10.279645 | WHSC1L1   | 0.847353441 |
| 8838 | 47.479595 | 56.048301 | ICMT      | 0.847119268 |
| 8839 | 6.1481845 | 7.2588114 | DDX28     | 0.846996042 |
| 8840 | 10.816148 | 12.77159  | LYRM1     | 0.846891281 |
| 8841 | 10.16844  | 12.007987 | MICU2     | 0.846806389 |
| 8842 | 4.7004008 | 5.5511986 | WDR37     | 0.846736201 |
| 8843 | 43.741874 | 51.693828 | NDUFS2    | 0.846172076 |
| 8844 | 5.245373  | 6.2002334 | CYP27B1   | 0.845996047 |
| 8845 | 11.542126 | 13.643239 | ASCC1     | 0.845996047 |
| 8846 | 2.1231554 | 2.5096517 | ZNF304    | 0.845996047 |
| 8847 | 5.0545403 | 5.9746619 | USP38     | 0.845996047 |
| 8848 | 4.0436842 | 4.7797908 | LUC7L2    | 0.845996047 |
| 8849 | 2.787746  | 3.2952234 | TYW1      | 0.845996047 |
| 8850 | 1.8209665 | 2.1524527 | SCYL3     | 0.845996047 |
| 8851 | 1.1527938 | 1.3626468 | CABP1     | 0.845996047 |
| 8852 | 0.7478451 | 0.8839818 | WDR31     | 0.845996046 |
| 8853 | 0.2448878 | 0.2894668 | DNM3      | 0.845996045 |
| 8854 | 120.62147 | 142.7473  | CCDC124   | 0.845000025 |
| 8855 | 7.2987843 | 8.6377649 | GCDH      | 0.844985299 |
| 8856 | 8.4954871 | 10.060625 | OARD1     | 0.844429388 |

|      |           |           |            |             |
|------|-----------|-----------|------------|-------------|
| 8857 | 17.205687 | 20.37552  | C11orf73   | 0.844429388 |
| 8858 | 2.8918181 | 3.4249961 | MAP3K13    | 0.844327416 |
| 8859 | 5.8539185 | 6.9352841 | DLX5       | 0.844077689 |
| 8860 | 3.68197   | 4.3621221 | STARD4     | 0.844077689 |
| 8861 | 3.4234994 | 4.0570714 | PIGM       | 0.843835137 |
| 8862 | 6.4323819 | 7.6241121 | HAUS5      | 0.843689309 |
| 8863 | 10.316807 | 12.230626 | MED13L     | 0.843522375 |
| 8864 | 13.743507 | 16.29767  | EML4       | 0.843280504 |
| 8865 | 2.577379  | 3.0564529 | TRIM2      | 0.843258195 |
| 8866 | 3.7774191 | 4.4803728 | ARMCX5     | 0.843103753 |
| 8867 | 92.142771 | 109.30605 | TMED2      | 0.842979582 |
| 8868 | 8.2813402 | 9.8255608 | SGSM2      | 0.842836398 |
| 8869 | 1.6229342 | 1.926298  | RFXAP      | 0.842514582 |
| 8870 | 8.0718116 | 9.5806195 | NOL12      | 0.842514582 |
| 8871 | 1.4522613 | 1.7237225 | TRMT13     | 0.842514582 |
| 8872 | 4.0041825 | 4.7526567 | ENDOG      | 0.842514582 |
| 8873 | 5.4429628 | 6.4603782 | FAM86DP    | 0.842514582 |
| 8874 | 217.08281 | 257.68069 | COX7B      | 0.842448894 |
| 8875 | 26.812571 | 31.831517 | DDR1       | 0.842327772 |
| 8876 | 9.9940675 | 11.867751 | ZRANB1     | 0.842119776 |
| 8877 | 21.154366 | 25.123366 | SETD5      | 0.842019567 |
| 8878 | 4.9931784 | 5.9303696 | UFSP2      | 0.841967494 |
| 8879 | 5.0462071 | 5.9933514 | WBP4       | 0.841967494 |
| 8880 | 9.6054756 | 11.408369 | KBTBD2     | 0.841967494 |
| 8881 | 4.3123936 | 5.1238958 | SPATA13    | 0.841623974 |
| 8882 | 9.9018547 | 11.766237 | EFR3A      | 0.841548118 |
| 8883 | 11.458946 | 13.618625 | OCRL       | 0.841417272 |
| 8884 | 20.948738 | 24.900102 | CREB3L2    | 0.841311345 |
| 8885 | 3.6454723 | 4.3335725 | SLC30A7    | 0.841216408 |
| 8886 | 75.971724 | 90.325791 | RN7SL2     | 0.841085622 |
| 8887 | 16.998942 | 20.211018 | DCBLD2     | 0.841072993 |
| 8888 | 4.458916  | 5.3020304 | FAM63A     | 0.840982737 |
| 8889 | 19.826591 | 23.577831 | GOLIM4     | 0.840899685 |
| 8890 | 23.493413 | 27.941694 | TCTN3      | 0.840801334 |
| 8891 | 20.428442 | 24.305135 | MED27      | 0.840498997 |
| 8892 | 27.331082 | 32.522346 | PPP3R1     | 0.840378543 |
| 8893 | 15.155057 | 18.033939 | SMG6       | 0.840363115 |
| 8894 | 3.1056861 | 3.6967125 | ZHX1       | 0.840121075 |
| 8895 | 1.6529552 | 1.9675202 | TMEM38A    | 0.840121075 |
| 8896 | 5.2402195 | 6.2374576 | ACN9       | 0.840121074 |
| 8897 | 3.5321949 | 4.2043879 | TRIM3      | 0.840121074 |
| 8898 | 1.2612633 | 1.5012875 | ZNF674-AS1 | 0.840121074 |
| 8899 | 33.387948 | 39.741829 | ASCC2      | 0.840121074 |

|      |           |           |           |             |
|------|-----------|-----------|-----------|-------------|
| 8900 | 3.5670751 | 4.2459059 | DHRS4-AS1 | 0.840121074 |
| 8901 | 0.7618654 | 0.906852  | ZNF169    | 0.840121074 |
| 8902 | 8.2497882 | 9.8243411 | PKN3      | 0.83972941  |
| 8903 | 226.46079 | 269.69021 | PSMA7     | 0.839707108 |
| 8904 | 26.007349 | 30.973566 | C9orf78   | 0.839662743 |
| 8905 | 42.97289  | 51.183836 | DDX23     | 0.83957931  |
| 8906 | 11.317059 | 13.481015 | INSIG1    | 0.839481226 |
| 8907 | 41.639926 | 49.61376  | CD164     | 0.839281793 |
| 8908 | 14.820644 | 17.659896 | USP4      | 0.839225996 |
| 8909 | 4.3807703 | 5.2202708 | ZNF35     | 0.839184485 |
| 8910 | 13.035481 | 15.534963 | PRMT7     | 0.839106027 |
| 8911 | 23.053493 | 27.474829 | NT5E      | 0.839076869 |
| 8912 | 5.8761826 | 7.0046137 | C6orf203  | 0.838901741 |
| 8913 | 4.3228068 | 5.1529358 | HYLS1     | 0.83890174  |
| 8914 | 21.23502  | 25.312881 | SURF2     | 0.83890174  |
| 8915 | 5.7992422 | 6.9135437 | OSBPL8    | 0.83882339  |
| 8916 | 8.9253355 | 10.641434 | UNC119B   | 0.838734279 |
| 8917 | 66.190261 | 78.940811 | RIC8A     | 0.838479619 |
| 8918 | 18.096463 | 21.583478 | NCAPG2    | 0.838440527 |
| 8919 | 13.431418 | 16.031748 | ARNT      | 0.837801213 |
| 8920 | 27.969777 | 33.386898 | MAPK1     | 0.837747106 |
| 8921 | 25.401929 | 30.33245  | PTRH2     | 0.837450633 |
| 8922 | 11.629315 | 13.887106 | ZC3H7A    | 0.83741814  |
| 8923 | 152.0151  | 181.54776 | APP       | 0.837328406 |
| 8924 | 0.9374944 | 1.1200066 | SGK494    | 0.837043708 |
| 8925 | 0.8788865 | 1.0499888 | ZNF484    | 0.837043708 |
| 8926 | 5.0975417 | 6.089935  | EFCAB11   | 0.837043708 |
| 8927 | 570.06956 | 681.14468 | ALDOA     | 0.836928751 |
| 8928 | 10.841592 | 12.960808 | TMEM167B  | 0.836490473 |
| 8929 | 4.9454793 | 5.9133843 | HLCS      | 0.836319622 |
| 8930 | 69.4665   | 83.082979 | TTC1      | 0.836109886 |
| 8931 | 220.06084 | 263.39466 | NDUFS6    | 0.835479521 |
| 8932 | 4.7897029 | 5.7329573 | SMAD4     | 0.835468096 |
| 8933 | 10.077186 | 12.062515 | CHN1      | 0.835413315 |
| 8934 | 19.60036  | 23.464391 | SRP19     | 0.835323608 |
| 8935 | 1.0104801 | 1.2099386 | CCDC18    | 0.835149944 |
| 8936 | 7.3183771 | 8.7629499 | ACOT2     | 0.835149944 |
| 8937 | 41.00279  | 49.113645 | BOLA3     | 0.834855358 |
| 8938 | 6.0088978 | 7.1981374 | USP16     | 0.83478509  |
| 8939 | 5.146615  | 6.1660418 | TOMM40L   | 0.834670799 |
| 8940 | 65.075444 | 77.969205 | MRPL14    | 0.834630087 |
| 8941 | 7.4428393 | 8.9180463 | RAD17     | 0.834581815 |
| 8942 | 9.6442425 | 11.557573 | C16orf91  | 0.834452242 |



|      |           |           |              |             |
|------|-----------|-----------|--------------|-------------|
| 8943 | 4.3328258 | 5.1924191 | ELMOD2       | 0.834452241 |
| 8944 | 4.8436117 | 5.8054108 | KIAA0922     | 0.834327136 |
| 8945 | 2.8101335 | 3.3700018 | DNAJC22      | 0.833867072 |
| 8946 | 5.2467145 | 6.2920275 | SLC30A6      | 0.833867071 |
| 8947 | 8.8907637 | 10.662087 | SMIM3        | 0.833867071 |
| 8948 | 143.43285 | 172.17245 | YBX3         | 0.833076676 |
| 8949 | 2.7346541 | 3.2831324 | ZNF8         | 0.832940552 |
| 8950 | 1.6585032 | 1.9911423 | PIGA         | 0.832940552 |
| 8951 | 11.984322 | 14.392882 | MESDC2       | 0.832656175 |
| 8952 | 829.03707 | 995.86352 | RPL23        | 0.832480608 |
| 8953 | 16.935084 | 20.348798 | MORC2        | 0.832240014 |
| 8954 | 16.553719 | 19.89749  | LUC7L3       | 0.831950135 |
| 8955 | 30.693984 | 36.896778 | GJA1         | 0.83188791  |
| 8956 | 3.6090304 | 4.3416854 | CSPP1        | 0.831251018 |
| 8957 | 22.821337 | 27.460466 | ATXN2        | 0.831061537 |
| 8958 | 71.320588 | 85.831171 | PSMD7        | 0.830940407 |
| 8959 | 33.671988 | 40.530462 | RNF40        | 0.830782245 |
| 8960 | 14.828081 | 17.849895 | EXOC2        | 0.830709711 |
| 8961 | 1.8502583 | 2.2276533 | TTC33        | 0.830586283 |
| 8962 | 4.5617402 | 5.4953522 | 8-Mar        | 0.830108797 |
| 8963 | 16.968996 | 20.445111 | AP5B1        | 0.829978185 |
| 8964 | 7.2270856 | 8.7099639 | USP40        | 0.829749209 |
| 8965 | 47.82125  | 57.647488 | PPP1R18      | 0.829546124 |
| 8966 | 2.4841874 | 2.9949141 | MEX3A        | 0.829468652 |
| 8967 | 20.685163 | 24.938314 | WAC          | 0.82945315  |
| 8968 | 6.6669862 | 8.0416287 | PANX1        | 0.829059189 |
| 8969 | 12.96708  | 15.641491 | AGK          | 0.829018153 |
| 8970 | 14.854163 | 17.921686 | MAPK8        | 0.828837397 |
| 8971 | 8.1299148 | 9.8088176 | ORC3         | 0.828837397 |
| 8972 | 46.456217 | 56.074886 | PITRM1       | 0.82846744  |
| 8973 | 3.8291668 | 4.6234807 | HDAC4        | 0.828200014 |
| 8974 | 16.279064 | 19.663205 | ATAD1        | 0.82789478  |
| 8975 | 15.383585 | 18.582426 | NME2         | 0.827856659 |
| 8976 | 0.2118958 | 0.2561615 | NLRP8        | 0.827196137 |
| 8977 | 0.1494439 | 0.1806632 | CXXC4        | 0.827196137 |
| 8978 | 0.1883837 | 0.2277377 | ARHGAP30     | 0.827196136 |
| 8979 | 0.2993171 | 0.3618453 | LOC100507173 | 0.827196135 |
| 8980 | 10.391322 | 12.562102 | SP100        | 0.827196135 |
| 8981 | 0.7920171 | 0.957472  | METTL25      | 0.827196135 |
| 8982 | 0.3677097 | 0.4445255 | TRAF3IP3     | 0.827196135 |
| 8983 | 4.3416563 | 5.2486419 | SAYSD1       | 0.827196135 |
| 8984 | 1.530661  | 1.8504209 | THEMIS2      | 0.827196135 |
| 8985 | 4.184929  | 5.0591738 | ZCCHC8       | 0.827196135 |

|      |           |           |              |             |
|------|-----------|-----------|--------------|-------------|
| 8986 | 25.632738 | 30.987497 | SNAPC2       | 0.827196135 |
| 8987 | 0.7318683 | 0.8847579 | REP15        | 0.827196135 |
| 8988 | 7.69111   | 9.297807  | EID2         | 0.827196135 |
| 8989 | 9.1103607 | 11.013544 | GEMIN7       | 0.827196135 |
| 8990 | 2.8094299 | 3.3963287 | AMDHD2       | 0.827196135 |
| 8991 | 0.3334392 | 0.4030957 | WDR11-AS1    | 0.827196135 |
| 8992 | 0.7697119 | 0.9305071 | LOC100289388 | 0.827196135 |
| 8993 | 2.5022238 | 3.0249462 | RRP7B        | 0.827196135 |
| 8994 | 0.3898962 | 0.4713467 | CDKL3        | 0.827196135 |
| 8995 | 0.3775353 | 0.4564036 | KLRAP1       | 0.827196135 |
| 8996 | 3.0039568 | 3.6314927 | GPNMB        | 0.827196135 |
| 8997 | 1.9031918 | 2.3007745 | HIST1H2BC    | 0.827196135 |
| 8998 | 9.6545943 | 11.671469 | SMARCAL1     | 0.827196135 |
| 8999 | 1.2831165 | 1.5511635 | ZNF792       | 0.827196134 |
| 9000 | 0.2851858 | 0.344762  | GMCL1P1      | 0.827196134 |
| 9001 | 0.4779805 | 0.5778321 | GAD1         | 0.827196134 |
| 9002 | 0.6102474 | 0.73773   | FBXO48       | 0.827196134 |
| 9003 | 0.2535274 | 0.30649   | ERV3-1       | 0.827196134 |
| 9004 | 0.3602411 | 0.4354966 | UCA1         | 0.827196134 |
| 9005 | 13.972496 | 16.905072 | TRIM41       | 0.826526882 |
| 9006 | 31.603596 | 38.239952 | PITPNB       | 0.82645492  |
| 9007 | 9.2079516 | 11.141876 | ATMIN        | 0.826427365 |
| 9008 | 9.1042623 | 11.020373 | SMAD5        | 0.826130161 |
| 9009 | 12.006901 | 14.535481 | SCCPDH       | 0.826040833 |
| 9010 | 16.110375 | 19.505922 | KCTD20       | 0.825922219 |
| 9011 | 4.0153349 | 4.8628972 | DAGLA        | 0.825708372 |
| 9012 | 18.01706  | 21.82806  | SLC27A4      | 0.825408247 |
| 9013 | 9.7490436 | 11.812134 | PARP12       | 0.825341435 |
| 9014 | 101.75757 | 123.34308 | HNRNPH1      | 0.824996145 |
| 9015 | 9.9427242 | 12.051843 | HMMR         | 0.824996145 |
| 9016 | 91.465382 | 110.87481 | SRSF2        | 0.824942876 |
| 9017 | 4.6195331 | 5.6002992 | RBM18        | 0.82487255  |
| 9018 | 4.0494411 | 4.9095716 | EGLN1        | 0.824805395 |
| 9019 | 22.39669  | 27.157475 | SMPD4        | 0.824697053 |
| 9020 | 11.965831 | 14.512446 | PNISR        | 0.82452201  |
| 9021 | 14.921809 | 18.100171 | NSDHL        | 0.824401553 |
| 9022 | 125.2925  | 152.03951 | SSU72        | 0.824078562 |
| 9023 | 18.309301 | 22.218761 | GAMT         | 0.824046911 |
| 9024 | 7.0618962 | 8.5727199 | PCGF3        | 0.823763786 |
| 9025 | 1.5198742 | 1.8459267 | DAAM1        | 0.823366523 |
| 9026 | 1.6886725 | 2.0519103 | TTC14        | 0.822975746 |
| 9027 | 7.2418704 | 8.8020426 | FYCO1        | 0.822748844 |
| 9028 | 4.9160226 | 5.9751195 | KLHL2        | 0.822748844 |

|      |           |           |          |             |
|------|-----------|-----------|----------|-------------|
| 9029 | 8.3455177 | 10.146574 | DLEU1    | 0.822496157 |
| 9030 | 6.7788753 | 8.2442439 | HBS1L    | 0.822255543 |
| 9031 | 40.959729 | 49.818642 | RAD23B   | 0.822176741 |
| 9032 | 27.434871 | 33.370201 | RPF1     | 0.822136831 |
| 9033 | 2.7632098 | 3.3620043 | FOXQ1    | 0.821893595 |
| 9034 | 8.4525671 | 10.288806 | LCMT2    | 0.821530408 |
| 9035 | 15.649665 | 19.055037 | CCDC71   | 0.821287591 |
| 9036 | 62.560874 | 76.175564 | SSBP1    | 0.821272204 |
| 9037 | 1266.7371 | 1542.6069 | TPT1     | 0.821166533 |
| 9038 | 9.0462806 | 11.017085 | C12orf45 | 0.82111381  |
| 9039 | 3.6969688 | 4.5023829 | ZSCAN32  | 0.82111381  |
| 9040 | 2.5947828 | 3.1600769 | GRAMD4   | 0.82111381  |
| 9041 | 3.9449487 | 4.8057459 | COL4A3BP | 0.82088166  |
| 9042 | 5.9484396 | 7.247488  | ANKS6    | 0.820758811 |
| 9043 | 17.614013 | 21.464531 | ZNFX1    | 0.820610179 |
| 9044 | 4.949617  | 6.0334709 | RCBTB1   | 0.820359803 |
| 9045 | 1.2693825 | 1.5479045 | PIPSL    | 0.820065134 |
| 9046 | 6.3374022 | 7.7279254 | RAD51AP1 | 0.820065134 |
| 9047 | 1.5537078 | 1.8946151 | ELOVL4   | 0.820065134 |
| 9048 | 2.4669009 | 3.0081768 | SMA4     | 0.820065134 |
| 9049 | 10.687154 | 13.033731 | PURA     | 0.819961184 |
| 9050 | 13.456861 | 16.414601 | QPCT     | 0.819810455 |
| 9051 | 4.8137767 | 5.8731071 | ZNF212   | 0.819630316 |
| 9052 | 95.010673 | 115.93126 | GPI      | 0.819543141 |
| 9053 | 5.587258  | 6.8175794 | RC3H2    | 0.819536911 |
| 9054 | 2.6709731 | 3.2596997 | SYNE3    | 0.819392397 |
| 9055 | 0.9976293 | 1.2187323 | C7orf60  | 0.818579509 |
| 9056 | 4.9598211 | 6.0590585 | PPM1D    | 0.818579508 |
| 9057 | 15.339818 | 18.739558 | UTP6     | 0.818579508 |
| 9058 | 7.2046545 | 8.8038887 | MPHOSPH8 | 0.818349117 |
| 9059 | 46.54053  | 56.879976 | RFC2     | 0.81822345  |
| 9060 | 119.04663 | 145.51369 | PPM1G    | 0.818112904 |
| 9061 | 2.2072321 | 2.6979779 | TAB3     | 0.818106067 |
| 9062 | 12.681845 | 15.503681 | SPATS2   | 0.817989328 |
| 9063 | 6.4553907 | 7.8922886 | PRPF18   | 0.817936477 |
| 9064 | 0.1282853 | 0.1568466 | TCF21    | 0.817903227 |
| 9065 | 864.62069 | 1057.1555 | RPL30    | 0.817874642 |
| 9066 | 100.68169 | 123.11746 | SLC1A5   | 0.817769398 |
| 9067 | 13.233069 | 16.183277 | FAM203A  | 0.817700261 |
| 9068 | 11.279354 | 13.794369 | RASSF3   | 0.817678188 |
| 9069 | 3.235426  | 3.9573322 | ODF2L    | 0.817577575 |
| 9070 | 4.7519666 | 5.8138802 | MAP3K12  | 0.817348562 |
| 9071 | 74.059327 | 90.671184 | YKT6     | 0.816790113 |

|      |           |           |           |             |
|------|-----------|-----------|-----------|-------------|
| 9072 | 16.660853 | 20.409909 | GPSM3     | 0.816311975 |
| 9073 | 15.097574 | 18.494858 | MICAL2    | 0.816311975 |
| 9074 | 12.649249 | 15.503681 | MON1B     | 0.815886813 |
| 9075 | 78.538618 | 96.261658 | LSM7      | 0.815886813 |
| 9076 | 38.497795 | 47.192696 | CHTF8     | 0.815757469 |
| 9077 | 11.501255 | 14.099733 | E4F1      | 0.815707299 |
| 9078 | 4.0791234 | 5.0017117 | GSPT2     | 0.815545485 |
| 9079 | 260.98268 | 320.08341 | XRCC6     | 0.81535834  |
| 9080 | 6.9899639 | 8.5801922 | CSNK1G3   | 0.81466286  |
| 9081 | 25.884014 | 31.77267  | MRPL54    | 0.81466286  |
| 9082 | 858.02289 | 1053.84   | RPS13     | 0.814187085 |
| 9083 | 51.81061  | 63.659777 | NDUFA9    | 0.813867291 |
| 9084 | 15.607193 | 19.177874 | DLG1      | 0.813812481 |
| 9085 | 29.237483 | 35.929943 | EXOSC4    | 0.813735843 |
| 9086 | 1.6666405 | 2.048387  | ZNF557    | 0.813635543 |
| 9087 | 3.7948316 | 4.6640435 | RTN4IP1   | 0.813635542 |
| 9088 | 148.51715 | 182.57864 | TGFBI     | 0.813442087 |
| 9089 | 57.92574  | 71.217865 | ADSL      | 0.813359671 |
| 9090 | 71.840355 | 88.328223 | SMTN      | 0.813334093 |
| 9091 | 1.4602568 | 1.7955714 | TRPS1     | 0.813254627 |
| 9092 | 36.776382 | 45.227513 | PTPLAD1   | 0.813141831 |
| 9093 | 76.383715 | 93.941793 | SNHG6     | 0.813096201 |
| 9094 | 6.5157423 | 8.0155347 | NCOA3     | 0.812889283 |
| 9095 | 31.857248 | 39.203574 | PHF23     | 0.812610812 |
| 9096 | 3.0578851 | 3.7638993 | ADCK1     | 0.812424775 |
| 9097 | 2.7865411 | 3.4299066 | KBTD4     | 0.812424775 |
| 9098 | 7.1851658 | 8.8440999 | NEDD4     | 0.812424775 |
| 9099 | 3.6015625 | 4.4331027 | HS3ST3A1  | 0.812424775 |
| 9100 | 3.2701776 | 4.0252066 | C6orf52   | 0.812424775 |
| 9101 | 1.3801291 | 1.6987778 | SH3BP5    | 0.812424775 |
| 9102 | 18.006291 | 22.166794 | ITGA6     | 0.812309193 |
| 9103 | 10.407966 | 12.81451  | PHC1      | 0.812201643 |
| 9104 | 7.8306223 | 9.6421302 | LTBP4     | 0.81212576  |
| 9105 | 3.17112   | 3.9056612 | DOPEY2    | 0.811929092 |
| 9106 | 3.2592735 | 4.0151964 | FNBP1L    | 0.811734525 |
| 9107 | 5.5476337 | 6.8342956 | ZNF24     | 0.811734525 |
| 9108 | 14.530242 | 17.902531 | PINX1     | 0.811630616 |
| 9109 | 9.4758951 | 11.676063 | VIPAS39   | 0.811565975 |
| 9110 | 80.769826 | 99.547335 | IDH3B     | 0.811371047 |
| 9111 | 1.4684132 | 1.8099765 | LRRC37A4P | 0.811288517 |
| 9112 | 15.690513 | 19.350223 | RASSF1    | 0.810869895 |
| 9113 | 3.1792097 | 3.9213377 | COX18     | 0.810746212 |
| 9114 | 5.7403455 | 7.0803236 | ATF1      | 0.810746212 |

|      |           |           |           |             |
|------|-----------|-----------|-----------|-------------|
| 9115 | 21.464163 | 26.477647 | THAP11    | 0.810652212 |
| 9116 | 39.828417 | 49.137698 | MRPL34    | 0.81054706  |
| 9117 | 2.0818414 | 2.5688151 | KIAA1586  | 0.810428646 |
| 9118 | 15.226572 | 18.792084 | TMEM39B   | 0.81026522  |
| 9119 | 120.4767  | 148.72387 | PDIA3     | 0.810069731 |
| 9120 | 25.968349 | 32.058282 | DHX38     | 0.810035596 |
| 9121 | 32.539571 | 40.191705 | ZNF622    | 0.80960912  |
| 9122 | 14.562267 | 17.989003 | ORC6      | 0.809509375 |
| 9123 | 12.228998 | 15.116089 | PJA1      | 0.809005479 |
| 9124 | 3.1702926 | 3.9188731 | AKAP11    | 0.808980676 |
| 9125 | 3.8421311 | 4.7495334 | NT5DC3    | 0.808949161 |
| 9126 | 3.8382355 | 4.7449605 | PPIP5K2   | 0.808907785 |
| 9127 | 2.2292404 | 2.7560579 | ADRBK2    | 0.808851059 |
| 9128 | 4.6577768 | 5.7585099 | MKL2      | 0.808851059 |
| 9129 | 15.306887 | 18.929238 | GLRX      | 0.808637247 |
| 9130 | 4.1696919 | 5.1573425 | ATP11B    | 0.808496222 |
| 9131 | 10.001315 | 12.371799 | EMC9      | 0.808396223 |
| 9132 | 38.906238 | 48.139486 | DNAJA3    | 0.808198031 |
| 9133 | 8.8211429 | 10.91781  | NABP1     | 0.807959015 |
| 9134 | 1.5657363 | 1.9382513 | ATP7B     | 0.807808726 |
| 9135 | 1.0759991 | 1.3319973 | PTPRN2    | 0.807808726 |
| 9136 | 3.6080246 | 4.4664343 | SOCS2     | 0.807808725 |
| 9137 | 5.3600694 | 6.6353201 | KLHDC4    | 0.807808725 |
| 9138 | 6.0370655 | 7.4733848 | TSPAN15   | 0.807808725 |
| 9139 | 3.7787761 | 4.6778104 | CCP110    | 0.807808725 |
| 9140 | 18.396033 | 22.776196 | SNTA1     | 0.807686792 |
| 9141 | 24.115795 | 29.861437 | VPS52     | 0.807589906 |
| 9142 | 11.132674 | 13.78535  | SQRDL     | 0.807572869 |
| 9143 | 91.159257 | 112.90523 | SF3A2     | 0.807396228 |
| 9144 | 8.1028455 | 10.036148 | HERPUD2   | 0.807366091 |
| 9145 | 2.8182139 | 3.490627  | POT1      | 0.80736609  |
| 9146 | 33.635991 | 41.675603 | RPA2      | 0.807090673 |
| 9147 | 1.7489599 | 2.1671812 | ANKRD32   | 0.80702062  |
| 9148 | 51.43477  | 63.752014 | PFDN6     | 0.806794436 |
| 9149 | 14.02499  | 17.384696 | TMEM246   | 0.806743483 |
| 9150 | 3.6372577 | 4.5085679 | GPD1L     | 0.806743483 |
| 9151 | 5.4677805 | 6.7785946 | RBFA      | 0.806624503 |
| 9152 | 41.6799   | 51.696453 | POLR2I    | 0.806242929 |
| 9153 | 3.334392  | 4.1361123 | FAM173B   | 0.806165725 |
| 9154 | 6.0046207 | 7.4483702 | NT5DC1    | 0.806165725 |
| 9155 | 2.4633511 | 3.0559957 | LOC388692 | 0.806071502 |
| 9156 | 21.165574 | 26.26014  | CCNY      | 0.805996234 |
| 9157 | 14.165444 | 17.580182 | GGA2      | 0.80576207  |

|      |           |           |            |             |
|------|-----------|-----------|------------|-------------|
| 9158 | 4.4110203 | 5.4760634 | CCDC88A    | 0.805509345 |
| 9159 | 33.866888 | 42.046263 | CNOT7      | 0.805467251 |
| 9160 | 12.624935 | 15.674051 | AKAP8      | 0.805467251 |
| 9161 | 20.244523 | 25.145493 | C8orf59    | 0.805095475 |
| 9162 | 20.455241 | 25.409004 | ESRRA      | 0.805039096 |
| 9163 | 83.116058 | 103.24907 | LAMTOR5    | 0.805005371 |
| 9164 | 27.042716 | 33.618354 | KIAA0100   | 0.804403321 |
| 9165 | 0.2452171 | 0.3049135 | RGS5       | 0.804218465 |
| 9166 | 0.9002138 | 1.1193648 | GCA        | 0.804218465 |
| 9167 | 0.6165666 | 0.7666655 | PIN4P1     | 0.804218465 |
| 9168 | 1.349488  | 1.6780117 | CMTM1      | 0.804218464 |
| 9169 | 13.974311 | 17.376262 | CPSF3      | 0.804218464 |
| 9170 | 1.4587965 | 1.8139306 | GCSHP3     | 0.804218464 |
| 9171 | 3.4044259 | 4.2332103 | CENPI      | 0.804218464 |
| 9172 | 4.0310619 | 5.0123966 | TROVE2     | 0.804218464 |
| 9173 | 2.6143306 | 3.2507717 | ZEB1-AS1   | 0.804218464 |
| 9174 | 1.2779645 | 1.5890763 | SLC29A3    | 0.804218464 |
| 9175 | 1.5765092 | 1.9602997 | ZNF620     | 0.804218464 |
| 9176 | 1.3716939 | 1.7056235 | ELL3       | 0.804218464 |
| 9177 | 0.7384442 | 0.9182134 | FBXL19-AS1 | 0.804218464 |
| 9178 | 0.8777356 | 1.0914143 | SWSAP1     | 0.804218464 |
| 9179 | 0.2866568 | 0.3564415 | XK         | 0.804218464 |
| 9180 | 0.3339736 | 0.4152772 | FAM110B    | 0.804218464 |
| 9181 | 154.91469 | 192.68229 | WDR1       | 0.803990285 |
| 9182 | 14.803072 | 18.417432 | PCIF1      | 0.803753329 |
| 9183 | 46.338013 | 57.652277 | DPP9       | 0.803749915 |
| 9184 | 4.8298957 | 6.0115037 | NOTCH2NL   | 0.803442192 |
| 9185 | 20.481749 | 25.493271 | TOX4       | 0.803417849 |
| 9186 | 4.4302988 | 5.5148853 | REV1       | 0.803334708 |
| 9187 | 8.4219918 | 10.484647 | PPP1R16A   | 0.803268974 |
| 9188 | 14.806918 | 18.433325 | THYN1      | 0.803268974 |
| 9189 | 23.24456  | 28.940204 | GTF2E2     | 0.803192675 |
| 9190 | 5.3239534 | 6.6292282 | PHF20L1    | 0.803103043 |
| 9191 | 4.4049214 | 5.4864906 | SCAMP1     | 0.802866837 |
| 9192 | 6.9431434 | 8.6479389 | SHOC2      | 0.802866837 |
| 9193 | 12.229728 | 15.232573 | PLRG1      | 0.802866836 |
| 9194 | 12.793967 | 15.947851 | TAF12      | 0.802237631 |
| 9195 | 19.4567   | 24.256305 | ZMYND19    | 0.802129585 |
| 9196 | 12.364992 | 15.417521 | OBSL1      | 0.802009073 |
| 9197 | 65.258727 | 81.388631 | TP53       | 0.801816253 |
| 9198 | 23.214911 | 28.958767 | IRF2BP2    | 0.801653992 |
| 9199 | 12.866895 | 16.053534 | LUZP1      | 0.801499214 |
| 9200 | 12.14358  | 15.153973 | HDDC3      | 0.801346256 |

|      |           |           |          |             |
|------|-----------|-----------|----------|-------------|
| 9201 | 53.480004 | 66.737698 | PDCD5    | 0.801346256 |
| 9202 | 647.8354  | 808.44836 | RPL18    | 0.801331822 |
| 9203 | 37.907794 | 47.316788 | MRPS12   | 0.801148928 |
| 9204 | 16.6659   | 20.80683  | ERCC3    | 0.800982173 |
| 9205 | 14.399463 | 17.977258 | CWC15    | 0.800982173 |
| 9206 | 6.9006457 | 8.6152301 | MBIP     | 0.800982173 |
| 9207 | 3.4072451 | 4.2538339 | TRAPPC6B | 0.800982173 |
| 9208 | 12.670775 | 15.821868 | HMG20A   | 0.800839395 |
| 9209 | 10.529874 | 13.149798 | ELL      | 0.800763176 |
| 9210 | 3.3748907 | 4.2159131 | C1orf63  | 0.800512388 |
| 9211 | 2.1793412 | 2.7224328 | CCDC111  | 0.800512388 |
| 9212 | 1.5489588 | 1.9349592 | MAB21L3  | 0.800512388 |
| 9213 | 0.9878704 | 1.2340477 | ZNF805   | 0.800512388 |
| 9214 | 5.2180152 | 6.521579  | CRBN     | 0.800115309 |
| 9215 | 19.744378 | 24.684081 | REEP4    | 0.799883055 |
| 9216 | 1.4044016 | 1.7557587 | PRKX     | 0.799883055 |
| 9217 | 13.735175 | 17.181718 | PTPN14   | 0.799406387 |
| 9218 | 12.227522 | 15.296042 | PGP      | 0.799391223 |
| 9219 | 14.64889  | 18.32647  | ZMYND8   | 0.799329598 |
| 9220 | 1.614028  | 2.0200695 | PEX1     | 0.798996267 |
| 9221 | 2.1661825 | 2.7111297 | ZNF23    | 0.798996267 |
| 9222 | 2.1504046 | 2.6913825 | ANKRD46  | 0.798996266 |
| 9223 | 1.6103598 | 2.0154785 | C4orf29  | 0.798996266 |
| 9224 | 1.1952738 | 1.4959692 | ZNF530   | 0.798996266 |
| 9225 | 35.842077 | 44.865699 | NIPA2    | 0.79887482  |
| 9226 | 6.7145915 | 8.4061269 | ATG7     | 0.798773519 |
| 9227 | 5.0000495 | 6.2615603 | POC1B    | 0.798530922 |
| 9228 | 4.9079592 | 6.1462357 | RNF139   | 0.798530922 |
| 9229 | 101.84938 | 127.54594 | SARS     | 0.798530922 |
| 9230 | 12.941297 | 16.208226 | EXOC4    | 0.798440056 |
| 9231 | 7.1861897 | 9.0076077 | TNKS     | 0.797791144 |
| 9232 | 6.0189733 | 7.5501195 | FBXO22   | 0.797202382 |
| 9233 | 4.2742691 | 5.3626922 | NDUFAF6  | 0.797037942 |
| 9234 | 13.960377 | 17.515323 | SIRT6    | 0.797037942 |
| 9235 | 2.9611296 | 3.7151677 | BRMS1L   | 0.797037942 |
| 9236 | 51.718999 | 64.907868 | BRD4     | 0.796806313 |
| 9237 | 5.5348144 | 6.9473076 | GFOD2    | 0.796684802 |
| 9238 | 7.4242322 | 9.3215879 | NKAP     | 0.796455738 |
| 9239 | 6.2609292 | 7.8637475 | TXNL4B   | 0.79617628  |
| 9240 | 8.5309737 | 10.714931 | TTC5     | 0.796176279 |
| 9241 | 12.853523 | 16.145051 | PPP1R8   | 0.796127736 |
| 9242 | 5.8656605 | 7.3681355 | ARFIP1   | 0.796084776 |
| 9243 | 239.43772 | 300.8693  | PHB2     | 0.79581973  |

|      |           |           |          |             |
|------|-----------|-----------|----------|-------------|
| 9244 | 0.455319  | 0.572454  | ZNF765   | 0.7953809   |
| 9245 | 1.7751235 | 2.2317905 | PET117   | 0.795380899 |
| 9246 | 1.0809103 | 1.3589844 | TSTD3    | 0.795380899 |
| 9247 | 2.1810518 | 2.7421476 | CACNA2D1 | 0.795380899 |
| 9248 | 7.441276  | 9.3556132 | POP1     | 0.795380899 |
| 9249 | 7.3863114 | 9.2865084 | TRABD2A  | 0.795380899 |
| 9250 | 1.5334768 | 1.9279779 | IDI2     | 0.795380898 |
| 9251 | 83.209331 | 104.63025 | SNRPD3   | 0.795270276 |
| 9252 | 46.805353 | 58.863675 | REXO2    | 0.795148331 |
| 9253 | 4.9243434 | 6.194289  | TGFBR1   | 0.79498121  |
| 9254 | 76.374442 | 96.152059 | ZNF207   | 0.794308957 |
| 9255 | 6.8562202 | 8.6343575 | STAU2    | 0.794062588 |
| 9256 | 11.609444 | 14.620909 | SEC23IP  | 0.794030252 |
| 9257 | 10.934934 | 13.772641 | DUSP11   | 0.793960576 |
| 9258 | 2.5045217 | 3.154466  | TRIM39   | 0.793960576 |
| 9259 | 11.809305 | 14.876151 | CNPPD1   | 0.793841452 |
| 9260 | 3.7379193 | 4.7117191 | STARD8   | 0.793323879 |
| 9261 | 57.022807 | 71.885578 | FKBP4    | 0.793244055 |
| 9262 | 6.2522083 | 7.882242  | ANKRD33B | 0.793201773 |
| 9263 | 10.634964 | 13.410277 | ZNF592   | 0.793045836 |
| 9264 | 18.952036 | 23.898118 | MKRN2    | 0.793034642 |
| 9265 | 20.95772  | 26.429534 | AFAP1    | 0.792965932 |
| 9266 | 1.1087644 | 1.3986665 | ZNF550   | 0.79272963  |
| 9267 | 1.4766446 | 1.8627343 | BCL2     | 0.792729629 |
| 9268 | 20.926145 | 26.397581 | DYNC1LI2 | 0.792729629 |
| 9269 | 5.7518262 | 7.2557225 | LARP7    | 0.792729629 |
| 9270 | 5.652914  | 7.1338471 | PAQR7    | 0.792407512 |
| 9271 | 5.6479424 | 7.128702  | POLR3F   | 0.792282012 |
| 9272 | 18.773268 | 23.702278 | POGK     | 0.792044864 |
| 9273 | 3.2143882 | 4.0585899 | ANGEL2   | 0.791996299 |
| 9274 | 5.4541026 | 6.8912518 | PLK3     | 0.791453092 |
| 9275 | 167.72358 | 211.9715  | UBA52    | 0.791255312 |
| 9276 | 8.4047461 | 10.622366 | SUCLA2   | 0.791231086 |
| 9277 | 15.407251 | 19.473307 | IPO9     | 0.791198479 |
| 9278 | 10.428186 | 13.182405 | DONSON   | 0.791068593 |
| 9279 | 7.5781636 | 9.5800665 | PPM1B    | 0.791034555 |
| 9280 | 59.90431  | 75.73344  | SRRM1    | 0.790988897 |
| 9281 | 24.031876 | 30.393082 | TIMM22   | 0.790702188 |
| 9282 | 0.6989663 | 0.8839818 | ZNF841   | 0.790702188 |
| 9283 | 2.3712853 | 2.9989614 | ZNF586   | 0.790702188 |
| 9284 | 33.110201 | 41.880593 | UBTF     | 0.790585779 |
| 9285 | 51.958299 | 65.722124 | ERP29    | 0.790575473 |
| 9286 | 42.000136 | 53.126678 | SNRPB2   | 0.790565813 |



|      |           |           |          |             |
|------|-----------|-----------|----------|-------------|
| 9287 | 11.397916 | 14.418321 | ST5      | 0.790516184 |
| 9288 | 36.7355   | 46.474111 | CASC3    | 0.790450852 |
| 9289 | 6.8391512 | 8.6577384 | CREBL2   | 0.789946619 |
| 9290 | 9.0513076 | 11.45942  | FAM111A  | 0.78985742  |
| 9291 | 6.2736576 | 7.9427723 | RAB28    | 0.78985742  |
| 9292 | 3.8022498 | 4.8154351 | ZNF707   | 0.78959631  |
| 9293 | 37.79371  | 47.865769 | ADD1     | 0.789576989 |
| 9294 | 10.383132 | 13.151467 | GFM2     | 0.7895037   |
| 9295 | 9.8312962 | 12.45325  | VANGL1   | 0.789456274 |
| 9296 | 5.8024959 | 7.3505685 | HTRA2    | 0.789394161 |
| 9297 | 57.849351 | 73.290126 | RNH1     | 0.789319841 |
| 9298 | 1.1705569 | 1.4834046 | ZNF331   | 0.789101576 |
| 9299 | 5.3768554 | 6.8138952 | PCGF6    | 0.789101576 |
| 9300 | 3.6806245 | 4.6643229 | SLC7A6OS | 0.789101576 |
| 9301 | 1.4499965 | 1.8375284 | EDNRA    | 0.789101576 |
| 9302 | 24.051842 | 30.485015 | PSMG3    | 0.788972617 |
| 9303 | 48.401627 | 61.367931 | TMEM106C | 0.788712061 |
| 9304 | 65.225146 | 82.703352 | TMX2     | 0.788663875 |
| 9305 | 3.1433421 | 3.9875284 | ARHGAP12 | 0.788293346 |
| 9306 | 1.2028831 | 1.5268776 | AGAP6    | 0.787805843 |
| 9307 | 1.2076755 | 1.5329608 | LOC90246 | 0.787805843 |
| 9308 | 1.1732555 | 1.4892698 | PRMT10   | 0.787805842 |
| 9309 | 7.9005519 | 10.028552 | KAT6A    | 0.787805842 |
| 9310 | 107.47794 | 136.4411  | CTDNEP1  | 0.78772412  |
| 9311 | 11.088104 | 14.078103 | TOLLIP   | 0.787613507 |
| 9312 | 8.7745064 | 11.141513 | MED13    | 0.787550724 |
| 9313 | 12.498868 | 15.870557 | ACTR10   | 0.787550724 |
| 9314 | 14.997493 | 19.046198 | CSTF2T   | 0.78742709  |
| 9315 | 8.8931406 | 11.294969 | MUTYH    | 0.787354119 |
| 9316 | 9.2376887 | 11.734178 | NCKIPSD  | 0.787246322 |
| 9317 | 3.5870316 | 4.5574437 | MYRF     | 0.787070949 |
| 9318 | 6.4807162 | 8.2339669 | HOXC9    | 0.787070949 |
| 9319 | 19.399172 | 24.649983 | ZFAND5   | 0.786985211 |
| 9320 | 26.03102  | 33.079022 | HOXB7    | 0.786934376 |
| 9321 | 20.543647 | 26.108884 | ZMPSTE24 | 0.786845104 |
| 9322 | 7.2153706 | 9.1749715 | DENND6A  | 0.786418861 |
| 9323 | 10.698427 | 13.606606 | TUT1     | 0.786267159 |
| 9324 | 1.8331438 | 2.3327297 | ATG16L2  | 0.785836328 |
| 9325 | 3.327387  | 4.2341985 | ATPBD4   | 0.785836328 |
| 9326 | 5.1503519 | 6.5539753 | ISY1     | 0.785836328 |
| 9327 | 5.8151065 | 7.4024251 | ALG13    | 0.785567758 |
| 9328 | 2.5510297 | 3.2473706 | ZNF451   | 0.785567758 |
| 9329 | 36.508391 | 46.501881 | ITPK1    | 0.785094923 |

|      |           |           |           |             |
|------|-----------|-----------|-----------|-------------|
| 9330 | 2.7544744 | 3.5085699 | C10orf88  | 0.785070406 |
| 9331 | 7.5214608 | 9.5806195 | C18orf21  | 0.785070406 |
| 9332 | 42.990074 | 54.77561  | SUMO1     | 0.784839706 |
| 9333 | 11.525021 | 14.686636 | IMPA2     | 0.784728476 |
| 9334 | 12.028036 | 15.332436 | GNB4      | 0.784483042 |
| 9335 | 1.9762022 | 2.5193481 | ZNF426    | 0.784410128 |
| 9336 | 2.8637033 | 3.650773  | AUH       | 0.784410128 |
| 9337 | 15.585138 | 19.874672 | PAK1IP1   | 0.784170832 |
| 9338 | 3.5195029 | 4.4901065 | LOC648987 | 0.783835047 |
| 9339 | 2.5865823 | 3.3006457 | FNIP2     | 0.783659496 |
| 9340 | 6.5608938 | 8.3721231 | MED4      | 0.783659496 |
| 9341 | 2.3217413 | 2.9639389 | TRIM52    | 0.783329673 |
| 9342 | 1145.5072 | 1462.4978 | ENO1      | 0.783253976 |
| 9343 | 22.441347 | 28.657091 | C7orf26   | 0.783099282 |
| 9344 | 5.233471  | 6.6836537 | PIGX      | 0.783025467 |
| 9345 | 3.9125659 | 4.9976441 | MIER1     | 0.782882056 |
| 9346 | 4.8478919 | 6.1934577 | NFYB      | 0.782744006 |
| 9347 | 5.8386892 | 7.4617474 | PKNOX1    | 0.78248283  |
| 9348 | 391.21199 | 500.01666 | ATP5B     | 0.782397907 |
| 9349 | 41.918633 | 53.578589 | CARM1     | 0.782376572 |
| 9350 | 6.8109529 | 8.7069881 | CAPN10    | 0.782239823 |
| 9351 | 9.1986047 | 11.762724 | SLC30A5   | 0.782013153 |
| 9352 | 82.11542  | 105.0059  | HADHA     | 0.782007681 |
| 9353 | 25.216177 | 32.253949 | CFDP1     | 0.781801225 |
| 9354 | 6.966626  | 8.910994  | C3orf38   | 0.781801225 |
| 9355 | 10.693302 | 13.680767 | GATC      | 0.781630246 |
| 9356 | 7.521359  | 9.6241615 | STK11IP   | 0.781507976 |
| 9357 | 35.817076 | 45.842063 | ETV5      | 0.781314677 |
| 9358 | 3.497614  | 4.478841  | ALG9      | 0.780919428 |
| 9359 | 199.44983 | 255.42348 | UCHL1     | 0.780859422 |
| 9360 | 16.354776 | 20.945638 | IVNS1ABP  | 0.78082015  |
| 9361 | 2.3274318 | 2.9809371 | ASPHD2    | 0.780771862 |
| 9362 | 2.0090624 | 2.5731747 | FAR2      | 0.780771862 |
| 9363 | 17.229158 | 22.069223 | DCAF15    | 0.780687115 |
| 9364 | 4.4325735 | 5.6789603 | ARHGAP29  | 0.780525536 |
| 9365 | 31.866914 | 40.847683 | POLR3K    | 0.780140067 |
| 9366 | 4.4376835 | 5.6907627 | XPR1      | 0.77980469  |
| 9367 | 21.712673 | 27.848914 | RAB11A    | 0.779659607 |
| 9368 | 11.626856 | 14.927035 | HIRIP3    | 0.77891266  |
| 9369 | 28.658605 | 36.813041 | RNF26     | 0.778490571 |
| 9370 | 55.737677 | 71.630076 | RCC2      | 0.778132326 |
| 9371 | 4.9452701 | 6.3581537 | EXOC1     | 0.777783976 |
| 9372 | 36.46482  | 46.889919 | LSMD1     | 0.777668635 |

|      |           |           |                 |             |
|------|-----------|-----------|-----------------|-------------|
| 9373 | 108.8553  | 139.98652 | SNRPC           | 0.777612741 |
| 9374 | 23.356561 | 30.042588 | PDLIM5          | 0.777448363 |
| 9375 | 30.36334  | 39.056271 | VPS37B          | 0.777425472 |
| 9376 | 13.242052 | 17.058086 | RECQL4          | 0.776291757 |
| 9377 | 54.85312  | 70.664642 | TUBG1           | 0.776245648 |
| 9378 | 84.552402 | 108.98075 | TIMM23          | 0.775847121 |
| 9379 | 0.1472788 | 0.1899155 | ZNF492          | 0.77549638  |
| 9380 | 0.2459475 | 0.3171485 | SMIM17          | 0.775496379 |
| 9381 | 0.1768095 | 0.2279953 | VWCE            | 0.775496378 |
| 9382 | 0.1497661 | 0.1931229 | ANKHD1-EIF4EBP3 | 0.775496378 |
| 9383 | 0.201417  | 0.2597266 | DMGDH           | 0.775496378 |
| 9384 | 0.359723  | 0.4638616 | USP44           | 0.775496378 |
| 9385 | 0.3237693 | 0.4174994 | PRRT1           | 0.775496378 |
| 9386 | 0.2763919 | 0.3564064 | CCNB3           | 0.775496377 |
| 9387 | 0.3524231 | 0.4544484 | TRPC3           | 0.775496377 |
| 9388 | 0.1032192 | 0.1331008 | ZDHHC15         | 0.775496377 |
| 9389 | 0.574631  | 0.7409847 | LOC642799       | 0.775496377 |
| 9390 | 0.8880661 | 1.1451582 | HOXC-AS5        | 0.775496377 |
| 9391 | 0.5025711 | 0.6480638 | CCR10           | 0.775496377 |
| 9392 | 0.6962121 | 0.8977632 | LOC100132356    | 0.775496377 |
| 9393 | 0.4007683 | 0.5167894 | LTB4R2          | 0.775496377 |
| 9394 | 0.3593095 | 0.4633284 | LOC400752       | 0.775496377 |
| 9395 | 20.051597 | 25.856467 | ARHGDIB         | 0.775496377 |
| 9396 | 1.4365774 | 1.8524618 | ZFP69           | 0.775496377 |
| 9397 | 0.9325753 | 1.2025528 | TMOD1           | 0.775496377 |
| 9398 | 0.2431733 | 0.3135711 | RGL3            | 0.775496377 |
| 9399 | 0.1911922 | 0.2465417 | SP140           | 0.775496377 |
| 9400 | 0.5607161 | 0.7230416 | GDPD3           | 0.775496377 |
| 9401 | 0.8269821 | 1.0663907 | ZNF124          | 0.775496377 |
| 9402 | 0.8051494 | 1.0382375 | CCDC74B         | 0.775496377 |
| 9403 | 0.6156558 | 0.7938862 | LOC100507117    | 0.775496376 |
| 9404 | 16.142599 | 20.815828 | PDCD7           | 0.775496376 |
| 9405 | 0.8132135 | 1.048636  | LRTOMT          | 0.775496376 |
| 9406 | 12.734402 | 16.420969 | DNAJC17         | 0.775496376 |
| 9407 | 2.6683675 | 3.440851  | DET1            | 0.775496376 |
| 9408 | 0.9180595 | 1.1838346 | C17orf67        | 0.775496376 |
| 9409 | 0.1333615 | 0.1719692 | C17orf104       | 0.775496376 |
| 9410 | 0.5699166 | 0.7349056 | ZNF665          | 0.775496376 |
| 9411 | 1.4150098 | 1.8246504 | FRAT1           | 0.775496376 |
| 9412 | 4.6311    | 5.9717881 | SNORA70         | 0.775496376 |
| 9413 | 5.2845127 | 6.8143615 | FAIM            | 0.775496376 |
| 9414 | 0.763679  | 0.9847615 | ASB3            | 0.775496376 |
| 9415 | 3.086406  | 3.9799103 | DGKQ            | 0.775496376 |

|      |           |           |              |             |
|------|-----------|-----------|--------------|-------------|
| 9416 | 13.371881 | 17.242996 | MED20        | 0.775496376 |
| 9417 | 4.8758982 | 6.2874545 | BACH1        | 0.775496376 |
| 9418 | 0.9866362 | 1.2722642 | C8orf44      | 0.775496376 |
| 9419 | 0.9753487 | 1.2577089 | GNB3         | 0.775496376 |
| 9420 | 6.5260804 | 8.415359  | FITM2        | 0.775496376 |
| 9421 | 1.1672862 | 1.5052117 | ZNF17        | 0.775496376 |
| 9422 | 9.2456688 | 11.922259 | NCK1         | 0.775496376 |
| 9423 | 1.7093602 | 2.2042143 | SCN1B        | 0.775496376 |
| 9424 | 4.0823119 | 5.2641276 | AFTPH        | 0.775496376 |
| 9425 | 8.1676764 | 10.532192 | NSRP1        | 0.775496376 |
| 9426 | 0.4986429 | 0.6429984 | ANKRD36      | 0.775496376 |
| 9427 | 0.8528148 | 1.0997018 | KLHL24       | 0.775496376 |
| 9428 | 0.2210744 | 0.2850747 | CCDC102B     | 0.775496376 |
| 9429 | 1.265584  | 1.6319664 | LOC400927    | 0.775496376 |
| 9430 | 2.3808016 | 3.0700358 | C15orf61     | 0.775496376 |
| 9431 | 1.0265985 | 1.3237954 | CBWD2        | 0.775496376 |
| 9432 | 0.5805    | 0.7485528 | PRORS1P      | 0.775496376 |
| 9433 | 0.448171  | 0.577915  | MTRNR2L6     | 0.775496376 |
| 9434 | 0.3677638 | 0.4742302 | WWTR1-AS1    | 0.775496376 |
| 9435 | 17.846627 | 23.013166 | DYNC1I2      | 0.775496376 |
| 9436 | 1.1818497 | 1.5239913 | FAM212A      | 0.775496376 |
| 9437 | 0.3807543 | 0.4909814 | PRDM7        | 0.775496376 |
| 9438 | 0.3909445 | 0.5041217 | ICA1L        | 0.775496376 |
| 9439 | 0.3591031 | 0.4630623 | LOC100130691 | 0.775496376 |
| 9440 | 0.4543594 | 0.5858949 | ZFP37        | 0.775496375 |
| 9441 | 0.1104786 | 0.1424618 | PDE6A        | 0.775496375 |
| 9442 | 0.3605528 | 0.4649316 | AP4B1-AS1    | 0.775496375 |
| 9443 | 0.10527   | 0.1357453 | NPAS3        | 0.775496375 |
| 9444 | 0.1152227 | 0.1485793 | RGAG1        | 0.775496375 |
| 9445 | 0.1583984 | 0.2042542 | CECR1        | 0.775496375 |
| 9446 | 0.2577075 | 0.332313  | ZNF221       | 0.775496375 |
| 9447 | 0.2726553 | 0.351588  | TNFSF13      | 0.775496375 |
| 9448 | 0.12484   | 0.1609807 | CELF5        | 0.775496373 |
| 9449 | 60.068552 | 77.483445 | CSNK1A1      | 0.775243689 |
| 9450 | 42.214673 | 54.461802 | TIMM50       | 0.775124436 |
| 9451 | 20.404045 | 26.325898 | CPSF1        | 0.775056004 |
| 9452 | 14.703718 | 18.974803 | CENPN        | 0.774907541 |
| 9453 | 14.551469 | 18.779155 | ADD3         | 0.774873488 |
| 9454 | 19.424892 | 25.069069 | BCAR3        | 0.77485494  |
| 9455 | 11.797279 | 15.231013 | CNOT2        | 0.774556381 |
| 9456 | 13.05482  | 16.859808 | UFM1         | 0.774316017 |
| 9457 | 12.280819 | 15.860215 | RHOBTB3      | 0.774316016 |
| 9458 | 4.8748421 | 6.2964317 | STX3         | 0.774222983 |

|      |           |           |          |             |
|------|-----------|-----------|----------|-------------|
| 9459 | 7.4698061 | 9.6496769 | KLHL5    | 0.774099086 |
| 9460 | 12.575004 | 16.246372 | LONP2    | 0.774019241 |
| 9461 | 10.039179 | 12.973387 | TOE1     | 0.773828642 |
| 9462 | 6.9256631 | 8.9509165 | CRY1     | 0.773737881 |
| 9463 | 74.525473 | 96.319424 | HNRNPR   | 0.773732548 |
| 9464 | 24.83298  | 32.113017 | SV2A     | 0.773299503 |
| 9465 | 18.135316 | 23.46398  | PDCD6IP  | 0.772900262 |
| 9466 | 18.897522 | 24.453199 | PPP3CB   | 0.772803681 |
| 9467 | 2.6107528 | 3.3789341 | MAML2    | 0.77265573  |
| 9468 | 36.635477 | 47.423023 | TSPAN4   | 0.772525126 |
| 9469 | 54.18387  | 70.151654 | SRPR     | 0.772381933 |
| 9470 | 3.2248077 | 4.177454  | ADARB1   | 0.771955297 |
| 9471 | 13.44092  | 17.416157 | COQ4     | 0.771750017 |
| 9472 | 40.196907 | 52.085399 | WRNIP1   | 0.771750017 |
| 9473 | 11.486587 | 14.889709 | NCEH1    | 0.771444671 |
| 9474 | 1.7562877 | 2.2775949 | SPAST    | 0.771115041 |
| 9475 | 29.010514 | 37.631152 | RACGAP1  | 0.770917493 |
| 9476 | 13.0648   | 16.949743 | FAM58A   | 0.770796398 |
| 9477 | 20.422981 | 26.499962 | TM9SF1   | 0.770679629 |
| 9478 | 9.2648061 | 12.02255  | SYF2     | 0.770619041 |
| 9479 | 3.77325   | 4.896783  | UBA6     | 0.770556909 |
| 9480 | 1.5350225 | 1.9924288 | ZMYM6    | 0.770427772 |
| 9481 | 18.772017 | 24.368261 | TGIF1    | 0.770346998 |
| 9482 | 11.685953 | 15.173644 | PRTFDC1  | 0.770148125 |
| 9483 | 15.598222 | 20.260032 | SRP54    | 0.769901165 |
| 9484 | 7.5045343 | 9.7501065 | CAMSAP2  | 0.769687415 |
| 9485 | 8.4156395 | 10.934778 | PHTF1    | 0.769621404 |
| 9486 | 15.225534 | 19.786661 | SDF2L1   | 0.769484777 |
| 9487 | 5.3392986 | 6.938797  | OIP5     | 0.769484776 |
| 9488 | 9.2291207 | 11.996896 | PLTP     | 0.769292406 |
| 9489 | 62.751405 | 81.570893 | SRSF3    | 0.769286728 |
| 9490 | 2.2942374 | 2.9826608 | WDR90    | 0.769191528 |
| 9491 | 21.80925  | 28.357313 | SS18     | 0.769087315 |
| 9492 | 17.004492 | 22.109963 | SNRNP25  | 0.769087315 |
| 9493 | 17.790201 | 23.140235 | RGL2     | 0.768799516 |
| 9494 | 5.3244157 | 6.9260429 | C22orf29 | 0.76875293  |
| 9495 | 51.871867 | 67.476632 | MAF1     | 0.768738238 |
| 9496 | 24.310834 | 31.632012 | SCAF4    | 0.768551633 |
| 9497 | 2.614501  | 3.4020394 | ZFP90    | 0.768509923 |
| 9498 | 37.201894 | 48.415902 | SPG21    | 0.768381731 |
| 9499 | 15.317931 | 19.935313 | ZNF22    | 0.76838173  |
| 9500 | 32.42549  | 42.208086 | NAA20    | 0.768229342 |
| 9501 | 4.9505592 | 6.4451116 | THAP1    | 0.768110697 |

|      |           |           |              |             |
|------|-----------|-----------|--------------|-------------|
| 9502 | 3.9926275 | 5.1989552 | MTF1         | 0.767967285 |
| 9503 | 60.125039 | 78.352342 | DTYMK        | 0.767367484 |
| 9504 | 1.7192211 | 2.241027  | LOC100009676 | 0.767157706 |
| 9505 | 0.6823044 | 0.8893926 | ZNF84        | 0.767157705 |
| 9506 | 28.522011 | 37.195525 | PMPCA        | 0.766812954 |
| 9507 | 2.4469609 | 3.1912041 | HECA         | 0.766782934 |
| 9508 | 8.0804134 | 10.540825 | METRN        | 0.766582625 |
| 9509 | 1.8275066 | 2.3839656 | PLEKHM3      | 0.766582625 |
| 9510 | 17.513622 | 22.847776 | BTBD1        | 0.766535085 |
| 9511 | 7.7293027 | 10.084444 | TMEM129      | 0.766457957 |
| 9512 | 43.401561 | 56.630925 | MLEC         | 0.766393289 |
| 9513 | 8.2990951 | 10.829056 | RAD54L       | 0.76637289  |
| 9514 | 8.025693  | 10.47414  | CDK13        | 0.766238844 |
| 9515 | 5.2434333 | 6.8448637 | UHRF1BP1     | 0.766039103 |
| 9516 | 0.6080219 | 0.7938427 | CUX2         | 0.765922347 |
| 9517 | 9.2648227 | 12.099149 | ERBB2IP      | 0.765741705 |
| 9518 | 201.54747 | 263.27128 | HNRNPL       | 0.76555054  |
| 9519 | 7.7014708 | 10.060717 | MASTL        | 0.765499185 |
| 9520 | 4.1830641 | 5.4669398 | LYRM2        | 0.765156425 |
| 9521 | 28.090279 | 36.711812 | ZNF511       | 0.765156425 |
| 9522 | 37.671796 | 49.248423 | MRPL10       | 0.76493406  |
| 9523 | 41.284499 | 53.98603  | TMEM230      | 0.764725593 |
| 9524 | 5.0326992 | 6.5818315 | FBXL5        | 0.764635083 |
| 9525 | 15.943131 | 20.852309 | FAM98A       | 0.764573892 |
| 9526 | 2.4520982 | 3.2084721 | ZFYVE16      | 0.764257298 |
| 9527 | 0.4089095 | 0.5350416 | ZNF780B      | 0.764257298 |
| 9528 | 7.9494712 | 10.405463 | ITGA4        | 0.763970952 |
| 9529 | 5.8756908 | 7.6975882 | HELZ2        | 0.763315805 |
| 9530 | 39.576966 | 51.855463 | GORASP2      | 0.763216896 |
| 9531 | 5.1703758 | 6.7747176 | METTL6       | 0.76318691  |
| 9532 | 3.0323326 | 3.9732502 | WHAMM        | 0.76318691  |
| 9533 | 3.14527   | 4.1212315 | DCLRE1C      | 0.76318691  |
| 9534 | 121.65702 | 159.47105 | BAG6         | 0.762878362 |
| 9535 | 7.6023887 | 9.9674847 | KDM2B        | 0.762718869 |
| 9536 | 62.133463 | 81.487048 | AARS         | 0.762494958 |
| 9537 | 19.94425  | 26.160795 | MTHFD1L      | 0.762371714 |
| 9538 | 37.76845  | 49.544627 | DAXX         | 0.762311739 |
| 9539 | 36.414634 | 47.78074  | FXR2         | 0.762119516 |
| 9540 | 18.8069   | 24.681208 | SART3        | 0.761992708 |
| 9541 | 0.4874028 | 0.6397275 | ANKRD36B     | 0.761891177 |
| 9542 | 13.851326 | 18.18019  | CDC16        | 0.761891177 |
| 9543 | 0.8227843 | 1.0799236 | NR4A2        | 0.761891177 |
| 9544 | 11.639334 | 15.276898 | TPRKB        | 0.761891177 |

|      |           |           |           |             |
|------|-----------|-----------|-----------|-------------|
| 9545 | 1.5054659 | 1.9759593 | RAB33B    | 0.761891177 |
| 9546 | 4.5468982 | 5.9679103 | FAM206A   | 0.761891177 |
| 9547 | 2.8395066 | 3.7269188 | C1orf56   | 0.761891177 |
| 9548 | 5.2854946 | 6.9373353 | ZNF692    | 0.761891177 |
| 9549 | 2.7524462 | 3.6126501 | LRRC1     | 0.761891177 |
| 9550 | 3.85925   | 5.0653559 | ZNF251    | 0.761891177 |
| 9551 | 0.9200861 | 1.2076345 | TYW1B     | 0.761891177 |
| 9552 | 1313.1362 | 1723.5523 | RPL35     | 0.761877779 |
| 9553 | 107.35037 | 140.93945 | TOMM40    | 0.761677258 |
| 9554 | 32.849756 | 43.130064 | PPP6R3    | 0.761644034 |
| 9555 | 15.668444 | 20.574722 | IL6ST     | 0.761538559 |
| 9556 | 4.4985123 | 5.9076738 | VTI1A     | 0.76146931  |
| 9557 | 93.028612 | 122.19537 | CLPTM1L   | 0.761310467 |
| 9558 | 6.1919142 | 8.1334164 | SOCS5     | 0.761293146 |
| 9559 | 9.2224349 | 12.11417  | AKIP1     | 0.761293146 |
| 9560 | 16.533767 | 21.718004 | SMYD2     | 0.761293146 |
| 9561 | 12.719822 | 16.712815 | MRPL42    | 0.761081946 |
| 9562 | 35.831922 | 47.088849 | CDC42SE1  | 0.760942825 |
| 9563 | 18.622934 | 24.482021 | SMYD5     | 0.760677974 |
| 9564 | 15.366657 | 20.204879 | ARL16     | 0.760541901 |
| 9565 | 1323.865  | 1741.0205 | RPL37A    | 0.76039602  |
| 9566 | 20.075819 | 26.402768 | IWS1      | 0.760367948 |
| 9567 | 4.3111192 | 5.6703573 | TANGO6    | 0.760290565 |
| 9568 | 2.5060065 | 3.2961168 | CLUAP1    | 0.760290565 |
| 9569 | 1.2152992 | 1.5984667 | CDC14A    | 0.760290565 |
| 9570 | 23.086544 | 30.370224 | IGBP1     | 0.760170361 |
| 9571 | 64.819911 | 85.270243 | MAD2L2    | 0.760170361 |
| 9572 | 10.736799 | 14.128776 | RP9       | 0.75992416  |
| 9573 | 15.699157 | 20.668199 | NAMPT     | 0.759580315 |
| 9574 | 14.781051 | 19.464867 | UGGT1     | 0.759370743 |
| 9575 | 5.4153992 | 7.133638  | TRMT12    | 0.759135693 |
| 9576 | 9.9869141 | 13.163006 | USP21     | 0.758710741 |
| 9577 | 27.672319 | 36.472818 | SCAP      | 0.758710741 |
| 9578 | 4.7183217 | 6.2188677 | C22orf46  | 0.758710741 |
| 9579 | 2.7420987 | 3.6162891 | ARL9      | 0.758263124 |
| 9580 | 5.55732   | 7.3290126 | IBTK      | 0.758263124 |
| 9581 | 2.6733464 | 3.5256183 | ZNF195    | 0.758263123 |
| 9582 | 1.9762022 | 2.6062222 | RGS4      | 0.758263123 |
| 9583 | 1.0458004 | 1.3792052 | LOC284889 | 0.758263123 |
| 9584 | 8.0097642 | 10.563304 | KIAA1704  | 0.758263123 |
| 9585 | 1.8302551 | 2.4137467 | TUBD1     | 0.758263123 |
| 9586 | 10.506125 | 13.859209 | PPP1R26   | 0.758060974 |
| 9587 | 15.56021  | 20.528406 | 6-Mar     | 0.757984325 |

|      |           |           |          |             |
|------|-----------|-----------|----------|-------------|
| 9588 | 5.1043511 | 6.7346077 | FAM126A  | 0.757928497 |
| 9589 | 4.056156  | 5.3518197 | DOCK7    | 0.757902218 |
| 9590 | 6.52219   | 8.6105886 | NKIRAS1  | 0.757461577 |
| 9591 | 8.9883962 | 11.867247 | FNBP4    | 0.757412099 |
| 9592 | 17.065786 | 22.535271 | OXLD1    | 0.757292236 |
| 9593 | 3.6635477 | 4.8376934 | LRRC40   | 0.757292236 |
| 9594 | 1242.0698 | 1640.4285 | PKM      | 0.757161787 |
| 9595 | 7.0093351 | 9.2589659 | ZNF32    | 0.757032177 |
| 9596 | 3.1610727 | 4.1756121 | LDB2     | 0.757032177 |
| 9597 | 12.17851  | 16.093367 | RNF20    | 0.756740943 |
| 9598 | 104.54184 | 138.15887 | GLTSCR2  | 0.756678457 |
| 9599 | 31.534135 | 41.694474 | DTD1     | 0.756314487 |
| 9600 | 4.3416563 | 5.7413715 | CCDC91   | 0.756205422 |
| 9601 | 5.4753756 | 7.2405929 | RALGDS   | 0.756205422 |
| 9602 | 14.279563 | 18.88408  | DHX37    | 0.756169364 |
| 9603 | 226.54177 | 299.65176 | MDH2     | 0.756016834 |
| 9604 | 2.380614  | 3.1491851 | SNX30    | 0.755946047 |
| 9605 | 2.2063097 | 2.9198982 | TYW5     | 0.755611854 |
| 9606 | 5.0973993 | 6.7485743 | FILIP1L  | 0.755329804 |
| 9607 | 65.461779 | 86.696857 | RAB13    | 0.7550652   |
| 9608 | 22.518046 | 29.822978 | MAD2L1   | 0.755056937 |
| 9609 | 9.3046872 | 12.327085 | TBPL1    | 0.754816473 |
| 9610 | 2.8451774 | 3.7693631 | TEP1     | 0.754816473 |
| 9611 | 25.206685 | 33.402483 | ZMIZ2    | 0.75463507  |
| 9612 | 3.6231723 | 4.8018483 | LACTB2   | 0.754537015 |
| 9613 | 3.286243  | 4.3566331 | GNPTAB   | 0.754307951 |
| 9614 | 146.17879 | 193.8331  | PPIB     | 0.75414772  |
| 9615 | 2.6125299 | 3.4660269 | EIF4E3   | 0.753753487 |
| 9616 | 6.0339736 | 8.0056107 | MLL5     | 0.75371809  |
| 9617 | 9.115244  | 12.099785 | RANGRF   | 0.753339337 |
| 9618 | 4.5657521 | 6.0621521 | CENPL    | 0.753156975 |
| 9619 | 6.8346695 | 9.0746946 | FBXL6    | 0.753156975 |
| 9620 | 10.369674 | 13.770815 | PISD     | 0.75301822  |
| 9621 | 4.6670536 | 6.1986946 | LRIF1    | 0.752909103 |
| 9622 | 9.6125231 | 12.767176 | GPN3     | 0.752909103 |
| 9623 | 46.596214 | 61.894965 | RALY     | 0.75282721  |
| 9624 | 2.8093485 | 3.7317613 | NCOA2    | 0.752821044 |
| 9625 | 16.400279 | 21.788956 | ZNF581   | 0.752687659 |
| 9626 | 5.6407156 | 7.4963478 | PRKAB2   | 0.752461831 |
| 9627 | 11.217403 | 14.907603 | VWA9     | 0.75246183  |
| 9628 | 19.286189 | 25.640081 | C1orf198 | 0.752189108 |
| 9629 | 0.6738868 | 0.8961303 | ARHGEF35 | 0.751996487 |
| 9630 | 1.4176837 | 1.8852265 | ZNF552   | 0.751996487 |



|      |           |           |           |             |
|------|-----------|-----------|-----------|-------------|
| 9631 | 1.8111852 | 2.4085022 | LOC254128 | 0.751996486 |
| 9632 | 0.1712228 | 0.2276909 | ST8SIA1   | 0.751996486 |
| 9633 | 2.0971019 | 2.7887124 | IMMP1L    | 0.751996486 |
| 9634 | 2.7973087 | 3.7198428 | RHEBL1    | 0.751996486 |
| 9635 | 13.967369 | 18.573716 | OSTF1     | 0.751996486 |
| 9636 | 0.7672324 | 1.0202606 | PHOSPHO1  | 0.751996486 |
| 9637 | 0.12384   | 0.1646816 | OBSCN     | 0.751996484 |
| 9638 | 22.898735 | 30.475985 | CXXC1     | 0.751369822 |
| 9639 | 37.279798 | 49.619853 | SPRY4     | 0.751308125 |
| 9640 | 2.9725696 | 3.9567676 | GLTSCR1L  | 0.751262115 |
| 9641 | 6.9388535 | 9.2366671 | MFAP3     | 0.751229143 |
| 9642 | 6.174206  | 8.2201123 | NGLY1     | 0.751109698 |
| 9643 | 12.066486 | 16.067491 | KPNA1     | 0.750987547 |
| 9644 | 3.0843824 | 4.1086269 | NDRG4     | 0.750708821 |
| 9645 | 4.8824172 | 6.504652  | TRAF3IP1  | 0.7506039   |
| 9646 | 23.138751 | 30.83354  | AAR2      | 0.750440938 |
| 9647 | 14.042313 | 18.717882 | GNL1      | 0.750208451 |
| 9648 | 5.6950303 | 7.5926625 | KLHL42    | 0.750070266 |
| 9649 | 4.9356515 | 6.5807759 | SMYD4     | 0.75001058  |
| 9650 | 1.7543835 | 2.3393947 | RNF169    | 0.749930562 |
| 9651 | 16.498294 | 22.002307 | SLC25A24  | 0.749843824 |
| 9652 | 41.050639 | 54.747602 | SON       | 0.74981619  |
| 9653 | 1.0527061 | 1.40427   | CCDC132   | 0.749646497 |
| 9654 | 4.1911134 | 5.5907863 | UBXN8     | 0.749646497 |
| 9655 | 5.4792253 | 7.3090788 | LINC00339 | 0.749646497 |
| 9656 | 92.457443 | 123.38411 | RPL17     | 0.749346416 |
| 9657 | 34.132383 | 45.553164 | TCF3      | 0.749286757 |
| 9658 | 0.951389  | 1.2706277 | ZNF234    | 0.748755122 |
| 9659 | 8.4722533 | 11.315119 | SEC24B    | 0.748755122 |
| 9660 | 2.6166753 | 3.4947011 | ARSK      | 0.748755122 |
| 9661 | 4.0773815 | 5.4455474 | PPP1R21   | 0.748755122 |
| 9662 | 7.235695  | 9.6636333 | VAR52     | 0.748755122 |
| 9663 | 5.3577396 | 7.1580736 | MCPH1     | 0.74848904  |
| 9664 | 31.550203 | 42.168224 | PLCG1     | 0.748198524 |
| 9665 | 12.01178  | 16.055827 | EDEM2     | 0.748125916 |
| 9666 | 6.4190138 | 8.5806534 | RMND5A    | 0.748079838 |
| 9667 | 12.885771 | 17.231572 | SRRD      | 0.747800077 |
| 9668 | 7.2560531 | 9.7060121 | RBBP5     | 0.747583361 |
| 9669 | 56.163932 | 75.129409 | UBE2I     | 0.747562545 |
| 9670 | 9.3849943 | 12.554327 | ADCK2     | 0.747550561 |
| 9671 | 26.785875 | 35.858739 | NCKAP1    | 0.746983176 |
| 9672 | 0.51486   | 0.6894453 | ZNF566    | 0.746774289 |
| 9673 | 4.5918534 | 6.1489174 | ARL14EP   | 0.746774288 |

|      |           |           |           |             |
|------|-----------|-----------|-----------|-------------|
| 9674 | 2.4673893 | 3.3040631 | CCDC138   | 0.746774288 |
| 9675 | 0.569637  | 0.7627967 | GAB3      | 0.746774288 |
| 9676 | 66.096024 | 88.514235 | STT3A     | 0.746727624 |
| 9677 | 174.42132 | 233.58738 | NDUFB9    | 0.746706945 |
| 9678 | 90.937964 | 121.79662 | TFG       | 0.746637841 |
| 9679 | 9.6711062 | 12.953691 | MTMR2     | 0.746590761 |
| 9680 | 46.411132 | 62.171156 | APEH      | 0.746505858 |
| 9681 | 40.060608 | 53.669965 | NUSAP1    | 0.746425084 |
| 9682 | 11.438738 | 15.326394 | C15orf57  | 0.746342377 |
| 9683 | 207.36062 | 277.90695 | RPL34     | 0.746151249 |
| 9684 | 18.508207 | 24.805889 | UBALD1    | 0.746121514 |
| 9685 | 3.5185935 | 4.7163151 | ESCO2     | 0.746047147 |
| 9686 | 9.3798349 | 12.574286 | MON1A     | 0.745953658 |
| 9687 | 14.112327 | 18.919934 | ADSS      | 0.745897278 |
| 9688 | 3.9763998 | 5.3314912 | TAF1B     | 0.745832581 |
| 9689 | 34.452526 | 46.203474 | DHPS      | 0.745669593 |
| 9690 | 16.900923 | 22.66823  | CELF1     | 0.745577535 |
| 9691 | 1.9957938 | 2.6773424 | LMBRD2    | 0.745438377 |
| 9692 | 15.058908 | 20.209331 | PDXK      | 0.745146316 |
| 9693 | 4.9522675 | 6.6465827 | C8orf58   | 0.745084754 |
| 9694 | 6.3366897 | 8.5046563 | IFT57     | 0.745084754 |
| 9695 | 4.8660109 | 6.5316432 | USP25     | 0.744990308 |
| 9696 | 63.457287 | 85.198715 | EIF4A3    | 0.744815074 |
| 9697 | 3.8612362 | 5.1865118 | CORO1A    | 0.744476521 |
| 9698 | 94.060019 | 126.34931 | ILF3      | 0.744444426 |
| 9699 | 8.2081749 | 11.028391 | CNOT4     | 0.744276715 |
| 9700 | 13.345435 | 17.933479 | UGDH-AS1  | 0.744163189 |
| 9701 | 10.700776 | 14.38579  | NEIL2     | 0.743843463 |
| 9702 | 5.2840351 | 7.1040174 | ATP11A    | 0.743809428 |
| 9703 | 4.3722039 | 5.8785863 | SPG11     | 0.743750911 |
| 9704 | 14.076408 | 18.926239 | PBDC1     | 0.743750911 |
| 9705 | 9.098782  | 12.235112 | SMAP1     | 0.74366155  |
| 9706 | 11.19863  | 15.06109  | PPIL3     | 0.743547087 |
| 9707 | 21.370188 | 28.748151 | AGTRAP    | 0.743358689 |
| 9708 | 0.9117726 | 1.2268463 | DSC2      | 0.743184028 |
| 9709 | 2.7997596 | 3.7672495 | LOC642361 | 0.743184027 |
| 9710 | 90.928407 | 122.37741 | PSMC1     | 0.743016258 |
| 9711 | 10.257564 | 13.80578  | PSPC1     | 0.742990541 |
| 9712 | 11.50851  | 15.489871 | POLE      | 0.742970038 |
| 9713 | 43.489044 | 58.546453 | LAMTOR1   | 0.742812621 |
| 9714 | 92.203599 | 124.1335  | PGD       | 0.742777753 |
| 9715 | 5.8301561 | 7.8496419 | FAM122A   | 0.742728924 |
| 9716 | 16.048179 | 21.608123 | AXIN1     | 0.742691961 |

|      |           |           |              |             |
|------|-----------|-----------|--------------|-------------|
| 9717 | 5.2801669 | 7.1104115 | NFYA         | 0.74259653  |
| 9718 | 8.3170298 | 11.199931 | BLOC1S6      | 0.74259653  |
| 9719 | 3.8476385 | 5.1820289 | NKTR         | 0.74249653  |
| 9720 | 24.937906 | 33.591308 | DDX54        | 0.742391626 |
| 9721 | 4.2211096 | 5.6877408 | WDR47        | 0.742141693 |
| 9722 | 8.8429774 | 11.916124 | ZNF281       | 0.742101795 |
| 9723 | 68.641972 | 92.500693 | CCDC86       | 0.742069808 |
| 9724 | 6.2208806 | 8.3834436 | ZNF623       | 0.742043591 |
| 9725 | 252.93539 | 340.86932 | ACTN1        | 0.742030373 |
| 9726 | 6.9511058 | 9.3728152 | BCL10        | 0.741624121 |
| 9727 | 3.8105497 | 5.1386137 | RABL3        | 0.74155209  |
| 9728 | 29.860227 | 40.271967 | UPF1         | 0.741464322 |
| 9729 | 3.7266734 | 5.0268404 | ZNF232       | 0.741355026 |
| 9730 | 412.73617 | 556.79904 | RPS19        | 0.741265943 |
| 9731 | 9.7828562 | 13.198005 | BID          | 0.7412375   |
| 9732 | 47.648206 | 64.31241  | STARD7       | 0.740886658 |
| 9733 | 23.817086 | 32.174532 | G3BP2        | 0.740246541 |
| 9734 | 10.845058 | 14.652276 | FYTTD1       | 0.740162009 |
| 9735 | 3.7659174 | 5.0916969 | TULP4        | 0.73961932  |
| 9736 | 7.1112626 | 9.6157109 | WDR24        | 0.739546213 |
| 9737 | 5.2808561 | 7.1412851 | JRK          | 0.739482613 |
| 9738 | 108.42594 | 146.67162 | AKT1         | 0.739242777 |
| 9739 | 27.417183 | 37.094124 | SREBF2       | 0.739124687 |
| 9740 | 20.562862 | 27.832126 | CCNF         | 0.738817494 |
| 9741 | 0.2542077 | 0.34419   | LMOD3        | 0.738567979 |
| 9742 | 0.5305486 | 0.7183477 | LOC646903    | 0.738567978 |
| 9743 | 0.138896  | 0.1880612 | ZFP14        | 0.738567978 |
| 9744 | 0.2422687 | 0.3280249 | LOC595101    | 0.738567978 |
| 9745 | 3.2630402 | 4.4180635 | WBSCR27      | 0.738567978 |
| 9746 | 2.9720408 | 4.0240586 | CENPQ        | 0.738567978 |
| 9747 | 7.3071354 | 9.8936531 | ZNF689       | 0.738567978 |
| 9748 | 1.7660975 | 2.3912456 | PI4KAP1      | 0.738567978 |
| 9749 | 1.9199743 | 2.5995906 | LOC643406    | 0.738567977 |
| 9750 | 1.1150321 | 1.5097217 | ESAM         | 0.738567977 |
| 9751 | 3.8551705 | 5.219791  | DLX6         | 0.738567977 |
| 9752 | 0.4495244 | 0.6086432 | LOC100506688 | 0.738567977 |
| 9753 | 0.7458822 | 1.0099033 | RPSAP58      | 0.738567977 |
| 9754 | 2.9499058 | 3.9940884 | FBXO10       | 0.738567977 |
| 9755 | 2.5072125 | 3.3946943 | C6orf70      | 0.738567977 |
| 9756 | 0.2483903 | 0.3363135 | MMRN2        | 0.738567977 |
| 9757 | 2.6209064 | 3.5486326 | DNAJB14      | 0.738567977 |
| 9758 | 1.4100102 | 1.9091136 | ALX3         | 0.738567977 |
| 9759 | 0.320516  | 0.4339695 | MROH6        | 0.738567977 |

|      |           |           |              |             |
|------|-----------|-----------|--------------|-------------|
| 9760 | 0.6522676 | 0.8831518 | PRRT2        | 0.738567977 |
| 9761 | 0.9408555 | 1.2738916 | BFSP1        | 0.738567977 |
| 9762 | 0.497611  | 0.6737512 | ZNF699       | 0.738567977 |
| 9763 | 0.7246158 | 0.9811091 | LOC100128822 | 0.738567977 |
| 9764 | 0.4418989 | 0.5983185 | ZNF350       | 0.738567976 |
| 9765 | 0.1078337 | 0.1460038 | ADAMTS5      | 0.738567974 |
| 9766 | 47.91811  | 64.898787 | DDX41        | 0.738351389 |
| 9767 | 25.551437 | 34.609571 | KIF5B        | 0.738276629 |
| 9768 | 24.758982 | 33.536186 | MEPCE        | 0.738276629 |
| 9769 | 9.4852015 | 12.851556 | STX6         | 0.73805862  |
| 9770 | 5.7071322 | 7.7330439 | ZMYM4        | 0.738018856 |
| 9771 | 14.008597 | 18.983967 | UBLCP1       | 0.737917257 |
| 9772 | 7.4584427 | 10.110591 | ZFYVE20      | 0.737686106 |
| 9773 | 15.478143 | 20.985615 | ZNF410       | 0.737559694 |
| 9774 | 9.6174387 | 13.040592 | STK35        | 0.737500168 |
| 9775 | 31.930517 | 43.302854 | NRD1         | 0.737376739 |
| 9776 | 68.438889 | 92.823318 | EIF4E2       | 0.737302765 |
| 9777 | 5.6107558 | 7.6108977 | N4BP2L2      | 0.737200259 |
| 9778 | 6.0852338 | 8.2545193 | FBLN5        | 0.737200259 |
| 9779 | 33.535552 | 45.498847 | CHTOP        | 0.737063766 |
| 9780 | 9.5417539 | 12.946809 | DHX34        | 0.736996556 |
| 9781 | 9.1516227 | 12.417959 | ETV6         | 0.736966746 |
| 9782 | 113.80232 | 154.4228  | HMGN1        | 0.736952818 |
| 9783 | 14.042509 | 19.062034 | ARHGEF18     | 0.736674213 |
| 9784 | 3.3200901 | 4.5076571 | ZNF337       | 0.736544503 |
| 9785 | 28.496617 | 38.69496  | MRPS28       | 0.736442602 |
| 9786 | 306.27793 | 415.9143  | DRAP1        | 0.736396749 |
| 9787 | 5.5683778 | 7.5623411 | TMEM177      | 0.736329893 |
| 9788 | 6.9042128 | 9.3765211 | ZNF740       | 0.736329893 |
| 9789 | 17.086456 | 23.205841 | OXSRI        | 0.736299823 |
| 9790 | 52.195432 | 70.892925 | BRD2         | 0.736257278 |
| 9791 | 5.2512898 | 7.1329221 | GMIP         | 0.73620456  |
| 9792 | 9.4658749 | 12.860119 | CDIP1        | 0.736064357 |
| 9793 | 6.1457513 | 8.3494755 | N4BP1        | 0.736064357 |
| 9794 | 31.984391 | 43.455028 | SRXN1        | 0.736034296 |
| 9795 | 325.72106 | 442.89952 | CCND1        | 0.73542879  |
| 9796 | 10.19375  | 13.865311 | GCLC         | 0.735198085 |
| 9797 | 10.099739 | 13.738289 | SPTSSA       | 0.735152634 |
| 9798 | 52.508132 | 71.43468  | PTPN1        | 0.735050987 |
| 9799 | 3.9220321 | 5.3360355 | PPP2R5A      | 0.735008614 |
| 9800 | 73.930456 | 100.5965  | NAA10        | 0.734920728 |
| 9801 | 4.7928335 | 6.5236952 | RPP40        | 0.734680778 |
| 9802 | 3.0170437 | 4.1066049 | ZBTB12       | 0.734680777 |

|      |           |           |          |             |
|------|-----------|-----------|----------|-------------|
| 9803 | 189.69937 | 258.23318 | RAB7A    | 0.73460493  |
| 9804 | 18.17467  | 24.74546  | DCTN4    | 0.734464822 |
| 9805 | 123.15989 | 167.69533 | EIF3H    | 0.734426475 |
| 9806 | 28.07595  | 38.237031 | YTHDF2   | 0.73426072  |
| 9807 | 921.08121 | 1254.5545 | RPL19    | 0.734189868 |
| 9808 | 103.43317 | 140.88364 | SRRM2    | 0.734174422 |
| 9809 | 4.7458529 | 6.4685563 | SRGAP1   | 0.733680395 |
| 9810 | 13.780477 | 18.783075 | PROSC    | 0.733664621 |
| 9811 | 5.3124417 | 7.241826  | ZBTB1    | 0.733577653 |
| 9812 | 13.656015 | 18.616305 | GGNBP2   | 0.733551289 |
| 9813 | 5.5468576 | 7.5626237 | CRAMP1L  | 0.73345678  |
| 9814 | 4.2516286 | 5.7970284 | RINT1    | 0.733415178 |
| 9815 | 13.373483 | 18.235281 | ADCY3    | 0.733385044 |
| 9816 | 26.99978  | 36.822745 | LYPLA1   | 0.733236489 |
| 9817 | 1.7422466 | 2.376234  | EIF2AK3  | 0.733196574 |
| 9818 | 5.9586367 | 8.1269293 | GTPBP8   | 0.733196574 |
| 9819 | 17.868188 | 24.37492  | PAFAH1B3 | 0.733056276 |
| 9820 | 2.6039088 | 3.5535994 | TMTC3    | 0.732752482 |
| 9821 | 6.3151364 | 8.618376  | ST7      | 0.732752482 |
| 9822 | 117.4846  | 160.37947 | TKT      | 0.732541414 |
| 9823 | 1.6537069 | 2.2578878 | FAM73A   | 0.732413244 |
| 9824 | 2.3020088 | 3.1430463 | IMMP2L   | 0.732413244 |
| 9825 | 2.8162095 | 3.84511   | DNAJC25  | 0.732413244 |
| 9826 | 1.9047266 | 2.6006174 | RBM45    | 0.732413244 |
| 9827 | 14.31272  | 19.546338 | SNAP23   | 0.732245606 |
| 9828 | 19.419631 | 26.523397 | MAGT1    | 0.732169837 |
| 9829 | 644.00712 | 879.67995 | RPS15A   | 0.732092526 |
| 9830 | 12.930014 | 17.663182 | SETD1A   | 0.732031978 |
| 9831 | 6.3582523 | 8.6862951 | ACVR1B   | 0.731986679 |
| 9832 | 7.0539934 | 9.6398897 | CXorf40B | 0.731750427 |
| 9833 | 6.5210197 | 8.9151243 | PKN2     | 0.731455841 |
| 9834 | 0.6672097 | 0.9122833 | NBEAL1   | 0.731362437 |
| 9835 | 5.9778294 | 8.1735527 | HUS1     | 0.731362436 |
| 9836 | 2.6159788 | 3.5775385 | ITPR1    | 0.731223102 |
| 9837 | 15.136385 | 20.700328 | RBM15B   | 0.731214739 |
| 9838 | 17.543835 | 23.993791 | NXT1     | 0.731182297 |
| 9839 | 38.788013 | 53.05059  | MRPL32   | 0.731151395 |
| 9840 | 12.844167 | 17.56969  | SUGT1    | 0.73104117  |
| 9841 | 147.34388 | 201.63691 | ATP5A1   | 0.730738635 |
| 9842 | 3.4467697 | 4.7171442 | TP73-AS1 | 0.730689919 |
| 9843 | 27.272985 | 37.329195 | ERF      | 0.730607365 |
| 9844 | 1.5441766 | 2.1156613 | ICOSLG   | 0.729878943 |
| 9845 | 4.1158558 | 5.6390938 | SIAE     | 0.729878943 |

|      |           |           |          |             |
|------|-----------|-----------|----------|-------------|
| 9846 | 9.6981259 | 13.287307 | BRD3     | 0.729878943 |
| 9847 | 0.6914001 | 0.9472805 | IFIH1    | 0.729878942 |
| 9848 | 3.3680727 | 4.6145635 | GCFC2    | 0.729878942 |
| 9849 | 1.4593235 | 1.9994048 | RBM41    | 0.729878942 |
| 9850 | 0.6161109 | 0.8441275 | ZNF449   | 0.729878942 |
| 9851 | 4.8750472 | 6.6820811 | CDC73    | 0.729570195 |
| 9852 | 19.66033  | 26.955067 | METTL17  | 0.729374185 |
| 9853 | 2.6870508 | 3.6842433 | LIN54    | 0.729335878 |
| 9854 | 17.225224 | 23.620831 | CIAO1    | 0.729238698 |
| 9855 | 13.069524 | 17.925578 | USE1     | 0.729099157 |
| 9856 | 16.656687 | 22.84809  | MTOR     | 0.729018816 |
| 9857 | 49.222233 | 67.529141 | MGLL     | 0.728903586 |
| 9858 | 4.7538727 | 6.5235894 | HIVEP2   | 0.728720404 |
| 9859 | 2.9405483 | 4.0364612 | PLEKHA5  | 0.728496596 |
| 9860 | 3.7702857 | 5.1754335 | THAP5    | 0.728496596 |
| 9861 | 6.3383709 | 8.7006184 | DSE      | 0.728496596 |
| 9862 | 19.903323 | 27.336747 | AIFM1    | 0.728079438 |
| 9863 | 24.728255 | 33.976151 | MRPL47   | 0.727812133 |
| 9864 | 5.9237509 | 8.1395527 | KLHDC10  | 0.727773522 |
| 9865 | 1.5968237 | 2.1945659 | EPM2AIP1 | 0.72762623  |
| 9866 | 71.775684 | 98.683387 | PARP1    | 0.727332998 |
| 9867 | 23.212816 | 31.928372 | RALA     | 0.727027853 |
| 9868 | 16.904153 | 23.257894 | CFL2     | 0.72681358  |
| 9869 | 0.803915  | 1.1064199 | C4orf21  | 0.7265912   |
| 9870 | 1.4612694 | 2.0111301 | ZFAND4   | 0.7265912   |
| 9871 | 3.250681  | 4.4747615 | PTPN3    | 0.726447888 |
| 9872 | 4.5186362 | 6.2229864 | KIAA1715 | 0.726120203 |
| 9873 | 7.1070842 | 9.7880996 | GPBP1    | 0.726094385 |
| 9874 | 16.732807 | 23.048051 | SS18L2   | 0.725996607 |
| 9875 | 48.482429 | 66.792343 | SNRNP200 | 0.725868061 |
| 9876 | 12.107529 | 16.683395 | ZC3HC1   | 0.725723317 |
| 9877 | 3.2391062 | 4.4645894 | RASGRF2  | 0.725510422 |
| 9878 | 2.3907192 | 3.2959985 | TCEANC2  | 0.725339894 |
| 9879 | 5.2562228 | 7.2485681 | ARMCX1   | 0.725139469 |
| 9880 | 12.00781  | 16.564769 | RAB6A    | 0.724900528 |
| 9881 | 2.8461872 | 3.9265196 | NINL     | 0.724862592 |
| 9882 | 15.445243 | 21.308455 | TMOD3    | 0.724841057 |
| 9883 | 30.068833 | 41.485668 | CDCA8    | 0.724800497 |
| 9884 | 13.728557 | 18.942134 | LRCH3    | 0.724762968 |
| 9885 | 2.4684037 | 3.4061965 | CCNT2    | 0.724680374 |
| 9886 | 8.8407038 | 12.203244 | RWDD4    | 0.724455214 |
| 9887 | 4.9883658 | 6.8877923 | ALS2     | 0.724232903 |
| 9888 | 15.249488 | 21.060319 | ASB1     | 0.724086252 |

|      |           |           |              |             |
|------|-----------|-----------|--------------|-------------|
| 9889 | 0.3409997 | 0.4711263 | ZIC4         | 0.723796619 |
| 9890 | 0.1401207 | 0.1935912 | AKAP6        | 0.723796619 |
| 9891 | 0.5995875 | 0.8283923 | MSS51        | 0.723796619 |
| 9892 | 0.4756428 | 0.6571498 | ZNF140       | 0.723796618 |
| 9893 | 0.4274235 | 0.5905299 | ARMC2        | 0.723796618 |
| 9894 | 0.7919634 | 1.0941794 | GTF2H2D      | 0.723796618 |
| 9895 | 0.6249307 | 0.8634065 | RAB27B       | 0.723796618 |
| 9896 | 0.3376062 | 0.466438  | PRICKLE1     | 0.723796618 |
| 9897 | 1.5847871 | 2.1895475 | C8orf4       | 0.723796618 |
| 9898 | 0.191017  | 0.2639097 | MCTP2        | 0.723796618 |
| 9899 | 0.9016048 | 1.2456604 | FBXL8        | 0.723796618 |
| 9900 | 0.5660832 | 0.7821026 | ZNF510       | 0.723796618 |
| 9901 | 0.6025595 | 0.8324983 | LOC90834     | 0.723796618 |
| 9902 | 1.1745543 | 1.6227685 | SPINT1       | 0.723796618 |
| 9903 | 2.716567  | 3.7532188 | ABHD5        | 0.723796618 |
| 9904 | 33.089073 | 45.715981 | EIF1B        | 0.723796618 |
| 9905 | 2.784722  | 3.8473819 | AGO3         | 0.723796618 |
| 9906 | 5.2640264 | 7.2798246 | SETD1B       | 0.723097973 |
| 9907 | 16.810988 | 23.255521 | INPP5A       | 0.722881578 |
| 9908 | 4.6461902 | 6.4290687 | NPTXR        | 0.722684795 |
| 9909 | 8.0005655 | 11.071331 | NSD1         | 0.72263808  |
| 9910 | 2.6174039 | 3.6224494 | SPRTN        | 0.722550841 |
| 9911 | 135.05122 | 186.92344 | RAC1         | 0.722494825 |
| 9912 | 77.075342 | 106.6855  | POLD2        | 0.722453767 |
| 9913 | 8.7010843 | 12.045021 | RNF216P1     | 0.722380186 |
| 9914 | 18.365448 | 25.427187 | RPF2         | 0.722276037 |
| 9915 | 169.51336 | 234.77403 | NOP10        | 0.722027731 |
| 9916 | 20.035438 | 27.755847 | THOC5        | 0.721845683 |
| 9917 | 3.9427957 | 5.4630943 | RPS6KB1      | 0.721714749 |
| 9918 | 4.8497534 | 6.7197649 | INPP5B       | 0.721714748 |
| 9919 | 11.812831 | 16.369368 | CDR2L        | 0.721642461 |
| 9920 | 11.954318 | 16.567209 | RNASEH2B     | 0.721564974 |
| 9921 | 12.209531 | 16.92354  | BRPF1        | 0.721452548 |
| 9922 | 3.8711981 | 5.3662894 | C20orf96     | 0.721391978 |
| 9923 | 3.2957222 | 4.5685595 | LOC100506668 | 0.721391978 |
| 9924 | 71.435911 | 99.042413 | CAPN2        | 0.721265861 |
| 9925 | 70.291251 | 97.456487 | ATP1B3       | 0.72125779  |
| 9926 | 16.627913 | 23.056861 | FAM107B      | 0.72116984  |
| 9927 | 5.9051732 | 8.1888256 | RB1CC1       | 0.721125782 |
| 9928 | 26.138543 | 36.247763 | TGFBR2       | 0.721107742 |
| 9929 | 4.1445304 | 5.747706  | GSKIP        | 0.721075578 |
| 9930 | 22.987463 | 31.884928 | RPUSD1       | 0.72095076  |
| 9931 | 5.1207621 | 7.1034486 | SDE2         | 0.720883955 |

|      |           |           |          |             |
|------|-----------|-----------|----------|-------------|
| 9932 | 13.064387 | 18.124493 | MAPKAPK5 | 0.720813939 |
| 9933 | 23.688171 | 32.864027 | CMPK1    | 0.720793312 |
| 9934 | 140.48269 | 194.90126 | NME1     | 0.720789009 |
| 9935 | 4.6930697 | 6.512153  | RMDN1    | 0.720663299 |
| 9936 | 35.949134 | 49.898181 | GLTP     | 0.720449785 |
| 9937 | 9.4471946 | 13.116893 | PLSCR1   | 0.720231118 |
| 9938 | 1.929625  | 2.6796485 | SCML2    | 0.720103778 |
| 9939 | 21.604556 | 30.008617 | UAP1     | 0.71994506  |
| 9940 | 1.7229116 | 2.3937914 | PTPN13   | 0.719741735 |
| 9941 | 5.6898152 | 7.9053568 | E2F2     | 0.719741735 |
| 9942 | 13.735422 | 19.08597  | THG1L    | 0.719660637 |
| 9943 | 33.17673  | 46.107781 | NACA     | 0.719547323 |
| 9944 | 39.802427 | 55.319739 | RNF126   | 0.719497732 |
| 9945 | 4.6357826 | 6.444844  | C17orf51 | 0.719300987 |
| 9946 | 138.1577  | 192.10029 | COX7C    | 0.719195703 |
| 9947 | 48.423102 | 67.348557 | SRSF1    | 0.718992417 |
| 9948 | 38.059279 | 52.937328 | CDC34    | 0.718949766 |
| 9949 | 2.04118   | 2.8407365 | PCMTD1   | 0.718539015 |
| 9950 | 5.1360594 | 7.1497556 | PYCR1    | 0.718354538 |
| 9951 | 2.7302555 | 3.8011471 | ZNF587   | 0.718271453 |
| 9952 | 86.39035  | 120.28162 | NME4     | 0.718233986 |
| 9953 | 0.993514  | 1.3836237 | ACVR2A   | 0.7180522   |
| 9954 | 2.5724209 | 3.5863756 | ICK      | 0.717275928 |
| 9955 | 14.066618 | 19.620497 | WIPI2    | 0.716934865 |
| 9956 | 4.5003214 | 6.2774454 | MKS1     | 0.716903317 |
| 9957 | 4.3670112 | 6.092824  | AP1AR    | 0.716746651 |
| 9958 | 9.5885617 | 13.381744 | GTF2H3   | 0.716540512 |
| 9959 | 649.48877 | 906.56489 | RPS5     | 0.716428337 |
| 9960 | 4.6053885 | 6.4286435 | FBXW2    | 0.716385731 |
| 9961 | 20.797506 | 29.041772 | EMC8     | 0.716123862 |
| 9962 | 0.5040568 | 0.7041446 | ZNF483   | 0.715842809 |
| 9963 | 0.92622   | 1.2938874 | ATP6V1E2 | 0.715842809 |
| 9964 | 35.011116 | 48.908944 | PCNP     | 0.715842809 |
| 9965 | 3.9391445 | 5.5028065 | CLK1     | 0.715842809 |
| 9966 | 1.3556888 | 1.8938359 | ZNF18    | 0.715842809 |
| 9967 | 6.9984907 | 9.7765747 | ZBTB48   | 0.715842809 |
| 9968 | 4.113148  | 5.7458816 | BCAS4    | 0.715842809 |
| 9969 | 4.8527697 | 6.7790996 | BLOC1S4  | 0.715842809 |
| 9970 | 1.7561756 | 2.4532978 | DPH3P1   | 0.715842809 |
| 9971 | 0.4324638 | 0.6041324 | VASH2    | 0.715842808 |
| 9972 | 119.0027  | 166.26472 | HSP90B1  | 0.71574234  |
| 9973 | 33.075998 | 46.213092 | IMMT     | 0.715727869 |
| 9974 | 11.788359 | 16.473385 | HIRA     | 0.715600315 |



|       |           |           |          |             |
|-------|-----------|-----------|----------|-------------|
| 9975  | 7.6155867 | 10.649689 | RBM7     | 0.715099463 |
| 9976  | 16.550365 | 23.146037 | PERP     | 0.715041013 |
| 9977  | 67.210761 | 94.006081 | PCNA     | 0.714961849 |
| 9978  | 32.172786 | 45.003739 | ZC3H18   | 0.714891396 |
| 9979  | 6.0830712 | 8.5094478 | AGPS     | 0.714860857 |
| 9980  | 17.79251  | 24.89601  | MPHOSPH6 | 0.714673131 |
| 9981  | 2.4428923 | 3.4181952 | EEA1     | 0.714673131 |
| 9982  | 39.452021 | 55.212439 | ATP5E    | 0.714549507 |
| 9983  | 20.659648 | 28.917103 | EXOC3    | 0.714443898 |
| 9984  | 40.10755  | 56.150409 | FAM120A  | 0.714287756 |
| 9985  | 9.0102992 | 12.618213 | NFATC3   | 0.714070921 |
| 9986  | 14.533771 | 20.369197 | PHF10    | 0.713517134 |
| 9987  | 5.1063798 | 7.1572389 | NUDT9    | 0.713456666 |
| 9988  | 9.9163141 | 13.899852 | ESPL1    | 0.713411514 |
| 9989  | 1160.7593 | 1627.092  | RPL11    | 0.713395012 |
| 9990  | 1.1571322 | 1.6226784 | FAM161B  | 0.713100116 |
| 9991  | 19.824166 | 27.807899 | CNOT11   | 0.712896954 |
| 9992  | 16.195008 | 22.719313 | MRPL39   | 0.712830003 |
| 9993  | 4.6652779 | 6.5447271 | DPH3     | 0.712830003 |
| 9994  | 27.996905 | 39.279902 | PEMT     | 0.712753951 |
| 9995  | 41.91944  | 58.816964 | CCNB2    | 0.712710018 |
| 9996  | 5.6612645 | 7.9434355 | DHX29    | 0.712697235 |
| 9997  | 6.3549795 | 8.9188278 | ZZEF1    | 0.712535284 |
| 9998  | 54.078351 | 75.899348 | MRPL41   | 0.712500872 |
| 9999  | 7.8158458 | 10.970411 | ZNF639   | 0.712447891 |
| 10000 | 9.8182135 | 13.783667 | NR2C2AP  | 0.712307783 |
| 10001 | 9.0165566 | 12.660936 | RAPH1    | 0.712155613 |
| 10002 | 5.5425399 | 7.786563  | FBXL3    | 0.711808268 |
| 10003 | 15.078999 | 21.189322 | CCDC59   | 0.711631969 |
| 10004 | 0.01      | 0.0140549 | CSMD1    | 0.711493559 |
| 10005 | 11.319282 | 15.910451 | GNL3L    | 0.711436909 |
| 10006 | 106.27695 | 149.3894  | GARS     | 0.711408901 |
| 10007 | 19.046075 | 26.773093 | ABRACL   | 0.711388676 |
| 10008 | 17.381523 | 24.437028 | SRCAP    | 0.711278123 |
| 10009 | 3.3751009 | 4.7455517 | XPNPEP3  | 0.711213608 |
| 10010 | 8.0681849 | 11.344676 | TTC19    | 0.711186921 |
| 10011 | 2.0241894 | 2.8474751 | TMEM143  | 0.710871679 |
| 10012 | 10.178367 | 14.31815  | TOR1AIP1 | 0.710871678 |
| 10013 | 3.1759414 | 4.4676719 | C7orf31  | 0.710871678 |
| 10014 | 2.2430475 | 3.1553479 | FLJ46906 | 0.710871678 |
| 10015 | 1.511635  | 2.1264527 | ACSS3    | 0.710871678 |
| 10016 | 3.5458538 | 4.9880364 | THEM4    | 0.710871678 |
| 10017 | 4.2977025 | 6.0456797 | TSNAX    | 0.710871678 |

|       |           |           |          |             |
|-------|-----------|-----------|----------|-------------|
| 10018 | 3.1252822 | 4.3964084 | IPPK     | 0.710871678 |
| 10019 | 100.26727 | 141.07924 | AXL      | 0.710715956 |
| 10020 | 200.73572 | 282.45274 | HNRNPD   | 0.710687795 |
| 10021 | 9.6154195 | 13.53774  | FZD8     | 0.710267709 |
| 10022 | 2.4764601 | 3.4884283 | NAPB     | 0.709907131 |
| 10023 | 3.8765783 | 5.4620889 | STARD13  | 0.709724494 |
| 10024 | 9.4291185 | 13.292266 | WDR41    | 0.709368779 |
| 10025 | 575.38772 | 811.15039 | PPIA     | 0.709347777 |
| 10026 | 15.865384 | 22.372207 | PLOD2    | 0.709155979 |
| 10027 | 13.560093 | 19.124978 | ZC3H11A  | 0.709025258 |
| 10028 | 1.6048945 | 2.2645826 | IBA57    | 0.708693318 |
| 10029 | 4.9953715 | 7.0498803 | KLF3     | 0.708575369 |
| 10030 | 44.159662 | 62.326593 | LAMB1    | 0.708520394 |
| 10031 | 10.110148 | 14.272363 | RFT1     | 0.708372381 |
| 10032 | 1.9180241 | 2.7076494 | CEP350   | 0.708372381 |
| 10033 | 13.518452 | 19.090353 | PPHLN1   | 0.708130024 |
| 10034 | 21.282457 | 30.058956 | PTPN9    | 0.70802381  |
| 10035 | 8.8342576 | 12.47765  | VPS11    | 0.708006544 |
| 10036 | 1.140233  | 1.6117042 | EFCAB7   | 0.707470379 |
| 10037 | 10.504567 | 14.848066 | FBXL18   | 0.707470379 |
| 10038 | 0.4687997 | 0.6626422 | CLYBL    | 0.707470378 |
| 10039 | 8.0905949 | 11.435949 | FBXO9    | 0.707470378 |
| 10040 | 14.654774 | 20.717535 | EPN2     | 0.70736088  |
| 10041 | 18.874371 | 26.683144 | POLD1    | 0.707351814 |
| 10042 | 9.6697368 | 13.673006 | ZNF777   | 0.707213677 |
| 10043 | 4.9681658 | 7.0252365 | PRKCE    | 0.707188405 |
| 10044 | 48.65358  | 68.816434 | THOC7    | 0.707005243 |
| 10045 | 11.497903 | 16.262826 | ARV1     | 0.707005243 |
| 10046 | 26.49458  | 37.486239 | COQ9     | 0.706781507 |
| 10047 | 3.1338271 | 4.4353093 | SGTB     | 0.706563365 |
| 10048 | 12.289709 | 17.398408 | ARAP1    | 0.706369733 |
| 10049 | 6.8293079 | 9.6688494 | TERF1    | 0.706320643 |
| 10050 | 11.137604 | 15.768482 | CDK10    | 0.706320643 |
| 10051 | 33.65625  | 47.652786 | MALSU1   | 0.706280853 |
| 10052 | 11.122002 | 15.753077 | PPP1R15B | 0.706020914 |
| 10053 | 1.3076286 | 1.8528403 | EFHC1    | 0.705742734 |
| 10054 | 24.425123 | 34.614542 | SEC23B   | 0.705631838 |
| 10055 | 10.339408 | 14.65832  | VCAN     | 0.705361045 |
| 10056 | 13.990968 | 19.835992 | FAM213B  | 0.705332418 |
| 10057 | 4.8371961 | 6.8589581 | SATB2    | 0.70523773  |
| 10058 | 7.4428393 | 10.55366  | COMMD2   | 0.70523773  |
| 10059 | 0.3796906 | 0.5385707 | ANKHD1   | 0.704996706 |
| 10060 | 4.1615165 | 5.9028879 | FCHSD2   | 0.704996706 |

|       |           |           |          |             |
|-------|-----------|-----------|----------|-------------|
| 10061 | 12.627954 | 17.912075 | EZH2     | 0.704996706 |
| 10062 | 61.59714  | 87.388317 | LSM12    | 0.704866992 |
| 10063 | 10.552673 | 14.972475 | TAF3     | 0.70480487  |
| 10064 | 197.29159 | 280.08355 | CANX     | 0.704402636 |
| 10065 | 30.318006 | 43.042422 | TPP1     | 0.704375015 |
| 10066 | 13.02096  | 18.486075 | SHCBP1   | 0.704365836 |
| 10067 | 6.3316644 | 8.9903    | PCM1     | 0.704277321 |
| 10068 | 201.02554 | 285.4804  | HNRNPAB  | 0.70416581  |
| 10069 | 30.993853 | 44.023391 | EIF2B5   | 0.704031465 |
| 10070 | 2.5337325 | 3.5990687 | ZNF16    | 0.703996711 |
| 10071 | 40.367942 | 57.341095 | RNF114   | 0.70399671  |
| 10072 | 6.4784439 | 9.2041108 | CHURC1   | 0.703864181 |
| 10073 | 20.316333 | 28.864893 | PPP4R1   | 0.703842325 |
| 10074 | 8.1432022 | 11.572125 | RRN3     | 0.703691156 |
| 10075 | 1.8756808 | 2.6660495 | ZBTB8A   | 0.703543104 |
| 10076 | 39.410794 | 56.017596 | DPM1     | 0.703543104 |
| 10077 | 15.580294 | 22.147004 | TNIP2    | 0.70349443  |
| 10078 | 8.5002807 | 12.08294  | CCDC25   | 0.703494429 |
| 10079 | 21.738687 | 30.904499 | CLK3     | 0.703414982 |
| 10080 | 3.9588224 | 5.6287108 | BTAF1    | 0.703326663 |
| 10081 | 2.2940588 | 3.2626999 | MANEA    | 0.703116715 |
| 10082 | 0.7070029 | 1.0055271 | XRRA1    | 0.703116714 |
| 10083 | 17.52589  | 24.932943 | MYO1E    | 0.702921006 |
| 10084 | 7.0192631 | 9.9876595 | FEM1B    | 0.702793591 |
| 10085 | 21.38203  | 30.436055 | PDRG1    | 0.702523033 |
| 10086 | 17.823134 | 25.370703 | IDH3A    | 0.702508482 |
| 10087 | 3.4362055 | 4.8925355 | ATP6V0A2 | 0.702336341 |
| 10088 | 11.411463 | 16.252886 | HDAC2    | 0.702119168 |
| 10089 | 3.0256677 | 4.312282  | C1orf27  | 0.701639579 |
| 10090 | 19.409757 | 27.66343  | NUDT1    | 0.701639579 |
| 10091 | 7.5229712 | 10.721988 | NUP107   | 0.701639579 |
| 10092 | 2.5745062 | 3.6692716 | PLEKHH3  | 0.701639579 |
| 10093 | 10.730598 | 15.293604 | S100A3   | 0.701639579 |
| 10094 | 4.2821815 | 6.1031071 | PEX3     | 0.701639578 |
| 10095 | 1.0502893 | 1.4969071 | GRAMD1C  | 0.701639578 |
| 10096 | 26.591034 | 37.902359 | CRTC2    | 0.701566742 |
| 10097 | 4.7323191 | 6.7506801 | PAPD4    | 0.701013674 |
| 10098 | 12.462614 | 17.782044 | XPC      | 0.700853868 |
| 10099 | 4.1034117 | 5.8551666 | TBK1     | 0.700818948 |
| 10100 | 13.41013  | 19.139071 | TP53BP2  | 0.700667779 |
| 10101 | 10.86843  | 15.511531 | METTL3   | 0.700667778 |
| 10102 | 3.9790389 | 5.6797229 | CREB1    | 0.70056919  |
| 10103 | 7.2745836 | 10.38561  | FAM175B  | 0.70044834  |

|       |           |           |           |             |
|-------|-----------|-----------|-----------|-------------|
| 10104 | 8.677663  | 12.391849 | GCLM      | 0.70027186  |
| 10105 | 97.258743 | 138.9223  | SLC39A1   | 0.700094548 |
| 10106 | 6.9892862 | 9.984615  | SUV420H1  | 0.700005579 |
| 10107 | 3.4759583 | 4.9661145 | METTL10   | 0.699935191 |
| 10108 | 3.7426849 | 5.3471878 | APLP1     | 0.699935191 |
| 10109 | 9.6809556 | 13.832093 | TRAK1     | 0.69989088  |
| 10110 | 35.548704 | 50.793606 | AKIRIN1   | 0.699865726 |
| 10111 | 1.5587605 | 2.2284965 | ZNF227    | 0.69946732  |
| 10112 | 2.6228118 | 3.7497274 | SLC19A2   | 0.69946732  |
| 10113 | 25.155403 | 35.968216 | API5      | 0.699378656 |
| 10114 | 8.8077153 | 12.59674  | TMEM164   | 0.699205902 |
| 10115 | 29.993366 | 42.909702 | XAB2      | 0.698987977 |
| 10116 | 1.5697462 | 2.2468425 | DOCK11    | 0.698645384 |
| 10117 | 1.2857817 | 1.8403925 | OPLAH     | 0.698645384 |
| 10118 | 4.5454336 | 6.5105185 | RELL1     | 0.698167678 |
| 10119 | 43.920452 | 62.92137  | CYFIP1    | 0.698021234 |
| 10120 | 281.42501 | 403.22318 | RPS3A     | 0.697938566 |
| 10121 | 13.569739 | 19.445919 | ATP6V0A1  | 0.6978194   |
| 10122 | 23.519492 | 33.713163 | STT3B     | 0.697635294 |
| 10123 | 6.2841364 | 9.0102912 | TTC37     | 0.697439878 |
| 10124 | 5.4916724 | 7.875109  | RASA1     | 0.697345579 |
| 10125 | 4.4598525 | 6.3964814 | WDR81     | 0.697235274 |
| 10126 | 46.144071 | 66.213968 | NDUFS3    | 0.696893295 |
| 10127 | 22.40659  | 32.152519 | ADK       | 0.696884415 |
| 10128 | 3.5006147 | 5.0236797 | CD274     | 0.696822831 |
| 10129 | 11.39415  | 16.362346 | PRDM4     | 0.696364093 |
| 10130 | 3.6874979 | 5.295359  | LOC645212 | 0.696364093 |
| 10131 | 30.698213 | 44.091224 | ANLN      | 0.696243165 |
| 10132 | 6.0827809 | 8.7413352 | MNT       | 0.695864047 |
| 10133 | 3.5606939 | 5.1176126 | CNNM2     | 0.69577245  |
| 10134 | 5.0661858 | 7.2815925 | NFAT5     | 0.695752443 |
| 10135 | 4.2666314 | 6.1327482 | STK17B    | 0.695712799 |
| 10136 | 3.0073251 | 4.3233743 | RBMXL1    | 0.69559675  |
| 10137 | 3.3079286 | 4.7555262 | HEY1      | 0.69559675  |
| 10138 | 12.532807 | 18.020244 | RBM6      | 0.695484846 |
| 10139 | 5.8638882 | 8.4320277 | MIS12     | 0.695430379 |
| 10140 | 242.09622 | 348.19769 | TUBB6     | 0.695283811 |
| 10141 | 6.3357637 | 9.1152293 | THUMPD3   | 0.69507453  |
| 10142 | 5.6065482 | 8.0672039 | MTO1      | 0.694980359 |
| 10143 | 18.89089  | 27.18721  | PRPF38A   | 0.694844753 |
| 10144 | 8.2495561 | 11.872517 | SPRYD4    | 0.694844753 |
| 10145 | 3.9730341 | 5.7189369 | TMEM192   | 0.694715504 |
| 10146 | 16.497699 | 23.760267 | DDX19A    | 0.694339779 |

|       |           |           |              |             |
|-------|-----------|-----------|--------------|-------------|
| 10147 | 9.4961702 | 13.6774   | HERC2        | 0.694296467 |
| 10148 | 6.6115737 | 9.5260556 | FRA10AC1     | 0.694051551 |
| 10149 | 1020.448  | 1470.3081 | RPS14        | 0.694036861 |
| 10150 | 8.4959029 | 12.244314 | C20orf24     | 0.693865179 |
| 10151 | 31.266606 | 45.099508 | KLF6         | 0.693280428 |
| 10152 | 188.94702 | 272.55149 | TRIM28       | 0.693252575 |
| 10153 | 3.327624  | 4.800057  | POGLUT1      | 0.693246761 |
| 10154 | 6.7152215 | 9.6866251 | PVRL1        | 0.693246761 |
| 10155 | 29.910389 | 43.170896 | CAV1         | 0.692836879 |
| 10156 | 0.7615694 | 1.0992999 | KCNQ1OT1     | 0.692776763 |
| 10157 | 78.668219 | 113.55868 | FXD5         | 0.692753937 |
| 10158 | 7.4155761 | 10.704922 | DDX52        | 0.692725827 |
| 10159 | 21.653242 | 31.261709 | DDAH1        | 0.692644199 |
| 10160 | 39.878917 | 57.585099 | SNHG1        | 0.692521455 |
| 10161 | 66.953052 | 96.687645 | TYMS         | 0.692467506 |
| 10162 | 41.838681 | 60.425964 | ANAPC5       | 0.692395748 |
| 10163 | 17.174291 | 24.815989 | ANAPC7       | 0.692065549 |
| 10164 | 4.3836452 | 6.3349178 | SGOL1        | 0.691981382 |
| 10165 | 37.851715 | 54.702873 | COMMD4       | 0.691951139 |
| 10166 | 38.973795 | 56.325298 | EXOSC10      | 0.691941211 |
| 10167 | 8.2526819 | 11.934736 | CDR2         | 0.691484269 |
| 10168 | 3.7942397 | 5.4870947 | CEP68        | 0.691484269 |
| 10169 | 7.1304991 | 10.314629 | SAMD4A       | 0.691299627 |
| 10170 | 16.092112 | 23.280255 | CHPT1        | 0.691234339 |
| 10171 | 4.559765  | 6.5971377 | CLCN6        | 0.691173241 |
| 10172 | 11.748011 | 17.007364 | GPRC5A       | 0.690760258 |
| 10173 | 28.867652 | 41.791666 | COPS8        | 0.690751412 |
| 10174 | 107.80414 | 156.07282 | CERS2        | 0.690729768 |
| 10175 | 85.14085  | 123.31122 | PPT1         | 0.690454998 |
| 10176 | 156.04842 | 226.13396 | VDAC1        | 0.69007069  |
| 10177 | 0.0742692 | 0.1077412 | ZNF662       | 0.689330117 |
| 10178 | 0.13169   | 0.1910406 | LOC100507584 | 0.689330116 |
| 10179 | 0.1617381 | 0.2346308 | C1orf220     | 0.689330115 |
| 10180 | 0.1421067 | 0.2061519 | CCL22        | 0.689330115 |
| 10181 | 0.0598849 | 0.0868741 | LONRF2       | 0.689330115 |
| 10182 | 0.2072596 | 0.3006681 | FAM83E       | 0.689330114 |
| 10183 | 0.0797549 | 0.1156991 | ITGAL        | 0.689330114 |
| 10184 | 0.1991395 | 0.2888885 | ZC2HC1C      | 0.689330114 |
| 10185 | 0.3143281 | 0.4559906 | TTC30B       | 0.689330114 |
| 10186 | 0.155871  | 0.2261195 | PCSK4        | 0.689330114 |
| 10187 | 0.1868216 | 0.2710191 | LINC00470    | 0.689330114 |
| 10188 | 0.1344947 | 0.1951092 | C17orf107    | 0.689330114 |
| 10189 | 0.1195294 | 0.1733994 | SALL4        | 0.689330114 |

|       |           |           |              |             |
|-------|-----------|-----------|--------------|-------------|
| 10190 | 0.1650036 | 0.239368  | SEC14L4      | 0.689330113 |
| 10191 | 0.084492  | 0.1225712 | SYNPO2L      | 0.689330113 |
| 10192 | 0.2092364 | 0.3035359 | IAPP         | 0.689330113 |
| 10193 | 0.2131964 | 0.3092806 | RHBG         | 0.689330113 |
| 10194 | 0.260608  | 0.3780597 | TSG1         | 0.689330113 |
| 10195 | 0.0991434 | 0.1438258 | LOC728377    | 0.689330113 |
| 10196 | 0.0641229 | 0.0930221 | CDHR3        | 0.689330113 |
| 10197 | 0.2683831 | 0.389339  | FAM186B      | 0.689330113 |
| 10198 | 0.197348  | 0.2862896 | LOC100287792 | 0.689330113 |
| 10199 | 0.1624314 | 0.2356366 | LINC00574    | 0.689330113 |
| 10200 | 0.4220037 | 0.6121939 | NEK11        | 0.689330113 |
| 10201 | 0.2916718 | 0.4231235 | DNAJC9-AS1   | 0.689330113 |
| 10202 | 0.736394  | 1.0682748 | RPS26P11     | 0.689330113 |
| 10203 | 0.3691754 | 0.5355567 | C1orf229     | 0.689330113 |
| 10204 | 0.2884422 | 0.4184384 | LINC00862    | 0.689330113 |
| 10205 | 0.3490779 | 0.5064016 | LOC254100    | 0.689330113 |
| 10206 | 0.7258777 | 1.0530191 | B3GALT5      | 0.689330113 |
| 10207 | 0.1312753 | 0.1904389 | ASB14        | 0.689330113 |
| 10208 | 0.925192  | 1.342161  | OAZ3         | 0.689330113 |
| 10209 | 0.9353658 | 1.35692   | ZNF256       | 0.689330113 |
| 10210 | 0.696406  | 1.0102649 | TDRG1        | 0.689330113 |
| 10211 | 0.3990416 | 0.5788832 | PLSCR3       | 0.689330113 |
| 10212 | 0.4434032 | 0.6432378 | TMED6        | 0.689330113 |
| 10213 | 0.6337542 | 0.9193769 | GRASP        | 0.689330113 |
| 10214 | 13.695022 | 19.867146 | BRAT1        | 0.689330113 |
| 10215 | 1.9805655 | 2.8731742 | EIF4A1       | 0.689330113 |
| 10216 | 1.2672943 | 1.8384432 | ZBTB49       | 0.689330113 |
| 10217 | 1.0992501 | 1.5946643 | LOC202781    | 0.689330113 |
| 10218 | 1.0742242 | 1.5583596 | KRTAP2-1     | 0.689330112 |
| 10219 | 1.5174721 | 2.2013721 | GDPD1        | 0.689330112 |
| 10220 | 1.1545679 | 1.6749129 | RNASE4       | 0.689330112 |
| 10221 | 0.2510837 | 0.3642431 | TLR8-AS1     | 0.689330112 |
| 10222 | 0.4214348 | 0.6113686 | ZNF14        | 0.689330112 |
| 10223 | 0.3213562 | 0.4661862 | LOC100506804 | 0.689330112 |
| 10224 | 1.23496   | 1.7915364 | TMEM81       | 0.689330112 |
| 10225 | 0.1747585 | 0.2535193 | AGAP8        | 0.689330112 |
| 10226 | 22.339916 | 32.408153 | ZNF593       | 0.689330112 |
| 10227 | 4.3231606 | 6.2715389 | FGF5         | 0.689330112 |
| 10228 | 6.414327  | 9.30516   | FNDC3A       | 0.689330112 |
| 10229 | 2.1374308 | 3.1007361 | RPP21        | 0.689330112 |
| 10230 | 0.2676077 | 0.3882142 | SLC25A5-AS1  | 0.689330112 |
| 10231 | 0.6237172 | 0.9048164 | LOC100527964 | 0.689330112 |
| 10232 | 4.6011737 | 6.6748479 | BCL7A        | 0.689330112 |

|       |           |           |              |             |
|-------|-----------|-----------|--------------|-------------|
| 10233 | 1.3097734 | 1.900067  | ZNF627       | 0.689330112 |
| 10234 | 28.915978 | 41.94794  | C21orf59     | 0.689330112 |
| 10235 | 1.6184274 | 2.3478263 | BBS7         | 0.689330112 |
| 10236 | 3.6142583 | 5.2431459 | ITSN2        | 0.689330112 |
| 10237 | 2.0336168 | 2.9501348 | SCAND2P      | 0.689330112 |
| 10238 | 0.1471228 | 0.2134287 | SIRPB2       | 0.689330112 |
| 10239 | 4.2675666 | 6.1908895 | TMEM186      | 0.689330112 |
| 10240 | 0.5397552 | 0.7830142 | ZNF431       | 0.689330112 |
| 10241 | 4.7628835 | 6.9094377 | RNGTT        | 0.689330112 |
| 10242 | 1.4820984 | 2.1500561 | KDM8         | 0.689330112 |
| 10243 | 2.8436579 | 4.1252483 | TARBP1       | 0.689330112 |
| 10244 | 0.8948986 | 1.2982148 | LURAP1       | 0.689330112 |
| 10245 | 2.998554  | 4.3499535 | SNORA8       | 0.689330112 |
| 10246 | 0.1313166 | 0.1904989 | ABCA10       | 0.689330112 |
| 10247 | 1.6694219 | 2.4218032 | SLC9A5       | 0.689330112 |
| 10248 | 2.8353673 | 4.1132214 | SNORA12      | 0.689330112 |
| 10249 | 1.0767218 | 1.5619828 | FAM161A      | 0.689330112 |
| 10250 | 0.339828  | 0.4929829 | GOLGA2P5     | 0.689330112 |
| 10251 | 0.147383  | 0.2138061 | HSP90AB4P    | 0.689330112 |
| 10252 | 0.1986649 | 0.2882    | NANOG        | 0.689330112 |
| 10253 | 1.1746332 | 1.7040213 | LINC00507    | 0.689330112 |
| 10254 | 0.244744  | 0.3550461 | TDO2         | 0.689330112 |
| 10255 | 1.2181169 | 1.7671024 | FLJ35946     | 0.689330112 |
| 10256 | 1.0372435 | 1.5047123 | MCM9         | 0.689330112 |
| 10257 | 0.311509  | 0.451901  | NNAT         | 0.689330112 |
| 10258 | 0.7320826 | 1.0620203 | DUSP2        | 0.689330112 |
| 10259 | 0.261973  | 0.3800399 | LOC100130557 | 0.689330112 |
| 10260 | 0.8859985 | 1.2853036 | ZNF75D       | 0.689330112 |
| 10261 | 0.3611776 | 0.5239545 | ZBED3-AS1    | 0.689330112 |
| 10262 | 0.1809023 | 0.2624321 | LOC158572    | 0.689330112 |
| 10263 | 0.791641  | 1.1484208 | TMEM9B-AS1   | 0.689330112 |
| 10264 | 0.2272623 | 0.3296857 | GPR135       | 0.689330112 |
| 10265 | 0.3238531 | 0.4698085 | C16orf86     | 0.689330111 |
| 10266 | 0.2083995 | 0.3023218 | FOXE3        | 0.689330111 |
| 10267 | 0.1258831 | 0.1826166 | RASIP1       | 0.689330111 |
| 10268 | 0.209763  | 0.3042997 | SULT2A1      | 0.689330111 |
| 10269 | 0.0569475 | 0.0826129 | LOC440970    | 0.689330111 |
| 10270 | 0.1981926 | 0.2875148 | C2orf83      | 0.689330111 |
| 10271 | 0.1067347 | 0.1548383 | WNT4         | 0.68933011  |
| 10272 | 0.2590423 | 0.3757884 | SULT1A1      | 0.68933011  |
| 10273 | 0.0553444 | 0.0802873 | IYD          | 0.68933011  |
| 10274 | 0.0688355 | 0.0998586 | KDR          | 0.68933011  |
| 10275 | 0.1605543 | 0.2329135 | ZNF385C      | 0.68933011  |

|       |           |           |           |             |
|-------|-----------|-----------|-----------|-------------|
| 10276 | 0.1665198 | 0.2415675 | C15orf62  | 0.689330109 |
| 10277 | 0.0599107 | 0.0869115 | MTUS2     | 0.689330107 |
| 10278 | 1317.9012 | 1912.617  | RPS15     | 0.689056514 |
| 10279 | 82.169669 | 119.26343 | SNRPA     | 0.688976247 |
| 10280 | 9.7423155 | 14.14788  | C20orf112 | 0.688606026 |
| 10281 | 64.829217 | 94.181237 | MRPL20    | 0.688345355 |
| 10282 | 12.073373 | 17.543406 | PSMD5     | 0.688200063 |
| 10283 | 15.916174 | 23.134344 | EEFSEC    | 0.687989003 |
| 10284 | 4.6492943 | 6.7587955 | BCORL1    | 0.687887999 |
| 10285 | 20.304918 | 29.519634 | CTBP2     | 0.687844487 |
| 10286 | 1029.9289 | 1498.7907 | RPL8      | 0.68717326  |
| 10287 | 3.7700021 | 5.487875  | ZKSCAN8   | 0.686969393 |
| 10288 | 106.27996 | 154.72729 | PLK1      | 0.68688568  |
| 10289 | 50.637422 | 73.724081 | PSMG1     | 0.686850508 |
| 10290 | 7.7304297 | 11.25891  | GTF2I     | 0.686605487 |
| 10291 | 12.57069  | 18.310877 | TEAD1     | 0.686514878 |
| 10292 | 3.9458531 | 5.7477413 | DCUN1D4   | 0.686504989 |
| 10293 | 37.196793 | 54.19642  | CD320     | 0.686333025 |
| 10294 | 5.0451783 | 7.351487  | ZNF219    | 0.686279979 |
| 10295 | 14.434597 | 21.036981 | SLC35G2   | 0.686153476 |
| 10296 | 2.9463091 | 4.2942293 | NPHP4     | 0.686108944 |
| 10297 | 43.533988 | 63.476813 | WLS       | 0.685825044 |
| 10298 | 4.5502074 | 6.6347629 | PLEKHF2   | 0.685813122 |
| 10299 | 30.041726 | 43.812735 | GCN1L1    | 0.685684792 |
| 10300 | 9.9449271 | 14.512819 | GLT8D1    | 0.685251236 |
| 10301 | 15.107278 | 22.046334 | SAAL1     | 0.685251236 |
| 10302 | 11.853126 | 17.29935  | SNRNP35   | 0.685177521 |
| 10303 | 21.106726 | 30.808895 | CEP55     | 0.685085469 |
| 10304 | 5.541384  | 8.0913369 | CRIP1     | 0.684853943 |
| 10305 | 2.2517743 | 3.2879628 | FAM172A   | 0.684853943 |
| 10306 | 9.5543155 | 13.953313 | SNX33     | 0.684734578 |
| 10307 | 19.785702 | 28.900252 | PAFAH1B1  | 0.684620404 |
| 10308 | 4.1264371 | 6.0280165 | PCGF5     | 0.684543098 |
| 10309 | 1.5970612 | 2.3332622 | IPMK      | 0.684475675 |
| 10310 | 62.606711 | 91.501043 | ELOVL5    | 0.684218554 |
| 10311 | 12.099216 | 17.683318 | GIN5      | 0.684216388 |
| 10312 | 13.493231 | 19.732695 | SMCR7L    | 0.683800726 |
| 10313 | 1.3681953 | 2.0009554 | ATAD5     | 0.683770998 |
| 10314 | 45.345926 | 66.32806  | PSMF1     | 0.683661279 |
| 10315 | 2.3823893 | 3.4848942 | GCC2      | 0.683633169 |
| 10316 | 2.9019948 | 4.244959  | RNF8      | 0.683633169 |
| 10317 | 16.644646 | 24.352494 | USP19     | 0.683488332 |
| 10318 | 10.198133 | 14.922354 | DGKD      | 0.683413116 |



|       |           |           |          |             |
|-------|-----------|-----------|----------|-------------|
| 10319 | 7.7921018 | 11.405029 | PRDM2    | 0.68321632  |
| 10320 | 2.3316545 | 3.4129663 | ZFP1     | 0.683175379 |
| 10321 | 97.329437 | 142.48621 | UQCRH    | 0.68307971  |
| 10322 | 23.760288 | 34.78909  | YME1L1   | 0.682981019 |
| 10323 | 10.772341 | 15.77331  | CHMP5    | 0.682947426 |
| 10324 | 8.8011322 | 12.887303 | IDE      | 0.682930496 |
| 10325 | 12.898611 | 18.887778 | TIMELESS | 0.682907782 |
| 10326 | 37.244952 | 54.551174 | EHD4     | 0.682752535 |
| 10327 | 4.1237425 | 6.0404677 | HELZ     | 0.682685967 |
| 10328 | 9.6881651 | 14.19521  | SREBF1   | 0.682495394 |
| 10329 | 7.8061107 | 11.438584 | CHMP2B   | 0.682436811 |
| 10330 | 4.7211786 | 6.9181183 | S100PBP  | 0.682436811 |
| 10331 | 6.8248596 | 10.00072  | GPD2     | 0.682436811 |
| 10332 | 15.079694 | 22.102326 | PKMYT1   | 0.682267304 |
| 10333 | 5.550272  | 8.1368926 | RAD54L2  | 0.682111996 |
| 10334 | 105.63088 | 154.88471 | DBN1     | 0.681996813 |
| 10335 | 1.502415  | 2.2029648 | MBLAC2   | 0.681996813 |
| 10336 | 1.6786106 | 2.4621901 | AGL      | 0.681755056 |
| 10337 | 26.990368 | 39.609245 | FADS1    | 0.681415875 |
| 10338 | 6.6812142 | 9.8050304 | CUL4B    | 0.681406778 |
| 10339 | 2.9812452 | 4.375427  | UBR3     | 0.681360978 |
| 10340 | 2.346275  | 3.4442234 | ASB7     | 0.681220346 |
| 10341 | 45.736532 | 67.139879 | IARS     | 0.681212603 |
| 10342 | 26.022136 | 38.215938 | SRSF11   | 0.680923647 |
| 10343 | 93.89428  | 137.90893 | GLRX3    | 0.680842643 |
| 10344 | 2.7969545 | 4.1085342 | UBR2     | 0.680767005 |
| 10345 | 51.131476 | 75.149625 | WBP11    | 0.680395624 |
| 10346 | 219.47956 | 322.61335 | RANBP1   | 0.680317669 |
| 10347 | 2.3457846 | 3.4483648 | ING3     | 0.680259979 |
| 10348 | 5.4223154 | 7.9730862 | LATS1    | 0.680077359 |
| 10349 | 82.68391  | 121.58238 | POLR2L   | 0.680064923 |
| 10350 | 11.079235 | 16.293851 | C19orf25 | 0.679964214 |
| 10351 | 9.7152755 | 14.292296 | SOGA2    | 0.679756083 |
| 10352 | 7.0086539 | 10.3119   | TNKS2    | 0.679666606 |
| 10353 | 52.789741 | 77.683525 | ABCF1    | 0.679548729 |
| 10354 | 5.4592124 | 8.0343675 | PSMC3IP  | 0.679482539 |
| 10355 | 9.03158   | 13.29185  | TFCP2    | 0.679482539 |
| 10356 | 22.573886 | 33.222173 | TRAPPC2L | 0.679482539 |
| 10357 | 32.57661  | 47.9719   | DDX47    | 0.679076918 |
| 10358 | 4.408451  | 6.4921662 | WDR44    | 0.679041603 |
| 10359 | 128.38618 | 189.08722 | PRPF8    | 0.678978603 |
| 10360 | 6.4859893 | 9.5526136 | CNNM3    | 0.678975368 |
| 10361 | 19.612543 | 28.891246 | NCOA5    | 0.678840306 |

|       |           |           |         |             |
|-------|-----------|-----------|---------|-------------|
| 10362 | 10.328131 | 15.217483 | PARD3   | 0.678701674 |
| 10363 | 11.121627 | 16.387377 | DLD     | 0.678670368 |
| 10364 | 4.1403874 | 6.1017324 | ALG14   | 0.678559329 |
| 10365 | 3.08305   | 4.5435231 | ZNF274  | 0.678559329 |
| 10366 | 2.0770714 | 3.061002  | CTU1    | 0.678559329 |
| 10367 | 24.01585  | 35.395195 | CCDC47  | 0.67850592  |
| 10368 | 3.8723678 | 5.7089238 | C9orf91 | 0.678300831 |
| 10369 | 15.25208  | 22.48975  | COA1    | 0.678179184 |
| 10370 | 6.8943169 | 10.166514 | HNRPLL  | 0.678139688 |
| 10371 | 43.111922 | 63.590223 | DHX30   | 0.677964623 |
| 10372 | 96.162304 | 141.86081 | MRPL21  | 0.67786376  |
| 10373 | 17.611225 | 25.980883 | DOT1L   | 0.677853232 |
| 10374 | 8.4621958 | 12.484037 | MAPKBP1 | 0.677841277 |
| 10375 | 7.997986  | 11.799202 | DNM1L   | 0.677841277 |
| 10376 | 34.098385 | 50.327543 | ITGB5   | 0.677529302 |
| 10377 | 10.696778 | 15.789881 | PCK2    | 0.67744511  |
| 10378 | 1.0271311 | 1.5161835 | CA13    | 0.67744511  |
| 10379 | 211.83366 | 312.72255 | SNRPB   | 0.67738532  |
| 10380 | 2.7076213 | 3.9982948 | ZFC3H1  | 0.677194019 |
| 10381 | 20.738512 | 30.630041 | ATPAF1  | 0.677064452 |
| 10382 | 22.801079 | 33.677    | ASXL1   | 0.677051968 |
| 10383 | 4.7629223 | 7.0351212 | ZFP41   | 0.677020646 |
| 10384 | 9.8159185 | 14.500596 | RIPK1   | 0.676932089 |
| 10385 | 3.420279  | 5.0536274 | ACER3   | 0.676796837 |
| 10386 | 20.798353 | 30.735041 | ARMC6   | 0.676698409 |
| 10387 | 5.3852626 | 7.9597151 | KATNA1  | 0.67656474  |
| 10388 | 4.2144447 | 6.2296186 | TECPR2  | 0.676517285 |
| 10389 | 12.246515 | 18.102294 | PRUNE   | 0.676517285 |
| 10390 | 1803.9033 | 2666.6853 | RPL41   | 0.676458985 |
| 10391 | 1566.127  | 2315.6294 | EEF1A1  | 0.676328857 |
| 10392 | 0.7517062 | 1.1118702 | CYP4V2  | 0.676073764 |
| 10393 | 36.457298 | 53.925029 | PSMD6   | 0.676073764 |
| 10394 | 6.6627831 | 9.8576228 | DDHD2   | 0.675901604 |
| 10395 | 17.63158  | 26.090336 | ABI2    | 0.675789699 |
| 10396 | 85.426155 | 126.48529 | RTFDC1  | 0.675384127 |
| 10397 | 30.358653 | 44.958321 | COPS7B  | 0.675262151 |
| 10398 | 8.1942418 | 12.137136 | ABHD10  | 0.675138022 |
| 10399 | 13.379031 | 19.816735 | EXOSC6  | 0.675138022 |
| 10400 | 7.4541678 | 11.043718 | VPS33A  | 0.674969068 |
| 10401 | 18.870821 | 27.970715 | ENOPH1  | 0.674663514 |
| 10402 | 11.864328 | 17.585549 | ELP3    | 0.674663514 |
| 10403 | 28.072639 | 41.613703 | MAGEF1  | 0.674600836 |
| 10404 | 0.9542102 | 1.4150185 | TTC39B  | 0.674344675 |

|       |           |           |          |             |
|-------|-----------|-----------|----------|-------------|
| 10405 | 9.7322307 | 14.432131 | HMOX1    | 0.674344675 |
| 10406 | 2.5031971 | 3.712044  | C1GALT1  | 0.674344675 |
| 10407 | 28.529022 | 42.354696 | QRICH1   | 0.673573995 |
| 10408 | 2.1020123 | 3.1219587 | TRHDE    | 0.67329918  |
| 10409 | 19.980711 | 29.678184 | SRSF10   | 0.673245743 |
| 10410 | 26.952658 | 40.035185 | LMAN1    | 0.673224269 |
| 10411 | 6.8804464 | 10.221453 | CASP8    | 0.673137794 |
| 10412 | 4.063592  | 6.0387671 | YTHDC2   | 0.672917491 |
| 10413 | 13.532435 | 20.118858 | ADAM10   | 0.672624408 |
| 10414 | 344.40554 | 512.17309 | RPS27A   | 0.672439747 |
| 10415 | 18.905207 | 28.120469 | PCCB     | 0.672293437 |
| 10416 | 53.312448 | 79.310438 | TCOF1    | 0.672199642 |
| 10417 | 0.9727804 | 1.4473813 | SLC25A35 | 0.67209686  |
| 10418 | 1.455773  | 2.1660166 | KRT15    | 0.67209686  |
| 10419 | 3.3654578 | 5.0073999 | EMC6     | 0.67209686  |
| 10420 | 1.4853035 | 2.2099545 | CRLF1    | 0.67209686  |
| 10421 | 4.7100026 | 7.0079224 | C2orf43  | 0.67209686  |
| 10422 | 1.4679997 | 2.1842086 | CAB39L   | 0.672096859 |
| 10423 | 43.362896 | 64.525207 | HNRNPH3  | 0.672030322 |
| 10424 | 105.30434 | 156.75944 | HNRNPM   | 0.671757588 |
| 10425 | 8.1995625 | 12.210768 | CHST10   | 0.671502609 |
| 10426 | 3.9625827 | 5.9048748 | C1orf21  | 0.671069712 |
| 10427 | 4.0770909 | 6.0761699 | PABPN1   | 0.670996865 |
| 10428 | 7.6401023 | 11.387245 | KHNYN    | 0.670935067 |
| 10429 | 4.9422806 | 7.3688442 | IL31RA   | 0.670699569 |
| 10430 | 6.7749245 | 10.101281 | TTC27    | 0.670699569 |
| 10431 | 19.329809 | 28.820368 | CCDC12   | 0.670699569 |
| 10432 | 0.8734873 | 1.3023525 | TBC1D8B  | 0.670699569 |
| 10433 | 0.6028915 | 0.8988995 | ZNF518A  | 0.670699568 |
| 10434 | 7.2634353 | 10.832376 | MKKS     | 0.6705302   |
| 10435 | 50.986466 | 76.044582 | C11orf48 | 0.670481242 |
| 10436 | 44.740585 | 66.742692 | RAB12    | 0.670344325 |
| 10437 | 3.7433834 | 5.5856216 | C2orf44  | 0.670182054 |
| 10438 | 4.7683477 | 7.1150035 | INTS7    | 0.670182054 |
| 10439 | 670.60851 | 1000.6811 | RPL27    | 0.670152041 |
| 10440 | 2.5785986 | 3.8487313 | ZNF445   | 0.669986665 |
| 10441 | 35.374085 | 52.804049 | PPIH     | 0.669912363 |
| 10442 | 111.39673 | 166.30892 | CS       | 0.66981814  |
| 10443 | 9.804222  | 14.639104 | DIP2B    | 0.669728308 |
| 10444 | 346.28789 | 517.12934 | RPS12    | 0.669634966 |
| 10445 | 3.753212  | 5.6076    | MYO6     | 0.669308076 |
| 10446 | 14.88151  | 22.237427 | RNF31    | 0.669210071 |
| 10447 | 0.5152606 | 0.7701311 | ESYT3    | 0.669055697 |

|       |           |           |            |             |
|-------|-----------|-----------|------------|-------------|
| 10448 | 7.911629  | 11.825068 | SECISBP2   | 0.669055697 |
| 10449 | 7.4775217 | 11.176232 | TRIT1      | 0.669055697 |
| 10450 | 1.1589457 | 1.732211  | RSBN1L-AS1 | 0.669055697 |
| 10451 | 7.1739231 | 10.72246  | NOL10      | 0.669055697 |
| 10452 | 9.2809494 | 13.871714 | PCNXL4     | 0.669055697 |
| 10453 | 49.0076   | 73.274274 | SMARCA4    | 0.6688241   |
| 10454 | 27.134193 | 40.582028 | CCNA2      | 0.668625851 |
| 10455 | 51.5003   | 77.030098 | SRSF5      | 0.668573738 |
| 10456 | 11.175745 | 16.717896 | SH3BP1     | 0.6684899   |
| 10457 | 56.138625 | 83.97827  | SUMF2      | 0.6684899   |
| 10458 | 1014.5228 | 1517.7579 | EEF2       | 0.668435182 |
| 10459 | 26.790888 | 40.083872 | EIF2AK1    | 0.668370751 |
| 10460 | 22.316797 | 33.390289 | FUBP3      | 0.668361896 |
| 10461 | 2.3732646 | 3.5511224 | FAM21C     | 0.66831395  |
| 10462 | 23.278668 | 34.842048 | PMF1       | 0.668119955 |
| 10463 | 21.346239 | 31.959163 | DVL2       | 0.667922345 |
| 10464 | 1.7001012 | 2.5458675 | GLYCTK     | 0.667788546 |
| 10465 | 18.49788  | 27.700205 | MNAT1      | 0.667788546 |
| 10466 | 36.344254 | 54.43341  | RAD21      | 0.667682847 |
| 10467 | 8.889395  | 13.315862 | STK16      | 0.667579405 |
| 10468 | 3.4653976 | 5.1914835 | ZC4H2      | 0.667515868 |
| 10469 | 88.077153 | 131.95898 | TOMM22     | 0.667458588 |
| 10470 | 6.3466648 | 9.5088725 | RAP2C      | 0.667446617 |
| 10471 | 47.649132 | 71.402629 | TOMM7      | 0.667330215 |
| 10472 | 10.029513 | 15.030938 | SPIRE1     | 0.667257966 |
| 10473 | 4.6605931 | 6.9849224 | PTCD3      | 0.667236198 |
| 10474 | 3.2506551 | 4.8728617 | PHLPP1     | 0.667093657 |
| 10475 | 1.4162385 | 2.1229981 | SLC35A3    | 0.667093657 |
| 10476 | 1.3363225 | 2.0032008 | ZNF184     | 0.667093657 |
| 10477 | 52.099875 | 78.109156 | NDUFB5     | 0.66701367  |
| 10478 | 8.2468561 | 12.369362 | FOXP1      | 0.666716342 |
| 10479 | 4.8609401 | 7.2918903 | TANC2      | 0.666622767 |
| 10480 | 14.018399 | 21.030151 | TARBP2     | 0.666585718 |
| 10481 | 16.741234 | 25.123693 | RBM14      | 0.666352442 |
| 10482 | 3.2562422 | 4.8866666 | TRMT61B    | 0.666352442 |
| 10483 | 6.076333  | 9.1193652 | ABL2       | 0.666310966 |
| 10484 | 35.357323 | 53.073277 | MAPKAP1    | 0.666198229 |
| 10485 | 13.600097 | 20.416535 | SNX6       | 0.666131503 |
| 10486 | 12.37372  | 18.580192 | CMC1       | 0.66596299  |
| 10487 | 31.049882 | 46.633332 | PSMG2      | 0.665830222 |
| 10488 | 4.3726681 | 6.5683004 | KCNN4      | 0.665722917 |
| 10489 | 44.755907 | 67.232197 | PES1       | 0.66569158  |
| 10490 | 0.4413166 | 0.6639223 | ZNF624     | 0.66471118  |

|       |           |           |           |             |
|-------|-----------|-----------|-----------|-------------|
| 10491 | 0.8376934 | 1.2602367 | TMEM198   | 0.66471118  |
| 10492 | 0.7126123 | 1.072063  | THAP7-AS1 | 0.66471118  |
| 10493 | 31.789754 | 47.824913 | MTRNR2L10 | 0.66471118  |
| 10494 | 4.2306665 | 6.3646689 | STEAP1    | 0.66471118  |
| 10495 | 1.0232381 | 1.5393725 | DOK5      | 0.66471118  |
| 10496 | 0.7786862 | 1.1714655 | SORBS1    | 0.66471118  |
| 10497 | 0.7433989 | 1.1183789 | FAM122C   | 0.664711179 |
| 10498 | 9.3988461 | 14.143168 | SEC62     | 0.664550272 |
| 10499 | 10.191193 | 15.337349 | SLC20A2   | 0.664469026 |
| 10500 | 39.425286 | 59.344644 | LMNB1     | 0.664344463 |
| 10501 | 14.733446 | 22.180121 | RDX       | 0.664263563 |
| 10502 | 30.504507 | 45.922294 | RPA1      | 0.664263563 |
| 10503 | 2.7108878 | 4.0816046 | ERCC4     | 0.664172079 |
| 10504 | 28.854357 | 43.455741 | CHAF1A    | 0.663994123 |
| 10505 | 8.8296605 | 13.304422 | RPP30     | 0.663663566 |
| 10506 | 177.64895 | 267.70131 | RPL28     | 0.663608839 |
| 10507 | 4.1753583 | 6.2946588 | SMPD2     | 0.663317655 |
| 10508 | 3.1519497 | 4.7517953 | ZNF134    | 0.663317655 |
| 10509 | 7.636104  | 11.513697 | ZCCHC14   | 0.663219123 |
| 10510 | 3.2858286 | 4.9552116 | C2orf69   | 0.663105597 |
| 10511 | 31.246428 | 47.123558 | SAR1A     | 0.663074464 |
| 10512 | 32.629407 | 49.216065 | IMPDH1    | 0.662982862 |
| 10513 | 2.9720408 | 4.483951  | FANCL     | 0.662817416 |
| 10514 | 1.1897665 | 1.7950139 | PUS7L     | 0.662817416 |
| 10515 | 1.221568  | 1.8429932 | GPR173    | 0.662817415 |
| 10516 | 11.71157  | 17.672589 | SENP3     | 0.662696904 |
| 10517 | 13.753141 | 20.756294 | MFSD1     | 0.662600986 |
| 10518 | 4.5423933 | 6.8558217 | C5orf30   | 0.662560011 |
| 10519 | 0.6154286 | 0.9299919 | NPHP3     | 0.661756908 |
| 10520 | 8.8133709 | 13.31814  | ING2      | 0.661756908 |
| 10521 | 2.6393604 | 3.9884139 | ZNF266    | 0.661756908 |
| 10522 | 1.604616  | 2.4247816 | IRX5      | 0.661756908 |
| 10523 | 12.592367 | 19.03373  | RSAD1     | 0.661581655 |
| 10524 | 7.3852581 | 11.166364 | DIS3L2    | 0.661384297 |
| 10525 | 2.3387008 | 3.5366486 | FAN1      | 0.66127598  |
| 10526 | 42.093084 | 63.686123 | SNRPD1    | 0.660945931 |
| 10527 | 21.744815 | 32.901618 | BET1L     | 0.660904129 |
| 10528 | 77.264143 | 116.92603 | FARSA     | 0.660795052 |
| 10529 | 6.7245731 | 10.176751 | SRGAP2C   | 0.660777978 |
| 10530 | 48.274117 | 73.057731 | IL1B      | 0.66076671  |
| 10531 | 1.3809244 | 2.0903839 | SNX16     | 0.660608025 |
| 10532 | 2.7626447 | 4.1819726 | XRCC4     | 0.660608024 |
| 10533 | 2.7875478 | 4.21967   | MLLT3     | 0.660608024 |

|       |           |           |           |             |
|-------|-----------|-----------|-----------|-------------|
| 10534 | 1.3117648 | 1.9856931 | OFD1      | 0.660608024 |
| 10535 | 7.657863  | 11.594364 | KCTD3     | 0.660481495 |
| 10536 | 2.1451104 | 3.2488777 | FBXO33    | 0.660261975 |
| 10537 | 1.0709121 | 1.6226017 | AGAP2     | 0.659996916 |
| 10538 | 11.26321  | 17.067491 | URI1      | 0.659921831 |
| 10539 | 54.170676 | 82.093706 | QARS      | 0.659863929 |
| 10540 | 13.911184 | 21.088769 | SLC39A9   | 0.659648939 |
| 10541 | 2.1717452 | 3.2924307 | ETNK1     | 0.659617607 |
| 10542 | 34.005131 | 51.557424 | RQCD1     | 0.65955838  |
| 10543 | 10.513528 | 15.941151 | SMOX      | 0.659521242 |
| 10544 | 10.171468 | 15.426291 | SNUPN     | 0.659359238 |
| 10545 | 6.3038995 | 9.5633617 | BROX      | 0.65917192  |
| 10546 | 2.8327224 | 4.2973955 | GOLGB1    | 0.65917192  |
| 10547 | 23.279459 | 35.317628 | MATR3     | 0.659145596 |
| 10548 | 19.926207 | 30.237501 | UTP18     | 0.658989878 |
| 10549 | 5.7839315 | 8.7779165 | USP32     | 0.65891849  |
| 10550 | 3.8882519 | 5.9017639 | BMP2K     | 0.65882878  |
| 10551 | 67.84028  | 102.98445 | DNMT1     | 0.658742953 |
| 10552 | 38.263949 | 58.133877 | JTB       | 0.658203973 |
| 10553 | 35.444997 | 53.856228 | SNX12     | 0.658141097 |
| 10554 | 0.6636927 | 1.0086562 | C11orf70  | 0.657996926 |
| 10555 | 0.3102502 | 0.4715071 | FAM49A    | 0.657996926 |
| 10556 | 2.3009409 | 3.4968869 | RPL13P5   | 0.657996925 |
| 10557 | 3.9651984 | 6.0261656 | PRKD1     | 0.657996925 |
| 10558 | 2.3378149 | 3.5529268 | TRAPPC13  | 0.657996925 |
| 10559 | 0.813153  | 1.2358006 | FCRLB     | 0.657996925 |
| 10560 | 9.8139522 | 14.914891 | TMEM167A  | 0.657996925 |
| 10561 | 1.9639156 | 2.9846881 | MAGEE1    | 0.657996925 |
| 10562 | 3.9353809 | 5.98085   | PIK3CB    | 0.657996925 |
| 10563 | 6.7622257 | 10.276987 | WDR11     | 0.657996925 |
| 10564 | 0.7698135 | 1.1699347 | ABCA11P   | 0.657996925 |
| 10565 | 0.5518428 | 0.8386708 | LOC441081 | 0.657996925 |
| 10566 | 0.8293329 | 1.2603902 | SMA5      | 0.657996925 |
| 10567 | 0.607073  | 0.9226077 | SLC2A11   | 0.657996925 |
| 10568 | 197.29318 | 300.02871 | PTBP1     | 0.657580998 |
| 10569 | 5.6324189 | 8.5675023 | SLC33A1   | 0.657416681 |
| 10570 | 45.454483 | 69.153534 | RBM22     | 0.657298044 |
| 10571 | 5.2227259 | 7.9461101 | CDKAL1    | 0.657268247 |
| 10572 | 8.9685626 | 13.646619 | SLC23A2   | 0.657200319 |
| 10573 | 6.439033  | 9.7994546 | SMAD2     | 0.65708075  |
| 10574 | 18.164551 | 27.644739 | ILKAP     | 0.657070821 |
| 10575 | 8.8464645 | 13.464574 | CCDC127   | 0.657017763 |
| 10576 | 10.608375 | 16.146253 | ZC3HAV1   | 0.657017763 |

|       |           |           |          |             |
|-------|-----------|-----------|----------|-------------|
| 10577 | 21.856714 | 33.268315 | WNK1     | 0.656982906 |
| 10578 | 5.4655527 | 8.3203337 | CYB5D2   | 0.656891048 |
| 10579 | 6.5797201 | 10.016904 | NR2C2    | 0.656861665 |
| 10580 | 6.7094031 | 10.215499 | GATAD1   | 0.656786631 |
| 10581 | 2.4542161 | 3.7370435 | KLHL13   | 0.656726661 |
| 10582 | 23.011677 | 35.0518   | UBAP1    | 0.656504869 |
| 10583 | 3.9333796 | 5.992236  | N4BP3    | 0.656412663 |
| 10584 | 10.367025 | 15.793934 | ADO      | 0.656392837 |
| 10585 | 17.580857 | 26.787497 | DPH2     | 0.656308311 |
| 10586 | 5.9478586 | 9.0625984 | CSRP2BP  | 0.656308311 |
| 10587 | 27.924689 | 42.550227 | DDX3X    | 0.656275922 |
| 10588 | 61.889569 | 94.304729 | NAP1L1   | 0.656272163 |
| 10589 | 1.8139896 | 2.7664753 | ZBTB43   | 0.655704253 |
| 10590 | 12.749146 | 19.443439 | GMDS     | 0.655704253 |
| 10591 | 27.972747 | 42.66628  | CHERP    | 0.65561719  |
| 10592 | 40.211985 | 61.34626  | MFN2     | 0.655492028 |
| 10593 | 75.221772 | 114.75996 | CCT8     | 0.655470524 |
| 10594 | 2.8656166 | 4.3721261 | MLL3     | 0.655428631 |
| 10595 | 7.1130633 | 10.852905 | PER1     | 0.655406386 |
| 10596 | 2.0647242 | 3.1505718 | IFT80    | 0.65534905  |
| 10597 | 9.1228235 | 13.92362  | RMI2     | 0.655204859 |
| 10598 | 6.0187581 | 9.1860707 | PTPRG    | 0.655204859 |
| 10599 | 16.419501 | 25.0707   | ZNF609   | 0.65492791  |
| 10600 | 98.846707 | 150.93774 | RNPS1    | 0.654883989 |
| 10601 | 10.502893 | 16.03829  | ADORA2B  | 0.654863607 |
| 10602 | 1.5762701 | 2.4070205 | LINS     | 0.654863607 |
| 10603 | 9.8315704 | 15.018844 | FMNL3    | 0.654615646 |
| 10604 | 25.026141 | 38.230282 | KAT7     | 0.654615646 |
| 10605 | 1202.8782 | 1837.6598 | RPL18A   | 0.654570658 |
| 10606 | 9.447444  | 14.434665 | CCNL1    | 0.654496942 |
| 10607 | 5.6815567 | 8.681723  | HSDL1    | 0.654427322 |
| 10608 | 19.001131 | 29.046602 | MPV17L2  | 0.654160209 |
| 10609 | 9.187558  | 14.044813 | TNRC6A   | 0.654160209 |
| 10610 | 3.0985058 | 4.7366161 | LOH12CR1 | 0.654160209 |
| 10611 | 24.192313 | 36.989434 | C3orf37  | 0.654033088 |
| 10612 | 22.758136 | 34.796612 | CDK1     | 0.654033088 |
| 10613 | 18.380886 | 28.106196 | DYNC1LI1 | 0.65397985  |
| 10614 | 32.504878 | 49.709458 | MAP2K1   | 0.653897256 |
| 10615 | 9.87045   | 15.097471 | COG2     | 0.653781698 |
| 10616 | 16.990823 | 25.991963 | TOB2     | 0.653695251 |
| 10617 | 3.4461733 | 5.2719972 | KLHL7    | 0.653675106 |
| 10618 | 10.131744 | 15.500432 | RB1      | 0.653642722 |
| 10619 | 47.465948 | 72.619088 | SLC43A3  | 0.653629085 |

|       |           |           |          |             |
|-------|-----------|-----------|----------|-------------|
| 10620 | 6.4529794 | 9.8727753 | TMEM57   | 0.653613526 |
| 10621 | 67.083744 | 102.63518 | MRPL23   | 0.653613526 |
| 10622 | 2.5226406 | 3.8608884 | KAT6B    | 0.65338345  |
| 10623 | 15.433215 | 23.624294 | KNSTRN   | 0.653277282 |
| 10624 | 7.4541947 | 11.411592 | PHF20    | 0.653212516 |
| 10625 | 1.7711006 | 2.7120461 | DYNC2LI1 | 0.65304958  |
| 10626 | 1.8008465 | 2.7598283 | MAP3K1   | 0.652521223 |
| 10627 | 19.755673 | 30.280065 | RERE     | 0.652431663 |
| 10628 | 15.062189 | 23.102322 | MPI      | 0.651977249 |
| 10629 | 1.5592326 | 2.3919507 | LRRCC1   | 0.651866519 |
| 10630 | 67.81873  | 104.04499 | NCAPD2   | 0.651821218 |
| 10631 | 14.166271 | 21.756972 | DTL      | 0.651114112 |
| 10632 | 38.725013 | 59.475137 | ACIN1    | 0.651112632 |
| 10633 | 0.8326185 | 1.278917  | ZNF780A  | 0.651033995 |
| 10634 | 5.6395917 | 8.6625149 | YIPF6    | 0.651033995 |
| 10635 | 1.7040844 | 2.6175045 | RPL32P3  | 0.651033995 |
| 10636 | 24.058113 | 36.965547 | BTBD6    | 0.650825297 |
| 10637 | 6.6452374 | 10.212384 | CERS6    | 0.650703856 |
| 10638 | 24.094161 | 37.031818 | PICALM   | 0.650634036 |
| 10639 | 5.3780516 | 8.2662481 | POC5     | 0.650603701 |
| 10640 | 573.45959 | 881.59728 | RPL7     | 0.650477953 |
| 10641 | 2.8537853 | 4.3876287 | ZCCHC6   | 0.650416316 |
| 10642 | 15.913031 | 24.465916 | EDC3     | 0.650416316 |
| 10643 | 116.79077 | 179.59908 | KPNA2    | 0.650286024 |
| 10644 | 5.8139524 | 8.940608  | PHF17    | 0.650286024 |
| 10645 | 18.332276 | 28.192184 | PKP4     | 0.650260937 |
| 10646 | 4.9862089 | 7.6691599 | IRAK2    | 0.650163629 |
| 10647 | 117.24982 | 180.38338 | U2AF1    | 0.650003421 |
| 10648 | 122.40603 | 188.33001 | TUFM     | 0.649954955 |
| 10649 | 17.18222  | 26.436632 | MBNL1    | 0.64993982  |
| 10650 | 2.1035967 | 3.2366023 | NAA16    | 0.64993982  |
| 10651 | 4.4657036 | 6.8709493 | TBCCD1   | 0.64993982  |
| 10652 | 13.229979 | 20.355698 | PATZ1    | 0.64993982  |
| 10653 | 11.303179 | 17.393128 | MRPL30   | 0.649864648 |
| 10654 | 10.254476 | 15.786136 | RAB3B    | 0.649587422 |
| 10655 | 17.149959 | 26.402381 | IGF2BP3  | 0.649561067 |
| 10656 | 1.4513249 | 2.2353772 | DACT1    | 0.64925278  |
| 10657 | 38.531647 | 59.357174 | DHFR     | 0.649148953 |
| 10658 | 1.7215865 | 2.652688  | ZKSCAN2  | 0.648996968 |
| 10659 | 3.5462824 | 5.4660676 | NLRX1    | 0.648781282 |
| 10660 | 2.9744799 | 4.5847191 | CAMK1D   | 0.648781282 |
| 10661 | 121.97295 | 188.06639 | HAX1     | 0.648563278 |
| 10662 | 12.90324  | 19.895786 | RWDD2B   | 0.648541348 |



|       |           |           |            |             |
|-------|-----------|-----------|------------|-------------|
| 10663 | 29.940995 | 46.182921 | GTF3C5     | 0.648313134 |
| 10664 | 8.5811559 | 13.238927 | PLGRKT     | 0.648176076 |
| 10665 | 12.69783  | 19.592326 | IDI1       | 0.648102235 |
| 10666 | 4.4340319 | 6.8429554 | NAGPA      | 0.647970306 |
| 10667 | 4.2660176 | 6.5836623 | C3orf52    | 0.647970306 |
| 10668 | 10.203536 | 15.74904  | NUDT15     | 0.647883049 |
| 10669 | 5.4871145 | 8.4692978 | ELF1       | 0.647883049 |
| 10670 | 4.3249983 | 6.6784254 | LINC00094  | 0.6476075   |
| 10671 | 8.3584565 | 12.90667  | SYS1       | 0.6476075   |
| 10672 | 109.30194 | 168.8137  | MCM7       | 0.647470832 |
| 10673 | 3.0202826 | 4.6659863 | SOS2       | 0.647297788 |
| 10674 | 46.851409 | 72.402417 | HSPA4      | 0.647097305 |
| 10675 | 2.7661927 | 4.2766275 | USP31      | 0.646816361 |
| 10676 | 85.266244 | 131.84947 | HK1        | 0.646693866 |
| 10677 | 0.4712788 | 0.729255  | H1FX-AS1   | 0.646246981 |
| 10678 | 0.1518615 | 0.2349898 | DNAH17     | 0.646246981 |
| 10679 | 0.3332259 | 0.5156325 | CYP1A2     | 0.646246981 |
| 10680 | 0.1525395 | 0.2360391 | PECAM1     | 0.646246981 |
| 10681 | 0.7196115 | 1.113524  | PDIK1L     | 0.646246981 |
| 10682 | 1.7124035 | 2.6497663 | IGFLR1     | 0.646246981 |
| 10683 | 15.092299 | 23.353764 | HAUS4      | 0.64624698  |
| 10684 | 16.970643 | 26.260306 | NUP37      | 0.64624698  |
| 10685 | 0.7367411 | 1.1400302 | ZSCAN20    | 0.64624698  |
| 10686 | 1.2053181 | 1.8651044 | RFX8       | 0.64624698  |
| 10687 | 2.2865866 | 3.5382549 | ZNF561     | 0.64624698  |
| 10688 | 2.2123089 | 3.423318  | FLVCR1-AS1 | 0.64624698  |
| 10689 | 46.348049 | 71.718786 | KDM1A      | 0.64624698  |
| 10690 | 3.8674351 | 5.9844536 | AP4M1      | 0.64624698  |
| 10691 | 4.253051  | 6.5811542 | ULBP3      | 0.64624698  |
| 10692 | 14.071169 | 21.773671 | PHLDB1     | 0.64624698  |
| 10693 | 1.2806196 | 1.9816257 | SMIM8      | 0.64624698  |
| 10694 | 4.9089078 | 7.5960244 | SNX21      | 0.64624698  |
| 10695 | 10.812645 | 16.731443 | MEMO1      | 0.64624698  |
| 10696 | 1.2434338 | 1.9240845 | TTC32      | 0.64624698  |
| 10697 | 2.7776019 | 4.2980501 | PWWP2B     | 0.64624698  |
| 10698 | 2.5901927 | 4.0080538 | GLIS1      | 0.64624698  |
| 10699 | 2.7220415 | 4.2120762 | MAFG-AS1   | 0.64624698  |
| 10700 | 1.8690538 | 2.8921664 | LIN9       | 0.64624698  |
| 10701 | 7.1272059 | 11.02861  | MIF4GD     | 0.64624698  |
| 10702 | 0.7589202 | 1.1743502 | CIRBP-AS1  | 0.64624698  |
| 10703 | 0.2417628 | 0.3741027 | FSD1L      | 0.646246979 |
| 10704 | 0.1698724 | 0.2628599 | MYPN       | 0.646246977 |
| 10705 | 18.982654 | 29.386891 | HEG1       | 0.645956532 |

|       |           |           |           |             |
|-------|-----------|-----------|-----------|-------------|
| 10706 | 13.448656 | 20.831546 | ZNF330    | 0.645590892 |
| 10707 | 12.150069 | 18.821998 | SP1       | 0.645524916 |
| 10708 | 5.3376903 | 8.2706222 | BMPR1A    | 0.645379535 |
| 10709 | 20.365571 | 31.561064 | RAB5A     | 0.64527518  |
| 10710 | 22.560945 | 34.966663 | GSTM4     | 0.645212985 |
| 10711 | 11.63883  | 18.039211 | OGT       | 0.645196172 |
| 10712 | 3.0000424 | 4.6522586 | CLSTN3    | 0.644857202 |
| 10713 | 6.2435478 | 9.6830005 | WDR48     | 0.64479474  |
| 10714 | 61.993209 | 96.189983 | MANBAL    | 0.644487155 |
| 10715 | 10.710344 | 16.619181 | PDDC1     | 0.644456822 |
| 10716 | 36.924216 | 57.304652 | PRPS1     | 0.644349355 |
| 10717 | 38.650534 | 59.984478 | TIMMDC1   | 0.644342252 |
| 10718 | 23.080075 | 35.82656  | MCMBP     | 0.644216885 |
| 10719 | 8.7302032 | 13.555255 | PUM2      | 0.644045652 |
| 10720 | 6.4186339 | 9.9663389 | CHUK      | 0.644031276 |
| 10721 | 2.3363966 | 3.6290253 | AASS      | 0.643808313 |
| 10722 | 5.0306171 | 7.81626   | FOXD2-AS1 | 0.643609237 |
| 10723 | 14.093887 | 21.900716 | SIAH2     | 0.643535455 |
| 10724 | 10.979129 | 17.061382 | ZC3H4     | 0.64350759  |
| 10725 | 2.2431225 | 3.4858321 | MAP3K2    | 0.643496993 |
| 10726 | 2.060447  | 3.2025611 | FBXO36    | 0.643374772 |
| 10727 | 85.018702 | 132.15924 | ATP5D     | 0.643305037 |
| 10728 | 1.5814714 | 2.4585979 | VPS13B    | 0.64324118  |
| 10729 | 5.4333779 | 8.4519044 | IREB2     | 0.642858419 |
| 10730 | 2.4669009 | 3.8380187 | MUT       | 0.642753753 |
| 10731 | 0.4358237 | 0.678057  | RORA      | 0.642753753 |
| 10732 | 17.334042 | 26.973883 | PSMC6     | 0.642623166 |
| 10733 | 28.850809 | 44.898572 | PARL      | 0.642577439 |
| 10734 | 9.2046708 | 14.326728 | ADM       | 0.642482435 |
| 10735 | 7.8226205 | 12.175618 | KDEL3     | 0.642482435 |
| 10736 | 1.5067382 | 2.3466604 | SPEG      | 0.642077645 |
| 10737 | 27.5354   | 42.888485 | NDUFAF2   | 0.642023144 |
| 10738 | 521.73302 | 812.64712 | YBX1      | 0.642016701 |
| 10739 | 124.302   | 193.62862 | SSRP1     | 0.641960892 |
| 10740 | 1.7342538 | 2.7022134 | MTERF     | 0.641790105 |
| 10741 | 1.306125  | 2.035128  | OTX1      | 0.641790105 |
| 10742 | 2.4966329 | 3.8901082 | ICAM5     | 0.641790105 |
| 10743 | 17.042015 | 26.572563 | TERF2     | 0.641338775 |
| 10744 | 20.692149 | 32.263992 | KNOP1     | 0.641338775 |
| 10745 | 9.0528152 | 14.115496 | TP53RK    | 0.641338775 |
| 10746 | 15.592733 | 24.314515 | ECD       | 0.64129317  |
| 10747 | 22.105678 | 34.482095 | POLR2D    | 0.641077005 |
| 10748 | 4.3988092 | 6.8615926 | CRNKL1    | 0.641077004 |

|       |           |           |              |             |
|-------|-----------|-----------|--------------|-------------|
| 10749 | 25.960676 | 40.501159 | ITPR3        | 0.640986004 |
| 10750 | 10.109788 | 15.777174 | YAE1D1       | 0.640785738 |
| 10751 | 17.766953 | 27.7285   | CHKA         | 0.640747006 |
| 10752 | 505.14792 | 788.59993 | RPS28        | 0.640562972 |
| 10753 | 80.640314 | 125.93316 | CPNE1        | 0.640342186 |
| 10754 | 3.5930948 | 5.6134016 | PEX13        | 0.640092247 |
| 10755 | 1.0763582 | 1.6815673 | LOC728730    | 0.640092247 |
| 10756 | 111.28655 | 173.87027 | SFPQ         | 0.640055101 |
| 10757 | 12.544518 | 19.607411 | PMEPA1       | 0.639784511 |
| 10758 | 14.647425 | 22.896789 | FAM115A      | 0.639715235 |
| 10759 | 15.349396 | 23.99495  | SLC16A2      | 0.639692751 |
| 10760 | 8.3644547 | 13.080817 | DUS2L        | 0.639444381 |
| 10761 | 17.712864 | 27.704898 | MPLKIP       | 0.639340524 |
| 10762 | 16.400752 | 25.653155 | GAK          | 0.639326892 |
| 10763 | 4.985634  | 7.8051574 | TICRR        | 0.638761494 |
| 10764 | 1.368477  | 2.1427851 | ACPL2        | 0.638644075 |
| 10765 | 2.5097946 | 3.9338658 | BEND7        | 0.637997019 |
| 10766 | 35.414813 | 55.522611 | POFUT1       | 0.637844876 |
| 10767 | 2.9119266 | 4.5667941 | HOXA10       | 0.637630354 |
| 10768 | 2.0784525 | 3.2608583 | POLK         | 0.637394282 |
| 10769 | 22.434878 | 35.202069 | FADS2        | 0.637317022 |
| 10770 | 3.8231822 | 5.9996936 | SHISA2       | 0.63722958  |
| 10771 | 10.848193 | 17.025731 | LETMD1       | 0.63716459  |
| 10772 | 6.3046199 | 9.9011848 | ADAT1        | 0.636754087 |
| 10773 | 70.796912 | 111.20515 | CCT2         | 0.636633389 |
| 10774 | 9.6555753 | 15.174452 | SCD5         | 0.636304719 |
| 10775 | 9.5087224 | 14.943662 | GPRIN1       | 0.636304719 |
| 10776 | 1.548     | 2.4327967 | TM4SF19      | 0.636304719 |
| 10777 | 4.228985  | 6.6461632 | CYB561D1     | 0.636304719 |
| 10778 | 1.8082386 | 2.8417809 | TAPT1        | 0.636304719 |
| 10779 | 2.3564608 | 3.7033527 | GUSBP1       | 0.636304719 |
| 10780 | 1.2731546 | 2.0008568 | LOC100130744 | 0.636304719 |
| 10781 | 10.997335 | 17.283127 | FAM89A       | 0.636304719 |
| 10782 | 23.174574 | 36.441312 | PNRC2        | 0.635942359 |
| 10783 | 14.043277 | 22.086532 | GORASP1      | 0.635829865 |
| 10784 | 5.8913876 | 9.2668148 | CHD2         | 0.63575109  |
| 10785 | 1.9669273 | 3.0940368 | CNOT6L       | 0.635715548 |
| 10786 | 3.3698001 | 5.3019706 | ZNF621       | 0.635575012 |
| 10787 | 13.259987 | 20.862978 | FRG1         | 0.635575012 |
| 10788 | 2.5134036 | 3.9551499 | ZNF322       | 0.635476197 |
| 10789 | 28.676562 | 45.127113 | FERMT2       | 0.635461931 |
| 10790 | 12.395991 | 19.507325 | CLCC1        | 0.635453133 |
| 10791 | 32.180208 | 50.645356 | ALDH1A3      | 0.635402927 |

|       |           |           |           |             |
|-------|-----------|-----------|-----------|-------------|
| 10792 | 36.467762 | 57.394971 | OGFR      | 0.635382538 |
| 10793 | 25.013378 | 39.376112 | DNAJA2    | 0.635242441 |
| 10794 | 19.45062  | 30.622774 | CRK       | 0.635168461 |
| 10795 | 7.4209244 | 11.683396 | AGAP1     | 0.635168461 |
| 10796 | 26.033585 | 40.992782 | SNRPE     | 0.635077279 |
| 10797 | 16.452592 | 25.907466 | EBPL      | 0.635052151 |
| 10798 | 23.915775 | 37.668927 | SPATS2L   | 0.634893993 |
| 10799 | 14.004446 | 22.062771 | MLLT6     | 0.634754647 |
| 10800 | 7.9586796 | 12.543289 | ZNF414    | 0.634497035 |
| 10801 | 62.122335 | 97.911028 | MCM4      | 0.634477403 |
| 10802 | 26.284622 | 41.432031 | HEBP1     | 0.63440341  |
| 10803 | 4.2243142 | 6.6631407 | MTF2      | 0.633982439 |
| 10804 | 3.3492196 | 5.2832015 | NHLRC2    | 0.633937514 |
| 10805 | 97.564514 | 153.9074  | VDAC2     | 0.633916985 |
| 10806 | 2.4639642 | 3.8879796 | TMEM116   | 0.633738974 |
| 10807 | 29.64431  | 46.77936  | HCFC1     | 0.633704904 |
| 10808 | 9.1966474 | 14.516144 | KANSL2    | 0.633546173 |
| 10809 | 6.0471796 | 9.5449706 | C17orf80  | 0.633546173 |
| 10810 | 14.046184 | 22.17858  | PDCD10    | 0.633322041 |
| 10811 | 454.32105 | 717.43187 | RPL38     | 0.633260199 |
| 10812 | 17.602557 | 27.797651 | MAP2K7    | 0.633239011 |
| 10813 | 16.052651 | 25.354241 | EXOSC2    | 0.633134723 |
| 10814 | 1.9141824 | 3.0243175 | RC3H1     | 0.632930376 |
| 10815 | 22.693811 | 35.858206 | HINT2     | 0.632876353 |
| 10816 | 9.4105139 | 14.878072 | LPIN2     | 0.632508975 |
| 10817 | 2.9697282 | 4.6956409 | TRMT1L    | 0.632443647 |
| 10818 | 59.681573 | 94.381548 | EMG1      | 0.632343659 |
| 10819 | 2.9149181 | 4.6100297 | RAB11FIP2 | 0.632299204 |
| 10820 | 211.94673 | 335.34131 | ADRM1     | 0.632032852 |
| 10821 | 5.4629598 | 8.6454841 | KRR1      | 0.631885936 |
| 10822 | 5.4645876 | 8.6480602 | PSIMCT-1  | 0.631885936 |
| 10823 | 1.9143169 | 3.0295292 | TTC4      | 0.631885936 |
| 10824 | 3.6766552 | 5.8185425 | SDR39U1   | 0.631885936 |
| 10825 | 1.2122657 | 1.9184882 | GKAP1     | 0.631885936 |
| 10826 | 841.63715 | 1332.4884 | RPL12     | 0.631628108 |
| 10827 | 17.366625 | 27.511899 | GMPR2     | 0.631240496 |
| 10828 | 11.701782 | 18.539126 | VPS26A    | 0.631193838 |
| 10829 | 28.523366 | 45.195578 | HMGN4     | 0.631109664 |
| 10830 | 8.387596  | 13.290926 | WASF1     | 0.631076864 |
| 10831 | 18.909744 | 29.974172 | ATAD3A    | 0.630867938 |
| 10832 | 3.4276815 | 5.4338462 | TTC28     | 0.630802084 |
| 10833 | 14.012789 | 22.219114 | CTHRC1    | 0.63066372  |
| 10834 | 2.9725449 | 4.7136608 | RRP15     | 0.630623427 |

|       |           |           |          |             |
|-------|-----------|-----------|----------|-------------|
| 10835 | 7.2342215 | 11.472322 | ME2      | 0.630580387 |
| 10836 | 9.5693648 | 15.187279 | PPIL4    | 0.630090806 |
| 10837 | 13.542582 | 21.509855 | TYRO3    | 0.629598932 |
| 10838 | 0.01      | 0.0158837 | XIRP2    | 0.629577754 |
| 10839 | 0.5565801 | 0.8843191 | ZNF529   | 0.629388364 |
| 10840 | 1.877473  | 2.9830119 | DNASE1   | 0.629388364 |
| 10841 | 10.510061 | 16.698849 | BNIP1    | 0.629388363 |
| 10842 | 2.4641833 | 3.9152031 | TASP1    | 0.629388363 |
| 10843 | 1.7425401 | 2.7686246 | C18orf54 | 0.629388363 |
| 10844 | 87.237    | 138.66179 | MRPL12   | 0.629135088 |
| 10845 | 9.1492463 | 14.544988 | TRAPPC10 | 0.629030858 |
| 10846 | 7.4689212 | 11.878417 | ZEB1     | 0.628780846 |
| 10847 | 134.07635 | 213.2639  | SRM      | 0.628687485 |
| 10848 | 19.507472 | 31.031152 | PTX3     | 0.628641581 |
| 10849 | 2.8573129 | 4.546192  | FRMD5    | 0.628506867 |
| 10850 | 4.2100909 | 6.7012963 | GZF1     | 0.628250229 |
| 10851 | 13.811814 | 21.987038 | C1orf174 | 0.62817986  |
| 10852 | 0.8071979 | 1.2857917 | HTR7P1   | 0.627782781 |
| 10853 | 37.483215 | 59.724305 | EIF2S3   | 0.627604037 |
| 10854 | 4.765119  | 7.5967481 | DNAJC3   | 0.627257732 |
| 10855 | 2.31555   | 3.6920176 | ZNF341   | 0.627177397 |
| 10856 | 9.1982259 | 14.667903 | RNF149   | 0.627098922 |
| 10857 | 10.716386 | 17.08967  | DPH5     | 0.627068038 |
| 10858 | 2.1295754 | 3.3964678 | EPB41L4B | 0.62699707  |
| 10859 | 8.9911299 | 14.344845 | GBA2     | 0.626784716 |
| 10860 | 25.577774 | 40.810569 | MLST8    | 0.626743874 |
| 10861 | 2.254186  | 3.5971222 | UBE3D    | 0.626663738 |
| 10862 | 27.577341 | 44.017443 | ANAPC13  | 0.626509388 |
| 10863 | 12.534542 | 20.00695  | TOP1MT   | 0.626509388 |
| 10864 | 3.4649555 | 5.5364951 | TBKBP1   | 0.625839181 |
| 10865 | 19.651984 | 31.411641 | VPS35    | 0.625627427 |
| 10866 | 0.8825908 | 1.4110091 | SCN8A    | 0.62550325  |
| 10867 | 9.1218636 | 14.590164 | MEX3C    | 0.625206381 |
| 10868 | 74.40407  | 119.05155 | UQCRRS1  | 0.624973566 |
| 10869 | 4.0530313 | 6.4854505 | BBS4     | 0.624942135 |
| 10870 | 78.985891 | 126.39441 | HNRNPF   | 0.624915999 |
| 10871 | 2.1794768 | 3.4879421 | USP37    | 0.624860389 |
| 10872 | 135.32747 | 216.65812 | NHP2     | 0.624612961 |
| 10873 | 9.8647461 | 15.79643  | GTF3C4   | 0.624492131 |
| 10874 | 7.0059904 | 11.218701 | ACTR8    | 0.624492131 |
| 10875 | 8.1366325 | 13.033231 | ZNF317   | 0.62429897  |
| 10876 | 4.4144061 | 7.0729722 | INTS4    | 0.62412321  |
| 10877 | 10.315026 | 16.529823 | PPP1R2   | 0.624025154 |

|       |           |           |              |             |
|-------|-----------|-----------|--------------|-------------|
| 10878 | 3.2679133 | 5.2373545 | ZNRF3        | 0.623962602 |
| 10879 | 35.350481 | 56.654807 | UPP1         | 0.623962602 |
| 10880 | 8.5346035 | 13.686645 | CEP170B      | 0.623571648 |
| 10881 | 2.0355877 | 3.2650991 | RAPGEF6      | 0.623438263 |
| 10882 | 30.756892 | 49.344473 | DNAJC9       | 0.623309764 |
| 10883 | 491.40893 | 788.45939 | RPL6         | 0.623252042 |
| 10884 | 25.217291 | 40.493631 | DDIT4        | 0.62274709  |
| 10885 | 11.6948   | 18.781602 | ITPRIP       | 0.622673191 |
| 10886 | 20.410875 | 32.794031 | VAPA         | 0.622396037 |
| 10887 | 25.754446 | 41.392513 | TIMM17A      | 0.622200581 |
| 10888 | 29.161705 | 46.873878 | ISG20L2      | 0.622131265 |
| 10889 | 7.3668323 | 11.851764 | FXR1         | 0.621581065 |
| 10890 | 11.665892 | 18.773825 | PET112       | 0.621391327 |
| 10891 | 20.053279 | 32.279319 | TNPO3        | 0.621242329 |
| 10892 | 23.795657 | 38.311565 | MCM3AP       | 0.621108974 |
| 10893 | 3.2393044 | 5.217229  | VPS13D       | 0.620885988 |
| 10894 | 39.489068 | 63.629479 | PPP2R5D      | 0.620609639 |
| 10895 | 0.1237772 | 0.1995128 | ABCC2        | 0.620397103 |
| 10896 | 0.3385857 | 0.5457564 | TINCR        | 0.620397102 |
| 10897 | 0.9041193 | 1.4573236 | DUSP15       | 0.620397102 |
| 10898 | 1.2380168 | 1.9955232 | SUSD4        | 0.620397101 |
| 10899 | 0.3786787 | 0.6103811 | LOC150381    | 0.620397101 |
| 10900 | 0.7017943 | 1.1312018 | SETDB2       | 0.620397101 |
| 10901 | 1.28027   | 2.0636298 | NSUN3        | 0.620397101 |
| 10902 | 0.5762198 | 0.9287919 | RNF39        | 0.620397101 |
| 10903 | 5.2933081 | 8.532129  | SAMHD1       | 0.620397101 |
| 10904 | 12.233807 | 19.719316 | ZNF496       | 0.620397101 |
| 10905 | 0.8918666 | 1.4375738 | LOC100505622 | 0.620397101 |
| 10906 | 7.4396762 | 11.991797 | AVL9         | 0.620397101 |
| 10907 | 13.857072 | 22.335811 | CDK7         | 0.620397101 |
| 10908 | 3.0587011 | 4.9302311 | ERCC8        | 0.620397101 |
| 10909 | 2.1200356 | 3.4172236 | BRAF         | 0.620397101 |
| 10910 | 2.5606319 | 4.127408  | LOC401321    | 0.620397101 |
| 10911 | 5.178602  | 8.3472376 | C9orf85      | 0.620397101 |
| 10912 | 0.773282  | 1.2464307 | ZNF649       | 0.620397101 |
| 10913 | 2.8744759 | 4.6332838 | BARD1        | 0.620397101 |
| 10914 | 8.2597363 | 13.313628 | ORC5         | 0.620397101 |
| 10915 | 1.312064  | 2.1148777 | C15orf48     | 0.620397101 |
| 10916 | 0.2765142 | 0.4457051 | LOC153684    | 0.620397101 |
| 10917 | 0.3639107 | 0.586577  | PPM1N        | 0.6203971   |
| 10918 | 0.1960484 | 0.3160048 | LOC100131096 | 0.6203971   |
| 10919 | 0.3020283 | 0.4868305 | LOC442132    | 0.6203971   |
| 10920 | 0.3073739 | 0.495447  | ZNRF2P1      | 0.6203971   |

|       |           |           |          |             |
|-------|-----------|-----------|----------|-------------|
| 10921 | 0.4300838 | 0.6932396 | RAPGEF4  | 0.6203971   |
| 10922 | 0.2477996 | 0.399421  | L1CAM    | 0.6203971   |
| 10923 | 42.784975 | 68.99538  | HNRPDL   | 0.620113621 |
| 10924 | 9.7483585 | 15.731366 | BRF1     | 0.619676547 |
| 10925 | 167.68031 | 270.66018 | RPS24    | 0.619523379 |
| 10926 | 380.49715 | 614.17914 | YWHAE    | 0.619521452 |
| 10927 | 35.723803 | 57.664563 | ARHGEF1  | 0.619510503 |
| 10928 | 79.359562 | 128.12536 | MANF     | 0.619389963 |
| 10929 | 28.265679 | 45.637846 | IDH2     | 0.61934736  |
| 10930 | 36.967131 | 59.690778 | PGRMC1   | 0.619310591 |
| 10931 | 16.612629 | 26.825229 | CENPH    | 0.619291224 |
| 10932 | 3.3434762 | 5.3994202 | TBC1D24  | 0.619228745 |
| 10933 | 58.308038 | 94.181237 | SF3A1    | 0.619104607 |
| 10934 | 8.2656342 | 13.351482 | SLC25A29 | 0.61907991  |
| 10935 | 5.7323062 | 9.2640523 | MTFMT    | 0.618768762 |
| 10936 | 22.252944 | 35.978898 | CDC6     | 0.618499862 |
| 10937 | 9.1239117 | 14.751818 | TRIM14   | 0.618494042 |
| 10938 | 5.0406531 | 8.150272  | SLFN11   | 0.6184644   |
| 10939 | 3.1658535 | 5.1215031 | NARG2    | 0.618149286 |
| 10940 | 3.5644905 | 5.7666799 | PHC3     | 0.618118324 |
| 10941 | 13.461384 | 21.790838 | SMIM15   | 0.617754302 |
| 10942 | 5.4669957 | 8.8504045 | FAM160A2 | 0.617711399 |
| 10943 | 4.6495846 | 7.5289084 | SNTB2    | 0.617564238 |
| 10944 | 4.7984892 | 7.7705194 | CDCA2    | 0.617524892 |
| 10945 | 1.6881865 | 2.7342525 | ZMYM2    | 0.617421575 |
| 10946 | 10.153874 | 16.457032 | CDCA7L   | 0.616993002 |
| 10947 | 8.5998387 | 13.94059  | CBX2     | 0.616892033 |
| 10948 | 3.9903734 | 6.470655  | CCDC93   | 0.616687701 |
| 10949 | 18.839687 | 30.554594 | WAC-AS1  | 0.616590984 |
| 10950 | 0.7426735 | 1.2056445 | NYNRIN   | 0.615997122 |
| 10951 | 48.07005  | 78.039475 | AATF     | 0.615970962 |
| 10952 | 3.8630756 | 6.2733965 | LRP6     | 0.615786932 |
| 10953 | 33.135521 | 53.813275 | HCFC1R1  | 0.615749932 |
| 10954 | 0.01      | 0.0162434 | DNAH7    | 0.615635454 |
| 10955 | 7.2758807 | 11.829761 | RNF111   | 0.61504885  |
| 10956 | 13.997345 | 22.758445 | LARP4B   | 0.615039613 |
| 10957 | 24.463624 | 39.777235 | TSTA3    | 0.615015714 |
| 10958 | 1.5706711 | 2.5547346 | TXNRD3   | 0.614807938 |
| 10959 | 473.24374 | 770.04665 | EIF5A    | 0.614565025 |
| 10960 | 46.806305 | 76.164249 | MIF      | 0.614544298 |
| 10961 | 23.763949 | 38.670807 | TIMM44   | 0.614519092 |
| 10962 | 12.043813 | 19.600508 | SCAF8    | 0.614464342 |
| 10963 | 33.9255   | 55.24152  | PLS3     | 0.614130464 |

|       |           |           |           |             |
|-------|-----------|-----------|-----------|-------------|
| 10964 | 71.544172 | 116.49937 | DNAJA1    | 0.614116365 |
| 10965 | 30.416123 | 49.532945 | MRPS26    | 0.614058433 |
| 10966 | 13.699406 | 22.318263 | MTDH      | 0.613820453 |
| 10967 | 15.90468  | 25.915958 | STX18     | 0.613702168 |
| 10968 | 18.937548 | 30.859401 | RBM38     | 0.613671929 |
| 10969 | 27.047848 | 44.077788 | SELT      | 0.613638963 |
| 10970 | 7.6537563 | 12.473943 | FMR1      | 0.613579551 |
| 10971 | 15.976625 | 26.043791 | JMJD8     | 0.613452357 |
| 10972 | 1.5154753 | 2.4706676 | NUDT4     | 0.613386965 |
| 10973 | 2.8609463 | 4.6641785 | EXOC8     | 0.613386964 |
| 10974 | 4.2816065 | 6.9825896 | SBF2      | 0.613183181 |
| 10975 | 1.3738739 | 2.2421887 | LOC283070 | 0.612737878 |
| 10976 | 1.7281119 | 2.8203119 | ROBO4     | 0.612737878 |
| 10977 | 13.609763 | 22.211395 | TMEM256   | 0.612737878 |
| 10978 | 1.548     | 2.5263658 | MAP6D1    | 0.612737878 |
| 10979 | 1.2726687 | 2.0770198 | C12orf66  | 0.612737877 |
| 10980 | 8.4481824 | 13.787596 | WDR33     | 0.612737877 |
| 10981 | 0.7504821 | 1.2248012 | TRPV1     | 0.612737877 |
| 10982 | 0.3914065 | 0.6387829 | PGM2L1    | 0.612737877 |
| 10983 | 13.070831 | 21.33462  | BAHD1     | 0.61265826  |
| 10984 | 7.099379  | 11.589366 | TAF5L     | 0.61257697  |
| 10985 | 66.211414 | 108.10749 | NOC2L     | 0.612459084 |
| 10986 | 10.576464 | 17.274039 | NUP43     | 0.612275085 |
| 10987 | 6.0360293 | 9.8590236 | SNAPC4    | 0.612233981 |
| 10988 | 3.4823533 | 5.6879452 | SLC38A9   | 0.612233981 |
| 10989 | 8.2093046 | 13.410752 | DNAJC10   | 0.612143481 |
| 10990 | 1.7917538 | 2.9279112 | PGBD5     | 0.611956324 |
| 10991 | 1.195093  | 1.9529058 | LCORL     | 0.611956324 |
| 10992 | 27.288099 | 44.61101  | MAX       | 0.611689773 |
| 10993 | 2.1405671 | 3.499608  | SRD5A3    | 0.611659114 |
| 10994 | 58.939026 | 96.364392 | PHLDA2    | 0.611626606 |
| 10995 | 8.4555726 | 13.825071 | ANKRD27   | 0.611611521 |
| 10996 | 7.5074325 | 12.277026 | PSEN1     | 0.611502519 |
| 10997 | 14.037933 | 22.95646  | DPP7      | 0.611502519 |
| 10998 | 28.463876 | 46.558703 | MFF       | 0.611354558 |
| 10999 | 16.753036 | 27.403786 | RTF1      | 0.611340209 |
| 11000 | 11.730009 | 19.189984 | DRAM2     | 0.611256812 |
| 11001 | 29.098506 | 47.610219 | CHP1      | 0.611181941 |
| 11002 | 22.846215 | 37.383875 | CAB39     | 0.611124862 |
| 11003 | 0.6550274 | 1.072063  | ZNF549    | 0.610997145 |
| 11004 | 1.4139841 | 2.3142237 | HSF2BP    | 0.610997145 |
| 11005 | 5.1092758 | 8.3621926 | WDR25     | 0.610997145 |
| 11006 | 8.76289   | 14.341949 | WDR73     | 0.610997145 |



|       |           |           |            |             |
|-------|-----------|-----------|------------|-------------|
| 11007 | 0.8516798 | 1.3939178 | ACOT11     | 0.610997145 |
| 11008 | 2.0377537 | 3.335128  | PIF1       | 0.610997145 |
| 11009 | 0.7038694 | 1.1520012 | ZNF460     | 0.610997145 |
| 11010 | 0.4903518 | 0.8025435 | STARD4-AS1 | 0.610997145 |
| 11011 | 2.5663673 | 4.2041898 | LARP1B     | 0.610430882 |
| 11012 | 10.356824 | 16.978879 | C16orf59   | 0.609982761 |
| 11013 | 8.2834508 | 13.579811 | PPT2       | 0.609982761 |
| 11014 | 6.6999227 | 10.984543 | PIGG       | 0.60994097  |
| 11015 | 6.5810368 | 10.792265 | RBM27      | 0.609792023 |
| 11016 | 0.7860263 | 1.2890072 | ZNF490     | 0.609792023 |
| 11017 | 11.357023 | 18.632301 | NEK9       | 0.609534117 |
| 11018 | 25.139707 | 41.248561 | ITPA       | 0.609468697 |
| 11019 | 32.335348 | 53.0574   | NARS       | 0.609440861 |
| 11020 | 2.4266703 | 3.9825968 | TMEM180    | 0.609318581 |
| 11021 | 24.298152 | 39.880537 | UTP11L     | 0.609273437 |
| 11022 | 343.93204 | 564.89774 | RPL15      | 0.60883947  |
| 11023 | 2.8535467 | 4.6871592 | COG3       | 0.608800894 |
| 11024 | 28.46043  | 46.753441 | AEN        | 0.608734432 |
| 11025 | 0.5084155 | 0.8358901 | GPR153     | 0.608232453 |
| 11026 | 0.8362741 | 1.3749251 | RRN3P3     | 0.608232452 |
| 11027 | 1.7152222 | 2.820011  | TSPY26P    | 0.608232452 |
| 11028 | 63.711879 | 104.74923 | PSMA3      | 0.608232452 |
| 11029 | 2.0258249 | 3.3306754 | PARP8      | 0.608232452 |
| 11030 | 9.3410802 | 15.357747 | ZNF335     | 0.608232452 |
| 11031 | 0.4955993 | 0.8148189 | KIAA1161   | 0.608232452 |
| 11032 | 45.505179 | 74.884205 | ENSA       | 0.607673928 |
| 11033 | 2.3471787 | 3.8638456 | SNRNP48    | 0.607472161 |
| 11034 | 38.249155 | 62.970466 | NUP188     | 0.607414202 |
| 11035 | 6.9184832 | 11.390058 | ALG1       | 0.607414202 |
| 11036 | 3.7614005 | 6.1928109 | ZBTB5      | 0.607381777 |
| 11037 | 5.5274419 | 9.1021608 | CD58       | 0.607267004 |
| 11038 | 60.396033 | 99.490179 | C14orf2    | 0.607055228 |
| 11039 | 12.168063 | 20.055337 | TRAPPC4    | 0.606724438 |
| 11040 | 3.9551897 | 6.5189226 | HOMEZ      | 0.606724438 |
| 11041 | 31.467978 | 51.896055 | MRPL4      | 0.606365503 |
| 11042 | 5.6958063 | 9.3969254 | AP5M1      | 0.606135099 |
| 11043 | 21.15731  | 34.912793 | AGPAT2     | 0.606004494 |
| 11044 | 26.961159 | 44.497117 | GATAD2A    | 0.605907997 |
| 11045 | 14.856824 | 24.526068 | BTF3L4     | 0.605756462 |
| 11046 | 5.1087941 | 8.4374169 | NSUN4      | 0.605492666 |
| 11047 | 72.260771 | 119.3435  | ACLY       | 0.605485596 |
| 11048 | 1.4665263 | 2.4229473 | CASP8AP2   | 0.605265465 |
| 11049 | 10.060666 | 16.625313 | GSE1       | 0.605141435 |

|       |           |           |          |             |
|-------|-----------|-----------|----------|-------------|
| 11050 | 18.701638 | 30.920405 | NDRG3    | 0.604831583 |
| 11051 | 113.94715 | 188.44441 | KPNB1    | 0.604672512 |
| 11052 | 6.5239165 | 10.790888 | PTPN2    | 0.60457641  |
| 11053 | 505.33532 | 835.88409 | RPL10    | 0.604551905 |
| 11054 | 6.2224031 | 10.292784 | IKBKAP   | 0.604540306 |
| 11055 | 5.4092766 | 8.9485041 | LRRC28   | 0.604489483 |
| 11056 | 17.921507 | 29.663568 | RYK      | 0.60415884  |
| 11057 | 2.4449335 | 4.0477893 | MALT1    | 0.60401698  |
| 11058 | 29.389673 | 48.664331 | HMOX2    | 0.603926382 |
| 11059 | 1046.1448 | 1732.3756 | RPS16    | 0.603878714 |
| 11060 | 15.393145 | 25.494838 | AAGAB    | 0.603774957 |
| 11061 | 727.29084 | 1204.7579 | RPL7A    | 0.603682141 |
| 11062 | 7.0537364 | 11.684912 | NUDT19   | 0.603661919 |
| 11063 | 4.4946832 | 7.4500127 | BIRC6    | 0.603312155 |
| 11064 | 0.691209  | 1.1459721 | CCDC136  | 0.603163849 |
| 11065 | 4.2014754 | 6.9657282 | RAD50    | 0.603163848 |
| 11066 | 4.827631  | 8.0038468 | MLLT10   | 0.603163848 |
| 11067 | 4.2814198 | 7.09827   | PPTC7    | 0.603163848 |
| 11068 | 0.7849322 | 1.3013582 | ZRANB3   | 0.603163848 |
| 11069 | 0.6334331 | 1.0501842 | MIR210HG | 0.603163848 |
| 11070 | 47.938543 | 79.52447  | PTDSS1   | 0.602814997 |
| 11071 | 5.55732   | 9.219522  | CTDSPL2  | 0.602777453 |
| 11072 | 61.199511 | 101.55044 | H1FO     | 0.602651389 |
| 11073 | 7.6312656 | 12.665077 | ZFAND1   | 0.602543947 |
| 11074 | 19.03925  | 31.613174 | SSBP4    | 0.602256835 |
| 11075 | 2.932866  | 4.8701153 | LRRC8E   | 0.602216966 |
| 11076 | 39.936207 | 66.366633 | TAF9     | 0.601751287 |
| 11077 | 28.223039 | 46.922309 | FAM192A  | 0.601484446 |
| 11078 | 69.105448 | 114.91579 | STRAP    | 0.601357263 |
| 11079 | 4.919044  | 8.1802667 | AZI2     | 0.601330524 |
| 11080 | 102.25648 | 170.05195 | YWHAB    | 0.601324934 |
| 11081 | 5.4384003 | 9.0465109 | RABGEF1  | 0.601159982 |
| 11082 | 2.0451374 | 3.4019853 | YAF2     | 0.601159982 |
| 11083 | 67.196068 | 111.85842 | PRDX3    | 0.60072426  |
| 11084 | 5.9712191 | 9.9435371 | ANGPT2   | 0.600512579 |
| 11085 | 4.336637  | 7.223102  | C15orf41 | 0.600384291 |
| 11086 | 7.2720989 | 12.112407 | SNAPC3   | 0.600384291 |
| 11087 | 111.20265 | 185.22818 | CYC1     | 0.600354904 |
| 11088 | 17.100236 | 28.494567 | PIK3CD   | 0.600122686 |
| 11089 | 19.506458 | 32.507717 | PARVB    | 0.600056213 |
| 11090 | 5.5020287 | 9.174372  | COX15    | 0.599717198 |
| 11091 | 4.16799   | 6.9499258 | FZD1     | 0.599717198 |
| 11092 | 10.82307  | 18.049799 | SPEN     | 0.599622769 |

|       |           |           |          |             |
|-------|-----------|-----------|----------|-------------|
| 11093 | 11.581591 | 19.32559  | SIPA1L1  | 0.599287857 |
| 11094 | 97.188949 | 162.1955  | EIF3E    | 0.599208675 |
| 11095 | 21.647131 | 36.134312 | DFFA     | 0.599074124 |
| 11096 | 7.3676591 | 12.299848 | C1orf109 | 0.599004098 |
| 11097 | 4.9297691 | 8.2305396 | PWWP2A   | 0.598960616 |
| 11098 | 0.9885272 | 1.6513191 | SDHAP2   | 0.598628782 |
| 11099 | 7.7092296 | 12.878147 | MOCS1    | 0.598628782 |
| 11100 | 1.6587514 | 2.7709183 | METTL12  | 0.598628782 |
| 11101 | 2.3958138 | 4.0021694 | SPOPL    | 0.598628782 |
| 11102 | 2.8392302 | 4.7428896 | ZFP62    | 0.598628782 |
| 11103 | 4.7153684 | 7.8769491 | ZNF275   | 0.598628782 |
| 11104 | 35.463438 | 59.261938 | NDRG1    | 0.59841846  |
| 11105 | 6.359848  | 10.6285   | DPP8     | 0.598376834 |
| 11106 | 1.6564057 | 2.7690802 | ZC3H12C  | 0.598179023 |
| 11107 | 59.290815 | 99.121892 | PSME3    | 0.598160646 |
| 11108 | 2.9736913 | 4.9745709 | UBE2V1   | 0.597778457 |
| 11109 | 76.611719 | 128.2105  | CALM1    | 0.597546379 |
| 11110 | 28.41392  | 47.554229 | NIPSNAP1 | 0.597505651 |
| 11111 | 2.9479799 | 4.9345229 | CBWD1    | 0.597419431 |
| 11112 | 7.7999813 | 13.056123 | RSPRY1   | 0.597419431 |
| 11113 | 3.5591695 | 5.9608014 | SKIL     | 0.597095802 |
| 11114 | 25.945927 | 43.455325 | DDX1     | 0.597071284 |
| 11115 | 20.074232 | 33.624666 | NTMT1    | 0.597009115 |
| 11116 | 4.5753875 | 7.6679106 | ROCK1    | 0.596692864 |
| 11117 | 2.2413904 | 3.7573451 | ENOX2    | 0.596535674 |
| 11118 | 2.9165819 | 4.8891995 | FAM102B  | 0.596535674 |
| 11119 | 3.4839705 | 5.8403388 | ARL5B    | 0.596535674 |
| 11120 | 1.9314133 | 3.2377164 | PLCD4    | 0.596535674 |
| 11121 | 33.55731  | 56.253652 | POLE3    | 0.596535674 |
| 11122 | 4.115314  | 6.8986888 | TYSND1   | 0.596535674 |
| 11123 | 2.5781381 | 4.3218507 | UEVLD    | 0.596535674 |
| 11124 | 7.6318176 | 12.793565 | PXK      | 0.596535674 |
| 11125 | 6.9197399 | 11.599876 | RABEP1   | 0.596535674 |
| 11126 | 12.348412 | 20.705377 | KDSR     | 0.596386726 |
| 11127 | 12.753615 | 21.388216 | CGGBP1   | 0.596291693 |
| 11128 | 1.4567399 | 2.4447621 | EVC2     | 0.595861622 |
| 11129 | 4.8733422 | 8.1859433 | C17orf58 | 0.595330552 |
| 11130 | 5.1557168 | 8.6602591 | PHLDB2   | 0.595330551 |
| 11131 | 8.0484731 | 13.528098 | EIF4E    | 0.594944912 |
| 11132 | 6.8707522 | 11.551238 | NEURL4   | 0.594806585 |
| 11133 | 5.50639   | 9.2593988 | SIRPA    | 0.594681159 |
| 11134 | 19.789196 | 33.2808   | NFYC     | 0.594612998 |
| 11135 | 17.867653 | 30.056099 | UQCC     | 0.594476786 |

|       |           |           |              |             |
|-------|-----------|-----------|--------------|-------------|
| 11136 | 19.66033  | 33.072746 | MRPL15       | 0.594457153 |
| 11137 | 3.305067  | 5.559807  | TRPM7        | 0.594457153 |
| 11138 | 2.9448632 | 4.9548154 | UVRAG        | 0.59434368  |
| 11139 | 2.8810991 | 4.8503578 | GABPB2       | 0.593997224 |
| 11140 | 16.508814 | 27.799703 | DUT          | 0.593848577 |
| 11141 | 40.554465 | 68.308581 | IMP4         | 0.593695028 |
| 11142 | 5.9652673 | 10.049477 | TMEM243      | 0.593589819 |
| 11143 | 1.681516  | 2.8327912 | LGALSL       | 0.593589819 |
| 11144 | 7.2447409 | 12.206727 | DHX40        | 0.593503953 |
| 11145 | 1.9427307 | 3.2745821 | GXYLT1       | 0.593275916 |
| 11146 | 31.562019 | 53.199562 | GNPDA1       | 0.593275916 |
| 11147 | 0.8209214 | 1.3847644 | NBPF10       | 0.592823896 |
| 11148 | 74.391683 | 125.50143 | CHCHD3       | 0.592755646 |
| 11149 | 1.597291  | 2.6957858 | PRDM15       | 0.592514085 |
| 11150 | 292.73508 | 494.09556 | RPL13A       | 0.592466536 |
| 11151 | 0.01      | 0.0168786 | ERBB4        | 0.592464761 |
| 11152 | 10.698475 | 18.065729 | ZMYM3        | 0.592197233 |
| 11153 | 12.931711 | 21.838359 | ACD          | 0.592155823 |
| 11154 | 4.2401208 | 7.1644698 | PARG         | 0.591826182 |
| 11155 | 5.2311951 | 8.8422167 | ATF2         | 0.591615792 |
| 11156 | 6.5088305 | 11.00654  | FAM91A1      | 0.591360251 |
| 11157 | 43.110472 | 72.916197 | RRM1         | 0.591233135 |
| 11158 | 11.823805 | 20.001807 | AP3M1        | 0.591136817 |
| 11159 | 0.1647427 | 0.2788211 | GRIP1        | 0.590854383 |
| 11160 | 0.4188935 | 0.7089623 | DLX6-AS1     | 0.590854383 |
| 11161 | 0.1650036 | 0.2792627 | LOC100271836 | 0.590854383 |
| 11162 | 0.2572833 | 0.4354429 | FHDC1        | 0.590854383 |
| 11163 | 0.3939499 | 0.6667462 | MAPK13       | 0.590854382 |
| 11164 | 0.3845009 | 0.6507541 | CCDC96       | 0.590854382 |
| 11165 | 6.3451798 | 10.738991 | IFI30        | 0.590854382 |
| 11166 | 2.0592836 | 3.4852642 | CCDC122      | 0.590854382 |
| 11167 | 10.461584 | 17.705858 | TMEM9B       | 0.590854382 |
| 11168 | 3.33606   | 5.6461628 | UBE2D4       | 0.590854382 |
| 11169 | 3.400458  | 5.7551541 | PVT1         | 0.590854382 |
| 11170 | 1.5566723 | 2.6346124 | LOC642236    | 0.590854382 |
| 11171 | 0.3897139 | 0.6595769 | ASB16        | 0.590854382 |
| 11172 | 1.5908359 | 2.6924331 | LOC645513    | 0.590854382 |
| 11173 | 0.4149318 | 0.7022573 | TMEM217      | 0.590854382 |
| 11174 | 0.3251162 | 0.5502476 | KLHL7-AS1    | 0.590854382 |
| 11175 | 0.5885952 | 0.9961765 | LRRC37A3     | 0.590854382 |
| 11176 | 0.52726   | 0.8923687 | TPT1-AS1     | 0.590854381 |
| 11177 | 0.4840871 | 0.8193002 | C9orf117     | 0.590854381 |
| 11178 | 0.0948672 | 0.1605593 | ITGB8        | 0.590854381 |

|       |           |           |            |             |
|-------|-----------|-----------|------------|-------------|
| 11179 | 0.1236609 | 0.2092916 | ZNF578     | 0.59085438  |
| 11180 | 115.80126 | 196.06707 | EIF3D      | 0.590620658 |
| 11181 | 14.340877 | 24.286834 | NCOR1      | 0.590479474 |
| 11182 | 4.9667795 | 8.416022  | LCLAT1     | 0.59015762  |
| 11183 | 25.135207 | 42.64814  | SEPHS1     | 0.589362325 |
| 11184 | 20.815746 | 35.346951 | MRPL45     | 0.58889791  |
| 11185 | 50.442152 | 85.657835 | LSM2       | 0.588879601 |
| 11186 | 50.198532 | 85.250159 | PRKDC      | 0.588837991 |
| 11187 | 6.3326882 | 10.755194 | TMEM181    | 0.588802804 |
| 11188 | 17.535233 | 29.786467 | PRKAG1     | 0.588697979 |
| 11189 | 4.5048383 | 7.6537157 | USP42      | 0.588581865 |
| 11190 | 4.8313167 | 8.2084023 | DCUN1D1    | 0.588581865 |
| 11191 | 4.0287117 | 6.8462815 | ATXN7      | 0.588452535 |
| 11192 | 26.321931 | 44.735612 | TRIM27     | 0.588388753 |
| 11193 | 10.054362 | 17.090315 | NAT14      | 0.588307596 |
| 11194 | 3.4998389 | 5.948995  | NAP1L5     | 0.588307596 |
| 11195 | 83.469196 | 141.98279 | EIF4A2     | 0.587882499 |
| 11196 | 26.049938 | 44.324359 | ORAI1      | 0.58771154  |
| 11197 | 2.8234771 | 4.8111422 | METAP1D    | 0.586862123 |
| 11198 | 0.4749202 | 0.8092534 | BACH2      | 0.586862123 |
| 11199 | 14.717649 | 25.084103 | TWF1       | 0.586732142 |
| 11200 | 26.646713 | 45.420746 | FH         | 0.586663925 |
| 11201 | 97.835583 | 166.80901 | PTGES3     | 0.586512582 |
| 11202 | 47.33843  | 80.752614 | NSA2       | 0.586215443 |
| 11203 | 11.666468 | 19.90596  | RPAP1      | 0.586079158 |
| 11204 | 13.054911 | 22.278373 | MGEA5      | 0.58599033  |
| 11205 | 1.5865614 | 2.7077633 | LNP1       | 0.585930595 |
| 11206 | 6.2154237 | 10.607781 | PITPNA-AS1 | 0.585930595 |
| 11207 | 34.00458  | 58.068331 | TRA2B      | 0.585595969 |
| 11208 | 17.253627 | 29.483778 | SPRED2     | 0.585190517 |
| 11209 | 29.936712 | 51.18837  | XPOT       | 0.584834245 |
| 11210 | 5.1632844 | 8.8327742 | ZFHX3      | 0.584559769 |
| 11211 | 10.131422 | 17.333115 | SEC63      | 0.584512474 |
| 11212 | 9.450675  | 16.170699 | MED11      | 0.584432052 |
| 11213 | 1.821919  | 3.1174179 | METTL18    | 0.584432052 |
| 11214 | 1.7456144 | 2.986856  | SERPINF1   | 0.584432052 |
| 11215 | 0.8839131 | 1.5124308 | ZNF33A     | 0.584432052 |
| 11216 | 11.314426 | 19.37107  | EAPP       | 0.584088874 |
| 11217 | 4.4875492 | 7.6848583 | FAM178A    | 0.583946912 |
| 11218 | 6.3889688 | 10.944011 | AMIGO2     | 0.583786746 |
| 11219 | 34.280067 | 58.745656 | WDR82      | 0.583533644 |
| 11220 | 5.6780009 | 9.7321458 | SACM1L     | 0.583427441 |
| 11221 | 1.0960528 | 1.8791217 | WDR5B      | 0.583279326 |

|       |           |           |          |             |
|-------|-----------|-----------|----------|-------------|
| 11222 | 1.6081336 | 2.7570558 | MPP3     | 0.583279326 |
| 11223 | 33.151041 | 56.835619 | MTRNR2L3 | 0.583279326 |
| 11224 | 2.9082074 | 4.9859601 | ABHD17B  | 0.583279326 |
| 11225 | 3.8430754 | 6.5887393 | CCDC77   | 0.583279326 |
| 11226 | 2.4194137 | 4.1479504 | ATP5S    | 0.583279326 |
| 11227 | 21.156417 | 36.274078 | HMGB3    | 0.5832379   |
| 11228 | 23.522201 | 40.332783 | NDUFS1   | 0.58320303  |
| 11229 | 13.189268 | 22.618245 | ZNF687   | 0.583125182 |
| 11230 | 14.378212 | 24.6618   | NDUFA10  | 0.583015518 |
| 11231 | 40.164032 | 68.915956 | CTPS1    | 0.582797277 |
| 11232 | 4.8170201 | 8.275231  | ARNT2    | 0.582100984 |
| 11233 | 30.309541 | 52.084468 | SF3B3    | 0.581930508 |
| 11234 | 0.4249197 | 0.7305767 | ZNF273   | 0.581622283 |
| 11235 | 3.3779298 | 5.8077723 | THTPA    | 0.581622282 |
| 11236 | 0.5335976 | 0.9174297 | DZANK1   | 0.581622282 |
| 11237 | 1.7345975 | 2.9823436 | MN1      | 0.581622282 |
| 11238 | 19.090903 | 32.835826 | ATP6V1D  | 0.581404691 |
| 11239 | 18.151818 | 31.223835 | ARL8B    | 0.581344923 |
| 11240 | 17.527906 | 30.159779 | SKI      | 0.581168244 |
| 11241 | 35.723721 | 61.542806 | SAFB     | 0.580469481 |
| 11242 | 7.7413764 | 13.340946 | LHFPL2   | 0.580271915 |
| 11243 | 4.4111699 | 7.6024832 | EFTUD1   | 0.580227505 |
| 11244 | 2.943315  | 5.074278  | TMEM106B | 0.58004607  |
| 11245 | 7.0163639 | 12.10331  | CNOT6    | 0.579706186 |
| 11246 | 0.6026402 | 1.0396372 | PDK3     | 0.579663959 |
| 11247 | 44.522662 | 76.818638 | SFXN1    | 0.579581502 |
| 11248 | 23.243947 | 40.109407 | TBL3     | 0.579513607 |
| 11249 | 7.3654709 | 12.710225 | LOC92249 | 0.579491797 |
| 11250 | 14.12346  | 24.37281  | MACF1    | 0.579476074 |
| 11251 | 834.78041 | 1441.1386 | RPS8     | 0.579250616 |
| 11252 | 1.3420391 | 2.3177075 | MTRF1    | 0.579037295 |
| 11253 | 3.4476727 | 5.9541461 | HS2ST1   | 0.579037294 |
| 11254 | 2.5070617 | 4.3297067 | CALML4   | 0.579037294 |
| 11255 | 40.621261 | 70.15587  | PRRC2C   | 0.579014431 |
| 11256 | 15.558091 | 26.876681 | KIF23    | 0.578869506 |
| 11257 | 30.832475 | 53.267185 | RSL24D1  | 0.578826812 |
| 11258 | 8.1508762 | 14.087498 | SMARCA5  | 0.578589354 |
| 11259 | 26.769281 | 46.275336 | AFG3L2   | 0.578478378 |
| 11260 | 42.913668 | 74.186209 | OCIAD2   | 0.578458836 |
| 11261 | 7.0874444 | 12.254885 | PBX3     | 0.578336281 |
| 11262 | 11.218402 | 19.402157 | TP53INP2 | 0.578203847 |
| 11263 | 298.27626 | 515.99019 | RPL21    | 0.578065755 |
| 11264 | 37.342779 | 64.618394 | SRSF7    | 0.577897049 |

|       |           |           |           |             |
|-------|-----------|-----------|-----------|-------------|
| 11265 | 2.743999  | 4.7488751 | POLR2M    | 0.577820829 |
| 11266 | 2.9920962 | 5.1797652 | KNTC1     | 0.577650932 |
| 11267 | 5.2845681 | 9.150025  | ARMC8     | 0.577546851 |
| 11268 | 6.3110797 | 10.93097  | NUFIP2    | 0.577357708 |
| 11269 | 25.311323 | 43.840708 | WDR46     | 0.577347497 |
| 11270 | 14.951477 | 25.904484 | PRPF4     | 0.577177197 |
| 11271 | 12.115335 | 20.999323 | COIL      | 0.576939333 |
| 11272 | 10.607649 | 18.387098 | MLF1IP    | 0.576907176 |
| 11273 | 6.1656657 | 10.689147 | FBRSL1    | 0.576815487 |
| 11274 | 1.1993621 | 2.0798746 | PSD4      | 0.576651152 |
| 11275 | 16.931765 | 29.367787 | GPBP1L1   | 0.576542096 |
| 11276 | 6.5867551 | 11.426955 | GABPB1    | 0.576422594 |
| 11277 | 433.03039 | 751.24928 | RPL10A    | 0.576413725 |
| 11278 | 3.5605945 | 6.1780998 | RIOK2     | 0.576325176 |
| 11279 | 5.0262624 | 8.7277252 | C18orf25  | 0.575896043 |
| 11280 | 28.082202 | 48.778867 | ZNF598    | 0.57570427  |
| 11281 | 4.8758982 | 8.4705984 | IRX3      | 0.575626176 |
| 11282 | 13.582045 | 23.602854 | TXNRD2    | 0.57544079  |
| 11283 | 2.6866124 | 4.670332  | ATP11C    | 0.575250833 |
| 11284 | 14.540689 | 25.283071 | HIPK1     | 0.575115592 |
| 11285 | 51.771219 | 90.02753  | PSMD1     | 0.575059855 |
| 11286 | 21.508116 | 37.404035 | WDR6      | 0.575021273 |
| 11287 | 74.967469 | 130.40759 | GLO1      | 0.574870448 |
| 11288 | 27.083142 | 47.112872 | SLC39A14  | 0.57485652  |
| 11289 | 51.405848 | 89.432807 | CCNB1     | 0.574798556 |
| 11290 | 11.258223 | 19.586711 | TSPAN5    | 0.574788855 |
| 11291 | 0.1880183 | 0.3273061 | ARHGAP28  | 0.574441761 |
| 11292 | 0.2917943 | 0.5079615 | UCKL1-AS1 | 0.574441761 |
| 11293 | 0.4258265 | 0.7412875 | SNAI3-AS1 | 0.574441761 |
| 11294 | 0.3578288 | 0.6229157 | KCNJ5     | 0.57444176  |
| 11295 | 0.9429842 | 1.6415662 | SMPDL3A   | 0.57444176  |
| 11296 | 2.7293299 | 4.7512735 | C8orf42   | 0.57444176  |
| 11297 | 0.8883184 | 1.5464029 | CFD       | 0.57444176  |
| 11298 | 2.1429255 | 3.7304486 | HYAL3     | 0.57444176  |
| 11299 | 2.8315149 | 4.9291593 | KCTD6     | 0.57444176  |
| 11300 | 4.0231564 | 7.0035931 | C1orf50   | 0.57444176  |
| 11301 | 3.5719797 | 6.2181755 | RNF141    | 0.57444176  |
| 11302 | 0.9966499 | 1.7349886 | PCED1B    | 0.57444176  |
| 11303 | 14.091627 | 24.530993 | MLH1      | 0.57444176  |
| 11304 | 12.847758 | 22.365641 | SURF6     | 0.57444176  |
| 11305 | 1.0985741 | 1.9124203 | LOC401052 | 0.57444176  |
| 11306 | 0.1917552 | 0.3338113 | TMEM63C   | 0.57444176  |
| 11307 | 0.6368205 | 1.1085901 | PPM1E     | 0.57444176  |

|       |           |           |              |             |
|-------|-----------|-----------|--------------|-------------|
| 11308 | 0.6536998 | 1.137974  | LOC100134368 | 0.57444176  |
| 11309 | 0.4166323 | 0.7252821 | MGC16275     | 0.57444176  |
| 11310 | 39.892373 | 69.571956 | PIP5K1A      | 0.573397321 |
| 11311 | 5.8929816 | 10.2777   | SETD2        | 0.573375511 |
| 11312 | 8.621785  | 15.041228 | AGFG1        | 0.573210185 |
| 11313 | 6.0692479 | 10.590992 | AIMP1        | 0.573057563 |
| 11314 | 6.8365975 | 11.933542 | INO80        | 0.572889215 |
| 11315 | 12.667675 | 22.114976 | SGK1         | 0.572809823 |
| 11316 | 34.007962 | 59.388809 | RPL7L1       | 0.572632495 |
| 11317 | 12.336292 | 21.54477  | CTU2         | 0.572588722 |
| 11318 | 49.745208 | 86.933538 | EI24         | 0.572221131 |
| 11319 | 83.588511 | 146.09191 | APLP2        | 0.572163873 |
| 11320 | 21.416549 | 37.441695 | MYEOV2       | 0.571997327 |
| 11321 | 7.1060813 | 12.423277 | C2orf47      | 0.571997327 |
| 11322 | 2291.528  | 4007.2824 | RPS2         | 0.5718409   |
| 11323 | 5.0142266 | 8.7687264 | SLC48A1      | 0.571830661 |
| 11324 | 5.3117009 | 9.2904376 | C7orf25      | 0.571738505 |
| 11325 | 16.871233 | 29.515545 | STX16        | 0.571605011 |
| 11326 | 1.5691608 | 2.7460804 | USP15        | 0.571418383 |
| 11327 | 6.6033791 | 11.556119 | ARMC10       | 0.571418383 |
| 11328 | 0.7876162 | 1.378353  | PGAP1        | 0.571418382 |
| 11329 | 3.2756561 | 5.7351013 | LOC100294145 | 0.571159236 |
| 11330 | 5.006139  | 8.7661393 | ZADH2        | 0.571076829 |
| 11331 | 15.367818 | 26.933263 | TATDN2       | 0.570588797 |
| 11332 | 6.1069451 | 10.704922 | FANCA        | 0.570480093 |
| 11333 | 2.3075377 | 4.0449049 | LOC283683    | 0.570480093 |
| 11334 | 3.2981128 | 5.7812933 | HRSP12       | 0.570480093 |
| 11335 | 10.849432 | 19.018072 | EIF2AK4      | 0.570480093 |
| 11336 | 13.778479 | 24.152428 | KLF16        | 0.570480093 |
| 11337 | 1.021149  | 1.7899819 | TET2         | 0.570480093 |
| 11338 | 0.3880358 | 0.6801917 | ZNF678       | 0.570480092 |
| 11339 | 30.997844 | 54.36373  | MTHFD2       | 0.570193477 |
| 11340 | 11.293736 | 19.809016 | RAP2B        | 0.570131104 |
| 11341 | 8.6698619 | 15.208634 | TONSL        | 0.570061853 |
| 11342 | 22.723214 | 39.862412 | MCCC2        | 0.570041112 |
| 11343 | 21.890704 | 38.415728 | LSM14B       | 0.569837017 |
| 11344 | 61.415747 | 107.78138 | LARP1        | 0.569817771 |
| 11345 | 7.26975   | 12.759489 | CHTF18       | 0.56975244  |
| 11346 | 6.1787553 | 10.844632 | MTMR1        | 0.56975244  |
| 11347 | 10.546929 | 18.511424 | NTHL1        | 0.56975244  |
| 11348 | 0.9076926 | 1.5931351 | RPGRIP1L     | 0.56975244  |
| 11349 | 6.8127577 | 11.95881  | FAR1         | 0.569685236 |
| 11350 | 5.0356757 | 8.8411323 | DBR1         | 0.56957361  |



|       |           |           |           |             |
|-------|-----------|-----------|-----------|-------------|
| 11351 | 58.660266 | 102.99784 | HYOU1     | 0.569529091 |
| 11352 | 11.689367 | 20.525732 | TBC1D1    | 0.5694982   |
| 11353 | 1.8453321 | 3.2421363 | LOC643837 | 0.569171652 |
| 11354 | 20.498311 | 36.014287 | XPO7      | 0.569171652 |
| 11355 | 6.5202614 | 11.456505 | CCDC14    | 0.569131795 |
| 11356 | 27.346541 | 48.06141  | POLR1D    | 0.568991649 |
| 11357 | 5.3960937 | 9.4850527 | SH3D19    | 0.568904972 |
| 11358 | 16.38567  | 28.803416 | VAPB      | 0.568879384 |
| 11359 | 437.36569 | 768.91408 | NPM1      | 0.568809571 |
| 11360 | 8.0718116 | 14.19351  | TMEM41A   | 0.568697343 |
| 11361 | 2.3249437 | 4.0881916 | HSPBAP1   | 0.568697343 |
| 11362 | 0.4010487 | 0.7052059 | SULF1     | 0.568697343 |
| 11363 | 28.536031 | 50.177887 | FAM207A   | 0.568697343 |
| 11364 | 53.320708 | 93.817396 | VPS72     | 0.568345644 |
| 11365 | 17.632011 | 31.024697 | SPDL1     | 0.5683218   |
| 11366 | 5.981616  | 10.528619 | NDUFAF1   | 0.568129214 |
| 11367 | 3.3798167 | 5.9490282 | PIK3C3    | 0.568129213 |
| 11368 | 25.853062 | 45.510804 | SH2B3     | 0.568064284 |
| 11369 | 7.1559271 | 12.600821 | TUBGCP4   | 0.56789372  |
| 11370 | 28.581124 | 50.34317  | TOP2A     | 0.567725948 |
| 11371 | 108.23618 | 190.65597 | EIF3L     | 0.567704122 |
| 11372 | 4.4189216 | 7.7841274 | TPRN      | 0.567683622 |
| 11373 | 10.654257 | 18.773729 | CKAP2     | 0.567508842 |
| 11374 | 12.168656 | 21.44497  | RABGGTA   | 0.567436373 |
| 11375 | 5.1786649 | 9.1282191 | RIOK1     | 0.567324783 |
| 11376 | 4.9203876 | 8.67428   | EEF2K     | 0.567238729 |
| 11377 | 32.821106 | 57.866002 | HPRT1     | 0.567191524 |
| 11378 | 3.3486065 | 5.9042273 | TNRC6B    | 0.567154066 |
| 11379 | 3.6114083 | 6.3689942 | TMEM42    | 0.567029609 |
| 11380 | 0.5428734 | 0.9573986 | GOLGA8A   | 0.567029608 |
| 11381 | 10.482435 | 18.489664 | LBR       | 0.566934851 |
| 11382 | 16.850696 | 29.729739 | PAPD7     | 0.566795951 |
| 11383 | 41.759727 | 73.680527 | UBQLN1    | 0.566767489 |
| 11384 | 437.32604 | 771.81326 | ANXA2     | 0.566621568 |
| 11385 | 23.487117 | 41.47669  | METTL9    | 0.566272694 |
| 11386 | 3.0944293 | 5.4666512 | KCTD7     | 0.566055749 |
| 11387 | 21.676711 | 38.296003 | WDR5      | 0.566030633 |
| 11388 | 3.932066  | 6.9499258 | OXSM      | 0.565770941 |
| 11389 | 2.4922002 | 4.4049633 | RDH13     | 0.565770941 |
| 11390 | 1.7067454 | 3.0166721 | TBCK      | 0.565770941 |
| 11391 | 4.8984328 | 8.6619826 | MCC       | 0.565509422 |
| 11392 | 476.02542 | 841.79015 | RPS9      | 0.565491793 |
| 11393 | 53.88975  | 95.300131 | VARS      | 0.565474039 |

|       |           |           |               |             |
|-------|-----------|-----------|---------------|-------------|
| 11394 | 2.7090614 | 4.7926723 | TTF1          | 0.565250692 |
| 11395 | 24.264142 | 42.930349 | TRAF7         | 0.56519787  |
| 11396 | 11.840277 | 20.950706 | OSBPL9        | 0.56514932  |
| 11397 | 48.924264 | 86.569599 | E2F4          | 0.565143701 |
| 11398 | 4.4378859 | 7.8540303 | KIAA0226      | 0.565045687 |
| 11399 | 76.495679 | 135.41109 | GDI2          | 0.564914434 |
| 11400 | 5.6371067 | 9.9809379 | DLX1          | 0.564787277 |
| 11401 | 57.73839  | 102.26964 | MCM3          | 0.564570184 |
| 11402 | 12.631675 | 22.374317 | KIF4A         | 0.564561362 |
| 11403 | 176.87864 | 313.32447 | HNRNPK        | 0.564522276 |
| 11404 | 13.386245 | 23.714973 | AP1G1         | 0.564463864 |
| 11405 | 39.148732 | 69.358571 | GRHPR         | 0.564439716 |
| 11406 | 520.09893 | 921.75941 | RPL24         | 0.564245853 |
| 11407 | 0.2346841 | 0.4161085 | ZNF286B       | 0.563997365 |
| 11408 | 0.4585248 | 0.8129909 | BEND6         | 0.563997365 |
| 11409 | 1.4218289 | 2.5209851 | CPPED1        | 0.563997365 |
| 11410 | 8.0325289 | 14.242139 | SMIM4         | 0.563997365 |
| 11411 | 3.6375185 | 6.4495311 | DTWD1         | 0.563997365 |
| 11412 | 0.7196115 | 1.2759129 | ZNF37BP       | 0.563997365 |
| 11413 | 1.5494387 | 2.7472445 | TMEM53        | 0.563997365 |
| 11414 | 0.4140387 | 0.7341147 | DKFZP434I0714 | 0.563997365 |
| 11415 | 3.5489035 | 6.2924115 | PER2          | 0.563997365 |
| 11416 | 2.0124415 | 3.5681754 | FKTN          | 0.563997364 |
| 11417 | 0.697377  | 1.2364899 | DUSP19        | 0.563997364 |
| 11418 | 0.3434213 | 0.6089059 | B3GNT7        | 0.563997364 |
| 11419 | 0.1704467 | 0.3022119 | ADAMTSL3      | 0.563997363 |
| 11420 | 27.701765 | 49.132613 | IFRD2         | 0.563816248 |
| 11421 | 32.541346 | 57.724869 | AIMP2         | 0.563731829 |
| 11422 | 8.6888823 | 15.416665 | TP53BP1       | 0.563603237 |
| 11423 | 22.148386 | 39.305718 | PGAM5         | 0.563490173 |
| 11424 | 8.2146276 | 14.580057 | USP48         | 0.563415324 |
| 11425 | 7.5671337 | 13.432406 | TRAK2         | 0.563349092 |
| 11426 | 22.792193 | 40.458382 | MRPS10        | 0.563349092 |
| 11427 | 13.234287 | 23.508691 | CCAR1         | 0.562952925 |
| 11428 | 6.4271454 | 11.417932 | DOCK5         | 0.562899239 |
| 11429 | 6.1481845 | 10.926828 | EPS15         | 0.562668749 |
| 11430 | 25.097507 | 44.604605 | CDC42BPB      | 0.562666285 |
| 11431 | 4.7922351 | 8.5171315 | ZNF462        | 0.56265834  |
| 11432 | 13.399025 | 23.843637 | R3HDM1        | 0.561953896 |
| 11433 | 15.661926 | 27.872542 | TMEM201       | 0.561912347 |
| 11434 | 22.978199 | 40.896003 | MRPL52        | 0.561869073 |
| 11435 | 9.6811504 | 17.247371 | ALG5          | 0.561311663 |
| 11436 | 1.059564  | 1.8876571 | ZNF551        | 0.561311663 |

|       |           |           |           |             |
|-------|-----------|-----------|-----------|-------------|
| 11437 | 1.6957561 | 3.0210598 | ZNF517    | 0.561311663 |
| 11438 | 0.8731181 | 1.5554961 | CEP44     | 0.561311663 |
| 11439 | 72.258698 | 128.80078 | TCP1      | 0.561011356 |
| 11440 | 7.3859448 | 13.165738 | PIGH      | 0.560997379 |
| 11441 | 11.684286 | 20.83193  | IVD       | 0.560883507 |
| 11442 | 75.229062 | 134.1362  | MAPRE1    | 0.560840863 |
| 11443 | 2.6728593 | 4.7660613 | ZNF791    | 0.560810939 |
| 11444 | 0.9482133 | 1.6907896 | STEAP2    | 0.560810939 |
| 11445 | 7.5309477 | 13.436523 | PIN4      | 0.560483363 |
| 11446 | 43.300579 | 77.262999 | POLR2A    | 0.560430986 |
| 11447 | 38.049183 | 67.921536 | MRTO4     | 0.560193205 |
| 11448 | 4.786561  | 8.5461985 | RPL21P28  | 0.560080716 |
| 11449 | 0.6212322 | 1.1091833 | DPY19L2P2 | 0.560080716 |
| 11450 | 2.1761804 | 3.887725  | TMF1      | 0.559756783 |
| 11451 | 68.491843 | 122.36834 | CCT4      | 0.559718673 |
| 11452 | 50.590092 | 90.385353 | NT5DC2    | 0.559715605 |
| 11453 | 8.7985314 | 15.721867 | ASNSD1    | 0.55963656  |
| 11454 | 8.2158585 | 14.685923 | WDR59     | 0.559437685 |
| 11455 | 19.879896 | 35.5452   | ZC3H15    | 0.559284986 |
| 11456 | 20.112975 | 35.973947 | F8A1      | 0.559098365 |
| 11457 | 11.900317 | 21.285581 | NAV1      | 0.559078783 |
| 11458 | 16.058948 | 28.736237 | MYO1B     | 0.558839638 |
| 11459 | 12.264961 | 21.94925  | GTF3C2    | 0.558787227 |
| 11460 | 1.7951244 | 3.2127924 | ZNF292    | 0.558742731 |
| 11461 | 13.43846  | 24.060441 | NXN       | 0.558529246 |
| 11462 | 23.204947 | 41.563864 | MAP1S     | 0.558296208 |
| 11463 | 9.3123676 | 16.693311 | EIF1AX    | 0.557850255 |
| 11464 | 3.5879397 | 6.4339162 | B3GNT2    | 0.557660316 |
| 11465 | 1.2435574 | 2.229955  | KIAA1731  | 0.557660315 |
| 11466 | 2.9287964 | 5.252509  | RAB3GAP2  | 0.557599489 |
| 11467 | 3.892011  | 6.9806046 | CTBP1-AS1 | 0.557546414 |
| 11468 | 2.1890704 | 3.9262568 | SNRK      | 0.557546414 |
| 11469 | 4.36029   | 7.8211522 | TMEM237   | 0.557499699 |
| 11470 | 3.5189913 | 6.3129836 | UBR1      | 0.557421264 |
| 11471 | 7.1719219 | 12.871851 | LSM5      | 0.557178744 |
| 11472 | 15.91329  | 28.565389 | IARS2     | 0.557082884 |
| 11473 | 11.729367 | 21.058914 | LSG1      | 0.556978731 |
| 11474 | 0.5777412 | 1.0376721 | LOC284023 | 0.55676663  |
| 11475 | 0.5289327 | 0.950008  | NPHP1     | 0.556766629 |
| 11476 | 0.9998605 | 1.7958341 | TSSK6     | 0.556766629 |
| 11477 | 1.3639986 | 2.449857  | TMEM260   | 0.556766629 |
| 11478 | 7.8939205 | 14.178149 | LANCL1    | 0.556766629 |
| 11479 | 3.9576682 | 7.1083071 | PPP2R3C   | 0.556766629 |

|       |           |           |              |             |
|-------|-----------|-----------|--------------|-------------|
| 11480 | 5.6215665 | 10.096809 | NME3         | 0.556766629 |
| 11481 | 15.28263  | 27.448897 | UCHL3        | 0.556766629 |
| 11482 | 0.2205953 | 0.3962078 | SKIDA1       | 0.556766628 |
| 11483 | 54.277277 | 97.538904 | H2AFX        | 0.556467988 |
| 11484 | 27.866555 | 50.079932 | RBM39        | 0.556441542 |
| 11485 | 4.4592205 | 8.0145896 | EXD2         | 0.556387876 |
| 11486 | 9.1249255 | 16.406468 | GRSF1        | 0.556178547 |
| 11487 | 4.2247602 | 7.5971472 | ABCD4        | 0.556098242 |
| 11488 | 3.2357031 | 5.8185817 | GSTCD        | 0.556098242 |
| 11489 | 8.7547381 | 15.749626 | PRR3         | 0.555869583 |
| 11490 | 85.041949 | 153.04381 | EIF3M        | 0.555670632 |
| 11491 | 2.6698213 | 4.8079445 | AP4E1        | 0.555293702 |
| 11492 | 7.2351086 | 13.034068 | GTF2F2       | 0.555092143 |
| 11493 | 16.343117 | 29.456256 | UBE2G1       | 0.554826676 |
| 11494 | 4.8619184 | 8.7629499 | TADA2A       | 0.554826676 |
| 11495 | 1.4336426 | 2.5839468 | MEIS1        | 0.554826676 |
| 11496 | 1.406377  | 2.5348042 | LOC100505738 | 0.554826676 |
| 11497 | 15.709018 | 28.313378 | SMNDC1       | 0.554826676 |
| 11498 | 12.882878 | 23.221398 | NUP50        | 0.554784783 |
| 11499 | 67.373651 | 121.4425  | HIST1H2BK    | 0.554778177 |
| 11500 | 1254.4389 | 2262.2143 | RPLP0        | 0.554518144 |
| 11501 | 2.4478671 | 4.4148576 | C2CD3        | 0.554461177 |
| 11502 | 7.0034346 | 12.631064 | SNHG11       | 0.554461177 |
| 11503 | 14.235741 | 25.690254 | NSMCE4A      | 0.554130007 |
| 11504 | 5.4275914 | 9.7967929 | TCF4         | 0.554017164 |
| 11505 | 2.0592836 | 3.7176151 | SFR1         | 0.553925983 |
| 11506 | 2.1214744 | 3.8298878 | CEP76        | 0.553925983 |
| 11507 | 7.1099147 | 12.835496 | DDX55        | 0.553925983 |
| 11508 | 2.6660917 | 4.8130829 | THUMPD2      | 0.553925983 |
| 11509 | 3.2404898 | 5.8500412 | PRPF39       | 0.553925983 |
| 11510 | 8.873458  | 16.019213 | ATAD3B       | 0.553925983 |
| 11511 | 1.6530896 | 2.984315  | LOC100506060 | 0.553925983 |
| 11512 | 7.035172  | 12.706571 | AMPD3        | 0.55366408  |
| 11513 | 7.6516616 | 13.822817 | RCOR1        | 0.553552969 |
| 11514 | 13.031282 | 23.544853 | MFAP1        | 0.553466294 |
| 11515 | 14.765684 | 26.679223 | NCOA6        | 0.553452542 |
| 11516 | 6.6169181 | 11.958419 | TTPAL        | 0.553327144 |
| 11517 | 10.369056 | 18.743084 | WWC1         | 0.553220345 |
| 11518 | 679.30816 | 1228.1261 | RPL3         | 0.553125733 |
| 11519 | 39.613128 | 71.624442 | WBSCR22      | 0.553067183 |
| 11520 | 0.729779  | 1.3195124 | KLHL28       | 0.553067183 |
| 11521 | 8.2039622 | 14.834894 | CPSF6        | 0.553017908 |
| 11522 | 8.3862978 | 15.16678  | C9orf64      | 0.552938593 |

|       |           |           |           |             |
|-------|-----------|-----------|-----------|-------------|
| 11523 | 2.9275168 | 5.29463   | ZXDC      | 0.552921888 |
| 11524 | 31.267299 | 56.556066 | NOP2      | 0.55285492  |
| 11525 | 5.5600657 | 10.057477 | SIK3      | 0.5528291   |
| 11526 | 155.41257 | 281.16039 | PGAM1     | 0.55275413  |
| 11527 | 34.569354 | 62.549332 | CSK       | 0.552673441 |
| 11528 | 7.2263809 | 13.075811 | SMEK2     | 0.55265259  |
| 11529 | 45.668841 | 82.635713 | RAE1      | 0.55265259  |
| 11530 | 6.7612606 | 12.234197 | ACSL1     | 0.55265259  |
| 11531 | 18.900061 | 34.19881  | RBM17     | 0.55265259  |
| 11532 | 11.355735 | 20.548926 | ARIH1     | 0.552619392 |
| 11533 | 4.35108   | 7.8744275 | ZFYVE26   | 0.552558265 |
| 11534 | 12.355702 | 22.36697  | GINS1     | 0.552408378 |
| 11535 | 9.0106214 | 16.311522 | C2orf49   | 0.552408378 |
| 11536 | 5.9491867 | 10.769545 | C17orf85  | 0.552408378 |
| 11537 | 20.551214 | 37.205043 | NOL11     | 0.55237711  |
| 11538 | 12.258794 | 22.199704 | BNIP2     | 0.552205305 |
| 11539 | 6.2648833 | 11.345605 | HSDL2     | 0.552185901 |
| 11540 | 9.6995817 | 17.56701  | ELMSAN1   | 0.552147562 |
| 11541 | 10.597925 | 19.198675 | ULK3      | 0.552013357 |
| 11542 | 3.9573053 | 7.1692601 | PAQR3     | 0.551982383 |
| 11543 | 18.281254 | 33.125751 | BAZ1B     | 0.551874405 |
| 11544 | 9.4468934 | 17.124328 | WDR76     | 0.551665061 |
| 11545 | 0.2472851 | 0.4484156 | KIAA1024  | 0.551464091 |
| 11546 | 0.4207966 | 0.7630534 | ITGA9     | 0.551464091 |
| 11547 | 0.8567297 | 1.5535548 | C12orf76  | 0.55146409  |
| 11548 | 4.0125054 | 7.2760956 | TMEM80    | 0.55146409  |
| 11549 | 2.0627232 | 3.7404488 | HMBOX1    | 0.55146409  |
| 11550 | 4.8421689 | 8.7805697 | TNK2      | 0.55146409  |
| 11551 | 0.7968119 | 1.4449025 | C10orf118 | 0.551464089 |
| 11552 | 21.354384 | 38.765181 | MYH10     | 0.550865073 |
| 11553 | 7.0960403 | 12.882688 | ECHDC3    | 0.550819856 |
| 11554 | 33.678444 | 61.15294  | PELP1     | 0.550724862 |
| 11555 | 1.3525266 | 2.4559473 | GTPBP10   | 0.550714818 |
| 11556 | 11.105025 | 20.178031 | NUPL1     | 0.550352267 |
| 11557 | 5.5028829 | 10.000138 | MSL2      | 0.550280691 |
| 11558 | 10.244647 | 18.618739 | SDAD1     | 0.550233143 |
| 11559 | 4.4001351 | 7.9973481 | MOCOS     | 0.550199264 |
| 11560 | 7.8910395 | 14.343734 | METTL2B   | 0.550138455 |
| 11561 | 1.7172009 | 3.122198  | DFFB      | 0.54999743  |
| 11562 | 42.723139 | 77.71243  | MRPS5     | 0.54975941  |
| 11563 | 46.147223 | 83.941718 | IGF2BP2   | 0.549753146 |
| 11564 | 125.539   | 228.39407 | HSPA9     | 0.549659652 |
| 11565 | 2.3554733 | 4.2857876 | MIER3     | 0.549601036 |

|       |           |           |              |             |
|-------|-----------|-----------|--------------|-------------|
| 11566 | 1.6470439 | 2.9983873 | TTC26        | 0.549309933 |
| 11567 | 2.8359348 | 5.1627225 | KRIT1        | 0.549309933 |
| 11568 | 2.694186  | 4.9058712 | PIKFYVE      | 0.549175857 |
| 11569 | 35.113079 | 63.998992 | ETV4         | 0.548650498 |
| 11570 | 5.9645713 | 10.87135  | SP3          | 0.548650497 |
| 11571 | 5.2597418 | 9.5893331 | ZCCHC11      | 0.548499229 |
| 11572 | 1.4605492 | 2.6636279 | FCHO2        | 0.548330771 |
| 11573 | 20.897203 | 38.113215 | ELP5         | 0.548292838 |
| 11574 | 17.116385 | 31.219587 | LDOC1        | 0.548257903 |
| 11575 | 19.462038 | 35.498622 | TLE3         | 0.548247703 |
| 11576 | 6.0068661 | 10.962854 | C9orf114     | 0.547929064 |
| 11577 | 46.311    | 84.55178  | UBE2E1       | 0.547723539 |
| 11578 | 49.177871 | 89.790099 | MRPS21       | 0.547698153 |
| 11579 | 52.87341  | 96.54934  | APH1A        | 0.547630987 |
| 11580 | 10.701596 | 19.54197  | C14orf119    | 0.547621134 |
| 11581 | 0.6381747 | 1.1658093 | LOC100506599 | 0.547409207 |
| 11582 | 18.066573 | 33.003779 | TIAL1        | 0.547409207 |
| 11583 | 1.2038482 | 2.1991742 | FAM126B      | 0.547409207 |
| 11584 | 2.4630276 | 4.4994267 | DCUN1D2      | 0.547409207 |
| 11585 | 2.3513525 | 4.2954201 | SIAH1        | 0.547409207 |
| 11586 | 0.7320826 | 1.3373589 | ANKRD42      | 0.547409207 |
| 11587 | 58.742186 | 107.39252 | NUCKS1       | 0.546985843 |
| 11588 | 15.897696 | 29.077442 | PDCD2        | 0.546736383 |
| 11589 | 37.061957 | 67.793367 | USP10        | 0.546690013 |
| 11590 | 10.294768 | 18.836247 | WDR70        | 0.546540303 |
| 11591 | 1.8250003 | 3.3422319 | MYNN         | 0.546042392 |
| 11592 | 3.2102134 | 5.8806095 | C11orf30     | 0.54589807  |
| 11593 | 141.95063 | 260.0343  | EIF4G1       | 0.545891942 |
| 11594 | 15.320694 | 28.069449 | 7-Sep        | 0.545813843 |
| 11595 | 1.7574747 | 3.2204716 | NOD1         | 0.545719672 |
| 11596 | 32.699687 | 59.945144 | C16orf13     | 0.545493514 |
| 11597 | 8.2670876 | 15.157731 | TMEM126B     | 0.545404045 |
| 11598 | 4.477333  | 8.2103755 | RNF6         | 0.545326219 |
| 11599 | 19.675745 | 36.082398 | DENR         | 0.545300372 |
| 11600 | 9.316207  | 17.089455 | TOP3A        | 0.545143584 |
| 11601 | 26.600957 | 48.806627 | CDT1         | 0.545027574 |
| 11602 | 5.8036143 | 10.648295 | LIMD1        | 0.545027574 |
| 11603 | 14.701683 | 26.978367 | MTRR         | 0.5449434   |
| 11604 | 6.7975304 | 12.473828 | ASXL2        | 0.544943399 |
| 11605 | 12.364977 | 22.694864 | PIAS1        | 0.544835916 |
| 11606 | 42.807672 | 78.576009 | KLC1         | 0.544793153 |
| 11607 | 10.941553 | 20.087527 | NCAPH        | 0.544693883 |
| 11608 | 18.903899 | 34.710037 | TRMT1        | 0.544623409 |

|       |           |           |           |             |
|-------|-----------|-----------|-----------|-------------|
| 11609 | 16.381707 | 30.09129  | MCM6      | 0.544400283 |
| 11610 | 8.019245  | 14.730748 | TIPARP    | 0.544388185 |
| 11611 | 18.38517  | 33.773419 | NAT10     | 0.544368045 |
| 11612 | 15.202163 | 27.927084 | MGAT2     | 0.544351954 |
| 11613 | 0.6363344 | 1.1692852 | INTU      | 0.544207984 |
| 11614 | 1.2039255 | 2.2122525 | STAG3L2   | 0.544207983 |
| 11615 | 0.959482  | 1.7630797 | KPNA5     | 0.544207983 |
| 11616 | 7.6150853 | 13.992969 | OSGEP     | 0.544207983 |
| 11617 | 1.5763956 | 2.8966786 | ZNF397    | 0.544207983 |
| 11618 | 1.4372379 | 2.6409718 | IL12A     | 0.544207983 |
| 11619 | 7.6430135 | 14.044288 | TMEM126A  | 0.544207983 |
| 11620 | 2.4498374 | 4.5016565 | CCDC112   | 0.544207983 |
| 11621 | 1.0260931 | 1.8854796 | SPATA7    | 0.544207983 |
| 11622 | 0.1042519 | 0.1917677 | NR2E3     | 0.543636278 |
| 11623 | 10.788614 | 19.853869 | EDEM1     | 0.543401085 |
| 11624 | 29.590514 | 54.480663 | DNTTIP1   | 0.543137911 |
| 11625 | 3.7434651 | 6.8941457 | ING5      | 0.542991876 |
| 11626 | 3.2533282 | 5.9921255 | PTAR1     | 0.542933918 |
| 11627 | 3.473325  | 6.3983444 | PYGO1     | 0.542847463 |
| 11628 | 2.0810221 | 3.8335301 | PTCD2     | 0.542847463 |
| 11629 | 1.6372576 | 3.0160546 | LOC646719 | 0.542847463 |
| 11630 | 0.9586834 | 1.7660271 | ZNF548    | 0.542847463 |
| 11631 | 1.8957719 | 3.4922737 | AP4S1     | 0.542847463 |
| 11632 | 6.6306909 | 12.222846 | RAD1      | 0.54248338  |
| 11633 | 27.864    | 51.369437 | CCDC58    | 0.542423695 |
| 11634 | 15.236218 | 28.090869 | NSMF      | 0.542390393 |
| 11635 | 23.614835 | 43.595676 | HSPH1     | 0.541678374 |
| 11636 | 2.1464368 | 3.9630195 | TMEM170A  | 0.541616517 |
| 11637 | 3.1401615 | 5.8022472 | CSNK1G1   | 0.541197471 |
| 11638 | 48.191488 | 89.0528   | FHL1      | 0.54115635  |
| 11639 | 19.690207 | 36.387809 | SMG7      | 0.541120985 |
| 11640 | 84.407468 | 156.00503 | VCP       | 0.541056059 |
| 11641 | 3.3290655 | 6.1530404 | DNAJB5    | 0.541043984 |
| 11642 | 1.3017737 | 2.4060404 | KIAA2026  | 0.541043983 |
| 11643 | 4.7269521 | 8.7430736 | MFN1      | 0.540651068 |
| 11644 | 65.015433 | 120.283   | FUS       | 0.540520551 |
| 11645 | 1.4825823 | 2.7429958 | TMEM154   | 0.540497474 |
| 11646 | 7.3346419 | 13.570169 | ITCH      | 0.540497474 |
| 11647 | 13.569009 | 25.10682  | FBXO11    | 0.540451124 |
| 11648 | 3.3674896 | 6.2343979 | MIR31HG   | 0.54014673  |
| 11649 | 21.9945   | 40.733749 | PBX2      | 0.539957661 |
| 11650 | 6.4850055 | 12.012082 | TMCO6     | 0.539873583 |
| 11651 | 3.969161  | 7.3544515 | AMMECR1   | 0.539695039 |

|       |           |           |          |             |
|-------|-----------|-----------|----------|-------------|
| 11652 | 3.9915565 | 7.3962513 | LYRM7    | 0.539672917 |
| 11653 | 1.0376739 | 1.9234857 | NUDT3    | 0.53947574  |
| 11654 | 3.243572  | 6.012452  | GNPDA2   | 0.53947574  |
| 11655 | 4.8192551 | 8.9353651 | MRPL19   | 0.539346183 |
| 11656 | 160.19273 | 297.01788 | LDHB     | 0.539336986 |
| 11657 | 3.2173725 | 5.9665605 | TRAPPC8  | 0.539234039 |
| 11658 | 5.1226399 | 9.5019406 | USP13    | 0.539115128 |
| 11659 | 2.8985454 | 5.3776604 | CBR4     | 0.538997481 |
| 11660 | 3.2804856 | 6.0880226 | KIAA0753 | 0.538842553 |
| 11661 | 0.01      | 0.0185639 | SLC24A2  | 0.538681014 |
| 11662 | 4.9827731 | 9.2523878 | TMEM87B  | 0.53853915  |
| 11663 | 29.02637  | 53.907864 | TARDBP   | 0.538444086 |
| 11664 | 6.6662445 | 12.382478 | PMPCB    | 0.538361121 |
| 11665 | 17.233501 | 32.022933 | RBMS1    | 0.538161228 |
| 11666 | 7.480007  | 13.902021 | SCFD2    | 0.538051784 |
| 11667 | 5.139898  | 9.5544783 | PPP1R13L | 0.537956946 |
| 11668 | 1.9481318 | 3.6213526 | C12orf5  | 0.537956946 |
| 11669 | 5.4082915 | 10.054146 | FBXO34   | 0.537916562 |
| 11670 | 91.30784  | 169.74858 | TOMM6    | 0.537900452 |
| 11671 | 5.4095636 | 10.057075 | CRLS1    | 0.537886376 |
| 11672 | 8.9262918 | 16.597767 | MED1     | 0.537800766 |
| 11673 | 2.540436  | 4.7248323 | INTS6    | 0.537677488 |
| 11674 | 2.8556289 | 5.3156129 | KIAA1432 | 0.537215367 |
| 11675 | 8.7422681 | 16.274353 | COPS2    | 0.537180673 |
| 11676 | 5.0027827 | 9.3155401 | AP4B1    | 0.53703625  |
| 11677 | 6.322232  | 11.775829 | N6AMT2   | 0.536882107 |
| 11678 | 13.295128 | 24.765936 | FAM43A   | 0.536831251 |
| 11679 | 32.720259 | 60.952826 | POP7     | 0.536812823 |
| 11680 | 3.0477544 | 5.6794293 | ZSCAN29  | 0.536630404 |
| 11681 | 15.454612 | 28.800762 | METAP2   | 0.536604279 |
| 11682 | 12.492613 | 23.285092 | LTV1     | 0.536506927 |
| 11683 | 3.0911468 | 5.7616159 | PNMAL1   | 0.536506927 |
| 11684 | 12.494938 | 23.294719 | RNF44    | 0.536384994 |
| 11685 | 8.9818153 | 16.752566 | MTMR4    | 0.536145643 |
| 11686 | 9.3662697 | 17.469637 | EIF2AK2  | 0.536145643 |
| 11687 | 0.7574229 | 1.4127186 | DDX26B   | 0.536145643 |
| 11688 | 2.4968703 | 4.6570748 | DDX59    | 0.536145643 |
| 11689 | 1.5347675 | 2.8625944 | RNPC3    | 0.536145643 |
| 11690 | 7.383641  | 13.771708 | FAM204A  | 0.536145643 |
| 11691 | 0.5984806 | 1.116265  | KIAA1328 | 0.536145643 |
| 11692 | 2.1249767 | 3.9634318 | CCDC82   | 0.536145643 |
| 11693 | 3.351244  | 6.2506224 | DNMT3B   | 0.536145643 |
| 11694 | 15.705147 | 29.300382 | YRDC     | 0.536004849 |



|       |           |           |           |             |
|-------|-----------|-----------|-----------|-------------|
| 11695 | 7.5619247 | 14.108349 | RPP14     | 0.535989332 |
| 11696 | 3.6000887 | 6.7182616 | SIRT1     | 0.535866109 |
| 11697 | 25.299299 | 47.21425  | POLR2B    | 0.535840321 |
| 11698 | 31.316029 | 58.451835 | UHRF1     | 0.535757834 |
| 11699 | 32.550312 | 60.786651 | LINC00657 | 0.535484551 |
| 11700 | 65.914098 | 123.11714 | G3BP1     | 0.535377085 |
| 11701 | 39.964357 | 74.661317 | NOP16     | 0.535275277 |
| 11702 | 61.537321 | 115.02731 | SNRPF     | 0.534980109 |
| 11703 | 3.6630324 | 6.8474437 | HCG18     | 0.534948889 |
| 11704 | 21.971744 | 41.080327 | EIF4EBP2  | 0.534848315 |
| 11705 | 0.6064001 | 1.1338288 | KIAA1009  | 0.534825088 |
| 11706 | 1.4084219 | 2.6334254 | CEP97     | 0.534825087 |
| 11707 | 0.8971136 | 1.6773963 | PAX6      | 0.534825087 |
| 11708 | 4.2205119 | 7.8913874 | AKTIP     | 0.534825087 |
| 11709 | 7.1033915 | 13.28816  | YTHDC1    | 0.534565463 |
| 11710 | 5.3167585 | 9.9467361 | AARS2     | 0.534522926 |
| 11711 | 2.7045781 | 5.0607303 | CTC1      | 0.534424469 |
| 11712 | 14.738555 | 27.578368 | PFKFB3    | 0.534424469 |
| 11713 | 4.5975887 | 8.6082914 | COG5      | 0.534088414 |
| 11714 | 1.2231239 | 2.2903164 | ZNF407    | 0.534041461 |
| 11715 | 45.490909 | 85.191289 | AHCYL1    | 0.533985457 |
| 11716 | 4.1086999 | 7.6957376 | TRIM24    | 0.53389293  |
| 11717 | 695.85756 | 1303.5734 | MT2A      | 0.533807725 |
| 11718 | 85.879872 | 160.8901  | IRAK1     | 0.533779705 |
| 11719 | 21.999771 | 41.217603 | ABT1      | 0.533746966 |
| 11720 | 6.2301794 | 11.674109 | ATRIP     | 0.533674926 |
| 11721 | 8.1445823 | 15.261317 | NOP9      | 0.533674926 |
| 11722 | 20.621834 | 38.64119  | OAT       | 0.533674926 |
| 11723 | 1.0707746 | 2.0064172 | PIBF1     | 0.533674926 |
| 11724 | 32.462322 | 60.848123 | CMIP      | 0.533497507 |
| 11725 | 9.0728015 | 17.017232 | SNHG12    | 0.533153759 |
| 11726 | 25.286969 | 47.435424 | METTL5    | 0.533081953 |
| 11727 | 7.0108011 | 13.161766 | CRYL1     | 0.532664178 |
| 11728 | 0.9065485 | 1.7019138 | GPR137C   | 0.532664178 |
| 11729 | 4.7379358 | 8.8947896 | PDHX      | 0.532664178 |
| 11730 | 1.5915505 | 2.9879061 | ZUFSP     | 0.532664178 |
| 11731 | 3.1671657 | 5.9473972 | FAM105B   | 0.5325297   |
| 11732 | 1.7924657 | 3.3689432 | INTS2     | 0.532055766 |
| 11733 | 8.8442107 | 16.624987 | RPP38     | 0.531983022 |
| 11734 | 18.747235 | 35.249791 | SDCCAG3   | 0.53183962  |
| 11735 | 4.0670665 | 7.6481836 | CEP78     | 0.531768944 |
| 11736 | 22.161508 | 41.685994 | PCBD1     | 0.531629591 |
| 11737 | 3.2241835 | 6.0662784 | NLK       | 0.531492844 |

|       |           |           |           |             |
|-------|-----------|-----------|-----------|-------------|
| 11738 | 3.4795945 | 6.548486  | ACAD8     | 0.531358628 |
| 11739 | 2.9725449 | 5.5942348 | TMEM161B  | 0.531358628 |
| 11740 | 12.769948 | 24.04251  | NMD3      | 0.531140375 |
| 11741 | 27.241177 | 51.299927 | UBL4A     | 0.531017858 |
| 11742 | 2.6327065 | 4.9582915 | CCDC28A   | 0.530970492 |
| 11743 | 2.4351725 | 4.5862671 | ANKRD9    | 0.530970492 |
| 11744 | 19.542339 | 36.81688  | PNMA1     | 0.530798341 |
| 11745 | 8.9890629 | 16.943503 | FOXD1     | 0.530531552 |
| 11746 | 41.125566 | 77.518403 | BUB3      | 0.530526493 |
| 11747 | 24.387908 | 45.972897 | RNF220    | 0.530484478 |
| 11748 | 11.957348 | 22.556584 | TCHP      | 0.530104565 |
| 11749 | 5.1627671 | 9.7424941 | EBAG9     | 0.529922524 |
| 11750 | 39.615209 | 74.758585 | CTBP1     | 0.52990849  |
| 11751 | 5.3871091 | 10.167383 | ANKRD28   | 0.529842245 |
| 11752 | 10.313286 | 19.466908 | FAM83G    | 0.52978551  |
| 11753 | 1.722988  | 3.2533314 | C5orf34   | 0.529607282 |
| 11754 | 1.8504818 | 3.4940642 | HNRNPA1L2 | 0.529607281 |
| 11755 | 2.3643379 | 4.4643229 | MRM1      | 0.529607281 |
| 11756 | 0.9275942 | 1.7514756 | RPGR      | 0.529607281 |
| 11757 | 24.067724 | 45.465192 | PWP1      | 0.529365947 |
| 11758 | 9.8363033 | 18.581638 | KIAA0317  | 0.529356092 |
| 11759 | 58.709867 | 110.93867 | SNHG16    | 0.529210126 |
| 11760 | 5.6090963 | 10.598997 | ZNF131    | 0.529210125 |
| 11761 | 25.616882 | 48.421741 | SMAD3     | 0.529036783 |
| 11762 | 4.1819298 | 7.9050387 | TTC13     | 0.529020784 |
| 11763 | 1.541883  | 2.9145981 | FLVCR1    | 0.529020784 |
| 11764 | 29.341446 | 55.480229 | FAM96A    | 0.528863103 |
| 11765 | 12.21928  | 23.10917  | EIF4G3    | 0.528763259 |
| 11766 | 15.725004 | 29.747526 | RFX5      | 0.528615507 |
| 11767 | 12.406411 | 23.47892  | KIAA0368  | 0.528406358 |
| 11768 | 34.663584 | 65.604113 | NUP98     | 0.528375172 |
| 11769 | 0.7710171 | 1.4602665 | AKAP5     | 0.527997533 |
| 11770 | 4.4498114 | 8.4277125 | TTC8      | 0.527997533 |
| 11771 | 1.9867281 | 3.7627602 | ITGA11    | 0.527997533 |
| 11772 | 9.1269854 | 17.286038 | MTFR1     | 0.527997533 |
| 11773 | 0.899728  | 1.7040383 | ZNF286A   | 0.527997533 |
| 11774 | 0.3847375 | 0.7290718 | ALG1L9P   | 0.527708714 |
| 11775 | 8.4171911 | 15.953655 | FAM193A   | 0.527602663 |
| 11776 | 15.919883 | 30.195677 | HTATSF1   | 0.52722391  |
| 11777 | 4.7404961 | 8.9929486 | TST       | 0.527134792 |
| 11778 | 45.16286  | 85.6788   | FUBP1     | 0.527118255 |
| 11779 | 1.6726476 | 3.1753971 | C19orf44  | 0.526752256 |
| 11780 | 0.709915  | 1.3477209 | GAB1      | 0.526752255 |

|       |           |           |          |             |
|-------|-----------|-----------|----------|-------------|
| 11781 | 9.1854208 | 17.440857 | PTDSS2   | 0.526661091 |
| 11782 | 13.59589  | 25.818396 | PREP     | 0.526597009 |
| 11783 | 8.9372105 | 16.97245  | FANCE    | 0.526571613 |
| 11784 | 8.0246618 | 15.24115  | KDELC2   | 0.526512877 |
| 11785 | 4.4532379 | 8.4584523 | CHD6     | 0.526483778 |
| 11786 | 132.21235 | 251.1583  | RPL13    | 0.526410457 |
| 11787 | 130.47398 | 247.90633 | RPS10    | 0.526303541 |
| 11788 | 4.3447246 | 8.2613252 | AEBP2    | 0.525911336 |
| 11789 | 6.9727652 | 13.259727 | MBD4     | 0.5258604   |
| 11790 | 52.474694 | 99.807267 | TAF10    | 0.525760255 |
| 11791 | 81.140933 | 154.35171 | CD44     | 0.525688593 |
| 11792 | 1.7049173 | 3.2462008 | LRRC8B   | 0.525203895 |
| 11793 | 43.9245   | 83.650778 | RARS     | 0.525093743 |
| 11794 | 9.8264937 | 18.724567 | MGME1    | 0.524791518 |
| 11795 | 86.31932  | 164.48579 | KARS     | 0.524782824 |
| 11796 | 2.9364206 | 5.5962311 | NUDT11   | 0.524713966 |
| 11797 | 3.1353987 | 5.9779917 | KIAA0754 | 0.524490303 |
| 11798 | 11.658997 | 22.237053 | PRKAA1   | 0.524304971 |
| 11799 | 87.213638 | 166.42565 | HNRNPU   | 0.524039653 |
| 11800 | 5.3417747 | 10.19635  | MTIF2    | 0.523890885 |
| 11801 | 7.2508524 | 13.843568 | CCDC8    | 0.523770478 |
| 11802 | 1.8658357 | 3.5627145 | LZTFL1   | 0.523711838 |
| 11803 | 3.7006984 | 7.0670652 | SENP6    | 0.523654206 |
| 11804 | 3.3437545 | 6.386795  | SLC36A4  | 0.523541857 |
| 11805 | 14.991878 | 28.638487 | NOC4L    | 0.523487094 |
| 11806 | 23.39471  | 44.695872 | OLA1     | 0.523419914 |
| 11807 | 723.49002 | 1382.5618 | HSP90AB1 | 0.52329668  |
| 11808 | 1.3610538 | 2.6019998 | FZD5     | 0.523079909 |
| 11809 | 5.9017245 | 11.282644 | PBRM1    | 0.523079909 |
| 11810 | 1.8071695 | 3.4557869 | ZNF12    | 0.522940085 |
| 11811 | 2.6452475 | 5.0609421 | MPHOSPH9 | 0.522678876 |
| 11812 | 1.6788751 | 3.2120585 | MME      | 0.522678876 |
| 11813 | 3.9893371 | 7.6324819 | PARS2    | 0.522678876 |
| 11814 | 100.16566 | 191.66968 | TPD52L2  | 0.522595219 |
| 11815 | 5.620267  | 10.762264 | TGS1     | 0.522219782 |
| 11816 | 7.9265689 | 15.183073 | GTPBP3   | 0.522066188 |
| 11817 | 6.082144  | 11.653372 | LAGE3    | 0.521921371 |
| 11818 | 5.2796726 | 10.117036 | ANKS1A   | 0.52185963  |
| 11819 | 3.818839  | 7.3206188 | SMAD1    | 0.52165522  |
| 11820 | 7.2748547 | 13.950047 | MRPL35   | 0.521493215 |
| 11821 | 17.370031 | 33.321207 | PTP4A1   | 0.521290565 |
| 11822 | 4.5362677 | 8.7092588 | USP54    | 0.520855775 |
| 11823 | 3.4775556 | 6.6773465 | PPM1A    | 0.520799037 |

|       |           |           |           |             |
|-------|-----------|-----------|-----------|-------------|
| 11824 | 23.758901 | 45.627281 | GRWD1     | 0.520716991 |
| 11825 | 34.476552 | 66.227775 | PSRC1     | 0.520575422 |
| 11826 | 1.63922   | 3.1495154 | RICTOR    | 0.520467367 |
| 11827 | 4.4334194 | 8.5196355 | ARFGEF1   | 0.520376653 |
| 11828 | 132.76347 | 255.24804 | FBL       | 0.520135129 |
| 11829 | 6.1915266 | 11.905483 | SHQ1      | 0.520056741 |
| 11830 | 2.2809896 | 4.3869245 | TRAF6     | 0.519951856 |
| 11831 | 2.3198944 | 4.4620349 | CEP192    | 0.519918474 |
| 11832 | 15.742714 | 30.285671 | RSRC2     | 0.519807354 |
| 11833 | 73.057344 | 140.5531  | C14orf166 | 0.519784633 |
| 11834 | 19.852521 | 38.198594 | BYSL      | 0.519718624 |
| 11835 | 3.4463288 | 6.632714  | KAZN      | 0.519595562 |
| 11836 | 14.632003 | 28.164491 | LIX1L     | 0.519519524 |
| 11837 | 5.4939168 | 10.581932 | AGGF1     | 0.519179009 |
| 11838 | 3.6432452 | 7.0185138 | CCNT1     | 0.519090692 |
| 11839 | 7.324007  | 14.128342 | KIF1B     | 0.518391109 |
| 11840 | 148.1671  | 286.03564 | NUDC      | 0.518002243 |
| 11841 | 25.464377 | 49.196261 | ALDH18A1  | 0.517607971 |
| 11842 | 9.8797119 | 19.088967 | BCAT1     | 0.517561376 |
| 11843 | 0.0318022 | 0.0615132 | ADCY2     | 0.516997592 |
| 11844 | 0.0197385 | 0.0381792 | TMEM178B  | 0.516997592 |
| 11845 | 0.0412183 | 0.0797262 | TRIL      | 0.516997592 |
| 11846 | 0.0261152 | 0.0505132 | GPR179    | 0.516997591 |
| 11847 | 0.0419822 | 0.0812038 | PCDH11Y   | 0.51699759  |
| 11848 | 0.0537944 | 0.1040515 | LOC440354 | 0.51699759  |
| 11849 | 0.0371876 | 0.07193   | FAM83H    | 0.516997589 |
| 11850 | 0.0482965 | 0.0934173 | NEURL     | 0.516997589 |
| 11851 | 0.0718619 | 0.1389985 | MFAP5     | 0.516997588 |
| 11852 | 0.0858318 | 0.1660196 | VENTX     | 0.516997588 |
| 11853 | 0.0420245 | 0.0812857 | OPRK1     | 0.516997588 |
| 11854 | 0.0797549 | 0.1542655 | DLX3      | 0.516997588 |
| 11855 | 0.0681936 | 0.131903  | CALHM1    | 0.516997588 |
| 11856 | 0.0868693 | 0.1680266 | PLA2G4E   | 0.516997588 |
| 11857 | 0.0227262 | 0.0439581 | FLG2      | 0.516997588 |
| 11858 | 0.0674214 | 0.1304095 | LOC728342 | 0.516997588 |
| 11859 | 0.0624886 | 0.1208683 | GAL3ST3   | 0.516997587 |
| 11860 | 0.1066528 | 0.2062926 | ANXA8L1   | 0.516997587 |
| 11861 | 0.058261  | 0.112691  | IGSF11    | 0.516997587 |
| 11862 | 0.072689  | 0.1405984 | C2        | 0.516997587 |
| 11863 | 0.0854797 | 0.1653387 | UCP3      | 0.516997587 |
| 11864 | 0.0493955 | 0.0955429 | SRL       | 0.516997586 |
| 11865 | 0.0940431 | 0.1819024 | ASPRV1    | 0.516997586 |
| 11866 | 0.0270087 | 0.0522415 | POM121L8P | 0.516997586 |

|       |           |           |              |             |
|-------|-----------|-----------|--------------|-------------|
| 11867 | 0.1005304 | 0.1944504 | TRIM54       | 0.516997586 |
| 11868 | 0.2148448 | 0.4155626 | LOC100507410 | 0.516997586 |
| 11869 | 0.0923757 | 0.1786772 | FBXW4P1      | 0.516997586 |
| 11870 | 0.0686654 | 0.1328157 | FNDC5        | 0.516997586 |
| 11871 | 0.0957278 | 0.1851611 | TBC1D3G      | 0.516997586 |
| 11872 | 0.0996174 | 0.1926844 | LOC400084    | 0.516997586 |
| 11873 | 0.084304  | 0.1630646 | TIGD4        | 0.516997586 |
| 11874 | 0.0942558 | 0.1823137 | MGC2889      | 0.516997585 |
| 11875 | 0.0508168 | 0.098292  | RUNDC3B      | 0.516997585 |
| 11876 | 0.1546564 | 0.2991434 | STAR         | 0.516997585 |
| 11877 | 0.2053197 | 0.3971386 | RHPN1-AS1    | 0.516997585 |
| 11878 | 0.0717135 | 0.1387115 | ANKS4B       | 0.516997585 |
| 11879 | 0.0655344 | 0.1267597 | ENPP3        | 0.516997585 |
| 11880 | 0.0409912 | 0.0792871 | GLDN         | 0.516997585 |
| 11881 | 0.172231  | 0.3331369 | SUMO1P3      | 0.516997585 |
| 11882 | 0.2341567 | 0.4529165 | LINC00114    | 0.516997585 |
| 11883 | 0.1170784 | 0.2264583 | LRG1         | 0.516997585 |
| 11884 | 0.1474525 | 0.2852092 | P2RY8        | 0.516997585 |
| 11885 | 0.1987597 | 0.3844499 | NUTMG        | 0.516997585 |
| 11886 | 0.0648412 | 0.1254187 | LINC00617    | 0.516997585 |
| 11887 | 0.1187462 | 0.2296842 | MAGEA1       | 0.516997585 |
| 11888 | 0.2846016 | 0.5504892 | GPLD1        | 0.516997585 |
| 11889 | 0.2121115 | 0.4102755 | GHRLOS       | 0.516997585 |
| 11890 | 0.1046182 | 0.2023573 | PCAT1        | 0.516997585 |
| 11891 | 0.1583583 | 0.3063037 | PRSS35       | 0.516997585 |
| 11892 | 0.3394129 | 0.6565076 | PMS2L2       | 0.516997585 |
| 11893 | 0.105412  | 0.2038926 | P2RY11       | 0.516997585 |
| 11894 | 0.2304212 | 0.445691  | ADAMTS17     | 0.516997585 |
| 11895 | 0.1074778 | 0.2078884 | HSD11B2      | 0.516997585 |
| 11896 | 0.3360198 | 0.6499447 | PRICKLE2-AS3 | 0.516997585 |
| 11897 | 0.1890245 | 0.3656197 | ANKRD65      | 0.516997585 |
| 11898 | 0.0439754 | 0.0850592 | LSAMP        | 0.516997585 |
| 11899 | 0.2454647 | 0.4747888 | BOK-AS1      | 0.516997585 |
| 11900 | 0.1049872 | 0.2030709 | LOC256880    | 0.516997585 |
| 11901 | 0.1353244 | 0.2617505 | LRP4-AS1     | 0.516997585 |
| 11902 | 0.2328486 | 0.4503863 | LOC100289656 | 0.516997585 |
| 11903 | 0.1269696 | 0.2455904 | LINC00261    | 0.516997585 |
| 11904 | 0.1241952 | 0.2402239 | PGAM4        | 0.516997585 |
| 11905 | 0.196789  | 0.380638  | LOC554206    | 0.516997585 |
| 11906 | 0.2451759 | 0.4742302 | SIGLEC10     | 0.516997585 |
| 11907 | 0.2682104 | 0.5187847 | SPG20OS      | 0.516997585 |
| 11908 | 0.1157775 | 0.2239421 | FRMD8P1      | 0.516997585 |
| 11909 | 0.1490697 | 0.2883374 | RP1-177G6.2  | 0.516997585 |

|       |           |           |               |             |
|-------|-----------|-----------|---------------|-------------|
| 11910 | 0.0815335 | 0.1577057 | TIPARP-AS1    | 0.516997585 |
| 11911 | 0.147644  | 0.2855797 | ZNF491        | 0.516997585 |
| 11912 | 0.3026863 | 0.5854694 | LOC100288846  | 0.516997585 |
| 11913 | 0.0978861 | 0.1893357 | LOC440925     | 0.516997585 |
| 11914 | 0.5878688 | 1.1370824 | RBM12B-AS1    | 0.516997585 |
| 11915 | 0.390062  | 0.7544755 | CPEB3         | 0.516997585 |
| 11916 | 0.2656463 | 0.513825  | WDFY3-AS2     | 0.516997585 |
| 11917 | 0.278237  | 0.5381785 | SSTR2         | 0.516997585 |
| 11918 | 0.087306  | 0.1688713 | AGAP9         | 0.516997585 |
| 11919 | 0.9908059 | 1.9164613 | LOC254896     | 0.516997585 |
| 11920 | 0.1535737 | 0.2970491 | RFPL3S        | 0.516997585 |
| 11921 | 0.2097278 | 0.4056649 | AIPL1         | 0.516997584 |
| 11922 | 0.3774214 | 0.7300254 | ZNF782        | 0.516997584 |
| 11923 | 0.8140605 | 1.5745926 | EAF2          | 0.516997584 |
| 11924 | 0.8140605 | 1.5745926 | LOC255512     | 0.516997584 |
| 11925 | 0.9693    | 1.8748637 | ZSCAN16       | 0.516997584 |
| 11926 | 0.6432083 | 1.2441225 | ZNF107        | 0.516997584 |
| 11927 | 0.3924661 | 0.7591256 | DKFZp566F0947 | 0.516997584 |
| 11928 | 0.6402125 | 1.2383279 | ALG10B        | 0.516997584 |
| 11929 | 1.0400714 | 2.011753  | KANSL1L       | 0.516997584 |
| 11930 | 1.0687154 | 2.0671574 | LOC728819     | 0.516997584 |
| 11931 | 0.4261748 | 0.8243266 | HM13-AS1      | 0.516997584 |
| 11932 | 0.7016818 | 1.3572246 | EFNA3         | 0.516997584 |
| 11933 | 1.8174375 | 3.5153694 | DDT           | 0.516997584 |
| 11934 | 2.019375  | 3.905966  | ENTPD5        | 0.516997584 |
| 11935 | 3.5061956 | 6.7818413 | B3GALNT2      | 0.516997584 |
| 11936 | 0.7616513 | 1.4732201 | FAM171B       | 0.516997584 |
| 11937 | 2.4984425 | 4.8326    | SRFBP1        | 0.516997584 |
| 11938 | 1.857945  | 3.5937209 | LOC100506233  | 0.516997584 |
| 11939 | 0.4801832 | 0.9287919 | NS3BP         | 0.516997584 |
| 11940 | 3.992916  | 7.7232779 | FKBPL         | 0.516997584 |
| 11941 | 7.0817855 | 13.697908 | FARP2         | 0.516997584 |
| 11942 | 1.0632628 | 2.0566107 | FAM200A       | 0.516997584 |
| 11943 | 0.1601226 | 0.3097162 | BSN-AS2       | 0.516997584 |
| 11944 | 1.2139777 | 2.3481303 | HIST2H2BA     | 0.516997584 |
| 11945 | 0.1905367 | 0.3685446 | GOLGA6L9      | 0.516997584 |
| 11946 | 0.5700651 | 1.1026455 | ARHGAP6       | 0.516997584 |
| 11947 | 4.1737469 | 8.0730491 | ZZZ3          | 0.516997584 |
| 11948 | 4.3042926 | 8.3255565 | PIGF          | 0.516997584 |
| 11949 | 0.3359927 | 0.6498923 | LOC100507266  | 0.516997584 |
| 11950 | 2.0973417 | 4.0567728 | NUDT17        | 0.516997584 |
| 11951 | 0.935514  | 1.8095133 | THNSL1        | 0.516997584 |
| 11952 | 4.2327258 | 8.1871288 | DIRC2         | 0.516997584 |

|       |           |           |              |             |
|-------|-----------|-----------|--------------|-------------|
| 11953 | 0.7799382 | 1.5085917 | SFN          | 0.516997584 |
| 11954 | 3.1345873 | 6.0630599 | AUNIP        | 0.516997584 |
| 11955 | 1.2231385 | 2.3658495 | THAP6        | 0.516997584 |
| 11956 | 2.1086624 | 4.0786697 | BCL2L11      | 0.516997584 |
| 11957 | 2.4164676 | 4.6740404 | ARL15        | 0.516997584 |
| 11958 | 2.9067733 | 5.6224119 | KLHL17       | 0.516997584 |
| 11959 | 2.6049938 | 5.0386962 | SNORD14E     | 0.516997584 |
| 11960 | 0.6089102 | 1.1777814 | FNDC8        | 0.516997584 |
| 11961 | 1.362898  | 2.6361787 | TMEM187      | 0.516997584 |
| 11962 | 3.7544826 | 7.2620893 | DMTF1        | 0.516997584 |
| 11963 | 0.5505931 | 1.064982  | C9orf169     | 0.516997584 |
| 11964 | 2.8310557 | 5.4759553 | PHF16        | 0.516997584 |
| 11965 | 0.7850308 | 1.5184418 | LOC729732    | 0.516997584 |
| 11966 | 0.6111422 | 1.1820988 | LOC389634    | 0.516997584 |
| 11967 | 2.3681761 | 4.5806329 | SNORD14C     | 0.516997584 |
| 11968 | 0.8208295 | 1.5876854 | CISH         | 0.516997584 |
| 11969 | 0.4491369 | 0.8687407 | FLJ35024     | 0.516997584 |
| 11970 | 15.662754 | 30.295604 | PAQR4        | 0.516997584 |
| 11971 | 2.9182797 | 5.6446679 | SLC35G1      | 0.516997584 |
| 11972 | 0.3081921 | 0.596119  | SLC40A1      | 0.516997584 |
| 11973 | 0.1500356 | 0.2902057 | CLDN6        | 0.516997584 |
| 11974 | 0.196975  | 0.3809978 | LOC388948    | 0.516997584 |
| 11975 | 0.1575204 | 0.3046831 | LRRC69       | 0.516997584 |
| 11976 | 0.0787602 | 0.1523415 | SLC44A4      | 0.516997584 |
| 11977 | 0.2622477 | 0.5072513 | LFNG         | 0.516997584 |
| 11978 | 1.9716942 | 3.8137396 | KIF14        | 0.516997584 |
| 11979 | 0.3599301 | 0.6961929 | RPS6KA2-IT1  | 0.516997584 |
| 11980 | 0.6627881 | 1.2819945 | SLC5A10      | 0.516997584 |
| 11981 | 0.0549577 | 0.1063016 | APOBR        | 0.516997584 |
| 11982 | 1.4874495 | 2.8770917 | ASTE1        | 0.516997584 |
| 11983 | 1.2490519 | 2.4159724 | CCDC163P     | 0.516997584 |
| 11984 | 1.2831763 | 2.4819774 | AASDH        | 0.516997584 |
| 11985 | 0.1004819 | 0.1943567 | SOX3         | 0.516997584 |
| 11986 | 0.0856906 | 0.1657466 | ASAH2        | 0.516997584 |
| 11987 | 0.4283649 | 0.8285626 | LOC100128531 | 0.516997584 |
| 11988 | 0.0552344 | 0.1068369 | RPL34-AS1    | 0.516997584 |
| 11989 | 0.3473325 | 0.6718262 | LOC100130093 | 0.516997584 |
| 11990 | 0.4394296 | 0.8499646 | LOC100128398 | 0.516997584 |
| 11991 | 0.3971405 | 0.7681671 | RAET1E       | 0.516997584 |
| 11992 | 0.999518  | 1.9333127 | LINC00662    | 0.516997584 |
| 11993 | 0.9646811 | 1.8659297 | SHPRH        | 0.516997584 |
| 11994 | 0.4271828 | 0.8262763 | RALGPS1      | 0.516997584 |
| 11995 | 0.099665  | 0.1927765 | KRT86        | 0.516997584 |

|       |           |           |              |             |
|-------|-----------|-----------|--------------|-------------|
| 11996 | 0.3136185 | 0.606615  | LOC113230    | 0.516997584 |
| 11997 | 0.370159  | 0.7159781 | LOC391322    | 0.516997584 |
| 11998 | 0.2738495 | 0.5296921 | LOC100132111 | 0.516997584 |
| 11999 | 0.0528396 | 0.1022048 | HAP1         | 0.516997584 |
| 12000 | 0.0850263 | 0.1644617 | DNAAF1       | 0.516997584 |
| 12001 | 0.3479124 | 0.6729477 | PCBP1-AS1    | 0.516997584 |
| 12002 | 0.5988491 | 1.158321  | SCARNA9L     | 0.516997584 |
| 12003 | 0.0394696 | 0.0763439 | SLC26A7      | 0.516997584 |
| 12004 | 0.1283248 | 0.2482116 | LOC339568    | 0.516997584 |
| 12005 | 0.325726  | 0.6300339 | LNX1         | 0.516997584 |
| 12006 | 0.2710007 | 0.5241817 | LOH12CR2     | 0.516997584 |
| 12007 | 0.3157568 | 0.6107511 | MURC         | 0.516997583 |
| 12008 | 0.0945122 | 0.1828098 | SLC6A4       | 0.516997583 |
| 12009 | 0.1716635 | 0.3320393 | TPI1P3       | 0.516997583 |
| 12010 | 0.3414146 | 0.6603796 | CYP2B6       | 0.516997583 |
| 12011 | 0.1196323 | 0.2313982 | HCG27        | 0.516997583 |
| 12012 | 0.1358979 | 0.2628599 | RNF222       | 0.516997583 |
| 12013 | 0.2678657 | 0.5181179 | APCDD1L      | 0.516997583 |
| 12014 | 0.1396779 | 0.2701714 | CDC20B       | 0.516997583 |
| 12015 | 0.1975351 | 0.3820812 | ST8SIA4      | 0.516997583 |
| 12016 | 0.2680379 | 0.5184511 | PROZ         | 0.516997583 |
| 12017 | 0.1723734 | 0.3334125 | CLDN20       | 0.516997583 |
| 12018 | 0.244744  | 0.4733948 | DLG1-AS1     | 0.516997583 |
| 12019 | 0.3063197 | 0.5924973 | LPAL2        | 0.516997583 |
| 12020 | 0.0842018 | 0.1628669 | AGMO         | 0.516997583 |
| 12021 | 0.1146943 | 0.2218468 | SPINT2       | 0.516997583 |
| 12022 | 0.1897128 | 0.366951  | CHST4        | 0.516997583 |
| 12023 | 0.2592034 | 0.5013628 | REREP3       | 0.516997583 |
| 12024 | 0.0761694 | 0.1473303 | ZNF443       | 0.516997583 |
| 12025 | 0.2297679 | 0.4444274 | SRSF12       | 0.516997583 |
| 12026 | 0.319405  | 0.6178076 | GREB1        | 0.516997583 |
| 12027 | 0.0750989 | 0.1452597 | FRZB         | 0.516997583 |
| 12028 | 0.1250147 | 0.2418091 | BRE-AS1      | 0.516997583 |
| 12029 | 0.1500897 | 0.2903102 | SLC9A3       | 0.516997583 |
| 12030 | 0.1500897 | 0.2903102 | TGM1         | 0.516997583 |
| 12031 | 0.1887677 | 0.3651229 | LOC653712    | 0.516997583 |
| 12032 | 0.2362806 | 0.4570246 | LOC389765    | 0.516997583 |
| 12033 | 0.1797322 | 0.3476461 | HOXD3        | 0.516997583 |
| 12034 | 0.063614  | 0.1230451 | ZNF572       | 0.516997583 |
| 12035 | 0.0433894 | 0.0839258 | SLC28A3      | 0.516997583 |
| 12036 | 0.0643506 | 0.1244699 | TPTE2P1      | 0.516997583 |
| 12037 | 0.0933271 | 0.1805176 | TMPRSS5      | 0.516997583 |
| 12038 | 0.1410965 | 0.2729152 | LOC650368    | 0.516997583 |



|       |           |           |              |             |
|-------|-----------|-----------|--------------|-------------|
| 12039 | 0.1009688 | 0.1952983 | GCNT7        | 0.516997582 |
| 12040 | 0.0599711 | 0.1159988 | SNRK-AS1     | 0.516997582 |
| 12041 | 0.0967051 | 0.1870514 | CAPS2        | 0.516997582 |
| 12042 | 0.0822738 | 0.1591377 | LOC284080    | 0.516997582 |
| 12043 | 0.048465  | 0.0937432 | GPR83        | 0.516997582 |
| 12044 | 0.1336751 | 0.2585604 | CD160        | 0.516997582 |
| 12045 | 0.1086546 | 0.2101646 | TDRD5        | 0.516997582 |
| 12046 | 0.1534983 | 0.2969033 | PARK2        | 0.516997582 |
| 12047 | 0.1170126 | 0.2263311 | NIPSNAP3B    | 0.516997582 |
| 12048 | 0.0715658 | 0.1384257 | CRTAC1       | 0.516997582 |
| 12049 | 0.1480461 | 0.2863573 | PPIL6        | 0.516997582 |
| 12050 | 0.0836946 | 0.1618858 | ERVV-1       | 0.516997582 |
| 12051 | 0.1059479 | 0.2049292 | LOC100128714 | 0.516997582 |
| 12052 | 0.1179397 | 0.2281243 | SLFN12L      | 0.516997582 |
| 12053 | 0.111543  | 0.2157515 | NFAM1        | 0.516997582 |
| 12054 | 0.06458   | 0.1249134 | LRRC37A6P    | 0.516997582 |
| 12055 | 0.072512  | 0.140256  | LOC100506421 | 0.516997581 |
| 12056 | 0.0687333 | 0.1329471 | POU2AF1      | 0.51699758  |
| 12057 | 0.052139  | 0.1008496 | PIWIL2       | 0.51699758  |
| 12058 | 0.0335263 | 0.0648481 | TAF1L        | 0.51699758  |
| 12059 | 0.0528128 | 0.102153  | GPRASP2      | 0.516997579 |
| 12060 | 0.0220926 | 0.0427325 | DCX          | 0.516997577 |
| 12061 | 0.0317973 | 0.0615038 | ACSL6        | 0.516997576 |
| 12062 | 0.0388443 | 0.0751343 | WDR96        | 0.516997576 |
| 12063 | 0.0303878 | 0.0587774 | IPCEF1       | 0.516997575 |
| 12064 | 10.338356 | 20.024611 | BCLAF1       | 0.516282512 |
| 12065 | 9.0848678 | 17.602043 | CUL3         | 0.51612575  |
| 12066 | 83.086105 | 160.99249 | RBMX         | 0.516086843 |
| 12067 | 51.415169 | 99.690333 | UQCRC2       | 0.515748798 |
| 12068 | 5.6411311 | 10.950299 | MAP3K7       | 0.515157735 |
| 12069 | 82.77866  | 160.70239 | EIF3B        | 0.51510536  |
| 12070 | 59.859431 | 116.24226 | PPA1         | 0.514954115 |
| 12071 | 26.864876 | 52.180672 | AAAS         | 0.514843428 |
| 12072 | 11.018605 | 21.404944 | ACSL3        | 0.514769146 |
| 12073 | 4.0661391 | 7.9030885 | MTR          | 0.514500011 |
| 12074 | 2.3665297 | 4.6008025 | CENPE        | 0.514373231 |
| 12075 | 19.158954 | 37.271088 | CDCA7        | 0.514043312 |
| 12076 | 10.982075 | 21.367717 | SLC25A13     | 0.513956422 |
| 12077 | 21.88506  | 42.584547 | ASAP1        | 0.513920218 |
| 12078 | 3.4390741 | 6.6925729 | MTMR10       | 0.513864266 |
| 12079 | 20.286677 | 39.494205 | BCCIP        | 0.513662116 |
| 12080 | 18.059706 | 35.161711 | MKI67IP      | 0.513618515 |
| 12081 | 6.9775142 | 13.592167 | WAPAL        | 0.51334819  |

|       |           |           |          |             |
|-------|-----------|-----------|----------|-------------|
| 12082 | 11.423622 | 22.253913 | CHAMP1   | 0.513330935 |
| 12083 | 5.6242624 | 10.958302 | SCAF11   | 0.513242154 |
| 12084 | 1377.3995 | 2683.7687 | RPS27    | 0.5132333   |
| 12085 | 7.1024695 | 13.843053 | TLK1     | 0.51307102  |
| 12086 | 27.169301 | 52.964488 | TTLL12   | 0.512972019 |
| 12087 | 7.4083657 | 14.446285 | RALGAPB  | 0.512821513 |
| 12088 | 28.036349 | 54.696661 | XRN2     | 0.512578801 |
| 12089 | 93.387689 | 182.24338 | EIF4EBP1 | 0.512433923 |
| 12090 | 33.505223 | 65.385088 | TMPO     | 0.512429122 |
| 12091 | 3.2087908 | 6.2620035 | TMEM194B | 0.512422384 |
| 12092 | 10.712864 | 20.925454 | STK17A   | 0.511953706 |
| 12093 | 7.1812371 | 14.029175 | TMEM5    | 0.511878796 |
| 12094 | 1.1343321 | 2.216017  | TMOD2    | 0.511878796 |
| 12095 | 2.8082606 | 5.4869167 | TET3     | 0.511810317 |
| 12096 | 2.6562419 | 5.1936685 | TIAM1    | 0.51143847  |
| 12097 | 18.596516 | 36.379591 | MDC1     | 0.511179907 |
| 12098 | 8.9564954 | 17.550515 | TMEM209  | 0.510326648 |
| 12099 | 1.9745919 | 3.8709574 | USPL1    | 0.510104283 |
| 12100 | 6.2974667 | 12.350022 | TRMT2B   | 0.509915426 |
| 12101 | 22.940699 | 44.996149 | SAMD1    | 0.509836953 |
| 12102 | 199.90094 | 392.19639 | EEF1B2   | 0.509696024 |
| 12103 | 3.9367618 | 7.724068  | SH3BP2   | 0.509674672 |
| 12104 | 4.9935982 | 9.8019365 | CEP164   | 0.509450174 |
| 12105 | 60.476718 | 118.75515 | MRPS34   | 0.509255524 |
| 12106 | 82.22115  | 161.46876 | CD151    | 0.509207771 |
| 12107 | 29.5606   | 58.075796 | ELAC2    | 0.509000351 |
| 12108 | 1.8661729 | 3.6688099 | HIC2     | 0.508658913 |
| 12109 | 18.183878 | 35.764863 | MRPL46   | 0.508428564 |
| 12110 | 13.782331 | 27.109151 | ANKRD17  | 0.508401425 |
| 12111 | 6.5176626 | 12.82043  | CCNYL1   | 0.508380958 |
| 12112 | 48.259664 | 94.983663 | RNF167   | 0.508083833 |
| 12113 | 8.6115496 | 16.954291 | MB21D2   | 0.507927451 |
| 12114 | 15.898124 | 31.306605 | ISCA2    | 0.507820112 |
| 12115 | 22.053968 | 43.429681 | SLC38A2  | 0.507808665 |
| 12116 | 3.6001663 | 7.0958241 | PIAS2    | 0.507364089 |
| 12117 | 10.57306  | 20.845693 | TEX2     | 0.507205963 |
| 12118 | 4.9171291 | 9.6974213 | TAF8     | 0.507055323 |
| 12119 | 2.4494535 | 4.8326    | FAM86C1  | 0.506860377 |
| 12120 | 6.9122796 | 13.647046 | BPTF     | 0.506503723 |
| 12121 | 1.9506974 | 3.8517334 | C19orf26 | 0.506446613 |
| 12122 | 353.10048 | 697.29249 | CHCHD2   | 0.506387895 |
| 12123 | 12.975265 | 25.623576 | DENND5A  | 0.50637994  |
| 12124 | 19.042536 | 37.623075 | DNAJC11  | 0.5061398   |

|       |           |           |           |             |
|-------|-----------|-----------|-----------|-------------|
| 12125 | 4.052378  | 8.0111955 | MED17     | 0.505839363 |
| 12126 | 6.2927025 | 12.44012  | CIDEB     | 0.505839363 |
| 12127 | 136.51237 | 269.87377 | HNRNPA2B1 | 0.505837862 |
| 12128 | 6.498108  | 12.847007 | RBM26     | 0.50580716  |
| 12129 | 6.7298009 | 13.306352 | ZSWIM1    | 0.505758506 |
| 12130 | 50.573382 | 100.00368 | PLAUR     | 0.505715224 |
| 12131 | 6.9810263 | 13.809902 | ACADM     | 0.505508749 |
| 12132 | 1.9063572 | 3.7711655 | ARL10     | 0.505508749 |
| 12133 | 1.4508826 | 2.8701434 | IFT81     | 0.505508749 |
| 12134 | 64.391322 | 127.46291 | MRPL9     | 0.505176942 |
| 12135 | 22.586906 | 44.712562 | ASNS      | 0.505157945 |
| 12136 | 4.4675807 | 8.8447227 | NUDCD1    | 0.505112582 |
| 12137 | 14.144762 | 28.010851 | MPST      | 0.504974385 |
| 12138 | 0.7006708 | 1.3875372 | KIAA1551  | 0.504974385 |
| 12139 | 6.9191929 | 13.702067 | DIS3L     | 0.504974385 |
| 12140 | 50.430007 | 99.869542 | PRPF6     | 0.504958831 |
| 12141 | 7.0879213 | 14.063121 | ATP6V1C1  | 0.504007695 |
| 12142 | 0.7630739 | 1.5148133 | ITGA10    | 0.503741236 |
| 12143 | 9.6048284 | 19.066989 | NIF3L1    | 0.503741236 |
| 12144 | 2.9763898 | 5.9085688 | ARL13B    | 0.503741236 |
| 12145 | 0.8467901 | 1.6810021 | ZNF614    | 0.503741236 |
| 12146 | 1.9489371 | 3.868925  | TMCC1     | 0.503741236 |
| 12147 | 27.7866   | 55.17551  | GEMIN6    | 0.503603864 |
| 12148 | 2.4109151 | 4.7876552 | OBFC1     | 0.503569076 |
| 12149 | 61.85281  | 122.86404 | ODC1      | 0.503424855 |
| 12150 | 2.9685396 | 5.8970689 | UHRF1BP1L | 0.503392385 |
| 12151 | 17.072939 | 33.932144 | KATNB1    | 0.503149434 |
| 12152 | 1.2953008 | 2.5750243 | ARID4A    | 0.503024677 |
| 12153 | 1.9953144 | 3.9666332 | METTL21D  | 0.503024676 |
| 12154 | 29.771357 | 59.201008 | ATG3      | 0.502885988 |
| 12155 | 6.4513237 | 12.828959 | FASTKD5   | 0.502871967 |
| 12156 | 2.1941147 | 4.3640674 | NBPF9     | 0.502768293 |
| 12157 | 347.38485 | 690.96333 | MSN       | 0.502754392 |
| 12158 | 4.0435724 | 8.046873  | UBE2D1    | 0.502502325 |
| 12159 | 2.4298982 | 4.8382542 | ZNF101    | 0.502226225 |
| 12160 | 16.763689 | 33.387863 | CBX5      | 0.502089312 |
| 12161 | 3.6792534 | 7.3290126 | RECQL     | 0.502012147 |
| 12162 | 234.74264 | 467.66081 | RPSA      | 0.50195064  |
| 12163 | 1.4194217 | 2.8278747 | DENND4A   | 0.501939402 |
| 12164 | 17.819176 | 35.517064 | TM9SF3    | 0.501707452 |
| 12165 | 21.60083  | 43.065357 | ARIH2     | 0.501582519 |
| 12166 | 99.640251 | 198.66691 | HMGB1     | 0.501544268 |
| 12167 | 4.2401925 | 8.4650755 | MYO5A     | 0.500904274 |

|       |           |           |          |             |
|-------|-----------|-----------|----------|-------------|
| 12168 | 2.0968466 | 4.1866479 | PARPBP   | 0.50084141  |
| 12169 | 24.325945 | 48.575237 | PSMA5    | 0.500789011 |
| 12170 | 15.358137 | 30.670325 | PTK2     | 0.500749089 |
| 12171 | 7.7558055 | 15.488694 | TSPAN6   | 0.500739799 |
| 12172 | 24.984752 | 49.896407 | GSPT1    | 0.500732492 |
| 12173 | 5.4685551 | 10.922445 | CENPK    | 0.500671345 |
| 12174 | 27.011437 | 53.976763 | BRD7     | 0.500427149 |
| 12175 | 1.0672559 | 2.1331455 | ZNF749   | 0.500320243 |
| 12176 | 6.7814606 | 13.558444 | BBS5     | 0.500165105 |
| 12177 | 126.12357 | 252.21275 | EIF6     | 0.500068192 |
| 12178 | 3.8351168 | 7.6701253 | ZBTB24   | 0.500007053 |
| 12179 | 2.1550125 | 4.310424  | SLC4A3   | 0.499953708 |
| 12180 | 5.7826969 | 11.567551 | KLF7     | 0.499906755 |
| 12181 | 5.7410331 | 11.484458 | ZBED4    | 0.499895883 |
| 12182 | 19.591765 | 39.194104 | IGFBP3   | 0.499865111 |
| 12183 | 1.9795563 | 3.9609796 | SCLT1    | 0.499764332 |
| 12184 | 54.764482 | 109.61157 | CHD4     | 0.499623195 |
| 12185 | 18.708591 | 37.446674 | UBE2E2   | 0.499606228 |
| 12186 | 357.20631 | 715.06063 | RPL32    | 0.499546877 |
| 12187 | 1.6712857 | 3.3467706 | DMXL2    | 0.499372667 |
| 12188 | 5.840408  | 11.69549  | GTF2E1   | 0.499372666 |
| 12189 | 7.3952655 | 14.815122 | PURB     | 0.499170081 |
| 12190 | 0.9325853 | 1.8682716 | FAM179B  | 0.499170081 |
| 12191 | 4.5889658 | 9.195089  | SLC7A2   | 0.499067032 |
| 12192 | 12.553198 | 25.153806 | SHMT1    | 0.499057605 |
| 12193 | 3.7707054 | 7.5566344 | KIAA1598 | 0.498992693 |
| 12194 | 4.7262821 | 9.4750819 | STRN3    | 0.49881174  |
| 12195 | 1.8478329 | 3.7049237 | NBPF8    | 0.498750611 |
| 12196 | 10.837569 | 21.731781 | FAM57A   | 0.498696785 |
| 12197 | 6.0533691 | 12.151731 | ARHGEF28 | 0.498148714 |
| 12198 | 4.3339171 | 8.7022045 | TAF2     | 0.498025196 |
| 12199 | 0.8217147 | 1.6505283 | ZNF26    | 0.497849525 |
| 12200 | 1008.8798 | 2026.5714 | MTRNR2L8 | 0.497825906 |
| 12201 | 21.22804  | 42.642948 | UBE2R2   | 0.497808915 |
| 12202 | 10.64815  | 21.393004 | STK39    | 0.497739794 |
| 12203 | 25.512356 | 51.268161 | MYO10    | 0.497625726 |
| 12204 | 6.8296078 | 13.732569 | ADNP2    | 0.497329198 |
| 12205 | 7.6893736 | 15.464678 | MAP2K5   | 0.49722172  |
| 12206 | 2.4488191 | 4.9299473 | PLCL2    | 0.496723169 |
| 12207 | 4.2320223 | 8.5238759 | USP34    | 0.496490373 |
| 12208 | 23.842316 | 48.038417 | POLR3C   | 0.496317681 |
| 12209 | 5.631362  | 11.346285 | GNE      | 0.496317681 |
| 12210 | 10.401178 | 20.966793 | BCS1L    | 0.496078607 |

|       |           |           |              |             |
|-------|-----------|-----------|--------------|-------------|
| 12211 | 9.153528  | 18.457029 | CDK12        | 0.495937236 |
| 12212 | 4.3186845 | 8.7088576 | PPCDC        | 0.495895642 |
| 12213 | 1.9756736 | 3.9861539 | GAB2         | 0.495634048 |
| 12214 | 0.9712641 | 1.9603438 | ZNF536       | 0.495456018 |
| 12215 | 18.945409 | 38.238327 | CHD1L        | 0.495456018 |
| 12216 | 5.9908313 | 12.093996 | INTS8        | 0.495355825 |
| 12217 | 6.7263712 | 13.581084 | RSRC1        | 0.495274997 |
| 12218 | 51.728617 | 104.44423 | PPP1CC       | 0.495274996 |
| 12219 | 2.4822598 | 5.0146897 | NRIP1        | 0.494997687 |
| 12220 | 5.3842865 | 10.881848 | TTK          | 0.494795234 |
| 12221 | 491.50066 | 993.52378 | RPL5         | 0.49470447  |
| 12222 | 11.384352 | 23.021041 | GNAQ         | 0.494519428 |
| 12223 | 8.7045086 | 17.601955 | UBIAD1       | 0.494519428 |
| 12224 | 21.806908 | 44.128166 | AMPD2        | 0.494172084 |
| 12225 | 3.7539685 | 7.596868  | ARHGAP5      | 0.494146862 |
| 12226 | 3.1952223 | 6.4664698 | PRKCH        | 0.494121585 |
| 12227 | 7.4180022 | 15.020807 | LIN52        | 0.493848439 |
| 12228 | 6.6888506 | 13.544339 | ANKRD1       | 0.493848438 |
| 12229 | 18.658878 | 37.797842 | TCEB3        | 0.493649306 |
| 12230 | 4.3720175 | 8.859246  | ETV3         | 0.493497694 |
| 12231 | 1.425534  | 2.8886336 | GATA3        | 0.493497694 |
| 12232 | 15.233882 | 30.88043  | FNTA         | 0.493318306 |
| 12233 | 13.306451 | 26.975338 | AP3B1        | 0.493282099 |
| 12234 | 4.2550473 | 8.6323591 | EXOC5        | 0.492918245 |
| 12235 | 4.2142643 | 8.5509991 | STXBP3       | 0.492838819 |
| 12236 | 43.74593  | 88.785302 | NELFCD       | 0.492715897 |
| 12237 | 6.3874552 | 12.96586  | LDLRAD3      | 0.492636441 |
| 12238 | 7.9181032 | 16.07732  | E2F3         | 0.49250144  |
| 12239 | 1.1915352 | 2.419957  | ECE2         | 0.492378652 |
| 12240 | 3.5262183 | 7.1615986 | LOC100289092 | 0.492378652 |
| 12241 | 0.3514918 | 0.7138649 | ALS2CR8      | 0.492378651 |
| 12242 | 0.6928175 | 1.4070827 | FANCB        | 0.492378651 |
| 12243 | 0.3274662 | 0.6650699 | SLC4A5       | 0.492378651 |
| 12244 | 12.791629 | 25.98517  | STRIP1       | 0.492266493 |
| 12245 | 60.655662 | 123.24288 | CHCHD10      | 0.492163639 |
| 12246 | 11.154174 | 22.667305 | SLC25A33     | 0.492082038 |
| 12247 | 36.95974  | 75.149785 | CD68         | 0.491814321 |
| 12248 | 5.9630084 | 12.125402 | NLE1         | 0.49177819  |
| 12249 | 1.6431717 | 3.3426913 | PRKAR2B      | 0.491571474 |
| 12250 | 9.4994346 | 19.336694 | ATP6V1A      | 0.491264673 |
| 12251 | 16.082638 | 32.739289 | EVL          | 0.491233585 |
| 12252 | 19.012625 | 38.715983 | CTCF         | 0.4910795   |
| 12253 | 57.88875  | 117.89133 | CDC123       | 0.491034824 |

|       |           |           |              |             |
|-------|-----------|-----------|--------------|-------------|
| 12254 | 14.57014  | 29.681275 | APBB1        | 0.490886595 |
| 12255 | 14.575701 | 29.698427 | MYO19        | 0.490790333 |
| 12256 | 42.853982 | 87.318476 | NOB1         | 0.490777941 |
| 12257 | 2.6791488 | 5.4597443 | SIX2         | 0.490709572 |
| 12258 | 40.473132 | 82.504442 | THAP4        | 0.490557011 |
| 12259 | 24.151436 | 49.243172 | CSNK2A2      | 0.490452476 |
| 12260 | 71.024289 | 144.84116 | PXN          | 0.490359828 |
| 12261 | 1.8245864 | 3.7210014 | ARHGEF26     | 0.490348224 |
| 12262 | 7.2983061 | 14.886107 | DCP1A        | 0.490276361 |
| 12263 | 3.1829971 | 6.492516  | PI4K2B       | 0.49025633  |
| 12264 | 4.9182461 | 10.031989 | ATF7IP       | 0.49025633  |
| 12265 | 19.433076 | 39.643943 | PYCR1        | 0.490190302 |
| 12266 | 30.310091 | 61.86527  | PHLDA1       | 0.489937105 |
| 12267 | 1.5261151 | 3.115874  | FAM86B1      | 0.489787185 |
| 12268 | 0.6109432 | 1.2473645 | ZNF616       | 0.489787185 |
| 12269 | 3.8616337 | 7.8843094 | C3orf17      | 0.489787185 |
| 12270 | 3.6173491 | 7.3855527 | TLCD1        | 0.489787185 |
| 12271 | 2.0730539 | 4.2325605 | RHOJ         | 0.489787185 |
| 12272 | 3.16623   | 6.4645015 | USP6NL       | 0.489787185 |
| 12273 | 8.7222511 | 17.808247 | SHB          | 0.489787185 |
| 12274 | 0.6578729 | 1.343181  | KCNJ14       | 0.489787185 |
| 12275 | 29.993366 | 61.245897 | UBA2         | 0.489720411 |
| 12276 | 9.5778919 | 19.582841 | SLC25A32     | 0.489096127 |
| 12277 | 16.347365 | 33.439654 | MRPL44       | 0.488861661 |
| 12278 | 1.5267363 | 3.1234521 | FUT10        | 0.488797716 |
| 12279 | 2.8002    | 5.7287502 | PLK4         | 0.488797716 |
| 12280 | 4.1225577 | 8.4351205 | DOCK10       | 0.488737266 |
| 12281 | 2.8418114 | 5.8154122 | VDR          | 0.488668949 |
| 12282 | 7.6641444 | 15.691714 | GTDC2        | 0.488419828 |
| 12283 | 1.404198  | 2.8758314 | XRN1         | 0.488275496 |
| 12284 | 9.8089912 | 20.098509 | NFS1         | 0.48804572  |
| 12285 | 8.7659279 | 17.964705 | MSL3P1       | 0.487952776 |
| 12286 | 0.7282622 | 1.4931557 | LMLN         | 0.48773357  |
| 12287 | 2.0754855 | 4.2553674 | SLC9A7       | 0.48773357  |
| 12288 | 12.111675 | 24.840174 | SYNJ2        | 0.487584155 |
| 12289 | 9.4162634 | 19.314168 | PUS1         | 0.487531401 |
| 12290 | 9.4727046 | 19.430749 | CPOX         | 0.48751103  |
| 12291 | 29.516016 | 60.548449 | SF3B1        | 0.48747766  |
| 12292 | 1.9830402 | 4.0681515 | ZNF518B      | 0.487454865 |
| 12293 | 50.584242 | 103.88875 | SPCS1        | 0.486907778 |
| 12294 | 22.06447  | 45.322197 | USP7         | 0.486835852 |
| 12295 | 0.7779729 | 1.5988397 | AMDHD1       | 0.486585962 |
| 12296 | 1.2160438 | 2.4991345 | LOC100288069 | 0.486585962 |

|       |           |           |              |             |
|-------|-----------|-----------|--------------|-------------|
| 12297 | 0.9726931 | 1.999016  | FAM86EP      | 0.486585961 |
| 12298 | 49.324387 | 101.38746 | AURKB        | 0.486493945 |
| 12299 | 6.5446078 | 13.454197 | NOM1         | 0.486436151 |
| 12300 | 11.926817 | 24.524869 | PHRF1        | 0.486315235 |
| 12301 | 6.4965614 | 13.366712 | SLC30A9      | 0.486025379 |
| 12302 | 2.1541184 | 4.4325456 | GABBR1       | 0.485977729 |
| 12303 | 4.0642226 | 8.3629812 | HOOK3        | 0.485977729 |
| 12304 | 6.5958091 | 13.572246 | GSTZ1        | 0.485977729 |
| 12305 | 13.735595 | 28.265407 | SPCS2        | 0.485950732 |
| 12306 | 22.902237 | 47.132804 | SRPX         | 0.485908643 |
| 12307 | 64.061581 | 131.88016 | COX5A        | 0.485756015 |
| 12308 | 2080.5753 | 4284.059  | MTRNR2L2     | 0.485655149 |
| 12309 | 7.9897572 | 16.455806 | VPS45        | 0.485528166 |
| 12310 | 9.3313209 | 19.22174  | HAUS2        | 0.485456618 |
| 12311 | 15.248744 | 31.431335 | POLR1C       | 0.485144653 |
| 12312 | 1.4954202 | 3.0835238 | PAPOLG       | 0.484971185 |
| 12313 | 2.5686052 | 5.2995325 | GSC          | 0.484685235 |
| 12314 | 3.1768216 | 6.5544015 | C11orf1      | 0.484685235 |
| 12315 | 0.6954377 | 1.4348234 | PPP1R3E      | 0.484685235 |
| 12316 | 29.870773 | 61.660284 | SRP72        | 0.484441061 |
| 12317 | 9.97568   | 20.59258  | RFC5         | 0.484430807 |
| 12318 | 12.437082 | 25.673597 | PNO1         | 0.484430807 |
| 12319 | 1.2182995 | 2.5150996 | GPR180       | 0.484394133 |
| 12320 | 47.686456 | 98.448905 | HNRNPA3      | 0.484377716 |
| 12321 | 5.5208459 | 11.4002   | PDE4DIP      | 0.484276218 |
| 12322 | 3.6718007 | 7.5820381 | FAM118B      | 0.484276218 |
| 12323 | 5.024753  | 10.378026 | VPS41        | 0.484172341 |
| 12324 | 10.641904 | 21.980455 | STC1         | 0.484153032 |
| 12325 | 0.9406625 | 1.9435266 | SCAPER       | 0.483997739 |
| 12326 | 2.3966487 | 4.9517767 | PFN1P2       | 0.483997738 |
| 12327 | 1.6732807 | 3.4572076 | LOC100131067 | 0.483997738 |
| 12328 | 18.017873 | 37.230366 | SRPRB        | 0.483956385 |
| 12329 | 3.38766   | 7.0044655 | PDSS2        | 0.483642901 |
| 12330 | 3.12191   | 6.4565916 | GALNT7       | 0.483522921 |
| 12331 | 2.209182  | 4.5698422 | HEATR5B      | 0.483426313 |
| 12332 | 3.2505194 | 6.7300687 | ST7L         | 0.482984585 |
| 12333 | 118.58366 | 245.54545 | CLTA         | 0.482939772 |
| 12334 | 17.659963 | 36.582117 | RNF4         | 0.482748533 |
| 12335 | 6.4165029 | 13.293394 | RBBP6        | 0.482683585 |
| 12336 | 10.048981 | 20.821526 | GSK3B        | 0.48262461  |
| 12337 | 0.3695963 | 0.7659533 | SLC25A21     | 0.482531079 |
| 12338 | 0.5966448 | 1.2364899 | ZNRD1-AS1    | 0.482531079 |
| 12339 | 0.6134552 | 1.2713279 | SLC27A5      | 0.482531079 |

|       |           |           |            |             |
|-------|-----------|-----------|------------|-------------|
| 12340 | 0.3768526 | 0.7809914 | SWT1       | 0.482531078 |
| 12341 | 0.9200861 | 1.9067914 | IFT88      | 0.482531078 |
| 12342 | 30.893176 | 64.094719 | XPO1       | 0.481992539 |
| 12343 | 2.1144221 | 4.3890647 | TBCEL      | 0.481747749 |
| 12344 | 3.7719367 | 7.8323092 | C11orf57   | 0.481586791 |
| 12345 | 10.216684 | 21.223523 | USO1       | 0.481384924 |
| 12346 | 993.15387 | 2064.2908 | RPLP1      | 0.481111406 |
| 12347 | 31.65562  | 65.821955 | SIVA1      | 0.480927985 |
| 12348 | 0.978861  | 2.0353587 | ARHGEF4    | 0.480927985 |
| 12349 | 3.7872537 | 7.876508  | DNAJC21    | 0.480829029 |
| 12350 | 1.506805  | 3.1371677 | ZBTB10     | 0.480307433 |
| 12351 | 4.0302885 | 8.39106   | PAXIP1     | 0.480307433 |
| 12352 | 4.9578224 | 10.333667 | DHODH      | 0.479773758 |
| 12353 | 22.07858  | 46.029575 | CKAP5      | 0.479660738 |
| 12354 | 6.692441  | 13.960839 | ZDHHC20    | 0.479372423 |
| 12355 | 4.6177977 | 9.6349299 | POMT2      | 0.47927673  |
| 12356 | 18.957213 | 39.55612  | FTSJ2      | 0.479248554 |
| 12357 | 3.4276234 | 7.1532737 | ZNF644     | 0.479168493 |
| 12358 | 1.4593085 | 3.0455019 | ZNF236     | 0.479168493 |
| 12359 | 3.9635541 | 8.2717335 | PLEKHA1    | 0.479168493 |
| 12360 | 1.9149896 | 3.998032  | SREK1IP1   | 0.478983056 |
| 12361 | 9.7620947 | 20.387393 | MRPS9      | 0.478829977 |
| 12362 | 2.9602202 | 6.1838544 | HERC5      | 0.478701467 |
| 12363 | 1.4671888 | 3.0649349 | CYB5RL     | 0.478701467 |
| 12364 | 37.306083 | 77.935389 | CIRH1A     | 0.478679633 |
| 12365 | 19.391908 | 40.53888  | SLC35C2    | 0.47835332  |
| 12366 | 2.2138333 | 4.6292931 | R3HCC1L    | 0.478222765 |
| 12367 | 5.5384292 | 11.584641 | COQ6       | 0.478083788 |
| 12368 | 8.6612176 | 18.120502 | NUP54      | 0.477978899 |
| 12369 | 7.6582499 | 16.023139 | SMCR8      | 0.477949428 |
| 12370 | 0.8992904 | 1.8820257 | INO80D     | 0.4778311   |
| 12371 | 23.806174 | 49.863701 | ARFGAP1    | 0.47742493  |
| 12372 | 0.3784495 | 0.7930151 | CERKL      | 0.47722854  |
| 12373 | 0.6773548 | 1.419351  | CLDN4      | 0.47722854  |
| 12374 | 1.2222845 | 2.5612141 | DLGAP1-AS1 | 0.477228539 |
| 12375 | 0.6647512 | 1.392941  | FAM72A     | 0.477228539 |
| 12376 | 0.2709419 | 0.5677404 | NOX4       | 0.477228539 |
| 12377 | 4.0131953 | 8.4093783 | MAP4K3     | 0.477228539 |
| 12378 | 4.6311    | 9.7041556 | SCARNA12   | 0.477228539 |
| 12379 | 1.9411796 | 4.0676101 | SUPT3H     | 0.477228539 |
| 12380 | 1.7685955 | 3.7059717 | LOC728752  | 0.477228539 |
| 12381 | 1.1914216 | 2.4965431 | PDIA3P     | 0.477228539 |
| 12382 | 0.379368  | 0.7949399 | LOC727849  | 0.477228539 |



|       |           |           |              |             |
|-------|-----------|-----------|--------------|-------------|
| 12383 | 18.787448 | 39.385327 | MRPS35       | 0.477016438 |
| 12384 | 9.8936337 | 20.744195 | CWF19L1      | 0.476935041 |
| 12385 | 5.7449452 | 12.048547 | CHD1         | 0.476816425 |
| 12386 | 3.6511403 | 7.6583596 | DNMT3A       | 0.476752263 |
| 12387 | 4.6097118 | 9.6756684 | GLI3         | 0.47642309  |
| 12388 | 24.650719 | 51.762362 | TOMM20       | 0.476228632 |
| 12389 | 4.8561801 | 10.19816  | ZNF710       | 0.476181986 |
| 12390 | 3.5434559 | 7.44292   | IMPACT       | 0.476084106 |
| 12391 | 1.772192  | 3.7259277 | PAPD5        | 0.475637778 |
| 12392 | 17.30393  | 36.380478 | TIMM9        | 0.475637778 |
| 12393 | 1.7838439 | 3.7504251 | ZNF277       | 0.475637777 |
| 12394 | 4.6507859 | 9.7811035 | ARID3A       | 0.475486829 |
| 12395 | 3.1890042 | 6.707114  | APC          | 0.475465922 |
| 12396 | 1.3377164 | 2.8138751 | AKAP9        | 0.475400077 |
| 12397 | 3.4631393 | 7.2896093 | GPR137B      | 0.475078861 |
| 12398 | 13.718174 | 28.886643 | PSPH         | 0.474896804 |
| 12399 | 6.7788565 | 14.280363 | ZBTB2        | 0.474697782 |
| 12400 | 6.9828819 | 14.717102 | EPB41L1      | 0.474473973 |
| 12401 | 4.4324198 | 9.3427924 | MAP3K4       | 0.474421313 |
| 12402 | 6.5334248 | 13.771356 | MPHOSPH10    | 0.474421312 |
| 12403 | 6.8575025 | 14.457858 | GPSM2        | 0.47430971  |
| 12404 | 115.76647 | 244.0851  | RPL22        | 0.47428732  |
| 12405 | 11.978642 | 25.263269 | THOC6        | 0.474152481 |
| 12406 | 1.3969497 | 2.9476833 | MORN1        | 0.473914452 |
| 12407 | 0.955961  | 2.0171594 | LOC100134229 | 0.473914452 |
| 12408 | 10.65301  | 22.478761 | TTC7B        | 0.473914452 |
| 12409 | 1.6356721 | 3.451408  | BORA         | 0.473914452 |
| 12410 | 18.607098 | 39.266762 | RALBP1       | 0.473863826 |
| 12411 | 8.7263703 | 18.433577 | RNMTL1       | 0.473395378 |
| 12412 | 8.2250376 | 17.389167 | APTX         | 0.47299779  |
| 12413 | 5.1928792 | 10.978654 | LOX          | 0.47299779  |
| 12414 | 4.8687011 | 10.294359 | GTF3C3       | 0.472948463 |
| 12415 | 4.4164912 | 9.3398833 | TYW3         | 0.472863644 |
| 12416 | 6.94665   | 14.693176 | NUP133       | 0.472780686 |
| 12417 | 12.36734  | 26.161731 | SSFA2        | 0.472726383 |
| 12418 | 6.3560656 | 13.446768 | TBC1D5       | 0.472683506 |
| 12419 | 3.118197  | 6.5967967 | GALK2        | 0.472683506 |
| 12420 | 58.184022 | 123.09298 | UBE2C        | 0.472683506 |
| 12421 | 2.4145948 | 5.109367  | CHD9         | 0.472581984 |
| 12422 | 25.93457  | 54.894564 | CLN6         | 0.472443321 |
| 12423 | 9.5085085 | 20.133019 | MMGT1        | 0.47228428  |
| 12424 | 9.4478418 | 20.005704 | FAM49B       | 0.472257409 |
| 12425 | 9.9352782 | 21.045625 | TTL          | 0.472082822 |

|       |           |           |              |             |
|-------|-----------|-----------|--------------|-------------|
| 12426 | 9.1933361 | 19.480461 | RIOK3        | 0.471926    |
| 12427 | 14.571929 | 30.882875 | SQLE         | 0.471844957 |
| 12428 | 8.3706771 | 17.742922 | METTL21A     | 0.471775573 |
| 12429 | 25.630743 | 54.363864 | FAF1         | 0.471466547 |
| 12430 | 60.967565 | 129.33842 | DDX24        | 0.47138015  |
| 12431 | 1.4292886 | 3.0321358 | RUFY2        | 0.47138015  |
| 12432 | 2.0605279 | 4.3730513 | EPC2         | 0.471187672 |
| 12433 | 5.9448352 | 12.616704 | PUSL1        | 0.471187672 |
| 12434 | 5.550592  | 11.781939 | GOLGA5       | 0.471110225 |
| 12435 | 27.815128 | 59.043449 | UBL7         | 0.47109593  |
| 12436 | 27.650057 | 58.716993 | CSNK2A1      | 0.470903824 |
| 12437 | 11.374571 | 24.159364 | RBM12        | 0.470814177 |
| 12438 | 20.723433 | 44.028224 | CHRAC1       | 0.470685186 |
| 12439 | 14.515388 | 30.861666 | CECR5        | 0.470337152 |
| 12440 | 20.670716 | 43.957071 | RRS1         | 0.470247803 |
| 12441 | 11.810976 | 25.117734 | POLR3A       | 0.470224582 |
| 12442 | 60.840541 | 129.39532 | EBNA1BP2     | 0.470191219 |
| 12443 | 0.189282  | 0.4027296 | ARHGEF5      | 0.469997805 |
| 12444 | 0.4367131 | 0.9291812 | KIAA1984-AS1 | 0.469997804 |
| 12445 | 6.2327202 | 13.261169 | RPUSD2       | 0.469997804 |
| 12446 | 0.7281604 | 1.5492846 | ADRB1        | 0.469997804 |
| 12447 | 1.7761321 | 3.7790221 | WDR67        | 0.469997804 |
| 12448 | 3.6950266 | 7.8617955 | MLF1         | 0.469997804 |
| 12449 | 13.873828 | 29.518921 | EXOSC8       | 0.469997804 |
| 12450 | 97.838081 | 208.2156  | RPS23        | 0.469888343 |
| 12451 | 11.392448 | 24.256122 | NUS1         | 0.469673107 |
| 12452 | 6.7975064 | 14.47949  | HDAC8        | 0.469457576 |
| 12453 | 5.2579485 | 11.20092  | USP8         | 0.469421119 |
| 12454 | 18.889564 | 40.25016  | VTI1B        | 0.46930408  |
| 12455 | 1.4314046 | 3.0518485 | GPAM         | 0.469028736 |
| 12456 | 1.5188817 | 3.2403191 | UVSSA        | 0.468744476 |
| 12457 | 2.7601664 | 5.888819  | MYCBP2       | 0.468713072 |
| 12458 | 2.4393887 | 5.2064832 | ADAMTS12     | 0.468529061 |
| 12459 | 8.4185774 | 17.973398 | RNF113A      | 0.468390974 |
| 12460 | 106.47164 | 227.43909 | CDC20        | 0.468132538 |
| 12461 | 4.1597732 | 8.890356  | GPR56        | 0.467897255 |
| 12462 | 11.717456 | 25.044713 | RPRD1B       | 0.46786145  |
| 12463 | 32.213172 | 68.878076 | S100A13      | 0.467683969 |
| 12464 | 4.477452  | 9.57367   | ZNF638       | 0.467683968 |
| 12465 | 6.8756341 | 14.704002 | KIAA1429     | 0.467602911 |
| 12466 | 21.408926 | 45.793611 | CNOT1        | 0.467509017 |
| 12467 | 324.232   | 693.68843 | RPL9         | 0.467402923 |
| 12468 | 0.01      | 0.021398  | ZNF831       | 0.467333199 |

|       |           |           |              |             |
|-------|-----------|-----------|--------------|-------------|
| 12469 | 5.1934128 | 11.113985 | SMO          | 0.467286278 |
| 12470 | 0.7570298 | 1.6211685 | KCNG3        | 0.46696556  |
| 12471 | 0.6786678 | 1.4533574 | DGKH         | 0.46696556  |
| 12472 | 28.82851  | 61.7869   | ETF1         | 0.466579638 |
| 12473 | 4.1107963 | 8.8155576 | CXCL3        | 0.466311547 |
| 12474 | 2.090357  | 4.4827476 | TRMT10B      | 0.466311547 |
| 12475 | 2.401397  | 5.1497696 | OXNAD1       | 0.466311547 |
| 12476 | 6.4654329 | 13.876222 | PRIM2        | 0.465936094 |
| 12477 | 6.3410518 | 13.616735 | ZHX3         | 0.465680787 |
| 12478 | 16.153028 | 34.688125 | PWP2         | 0.465664491 |
| 12479 | 822.58965 | 1767.6737 | RPS18        | 0.465351512 |
| 12480 | 0.3981311 | 0.8556478 | SYDE2        | 0.465297827 |
| 12481 | 0.3559005 | 0.7648875 | LOC399744    | 0.465297827 |
| 12482 | 0.5039214 | 1.0830083 | TRMT10A      | 0.465297826 |
| 12483 | 0.9713079 | 2.0874971 | C16orf46     | 0.465297826 |
| 12484 | 1.1177566 | 2.4022389 | ZNF587B      | 0.465297826 |
| 12485 | 0.867528  | 1.8644574 | LOC100132077 | 0.465297826 |
| 12486 | 15.304338 | 32.908984 | GAR1         | 0.465050458 |
| 12487 | 25.353567 | 54.53777  | PIGU         | 0.464880892 |
| 12488 | 268.03794 | 576.64718 | MTRNR2L1     | 0.464821384 |
| 12489 | 2.9134799 | 6.2707458 | KIAA1147     | 0.464614569 |
| 12490 | 1.8934304 | 4.0758504 | ETV1         | 0.464548554 |
| 12491 | 5.1582171 | 11.106069 | AGPAT5       | 0.464450289 |
| 12492 | 3.9773761 | 8.5641505 | SOS1         | 0.464421559 |
| 12493 | 6.4108732 | 13.805258 | BBX          | 0.46437909  |
| 12494 | 0.9529805 | 2.0527634 | GLCCI1       | 0.464242729 |
| 12495 | 379.89871 | 818.41492 | PABPC1       | 0.464188389 |
| 12496 | 6.9793017 | 15.039117 | PANK3        | 0.464076572 |
| 12497 | 2.5706063 | 5.5391856 | ZNF276       | 0.464076572 |
| 12498 | 16.938876 | 36.514689 | CDH11        | 0.463892092 |
| 12499 | 9.3425169 | 20.14819  | PPFIBP1      | 0.463690141 |
| 12500 | 13.013633 | 28.065845 | SPCS3        | 0.463682208 |
| 12501 | 756.96806 | 1632.6196 | RPL29        | 0.46365244  |
| 12502 | 0.6025116 | 1.2998749 | ERCC6        | 0.463515076 |
| 12503 | 2.6262781 | 5.6660037 | MAGI3        | 0.463515075 |
| 12504 | 29.991072 | 64.703552 | CTNBL1       | 0.463515075 |
| 12505 | 0.3508863 | 0.7570117 | ZNF850       | 0.463515075 |
| 12506 | 5.8519346 | 12.636382 | ANGEL1       | 0.463102083 |
| 12507 | 17.179312 | 37.11089  | MTFP1        | 0.462918339 |
| 12508 | 11.460884 | 24.763797 | SLC19A1      | 0.462808036 |
| 12509 | 72.347599 | 156.34664 | GAS5         | 0.462738432 |
| 12510 | 12.632877 | 27.302461 | GLS          | 0.462701034 |
| 12511 | 2.9172643 | 6.3049931 | HERC1        | 0.462691115 |

|       |           |           |              |             |
|-------|-----------|-----------|--------------|-------------|
| 12512 | 11.912677 | 25.747376 | AKAP1        | 0.462675374 |
| 12513 | 1.8356433 | 3.9682996 | LENG9        | 0.462576786 |
| 12514 | 4.4354197 | 9.5885048 | UGDH         | 0.462576786 |
| 12515 | 4.9150826 | 10.630525 | SPATC1L      | 0.462355563 |
| 12516 | 1.9731242 | 4.2708516 | AGTPBP1      | 0.461997841 |
| 12517 | 8.163907  | 17.677041 | UBR5         | 0.461836754 |
| 12518 | 31.767105 | 68.788263 | SMARCD1      | 0.461809969 |
| 12519 | 2.0999731 | 4.5475199 | C10orf12     | 0.46178425  |
| 12520 | 30.14584  | 65.281221 | RRP9         | 0.46178425  |
| 12521 | 5.0694749 | 10.978016 | CSGALNACT2   | 0.46178425  |
| 12522 | 20.468529 | 44.354582 | ARPP19       | 0.461474956 |
| 12523 | 15.471679 | 33.548187 | AP2A2        | 0.461177794 |
| 12524 | 8.33598   | 18.078231 | NUTM2A-AS1   | 0.461105953 |
| 12525 | 24.272581 | 52.644131 | PIAS3        | 0.461069086 |
| 12526 | 3.8157655 | 8.2795477 | GDF11        | 0.460866418 |
| 12527 | 3.1948037 | 6.9321685 | UBXN2B       | 0.460866418 |
| 12528 | 25.067162 | 54.411006 | HIF1A        | 0.460700207 |
| 12529 | 2.1256402 | 4.614959  | LNX2         | 0.460597848 |
| 12530 | 21.88162  | 47.519926 | CBFB         | 0.460472515 |
| 12531 | 6.7718551 | 14.710541 | VPRBP        | 0.460340315 |
| 12532 | 6.6343786 | 14.412396 | ZNF142       | 0.460324471 |
| 12533 | 3.6943088 | 8.0266748 | QRSL1        | 0.460253947 |
| 12534 | 17.694297 | 38.450428 | LPCAT4       | 0.460184663 |
| 12535 | 37.36553  | 81.215214 | ALG3         | 0.460080419 |
| 12536 | 15.173074 | 33.005277 | UBAP2        | 0.459716602 |
| 12537 | 0.5678461 | 1.2356476 | CHRM4        | 0.459553409 |
| 12538 | 0.8289009 | 1.8037096 | LOC145783    | 0.459553408 |
| 12539 | 0.4183679 | 0.9103792 | TMPPE        | 0.459553408 |
| 12540 | 0.3457478 | 0.7523561 | ZNF165       | 0.459553408 |
| 12541 | 0.5670735 | 1.2339664 | TEX9         | 0.459553408 |
| 12542 | 0.8683313 | 1.8895111 | LIPT2        | 0.459553408 |
| 12543 | 1.2604808 | 2.7428386 | LOC100505812 | 0.459553408 |
| 12544 | 1.2231812 | 2.6616737 | IQCD         | 0.459553408 |
| 12545 | 1.3350384 | 2.9050779 | PAX9         | 0.459553408 |
| 12546 | 0.4987125 | 1.0852113 | IQCA1        | 0.459553408 |
| 12547 | 0.7449491 | 1.6210283 | INPP5J       | 0.459553408 |
| 12548 | 1.4931387 | 3.2491081 | SASS6        | 0.459553408 |
| 12549 | 1.4701905 | 3.1991722 | FAM175A      | 0.459553408 |
| 12550 | 0.6575845 | 1.4309208 | PIK3C2B      | 0.459553408 |
| 12551 | 0.4104372 | 0.8931219 | DDX11-AS1    | 0.459553408 |
| 12552 | 0.7318683 | 1.5925642 | LOC284751    | 0.459553408 |
| 12553 | 0.5174413 | 1.1259656 | NBPF7        | 0.459553408 |
| 12554 | 0.3782205 | 0.8230175 | LOC151009    | 0.459553407 |

|       |           |           |         |             |
|-------|-----------|-----------|---------|-------------|
| 12555 | 7.1734227 | 15.620741 | EAF1    | 0.459224215 |
| 12556 | 5.838232  | 12.716417 | GRPEL2  | 0.459109824 |
| 12557 | 3.9854775 | 8.6815069 | LRCH1   | 0.459076693 |
| 12558 | 6.1149263 | 13.32323  | RNF13   | 0.458967243 |
| 12559 | 10.623986 | 23.155294 | RFK     | 0.458814576 |
| 12560 | 34.941885 | 76.19235  | MAP4K4  | 0.458600966 |
| 12561 | 1.5630871 | 3.4101066 | ZNF280B | 0.458368992 |
| 12562 | 7.2413776 | 15.808172 | SEL1L   | 0.458078116 |
| 12563 | 2.6156474 | 5.713033  | MOB1B   | 0.457838657 |
| 12564 | 0.01      | 0.0218456 | COL6A5  | 0.457757309 |
| 12565 | 2.7745496 | 6.0623366 | SERTAD4 | 0.457669993 |
| 12566 | 4.5695863 | 9.9860308 | KLHL18  | 0.457597862 |
| 12567 | 8.1977435 | 17.916228 | EMP2    | 0.457559684 |
| 12568 | 5.4535038 | 11.920316 | WDR36   | 0.457496584 |
| 12569 | 33.460083 | 73.145811 | NASP    | 0.457443605 |
| 12570 | 1.4752812 | 3.2257581 | SPIRE2  | 0.457344017 |
| 12571 | 4.7517801 | 10.394704 | THOC3   | 0.457134706 |
| 12572 | 6.5307818 | 14.287377 | BNC1    | 0.457101523 |
| 12573 | 16.220939 | 35.488491 | B4GALT1 | 0.457076031 |
| 12574 | 2.7776854 | 6.0796615 | PMS2    | 0.456881586 |
| 12575 | 8.913517  | 19.520718 | CNOT10  | 0.456618304 |
| 12576 | 1.7383668 | 3.8074544 | SPATA5  | 0.456569295 |
| 12577 | 1.6045251 | 3.514308  | METTL15 | 0.456569295 |
| 12578 | 105.26446 | 230.58556 | SET     | 0.456509329 |
| 12579 | 6.4562982 | 14.147868 | CAMSAP1 | 0.456344236 |
| 12580 | 6.9569566 | 15.250653 | WDYHV1  | 0.456174339 |
| 12581 | 20.814947 | 45.641459 | SAFB2   | 0.456053498 |
| 12582 | 19.435226 | 42.617227 | UNG     | 0.456041537 |
| 12583 | 6.6650054 | 14.617421 | OSBPL2  | 0.455963147 |
| 12584 | 27.269562 | 59.843338 | LAS1L   | 0.455682507 |
| 12585 | 0.9514288 | 2.0880286 | NEK1    | 0.455658888 |
| 12586 | 4.6430051 | 10.189651 | B9D1    | 0.455658888 |
| 12587 | 12.27204  | 26.949266 | ZFP36L2 | 0.45537565  |
| 12588 | 0.4892007 | 1.0752659 | TTC30A  | 0.454957874 |
| 12589 | 1.1871541 | 2.6093714 | C3orf33 | 0.454957874 |
| 12590 | 4.1592337 | 9.1458687 | ATG14   | 0.454766394 |
| 12591 | 29.451597 | 64.790018 | DNAJC5  | 0.454569974 |
| 12592 | 36.572222 | 80.458822 | SRSF6   | 0.454545821 |
| 12593 | 1.2420028 | 2.7336946 | PEAR1   | 0.45433121  |
| 12594 | 2.2267197 | 4.9037774 | MYSM1   | 0.454082534 |
| 12595 | 2.3859879 | 5.2551336 | PHIP    | 0.45402993  |
| 12596 | 1.0449    | 2.3017999 | LLGL2   | 0.453949098 |
| 12597 | 3.9183115 | 8.6365059 | MRPS25  | 0.453691758 |

|       |           |           |          |             |
|-------|-----------|-----------|----------|-------------|
| 12598 | 10.279006 | 22.665612 | REPS1    | 0.453506653 |
| 12599 | 9.8736339 | 21.771751 | FANCI    | 0.453506653 |
| 12600 | 1.8471858 | 4.0731173 | CEP152   | 0.453506653 |
| 12601 | 7.730598  | 17.058909 | E2F7     | 0.453170722 |
| 12602 | 14.085928 | 31.087969 | TAF13    | 0.453099006 |
| 12603 | 5.1351006 | 11.339653 | MOAP1    | 0.452844599 |
| 12604 | 3.3696009 | 7.4487243 | APPL1    | 0.452372886 |
| 12605 | 1.777936  | 3.9302444 | HOXC5    | 0.452372886 |
| 12606 | 16.632824 | 36.784848 | TSN      | 0.45216509  |
| 12607 | 11.355775 | 25.117214 | WRAP53   | 0.452111248 |
| 12608 | 19.197868 | 42.504876 | RABGGTB  | 0.451662725 |
| 12609 | 13.737607 | 30.424823 | CCNH     | 0.451526274 |
| 12610 | 17.378694 | 38.516788 | TRUB2    | 0.451197892 |
| 12611 | 0.01      | 0.0221774 | ZNF208   | 0.450910298 |
| 12612 | 2.4636937 | 5.4661794 | COMMD8   | 0.450715843 |
| 12613 | 0.8565743 | 1.9004753 | PYROXD1  | 0.450715843 |
| 12614 | 2.3665942 | 5.2507455 | NAT6     | 0.450715843 |
| 12615 | 6.2407312 | 13.852086 | HACL1    | 0.450526466 |
| 12616 | 4.7661963 | 10.583026 | CUL2     | 0.45036234  |
| 12617 | 5.5159061 | 12.248764 | LRP8     | 0.450323477 |
| 12618 | 10.080627 | 22.394205 | UTP3     | 0.450144448 |
| 12619 | 6.4500951 | 14.332621 | TAF9B    | 0.450028985 |
| 12620 | 12.220557 | 27.158038 | MTX2     | 0.449979379 |
| 12621 | 0.4834134 | 1.0752959 | ZNF845   | 0.449563117 |
| 12622 | 2.519184  | 5.6036271 | FANCF    | 0.449563117 |
| 12623 | 1.670671  | 3.7162101 | KIF24    | 0.449563117 |
| 12624 | 0.4410571 | 0.9810795 | KCNMB4   | 0.449563116 |
| 12625 | 67.58003  | 150.35598 | MRPL36   | 0.449466851 |
| 12626 | 4.0125054 | 8.9334284 | INPP5F   | 0.449156272 |
| 12627 | 6.517061  | 14.517677 | CSTF3    | 0.44890522  |
| 12628 | 12.824585 | 28.580698 | PPP4R2   | 0.448714885 |
| 12629 | 7.7434386 | 17.256924 | AK3      | 0.448714884 |
| 12630 | 0.2109307 | 0.4701738 | LEKR1    | 0.448622735 |
| 12631 | 2.032615  | 4.5322328 | METTL4   | 0.448479832 |
| 12632 | 45.118355 | 100.64196 | TBRG4    | 0.448305597 |
| 12633 | 26.022603 | 58.053394 | RAP1A    | 0.448252914 |
| 12634 | 1.4329808 | 3.1981569 | RALGAPA2 | 0.448064573 |
| 12635 | 0.6609401 | 1.4751001 | BHLHB9   | 0.448064573 |
| 12636 | 2.370248  | 5.2899697 | SEC22A   | 0.448064573 |
| 12637 | 6.8065344 | 15.19814  | URB1     | 0.447853122 |
| 12638 | 5.8553085 | 13.080272 | RPUSD4   | 0.44764425  |
| 12639 | 0.7639471 | 1.7069531 | MLH3     | 0.447550148 |
| 12640 | 17.423705 | 38.959845 | LARS     | 0.44722214  |

|       |           |           |           |             |
|-------|-----------|-----------|-----------|-------------|
| 12641 | 1.0670054 | 2.3863265 | ZNF92     | 0.447133046 |
| 12642 | 10.00993  | 22.394205 | TGIF2     | 0.446987495 |
| 12643 | 4.973995  | 11.130778 | FAM53B    | 0.446868574 |
| 12644 | 13.956649 | 31.245947 | BUB1      | 0.446670707 |
| 12645 | 3.1685173 | 7.0963766 | PDS5B     | 0.446497914 |
| 12646 | 10.113897 | 22.65161  | ADA       | 0.446497914 |
| 12647 | 1.1679503 | 2.6185047 | PLEKHA8   | 0.446037132 |
| 12648 | 16.173243 | 36.270864 | UBP1      | 0.445901788 |
| 12649 | 12.335991 | 27.668407 | NGDN      | 0.445851128 |
| 12650 | 19.585144 | 43.950222 | FIP1L1    | 0.445621052 |
| 12651 | 13.77678  | 30.923227 | CSTF2     | 0.445515603 |
| 12652 | 2.0517532 | 4.606403  | HCG11     | 0.445413303 |
| 12653 | 3.933263  | 8.8349741 | DDX31     | 0.445192364 |
| 12654 | 9.3973249 | 21.117082 | DCPS      | 0.445010579 |
| 12655 | 5.4958953 | 12.350033 | KIAA1143  | 0.445010579 |
| 12656 | 9.0194237 | 20.271499 | ZFP64     | 0.444931254 |
| 12657 | 22.186723 | 49.878763 | PPRC1     | 0.444813016 |
| 12658 | 9.107789  | 20.481416 | PRPF40A   | 0.444685504 |
| 12659 | 2.1945139 | 4.9351351 | MTX3      | 0.444671497 |
| 12660 | 19.651707 | 44.199089 | FAM136A   | 0.444617922 |
| 12661 | 8.8565269 | 19.927541 | TRIM65    | 0.44443652  |
| 12662 | 13.100191 | 29.50245  | KLHL21    | 0.444037379 |
| 12663 | 7.0726004 | 15.928933 | MSI2      | 0.44400969  |
| 12664 | 13.668377 | 30.788546 | FCF1      | 0.443943578 |
| 12665 | 3.8690203 | 8.7167318 | UBXN7     | 0.443861341 |
| 12666 | 10.492272 | 23.647181 | IGF1R     | 0.443700732 |
| 12667 | 15.373169 | 34.669163 | KRI1      | 0.443424851 |
| 12668 | 0.1754697 | 0.3959683 | CD101     | 0.443140787 |
| 12669 | 0.554254  | 1.2507402 | LOC728323 | 0.443140787 |
| 12670 | 0.742516  | 1.6755759 | SERP2     | 0.443140787 |
| 12671 | 0.3972036 | 0.8963373 | LINC00652 | 0.443140787 |
| 12672 | 7.1913559 | 16.228152 | LOC152217 | 0.443140787 |
| 12673 | 1.2110383 | 2.7328522 | ZNF713    | 0.443140787 |
| 12674 | 0.4911222 | 1.1082757 | PARD6A    | 0.443140787 |
| 12675 | 1.5058621 | 3.3981572 | ZNF37A    | 0.443140787 |
| 12676 | 0.5412974 | 1.2215021 | DEPDC4    | 0.443140786 |
| 12677 | 1.8612134 | 4.2000499 | CTAGE5    | 0.443140786 |
| 12678 | 0.5436509 | 1.226813  | ZBTB37    | 0.443140786 |
| 12679 | 0.1868495 | 0.4216482 | DUXA      | 0.443140786 |
| 12680 | 1.5315985 | 3.4562345 | ZFP69B    | 0.443140786 |
| 12681 | 0.1549055 | 0.3495627 | CABP4     | 0.443140786 |
| 12682 | 0.2789819 | 0.629556  | NKX3-2    | 0.443140786 |
| 12683 | 0.3858059 | 0.8706171 | HNF1A     | 0.443140786 |

|       |           |           |           |             |
|-------|-----------|-----------|-----------|-------------|
| 12684 | 0.3011553 | 0.6795929 | FLJ44313  | 0.443140786 |
| 12685 | 0.4159671 | 0.9386793 | ELMOD1    | 0.443140786 |
| 12686 | 0.2435522 | 0.5496046 | LINC00649 | 0.443140786 |
| 12687 | 0.1008222 | 0.2275173 | SGSM1     | 0.443140785 |
| 12688 | 101.29994 | 228.72004 | ANP32B    | 0.442899293 |
| 12689 | 26.706424 | 60.302251 | COPS3     | 0.442876067 |
| 12690 | 5.8379013 | 13.195804 | DHX32     | 0.442405893 |
| 12691 | 5.65425   | 12.783162 | AHRR      | 0.442320156 |
| 12692 | 2.4841149 | 5.6200017 | C10orf137 | 0.442013202 |
| 12693 | 1.356068  | 3.0683773 | BAZ2B     | 0.441949548 |
| 12694 | 138.3022  | 312.95965 | PA2G4     | 0.441917038 |
| 12695 | 72.556397 | 164.22115 | GOT2      | 0.44182126  |
| 12696 | 2.4071704 | 5.4485778 | PALB2     | 0.441797936 |
| 12697 | 3.7759354 | 8.5467476 | IQCB1     | 0.441797936 |
| 12698 | 11.516814 | 26.070663 | UCK2      | 0.441753804 |
| 12699 | 3.807393  | 8.6235111 | CLSPN     | 0.441513088 |
| 12700 | 16.730853 | 37.927758 | DIMT1     | 0.441124219 |
| 12701 | 4.1772728 | 9.4714022 | NAA30     | 0.441040593 |
| 12702 | 17.534581 | 39.763792 | OCIAD1    | 0.440968528 |
| 12703 | 0.5355196 | 1.2151036 | CLCN5     | 0.440719252 |
| 12704 | 2.0641474 | 4.6835881 | LONRF3    | 0.440719252 |
| 12705 | 1.8794266 | 4.2644532 | LRRC49    | 0.440719252 |
| 12706 | 29.16718  | 66.218834 | RCC1      | 0.440466525 |
| 12707 | 5.6454739 | 12.817544 | PREPL     | 0.440448967 |
| 12708 | 21.820152 | 49.542027 | FAM83D    | 0.44043721  |
| 12709 | 0.4302683 | 0.9769824 | NBEA      | 0.44040535  |
| 12710 | 2.7802718 | 6.3129836 | CDC37L1   | 0.440405349 |
| 12711 | 0.8909272 | 2.022971  | RAD54B    | 0.440405349 |
| 12712 | 54.14116  | 122.9454  | TWF2      | 0.440367508 |
| 12713 | 2.8883593 | 6.5602512 | FAM8A1    | 0.440281814 |
| 12714 | 1.4132122 | 3.2102717 | PRDM10    | 0.440215765 |
| 12715 | 13.050863 | 29.651174 | EXOSC5    | 0.440146592 |
| 12716 | 2.1686767 | 4.927169  | CEP63     | 0.440146592 |
| 12717 | 1.4269052 | 3.2429815 | DCAF17    | 0.439997944 |
| 12718 | 2.7602583 | 6.2733436 | FASTKD1   | 0.439997944 |
| 12719 | 32.312982 | 73.476142 | MCFD2     | 0.43977516  |
| 12720 | 736.668   | 1675.3246 | RPL26     | 0.43971657  |
| 12721 | 430.66511 | 979.73552 | RPL35A    | 0.439572825 |
| 12722 | 1.7512563 | 3.985128  | MNS1      | 0.439447947 |
| 12723 | 17.280469 | 39.328732 | TCERG1    | 0.439385356 |
| 12724 | 2.5260545 | 5.7528809 | RBM12B    | 0.439093839 |
| 12725 | 8.119461  | 18.503049 | SCFD1     | 0.438817462 |
| 12726 | 2.4517588 | 5.589142  | DUS4L     | 0.438664617 |



|       |           |           |          |             |
|-------|-----------|-----------|----------|-------------|
| 12727 | 1.7793818 | 4.0563604 | ABTB2    | 0.438664617 |
| 12728 | 2.6143306 | 5.9597482 | NKX6-1   | 0.438664617 |
| 12729 | 0.01      | 0.0228099 | AHCTF1P1 | 0.438407072 |
| 12730 | 1.0392953 | 2.3720971 | FAM63B   | 0.438133546 |
| 12731 | 4.4056925 | 10.057574 | POLD3    | 0.438047214 |
| 12732 | 27.464939 | 62.72571  | IGFBP4   | 0.437857754 |
| 12733 | 6.4858157 | 14.81484  | PRKCI    | 0.437791826 |
| 12734 | 2.3325301 | 5.3284552 | GABPA    | 0.437749779 |
| 12735 | 2.1495565 | 4.9113645 | LTN1     | 0.437669912 |
| 12736 | 22.238845 | 50.820585 | GLUD1    | 0.437595225 |
| 12737 | 0.7838586 | 1.7918427 | PAPLN    | 0.437459494 |
| 12738 | 4.3416563 | 9.9247046 | WDR53    | 0.437459494 |
| 12739 | 2.7869175 | 6.3745764 | ZNF473   | 0.437192588 |
| 12740 | 3.405492  | 7.7920053 | DTNB     | 0.437049504 |
| 12741 | 1.6143911 | 3.6957685 | DCP2     | 0.436821488 |
| 12742 | 2.5348332 | 5.8035374 | USP46    | 0.436773821 |
| 12743 | 8.0993925 | 18.55209  | CDK6     | 0.436575738 |
| 12744 | 10.527196 | 24.132951 | SENP2    | 0.436216712 |
| 12745 | 11.794562 | 27.04918  | TCF12    | 0.436041373 |
| 12746 | 17.609979 | 40.395152 | PTGES2   | 0.435942878 |
| 12747 | 8.0681849 | 18.51119  | FOXA2    | 0.435854466 |
| 12748 | 6.3566833 | 14.585699 | NPRL2    | 0.435816145 |
| 12749 | 33.389975 | 76.639501 | TMED10   | 0.435675791 |
| 12750 | 0.8602663 | 1.9759593 | ZSCAN5A  | 0.435366387 |
| 12751 | 0.5878688 | 1.3502853 | FNTB     | 0.435366387 |
| 12752 | 5.6181837 | 12.904496 | PTPLB    | 0.435366387 |
| 12753 | 0.6631647 | 1.5232335 | KAZALD1  | 0.435366386 |
| 12754 | 0.3971405 | 0.9121985 | ZNF670   | 0.435366386 |
| 12755 | 37.077654 | 85.181697 | DDX56    | 0.435277245 |
| 12756 | 3.9967027 | 9.1837231 | SREK1    | 0.435194169 |
| 12757 | 26.21925  | 60.258502 | SNX5     | 0.435112874 |
| 12758 | 34.009641 | 78.17977  | ARCN1    | 0.435018428 |
| 12759 | 7.7318538 | 17.783634 | DHTKD1   | 0.434773568 |
| 12760 | 3.2330321 | 7.4365663 | FAM117A  | 0.434747969 |
| 12761 | 5.368497  | 12.353366 | USP12    | 0.434577679 |
| 12762 | 15.34725  | 35.327293 | DARS     | 0.434430402 |
| 12763 | 227.85511 | 525.03757 | RPL36    | 0.433978675 |
| 12764 | 9.2526918 | 21.336709 | TRAF3    | 0.433651307 |
| 12765 | 2.3033353 | 5.3158814 | RDH10    | 0.433293213 |
| 12766 | 11.15629  | 25.750938 | NMRAL1   | 0.433238199 |
| 12767 | 18.867945 | 43.558822 | HEATR2   | 0.433160138 |
| 12768 | 4.9867885 | 11.512575 | SP110    | 0.433160138 |
| 12769 | 18.652839 | 43.066322 | PLAT     | 0.43311892  |

|       |           |           |           |             |
|-------|-----------|-----------|-----------|-------------|
| 12770 | 3.177217  | 7.3369938 | PHACTR2   | 0.433040712 |
| 12771 | 0.7897244 | 1.8245384 | PALM2     | 0.432835187 |
| 12772 | 1.5962515 | 3.6878968 | ZNF804A   | 0.432835187 |
| 12773 | 3.7709887 | 8.712297  | LINC00667 | 0.432835187 |
| 12774 | 37.76896  | 87.314523 | SCRN1     | 0.432562171 |
| 12775 | 89.953477 | 207.98809 | C1orf43   | 0.432493411 |
| 12776 | 149.93658 | 346.70407 | SLC25A5   | 0.432462695 |
| 12777 | 14.359683 | 33.205542 | THEM6     | 0.432448381 |
| 12778 | 2.639421  | 6.1041474 | TSPAN7    | 0.432397979 |
| 12779 | 2.7051093 | 6.2582941 | PCMTD2    | 0.432243882 |
| 12780 | 20.372838 | 47.24373  | MMS19     | 0.4312284   |
| 12781 | 0.01      | 0.0231957 | ZAN       | 0.431113514 |
| 12782 | 4.2996673 | 9.9734347 | NUDT16    | 0.431111992 |
| 12783 | 3.4919487 | 8.1051413 | MAP3K14   | 0.43083132  |
| 12784 | 0.740581  | 1.7189582 | SLX4IP    | 0.43083132  |
| 12785 | 1.0255881 | 2.3804864 | UFSP1     | 0.43083132  |
| 12786 | 3.9474478 | 9.1706968 | BTBD3     | 0.430441428 |
| 12787 | 19.285589 | 44.819342 | GPATCH4   | 0.430296126 |
| 12788 | 1.6192317 | 3.7668539 | NFATC1    | 0.42986316  |
| 12789 | 2.0425066 | 4.7531958 | EIF3C     | 0.429712278 |
| 12790 | 1.4732612 | 3.4325308 | RPAP2     | 0.429205542 |
| 12791 | 1.683109  | 3.9214522 | IER5L     | 0.429205542 |
| 12792 | 90.832549 | 211.82772 | HNRNPA1   | 0.428803879 |
| 12793 | 40.785038 | 95.115272 | BOP1      | 0.428795897 |
| 12794 | 21.701632 | 50.618449 | SNHG8     | 0.428729704 |
| 12795 | 8.104425  | 18.904876 | BCL9L     | 0.428694966 |
| 12796 | 15.989038 | 37.304261 | NOA1      | 0.42861158  |
| 12797 | 2.1183844 | 4.9488976 | CREBZF    | 0.428051763 |
| 12798 | 6.7833472 | 15.854125 | DNAJC2    | 0.42786007  |
| 12799 | 2.4958024 | 5.8332211 | HSD17B8   | 0.42786007  |
| 12800 | 0.9410916 | 2.1995312 | CEP290    | 0.42786007  |
| 12801 | 6.3127892 | 14.757452 | NCBP1     | 0.427769575 |
| 12802 | 21.42686  | 50.094145 | KCNG1     | 0.427731814 |
| 12803 | 14.056855 | 32.864547 | NUP205    | 0.427720928 |
| 12804 | 23.275788 | 54.444094 | MRPS22    | 0.427517233 |
| 12805 | 3.906793  | 9.1400024 | ATRX      | 0.427438948 |
| 12806 | 17.579278 | 41.132214 | RPL39L    | 0.42738467  |
| 12807 | 4.3948194 | 10.283053 | NVL       | 0.427384669 |
| 12808 | 2.6679614 | 6.2431115 | ELK4      | 0.427344824 |
| 12809 | 31.251292 | 73.138324 | PDCD6     | 0.427290241 |
| 12810 | 6.8958886 | 16.144947 | IGSF3     | 0.42712365  |
| 12811 | 2.2967462 | 5.3777268 | COX16     | 0.427084961 |
| 12812 | 1.2550208 | 2.938574  | CRMP1     | 0.427084961 |

|       |           |           |              |             |
|-------|-----------|-----------|--------------|-------------|
| 12813 | 6.2086876 | 14.537359 | MCCC1        | 0.427084961 |
| 12814 | 1.8680872 | 4.3776985 | ZNF562       | 0.426728165 |
| 12815 | 1.6195803 | 3.7983566 | ARHGAP39     | 0.42638976  |
| 12816 | 48.564288 | 113.93518 | MARCKSL1     | 0.426244894 |
| 12817 | 42.493607 | 99.735581 | STAU1        | 0.426062667 |
| 12818 | 15.830049 | 37.162122 | ADNP         | 0.425972693 |
| 12819 | 0.2603599 | 0.6115141 | PTGIS        | 0.425762717 |
| 12820 | 0.7236094 | 1.6995602 | ZNF57        | 0.425762717 |
| 12821 | 0.6603877 | 1.5510699 | ZNF675       | 0.425762717 |
| 12822 | 0.5956703 | 1.3990663 | TPK1         | 0.425762717 |
| 12823 | 1.7373519 | 4.0805638 | LOC440894    | 0.425762716 |
| 12824 | 3.7025292 | 8.6962269 | BDH1         | 0.425762716 |
| 12825 | 1.0151681 | 2.3843517 | ZBED3        | 0.425762716 |
| 12826 | 6.6199511 | 15.548452 | SWAP70       | 0.425762716 |
| 12827 | 259.90808 | 610.48919 | RPL37        | 0.425737395 |
| 12828 | 4.617974  | 10.853775 | LOC100506548 | 0.425471696 |
| 12829 | 1.7644809 | 4.150871  | C3orf58      | 0.425086903 |
| 12830 | 26.900515 | 63.287377 | YTHDF1       | 0.425053407 |
| 12831 | 9.4760961 | 22.29799  | GPANK1       | 0.42497536  |
| 12832 | 22.14745  | 52.128893 | TSG101       | 0.424859401 |
| 12833 | 2.9200837 | 6.873309  | TACC2        | 0.424843936 |
| 12834 | 24.694738 | 58.144912 | PRSS23       | 0.424710219 |
| 12835 | 12.145836 | 28.600201 | ZNF664       | 0.424676587 |
| 12836 | 4.3338052 | 10.204954 | MND1         | 0.424676587 |
| 12837 | 11.815975 | 27.831481 | ZDHHC6       | 0.424554308 |
| 12838 | 26.828265 | 63.192796 | DDX27        | 0.424546251 |
| 12839 | 33.819529 | 79.668896 | NUP93        | 0.424501042 |
| 12840 | 3.5476126 | 8.3575057 | DSCC1        | 0.424482227 |
| 12841 | 25.685834 | 60.52411  | RPL36A       | 0.424390118 |
| 12842 | 5.5293554 | 13.030846 | RBBP8        | 0.424328206 |
| 12843 | 22.398475 | 52.796146 | ABHD14B      | 0.424244508 |
| 12844 | 1.5878057 | 3.7430314 | LOC646278    | 0.424203146 |
| 12845 | 4.0113561 | 9.4585241 | POLA1        | 0.424099581 |
| 12846 | 16.661381 | 39.290419 | TRIO         | 0.424057107 |
| 12847 | 7.3760793 | 17.39419  | GMFB         | 0.424054198 |
| 12848 | 7.72634   | 18.220171 | PRKD3        | 0.424054198 |
| 12849 | 8.7594306 | 20.657635 | SETDB1       | 0.42402872  |
| 12850 | 2.6141663 | 6.1653061 | CAPRIN2      | 0.424012407 |
| 12851 | 0.9343225 | 2.203913  | JMY          | 0.423938019 |
| 12852 | 10.678392 | 25.198645 | DPY19L1      | 0.423768512 |
| 12853 | 3.9599601 | 9.3446304 | DDX11        | 0.423768512 |
| 12854 | 1.8461818 | 4.3577913 | BEND3        | 0.423650798 |
| 12855 | 23.00202  | 54.307561 | ANP32E       | 0.423550962 |

|       |           |           |          |             |
|-------|-----------|-----------|----------|-------------|
| 12856 | 8.9834348 | 21.211443 | DDX50    | 0.423518316 |
| 12857 | 1.4343844 | 3.3880313 | ALDH1L2  | 0.4233681   |
| 12858 | 1.1098198 | 2.6236998 | LIPT1    | 0.422998023 |
| 12859 | 31.391256 | 74.225122 | ADAM19   | 0.42291956  |
| 12860 | 4.1317116 | 9.7785142 | HIVEP3   | 0.422529587 |
| 12861 | 22.322568 | 52.84388  | HRAS     | 0.422424855 |
| 12862 | 3.1104403 | 7.3648467 | TBC1D23  | 0.422336055 |
| 12863 | 9.9611353 | 23.591035 | DCAF13   | 0.4222424   |
| 12864 | 4.2847335 | 10.14946  | DHX35    | 0.422163708 |
| 12865 | 1.7001795 | 4.0284905 | FAM115C  | 0.422038844 |
| 12866 | 7.1033915 | 16.83597  | SARS2    | 0.421917569 |
| 12867 | 9.4727046 | 22.451553 | TIMM21   | 0.421917569 |
| 12868 | 1.1579825 | 2.7455882 | NMNAT2   | 0.421761187 |
| 12869 | 1.3136931 | 3.1185054 | PPAN     | 0.421257291 |
| 12870 | 0.595118  | 1.4127186 | TM4SF18  | 0.421257291 |
| 12871 | 2.1171327 | 5.0297939 | BLM      | 0.420918387 |
| 12872 | 4.4998543 | 10.698446 | PPWD1    | 0.420608204 |
| 12873 | 0.01      | 0.0237927 | UNC79    | 0.420297229 |
| 12874 | 23.37524  | 55.623192 | TRIP12   | 0.420242681 |
| 12875 | 0.8020111 | 1.909275  | C8orf37  | 0.420060537 |
| 12876 | 2.1050455 | 5.0112907 | PRR5     | 0.420060537 |
| 12877 | 12.734165 | 30.31507  | C9orf142 | 0.420060537 |
| 12878 | 9.5992946 | 22.865394 | SORT1    | 0.419817587 |
| 12879 | 8.4251879 | 20.070906 | NOL9     | 0.419771173 |
| 12880 | 6.6912822 | 15.943757 | ACAT1    | 0.419680392 |
| 12881 | 3.4143862 | 8.1373911 | LYSMD2   | 0.419592242 |
| 12882 | 14.810117 | 35.29645  | C14orf1  | 0.419592242 |
| 12883 | 11.125128 | 26.518024 | UBR7     | 0.419530827 |
| 12884 | 12.078059 | 28.79255  | ANGPTL4  | 0.419485584 |
| 12885 | 3.3318361 | 7.9453816 | SS18L1   | 0.419342485 |
| 12886 | 0.3220017 | 0.7681572 | LAMA2    | 0.419187231 |
| 12887 | 2.2107443 | 5.2738828 | ZNF800   | 0.41918723  |
| 12888 | 2.0219874 | 4.8235901 | ZNF507   | 0.41918723  |
| 12889 | 6.3884235 | 15.247379 | HECTD1   | 0.418985018 |
| 12890 | 5.2427547 | 12.517516 | BRI3BP   | 0.418833486 |
| 12891 | 51.867494 | 123.87731 | LAPTM4B  | 0.418700511 |
| 12892 | 7.4850482 | 17.906898 | MIS18A   | 0.417998047 |
| 12893 | 4.7846824 | 11.451582 | TADA2B   | 0.417818456 |
| 12894 | 2.0979815 | 5.0242033 | ZMYM1    | 0.417574972 |
| 12895 | 26.908727 | 64.451015 | RRP1     | 0.41750664  |
| 12896 | 15.929739 | 38.17643  | PRKAR2A  | 0.417266343 |
| 12897 | 4.8100236 | 11.528577 | CCDC106  | 0.417226121 |
| 12898 | 7.2816754 | 17.4569   | ILF3-AS1 | 0.417123051 |

|       |           |           |              |             |
|-------|-----------|-----------|--------------|-------------|
| 12899 | 0.572652  | 1.373485  | TMEM135      | 0.416933536 |
| 12900 | 6.1514143 | 14.762758 | GTF2A1       | 0.41668462  |
| 12901 | 27.740936 | 66.575378 | GGCT         | 0.41668462  |
| 12902 | 13.88215  | 33.321715 | EXOSC7       | 0.416609704 |
| 12903 | 7.5707895 | 18.173954 | PARN         | 0.416573593 |
| 12904 | 14.446017 | 34.684696 | POGZ         | 0.416495427 |
| 12905 | 4.8996097 | 11.765993 | STIL         | 0.416421262 |
| 12906 | 2.8273018 | 6.7917655 | MAPKAPK5-AS1 | 0.416283769 |
| 12907 | 3.7531664 | 9.017117  | SMC6         | 0.416226869 |
| 12908 | 2.6507673 | 6.3693983 | FAM199X      | 0.416172329 |
| 12909 | 3.8082003 | 9.1525205 | REST         | 0.41608214  |
| 12910 | 1.9828203 | 4.7694904 | ROR2         | 0.415730016 |
| 12911 | 2.7504503 | 6.615953  | ZNF143       | 0.415730016 |
| 12912 | 15.249551 | 36.694505 | PTPN11       | 0.415581319 |
| 12913 | 15.768088 | 37.944069 | SLC5A6       | 0.415561349 |
| 12914 | 2.6225281 | 6.3112729 | FAM35A       | 0.415530769 |
| 12915 | 63.792303 | 153.52641 | TPX2         | 0.415513555 |
| 12916 | 265.04057 | 638.02191 | BTF3         | 0.415409824 |
| 12917 | 9.9547009 | 23.963893 | LPXN         | 0.415404173 |
| 12918 | 2.0817803 | 5.0119231 | IKZF5        | 0.41536558  |
| 12919 | 4.6412116 | 11.177544 | HOXC8        | 0.415226406 |
| 12920 | 12.678297 | 30.551486 | PPP2R2A      | 0.414981339 |
| 12921 | 2.9602202 | 7.1352166 | PDK1         | 0.414874605 |
| 12922 | 4.6771357 | 11.277426 | NAV3         | 0.414734326 |
| 12923 | 10.895848 | 26.28057  | IKBIP        | 0.414597096 |
| 12924 | 11.336488 | 27.348387 | CHD8         | 0.414521277 |
| 12925 | 28.389564 | 68.518979 | MRGBP        | 0.414331397 |
| 12926 | 7.9666541 | 19.24207  | KIF11        | 0.414022706 |
| 12927 | 0.0454079 | 0.1097875 | F5           | 0.413598072 |
| 12928 | 0.0478804 | 0.1157656 | SPTBN4       | 0.413598071 |
| 12929 | 0.0592718 | 0.1433076 | REXO1L1      | 0.41359807  |
| 12930 | 0.0845434 | 0.2044096 | SLC26A4      | 0.413598069 |
| 12931 | 0.1466053 | 0.3544633 | LILRB3       | 0.413598069 |
| 12932 | 0.1092527 | 0.2641518 | C9orf139     | 0.413598068 |
| 12933 | 0.1465538 | 0.3543387 | CHIAP2       | 0.413598068 |
| 12934 | 0.2101861 | 0.5081892 | CSF2RA       | 0.413598068 |
| 12935 | 0.3063572 | 0.7407124 | FAM149A      | 0.413598068 |
| 12936 | 0.2735799 | 0.6614632 | ENOX1        | 0.413598068 |
| 12937 | 0.2506308 | 0.6059767 | ACP5         | 0.413598068 |
| 12938 | 0.12924   | 0.3124773 | ARSI         | 0.413598068 |
| 12939 | 0.8269821 | 1.9994826 | KTN1-AS1     | 0.413598068 |
| 12940 | 10.329591 | 24.97495  | HOXB2        | 0.413598068 |
| 12941 | 1.3997219 | 3.3842563 | RBAK         | 0.413598068 |

|       |           |           |              |             |
|-------|-----------|-----------|--------------|-------------|
| 12942 | 0.1481689 | 0.3582436 | FSIP1        | 0.413598068 |
| 12943 | 0.2268911 | 0.5485788 | CCDC11       | 0.413598067 |
| 12944 | 0.9090491 | 2.1979045 | SENP8        | 0.413598067 |
| 12945 | 1.8817111 | 4.5496128 | OPHN1        | 0.413598067 |
| 12946 | 1.5008194 | 3.6286907 | COX10-AS1    | 0.413598067 |
| 12947 | 6.6955663 | 16.188582 | MSMO1        | 0.413598067 |
| 12948 | 0.5784055 | 1.3984724 | KIF9         | 0.413598067 |
| 12949 | 7.4663678 | 18.052231 | ELP2         | 0.413598067 |
| 12950 | 1.7105294 | 4.1357287 | C9orf116     | 0.413598067 |
| 12951 | 0.5640041 | 1.3636526 | TMEM161B-AS1 | 0.413598067 |
| 12952 | 0.6365773 | 1.5391206 | TBXA2R       | 0.413598067 |
| 12953 | 1.7936482 | 4.3366939 | FAM86C2P     | 0.413598067 |
| 12954 | 8.2849157 | 20.031321 | PDPR         | 0.413598067 |
| 12955 | 0.74645   | 1.8047714 | CRIPAK       | 0.413598067 |
| 12956 | 0.094128  | 0.2275834 | CD209        | 0.413598067 |
| 12957 | 0.65329   | 1.5795286 | HERC2P10     | 0.413598067 |
| 12958 | 0.2675218 | 0.6468159 | LOC339666    | 0.413598067 |
| 12959 | 0.1332904 | 0.3222703 | LRRC4C       | 0.413598067 |
| 12960 | 0.1624947 | 0.3928808 | ACADL        | 0.413598067 |
| 12961 | 0.7785785 | 1.8824519 | C10orf25     | 0.413598067 |
| 12962 | 0.2987806 | 0.7223937 | FANK1        | 0.413598067 |
| 12963 | 0.326773  | 0.7900739 | C3orf67      | 0.413598067 |
| 12964 | 0.0960809 | 0.232305  | MAP6         | 0.413598067 |
| 12965 | 0.2262138 | 0.5469412 | CCDC150      | 0.413598067 |
| 12966 | 0.1247154 | 0.3015378 | LANCL3       | 0.413598067 |
| 12967 | 0.1743929 | 0.4216482 | SAMD3        | 0.413598067 |
| 12968 | 0.1200804 | 0.2903311 | GOLGA8T      | 0.413598067 |
| 12969 | 0.1423494 | 0.3441732 | POU3F1       | 0.413598067 |
| 12970 | 0.1608641 | 0.3889383 | LOC286297    | 0.413598067 |
| 12971 | 0.0822738 | 0.1989221 | NPC1L1       | 0.413598066 |
| 12972 | 0.1820878 | 0.4402531 | PCDHGB5      | 0.413598066 |
| 12973 | 0.1610506 | 0.3893892 | ZNF799       | 0.413598066 |
| 12974 | 0.1415757 | 0.3423027 | NIM1         | 0.413598066 |
| 12975 | 0.1329078 | 0.3213454 | COLQ         | 0.413598065 |
| 12976 | 31.276005 | 75.6582   | EIF2S2       | 0.41338553  |
| 12977 | 10.250116 | 24.811118 | CHID1        | 0.413125923 |
| 12978 | 93.628761 | 226.93018 | SF3B4        | 0.412588396 |
| 12979 | 6.4747152 | 15.696353 | GINS3        | 0.412498072 |
| 12980 | 7.4321686 | 18.023723 | ATAD2        | 0.412354787 |
| 12981 | 11.431196 | 27.744719 | DENND4B      | 0.4120134   |
| 12982 | 14.554886 | 35.333079 | METAP1       | 0.411933689 |
| 12983 | 1.8339755 | 4.4522962 | DZIP3        | 0.411916774 |
| 12984 | 10.414819 | 25.297363 | ELL2         | 0.411695842 |

|       |           |           |            |             |
|-------|-----------|-----------|------------|-------------|
| 12985 | 9.461677  | 22.993817 | ZNRD1      | 0.411487873 |
| 12986 | 14.805314 | 35.981855 | YLPM1      | 0.411466118 |
| 12987 | 3.5476569 | 8.6265616 | SPIN4      | 0.411248078 |
| 12988 | 2.8561368 | 6.9532102 | GID4       | 0.410765204 |
| 12989 | 2.5201248 | 6.1361843 | SOCS4      | 0.410699016 |
| 12990 | 17.557707 | 42.767934 | SERP1      | 0.410534378 |
| 12991 | 2.7910647 | 6.8044893 | LONRF1     | 0.410179901 |
| 12992 | 9.9596548 | 24.282873 | SUPV3L1    | 0.410151417 |
| 12993 | 23.496022 | 57.302819 | NUDT5      | 0.410032567 |
| 12994 | 10.787862 | 26.31087  | GIGYF2     | 0.410015408 |
| 12995 | 124.01087 | 302.58829 | CCT5       | 0.409833669 |
| 12996 | 1.2539798 | 3.0607553 | GPR126     | 0.409696199 |
| 12997 | 0.6125965 | 1.4952458 | FANCM      | 0.409696199 |
| 12998 | 6.5668787 | 16.030476 | NR1D2      | 0.409649637 |
| 12999 | 2.5917512 | 6.3303881 | SETX       | 0.409414272 |
| 13000 | 5.2697927 | 12.875457 | SLAIN2     | 0.409289754 |
| 13001 | 2.2294992 | 5.4472391 | ABHD16B    | 0.409289754 |
| 13002 | 4.0155479 | 9.8166926 | PPP2R1B    | 0.409053034 |
| 13003 | 10.128577 | 24.761037 | PROSER1    | 0.409053033 |
| 13004 | 0.3490091 | 0.8537639 | APC2       | 0.408788788 |
| 13005 | 0.8559535 | 2.0938771 | GABPB1-AS1 | 0.408788788 |
| 13006 | 9.2041219 | 22.528522 | RPIA       | 0.408554188 |
| 13007 | 20.875332 | 51.09985  | C20orf27   | 0.408520413 |
| 13008 | 18.539114 | 45.464328 | NUP88      | 0.407772743 |
| 13009 | 2.8209012 | 6.9253217 | NBPF15     | 0.40733143  |
| 13010 | 6.7939764 | 16.684913 | ZBTB9      | 0.407192788 |
| 13011 | 6.1959266 | 15.218337 | NHEJ1      | 0.407135598 |
| 13012 | 7.6392779 | 18.765819 | TCF7L2     | 0.407084712 |
| 13013 | 6.9780828 | 17.145247 | SLMAP      | 0.406998098 |
| 13014 | 4.16799   | 10.243808 | HMGCS1     | 0.406878965 |
| 13015 | 5.6823066 | 13.966237 | METTL16    | 0.406860254 |
| 13016 | 6.7289176 | 16.53905  | C2CD2      | 0.406850306 |
| 13017 | 1.801076  | 4.4272303 | FBXL4      | 0.406817771 |
| 13018 | 4.8522378 | 11.930614 | NFRKB      | 0.406704766 |
| 13019 | 2.5846855 | 6.3563991 | STRN       | 0.406627313 |
| 13020 | 5.9923179 | 14.738678 | ASB13      | 0.406570916 |
| 13021 | 22.178898 | 54.5776   | GTPBP4     | 0.406373647 |
| 13022 | 6.4093043 | 15.77821  | IPO8       | 0.406212388 |
| 13023 | 9.6574091 | 23.783565 | USP1       | 0.406053897 |
| 13024 | 2.2204898 | 5.4739831 | ZNF148     | 0.405644258 |
| 13025 | 11.923073 | 29.401503 | DCAF12     | 0.405525986 |
| 13026 | 2.4186327 | 5.9699778 | CPS1       | 0.40513261  |
| 13027 | 7.4309914 | 18.351698 | SAV1       | 0.404921185 |

|       |           |           |           |             |
|-------|-----------|-----------|-----------|-------------|
| 13028 | 30.635507 | 75.6748   | SNRPA1    | 0.404831026 |
| 13029 | 9.1007488 | 22.484604 | DNTTIP2   | 0.404754688 |
| 13030 | 1.752893  | 4.3323369 | CTH       | 0.404606805 |
| 13031 | 3.8832205 | 9.5975165 | C4orf48   | 0.404606805 |
| 13032 | 0.4187532 | 1.0349633 | ZNF100    | 0.404606805 |
| 13033 | 1.1285754 | 2.7910463 | BNC2      | 0.404355652 |
| 13034 | 32.269899 | 79.809136 | C19orf48  | 0.404338409 |
| 13035 | 2.4071022 | 5.9542123 | APBB2     | 0.404268788 |
| 13036 | 3.0045863 | 7.4334495 | SMC5      | 0.404198111 |
| 13037 | 2.597443  | 6.4261632 | RBM15     | 0.404198111 |
| 13038 | 15.423715 | 38.158801 | ALG8      | 0.404198111 |
| 13039 | 42.762041 | 105.83794 | LY6E      | 0.4040332   |
| 13040 | 4.5088267 | 11.160148 | AGPAT9    | 0.404011357 |
| 13041 | 8.3638595 | 20.703673 | CWC27     | 0.403979508 |
| 13042 | 0.5406795 | 1.3386324 | RAB3IP    | 0.403904363 |
| 13043 | 10.162524 | 25.16072  | GCSH      | 0.403904363 |
| 13044 | 4.2915161 | 10.628445 | ACAP2     | 0.403776477 |
| 13045 | 6.0588785 | 15.009549 | CDC5L     | 0.40366826  |
| 13046 | 8.9741412 | 22.240178 | EFNB1     | 0.40351031  |
| 13047 | 2.7264039 | 6.7567144 | MIPEP     | 0.40351031  |
| 13048 | 1.3702654 | 3.3994634 | PTBP2     | 0.403082862 |
| 13049 | 10.610157 | 26.330939 | SLTM      | 0.402953999 |
| 13050 | 8.7594501 | 21.739677 | ARHGAP21  | 0.402924569 |
| 13051 | 3.3289714 | 8.262493  | SYNJ2BP   | 0.402901566 |
| 13052 | 4.9009204 | 12.169732 | PM20D2    | 0.402713908 |
| 13053 | 2.8779785 | 7.1494091 | UTP23     | 0.402547737 |
| 13054 | 4.8477122 | 12.048508 | SLC25A12  | 0.402349584 |
| 13055 | 3.5503121 | 8.8239486 | FBXO28    | 0.402349584 |
| 13056 | 15.506503 | 38.542444 | RASA3     | 0.402322779 |
| 13057 | 0.7609789 | 1.892468  | LOC731275 | 0.402109232 |
| 13058 | 0.6547561 | 1.628304  | LOC646329 | 0.402109232 |
| 13059 | 0.8015365 | 1.9933304 | KITLG     | 0.402109232 |
| 13060 | 2.7182544 | 6.7599899 | DUSP4     | 0.402109232 |
| 13061 | 8.687006  | 21.603597 | CLPX      | 0.402109232 |
| 13062 | 0.3931006 | 0.9775967 | NSUN7     | 0.402109232 |
| 13063 | 4.276428  | 10.634991 | ZNF326    | 0.402109232 |
| 13064 | 7.8858149 | 19.622076 | UBE2K     | 0.401884841 |
| 13065 | 2.737883  | 6.8168524 | CLASP2    | 0.401634487 |
| 13066 | 4.185126  | 10.421592 | SENP5     | 0.401582221 |
| 13067 | 8.4032057 | 20.926843 | BATF3     | 0.401551522 |
| 13068 | 88.710598 | 220.95364 | RPL36AL   | 0.401489649 |
| 13069 | 0.1472008 | 0.3668954 | CNGB1     | 0.401206436 |
| 13070 | 19.255392 | 48.010676 | USP14     | 0.401064793 |



|       |           |           |           |             |
|-------|-----------|-----------|-----------|-------------|
| 13071 | 2.0568682 | 5.1316717 | PIK3R1    | 0.400818352 |
| 13072 | 8.9881429 | 22.439128 | MRPL48    | 0.400556687 |
| 13073 | 73.391161 | 183.32883 | SLIRP     | 0.400325252 |
| 13074 | 1.0104218 | 2.5244377 | MPP4      | 0.400256194 |
| 13075 | 0.9849523 | 2.4608048 | KLF15     | 0.400256194 |
| 13076 | 15.502745 | 38.741594 | SUB1      | 0.400157658 |
| 13077 | 41.774573 | 104.43635 | MCM2      | 0.400000323 |
| 13078 | 2.095303  | 5.2429459 | RLF       | 0.399642304 |
| 13079 | 0.6605988 | 1.6535717 | NAPEPLD   | 0.399498133 |
| 13080 | 6.233015  | 15.613125 | NUP160    | 0.39921636  |
| 13081 | 15.416237 | 38.628875 | TMEM69    | 0.399085854 |
| 13082 | 22.372663 | 56.065208 | MRPS30    | 0.399047176 |
| 13083 | 20.940464 | 52.493169 | RPUSD3    | 0.398917889 |
| 13084 | 3.0399927 | 7.6209071 | ZFYVE9    | 0.398901689 |
| 13085 | 21.906288 | 54.926833 | TEAD4     | 0.398826708 |
| 13086 | 6.4106207 | 16.077592 | NAF1      | 0.398730163 |
| 13087 | 24.650684 | 61.846397 | PPIL1     | 0.398579143 |
| 13088 | 2.4006525 | 6.0254293 | CHRNA5    | 0.398420157 |
| 13089 | 2.2301404 | 5.5985513 | FAM210A   | 0.398342401 |
| 13090 | 6.4196628 | 16.123828 | PGAP2     | 0.398147565 |
| 13091 | 7.5792374 | 19.039094 | TNRC18    | 0.39808814  |
| 13092 | 8.4555958 | 21.241807 | PRPSAP2   | 0.398063868 |
| 13093 | 9.7411618 | 24.479496 | PPIG      | 0.397931474 |
| 13094 | 0.8830487 | 2.2204424 | PDF       | 0.39769045  |
| 13095 | 0.6089991 | 1.5313396 | ZNF625    | 0.39769045  |
| 13096 | 0.2727742 | 0.6858958 | PUS10     | 0.39769045  |
| 13097 | 4.3807703 | 11.015528 | ALDOC     | 0.39769045  |
| 13098 | 0.5513214 | 1.3863079 | SETD5-AS1 | 0.39769045  |
| 13099 | 2.3104157 | 5.8095832 | TERC      | 0.397690449 |
| 13100 | 40.613788 | 102.12412 | POLR2H    | 0.397690449 |
| 13101 | 0.2833825 | 0.7125706 | ATF7IP2   | 0.397690449 |
| 13102 | 0.1611752 | 0.405278  | GOLGA7B   | 0.397690449 |
| 13103 | 14.567823 | 36.649181 | RRP12     | 0.397493816 |
| 13104 | 10.367555 | 26.099451 | FOXJ3     | 0.397232676 |
| 13105 | 0.01      | 0.025184  | MUC6      | 0.397076926 |
| 13106 | 1.4324134 | 3.6082735 | ZBTB39    | 0.396980288 |
| 13107 | 26.836313 | 67.619033 | C8orf33   | 0.396875139 |
| 13108 | 5.7151675 | 14.410375 | SMIM20    | 0.396600887 |
| 13109 | 4.3336564 | 10.928891 | ASCC3     | 0.396532128 |
| 13110 | 3.7393177 | 9.4324094 | ENOSF1    | 0.39643293  |
| 13111 | 13.31134  | 33.578574 | UBE3A     | 0.396423631 |
| 13112 | 7.0786529 | 17.856852 | GMEB2     | 0.396411016 |
| 13113 | 9.0195683 | 22.771693 | GEM       | 0.396086859 |

|       |           |           |              |             |
|-------|-----------|-----------|--------------|-------------|
| 13114 | 14.444918 | 36.484772 | RFC4         | 0.395916366 |
| 13115 | 6.0769931 | 15.354561 | TBL1XR1      | 0.39577771  |
| 13116 | 1.8625996 | 4.7081053 | COBLL1       | 0.395615543 |
| 13117 | 0.5855184 | 1.4810086 | NANOS1       | 0.395351094 |
| 13118 | 1.9546851 | 4.9441752 | HES6         | 0.395351094 |
| 13119 | 3.1068733 | 7.858517  | BOLA1        | 0.395351094 |
| 13120 | 1.8895198 | 4.7793464 | VWA8         | 0.395351094 |
| 13121 | 0.4342352 | 1.0983534 | RAPGEF3      | 0.395351094 |
| 13122 | 1.0763582 | 2.7225375 | SHF          | 0.395351094 |
| 13123 | 4.9008359 | 12.400401 | ORC2         | 0.395215931 |
| 13124 | 7.5614603 | 19.136452 | GTPBP5       | 0.395133868 |
| 13125 | 2.8754202 | 7.2832665 | ARHGEF19     | 0.394798155 |
| 13126 | 1.4583446 | 3.6948452 | ZDBF2        | 0.39469708  |
| 13127 | 0.8866763 | 2.2473058 | ANKRD26      | 0.394550788 |
| 13128 | 17.492801 | 44.366074 | MAPK1IP1L    | 0.39428327  |
| 13129 | 4.3246568 | 10.969127 | UCHL5        | 0.39425715  |
| 13130 | 2.0923645 | 5.3089027 | ARID2        | 0.394123719 |
| 13131 | 23.824734 | 60.45141  | EIF2B2       | 0.39411379  |
| 13132 | 1.4264779 | 3.6213945 | SH3BGRL2     | 0.393902921 |
| 13133 | 6.1503937 | 15.613983 | LRR8D        | 0.393902921 |
| 13134 | 1.6622094 | 4.2198453 | MGC12916     | 0.393902921 |
| 13135 | 7.935497  | 20.154785 | LPIN1        | 0.393727698 |
| 13136 | 36.175661 | 91.901801 | TRIP13       | 0.393633862 |
| 13137 | 15.032095 | 38.194969 | SDHD         | 0.393562175 |
| 13138 | 1.5552202 | 3.9526044 | LOC100288637 | 0.393467188 |
| 13139 | 4.065288  | 10.346399 | ISG20        | 0.392918164 |
| 13140 | 2.4639642 | 6.2709349 | POLG2        | 0.392918164 |
| 13141 | 8.1199936 | 20.676998 | HIPK2        | 0.392706605 |
| 13142 | 8.2425643 | 20.9918   | C1QL1        | 0.392656393 |
| 13143 | 9.7549836 | 24.848718 | RPRD2        | 0.392574929 |
| 13144 | 11.57775  | 29.500059 | MTA3         | 0.392465319 |
| 13145 | 8.2467214 | 21.018025 | HAUS7        | 0.392364238 |
| 13146 | 1.3409737 | 3.4190626 | ZNF267       | 0.392205064 |
| 13147 | 2.4669298 | 6.2898978 | SRBD1        | 0.392205064 |
| 13148 | 10.890014 | 27.815223 | KPNA3        | 0.391512734 |
| 13149 | 29.725325 | 75.960244 | RDH11        | 0.391327402 |
| 13150 | 9.5197878 | 24.328853 | MAPK6        | 0.391296211 |
| 13151 | 1.9031918 | 4.8644947 | HSD17B7      | 0.391241415 |
| 13152 | 1.119854  | 2.8623095 | BCL11B       | 0.391241415 |
| 13153 | 0.4873214 | 1.2455771 | CELSR3       | 0.391241415 |
| 13154 | 34.640131 | 88.616212 | ATP5I        | 0.390900613 |
| 13155 | 8.0467473 | 20.598315 | TCF20        | 0.390650751 |
| 13156 | 3.5321949 | 9.0425255 | LINC00263    | 0.390620397 |

|       |           |           |              |             |
|-------|-----------|-----------|--------------|-------------|
| 13157 | 6.6855935 | 17.118943 | CKAP2L       | 0.390537743 |
| 13158 | 17.020159 | 43.601685 | MRFAP1L1     | 0.390355525 |
| 13159 | 8.3258197 | 21.372151 | ATP13A3      | 0.389563952 |
| 13160 | 4.8870383 | 12.553466 | MET          | 0.389297941 |
| 13161 | 3.344301  | 8.5949825 | OSBPL3       | 0.389099227 |
| 13162 | 16.019921 | 41.179365 | PROCR        | 0.389027885 |
| 13163 | 29.356586 | 75.502444 | MRPL2        | 0.388816365 |
| 13164 | 24.120313 | 62.14392  | PTPN12       | 0.388136324 |
| 13165 | 586.80328 | 1512.3601 | RPL14        | 0.388004999 |
| 13166 | 0.0528799 | 0.1363768 | PRLR         | 0.387748189 |
| 13167 | 0.1547138 | 0.3990059 | ANKRD24      | 0.387748189 |
| 13168 | 0.1664828 | 0.4293581 | KCNQ3        | 0.387748189 |
| 13169 | 0.1903771 | 0.4909814 | CASC2        | 0.387748189 |
| 13170 | 0.1598156 | 0.4121633 | CES3         | 0.387748189 |
| 13171 | 0.2568605 | 0.6624416 | NKAPP1       | 0.387748189 |
| 13172 | 0.4373547 | 1.1279348 | BAALC        | 0.387748188 |
| 13173 | 0.2314693 | 0.5969577 | C1RL-AS1     | 0.387748188 |
| 13174 | 0.1721362 | 0.443938  | SYT12        | 0.387748188 |
| 13175 | 0.3079796 | 0.7942772 | GPR89A       | 0.387748188 |
| 13176 | 13.397111 | 34.55106  | LAP3         | 0.387748188 |
| 13177 | 0.1828066 | 0.471457  | NGFR         | 0.387748188 |
| 13178 | 1.0019207 | 2.5839468 | LOC100289341 | 0.387748188 |
| 13179 | 6.9894975 | 18.025868 | ANKZF1       | 0.387748188 |
| 13180 | 0.2379895 | 0.6137734 | LPAR4        | 0.387748188 |
| 13181 | 5.1862173 | 13.37522  | NDUFAF4      | 0.387748188 |
| 13182 | 0.4396614 | 1.1338838 | LOC100129961 | 0.387748188 |
| 13183 | 3.4149498 | 8.8071328 | C14orf93     | 0.387748188 |
| 13184 | 3.0146812 | 7.7748428 | DTD2         | 0.387748188 |
| 13185 | 0.4423053 | 1.1407024 | DPY19L2P1    | 0.387748188 |
| 13186 | 1.9515277 | 5.0329769 | ADAL         | 0.387748188 |
| 13187 | 3.071949  | 7.9225359 | ARHGAP19     | 0.387748188 |
| 13188 | 4.8294828 | 12.455204 | MTERFD1      | 0.387748188 |
| 13189 | 1.5380037 | 3.9665013 | ARHGEF3      | 0.387748188 |
| 13190 | 1.8017248 | 4.6466362 | MMP17        | 0.387748188 |
| 13191 | 10.061463 | 25.948446 | ZCCHC9       | 0.387748188 |
| 13192 | 0.2279251 | 0.5878173 | ZNF19        | 0.387748188 |
| 13193 | 0.3536191 | 0.9119812 | CCDC113      | 0.387748188 |
| 13194 | 0.1085414 | 0.2799276 | MYLK4        | 0.387748188 |
| 13195 | 9.2116886 | 23.776167 | GATA2        | 0.387433713 |
| 13196 | 3.0674793 | 7.9245549 | LRBA         | 0.387085371 |
| 13197 | 13.239258 | 34.20962  | PAK2         | 0.38700395  |
| 13198 | 18.011912 | 46.561134 | NRGN         | 0.386844346 |
| 13199 | 7.3393136 | 18.997629 | CACUL1       | 0.386327865 |

|       |           |           |          |             |
|-------|-----------|-----------|----------|-------------|
| 13200 | 2.7764824 | 7.1868551 | GLIS3    | 0.386327865 |
| 13201 | 20.246263 | 52.411274 | CMTM7    | 0.386295948 |
| 13202 | 38.547884 | 99.803077 | MT1E     | 0.38623944  |
| 13203 | 7.8891727 | 20.429315 | ZNF217   | 0.386169225 |
| 13204 | 3.0582736 | 7.9224783 | C14orf79 | 0.386024863 |
| 13205 | 32.796254 | 84.991911 | CCNK     | 0.385875009 |
| 13206 | 11.754061 | 30.465213 | MARK3    | 0.385819093 |
| 13207 | 7.0943665 | 18.392418 | ZFP106   | 0.385722335 |
| 13208 | 2.9325678 | 7.603302  | MIOS     | 0.385696611 |
| 13209 | 33.669896 | 87.318388 | ZFP36L1  | 0.385599148 |
| 13210 | 6.7758759 | 17.581493 | MLKL     | 0.385398199 |
| 13211 | 2.8661974 | 7.4392881 | NFIB     | 0.385278454 |
| 13212 | 17.686256 | 45.956206 | ACTL6A   | 0.38485022  |
| 13213 | 0.7286696 | 1.8939155 | RANBP17  | 0.384742388 |
| 13214 | 1.8182507 | 4.7343454 | LNPEP    | 0.384055348 |
| 13215 | 4.1311276 | 10.756594 | CWC22    | 0.384055348 |
| 13216 | 0.01      | 0.0260431 | PLCXD3   | 0.383978306 |
| 13217 | 6.0458632 | 15.74635  | ARNTL2   | 0.383953301 |
| 13218 | 4.3434481 | 11.312632 | PNMA2    | 0.383946735 |
| 13219 | 5.2175492 | 13.602286 | ZBED5    | 0.383578853 |
| 13220 | 20.25557  | 52.819729 | B4GALT5  | 0.383484934 |
| 13221 | 1.3984361 | 3.6484941 | CUL5     | 0.383291313 |
| 13222 | 0.3802911 | 0.9930277 | C5       | 0.382961174 |
| 13223 | 4.2865543 | 11.202003 | SRD5A1   | 0.382659629 |
| 13224 | 1.182902  | 3.0955596 | FAM169A  | 0.382128649 |
| 13225 | 30.021537 | 78.635114 | COA4     | 0.381782831 |
| 13226 | 26.625555 | 69.74982  | IPO5     | 0.381729373 |
| 13227 | 9.1248369 | 23.912456 | MZT2A    | 0.381593455 |
| 13228 | 12.434092 | 32.597482 | ZGPAT    | 0.38144334  |
| 13229 | 4.8302928 | 12.666464 | SMCHD1   | 0.381345007 |
| 13230 | 5.3153786 | 13.944677 | RAB15    | 0.381176185 |
| 13231 | 9.9369298 | 26.072194 | SIN3A    | 0.381131325 |
| 13232 | 8.64472   | 22.692795 | YDJC     | 0.380945588 |
| 13233 | 1.6131181 | 4.2345106 | NXT2     | 0.380945588 |
| 13234 | 7.4210824 | 19.495992 | TDP1     | 0.380646573 |
| 13235 | 2.6172008 | 6.8756716 | EFNA5    | 0.380646573 |
| 13236 | 14.667168 | 38.54253  | RBM8A    | 0.380545015 |
| 13237 | 59.240467 | 155.67951 | GLRX5    | 0.380528342 |
| 13238 | 3.3843106 | 8.8985855 | AKAP10   | 0.380320062 |
| 13239 | 2.7477478 | 7.2248301 | EED      | 0.380320062 |
| 13240 | 1.2374043 | 3.2577419 | FUT4     | 0.37983496  |
| 13241 | 12.975473 | 34.170638 | AMD1     | 0.379725812 |
| 13242 | 31.156877 | 82.073004 | SSB      | 0.37962394  |

|       |           |           |           |             |
|-------|-----------|-----------|-----------|-------------|
| 13243 | 1.9358057 | 5.1000256 | KLHL26    | 0.379567847 |
| 13244 | 0.01      | 0.0263461 | FLJ16779  | 0.379562474 |
| 13245 | 3.3639952 | 8.8655026 | GPATCH2L  | 0.379447768 |
| 13246 | 4.3541067 | 11.476916 | DSN1      | 0.379379522 |
| 13247 | 14.390424 | 37.95628  | RGS19     | 0.379131562 |
| 13248 | 11.765151 | 31.031844 | FRMD6     | 0.379131562 |
| 13249 | 15.623274 | 41.240984 | FAM101B   | 0.378828845 |
| 13250 | 1.2192887 | 3.2189014 | SAMD5     | 0.378790309 |
| 13251 | 12.098417 | 31.970795 | WDR54     | 0.378420912 |
| 13252 | 33.5732   | 88.776085 | DUSP5     | 0.378178429 |
| 13253 | 8.1163608 | 21.470733 | NDUFB6    | 0.378019739 |
| 13254 | 41.47757  | 109.72436 | CAPRIN1   | 0.378016067 |
| 13255 | 3.4537753 | 9.1383483 | ZNF503    | 0.377943062 |
| 13256 | 0.9425352 | 2.4947603 | ZNF619    | 0.377805927 |
| 13257 | 17.979565 | 47.602656 | ABR       | 0.377700877 |
| 13258 | 855.89589 | 2266.7912 | RPL4      | 0.37758038  |
| 13259 | 24.341606 | 64.508463 | HJURP     | 0.377339725 |
| 13260 | 11.73036  | 31.090209 | TARS2     | 0.377300777 |
| 13261 | 59.131618 | 156.74946 | NOP56     | 0.377236496 |
| 13262 | 1.8573931 | 4.9270673 | FBXW7     | 0.376977405 |
| 13263 | 25.662956 | 68.075582 | EIF3J     | 0.376977405 |
| 13264 | 10.672228 | 28.313344 | DIDO1     | 0.376932787 |
| 13265 | 3.3160263 | 8.7987024 | FASTKD3   | 0.376876744 |
| 13266 | 5.2283185 | 13.874336 | LARP4     | 0.376833795 |
| 13267 | 5.94732   | 15.79127  | SASH1     | 0.376620757 |
| 13268 | 10.920052 | 29.018152 | HOXB4     | 0.376317969 |
| 13269 | 166.37098 | 442.18149 | NONO      | 0.37625043  |
| 13270 | 5.7357661 | 15.247656 | SNX27     | 0.376173615 |
| 13271 | 0.2545337 | 0.6769546 | HAS2      | 0.375998244 |
| 13272 | 0.1809023 | 0.4811255 | MAP7      | 0.375998243 |
| 13273 | 0.2917739 | 0.775998  | HTR1D     | 0.375998243 |
| 13274 | 0.574499  | 1.5279299 | HSD17B2   | 0.375998243 |
| 13275 | 0.3119753 | 0.8297254 | HEY2      | 0.375998243 |
| 13276 | 0.1949025 | 0.5183601 | KLLN      | 0.375998243 |
| 13277 | 0.2844074 | 0.7564061 | C9orf172  | 0.375998243 |
| 13278 | 1.2707287 | 3.3796133 | TTLL11    | 0.375998243 |
| 13279 | 5.2427547 | 13.943562 | UMPS      | 0.375998243 |
| 13280 | 2.2481068 | 5.9790354 | RSC1A1    | 0.375998243 |
| 13281 | 1.432299  | 3.8093236 | HIST2H2BC | 0.375998243 |
| 13282 | 1.1453144 | 3.0460632 | ZSCAN12   | 0.375998243 |
| 13283 | 0.5596495 | 1.4884366 | ZNF33B    | 0.375998243 |
| 13284 | 4.3443446 | 11.564562 | DHX57     | 0.375660115 |
| 13285 | 7.0001758 | 18.635775 | SVIL      | 0.375631057 |

|       |           |           |           |             |
|-------|-----------|-----------|-----------|-------------|
| 13286 | 3.167529  | 8.4387685 | NUFIP1    | 0.37535441  |
| 13287 | 12.472788 | 33.23529  | CYP51A1   | 0.375287471 |
| 13288 | 5.9542714 | 15.866104 | SUSD5     | 0.37528251  |
| 13289 | 11.602189 | 30.950092 | DDX18     | 0.374867664 |
| 13290 | 0.6850954 | 1.8299585 | USP45     | 0.374377561 |
| 13291 | 4.9150826 | 13.131508 | ELOVL6    | 0.374296894 |
| 13292 | 9.3032871 | 24.863528 | PSME4     | 0.374174051 |
| 13293 | 28.722249 | 76.78389  | AURKA     | 0.374066084 |
| 13294 | 17.392202 | 46.503431 | CNRIP1    | 0.373998252 |
| 13295 | 0.8413383 | 2.2511736 | CNTRL     | 0.373733193 |
| 13296 | 43.340342 | 116.01589 | VOPPI     | 0.373572448 |
| 13297 | 42.20108  | 112.99001 | DEK       | 0.373493918 |
| 13298 | 62.691608 | 167.86426 | MRFAP1    | 0.373466094 |
| 13299 | 1.2176151 | 3.2609989 | LOC285074 | 0.373387144 |
| 13300 | 2.7701365 | 7.4189392 | FRG1B     | 0.373387144 |
| 13301 | 3.7227581 | 9.9795301 | CEP250    | 0.373039419 |
| 13302 | 17.251614 | 46.249225 | OGFOD1    | 0.37301413  |
| 13303 | 2.6532344 | 7.1148256 | HOXA4     | 0.37291629  |
| 13304 | 1.2090008 | 3.2427253 | ALMS1     | 0.372834796 |
| 13305 | 13.180823 | 35.37136  | FAHD1     | 0.372641116 |
| 13306 | 23.808174 | 63.898058 | RAB31     | 0.372596213 |
| 13307 | 45.198333 | 121.36496 | TRAP1     | 0.372416664 |
| 13308 | 42.215581 | 113.3573  | FASN      | 0.372411677 |
| 13309 | 1.1865851 | 3.1877032 | ZNF480    | 0.372238261 |
| 13310 | 3.3500753 | 8.9998146 | ZBTB38    | 0.372238261 |
| 13311 | 4.8534674 | 13.038604 | EXO1      | 0.372238261 |
| 13312 | 7.6906223 | 20.667516 | SLC7A6    | 0.372111584 |
| 13313 | 4.3882294 | 11.797662 | DNAJC13   | 0.371957538 |
| 13314 | 2.2808341 | 6.1340649 | EDEM3     | 0.371830775 |
| 13315 | 3.8282342 | 10.297221 | PUS7      | 0.371773544 |
| 13316 | 0.6320609 | 1.7028523 | HTATSF1P2 | 0.371177753 |
| 13317 | 2.6427473 | 7.1198968 | LOC645166 | 0.371177753 |
| 13318 | 1.2690705 | 3.419037  | C7orf13   | 0.371177753 |
| 13319 | 7.003773  | 18.879348 | GSG2      | 0.370975366 |
| 13320 | 9.991218  | 26.933914 | FANCG     | 0.370953069 |
| 13321 | 23.306561 | 62.831086 | SNW1      | 0.370939971 |
| 13322 | 7.8149813 | 21.070911 | PP7080    | 0.370889571 |
| 13323 | 5.9937909 | 16.163959 | KLHDC2    | 0.37081206  |
| 13324 | 261.74877 | 706.02163 | FOSL1     | 0.370737614 |
| 13325 | 14.879408 | 40.156753 | GNAI3     | 0.370533152 |
| 13326 | 4.2697207 | 11.526253 | URB2      | 0.370434406 |
| 13327 | 2.059538  | 5.560513  | KIF15     | 0.370386329 |
| 13328 | 7.4868977 | 20.24118  | RFC1      | 0.36988445  |

|       |           |           |           |             |
|-------|-----------|-----------|-----------|-------------|
| 13329 | 2.6461714 | 7.1552358 | FAM155A   | 0.369823089 |
| 13330 | 8.7413302 | 23.641099 | MAN1A2    | 0.369751437 |
| 13331 | 0.9278695 | 2.5126179 | PARP11    | 0.369283989 |
| 13332 | 33.553997 | 90.862313 | DLST      | 0.369283989 |
| 13333 | 2.6875396 | 7.2777041 | LOC652276 | 0.369283989 |
| 13334 | 5.181203  | 14.030403 | HSPA14    | 0.369283989 |
| 13335 | 0.1013912 | 0.2745616 | WDR52     | 0.369283987 |
| 13336 | 0.0757541 | 0.2053119 | MSH5      | 0.368970768 |
| 13337 | 20.05164  | 54.3908   | ARF6      | 0.368658672 |
| 13338 | 2.3595268 | 6.4041865 | ATG4C     | 0.36843506  |
| 13339 | 2.7206201 | 7.3860783 | MAST4     | 0.368344335 |
| 13340 | 5.067025  | 13.756218 | SMARCA2   | 0.368344335 |
| 13341 | 0.7491203 | 2.0341481 | RIMS3     | 0.368272252 |
| 13342 | 5.5149828 | 14.977359 | PRPF4B    | 0.368221301 |
| 13343 | 15.823548 | 42.979509 | RFWD3     | 0.368164946 |
| 13344 | 3.3761925 | 9.1736339 | SMARCAD1  | 0.368032179 |
| 13345 | 2.3561737 | 6.4039569 | NOL8      | 0.367924661 |
| 13346 | 57.167673 | 155.42738 | AHSA1     | 0.367809534 |
| 13347 | 28.850809 | 78.466274 | CNIH      | 0.367684203 |
| 13348 | 3.7353159 | 10.160179 | DEPDC1    | 0.367642727 |
| 13349 | 12.493179 | 33.999408 | EPRS      | 0.367452828 |
| 13350 | 1.1888414 | 3.2363483 | PPFIA3    | 0.367340389 |
| 13351 | 19.48563  | 53.06001  | KIAA0101  | 0.367237579 |
| 13352 | 10.179177 | 27.734    | PARP2     | 0.367028819 |
| 13353 | 0.2198307 | 0.5989535 | NEIL1     | 0.367024656 |
| 13354 | 32.019715 | 87.258671 | MRPS18B   | 0.366951669 |
| 13355 | 28.457915 | 77.556402 | MTA1      | 0.366931861 |
| 13356 | 2.3296692 | 6.3495765 | BRCC3     | 0.366901511 |
| 13357 | 2.7301245 | 7.4410281 | NARS2     | 0.366901511 |
| 13358 | 61.18938  | 166.91886 | CNBP      | 0.366581591 |
| 13359 | 3.4425876 | 9.3936755 | PAAF1     | 0.3664793   |
| 13360 | 1.0459969 | 2.8563025 | ZNF200    | 0.366206622 |
| 13361 | 16.391407 | 44.784246 | XPO5      | 0.366008332 |
| 13362 | 58.453518 | 159.76354 | IFITM2    | 0.365875213 |
| 13363 | 2.8900586 | 7.9023425 | DCAF10    | 0.365721764 |
| 13364 | 2.7522229 | 7.5272769 | PDP2      | 0.365633272 |
| 13365 | 0.7478707 | 2.0458563 | TRIM66    | 0.365553848 |
| 13366 | 7.6664439 | 20.976546 | YEATS2    | 0.365476937 |
| 13367 | 2.2593845 | 6.1849486 | CHM       | 0.365303682 |
| 13368 | 8.1602214 | 22.340243 | QDPR      | 0.365270032 |
| 13369 | 0.3415452 | 0.9358955 | SNX22     | 0.364939472 |
| 13370 | 6.5229378 | 17.874027 | RPE       | 0.364939471 |
| 13371 | 2.8504491 | 7.8107448 | SDCCAG8   | 0.364939471 |

|       |           |           |              |             |
|-------|-----------|-----------|--------------|-------------|
| 13372 | 0.1984757 | 0.5438593 | PAIP2B       | 0.36493947  |
| 13373 | 2.8469877 | 7.8096036 | NRDE2        | 0.364549579 |
| 13374 | 39.228141 | 107.61378 | PHF5A        | 0.36452711  |
| 13375 | 2.4252175 | 6.6546245 | ZBTB14       | 0.36444092  |
| 13376 | 14.064985 | 38.604459 | CDK5RAP1     | 0.364335767 |
| 13377 | 5.51663   | 15.1544   | RNF2         | 0.364028262 |
| 13378 | 17.219865 | 47.311701 | CINP         | 0.363966299 |
| 13379 | 1.440899  | 3.9605472 | NEU3         | 0.363813115 |
| 13380 | 2.1759977 | 5.9810865 | KIAA1468     | 0.363813115 |
| 13381 | 2.0284787 | 5.5756064 | TGDS         | 0.363813115 |
| 13382 | 0.723345  | 1.9882323 | ZNF260       | 0.363813115 |
| 13383 | 139.44784 | 383.35702 | ATP1A1       | 0.363754493 |
| 13384 | 18.268787 | 50.241545 | CYCS         | 0.36361914  |
| 13385 | 1.120804  | 3.0824965 | FAM135A      | 0.363602697 |
| 13386 | 4.475907  | 12.310843 | NIPA1        | 0.363574361 |
| 13387 | 1.5444429 | 4.2482174 | LCOR         | 0.363550813 |
| 13388 | 2.1057727 | 5.7963065 | SLC5A3       | 0.3632956   |
| 13389 | 4.7286068 | 13.019035 | KIAA1430     | 0.363207164 |
| 13390 | 6.4328326 | 17.724942 | RGP1         | 0.362925457 |
| 13391 | 282.26072 | 777.93702 | C17orf76-AS1 | 0.362832352 |
| 13392 | 5.7676314 | 15.90194  | TMEM2        | 0.362699856 |
| 13393 | 1.5712892 | 4.3337571 | TRIM45       | 0.362569734 |
| 13394 | 1.7294564 | 4.7738684 | LOC646762    | 0.362275679 |
| 13395 | 3.016033  | 8.3252427 | RIF1         | 0.362275679 |
| 13396 | 4.2554195 | 11.747916 | UPF2         | 0.362227607 |
| 13397 | 3.6654513 | 10.121062 | DBF4         | 0.362160744 |
| 13398 | 18.590054 | 51.34305  | MYBBP1A      | 0.362075363 |
| 13399 | 2.3499687 | 6.4909908 | FRYL         | 0.362035444 |
| 13400 | 0.9910302 | 2.7384218 | RGS17        | 0.361898309 |
| 13401 | 0.9729634 | 2.6884995 | IPW          | 0.361898309 |
| 13402 | 2.6752182 | 7.3921822 | ASPM         | 0.361898309 |
| 13403 | 2.2803876 | 6.3011833 | BAG4         | 0.361898309 |
| 13404 | 0.01      | 0.0276472 | UNC5D        | 0.361700712 |
| 13405 | 10.446762 | 28.885071 | FAM98B       | 0.361666472 |
| 13406 | 1.8465311 | 5.1074503 | PAN3         | 0.361536772 |
| 13407 | 0.01      | 0.0276699 | TLL1         | 0.361403011 |
| 13408 | 7.5495318 | 20.896115 | AMOTL1       | 0.361288773 |
| 13409 | 4.1976631 | 11.619011 | USP3         | 0.36127542  |
| 13410 | 3.5039849 | 9.7003903 | PAQR8        | 0.36122102  |
| 13411 | 7.0634759 | 19.555095 | SAPCD2       | 0.361208979 |
| 13412 | 9.7748358 | 27.07472  | PRMT6        | 0.361031833 |
| 13413 | 16.206893 | 44.892526 | MRPL17       | 0.361015391 |
| 13414 | 12.149682 | 33.681004 | PPP2R5C      | 0.360728008 |



|       |           |           |          |             |
|-------|-----------|-----------|----------|-------------|
| 13415 | 4.4637828 | 12.378939 | KDM1B    | 0.360594954 |
| 13416 | 8.2783912 | 22.974366 | TATDN1   | 0.36033165  |
| 13417 | 6.4952099 | 18.043077 | COX10    | 0.359983503 |
| 13418 | 4.8387394 | 13.447281 | CBL      | 0.359830319 |
| 13419 | 46.233166 | 128.49381 | RUVBL1   | 0.359808512 |
| 13420 | 5.0412831 | 14.012374 | C5orf51  | 0.359773661 |
| 13421 | 7.2510135 | 20.154785 | ZNF146   | 0.35976636  |
| 13422 | 2.1050455 | 5.8530309 | CAMKMT   | 0.359650493 |
| 13423 | 0.2367167 | 0.6581855 | KIAA1377 | 0.359650493 |
| 13424 | 5.9151818 | 16.461622 | FUT8     | 0.359331654 |
| 13425 | 2.5849214 | 7.1967846 | PPARGC1B | 0.359177269 |
| 13426 | 12.534356 | 34.89741  | CHCHD4   | 0.359177269 |
| 13427 | 0.9237318 | 2.5717993 | SHROOM2  | 0.359177269 |
| 13428 | 22.897112 | 63.751401 | CBX3     | 0.359162501 |
| 13429 | 63.59469  | 177.10031 | ATIC     | 0.35908854  |
| 13430 | 3.7879025 | 10.550995 | SMG1     | 0.359009024 |
| 13431 | 6.7796876 | 18.887465 | TMX1     | 0.358951691 |
| 13432 | 4.7792952 | 13.329031 | IFT46    | 0.358562841 |
| 13433 | 0.6151666 | 1.7161772 | ZNF714   | 0.358451659 |
| 13434 | 1.2175239 | 3.4016514 | FDXACB1  | 0.357921404 |
| 13435 | 16.818205 | 47.027831 | ECSIT    | 0.357622389 |
| 13436 | 4.9618929 | 13.879485 | C4orf32  | 0.357498329 |
| 13437 | 1.360337  | 3.8073028 | ARHGAP32 | 0.35729676  |
| 13438 | 1.0185852 | 2.8523696 | KIAA2018 | 0.357101424 |
| 13439 | 5.0021077 | 14.01034  | GOLPH3L  | 0.357029722 |
| 13440 | 22.100431 | 61.927201 | PRPF3    | 0.356877598 |
| 13441 | 6.3832774 | 17.888862 | KIAA0391 | 0.356829705 |
| 13442 | 16.824914 | 47.151102 | ELK3     | 0.356829705 |
| 13443 | 5.1033976 | 14.307023 | MSH2     | 0.356705757 |
| 13444 | 1.2761758 | 3.579233  | NT5M     | 0.356550058 |
| 13445 | 3.9712179 | 11.141357 | NAA25    | 0.356439328 |
| 13446 | 8.8680638 | 24.890507 | LEO1     | 0.356282979 |
| 13447 | 2.639046  | 7.4098473 | ZDHHC13  | 0.356153891 |
| 13448 | 3.9931189 | 11.219297 | SMC2     | 0.355915251 |
| 13449 | 1.7039205 | 4.7886031 | VGLL3    | 0.355828297 |
| 13450 | 1.4231293 | 3.9999893 | ZNF696   | 0.355783284 |
| 13451 | 4.4515716 | 12.517014 | ABCB7    | 0.35564165  |
| 13452 | 9.7631793 | 27.46819  | PDCD2L   | 0.355435839 |
| 13453 | 2.8388786 | 7.9870354 | SGK196   | 0.355435839 |
| 13454 | 5.7619632 | 16.224429 | PIGO     | 0.355141198 |
| 13455 | 0.01      | 0.0281623 | CCDC168  | 0.35508524  |
| 13456 | 80.113155 | 225.64873 | AHCY     | 0.355034821 |
| 13457 | 1.8336605 | 5.1659165 | KBTBD6   | 0.354953565 |

|       |           |           |          |             |
|-------|-----------|-----------|----------|-------------|
| 13458 | 16.805035 | 47.355082 | PNPLA2   | 0.354872906 |
| 13459 | 13.907787 | 39.195697 | NAE1     | 0.354829441 |
| 13460 | 1.481513  | 4.1790134 | SLC45A4  | 0.354512629 |
| 13461 | 4.7679139 | 13.452938 | ARFGEF2  | 0.354414317 |
| 13462 | 1.5455317 | 4.3645781 | ALG6     | 0.354107934 |
| 13463 | 2.5801843 | 7.2941126 | BMP2     | 0.353735189 |
| 13464 | 3.5949731 | 10.166946 | PTER     | 0.353594203 |
| 13465 | 11.755187 | 33.248102 | EIF5B    | 0.353559638 |
| 13466 | 15.858185 | 44.900522 | NET1     | 0.353184866 |
| 13467 | 4.865358  | 13.780092 | NUPL2    | 0.353071521 |
| 13468 | 71.066496 | 201.28995 | APEX1    | 0.353055365 |
| 13469 | 2.8312818 | 8.0209792 | BRCA1    | 0.352984558 |
| 13470 | 3.1984916 | 9.0737776 | ADCK3    | 0.352498353 |
| 13471 | 9.072158  | 25.755607 | ZC3H13   | 0.352240112 |
| 13472 | 1.710822  | 4.8603124 | NADKD1   | 0.351998355 |
| 13473 | 72.831032 | 207.10093 | XRCC5    | 0.351669257 |
| 13474 | 1.4666631 | 4.1724328 | SYNE2    | 0.351512706 |
| 13475 | 1.6127218 | 4.5924488 | AADAT    | 0.35116817  |
| 13476 | 5.6296525 | 16.036715 | MRRF     | 0.351047742 |
| 13477 | 2.9669633 | 8.4552153 | RNF38    | 0.350903338 |
| 13478 | 0.9353658 | 2.6686093 | MMP15    | 0.350506837 |
| 13479 | 1.5565108 | 4.449106  | SSX2IP   | 0.349847989 |
| 13480 | 5.0705966 | 14.496753 | CENPF    | 0.349774646 |
| 13481 | 2.2787952 | 6.5168322 | DIEXF    | 0.349678366 |
| 13482 | 100.6874  | 288.10522 | ERH      | 0.349481337 |
| 13483 | 327.19532 | 936.37404 | RPS25    | 0.349428015 |
| 13484 | 6.9363166 | 19.862469 | TOPBP1   | 0.349217236 |
| 13485 | 3.2667124 | 9.3564214 | PPP1R13B | 0.349141226 |
| 13486 | 33.096605 | 94.852943 | MRPS2    | 0.34892544  |
| 13487 | 1.7844606 | 5.1157405 | ATHL1    | 0.348817647 |
| 13488 | 2.0550048 | 5.891344  | ANKRD12  | 0.348817647 |
| 13489 | 1.4412137 | 4.1350296 | ZNF197   | 0.348537697 |
| 13490 | 1.7907583 | 5.1415267 | PIK3CA   | 0.348293109 |
| 13491 | 2.0587024 | 5.916166  | MAML3    | 0.347979143 |
| 13492 | 85.940083 | 247.18037 | UBAP2L   | 0.347681665 |
| 13493 | 17.077768 | 49.140063 | KTN1     | 0.347532486 |
| 13494 | 3.9677149 | 11.420436 | KLHL9    | 0.347422377 |
| 13495 | 2.0135217 | 5.7977093 | ROBO3    | 0.347296087 |
| 13496 | 3.927763  | 11.322362 | ANKH     | 0.346903141 |
| 13497 | 82.069623 | 237.24764 | C1QBP    | 0.345923877 |
| 13498 | 60.935526 | 176.3249  | DANCR    | 0.34558662  |
| 13499 | 5.6638929 | 16.407438 | LPHN1    | 0.345202755 |
| 13500 | 17.239576 | 49.961636 | CAD      | 0.345056277 |

|       |           |           |              |             |
|-------|-----------|-----------|--------------|-------------|
| 13501 | 0.0531903 | 0.1543245 | RIMS1        | 0.344665059 |
| 13502 | 0.067269  | 0.1951722 | CCDC30       | 0.344665059 |
| 13503 | 0.0218815 | 0.0634863 | FAT3         | 0.344665059 |
| 13504 | 0.0733801 | 0.2129027 | GPAT2        | 0.344665058 |
| 13505 | 0.082649  | 0.2397952 | CECR6        | 0.344665058 |
| 13506 | 0.0499879 | 0.1450332 | RND2         | 0.344665058 |
| 13507 | 0.0887562 | 0.2575143 | MST1         | 0.344665058 |
| 13508 | 0.0769002 | 0.2231157 | AKR1D1       | 0.344665058 |
| 13509 | 0.0880065 | 0.2553393 | FLJ13197     | 0.344665058 |
| 13510 | 0.0285518 | 0.0828392 | RGPD8        | 0.344665058 |
| 13511 | 0.0999518 | 0.2899969 | TRIM17       | 0.344665058 |
| 13512 | 0.0993325 | 0.2882    | C11orf35     | 0.344665058 |
| 13513 | 0.0395896 | 0.1148639 | LINC00176    | 0.344665058 |
| 13514 | 0.0481515 | 0.1397051 | FAM21B       | 0.344665058 |
| 13515 | 0.1234594 | 0.3582012 | KCTD14       | 0.344665058 |
| 13516 | 0.079119  | 0.2295534 | KBTBD12      | 0.344665058 |
| 13517 | 0.1068168 | 0.3099147 | TEX19        | 0.344665057 |
| 13518 | 0.089808  | 0.2605661 | PCDHGC5      | 0.344665057 |
| 13519 | 0.0853397 | 0.2476018 | MYRIP        | 0.344665057 |
| 13520 | 0.1194266 | 0.3465006 | PPP1R3G      | 0.344665057 |
| 13521 | 0.206132  | 0.5980648 | LOC100505875 | 0.344665057 |
| 13522 | 0.2749334 | 0.7976828 | ATP6AP1L     | 0.344665057 |
| 13523 | 0.2305304 | 0.6688535 | RAD21L1      | 0.344665057 |
| 13524 | 0.1240289 | 0.3598533 | COL4A6       | 0.344665057 |
| 13525 | 0.0623391 | 0.1808685 | DGKB         | 0.344665057 |
| 13526 | 0.2947659 | 0.8552242 | LEAP2        | 0.344665057 |
| 13527 | 0.1164243 | 0.3377897 | PROC         | 0.344665057 |
| 13528 | 0.1935899 | 0.5616754 | BAIAP2L2     | 0.344665057 |
| 13529 | 0.0586876 | 0.1702742 | HEATR4       | 0.344665057 |
| 13530 | 0.1763109 | 0.5115428 | GLYATL1      | 0.344665057 |
| 13531 | 0.227759  | 0.6608126 | TBX6         | 0.344665057 |
| 13532 | 0.1393977 | 0.4044438 | ZNF420       | 0.344665057 |
| 13533 | 0.4190338 | 1.2157712 | GAPDHS       | 0.344665057 |
| 13534 | 0.1655936 | 0.4804478 | ACVR2B-AS1   | 0.344665057 |
| 13535 | 0.3152791 | 0.9147406 | LOC100133985 | 0.344665057 |
| 13536 | 0.181217  | 0.525777  | TAS2R5       | 0.344665057 |
| 13537 | 0.2248107 | 0.6522584 | LARS2-AS1    | 0.344665056 |
| 13538 | 0.183936  | 0.533666  | LOC285540    | 0.344665056 |
| 13539 | 0.0875996 | 0.2541587 | EGR4         | 0.344665056 |
| 13540 | 0.1921087 | 0.5573779 | PPFIA2       | 0.344665056 |
| 13541 | 0.2346841 | 0.6809049 | GPR146       | 0.344665056 |
| 13542 | 0.6053726 | 1.7564083 | RPH3AL       | 0.344665056 |
| 13543 | 0.5289327 | 1.5346283 | LOC389641    | 0.344665056 |

|       |           |           |              |             |
|-------|-----------|-----------|--------------|-------------|
| 13544 | 0.6127144 | 1.7777098 | PIGZ         | 0.344665056 |
| 13545 | 0.2507816 | 0.7276096 | NPPA-AS1     | 0.344665056 |
| 13546 | 0.1251649 | 0.3631493 | DUSP26       | 0.344665056 |
| 13547 | 0.5937308 | 1.7226312 | C5orf54      | 0.344665056 |
| 13548 | 0.2482917 | 0.7203855 | LINC00638    | 0.344665056 |
| 13549 | 0.5223045 | 1.5153973 | BACE1-AS     | 0.344665056 |
| 13550 | 0.348203  | 1.0102649 | CTRL         | 0.344665056 |
| 13551 | 0.0805564 | 0.2337238 | CPNE4        | 0.344665056 |
| 13552 | 0.1920733 | 0.5572752 | MOG          | 0.344665056 |
| 13553 | 0.084304  | 0.2445969 | DUSP5P1      | 0.344665056 |
| 13554 | 0.6868157 | 1.9927047 | TUBA8        | 0.344665056 |
| 13555 | 0.516693  | 1.4991162 | LOC100134259 | 0.344665056 |
| 13556 | 0.6047138 | 1.754497  | ZNF138       | 0.344665056 |
| 13557 | 0.5874545 | 1.7044215 | ARHGAP40     | 0.344665056 |
| 13558 | 0.338861  | 0.9831602 | SLC7A5P1     | 0.344665056 |
| 13559 | 0.677722  | 1.9663205 | UCN          | 0.344665056 |
| 13560 | 0.0785228 | 0.2278235 | AQP6         | 0.344665056 |
| 13561 | 0.0391214 | 0.1135055 | AATK         | 0.344665056 |
| 13562 | 0.8746259 | 2.5376112 | RCOR2        | 0.344665056 |
| 13563 | 0.1930519 | 0.5601144 | LOC100272217 | 0.344665056 |
| 13564 | 0.3847375 | 1.116265  | LOC100271722 | 0.344665056 |
| 13565 | 0.1340621 | 0.3889634 | BCDIN3D-AS1  | 0.344665056 |
| 13566 | 0.8982737 | 2.6062222 | APOC1        | 0.344665056 |
| 13567 | 1.2554187 | 3.642431  | MRGPRX3      | 0.344665056 |
| 13568 | 0.3937638 | 1.1424536 | LINC00630    | 0.344665056 |
| 13569 | 17.45134  | 50.632752 | CMSS1        | 0.344665056 |
| 13570 | 0.2731317 | 0.7924555 | TMEM253      | 0.344665056 |
| 13571 | 0.1638361 | 0.4753487 | SCLY         | 0.344665056 |
| 13572 | 0.0732254 | 0.2124538 | CCDC148      | 0.344665056 |
| 13573 | 2.706487  | 7.8525135 | SNORD47      | 0.344665056 |
| 13574 | 0.5602137 | 1.6253859 | MILR1        | 0.344665056 |
| 13575 | 0.3992328 | 1.158321  | ARHGAP27     | 0.344665056 |
| 13576 | 0.1656594 | 0.4806387 | CD79A        | 0.344665056 |
| 13577 | 0.1061097 | 0.3078633 | TUBA3FP      | 0.344665056 |
| 13578 | 1.0997335 | 3.1907311 | TDRD3        | 0.344665056 |
| 13579 | 13.35342  | 38.743179 | GNL2         | 0.344665056 |
| 13580 | 1.4708284 | 4.2674136 | MMS22L       | 0.344665056 |
| 13581 | 0.0571427 | 0.165792  | LOC100507391 | 0.344665056 |
| 13582 | 0.7750911 | 2.2488242 | PDE10A       | 0.344665056 |
| 13583 | 0.8465268 | 2.4560853 | SBF2-AS1     | 0.344665056 |
| 13584 | 0.2522996 | 0.732014  | EPN2-IT1     | 0.344665056 |
| 13585 | 0.0908851 | 0.263691  | GPR35        | 0.344665056 |
| 13586 | 0.1659232 | 0.4814041 | LOC388906    | 0.344665056 |

|       |           |           |                |             |
|-------|-----------|-----------|----------------|-------------|
| 13587 | 0.0601442 | 0.1745003 | FAM107A        | 0.344665056 |
| 13588 | 0.0904512 | 0.2624321 | CRYM-AS1       | 0.344665056 |
| 13589 | 0.1548288 | 0.4492151 | THAP9          | 0.344665056 |
| 13590 | 0.1243434 | 0.3607658 | AMACR          | 0.344665056 |
| 13591 | 0.0739267 | 0.2144887 | NOSTRIN        | 0.344665056 |
| 13592 | 0.0637307 | 0.1849063 | GRIN3B         | 0.344665056 |
| 13593 | 0.3392287 | 0.9842271 | ANXA9          | 0.344665056 |
| 13594 | 0.1020066 | 0.2959587 | LOC285972      | 0.344665056 |
| 13595 | 0.0945551 | 0.2743392 | LOC257358      | 0.344665056 |
| 13596 | 0.0436622 | 0.12668   | ATP1B4         | 0.344665056 |
| 13597 | 0.2710007 | 0.7862725 | LST1           | 0.344665055 |
| 13598 | 0.1564561 | 0.4539366 | FBP2           | 0.344665055 |
| 13599 | 0.0722105 | 0.2095092 | RTEL1-TNFRSF6B | 0.344665055 |
| 13600 | 0.278609  | 0.808347  | EGR2           | 0.344665055 |
| 13601 | 0.0965856 | 0.2802303 | PLCH1          | 0.344665055 |
| 13602 | 0.1376028 | 0.3992364 | ESRRB          | 0.344665055 |
| 13603 | 0.1036813 | 0.3008177 | SPAG8          | 0.344665055 |
| 13604 | 0.1115032 | 0.3235118 | AGPAT4-IT1     | 0.344665055 |
| 13605 | 0.025042  | 0.072656  | IL16           | 0.344665055 |
| 13606 | 0.0433894 | 0.1258887 | C20orf203      | 0.344665055 |
| 13607 | 0.0314044 | 0.0911157 | LINC00643      | 0.344665055 |
| 13608 | 0.1398654 | 0.405801  | ETV2           | 0.344665055 |
| 13609 | 0.0702036 | 0.2036866 | C11orf87       | 0.344665055 |
| 13610 | 0.0760305 | 0.2205923 | LOC730227      | 0.344665055 |
| 13611 | 0.1179397 | 0.3421865 | FBXO15         | 0.344665055 |
| 13612 | 0.0812157 | 0.2356366 | LOC283731      | 0.344665054 |
| 13613 | 0.0879694 | 0.2552316 | HSH2D          | 0.344665054 |
| 13614 | 0.0905691 | 0.2627742 | PDZK1          | 0.344665054 |
| 13615 | 0.0338586 | 0.0982362 | CALCRL         | 0.344665054 |
| 13616 | 0.045113  | 0.1308894 | LRRK2          | 0.344665054 |
| 13617 | 0.0834934 | 0.242245  | CHST8          | 0.344665054 |
| 13618 | 0.0520218 | 0.1509345 | MEI1           | 0.344665053 |
| 13619 | 0.06458   | 0.1873702 | LRRN2          | 0.344665053 |
| 13620 | 0.0699562 | 0.2029686 | PLIN1          | 0.344665053 |
| 13621 | 0.043653  | 0.1266534 | PCDHGA12       | 0.344665053 |
| 13622 | 0.068881  | 0.1998491 | FER1L6         | 0.344665053 |
| 13623 | 0.0441524 | 0.1281024 | BEND2          | 0.344665053 |
| 13624 | 0.0127019 | 0.0368528 | FCGBP          | 0.344665052 |
| 13625 | 0.0218288 | 0.0633334 | POM121L10P     | 0.344665051 |
| 13626 | 12.83288  | 37.285048 | FHOD1          | 0.344183007 |
| 13627 | 8.3887632 | 24.384464 | ECT2           | 0.344020822 |
| 13628 | 0.01      | 0.0290834 | MYH14          | 0.343838954 |
| 13629 | 161.99077 | 471.19565 | EIF4G2         | 0.343786649 |

|       |           |           |           |             |
|-------|-----------|-----------|-----------|-------------|
| 13630 | 7.3511582 | 21.384836 | OXCT1     | 0.34375565  |
| 13631 | 7.8408393 | 22.813693 | DDX6      | 0.343690049 |
| 13632 | 3.7608519 | 10.944982 | EYA3      | 0.343614248 |
| 13633 | 35.372156 | 102.96466 | GINS2     | 0.343536856 |
| 13634 | 3.646316  | 10.61662  | USP24     | 0.34345358  |
| 13635 | 1.4833373 | 4.3218657 | ATG2B     | 0.343216884 |
| 13636 | 40.46234  | 117.93136 | NSUN2     | 0.343100767 |
| 13637 | 6.4578283 | 18.823276 | TAF4      | 0.343076738 |
| 13638 | 7.7869706 | 22.701223 | NFE2L3    | 0.343019877 |
| 13639 | 4.0180623 | 11.715875 | NOC3L     | 0.342958793 |
| 13640 | 7.0441849 | 20.542578 | TMA16     | 0.342906561 |
| 13641 | 6.9695008 | 20.331581 | DAB2IP    | 0.342791877 |
| 13642 | 4.1520207 | 12.123759 | SPATA5L1  | 0.342469737 |
| 13643 | 6.2241984 | 18.20201  | THOC2     | 0.341951158 |
| 13644 | 8.9444648 | 26.203746 | ORC1      | 0.341342983 |
| 13645 | 2.4577253 | 7.2062222 | MINA      | 0.341055998 |
| 13646 | 9.1377433 | 26.797026 | PLAGL2    | 0.340998407 |
| 13647 | 29.353073 | 86.084363 | TACC3     | 0.340980315 |
| 13648 | 4.6778788 | 13.723048 | ACACA     | 0.340877528 |
| 13649 | 89.760986 | 263.64134 | CSDE1     | 0.340466276 |
| 13650 | 1.8186123 | 5.3416042 | XRCC2     | 0.340461824 |
| 13651 | 25.556941 | 75.065512 | SOX9      | 0.340461824 |
| 13652 | 69.157072 | 203.2935  | EIF4B     | 0.340183396 |
| 13653 | 2.0633614 | 6.0697165 | NEK3      | 0.339943617 |
| 13654 | 2.1404669 | 6.2983702 | KLHL8     | 0.339844566 |
| 13655 | 12.062764 | 35.497842 | GID8      | 0.339816826 |
| 13656 | 5.4067783 | 15.917743 | SLC37A4   | 0.33966991  |
| 13657 | 11.088637 | 32.657218 | GATAD2B   | 0.339546268 |
| 13658 | 3.5287576 | 10.39513  | RSF1      | 0.339462565 |
| 13659 | 1.3439793 | 3.9593684 | MGC27345  | 0.339442858 |
| 13660 | 1.7427418 | 5.1347273 | LEPR      | 0.339402994 |
| 13661 | 16.180085 | 47.709394 | SORD      | 0.339138357 |
| 13662 | 112.94482 | 333.07    | FSCN1     | 0.339102354 |
| 13663 | 2.5240933 | 7.4485074 | RSBN1L    | 0.338872366 |
| 13664 | 19.553436 | 57.72099  | SMC4      | 0.338757811 |
| 13665 | 8.8409097 | 26.09956  | KPNA4     | 0.338737884 |
| 13666 | 1.1591307 | 3.4220653 | CCDC69    | 0.338722555 |
| 13667 | 89.820302 | 265.19006 | TPM3      | 0.338701611 |
| 13668 | 3.1156071 | 9.2069199 | ABHD17C   | 0.338398419 |
| 13669 | 5.8549204 | 17.303452 | SETD7     | 0.33836719  |
| 13670 | 5.2913936 | 15.638567 | PTPRU     | 0.338355398 |
| 13671 | 1.0807784 | 3.1972203 | LOC344595 | 0.338036882 |
| 13672 | 5.7742935 | 17.091799 | C14orf142 | 0.337840006 |

|       |           |           |           |             |
|-------|-----------|-----------|-----------|-------------|
| 13673 | 1.6599526 | 4.9134281 | LIPG      | 0.337840006 |
| 13674 | 17.827686 | 52.776541 | NUDT21    | 0.337795649 |
| 13675 | 2.6492607 | 7.843346  | TAF1      | 0.337771755 |
| 13676 | 12.013472 | 35.577891 | DARS2     | 0.337666781 |
| 13677 | 4.6755578 | 13.848126 | QSER1     | 0.337631075 |
| 13678 | 9.0983238 | 26.95332  | SNHG7     | 0.33755856  |
| 13679 | 3.0509394 | 9.0486053 | GNG4      | 0.337172338 |
| 13680 | 5.6279886 | 16.698773 | FBXL19    | 0.337030071 |
| 13681 | 17.486809 | 51.886366 | SMARCC1   | 0.337021275 |
| 13682 | 287.38809 | 852.73096 | RAN       | 0.337020821 |
| 13683 | 10.943353 | 32.473789 | FAM210B   | 0.336990328 |
| 13684 | 1.8280658 | 5.4258192 | OTUD6B    | 0.336919774 |
| 13685 | 1.3438936 | 3.9919657 | PACRGL    | 0.33664959  |
| 13686 | 3.2629185 | 9.6923289 | RNF168    | 0.33664959  |
| 13687 | 2.4579554 | 7.3012278 | FAM86A    | 0.33664959  |
| 13688 | 2.9398519 | 8.7326763 | PHF3      | 0.33664959  |
| 13689 | 26.887081 | 79.914293 | PLIN2     | 0.336448964 |
| 13690 | 10.537453 | 31.330465 | SKA3      | 0.336332494 |
| 13691 | 1.3569715 | 4.0380235 | EHHADH    | 0.33604843  |
| 13692 | 6.4667863 | 19.265372 | OTUD7B    | 0.335668905 |
| 13693 | 0.945644  | 2.8178139 | METTL8    | 0.335594923 |
| 13694 | 4.7310642 | 14.101599 | SIX1      | 0.335498432 |
| 13695 | 0.7681919 | 2.2924874 | NFIA      | 0.335091027 |
| 13696 | 5.8171528 | 17.369965 | MMACHC    | 0.33489722  |
| 13697 | 4.5012142 | 13.449518 | WDR20     | 0.334674765 |
| 13698 | 0.7179438 | 2.1461406 | GDPD5     | 0.334527849 |
| 13699 | 1.2448518 | 3.7212201 | XYLB      | 0.334527849 |
| 13700 | 3.9388222 | 11.774273 | RASSF7    | 0.334527849 |
| 13701 | 48.429681 | 144.83702 | PRMT5     | 0.334373649 |
| 13702 | 7.9727758 | 23.845902 | RBM28     | 0.334345743 |
| 13703 | 9.9237857 | 29.69433  | TEX10     | 0.334198005 |
| 13704 | 6.2453377 | 18.68814  | HTT       | 0.334187238 |
| 13705 | 3.867098  | 11.578499 | TUBGCP5   | 0.33398959  |
| 13706 | 2.9805696 | 8.9266867 | SRSF8     | 0.333894273 |
| 13707 | 1.3098849 | 3.9240498 | OTUD3     | 0.333809464 |
| 13708 | 1.0077345 | 3.0212685 | FAM86JP   | 0.333546829 |
| 13709 | 6.2215584 | 18.665904 | HMGCR     | 0.333311384 |
| 13710 | 5.0753796 | 15.237734 | CDK17     | 0.333079676 |
| 13711 | 4.6141391 | 13.857044 | PODXL     | 0.332981495 |
| 13712 | 37.519209 | 112.73972 | SF3A3     | 0.332794938 |
| 13713 | 4.261559  | 12.812333 | NAB1      | 0.33261383  |
| 13714 | 0.5121779 | 1.541054  | LOC283788 | 0.33235559  |
| 13715 | 2.4379491 | 7.3353636 | DLX2      | 0.33235559  |

|       |           |           |              |             |
|-------|-----------|-----------|--------------|-------------|
| 13716 | 2.9329968 | 8.8344995 | MIB1         | 0.331993547 |
| 13717 | 2.4528687 | 7.3903919 | TXLNG        | 0.331899684 |
| 13718 | 3.1207413 | 9.4026641 | FASTKD2      | 0.331899684 |
| 13719 | 21.599493 | 65.101332 | SLC16A1      | 0.331782653 |
| 13720 | 19.063006 | 57.48163  | BHLHE40      | 0.33163648  |
| 13721 | 9.971268  | 30.069992 | WDR12        | 0.331601949 |
| 13722 | 6.2562997 | 18.882071 | NT5C3A       | 0.331335468 |
| 13723 | 154.19215 | 465.42795 | ILF2         | 0.331291135 |
| 13724 | 5.0662165 | 15.29486  | UBA5         | 0.331236548 |
| 13725 | 2.570689  | 7.7608856 | EPB41        | 0.331236547 |
| 13726 | 0.8437227 | 2.5499475 | PGM5P2       | 0.330878454 |
| 13727 | 1.431684  | 4.3269181 | PLK1S1       | 0.330878454 |
| 13728 | 2.9665409 | 8.9656516 | HOXB6        | 0.330878454 |
| 13729 | 3.2341909 | 9.7816675 | FIGNL1       | 0.33063799  |
| 13730 | 2.1436442 | 6.4899128 | MSH3         | 0.330304012 |
| 13731 | 2.857184  | 8.6562939 | FLJ42627     | 0.330070119 |
| 13732 | 8.0277157 | 24.326525 | SMEK1        | 0.329998458 |
| 13733 | 49.650558 | 150.47835 | IMP3         | 0.3299515   |
| 13734 | 3.1330832 | 9.5048676 | KIF20B       | 0.329629332 |
| 13735 | 7.1210068 | 21.6123   | BMS1         | 0.329488611 |
| 13736 | 28.276428 | 85.830098 | DHX9         | 0.329446529 |
| 13737 | 0.8693662 | 2.6424628 | NDUFA6-AS1   | 0.328998463 |
| 13738 | 0.6152663 | 1.8701192 | LOC283922    | 0.328998463 |
| 13739 | 1.433606  | 4.3574854 | FLT1         | 0.328998463 |
| 13740 | 0.01      | 0.0304085 | DLGAP1       | 0.32885491  |
| 13741 | 8.5671909 | 26.054477 | TUBB2B       | 0.328818387 |
| 13742 | 8.6419915 | 26.306721 | PRIM1        | 0.328508882 |
| 13743 | 8.0180705 | 24.419736 | STAC         | 0.32834387  |
| 13744 | 3.2091384 | 9.7811368 | POLR3B       | 0.328094621 |
| 13745 | 15.381868 | 46.883868 | PAFAH1B2     | 0.328084444 |
| 13746 | 7.5572038 | 23.041118 | CCDC51       | 0.327987715 |
| 13747 | 6.9384871 | 21.157392 | AQR          | 0.327946229 |
| 13748 | 4.6758882 | 14.268184 | ALKBH1       | 0.327714316 |
| 13749 | 8.0846098 | 24.671953 | KIF3B        | 0.327684221 |
| 13750 | 4.4998543 | 13.735717 | ZW10         | 0.32760243  |
| 13751 | 3.7955227 | 11.599524 | PRDM8        | 0.327213661 |
| 13752 | 11.636706 | 35.602657 | DDX46        | 0.326849367 |
| 13753 | 0.01      | 0.0305978 | EVPL         | 0.326820658 |
| 13754 | 12.023048 | 36.821241 | SCO1         | 0.32652479  |
| 13755 | 9.9705451 | 30.535339 | SCARB1       | 0.32652479  |
| 13756 | 0.424583  | 1.3003087 | LOC100507412 | 0.32652479  |
| 13757 | 4.3358751 | 13.284445 | RBPJ         | 0.326387364 |
| 13758 | 0.01      | 0.0306537 | CSMD3        | 0.326225265 |



|       |           |           |           |             |
|-------|-----------|-----------|-----------|-------------|
| 13759 | 2.065155  | 6.3421697 | SPTY2D1   | 0.325622788 |
| 13760 | 4.5131102 | 13.864438 | SNAPC5    | 0.325516998 |
| 13761 | 13.36687  | 41.082453 | TOMM70A   | 0.325366901 |
| 13762 | 1.99191   | 6.1266503 | NCR3LG1   | 0.325122192 |
| 13763 | 2.066151  | 6.3579763 | C9orf41   | 0.32496991  |
| 13764 | 18.821612 | 57.947946 | STEAP3    | 0.324802054 |
| 13765 | 1.7393803 | 5.3619928 | SH2D5     | 0.324390641 |
| 13766 | 2.4299775 | 7.4978933 | MYEF2     | 0.324088038 |
| 13767 | 14.95655  | 46.166576 | CCDC85C   | 0.323969233 |
| 13768 | 9.152286  | 28.286756 | ACSL4     | 0.323553748 |
| 13769 | 0.9427208 | 2.9152738 | BRWD1     | 0.323373007 |
| 13770 | 0.2449453 | 0.7580549 | IQCH      | 0.323123491 |
| 13771 | 0.2770533 | 0.8574224 | XKR6      | 0.323123491 |
| 13772 | 1.7124035 | 5.2995325 | ZBTB42    | 0.32312349  |
| 13773 | 3.638577  | 11.260639 | TRNT1     | 0.32312349  |
| 13774 | 0.288562  | 0.8930395 | HELB      | 0.32312349  |
| 13775 | 0.9971268 | 3.0859001 | ARHGAP11B | 0.32312349  |
| 13776 | 1.1734206 | 3.6314927 | RNF219    | 0.32312349  |
| 13777 | 5.0796756 | 15.733383 | STAG2     | 0.322859716 |
| 13778 | 1.1707837 | 3.6279537 | MYO9A     | 0.322711868 |
| 13779 | 1.1721306 | 3.6326533 | DENND4C   | 0.322665159 |
| 13780 | 4.6481732 | 14.414851 | CD2AP     | 0.322457256 |
| 13781 | 16.914663 | 52.616183 | NAA50     | 0.321472641 |
| 13782 | 6.3391483 | 19.723213 | TLL4      | 0.321405451 |
| 13783 | 0.01      | 0.0311175 | FER1L5    | 0.321362897 |
| 13784 | 8.2997124 | 25.834279 | ASUN      | 0.321267428 |
| 13785 | 13.139943 | 40.91955  | SEC11C    | 0.321116512 |
| 13786 | 1.0226802 | 3.1869616 | CCZ1      | 0.320895052 |
| 13787 | 0.9308166 | 2.9006886 | PDCD4-AS1 | 0.320895052 |
| 13788 | 0.6594921 | 2.0551644 | GAS1      | 0.320895052 |
| 13789 | 6.4705176 | 20.190206 | MOB2      | 0.320478035 |
| 13790 | 5.7238315 | 17.86504  | DDX10     | 0.320392869 |
| 13791 | 9.875648  | 30.833812 | TOP2B     | 0.320286308 |
| 13792 | 3.022786  | 9.4384197 | ATXN7L2   | 0.32026399  |
| 13793 | 4.2322027 | 13.220109 | KIAA1524  | 0.320133735 |
| 13794 | 1.4743202 | 4.6130385 | C11orf54  | 0.319598507 |
| 13795 | 4.6776688 | 14.657367 | SIKE1     | 0.319134311 |
| 13796 | 2.5176869 | 7.8938264 | ZBTB11    | 0.318943783 |
| 13797 | 0.01      | 0.0313547 | DUOX2     | 0.318931717 |
| 13798 | 8.9587431 | 28.095568 | RFC3      | 0.318866774 |
| 13799 | 9.4853113 | 29.773504 | GEMIN4    | 0.318582295 |
| 13800 | 0.2194256 | 0.6896873 | RAB9B     | 0.31815236  |
| 13801 | 0.4030938 | 1.2669836 | KREMEN2   | 0.31815236  |

|       |           |           |           |             |
|-------|-----------|-----------|-----------|-------------|
| 13802 | 0.795671  | 2.5009119 | LTK       | 0.31815236  |
| 13803 | 0.6162931 | 1.9371004 | PLXNA3    | 0.31815236  |
| 13804 | 0.5643859 | 1.7739486 | SRGAP2D   | 0.31815236  |
| 13805 | 2.5136766 | 7.9008579 | HOXA11    | 0.31815236  |
| 13806 | 7.1247692 | 22.394205 | WDR4      | 0.31815236  |
| 13807 | 0.3695027 | 1.1614016 | FLJ43681  | 0.318152359 |
| 13808 | 0.2564128 | 0.8059434 | SYBU      | 0.318152359 |
| 13809 | 7.8824934 | 24.799373 | RPRD1A    | 0.317850507 |
| 13810 | 4.5776158 | 14.422355 | THUMPD1   | 0.317397251 |
| 13811 | 566.41042 | 1788.0574 | PTMA      | 0.316774188 |
| 13812 | 9.9185085 | 31.349506 | PRPF38B   | 0.316384846 |
| 13813 | 2.4623572 | 7.7831157 | MXII      | 0.316371656 |
| 13814 | 5.1071721 | 16.143585 | ANAPC1    | 0.31635923  |
| 13815 | 5.2853031 | 16.714721 | GOLGA4    | 0.316206474 |
| 13816 | 23.693615 | 74.940923 | MRPS27    | 0.316163907 |
| 13817 | 2.9128266 | 9.2194695 | SUV39H2   | 0.315942968 |
| 13818 | 1.2472223 | 3.9476183 | ZNF597    | 0.315942968 |
| 13819 | 3.6070878 | 11.424824 | PNPT1     | 0.315723715 |
| 13820 | 6.4491446 | 20.43397  | SEMA7A    | 0.31560899  |
| 13821 | 3.3187742 | 10.525801 | RBL1      | 0.315298975 |
| 13822 | 2.5868856 | 8.2060196 | PAXBP1    | 0.315242429 |
| 13823 | 12.220673 | 38.769533 | CEPT1     | 0.315213308 |
| 13824 | 5.5759064 | 17.709738 | ZWILCH    | 0.31484974  |
| 13825 | 0.2190056 | 0.6959316 | LOC441666 | 0.314694182 |
| 13826 | 0.01      | 0.031815  | RIMBP2    | 0.314317423 |
| 13827 | 3.9363925 | 12.529749 | ZNF770    | 0.314163724 |
| 13828 | 11.368427 | 36.188142 | PDCD11    | 0.314147838 |
| 13829 | 16.945662 | 53.962238 | INTS3     | 0.314028162 |
| 13830 | 2.0863131 | 6.6510042 | TSEN2     | 0.313683927 |
| 13831 | 1.002885  | 3.2007117 | LOC143666 | 0.313331869 |
| 13832 | 0.8386298 | 2.6764905 | ZCWPW1    | 0.313331869 |
| 13833 | 0.5649214 | 1.802949  | NBPF14    | 0.313331869 |
| 13834 | 52.817712 | 168.58988 | CAPZA1    | 0.313291124 |
| 13835 | 2.0508656 | 6.5606037 | MFI2      | 0.31260319  |
| 13836 | 1.6960285 | 5.4333855 | TAF1A     | 0.312149485 |
| 13837 | 1.4822814 | 4.7486268 | ESCO1     | 0.312149485 |
| 13838 | 7.8780239 | 25.242435 | NCAPD3    | 0.312094451 |
| 13839 | 3.5902811 | 11.521529 | TMEM251   | 0.311614982 |
| 13840 | 1.747918  | 5.6092233 | CENPJ     | 0.311614982 |
| 13841 | 1.5869593 | 5.0954832 | TAF5      | 0.311444328 |
| 13842 | 2.8508163 | 9.1591417 | VEPH1     | 0.311253648 |
| 13843 | 3.1414877 | 10.099974 | LMBR1     | 0.311039197 |
| 13844 | 3.8467356 | 12.367366 | EMILIN2   | 0.311039197 |

|       |           |           |            |             |
|-------|-----------|-----------|------------|-------------|
| 13845 | 0.01      | 0.0321602 | ALK        | 0.310943533 |
| 13846 | 4.7468323 | 15.267584 | LRRC58     | 0.3109092   |
| 13847 | 14.864778 | 47.825872 | ACO1       | 0.310810382 |
| 13848 | 2.5146934 | 8.0919825 | SFMBT1     | 0.310763575 |
| 13849 | 55.399464 | 178.29545 | ANP32A     | 0.310717198 |
| 13850 | 5.5271172 | 17.788788 | HOXC4      | 0.310707908 |
| 13851 | 1.4400022 | 4.6374095 | POU2F1     | 0.310518673 |
| 13852 | 68.197937 | 219.65624 | MCL1       | 0.310475761 |
| 13853 | 0.379138  | 1.2222429 | CATSPER2P1 | 0.310198551 |
| 13854 | 0.8471524 | 2.7310006 | LY6G5C     | 0.310198551 |
| 13855 | 4.0576227 | 13.080727 | ABLIM1     | 0.310198551 |
| 13856 | 24.248846 | 78.172015 | LOC388796  | 0.310198551 |
| 13857 | 0.3017367 | 0.9727213 | ZNF485     | 0.310198551 |
| 13858 | 0.1501437 | 0.4840246 | PDZD7      | 0.31019855  |
| 13859 | 0.2599578 | 0.8380368 | LPPR3      | 0.31019855  |
| 13860 | 111.88796 | 360.85607 | EIF3F      | 0.310062558 |
| 13861 | 4.9261958 | 15.898044 | TWISTNB    | 0.309861744 |
| 13862 | 17.614013 | 56.846829 | YY1        | 0.309850404 |
| 13863 | 8.881061  | 28.675691 | MAP4K5     | 0.309706952 |
| 13864 | 14.749113 | 47.679406 | HMBS       | 0.309339275 |
| 13865 | 13.219724 | 42.738737 | MAEA       | 0.309314794 |
| 13866 | 1.607913  | 5.206033  | PPAPDC2    | 0.3088557   |
| 13867 | 3.46196   | 11.211194 | TMEM41B    | 0.308794937 |
| 13868 | 2.3544873 | 7.6255623 | NANP       | 0.308762446 |
| 13869 | 0.01      | 0.0324188 | IKZF1      | 0.308462734 |
| 13870 | 4.2968969 | 13.933569 | NUP35      | 0.308384524 |
| 13871 | 3.9529054 | 12.818106 | RNF138     | 0.308384524 |
| 13872 | 2.4253236 | 7.8646088 | ABCC4      | 0.308384524 |
| 13873 | 13.317008 | 43.231863 | GOLPH3     | 0.308036888 |
| 13874 | 1.6110398 | 5.230673  | MTFR2      | 0.307998561 |
| 13875 | 10.489549 | 34.057135 | EIF2A      | 0.307998561 |
| 13876 | 12.497873 | 40.58472  | GYG1       | 0.307945292 |
| 13877 | 19.573434 | 63.582221 | ZNF259     | 0.307844446 |
| 13878 | 16.488752 | 53.598438 | RGS10      | 0.307634926 |
| 13879 | 43.028367 | 139.89792 | BZW1       | 0.307569749 |
| 13880 | 3.4163852 | 11.113667 | RMND1      | 0.307403969 |
| 13881 | 3.9388222 | 12.813179 | STRADB     | 0.307403969 |
| 13882 | 4.9618929 | 16.151918 | ATL2       | 0.307201463 |
| 13883 | 5.7220172 | 18.665904 | MAP7D3     | 0.306549156 |
| 13884 | 28.508705 | 93.022083 | SDHA       | 0.306472442 |
| 13885 | 3.3302477 | 10.879003 | BTBD7      | 0.306116991 |
| 13886 | 8.8630574 | 28.97677  | XRCC3      | 0.305867681 |
| 13887 | 9.949495  | 32.559451 | GEMIN5     | 0.305579328 |

|       |           |           |           |             |
|-------|-----------|-----------|-----------|-------------|
| 13888 | 8.2655516 | 27.055942 | KIF2A     | 0.305498573 |
| 13889 | 4.4077074 | 14.433668 | RNF214    | 0.305376811 |
| 13890 | 5.4631117 | 17.893447 | TIMM10B   | 0.305313534 |
| 13891 | 12.457123 | 40.810693 | ATP8B2    | 0.305241635 |
| 13892 | 5.3680264 | 17.589755 | CTTNBP2NL | 0.305179156 |
| 13893 | 8.0153654 | 26.270125 | MT1X      | 0.305113328 |
| 13894 | 10.349898 | 33.938864 | SMURF2    | 0.3049571   |
| 13895 | 2.1391629 | 7.0231422 | TCAIM     | 0.304587724 |
| 13896 | 4.9071831 | 16.120815 | HLTF      | 0.304400447 |
| 13897 | 1.0440857 | 3.4331798 | TMEM102   | 0.304116226 |
| 13898 | 1.0672559 | 3.5093685 | POLQ      | 0.304116226 |
| 13899 | 1.2952113 | 4.2589352 | ZBTB25    | 0.304116226 |
| 13900 | 1.44421   | 4.7488751 | EPHX4     | 0.304116226 |
| 13901 | 0.2714242 | 0.8925015 | ANKEF1    | 0.304116226 |
| 13902 | 0.3361824 | 1.1054407 | ARHGAP20  | 0.304116226 |
| 13903 | 0.6330483 | 2.0815999 | PRICKLE4  | 0.304116226 |
| 13904 | 0.3818239 | 1.2555198 | ISL1      | 0.304116226 |
| 13905 | 4.4543405 | 14.66735  | LRR1      | 0.303690889 |
| 13906 | 13.058055 | 43.005976 | CENPV     | 0.303633502 |
| 13907 | 5.5728    | 18.358258 | MAK16     | 0.303558215 |
| 13908 | 0.01      | 0.0329596 | PCDHA11   | 0.303401897 |
| 13909 | 0.5527838 | 1.8265831 | TMC7      | 0.302632732 |
| 13910 | 2.678446  | 8.854889  | MPDZ      | 0.302482169 |
| 13911 | 18.483326 | 61.17938  | LRRFIP1   | 0.302116923 |
| 13912 | 1.8756753 | 6.2139417 | STIM2     | 0.301849521 |
| 13913 | 0.706439  | 2.3424447 | C1QL4     | 0.301581924 |
| 13914 | 1.4911388 | 4.9479425 | TRIP11    | 0.301365426 |
| 13915 | 3.1319539 | 10.394919 | RANBP2    | 0.301296605 |
| 13916 | 28.04712  | 93.239201 | CDV3      | 0.30080824  |
| 13917 | 0.7535349 | 2.5051145 | ULK4      | 0.300798595 |
| 13918 | 1.8371059 | 6.1101368 | OSBPL11   | 0.300665262 |
| 13919 | 0.5828451 | 1.9415734 | INHBB     | 0.300192146 |
| 13920 | 1.1058936 | 3.6839524 | JPX       | 0.300192146 |
| 13921 | 7.4746191 | 24.899449 | SEH1L     | 0.300192146 |
| 13922 | 0.4237676 | 1.4116546 | LINC00174 | 0.300192145 |
| 13923 | 11.796198 | 39.318128 | SLC25A22  | 0.300019323 |
| 13924 | 93.120201 | 310.5232  | SERPINE1  | 0.299881618 |
| 13925 | 0.6075787 | 2.0272305 | SEMA6A    | 0.299708745 |
| 13926 | 4.1868986 | 13.976422 | PRR7      | 0.299568694 |
| 13927 | 13.700094 | 45.736838 | ZFR       | 0.299541776 |
| 13928 | 1.5251401 | 5.0922526 | HSPA12A   | 0.299502049 |
| 13929 | 28.120764 | 93.913245 | CDCA4     | 0.299433421 |
| 13930 | 0.01      | 0.0333965 | SHISA7    | 0.29943262  |

|       |           |           |              |             |
|-------|-----------|-----------|--------------|-------------|
| 13931 | 0.8940696 | 2.9870586 | LOC100506385 | 0.299314391 |
| 13932 | 4.1646247 | 13.91388  | PLAA         | 0.299314391 |
| 13933 | 25.577135 | 85.456803 | MKI67        | 0.299298998 |
| 13934 | 8.9676118 | 29.97765  | STX1A        | 0.299143256 |
| 13935 | 4.4992182 | 15.043049 | TPR          | 0.299089512 |
| 13936 | 2.061982  | 6.8988165 | ZBTB21       | 0.298889228 |
| 13937 | 41.6799   | 139.52353 | PABPC4       | 0.298730268 |
| 13938 | 8.6833125 | 29.105512 | ARFIP2       | 0.298339108 |
| 13939 | 4.3686518 | 14.644354 | SLK          | 0.298316454 |
| 13940 | 3.0747467 | 10.308677 | MOCS3        | 0.298267837 |
| 13941 | 4.8939217 | 16.407809 | SLC43A1      | 0.298267837 |
| 13942 | 17.099155 | 57.35749  | SYNCRIP      | 0.298115465 |
| 13943 | 17.85032  | 59.979901 | ETS1         | 0.29760502  |
| 13944 | 8.5931743 | 28.883875 | GFM1         | 0.297507664 |
| 13945 | 9.6663864 | 32.496323 | TNPO1        | 0.297460929 |
| 13946 | 3.5280991 | 11.872253 | PCNX         | 0.29717184  |
| 13947 | 57.708914 | 194.20706 | SSR3         | 0.297151474 |
| 13948 | 0.1400534 | 0.4713297 | NOS1AP       | 0.297145325 |
| 13949 | 4.8060439 | 16.196828 | OTUD4        | 0.296727487 |
| 13950 | 2.275706  | 7.6697559 | PIDD         | 0.296711657 |
| 13951 | 8.6115496 | 29.024556 | TMEM48       | 0.296698757 |
| 13952 | 12.198995 | 41.141474 | DHCR7        | 0.29651332  |
| 13953 | 2.0988405 | 7.0796714 | PRRX1        | 0.296460153 |
| 13954 | 0.01      | 0.0337319 | CCDC108      | 0.296455662 |
| 13955 | 205.25493 | 692.93016 | RPS3         | 0.296213006 |
| 13956 | 9.0871875 | 30.700893 | VRK1         | 0.295990983 |
| 13957 | 5.0200101 | 16.970106 | RIN2         | 0.295814891 |
| 13958 | 24.790651 | 83.866829 | FEZ2         | 0.29559543  |
| 13959 | 0.1640941 | 0.5554468 | KIF9-AS1     | 0.295427192 |
| 13960 | 0.3646535 | 1.2343263 | LOC100507547 | 0.295427191 |
| 13961 | 0.702273  | 2.3771439 | FAM72B       | 0.295427191 |
| 13962 | 0.4967807 | 1.6815673 | ACY1         | 0.295427191 |
| 13963 | 8.0795878 | 27.348829 | RIN3         | 0.295427191 |
| 13964 | 15.2074   | 51.475967 | RBM25        | 0.295427191 |
| 13965 | 0.5082915 | 1.7205304 | SUGT1P1      | 0.295427191 |
| 13966 | 0.0774144 | 0.2620421 | PCDH10       | 0.295427191 |
| 13967 | 0.2228872 | 0.7544572 | COL17A1      | 0.295427191 |
| 13968 | 4.3972766 | 14.884468 | PRRX2        | 0.295427191 |
| 13969 | 1.794438  | 6.0740447 | ZNF354A      | 0.295427191 |
| 13970 | 0.5924648 | 2.0054512 | PRR22        | 0.295427191 |
| 13971 | 0.1445713 | 0.4893635 | PRKXP1       | 0.295427191 |
| 13972 | 0.2111444 | 0.7147087 | NRL          | 0.295427191 |
| 13973 | 0.2044134 | 0.6919249 | ENTPD3-AS1   | 0.295427191 |

|       |           |           |              |             |
|-------|-----------|-----------|--------------|-------------|
| 13974 | 0.1702958 | 0.5764392 | SCAND3       | 0.295427191 |
| 13975 | 0.2910608 | 0.9852199 | LOC100630918 | 0.295427191 |
| 13976 | 0.200577  | 0.6789389 | FOXD3        | 0.295427191 |
| 13977 | 33.355482 | 113.10161 | TMEM123      | 0.294916071 |
| 13978 | 0.01      | 0.0339249 | GRIN2B       | 0.294768713 |
| 13979 | 47.990674 | 163.02517 | OXA1L        | 0.294375849 |
| 13980 | 13.070352 | 44.417775 | VKORC1L1     | 0.294259495 |
| 13981 | 4.9935982 | 16.971966 | LOC100506710 | 0.294226268 |
| 13982 | 41.77351  | 142.02277 | MRPL3        | 0.29413249  |
| 13983 | 0.7690997 | 2.6161721 | ADAMTSL1     | 0.293979019 |
| 13984 | 13.988951 | 47.594431 | SETD3        | 0.293919909 |
| 13985 | 8.0325289 | 27.333398 | LARS2        | 0.293872311 |
| 13986 | 0.01      | 0.0340798 | PART1        | 0.293429081 |
| 13987 | 3.0179806 | 10.292459 | CITED4       | 0.29322251  |
| 13988 | 4.4645002 | 15.234215 | TCFL5        | 0.293057454 |
| 13989 | 8.296302  | 28.344029 | TRMT6        | 0.292700171 |
| 13990 | 0.9787296 | 3.3467355 | NPAT         | 0.292443078 |
| 13991 | 1.531483  | 5.2409276 | PMS1         | 0.292216026 |
| 13992 | 3.7137677 | 12.70898  | TIMM8A       | 0.292216026 |
| 13993 | 12.01932  | 41.153258 | DPAGT1       | 0.292062417 |
| 13994 | 20.207915 | 69.192411 | PAPOLA       | 0.292053924 |
| 13995 | 3.467078  | 11.871748 | ATE1         | 0.292044437 |
| 13996 | 2.002237  | 6.8581133 | FLJ31306     | 0.291951577 |
| 13997 | 5.55349   | 19.029673 | LANCL2       | 0.291833186 |
| 13998 | 3.9498875 | 13.536176 | ISYNA1       | 0.291802318 |
| 13999 | 3.6894761 | 12.650804 | PDCD4        | 0.291639663 |
| 14000 | 0.01      | 0.0343177 | RGPD3        | 0.291394828 |
| 14001 | 5.326121  | 18.280281 | FANCD2       | 0.291358808 |
| 14002 | 1.4484761 | 4.9730312 | PELI2        | 0.291266245 |
| 14003 | 23.630728 | 81.177558 | TRNP1        | 0.291099277 |
| 14004 | 24.151864 | 83.0243   | SLBP         | 0.290901148 |
| 14005 | 6.0091165 | 20.663296 | C14orf169    | 0.290811141 |
| 14006 | 1.9456385 | 6.690385  | OMA1         | 0.290811141 |
| 14007 | 0.7499382 | 2.5787809 | AMIGO1       | 0.290811141 |
| 14008 | 3.2407935 | 11.155785 | ZNF839       | 0.290503404 |
| 14009 | 4.6728981 | 16.087446 | SMU1         | 0.290468607 |
| 14010 | 1.5328001 | 5.2773635 | ZNF589       | 0.290448081 |
| 14011 | 1.5913881 | 5.480012  | AHCTF1       | 0.290398643 |
| 14012 | 0.0772422 | 0.2660112 | MARVELD3     | 0.290372008 |
| 14013 | 1.5934968 | 5.4901923 | ACBD5        | 0.290244258 |
| 14014 | 12.002268 | 41.391956 | PFAS         | 0.289966183 |
| 14015 | 4.8481828 | 16.725672 | AASDHPPT     | 0.289864754 |
| 14016 | 0.01      | 0.0345294 | EPHA3        | 0.289608653 |

|       |           |           |              |             |
|-------|-----------|-----------|--------------|-------------|
| 14017 | 0.6618859 | 2.2861598 | NIPAL1       | 0.289518647 |
| 14018 | 6.4806597 | 22.384257 | WNT5B        | 0.289518647 |
| 14019 | 0.6417934 | 2.2167603 | IQCG         | 0.289518647 |
| 14020 | 17.732687 | 61.300988 | PTPRF        | 0.289272458 |
| 14021 | 20.292064 | 70.217935 | WWTR1        | 0.288986911 |
| 14022 | 12.445631 | 43.067923 | FGFRL1       | 0.288976816 |
| 14023 | 2.2845665 | 7.9280469 | RNMT         | 0.288162588 |
| 14024 | 0.01      | 0.0347257 | ATP8B4       | 0.287971323 |
| 14025 | 5.975137  | 20.771178 | BCL9         | 0.287664807 |
| 14026 | 2.51002   | 8.7258671 | NUBPL        | 0.287652791 |
| 14027 | 7.1330079 | 24.797284 | CTR9         | 0.287652791 |
| 14028 | 11.54791  | 40.171049 | NIP7         | 0.287468484 |
| 14029 | 4.0958671 | 14.251728 | SOWAHC       | 0.287394427 |
| 14030 | 7.1663322 | 24.93822  | TRMT61A      | 0.287363422 |
| 14031 | 0.463522  | 1.6138173 | LOC100129534 | 0.28722088  |
| 14032 | 0.5019256 | 1.7475247 | SYNGR3       | 0.28722088  |
| 14033 | 21.13877  | 73.640424 | BZW2         | 0.287053891 |
| 14034 | 15.198784 | 53.011799 | RRP1B        | 0.286705686 |
| 14035 | 1.182044  | 4.1253937 | ZNF202       | 0.286528782 |
| 14036 | 0.7935711 | 2.7704171 | CRYBG3       | 0.286444607 |
| 14037 | 1.8811932 | 6.5673891 | SGOL2        | 0.286444607 |
| 14038 | 0.9406922 | 3.2891489 | CEP135       | 0.285998663 |
| 14039 | 2.928706  | 10.243263 | NIPBL        | 0.285915331 |
| 14040 | 3.1463512 | 11.008164 | MSANTD2      | 0.285819803 |
| 14041 | 5.370446  | 18.790864 | TLL5         | 0.285800912 |
| 14042 | 1.5550359 | 5.4427229 | AMER1        | 0.285709191 |
| 14043 | 0.01      | 0.0350092 | SORCS3       | 0.285639367 |
| 14044 | 0.8401288 | 2.9434233 | ATM          | 0.28542575  |
| 14045 | 0.64197   | 2.2506306 | LOC100287042 | 0.285240047 |
| 14046 | 0.01      | 0.0350945 | KLHL31       | 0.284944748 |
| 14047 | 4.0371852 | 14.173163 | TBRG1        | 0.284847154 |
| 14048 | 2.3308778 | 8.1888877 | JMJD1C       | 0.284639119 |
| 14049 | 4.74957   | 16.686287 | DBNDD1       | 0.284639119 |
| 14050 | 2.0880627 | 7.3433178 | CASC5        | 0.284348671 |
| 14051 | 2.9568601 | 10.409111 | FUZ          | 0.284064607 |
| 14052 | 1.4440098 | 5.0833853 | ZNF778       | 0.284064607 |
| 14053 | 2.4455935 | 8.6160438 | PHF6         | 0.283841811 |
| 14054 | 3.3640412 | 11.855756 | UTP15        | 0.283747511 |
| 14055 | 2.6328411 | 9.2897245 | RFX7         | 0.283414338 |
| 14056 | 1.8171595 | 6.4130262 | DTNA         | 0.283354445 |
| 14057 | 8.2417881 | 29.117889 | CDC25A       | 0.283048957 |
| 14058 | 2.2614303 | 7.9912544 | MIS18BP1     | 0.282988151 |
| 14059 | 7.0848918 | 25.06814  | ALKBH2       | 0.282625346 |

|       |           |           |              |             |
|-------|-----------|-----------|--------------|-------------|
| 14060 | 0.4255946 | 1.5092078 | C21orf88     | 0.281998683 |
| 14061 | 0.2208402 | 0.7831248 | FAM211A      | 0.281998683 |
| 14062 | 0.3069212 | 1.0883782 | LY86-AS1     | 0.281998682 |
| 14063 | 1.1664151 | 4.1362431 | DDI2         | 0.281998682 |
| 14064 | 3.634875  | 12.889688 | ARHGAP24     | 0.281998682 |
| 14065 | 15.018329 | 53.256735 | SLMO2        | 0.281998682 |
| 14066 | 0.237267  | 0.8413762 | ZFP82        | 0.281998682 |
| 14067 | 0.2221743 | 0.7878558 | RFESD        | 0.281998682 |
| 14068 | 0.1218236 | 0.4320005 | C6orf170     | 0.281998682 |
| 14069 | 34.668419 | 122.96958 | DHCR24       | 0.28192679  |
| 14070 | 11.988966 | 42.648694 | ARRB2        | 0.281109798 |
| 14071 | 1.0496827 | 3.7343818 | ZCCHC2       | 0.281086065 |
| 14072 | 2.328915  | 8.2916037 | EPT1         | 0.2808763   |
| 14073 | 1.5480436 | 5.5122259 | GDAP2        | 0.280838194 |
| 14074 | 19.165157 | 68.295832 | CXCL1        | 0.280619716 |
| 14075 | 15.006354 | 53.486589 | ABCE1        | 0.28056293  |
| 14076 | 0.7424609 | 2.6478118 | DUSP8        | 0.280405469 |
| 14077 | 0.4311943 | 1.5397575 | MIPOL1       | 0.280040358 |
| 14078 | 3.2476828 | 11.617572 | RLIM         | 0.279549182 |
| 14079 | 6.9815578 | 24.98248  | EPB41L4A-AS1 | 0.279458154 |
| 14080 | 1.2331331 | 4.412586  | LOC440288    | 0.279458154 |
| 14081 | 2.6434438 | 9.4591759 | NLN          | 0.279458154 |
| 14082 | 4.4631784 | 15.98365  | TPP2         | 0.279233989 |
| 14083 | 18.957632 | 67.941129 | GOLM1        | 0.279030275 |
| 14084 | 4.8113963 | 17.244248 | NDC80        | 0.279014569 |
| 14085 | 1.4242378 | 5.1045284 | SNTB1        | 0.279014569 |
| 14086 | 4.5003955 | 16.160026 | SLC25A36     | 0.278489365 |
| 14087 | 0.7997788 | 2.8729408 | TBX20        | 0.278383315 |
| 14088 | 0.7371382 | 2.6479252 | FAM76B       | 0.278383315 |
| 14089 | 12.960633 | 46.608505 | NRAS         | 0.278074429 |
| 14090 | 5.4730172 | 19.722154 | TRIM33       | 0.277506056 |
| 14091 | 0.1609489 | 0.5801771 | ANK2         | 0.277413337 |
| 14092 | 14.158439 | 51.079302 | BCAS2        | 0.277185452 |
| 14093 | 0.01      | 0.0361003 | VWDE         | 0.277006185 |
| 14094 | 0.9717104 | 3.5084487 | ANKLE1       | 0.276962991 |
| 14095 | 2.5694942 | 9.2861111 | MIR100HG     | 0.276702932 |
| 14096 | 5.4673468 | 19.768933 | OSBPL10      | 0.276562563 |
| 14097 | 5.5028159 | 19.919101 | POLM         | 0.276258251 |
| 14098 | 0.1833696 | 0.6650281 | CDS1         | 0.275732045 |
| 14099 | 0.5448353 | 1.9759593 | MCOLN2       | 0.275732045 |
| 14100 | 0.191017  | 0.692763  | PCDH7        | 0.275732045 |
| 14101 | 1.5542536 | 5.6368261 | ZC3H8        | 0.275732045 |
| 14102 | 1.9771076 | 7.1703948 | MEIS2        | 0.275732045 |



|       |           |           |          |             |
|-------|-----------|-----------|----------|-------------|
| 14103 | 2.4387176 | 8.8445199 | CYB5D1   | 0.275732045 |
| 14104 | 0.5825283 | 2.1126609 | APITD1   | 0.275732045 |
| 14105 | 0.145125  | 0.5263262 | CXADR    | 0.275732044 |
| 14106 | 38.024803 | 138.11872 | RPS29    | 0.275305215 |
| 14107 | 29.958011 | 108.94234 | FARSB    | 0.274989602 |
| 14108 | 30.169805 | 109.87302 | EIF3A    | 0.274587929 |
| 14109 | 1.1647436 | 4.2458489 | KLHL11   | 0.274325249 |
| 14110 | 5.7432933 | 20.94828  | TAMM41   | 0.274165386 |
| 14111 | 1.3064629 | 4.7652366 | COL27A1  | 0.274165386 |
| 14112 | 14.321542 | 52.245602 | NOP58    | 0.274119577 |
| 14113 | 2.5283531 | 9.2307325 | ARHGAP22 | 0.273906005 |
| 14114 | 85.696991 | 312.91716 | IMPDH2   | 0.273864785 |
| 14115 | 0.01      | 0.0365189 | LRP1B    | 0.273830758 |
| 14116 | 1.3454774 | 4.9158012 | ZNF711   | 0.273704603 |
| 14117 | 1.1422628 | 4.1733415 | HSPA4L   | 0.273704603 |
| 14118 | 0.01      | 0.0365454 | STRC     | 0.273632294 |
| 14119 | 4.488444  | 16.40447  | PDE12    | 0.273611029 |
| 14120 | 2.4837184 | 9.0827894 | IL27RA   | 0.273453268 |
| 14121 | 9.2081787 | 33.674425 | SLC38A1  | 0.273447241 |
| 14122 | 1.1076663 | 4.0554426 | KIF16B   | 0.273130799 |
| 14123 | 1.1299741 | 4.1371169 | MRE11A   | 0.273130799 |
| 14124 | 1.3878496 | 5.0825421 | VPS13A   | 0.273062104 |
| 14125 | 0.01      | 0.0366317 | C1orf116 | 0.272987291 |
| 14126 | 58.857265 | 215.62371 | STOML2   | 0.272962856 |
| 14127 | 4.8083489 | 17.616288 | C10orf2  | 0.272949035 |
| 14128 | 1.5461111 | 5.6663198 | LSM11    | 0.272859836 |
| 14129 | 2.6861375 | 9.8500828 | PUS3     | 0.272702022 |
| 14130 | 5.2372649 | 19.205083 | BCL2A1   | 0.272702022 |
| 14131 | 48.218509 | 176.85968 | ATP5L    | 0.272637093 |
| 14132 | 12.92029  | 47.390355 | NUP155   | 0.272635445 |
| 14133 | 24.879235 | 91.355021 | CSE1L    | 0.27233571  |
| 14134 | 0.2847766 | 1.0465726 | C11orf45 | 0.272103992 |
| 14135 | 0.4788591 | 1.7598387 | CADM4    | 0.272103992 |
| 14136 | 0.2922854 | 1.074168  | MMP25    | 0.272103992 |
| 14137 | 1.1143167 | 4.0951867 | ZBTB44   | 0.272103992 |
| 14138 | 0.3487274 | 1.2815961 | KDM4D    | 0.272103992 |
| 14139 | 0.927044  | 3.4069476 | HAUS3    | 0.272103992 |
| 14140 | 0.8274747 | 3.0410237 | SPTB     | 0.272103992 |
| 14141 | 1.6332249 | 6.0022086 | C12orf39 | 0.272103992 |
| 14142 | 1.4851732 | 5.4581087 | RMI1     | 0.272103992 |
| 14143 | 2.2554058 | 8.2887643 | MAPK8IP1 | 0.272103992 |
| 14144 | 4.8571563 | 17.859231 | DCAF16   | 0.271968953 |
| 14145 | 4.8474554 | 17.838554 | BAG5     | 0.271740378 |

|       |           |           |              |             |
|-------|-----------|-----------|--------------|-------------|
| 14146 | 0.01      | 0.0368663 | EHF          | 0.271250724 |
| 14147 | 0.9019183 | 3.3255122 | FZD4         | 0.271211847 |
| 14148 | 1.6896055 | 6.2352118 | KDM4C        | 0.270978044 |
| 14149 | 3.1752411 | 11.719356 | ESF1         | 0.27093991  |
| 14150 | 0.6467308 | 2.3914951 | GPCPD1       | 0.270429506 |
| 14151 | 4.0809302 | 15.091656 | FBN2         | 0.270409695 |
| 14152 | 4.1000464 | 15.181232 | CPVL         | 0.270073365 |
| 14153 | 21.611205 | 80.028636 | DKC1         | 0.270043398 |
| 14154 | 7.3940871 | 27.393785 | ACP6         | 0.269918418 |
| 14155 | 0.3619094 | 1.3417078 | LOC613037    | 0.26973787  |
| 14156 | 1.5688796 | 5.8163118 | LOC100268168 | 0.26973787  |
| 14157 | 2.2014032 | 8.1612685 | CAMK4        | 0.26973787  |
| 14158 | 0.276759  | 1.0260293 | KCNAB1       | 0.26973787  |
| 14159 | 0.1727784 | 0.6405417 | PLEKHG1      | 0.269737869 |
| 14160 | 3.9735801 | 14.736559 | THADA        | 0.269640982 |
| 14161 | 4.593253  | 17.070174 | SLC25A15     | 0.269080614 |
| 14162 | 0.9760254 | 3.6359022 | WRN          | 0.268441053 |
| 14163 | 2.3065327 | 8.5923247 | STYX         | 0.268441053 |
| 14164 | 16.105626 | 60.028851 | RSL1D1       | 0.268298093 |
| 14165 | 0.843235  | 3.1455444 | PSTK         | 0.268072822 |
| 14166 | 4.1354968 | 15.426766 | LOC400043    | 0.268072821 |
| 14167 | 0.168355  | 0.6280198 | RAB11FIP4    | 0.268072821 |
| 14168 | 33.829411 | 126.37325 | APRT         | 0.267694401 |
| 14169 | 0.01      | 0.0374068 | SYT13        | 0.267331059 |
| 14170 | 5.1100091 | 19.12341  | PSMG4        | 0.267212235 |
| 14171 | 1.074465  | 4.0210174 | CEP128       | 0.267212234 |
| 14172 | 694.73766 | 2601.7803 | RPS4X        | 0.267023953 |
| 14173 | 9.4365584 | 35.377261 | TTI1         | 0.266740783 |
| 14174 | 9.9724914 | 37.465643 | TSR1         | 0.266176974 |
| 14175 | 1.7263478 | 6.4893493 | UNC13B       | 0.266027883 |
| 14176 | 0.01      | 0.0376022 | PCDHA12      | 0.265941816 |
| 14177 | 1.136036  | 4.2726679 | LOC100506469 | 0.265884472 |
| 14178 | 2.8980153 | 10.899528 | CEP57        | 0.265884472 |
| 14179 | 0.6135412 | 2.3075481 | ZDHHC21      | 0.265884472 |
| 14180 | 7.2205323 | 27.210163 | SNHG15       | 0.265361592 |
| 14181 | 3.7820291 | 14.255595 | GPR3         | 0.265301392 |
| 14182 | 2.31298   | 8.7240467 | ZC3HAV1L     | 0.265126966 |
| 14183 | 18.685132 | 70.53446  | PFDN4        | 0.264907853 |
| 14184 | 0.01      | 0.0377572 | LINC00861    | 0.26485026  |
| 14185 | 11.250889 | 42.525697 | GBAS         | 0.264566839 |
| 14186 | 1.4029342 | 5.3038907 | SMN2         | 0.264510392 |
| 14187 | 1.6553472 | 6.2632623 | FXN          | 0.264294729 |
| 14188 | 1.7067699 | 6.4627364 | APAF1        | 0.264094004 |

|       |           |           |              |             |
|-------|-----------|-----------|--------------|-------------|
| 14189 | 3.0557111 | 11.572125 | APOOL        | 0.264057906 |
| 14190 | 0.1680415 | 0.6365239 | DNHD1        | 0.263998767 |
| 14191 | 1.021149  | 3.8680069 | LBX2-AS1     | 0.263998766 |
| 14192 | 2.8936646 | 10.978841 | NEK4         | 0.263567396 |
| 14193 | 4.9383768 | 18.74586  | LOC93622     | 0.263438259 |
| 14194 | 747.32365 | 2837.2334 | HSPA8        | 0.26339872  |
| 14195 | 22.269604 | 84.554374 | RAC2         | 0.263376128 |
| 14196 | 6.2688037 | 23.807193 | MED28        | 0.26331554  |
| 14197 | 4.5045358 | 17.125308 | QTRTD1       | 0.263033859 |
| 14198 | 0.4985634 | 1.8965427 | ADAT2        | 0.262880128 |
| 14199 | 5.2247746 | 19.92597  | SELRC1       | 0.262209301 |
| 14200 | 36.737477 | 140.19961 | MTHFD1       | 0.262036934 |
| 14201 | 2.1507422 | 8.2125368 | MTPAP        | 0.261885239 |
| 14202 | 4.8184856 | 18.400407 | RASSF8       | 0.261868423 |
| 14203 | 1.8353104 | 7.0111316 | DPF3         | 0.261770929 |
| 14204 | 2.0487377 | 7.833364  | GTF2H2B      | 0.261539954 |
| 14205 | 13.217456 | 50.573121 | DUSP7        | 0.26135338  |
| 14206 | 0.01      | 0.0382734 | KMO          | 0.261277911 |
| 14207 | 28.668714 | 109.75621 | GMPS         | 0.261203563 |
| 14208 | 2.2648149 | 8.6907573 | KANK1        | 0.260600408 |
| 14209 | 1.7653017 | 6.7745649 | BDP1         | 0.260577871 |
| 14210 | 1.499931  | 5.7585099 | DCLRE1A      | 0.260472065 |
| 14211 | 0.01      | 0.0383974 | LOC100129316 | 0.260434436 |
| 14212 | 79.475141 | 305.38075 | HSPD1        | 0.260249348 |
| 14213 | 0.01      | 0.0384267 | FP588        | 0.260235972 |
| 14214 | 2.8010686 | 10.768181 | DNAAF2       | 0.260124571 |
| 14215 | 4.8152491 | 18.519442 | TRMT10C      | 0.260010481 |
| 14216 | 34.277433 | 131.89658 | DCTPP1       | 0.259881139 |
| 14217 | 3.2258263 | 12.425288 | NKRF         | 0.259617835 |
| 14218 | 13.41203  | 51.707106 | NUP153       | 0.259384669 |
| 14219 | 11.80705  | 45.544578 | PTGFRN       | 0.259241605 |
| 14220 | 6.0141231 | 23.200222 | DLGAP5       | 0.259226958 |
| 14221 | 5.7517668 | 22.214764 | ARHGAP11A    | 0.258916399 |
| 14222 | 0.01      | 0.0386848 | PCDH12       | 0.258499409 |
| 14223 | 0.0183434 | 0.0709613 | SV2B         | 0.258498797 |
| 14224 | 0.0320615 | 0.1240294 | SCN11A       | 0.258498796 |
| 14225 | 0.0716149 | 0.2770417 | PTGDR2       | 0.258498794 |
| 14226 | 0.0628467 | 0.2431216 | CAPN3        | 0.258498794 |
| 14227 | 0.0537944 | 0.2081031 | ABCG4        | 0.258498794 |
| 14228 | 0.0904119 | 0.3497577 | LOC100130357 | 0.258498793 |
| 14229 | 0.0954647 | 0.3693043 | LOC100288748 | 0.258498793 |
| 14230 | 0.060546  | 0.2342218 | LOC157273    | 0.258498793 |
| 14231 | 0.0959041 | 0.3710039 | CCDC7        | 0.258498793 |

|       |           |           |              |             |
|-------|-----------|-----------|--------------|-------------|
| 14232 | 0.0366063 | 0.141611  | MPPED2       | 0.258498793 |
| 14233 | 0.0731997 | 0.2831722 | CCDC13       | 0.258498793 |
| 14234 | 0.0666665 | 0.2578987 | MGC70870     | 0.258498793 |
| 14235 | 0.1228771 | 0.4753487 | C6orf141     | 0.258498793 |
| 14236 | 0.1029642 | 0.3983159 | STAG3L1      | 0.258498793 |
| 14237 | 0.187522  | 0.7254272 | ITGA2B       | 0.258498793 |
| 14238 | 0.2471385 | 0.9560526 | PAR5         | 0.258498792 |
| 14239 | 0.2001916 | 0.7744394 | CFLAR-AS1    | 0.258498792 |
| 14240 | 0.2346841 | 0.9078732 | LOC646626    | 0.258498792 |
| 14241 | 0.4884363 | 1.8895111 | ANXA2R       | 0.258498792 |
| 14242 | 0.074455  | 0.2880284 | LOC100129055 | 0.258498792 |
| 14243 | 0.5448353 | 2.1076899 | C19orf73     | 0.258498792 |
| 14244 | 0.0871235 | 0.3370365 | AQP4-AS1     | 0.258498792 |
| 14245 | 0.2280082 | 0.8820475 | RPS15AP10    | 0.258498792 |
| 14246 | 0.9140329 | 3.5359271 | MT1F         | 0.258498792 |
| 14247 | 0.1638361 | 0.6337983 | SMCO2        | 0.258498792 |
| 14248 | 0.0673125 | 0.2603977 | ZNF577       | 0.258498792 |
| 14249 | 0.2029206 | 0.7849965 | ECSCR        | 0.258498792 |
| 14250 | 0.0795114 | 0.3075892 | ZNF876P      | 0.258498792 |
| 14251 | 1.6015331 | 6.195515  | COMTD1       | 0.258498792 |
| 14252 | 1.3427803 | 5.1945321 | PLS1         | 0.258498792 |
| 14253 | 0.9057566 | 3.5039104 | CNTLN        | 0.258498792 |
| 14254 | 0.1688129 | 0.6530509 | LOC100499405 | 0.258498792 |
| 14255 | 1.5211642 | 5.8846087 | SNORA4       | 0.258498792 |
| 14256 | 0.2952818 | 1.1422949 | PRTG         | 0.258498792 |
| 14257 | 0.9723149 | 3.7613906 | FAHD2B       | 0.258498792 |
| 14258 | 0.1319402 | 0.5104092 | PPARGC1A     | 0.258498792 |
| 14259 | 0.4110444 | 1.5901211 | ARVCF        | 0.258498792 |
| 14260 | 0.0735614 | 0.2845716 | RHD          | 0.258498792 |
| 14261 | 2.2873116 | 8.8484421 | RNF144A      | 0.258498792 |
| 14262 | 1.0312166 | 3.9892511 | ACTR3B       | 0.258498792 |
| 14263 | 0.3381736 | 1.3082213 | DGAT2        | 0.258498792 |
| 14264 | 0.761045  | 2.9440952 | FAM86B3P     | 0.258498792 |
| 14265 | 3.6086494 | 13.960024 | MSMP         | 0.258498792 |
| 14266 | 0.2270147 | 0.8782041 | CCDC19       | 0.258498792 |
| 14267 | 2.6049938 | 10.077392 | SNORD104     | 0.258498792 |
| 14268 | 3.9718785 | 15.365172 | PDSS1        | 0.258498792 |
| 14269 | 0.171805  | 0.664626  | AGAP5        | 0.258498792 |
| 14270 | 0.296022  | 1.1451582 | NACAP1       | 0.258498792 |
| 14271 | 0.1660774 | 0.6424689 | WDR17        | 0.258498792 |
| 14272 | 0.1370148 | 0.5300404 | OTUD7A       | 0.258498792 |
| 14273 | 0.0684624 | 0.2648461 | MICALCL      | 0.258498792 |
| 14274 | 0.2137431 | 0.826863  | ZNF565       | 0.258498792 |

|       |           |           |              |             |
|-------|-----------|-----------|--------------|-------------|
| 14275 | 0.0594069 | 0.2298151 | CPB2-AS1     | 0.258498792 |
| 14276 | 0.1229133 | 0.4754889 | OPRL1        | 0.258498792 |
| 14277 | 0.1866264 | 0.7219624 | ATP1B2       | 0.258498792 |
| 14278 | 0.3506441 | 1.3564634 | CCT6P1       | 0.258498792 |
| 14279 | 0.1250897 | 0.4839084 | LINC00693    | 0.258498792 |
| 14280 | 0.0815654 | 0.3155348 | PSMD6-AS2    | 0.258498792 |
| 14281 | 0.2051176 | 0.7934955 | LOC91450     | 0.258498792 |
| 14282 | 0.2083995 | 0.8061914 | CYP2B7P1     | 0.258498792 |
| 14283 | 0.3225998 | 1.2479743 | C14orf178    | 0.258498792 |
| 14284 | 0.0644402 | 0.2492861 | TECTA        | 0.258498792 |
| 14285 | 0.1126788 | 0.4358969 | LOC100294362 | 0.258498792 |
| 14286 | 0.1760131 | 0.6809049 | MESP1        | 0.258498792 |
| 14287 | 0.1606781 | 0.6215816 | PLXDC2       | 0.258498791 |
| 14288 | 0.0729435 | 0.2821811 | TSC22D1-AS1  | 0.258498791 |
| 14289 | 0.1195637 | 0.4625309 | GPR19        | 0.258498791 |
| 14290 | 0.0509161 | 0.1969683 | PITRM1-AS1   | 0.258498791 |
| 14291 | 0.0458525 | 0.1773798 | FGF9         | 0.258498791 |
| 14292 | 0.0909247 | 0.3517414 | FBXO24       | 0.258498791 |
| 14293 | 0.0330269 | 0.1277641 | ABCA9        | 0.258498791 |
| 14294 | 0.0761416 | 0.2945529 | LOC100996307 | 0.258498791 |
| 14295 | 0.0424266 | 0.1641269 | NAALADL2     | 0.258498791 |
| 14296 | 0.0893268 | 0.34556   | CEACAM8      | 0.258498791 |
| 14297 | 0.0342537 | 0.1325101 | SLC12A5      | 0.258498791 |
| 14298 | 0.0967051 | 0.3741027 | AGXT2L1      | 0.25849879  |
| 14299 | 0.012253  | 0.0474007 | KSR2         | 0.25849879  |
| 14300 | 0.0398393 | 0.154118  | PTCHD2       | 0.25849879  |
| 14301 | 0.0480515 | 0.1858869 | POTEF        | 0.25849879  |
| 14302 | 0.0381474 | 0.147573  | SPOCK2       | 0.25849879  |
| 14303 | 0.038514  | 0.1489912 | GUCY1A2      | 0.258498789 |
| 14304 | 2.6138043 | 10.139879 | UACA         | 0.257774706 |
| 14305 | 10.595441 | 41.118894 | ALDH1B1      | 0.257678161 |
| 14306 | 4.1295753 | 16.037141 | OPA1         | 0.257500727 |
| 14307 | 1.5890388 | 6.1756401 | CHML         | 0.257307553 |
| 14308 | 0.01      | 0.0389314 | LRRC37A      | 0.256862083 |
| 14309 | 6.157258  | 23.991065 | AGO2         | 0.256647965 |
| 14310 | 0.01      | 0.0389992 | ABCC12       | 0.256415543 |
| 14311 | 2.069166  | 8.0712525 | KIAA0586     | 0.256362438 |
| 14312 | 8.9639519 | 35.012233 | ZC3H14       | 0.256023428 |
| 14313 | 7.8567813 | 30.707866 | DNMBP        | 0.255855655 |
| 14314 | 5.0998765 | 19.953013 | C16orf74     | 0.255594311 |
| 14315 | 1.5431285 | 6.0441968 | ANAPC4       | 0.255307449 |
| 14316 | 9.2715047 | 36.32952  | PAK1         | 0.255205814 |
| 14317 | 20.584824 | 80.916577 | EIF5         | 0.254395637 |

|       |           |           |          |             |
|-------|-----------|-----------|----------|-------------|
| 14318 | 2.4868675 | 9.7807627 | GPATCH11 | 0.254261107 |
| 14319 | 2.1708281 | 8.5409717 | ERCC6L   | 0.25416641  |
| 14320 | 3.4106013 | 13.421358 | CDK8     | 0.254117457 |
| 14321 | 1.880979  | 7.4020062 | MREG     | 0.254117457 |
| 14322 | 12.483165 | 49.129384 | PNN      | 0.25408755  |
| 14323 | 12.854831 | 50.606354 | CLNS1A   | 0.254016154 |
| 14324 | 0.9160418 | 3.6069787 | ENTPD1   | 0.253963726 |
| 14325 | 6.3462454 | 25.04681  | 4-Mar    | 0.253375393 |
| 14326 | 2.0639137 | 8.146072  | E2F8     | 0.253363054 |
| 14327 | 4.5143649 | 17.820989 | PIK3R4   | 0.253317302 |
| 14328 | 4.3643874 | 17.235331 | C14orf80 | 0.253223307 |
| 14329 | 2.2917468 | 9.0583302 | TOPORS   | 0.252998818 |
| 14330 | 3.7073766 | 14.667903 | MCM8     | 0.252754375 |
| 14331 | 9.0479075 | 35.807701 | WDR43    | 0.252680491 |
| 14332 | 1.7928267 | 7.0960768 | SIX4     | 0.252650403 |
| 14333 | 3.4473189 | 13.65177  | FBXO45   | 0.2525181   |
| 14334 | 4.2372528 | 16.785803 | SCUBE3   | 0.252430745 |
| 14335 | 0.3539394 | 1.4034412 | RNF125   | 0.252193944 |
| 14336 | 5.5507413 | 22.009812 | CLPB     | 0.252193944 |
| 14337 | 12.481277 | 49.518221 | SRPK1    | 0.252054224 |
| 14338 | 0.01      | 0.0396826 | SYK      | 0.251999712 |
| 14339 | 6.3569344 | 25.229731 | SLC25A23 | 0.251962041 |
| 14340 | 4.031538  | 16.045848 | MRPS31   | 0.251251162 |
| 14341 | 1.1666872 | 4.654359  | DNA2     | 0.250665495 |
| 14342 | 4.0619285 | 16.204578 | IQSEC1   | 0.250665495 |
| 14343 | 2.5200781 | 10.066796 | HOXD9    | 0.250335672 |
| 14344 | 8.9314072 | 35.702762 | SFXN4    | 0.250160121 |
| 14345 | 2.8534626 | 11.412781 | PDE4B    | 0.250023422 |
| 14346 | 2.3581927 | 9.4356769 | ZFPM2    | 0.249923003 |
| 14347 | 3.2023564 | 12.817109 | GUF1     | 0.249850134 |
| 14348 | 14.56682  | 58.305724 | MSH6     | 0.249835154 |
| 14349 | 17.248805 | 69.339995 | PREX1    | 0.248756945 |
| 14350 | 0.01      | 0.0402131 | KL       | 0.248675443 |
| 14351 | 1.3994057 | 5.6301306 | SLC25A51 | 0.248556531 |
| 14352 | 20.312154 | 81.825642 | BRIX1    | 0.248237025 |
| 14353 | 0.4111795 | 1.6569208 | C1orf170 | 0.248158841 |
| 14354 | 0.516693  | 2.0821059 | MAPK11   | 0.248158841 |
| 14355 | 1.1728886 | 4.7263624 | BRWD3    | 0.24815884  |
| 14356 | 1.0308302 | 4.1539128 | NSUN6    | 0.24815884  |
| 14357 | 6.7945808 | 27.411258 | TFAP4    | 0.247875554 |
| 14358 | 19.190149 | 77.508132 | DHX15    | 0.247588852 |
| 14359 | 3.5102753 | 14.204835 | RLTPR    | 0.247118342 |
| 14360 | 0.01      | 0.0404715 | ABCC8    | 0.247087731 |

|       |           |           |           |             |
|-------|-----------|-----------|-----------|-------------|
| 14361 | 16.288697 | 65.977962 | NCBP2     | 0.246880869 |
| 14362 | 1.7794031 | 7.2075373 | KIF21B    | 0.246880869 |
| 14363 | 42.932086 | 174.29996 | TOMM5     | 0.246311504 |
| 14364 | 1.337037  | 5.43093   | ADAP1     | 0.246189326 |
| 14365 | 1.8817111 | 7.6433495 | C2CD5     | 0.246189326 |
| 14366 | 3.6129755 | 14.695423 | CMTM4     | 0.245857198 |
| 14367 | 9.5094047 | 38.695798 | CSTF1     | 0.245747731 |
| 14368 | 3.4692909 | 14.123175 | STAG1     | 0.245645261 |
| 14369 | 1.8365448 | 7.4785843 | HOMER1    | 0.245573852 |
| 14370 | 0.6769357 | 2.7590077 | FGFR3     | 0.245354786 |
| 14371 | 2.0114208 | 8.2017645 | DIS3      | 0.245242444 |
| 14372 | 0.01      | 0.0408322 | HFM1      | 0.244904625 |
| 14373 | 1.9639743 | 8.0197049 | SPA17     | 0.244893593 |
| 14374 | 43.137515 | 176.21149 | ATP5F1    | 0.244805343 |
| 14375 | 43.737629 | 178.7139  | DYNC1H1   | 0.244735467 |
| 14376 | 1.6836962 | 6.8797387 | XPO4      | 0.244732584 |
| 14377 | 1.9967102 | 8.1656396 | LOC90784  | 0.244525884 |
| 14378 | 1.4828645 | 6.0673955 | LOC728554 | 0.244398858 |
| 14379 | 1.5543279 | 6.3598001 | LIAS      | 0.244398858 |
| 14380 | 3.1652758 | 12.955476 | RPAP3     | 0.244319533 |
| 14381 | 1.3668177 | 5.5985513 | RASA2     | 0.244137748 |
| 14382 | 3.8158423 | 15.657785 | ALDH3A2   | 0.243702565 |
| 14383 | 2.905774  | 11.935624 | PITPNC1   | 0.243453889 |
| 14384 | 0.5612195 | 2.306764  | TRIM36    | 0.243292981 |
| 14385 | 1.2246787 | 5.0337611 | GLMN      | 0.243292981 |
| 14386 | 0.3476222 | 1.4288213 | PPP4R1L   | 0.243292981 |
| 14387 | 9.6136674 | 39.589756 | MED6      | 0.242832199 |
| 14388 | 4.1561154 | 17.13061  | FOXRED1   | 0.242613391 |
| 14389 | 0.8514122 | 3.5153694 | EPHA4     | 0.242197067 |
| 14390 | 0.01      | 0.0413516 | FLJ45445  | 0.24182843  |
| 14391 | 0.6033071 | 2.5005936 | RGS14     | 0.241265539 |
| 14392 | 0.01      | 0.0414537 | ABCC11    | 0.241233042 |
| 14393 | 3.0380364 | 12.605626 | ARID3B    | 0.241006393 |
| 14394 | 18.903494 | 78.478808 | NPM3      | 0.240873874 |
| 14395 | 0.8292857 | 3.4486898 | ARRB1     | 0.240463993 |
| 14396 | 0.4448228 | 1.8498522 | CYP27C1   | 0.240463993 |
| 14397 | 1.0089542 | 4.1958642 | B3GNT5    | 0.240463993 |
| 14398 | 2.3204075 | 9.659466  | ZNHIT6    | 0.2402211   |
| 14399 | 3.2870584 | 13.694103 | NEMF      | 0.240034593 |
| 14400 | 3.3843766 | 14.099537 | PRKRIR    | 0.240034593 |
| 14401 | 1.1060735 | 4.6108128 | SPICE1    | 0.239886879 |
| 14402 | 10.913317 | 45.543452 | PPAP2C    | 0.239624277 |
| 14403 | 6.3788108 | 26.63596  | WDR75     | 0.23948117  |

|       |           |           |              |             |
|-------|-----------|-----------|--------------|-------------|
| 14404 | 2.7371875 | 11.431072 | SLC25A19     | 0.239451513 |
| 14405 | 1.5856484 | 6.6269808 | WDR89        | 0.239271609 |
| 14406 | 3.4714586 | 14.512311 | POLE2        | 0.239207837 |
| 14407 | 7.5164228 | 31.438807 | LETM1        | 0.239081042 |
| 14408 | 0.01      | 0.0418583 | CDH1         | 0.238901086 |
| 14409 | 0.1979103 | 0.829415  | SLC2A4       | 0.23861427  |
| 14410 | 0.4132178 | 1.7317396 | GREB1L       | 0.23861427  |
| 14411 | 0.2046476 | 0.8576504 | ZCCHC18      | 0.23861427  |
| 14412 | 0.9067418 | 3.8000319 | HAGHL        | 0.23861427  |
| 14413 | 21.797323 | 91.349619 | PNP          | 0.23861427  |
| 14414 | 0.2721805 | 1.1406713 | MARVELD2     | 0.23861427  |
| 14415 | 2.0859817 | 8.7420658 | HSD11B1L     | 0.23861427  |
| 14416 | 0.7974471 | 3.3419924 | LOC100134868 | 0.23861427  |
| 14417 | 0.233196  | 0.9772928 | AOC2         | 0.23861427  |
| 14418 | 0.1910753 | 0.8007708 | RAMP2-AS1    | 0.238614269 |
| 14419 | 0.2552873 | 1.0698742 | SYP          | 0.238614269 |
| 14420 | 2.736803  | 11.495519 | SLC4A7       | 0.238075637 |
| 14421 | 3.0167614 | 12.688527 | NIN          | 0.237755062 |
| 14422 | 15.319819 | 64.498532 | SLC29A1      | 0.237521986 |
| 14423 | 0.01      | 0.0421032 | PCSK2        | 0.237511841 |
| 14424 | 0.01      | 0.0421472 | KCNT1        | 0.237263759 |
| 14425 | 142.09057 | 600.78617 | RPS21        | 0.236507723 |
| 14426 | 1.6376423 | 6.924524  | FOXN2        | 0.236498895 |
| 14427 | 0.01      | 0.0422976 | VWA3B        | 0.23642029  |
| 14428 | 0.7146147 | 3.0236497 | ITGAX        | 0.236341753 |
| 14429 | 21.504216 | 91.137519 | TUBB3        | 0.235953497 |
| 14430 | 0.3835212 | 1.6263062 | FAM105A      | 0.23582346  |
| 14431 | 0.6003827 | 2.5483803 | SOBP         | 0.235593836 |
| 14432 | 4.5025946 | 19.125913 | NFX1         | 0.235418543 |
| 14433 | 5.2099875 | 22.144858 | VMA21        | 0.235268499 |
| 14434 | 8.7960828 | 37.400113 | NPAS2        | 0.235188672 |
| 14435 | 39.751427 | 169.05954 | PAICS        | 0.235132709 |
| 14436 | 0.3140439 | 1.3363631 | TMEM144      | 0.234998902 |
| 14437 | 0.7843414 | 3.3376384 | CYP2S1       | 0.234998902 |
| 14438 | 1.0797902 | 4.5948732 | NOI14-AS1    | 0.234998902 |
| 14439 | 0.01      | 0.0425566 | MAPK4        | 0.234981421 |
| 14440 | 0.01      | 0.0425655 | CXorf36      | 0.234931809 |
| 14441 | 0.8847528 | 3.7727019 | MYO1D        | 0.234514368 |
| 14442 | 5.3022866 | 22.638997 | FRMD3        | 0.234210315 |
| 14443 | 0.5407122 | 2.3096294 | PARD6B       | 0.234112114 |
| 14444 | 1.375196  | 5.8740918 | EXOC6        | 0.234112114 |
| 14445 | 6.2687675 | 26.780754 | SKIV2L2      | 0.234077338 |
| 14446 | 2.558476  | 10.932171 | IPO11        | 0.234031828 |



|       |           |           |             |             |
|-------|-----------|-----------|-------------|-------------|
| 14447 | 1.7356106 | 7.4161307 | RSBN1       | 0.234031828 |
| 14448 | 9.3076871 | 39.77918  | YAP1        | 0.233983883 |
| 14449 | 0.361715  | 1.5492148 | TMED10P1    | 0.23348278  |
| 14450 | 1.5779302 | 6.7582296 | CREB3L4     | 0.23348278  |
| 14451 | 5.5844409 | 23.928218 | DHX33       | 0.233383065 |
| 14452 | 0.01      | 0.0428734 | ITPK1-AS1   | 0.233244861 |
| 14453 | 0.01      | 0.0428825 | SEMA3G      | 0.233195245 |
| 14454 | 1.4403876 | 6.1837    | PCF11       | 0.232932977 |
| 14455 | 1.4477773 | 6.2230134 | PLD6        | 0.232648913 |
| 14456 | 5.5978642 | 24.094843 | BAZ1A       | 0.232326238 |
| 14457 | 1.5174721 | 6.5342315 | CHST11      | 0.232234209 |
| 14458 | 1.7223099 | 7.4198682 | ZBTB33      | 0.232121364 |
| 14459 | 2.7698841 | 11.935325 | C14orf132   | 0.232074471 |
| 14460 | 3.5398309 | 15.312159 | PGM2        | 0.231177782 |
| 14461 | 9.0743859 | 39.320114 | YES1        | 0.230782291 |
| 14462 | 3.9308888 | 17.047086 | RAP1GAP2    | 0.230590073 |
| 14463 | 3.1958554 | 13.872587 | MPP5        | 0.230371981 |
| 14464 | 2.4464723 | 10.62303  | CHEK1       | 0.230298924 |
| 14465 | 20.038413 | 87.035514 | CLUH        | 0.23023261  |
| 14466 | 12.171127 | 52.873279 | WHSC1       | 0.23019429  |
| 14467 | 0.183531  | 0.7987365 | CTSL2       | 0.229776705 |
| 14468 | 0.0882768 | 0.3841852 | SESN3       | 0.229776704 |
| 14469 | 0.3256242 | 1.4171333 | HLA-DRB1    | 0.229776704 |
| 14470 | 0.1758646 | 0.7653716 | NEUROG2     | 0.229776704 |
| 14471 | 3.6401659 | 15.842189 | GPR125      | 0.229776704 |
| 14472 | 0.2182194 | 0.9497019 | RNF32       | 0.229776704 |
| 14473 | 22.17765  | 96.518268 | GART        | 0.229776704 |
| 14474 | 4.9067247 | 21.354317 | FAM216A     | 0.229776704 |
| 14475 | 2.2217431 | 9.6691398 | ZCCHC4      | 0.229776704 |
| 14476 | 0.1909295 | 0.8309348 | LRRC48      | 0.229776704 |
| 14477 | 0.5959948 | 2.5937997 | 3-Mar       | 0.229776704 |
| 14478 | 0.1460403 | 0.6355749 | XKRX        | 0.229776703 |
| 14479 | 0.0808063 | 0.3516733 | LRP2BP      | 0.229776703 |
| 14480 | 0.0494365 | 0.2151501 | TRPM6       | 0.229776702 |
| 14481 | 28.622581 | 124.70103 | SERBP1      | 0.229529632 |
| 14482 | 6.1293971 | 26.705389 | PPP2R5E     | 0.229519107 |
| 14483 | 0.01      | 0.0436062 | RAPGEF4-AS1 | 0.229325198 |
| 14484 | 12.236981 | 53.435283 | CCNB1IP1    | 0.229005641 |
| 14485 | 6.0974956 | 26.650018 | HK2         | 0.228798931 |
| 14486 | 3.8203885 | 16.704585 | OTUB2       | 0.228702981 |
| 14487 | 1.8708776 | 8.1814895 | SFXN2       | 0.228672008 |
| 14488 | 1.7024838 | 7.4467177 | SLC39A10    | 0.228622047 |
| 14489 | 7.312889  | 32.015817 | CCDC6       | 0.228414881 |

|       |           |           |          |             |
|-------|-----------|-----------|----------|-------------|
| 14490 | 512.6383  | 2244.6356 | RPLP2    | 0.228383751 |
| 14491 | 5.1772399 | 22.682428 | CEBPZ    | 0.228248933 |
| 14492 | 1.1703454 | 5.131132  | KCNK6    | 0.228087169 |
| 14493 | 5.0857994 | 22.305238 | RRP8     | 0.228009191 |
| 14494 | 33.250733 | 145.93785 | NOLC1    | 0.227841742 |
| 14495 | 1.2181169 | 5.3503934 | TMEM218  | 0.227668661 |
| 14496 | 3.1277301 | 13.780092 | TFB2M    | 0.226974549 |
| 14497 | 2.2697808 | 10.000155 | ACTR5    | 0.226974549 |
| 14498 | 4.5416719 | 20.015786 | DHX36    | 0.226904495 |
| 14499 | 45.55952  | 200.82906 | EMP1     | 0.226857208 |
| 14500 | 2.4481865 | 10.810644 | SBNO1    | 0.226460741 |
| 14501 | 1.5571569 | 6.8772242 | LRIG2    | 0.2264223   |
| 14502 | 0.9952221 | 4.3974076 | SNHG4    | 0.226320178 |
| 14503 | 1.7926839 | 7.9222511 | PHF14    | 0.226284657 |
| 14504 | 0.8637043 | 3.8185501 | HTR7     | 0.226186443 |
| 14505 | 93.289203 | 412.53272 | HSP90AA1 | 0.226137707 |
| 14506 | 0.01      | 0.0442962 | SCUBE2   | 0.225752846 |
| 14507 | 12.759153 | 56.568892 | EIF2S1   | 0.2255507   |
| 14508 | 14.064153 | 62.386736 | ERO1L    | 0.225434993 |
| 14509 | 4.8748421 | 21.637763 | PLXNA2   | 0.225293256 |
| 14510 | 0.01      | 0.0443938 | SCML4    | 0.225256685 |
| 14511 | 26.913625 | 119.52757 | ANPEP    | 0.225166667 |
| 14512 | 5.3331722 | 23.686778 | PDS5A    | 0.225153977 |
| 14513 | 0.1215725 | 0.5408471 | CDH6     | 0.224781559 |
| 14514 | 0.3604281 | 1.6034592 | TMC6     | 0.224781558 |
| 14515 | 0.3315296 | 1.4748968 | ALG10    | 0.224781558 |
| 14516 | 1.4230079 | 6.3306254 | C11orf63 | 0.224781558 |
| 14517 | 0.2777179 | 1.2355012 | GARNL3   | 0.224781558 |
| 14518 | 16.892039 | 75.148688 | GNL3     | 0.224781558 |
| 14519 | 0.5537631 | 2.4635609 | SEPSECS  | 0.224781558 |
| 14520 | 5.9470918 | 26.516611 | U2SURP   | 0.224277974 |
| 14521 | 13.542825 | 60.458828 | NUMB     | 0.224000781 |
| 14522 | 3.591698  | 16.062191 | TMEM33   | 0.223611963 |
| 14523 | 1.0578655 | 4.7317705 | CCDC66   | 0.223566523 |
| 14524 | 0.4537823 | 2.0297415 | VSIG10L  | 0.223566523 |
| 14525 | 0.0479079 | 0.2142986 | WDR72    | 0.223556886 |
| 14526 | 1.5713017 | 7.033768  | USP28    | 0.223394018 |
| 14527 | 22.364535 | 100.28626 | TBX15    | 0.223006967 |
| 14528 | 0.8417181 | 3.7829128 | ADAMTSL4 | 0.222505289 |
| 14529 | 3.2669262 | 14.695432 | PRMT3    | 0.222308961 |
| 14530 | 10.778062 | 48.621104 | NOPI4    | 0.221674564 |
| 14531 | 6.3482136 | 28.641741 | SPRED1   | 0.221642029 |
| 14532 | 0.227759  | 1.0279307 | ESR2     | 0.221570394 |

|       |           |           |           |             |
|-------|-----------|-----------|-----------|-------------|
| 14533 | 0.5567217 | 2.5126179 | FRMD6-AS1 | 0.221570393 |
| 14534 | 0.8540963 | 3.8547402 | SAMD10    | 0.221570393 |
| 14535 | 0.3208614 | 1.4481241 | ZNF486    | 0.221570393 |
| 14536 | 0.6334331 | 2.8588347 | CHIC1     | 0.221570393 |
| 14537 | 0.282002  | 1.2727424 | NPEPL1    | 0.221570393 |
| 14538 | 0.2163317 | 0.9763564 | PALM      | 0.221570393 |
| 14539 | 7.0153316 | 31.693494 | PITPNM1   | 0.221349265 |
| 14540 | 2.4329616 | 11.06248  | RAD18     | 0.219929131 |
| 14541 | 5.847246  | 26.596187 | MCM10     | 0.219852793 |
| 14542 | 3.7992402 | 17.290968 | FSD1      | 0.219723973 |
| 14543 | 0.7703395 | 3.5059421 | CAND2     | 0.219723973 |
| 14544 | 3.885169  | 17.713619 | FAM208B   | 0.219332308 |
| 14545 | 7.7115339 | 35.198112 | BUD13     | 0.219089416 |
| 14546 | 1.1447663 | 5.2337019 | AP1S3     | 0.218729747 |
| 14547 | 0.01      | 0.045744  | UNC13D    | 0.218608139 |
| 14548 | 1.2707287 | 5.8170314 | CPE       | 0.218449684 |
| 14549 | 1.0325697 | 4.732597  | SEMA4D    | 0.218182467 |
| 14550 | 2.4188748 | 11.098908 | SLC12A6   | 0.217938092 |
| 14551 | 7.9707386 | 36.591839 | SMC3      | 0.217828315 |
| 14552 | 0.100871  | 0.4633845 | CACNA1G   | 0.217683194 |
| 14553 | 0.1138951 | 0.5232148 | PDE3A     | 0.217683194 |
| 14554 | 0.3413587 | 1.5681446 | SHC3      | 0.217683194 |
| 14555 | 1.4463817 | 6.6444345 | ZNF121    | 0.217683193 |
| 14556 | 0.6309162 | 2.8983229 | JAK2      | 0.217683193 |
| 14557 | 4.7775379 | 21.987038 | DCLRE1B   | 0.21728884  |
| 14558 | 1.3853043 | 6.3896198 | TMCC3     | 0.216805438 |
| 14559 | 1.9158279 | 8.8524591 | SMCO4     | 0.216417593 |
| 14560 | 3.5016719 | 16.20704  | FLI1      | 0.216058692 |
| 14561 | 0.2066635 | 0.959371  | RTEL1     | 0.215415661 |
| 14562 | 0.7086008 | 3.2894582 | GCH1      | 0.21541566  |
| 14563 | 0.9654084 | 4.4816075 | APLN      | 0.21541566  |
| 14564 | 1.5722331 | 7.2986018 | TRMT5     | 0.21541566  |
| 14565 | 5.1383214 | 23.853054 | PDZD8     | 0.21541566  |
| 14566 | 0.4526488 | 2.1012808 | DMRTA1    | 0.21541566  |
| 14567 | 0.3472168 | 1.6118455 | CABP7     | 0.21541566  |
| 14568 | 14.797166 | 68.804022 | PYGL      | 0.21506252  |
| 14569 | 5.9796447 | 27.827345 | SKP2      | 0.21488377  |
| 14570 | 1.1253778 | 5.2440039 | L2HGDH    | 0.214602771 |
| 14571 | 6.177283  | 28.805781 | DLAT      | 0.214445943 |
| 14572 | 0.01      | 0.0466546 | KIAA0087  | 0.214341164 |
| 14573 | 0.7509892 | 3.510443  | TNFRSF25  | 0.213930035 |
| 14574 | 3.6668534 | 17.140433 | RPPH1     | 0.213930035 |
| 14575 | 0.4635392 | 2.1667795 | LPCAT2    | 0.213930035 |

|       |           |           |              |             |
|-------|-----------|-----------|--------------|-------------|
| 14576 | 0.01      | 0.046752  | FAM205A      | 0.21389462  |
| 14577 | 51.128587 | 239.12202 | CCT6A        | 0.213817983 |
| 14578 | 0.3938926 | 1.8461056 | CPEB2        | 0.213364082 |
| 14579 | 1.0609429 | 4.9837286 | RGS2         | 0.212881358 |
| 14580 | 0.0851305 | 0.4005323 | ZNF573       | 0.212543452 |
| 14581 | 0.1913458 | 0.9021423 | CCDC144B     | 0.212101573 |
| 14582 | 2.8728908 | 13.558774 | HOXB3        | 0.211884256 |
| 14583 | 4.8830478 | 23.06971  | PPAT         | 0.211664893 |
| 14584 | 1.6334944 | 7.7326526 | ASRGL1       | 0.211246325 |
| 14585 | 6.1230781 | 29.08938  | MSX1         | 0.210491874 |
| 14586 | 3.8000455 | 18.056451 | AHNAK2       | 0.210453617 |
| 14587 | 10.83288  | 51.50296  | LRPPRC       | 0.210335102 |
| 14588 | 0.01      | 0.0475461 | GRM7         | 0.210322268 |
| 14589 | 4.140837  | 19.695229 | IRX2         | 0.210245684 |
| 14590 | 0.01      | 0.047591  | BMS1P5       | 0.210123803 |
| 14591 | 0.7968216 | 3.7938418 | FBXO32       | 0.210030269 |
| 14592 | 0.01      | 0.0476247 | LOC100507351 | 0.209974953 |
| 14593 | 1.3322342 | 6.3501377 | SETMAR       | 0.209796121 |
| 14594 | 1.8395921 | 8.7684751 | TCEA3        | 0.209796121 |
| 14595 | 0.4108418 | 1.9618383 | CDON         | 0.209416743 |
| 14596 | 9.6458349 | 46.165125 | IRF2BPL      | 0.208942029 |
| 14597 | 0.9633934 | 4.6162461 | DDX58        | 0.208696273 |
| 14598 | 0.01      | 0.0479334 | MUC4         | 0.208622919 |
| 14599 | 1.7117002 | 8.2179967 | PLEKHG4      | 0.208286797 |
| 14600 | 3.0862569 | 14.849323 | ZCCHC7       | 0.207838225 |
| 14601 | 1.1965522 | 5.7585099 | OSBPL6       | 0.207788503 |
| 14602 | 6.9774742 | 33.65906  | NELFA        | 0.207298548 |
| 14603 | 0.0449913 | 0.2175603 | PCDHB19P     | 0.206799036 |
| 14604 | 0.0159559 | 0.0771564 | PLXNA4       | 0.206799035 |
| 14605 | 0.0768435 | 0.3715853 | LOC100507462 | 0.206799035 |
| 14606 | 0.0704052 | 0.3404524 | ZSCAN18      | 0.206799035 |
| 14607 | 0.0856202 | 0.414026  | LOC100506178 | 0.206799035 |
| 14608 | 0.0904119 | 0.4371971 | LOC100131347 | 0.206799035 |
| 14609 | 0.1592051 | 0.7698543 | GALR2        | 0.206799034 |
| 14610 | 0.1357651 | 0.6565076 | C11orf93     | 0.206799034 |
| 14611 | 0.1493903 | 0.7223937 | IL17RE       | 0.206799034 |
| 14612 | 0.1269954 | 0.6141007 | DDTL         | 0.206799034 |
| 14613 | 0.0535181 | 0.2587928 | CCDC39       | 0.206799034 |
| 14614 | 0.2100096 | 1.0155249 | HCAR1        | 0.206799034 |
| 14615 | 0.2155114 | 1.0421295 | GRAPL        | 0.206799034 |
| 14616 | 0.0715166 | 0.3458268 | VWA7         | 0.206799034 |
| 14617 | 0.3839696 | 1.8567282 | EGR3         | 0.206799034 |
| 14618 | 0.4895838 | 2.3674375 | HSD17B14     | 0.206799034 |

|       |           |           |                |             |
|-------|-----------|-----------|----------------|-------------|
| 14619 | 0.2727742 | 1.3190304 | TSACC          | 0.206799034 |
| 14620 | 0.2598498 | 1.2565327 | HOXA6          | 0.206799034 |
| 14621 | 0.2096574 | 1.0138222 | LRRC6          | 0.206799034 |
| 14622 | 0.1381044 | 0.6678192 | KLF14          | 0.206799034 |
| 14623 | 0.0996174 | 0.4817109 | LINC00327      | 0.206799034 |
| 14624 | 0.3033472 | 1.4668693 | BMI1           | 0.206799034 |
| 14625 | 0.8591825 | 4.1546739 | IFT74          | 0.206799034 |
| 14626 | 0.1135074 | 0.5488776 | C22orf26       | 0.206799034 |
| 14627 | 0.9460418 | 4.5746917 | LOC100129269   | 0.206799034 |
| 14628 | 0.0506562 | 0.2449536 | MFSD4          | 0.206799034 |
| 14629 | 0.7899905 | 3.8200881 | FLI1-AS1       | 0.206799034 |
| 14630 | 0.172231  | 0.8328423 | C19orf57       | 0.206799034 |
| 14631 | 0.1268408 | 0.6133532 | ZNF141         | 0.206799034 |
| 14632 | 0.8880661 | 4.2943433 | ARL6           | 0.206799034 |
| 14633 | 0.9648125 | 4.6654594 | SLC43A2        | 0.206799034 |
| 14634 | 0.6157745 | 2.9776468 | DGKE           | 0.206799034 |
| 14635 | 1.4851924 | 7.1818151 | MTBP           | 0.206799034 |
| 14636 | 8.1677724 | 39.496183 | UTP14A         | 0.206799034 |
| 14637 | 0.1775124 | 0.858381  | IL18R1         | 0.206799034 |
| 14638 | 2.2575776 | 10.916771 | CHST2          | 0.206799034 |
| 14639 | 3.0947161 | 14.964848 | HELLS          | 0.206799034 |
| 14640 | 1.0182386 | 4.9238073 | PRRT3-AS1      | 0.206799034 |
| 14641 | 0.1736663 | 0.8397827 | GUSBP2         | 0.206799034 |
| 14642 | 0.0851479 | 0.4117423 | GPR64          | 0.206799034 |
| 14643 | 0.803597  | 3.8858839 | PXN-AS1        | 0.206799034 |
| 14644 | 0.1831279 | 0.8855354 | SLC2A1-AS1     | 0.206799034 |
| 14645 | 0.0729946 | 0.3529735 | GDAP1L1        | 0.206799034 |
| 14646 | 0.1726591 | 0.8349124 | ZNF823         | 0.206799033 |
| 14647 | 0.0783751 | 0.3789918 | RPL36A-HNRNPH2 | 0.206799033 |
| 14648 | 0.0457418 | 0.2211895 | KCNS1          | 0.206799033 |
| 14649 | 0.0848878 | 0.4104844 | TSNAXIP1       | 0.206799033 |
| 14650 | 0.1941309 | 0.9387417 | TCP11          | 0.206799033 |
| 14651 | 0.1326878 | 0.6416269 | EML6           | 0.206799033 |
| 14652 | 0.0486801 | 0.2353981 | SLITRK3        | 0.206799033 |
| 14653 | 0.1350612 | 0.6531038 | FAM95B1        | 0.206799033 |
| 14654 | 0.1005789 | 0.4863606 | LSP1           | 0.206799033 |
| 14655 | 0.0913232 | 0.4416035 | MYH16          | 0.206799033 |
| 14656 | 0.0522305 | 0.2525662 | TLR10          | 0.206799033 |
| 14657 | 0.0542283 | 0.2622272 | C1QTNF3        | 0.206799032 |
| 14658 | 0.0409108 | 0.1978287 | NR5A2          | 0.206799032 |
| 14659 | 0.0365934 | 0.1769516 | CASKIN1        | 0.206799032 |
| 14660 | 10.259247 | 49.675889 | MAPKAPK3       | 0.206523669 |
| 14661 | 13.289584 | 64.490761 | HHEX           | 0.206069584 |

|       |           |           |           |             |
|-------|-----------|-----------|-----------|-------------|
| 14662 | 0.01      | 0.0486243 | ADCY8     | 0.205658361 |
| 14663 | 6.7334249 | 32.777302 | EXOSC3    | 0.205429504 |
| 14664 | 16.767776 | 81.900106 | PLEK2     | 0.204734484 |
| 14665 | 3.3522708 | 16.390397 | RPP25L    | 0.204526517 |
| 14666 | 0.01      | 0.0489194 | C20orf26  | 0.204417963 |
| 14667 | 2.8649155 | 14.032378 | PIGW      | 0.204164651 |
| 14668 | 1.5803804 | 7.7440022 | RPL22L1   | 0.204077994 |
| 14669 | 12.468346 | 61.189295 | EGFR      | 0.20376679  |
| 14670 | 0.01      | 0.049218  | PTPRVP    | 0.203177563 |
| 14671 | 3.7471141 | 18.467488 | POU2F2    | 0.20290329  |
| 14672 | 3.1524506 | 15.570687 | LOC339166 | 0.202460592 |
| 14673 | 0.7346633 | 3.6314927 | SLCO3A1   | 0.202303403 |
| 14674 | 5.0764547 | 25.102761 | KIAA0040  | 0.202226946 |
| 14675 | 3.8260942 | 18.975907 | HEATR1    | 0.201629058 |
| 14676 | 1.3364654 | 6.6349655 | OSGEPL1   | 0.20142763  |
| 14677 | 0.01      | 0.0496546 | NLRP11    | 0.201391385 |
| 14678 | 0.7287854 | 3.6202363 | YOD1      | 0.201308794 |
| 14679 | 0.01      | 0.0497649 | IL2RB     | 0.200944839 |
| 14680 | 5.3105664 | 26.458019 | TIPIN     | 0.200716709 |
| 14681 | 2.5486298 | 12.703392 | HMG5      | 0.200625928 |
| 14682 | 0.01      | 0.0498634 | TSPEAR    | 0.200547913 |
| 14683 | 0.8258897 | 4.1268053 | PLLP      | 0.200128097 |
| 14684 | 0.01      | 0.0500057 | DLG2      | 0.199977327 |
| 14685 | 1.9298917 | 9.6664966 | MAGI1     | 0.199647482 |
| 14686 | 3.4330934 | 17.223651 | BAG1      | 0.19932437  |
| 14687 | 4.1035063 | 20.598889 | THOC1     | 0.199210078 |
| 14688 | 2.5271375 | 12.689318 | SPTLC2    | 0.199154711 |
| 14689 | 9.1720239 | 46.072687 | BUB1B     | 0.199077249 |
| 14690 | 166.67383 | 837.54492 | NCL       | 0.199002858 |
| 14691 | 0.4568161 | 2.297345  | NOTUM     | 0.198845225 |
| 14692 | 0.4854403 | 2.441297  | BOC       | 0.198845225 |
| 14693 | 1.4614271 | 7.3495709 | GCHFR     | 0.198845225 |
| 14694 | 1.1892686 | 5.9808758 | CC2D2A    | 0.198845225 |
| 14695 | 0.1128008 | 0.5676262 | ANKS1B    | 0.198723757 |
| 14696 | 12.989048 | 65.533622 | IPO4      | 0.198204333 |
| 14697 | 0.01      | 0.0506084 | STAB1     | 0.197595761 |
| 14698 | 0.8651506 | 4.380405  | MSANTD4   | 0.197504695 |
| 14699 | 3.2074798 | 16.264677 | UPF3B     | 0.197205264 |
| 14700 | 0.1397248 | 0.7094376 | IQCH-AS1  | 0.196951461 |
| 14701 | 0.515362  | 2.6166954 | CCDC41    | 0.196951461 |
| 14702 | 0.4541284 | 2.3057882 | JHDM1D    | 0.196951461 |
| 14703 | 0.0698565 | 0.3546891 | CUBN      | 0.19695146  |
| 14704 | 12.30403  | 62.720302 | DNPH1     | 0.196172996 |

|       |           |           |              |             |
|-------|-----------|-----------|--------------|-------------|
| 14705 | 6.4097638 | 32.743578 | CPSF2        | 0.195756367 |
| 14706 | 0.1625038 | 0.8307085 | SRGAP3       | 0.195620708 |
| 14707 | 9.025678  | 46.197484 | NOL6         | 0.195371636 |
| 14708 | 12.50397  | 64.159398 | MRPS17       | 0.194889142 |
| 14709 | 2.2882756 | 11.749246 | TBC1D14      | 0.194759364 |
| 14710 | 5.2888272 | 27.194981 | STK4         | 0.194478063 |
| 14711 | 40.249707 | 207.08053 | ZFAS1        | 0.194367412 |
| 14712 | 2.6775096 | 13.810559 | C9orf40      | 0.193874094 |
| 14713 | 0.1463137 | 0.7546842 | HES2         | 0.193874094 |
| 14714 | 0.2241658 | 1.1562444 | LRRC56       | 0.193874094 |
| 14715 | 0.1850795 | 0.9546375 | MAFB         | 0.193874094 |
| 14716 | 7.4187524 | 38.374536 | POLR1E       | 0.193324876 |
| 14717 | 0.01      | 0.0517586 | SLC44A5      | 0.193204742 |
| 14718 | 0.01      | 0.0517852 | DISC2        | 0.193105511 |
| 14719 | 3.6772653 | 19.100138 | PDGFRA       | 0.192525585 |
| 14720 | 0.01      | 0.0519721 | PROX2        | 0.192410887 |
| 14721 | 8.0947884 | 42.17886  | MELK         | 0.19191577  |
| 14722 | 0.01      | 0.0521469 | SLC11A1      | 0.19176588  |
| 14723 | 0.3142333 | 1.6410711 | ADAM8        | 0.191480587 |
| 14724 | 0.4464428 | 2.3315304 | CSPG5        | 0.191480587 |
| 14725 | 4.1088532 | 21.502894 | POLR1B       | 0.191083736 |
| 14726 | 2.3687613 | 12.400646 | CMBL         | 0.191019188 |
| 14727 | 6.5733487 | 34.454636 | DCAF4        | 0.190782708 |
| 14728 | 14.052384 | 73.657276 | ERRFI1       | 0.190780658 |
| 14729 | 0.01      | 0.0525001 | SLC6A10P     | 0.190475864 |
| 14730 | 0.86396   | 4.535871  | PITPNM2      | 0.190472794 |
| 14731 | 0.1251219 | 0.6569018 | PDZD2        | 0.190472794 |
| 14732 | 0.2470861 | 1.2972253 | LOC100129550 | 0.190472794 |
| 14733 | 2.4185629 | 12.734809 | MARS2        | 0.18991748  |
| 14734 | 2.4536013 | 12.924912 | CA12         | 0.189835051 |
| 14735 | 3.1920192 | 16.830895 | NCAPG        | 0.18965238  |
| 14736 | 13.628666 | 71.874735 | TJP2         | 0.189616918 |
| 14737 | 0.7760508 | 4.0990825 | ATXN3        | 0.189323059 |
| 14738 | 19.924644 | 105.46987 | TOP1         | 0.18891314  |
| 14739 | 0.01      | 0.0529414 | KLHL32       | 0.188888148 |
| 14740 | 3.261095  | 17.271239 | SNAPC1       | 0.188816509 |
| 14741 | 0.01      | 0.0531088 | NUTM1        | 0.188292758 |
| 14742 | 0.01      | 0.0531368 | LOC100506810 | 0.188193525 |
| 14743 | 26.178685 | 139.20747 | WDR77        | 0.188055174 |
| 14744 | 66.054061 | 351.25032 | RPL27A       | 0.188054092 |
| 14745 | 0.0704648 | 0.3748143 | NR3C2        | 0.187999122 |
| 14746 | 0.095618  | 0.5086089 | CCDC171      | 0.187999122 |
| 14747 | 0.0968624 | 0.5152281 | DKFZP434L187 | 0.187999122 |

|       |           |           |            |             |
|-------|-----------|-----------|------------|-------------|
| 14748 | 0.085296  | 0.4537044 | SLC24A4    | 0.187999122 |
| 14749 | 0.5107831 | 2.716944  | CCL28      | 0.187999122 |
| 14750 | 0.4669145 | 2.4835993 | IRF8       | 0.187999122 |
| 14751 | 0.5455484 | 2.9018669 | TEX40      | 0.187999122 |
| 14752 | 0.9025531 | 4.8008366 | MPV17L     | 0.187999122 |
| 14753 | 1.5718378 | 8.3608786 | ECHDC2     | 0.187999122 |
| 14754 | 0.0802154 | 0.4266794 | DNAH5      | 0.187999121 |
| 14755 | 0.2870517 | 1.5268776 | SPAG4      | 0.187999121 |
| 14756 | 0.1398185 | 0.743719  | GPER       | 0.187999121 |
| 14757 | 0.0923347 | 0.4911445 | DENND2C    | 0.187999121 |
| 14758 | 0.01      | 0.0531929 | TMEM132B   | 0.18799506  |
| 14759 | 1.994838  | 10.630576 | FAM217B    | 0.187650975 |
| 14760 | 1.9432294 | 10.359293 | KIAA1737   | 0.187583194 |
| 14761 | 0.01      | 0.0534468 | PNMA3      | 0.187101972 |
| 14762 | 2.5896732 | 13.841837 | BOD1L1     | 0.187090286 |
| 14763 | 0.01      | 0.0536032 | LOC400680  | 0.186556197 |
| 14764 | 0.6278813 | 3.3674113 | SRRM3      | 0.186458145 |
| 14765 | 0.01      | 0.0537461 | ATP12A     | 0.186060036 |
| 14766 | 29.353463 | 157.84338 | TOMM34     | 0.185965757 |
| 14767 | 0.01      | 0.0538322 | LRRN3      | 0.185762342 |
| 14768 | 1.7345975 | 9.3464519 | NUDT8      | 0.185588876 |
| 14769 | 3.5917772 | 19.363966 | ATP6V0E2   | 0.185487683 |
| 14770 | 7.314867  | 39.452443 | ARHGEF12   | 0.185409737 |
| 14771 | 1.6968596 | 9.1778423 | CDC7       | 0.184886553 |
| 14772 | 0.2634633 | 1.4268874 | TRHDE-AS1  | 0.184641995 |
| 14773 | 0.2277092 | 1.2332473 | FAM160A1   | 0.184641994 |
| 14774 | 0.5962134 | 3.2378946 | GAN        | 0.184136126 |
| 14775 | 3.3971466 | 18.458294 | WEE1       | 0.184044447 |
| 14776 | 3.8806147 | 21.098114 | KIAA0947   | 0.183931833 |
| 14777 | 1.2610458 | 6.8658164 | TMEM136    | 0.183670194 |
| 14778 | 25.522136 | 139.38653 | PSAT1      | 0.183103311 |
| 14779 | 16.600619 | 90.756239 | GRPEL1     | 0.18291435  |
| 14780 | 0.7873834 | 4.3047848 | DDHD1      | 0.182908893 |
| 14781 | 2.9313032 | 16.027396 | UTP20      | 0.182893296 |
| 14782 | 0.01      | 0.0547238 | ZNF705D    | 0.182735765 |
| 14783 | 0.01      | 0.0547982 | FLJ31485   | 0.182487686 |
| 14784 | 0.6915913 | 3.7901697 | SNX10      | 0.182469736 |
| 14785 | 1.3291491 | 7.2842166 | ARHGEF39   | 0.182469736 |
| 14786 | 0.6023107 | 3.30088   | HOXA9      | 0.182469736 |
| 14787 | 0.1348573 | 0.7390667 | JAKMIP2    | 0.182469735 |
| 14788 | 0.01      | 0.0548206 | GRIN2A     | 0.18241326  |
| 14789 | 0.01      | 0.0549177 | ANKRD20A8P | 0.182090755 |
| 14790 | 2.8632683 | 15.754111 | TFAM       | 0.181747369 |



|       |           |           |              |             |
|-------|-----------|-----------|--------------|-------------|
| 14791 | 3.6458975 | 20.098368 | ARMCX2       | 0.181402661 |
| 14792 | 0.7682178 | 4.2364567 | CLMN         | 0.181334973 |
| 14793 | 3.4068906 | 18.813768 | FOCAD        | 0.181084968 |
| 14794 | 5.2225417 | 28.848053 | GREM1        | 0.181036191 |
| 14795 | 0.8362741 | 4.6370024 | NFXL1        | 0.180347995 |
| 14796 | 0.01      | 0.0554617 | ERN2         | 0.180304581 |
| 14797 | 0.8481101 | 4.7163016 | NBEAL2       | 0.179825247 |
| 14798 | 1.834099  | 10.199341 | TBC1D4       | 0.179825247 |
| 14799 | 0.01      | 0.0556147 | GMNC         | 0.179808421 |
| 14800 | 1.459741  | 8.1383144 | CEP72        | 0.179366509 |
| 14801 | 81.436487 | 454.18902 | TM4SF1       | 0.179300873 |
| 14802 | 0.700412  | 3.9079857 | PPP4R4       | 0.179225829 |
| 14803 | 2.4073735 | 13.436523 | MDN1         | 0.179166404 |
| 14804 | 4.8365462 | 27.071738 | EPHB2        | 0.178656658 |
| 14805 | 0.2780143 | 1.5594684 | USP2         | 0.178275029 |
| 14806 | 0.472347  | 2.6495411 | ZNF114       | 0.178275029 |
| 14807 | 0.5706449 | 3.2009242 | ADSSL1       | 0.178275029 |
| 14808 | 0.6424152 | 3.6035065 | LOC100505761 | 0.178275029 |
| 14809 | 0.3843658 | 2.1595677 | BRCA2        | 0.177982775 |
| 14810 | 15.786034 | 89.025618 | TFRC         | 0.177320122 |
| 14811 | 0.01      | 0.0565193 | FAM13C       | 0.17693069  |
| 14812 | 1.4731884 | 8.3293292 | C17orf97     | 0.176867595 |
| 14813 | 1.3508818 | 7.6378142 | ASIC1        | 0.176867595 |
| 14814 | 0.1429072 | 0.8095084 | EXPH5        | 0.176535761 |
| 14815 | 0.6364732 | 3.6053498 | TNFAIP8L3    | 0.17653576  |
| 14816 | 2.8836004 | 16.339057 | CTSC         | 0.176485119 |
| 14817 | 12.367142 | 70.109131 | LYAR         | 0.17639845  |
| 14818 | 0.01      | 0.0567581 | GRIK5        | 0.176186452 |
| 14819 | 1.60258   | 9.1133601 | PROB1        | 0.175849518 |
| 14820 | 0.01      | 0.0568702 | BCL6B        | 0.17583914  |
| 14821 | 8.844012  | 50.354807 | FAM60A       | 0.175633918 |
| 14822 | 0.01      | 0.0570042 | THSD7A       | 0.175425673 |
| 14823 | 0.01      | 0.0570957 | CNTN6        | 0.175144517 |
| 14824 | 0.01      | 0.0571011 | EYS          | 0.175127978 |
| 14825 | 2.554388  | 14.589379 | CADM1        | 0.175085444 |
| 14826 | 0.01      | 0.0571281 | UG0898H09    | 0.175045282 |
| 14827 | 8.3007646 | 47.437333 | RRAGA        | 0.174983798 |
| 14828 | 0.2073627 | 1.1855756 | SCO2         | 0.174904656 |
| 14829 | 2.0096384 | 11.491337 | FAM208A      | 0.174882904 |
| 14830 | 4.50269   | 25.765029 | NAA15        | 0.174759747 |
| 14831 | 612.88056 | 3507.2729 | RPS6         | 0.174745614 |
| 14832 | 0.01      | 0.0573068 | ANKRD20A4    | 0.174499507 |
| 14833 | 4.9756682 | 28.536758 | CEP170       | 0.17435997  |

|       |           |           |             |             |
|-------|-----------|-----------|-------------|-------------|
| 14834 | 0.01      | 0.0574866 | CLVS1       | 0.17395373  |
| 14835 | 0.7068173 | 4.0654957 | MAP3K9      | 0.173857595 |
| 14836 | 0.01      | 0.0575851 | SLC6A12     | 0.173656036 |
| 14837 | 0.01      | 0.0576345 | SCNN1A      | 0.173507188 |
| 14838 | 0.01      | 0.057684  | FBXW10      | 0.173358339 |
| 14839 | 20.380859 | 118.13018 | TARS        | 0.172528807 |
| 14840 | 0.0824039 | 0.4781681 | NOX1        | 0.172332529 |
| 14841 | 0.0756167 | 0.4387834 | EOMES       | 0.172332529 |
| 14842 | 0.1505777 | 0.8737623 | GNAT2       | 0.172332529 |
| 14843 | 0.1989494 | 1.1544507 | RTBDN       | 0.172332528 |
| 14844 | 0.021324  | 0.1237376 | PCDH19      | 0.172332528 |
| 14845 | 0.6340261 | 3.6790854 | SH3TC1      | 0.172332528 |
| 14846 | 0.5075178 | 2.9449914 | CWF19L2     | 0.172332528 |
| 14847 | 0.5051749 | 2.931396  | KIAA1211    | 0.172332528 |
| 14848 | 0.3994028 | 2.3176286 | ZNF721      | 0.172332528 |
| 14849 | 0.4797226 | 2.7837032 | SYT14       | 0.172332528 |
| 14850 | 0.1899722 | 1.1023583 | FABP3       | 0.172332528 |
| 14851 | 0.1509594 | 0.8759776 | NAP1L3      | 0.172332528 |
| 14852 | 0.1132298 | 0.6570427 | MYB         | 0.172332528 |
| 14853 | 0.8001687 | 4.6431671 | CXCL16      | 0.172332528 |
| 14854 | 0.1413837 | 0.8204119 | LTA         | 0.172332528 |
| 14855 | 0.120323  | 0.6982027 | WNT7A       | 0.172332528 |
| 14856 | 0.1819289 | 1.0556849 | ANKRD29     | 0.172332528 |
| 14857 | 0.1223002 | 0.7096755 | LOC440311   | 0.172332528 |
| 14858 | 0.0819825 | 0.4757227 | TTC3P1      | 0.172332528 |
| 14859 | 0.0893651 | 0.5185622 | MDH1B       | 0.172332527 |
| 14860 | 0.0496781 | 0.2882687 | WIPF3       | 0.172332527 |
| 14861 | 0.0755892 | 0.4386243 | CHRM3       | 0.172332527 |
| 14862 | 0.0251296 | 0.1458202 | TTC40       | 0.172332527 |
| 14863 | 0.0833265 | 0.4835214 | TMEFF1      | 0.172332527 |
| 14864 | 0.0546263 | 0.3169822 | GPR37       | 0.172332527 |
| 14865 | 0.0757541 | 0.4395809 | PA2G4P4     | 0.172332527 |
| 14866 | 0.0430845 | 0.2500077 | PLCH2       | 0.172332527 |
| 14867 | 0.01      | 0.058083  | ASIC2       | 0.172167555 |
| 14868 | 0.01      | 0.0582004 | PDE1B       | 0.171820243 |
| 14869 | 43.892992 | 256.12629 | SLC20A1     | 0.171372458 |
| 14870 | 1.9362961 | 11.322913 | RANBP6      | 0.171006893 |
| 14871 | 0.4527612 | 2.6481043 | N4BP2       | 0.170975579 |
| 14872 | 1.6267691 | 9.5233952 | MGA         | 0.170818183 |
| 14873 | 7.1861897 | 42.108374 | FKBP11      | 0.170659397 |
| 14874 | 5.614301  | 32.902463 | C9orf123    | 0.170634671 |
| 14875 | 0.01      | 0.0586919 | SLC26A8     | 0.170381378 |
| 14876 | 0.01      | 0.0588461 | COL18A1-AS1 | 0.169934834 |

|       |           |           |              |             |
|-------|-----------|-----------|--------------|-------------|
| 14877 | 0.6346607 | 3.7385675 | ANKRD34A     | 0.169760401 |
| 14878 | 0.01      | 0.0590011 | FAM133A      | 0.169488291 |
| 14879 | 2.1175843 | 12.499639 | TDRKH        | 0.169411638 |
| 14880 | 1.1271251 | 6.6551524 | ZNF488       | 0.169361278 |
| 14881 | 0.01      | 0.059053  | BHLHE22      | 0.169339441 |
| 14882 | 2.5323072 | 14.966424 | FRAT2        | 0.169199209 |
| 14883 | 0.01      | 0.0593661 | CYP4F11      | 0.168446353 |
| 14884 | 4.5235631 | 26.859481 | ARG2         | 0.16841588  |
| 14885 | 0.8387503 | 4.9829279 | WDR35        | 0.168324795 |
| 14886 | 17.796712 | 105.76529 | SUPT16H      | 0.168266097 |
| 14887 | 5.2913936 | 31.491851 | UBE4A        | 0.168024215 |
| 14888 | 3.2942337 | 19.646553 | NAA35        | 0.167674892 |
| 14889 | 0.2142558 | 1.2778051 | ADAMTS3      | 0.167674892 |
| 14890 | 0.01      | 0.059931  | ANKRD35      | 0.16685864  |
| 14891 | 2.2120617 | 13.286394 | SLC6A8       | 0.166490748 |
| 14892 | 26.31752  | 158.07197 | SIGMAR1      | 0.166490747 |
| 14893 | 1.037961  | 6.2460871 | RILP         | 0.166177795 |
| 14894 | 2.2564984 | 13.582011 | SC5D         | 0.166138759 |
| 14895 | 0.2545337 | 1.5385332 | RFX3         | 0.165439227 |
| 14896 | 0.2991023 | 1.8079283 | VILL         | 0.165439227 |
| 14897 | 8.293719  | 50.169832 | GNPNAT1      | 0.165312873 |
| 14898 | 0.01      | 0.0604976 | GPR158       | 0.165295737 |
| 14899 | 0.8196377 | 4.9607057 | RALGAPA1     | 0.165226032 |
| 14900 | 3.2527371 | 19.688339 | SMOC1        | 0.165211349 |
| 14901 | 0.4802997 | 2.9092909 | LRP4         | 0.165091666 |
| 14902 | 0.537944  | 3.2602818 | SP4          | 0.164999229 |
| 14903 | 2.7333798 | 16.582037 | DEPDC1B      | 0.164839809 |
| 14904 | 0.5769933 | 3.5003276 | FMNL1        | 0.164839809 |
| 14905 | 7.8287897 | 47.611556 | LAMB3        | 0.164430451 |
| 14906 | 22.437723 | 136.48942 | DDX21        | 0.164391664 |
| 14907 | 0.01      | 0.0610196 | TMC3         | 0.163881681 |
| 14908 | 0.8433633 | 5.1513827 | ZNF280C      | 0.163715902 |
| 14909 | 0.01      | 0.0611121 | LAX1         | 0.163633601 |
| 14910 | 1.6596092 | 10.14618  | SCAMP5       | 0.163569857 |
| 14911 | 2.7907533 | 17.071177 | CAAP1        | 0.163477497 |
| 14912 | 1.3421897 | 8.2157817 | DCUN1D5      | 0.163367252 |
| 14913 | 0.0707158 | 0.4331421 | TMTC1        | 0.163262396 |
| 14914 | 0.0812685 | 0.4977784 | SLC4A4       | 0.163262395 |
| 14915 | 2.5101653 | 15.375037 | UHRF2        | 0.163262395 |
| 14916 | 0.3727336 | 2.283034  | DISP2        | 0.163262395 |
| 14917 | 0.3575628 | 2.190111  | LOC100507032 | 0.163262395 |
| 14918 | 311.65112 | 1914.4295 | HMGA1        | 0.162790599 |
| 14919 | 2.766365  | 17.000026 | C5orf22      | 0.162727109 |

|       |           |           |           |             |
|-------|-----------|-----------|-----------|-------------|
| 14920 | 1.0355255 | 6.3844349 | LINC00622 | 0.162195321 |
| 14921 | 0.01      | 0.0617298 | MYH7B     | 0.161996274 |
| 14922 | 0.6786118 | 4.1918565 | MYO5B     | 0.161888132 |
| 14923 | 2.2781314 | 14.081527 | C1orf233  | 0.161781557 |
| 14924 | 0.156951  | 0.9714612 | NRXN2     | 0.161561745 |
| 14925 | 0.01      | 0.0619004 | KLHDC8A   | 0.16154973  |
| 14926 | 7.3725501 | 45.741784 | NRP2      | 0.161177582 |
| 14927 | 1.9001131 | 11.796477 | CHORDC1   | 0.161074624 |
| 14928 | 0.9238429 | 5.7370129 | ZYG11A    | 0.161032034 |
| 14929 | 11.896616 | 73.978253 | LPCAT1    | 0.160812345 |
| 14930 | 2.5525028 | 15.926341 | GALNT18   | 0.160269251 |
| 14931 | 13.240399 | 82.703934 | NRIP3     | 0.160093942 |
| 14932 | 1.1861618 | 7.4124427 | REEP2     | 0.160023062 |
| 14933 | 2.8225666 | 17.652498 | FBXO17    | 0.15989616  |
| 14934 | 0.9319655 | 5.8440735 | BIRC3     | 0.159471892 |
| 14935 | 0.1068441 | 0.6716539 | USP32P1   | 0.15907618  |
| 14936 | 0.1532349 | 0.9632802 | B3GNT3    | 0.15907618  |
| 14937 | 0.1477487 | 0.9287919 | ZNF815P   | 0.15907618  |
| 14938 | 0.1742471 | 1.0953687 | HNRNPH2   | 0.15907618  |
| 14939 | 0.2735799 | 1.7198044 | RASD2     | 0.15907618  |
| 14940 | 1.7586456 | 11.055367 | SNORD17   | 0.15907618  |
| 14941 | 0.1827264 | 1.1486725 | FAM106A   | 0.15907618  |
| 14942 | 0.223365  | 1.4041383 | CCDC181   | 0.15907618  |
| 14943 | 1.349261  | 8.4818547 | SLC45A3   | 0.15907618  |
| 14944 | 2.5209617 | 15.847512 | HIST3H2A  | 0.15907618  |
| 14945 | 0.2136335 | 1.3429636 | GTF2H2    | 0.159076179 |
| 14946 | 7.4428393 | 46.886498 | BIRC2     | 0.158741635 |
| 14947 | 0.01      | 0.0630428 | RAX       | 0.158622384 |
| 14948 | 0.01      | 0.0630625 | NAALAD2   | 0.158572769 |
| 14949 | 0.01      | 0.0631152 | CADM2     | 0.158440459 |
| 14950 | 0.8672684 | 5.4765755 | ALKBH8    | 0.15835962  |
| 14951 | 0.01      | 0.0632605 | TBR1      | 0.158076607 |
| 14952 | 0.1056793 | 0.6695942 | PURG      | 0.157825835 |
| 14953 | 1.9078037 | 12.101554 | LRP3      | 0.157649488 |
| 14954 | 0.01      | 0.0634597 | FLJ42289  | 0.157580447 |
| 14955 | 2.6818662 | 17.037881 | PTGS2     | 0.157406089 |
| 14956 | 0.01      | 0.0638214 | RPS16P5   | 0.156687358 |
| 14957 | 0.01      | 0.0639023 | OCA2      | 0.156488895 |
| 14958 | 0.3324135 | 2.1355759 | DOCK3     | 0.155655186 |
| 14959 | 0.01      | 0.0643717 | CRHR2     | 0.155347728 |
| 14960 | 1.8779857 | 12.108281 | TNFRSF21  | 0.155099275 |
| 14961 | 0.01      | 0.0647647 | UGT3A1    | 0.154405024 |
| 14962 | 0.6241375 | 4.0442365 | C9orf72   | 0.154327637 |

|       |           |           |              |             |
|-------|-----------|-----------|--------------|-------------|
| 14963 | 10.211277 | 66.173435 | SLCO4A1      | 0.154310826 |
| 14964 | 15.893837 | 103.32591 | PSIP1        | 0.153822371 |
| 14965 | 0.9655575 | 6.2772946 | SLC18A2      | 0.153817463 |
| 14966 | 0.01      | 0.0651626 | CLCN1        | 0.153462319 |
| 14967 | 4.0076827 | 26.148813 | NETO2        | 0.15326442  |
| 14968 | 0.4560164 | 2.9769102 | ATP1A1OS     | 0.153184469 |
| 14969 | 0.8028876 | 5.2413117 | CCNJ         | 0.153184469 |
| 14970 | 0.01      | 0.0654376 | C15orf54     | 0.15281731  |
| 14971 | 0.01      | 0.0656187 | GRM6         | 0.152395575 |
| 14972 | 0.01      | 0.0656864 | PEX5L        | 0.152238457 |
| 14973 | 0.3604281 | 2.370331  | EDARADD      | 0.152058113 |
| 14974 | 0.01      | 0.0657793 | FNDC7        | 0.152023456 |
| 14975 | 0.01      | 0.0658008 | AKNAD1       | 0.151973838 |
| 14976 | 0.01      | 0.0658438 | LOC100128770 | 0.151874606 |
| 14977 | 0.01      | 0.0659084 | SPARCL1      | 0.151725758 |
| 14978 | 1.2541235 | 8.2823135 | TNIK         | 0.151421887 |
| 14979 | 0.01      | 0.0661898 | LOC255167    | 0.151080751 |
| 14980 | 1.0074561 | 6.6811441 | CCNO         | 0.150790962 |
| 14981 | 0.01      | 0.0666054 | FMR1-AS1     | 0.150138047 |
| 14982 | 0.8914427 | 5.9391476 | MCIDAS       | 0.150096073 |
| 14983 | 0.01      | 0.0668484 | LINC00319    | 0.14959227  |
| 14984 | 0.01      | 0.0671826 | ASZ1         | 0.148848029 |
| 14985 | 1.6174798 | 10.867776 | TIGD1        | 0.148832638 |
| 14986 | 0.01      | 0.067205  | PCDP1        | 0.148798415 |
| 14987 | 0.01      | 0.067205  | LOC286177    | 0.148798415 |
| 14988 | 0.01      | 0.0675881 | LRRN4        | 0.147954941 |
| 14989 | 0.0547411 | 0.3705897 | SYT2         | 0.147713596 |
| 14990 | 0.0884924 | 0.5990807 | LOC285768    | 0.147713596 |
| 14991 | 0.1159708 | 0.7851057 | PAR-SN       | 0.147713596 |
| 14992 | 0.2202955 | 1.4913688 | SYCE2        | 0.147713596 |
| 14993 | 0.079059  | 0.5352181 | GLS2         | 0.147713596 |
| 14994 | 0.2702476 | 1.8295377 | SDK2         | 0.147713596 |
| 14995 | 0.0492554 | 0.3334519 | KBTBD3       | 0.147713595 |
| 14996 | 0.2864598 | 1.939292  | SP9          | 0.147713595 |
| 14997 | 0.5552385 | 3.7588852 | RGCC         | 0.147713595 |
| 14998 | 0.148475  | 1.0051546 | SLC2A13      | 0.147713595 |
| 14999 | 0.1211625 | 0.8202529 | TMEM74B      | 0.147713595 |
| 15000 | 0.260956  | 1.7666353 | KIAA0226L    | 0.147713595 |
| 15001 | 0.2348163 | 1.5896732 | NUP62CL      | 0.147713595 |
| 15002 | 0.1705397 | 1.1545294 | C2orf27A     | 0.147713595 |
| 15003 | 0.1806671 | 1.2230905 | ANKRD19P     | 0.147713595 |
| 15004 | 0.0958159 | 0.6486597 | TXNDC2       | 0.147713595 |
| 15005 | 0.1104103 | 0.7474622 | SLC19A3      | 0.147713595 |

|       |           |           |           |             |
|-------|-----------|-----------|-----------|-------------|
| 15006 | 0.0948996 | 0.6424567 | FAM131B   | 0.147713595 |
| 15007 | 0.0812791 | 0.5502476 | CNKSRI    | 0.147713595 |
| 15008 | 0.0995698 | 0.6740731 | LOC494141 | 0.147713595 |
| 15009 | 0.0808063 | 0.5470473 | APCDD1    | 0.147713595 |
| 15010 | 0.0664327 | 0.4497402 | SYT16     | 0.147713595 |
| 15011 | 0.0321208 | 0.217453  | JAKMIP3   | 0.147713594 |
| 15012 | 0.0107795 | 0.0729755 | GPR98     | 0.14771359  |
| 15013 | 0.01      | 0.0678156 | CTAGE10P  | 0.147458782 |
| 15014 | 5.1212074 | 34.742149 | FMNL2     | 0.147406179 |
| 15015 | 0.01      | 0.0679298 | SIGLEC8   | 0.147210702 |
| 15016 | 0.01      | 0.0680215 | PRSS30P   | 0.147012238 |
| 15017 | 1.146138  | 7.7974134 | PLEKHG5   | 0.146989509 |
| 15018 | 0.01      | 0.0681365 | ZCCHC16   | 0.146764158 |
| 15019 | 0.01      | 0.0683677 | SSTR5-AS1 | 0.146267998 |
| 15020 | 0.01      | 0.0684605 | VAV1      | 0.146069533 |
| 15021 | 0.4373037 | 3.0074755 | PLCG2     | 0.14540557  |
| 15022 | 0.01      | 0.0688582 | FAM163A   | 0.145226062 |
| 15023 | 0.01      | 0.0688817 | CCDC135   | 0.145176444 |
| 15024 | 0.01      | 0.0692366 | C7orf65   | 0.144432205 |
| 15025 | 0.01      | 0.0692366 | GPR116    | 0.144432205 |
| 15026 | 0.01      | 0.0694274 | LINC00312 | 0.144035277 |
| 15027 | 1.004413  | 6.9877441 | TUB       | 0.143739239 |
| 15028 | 0.01      | 0.0697156 | SLC35F3   | 0.143439886 |
| 15029 | 1.0201909 | 7.1285434 | ABCA2     | 0.143113518 |
| 15030 | 0.01      | 0.0698848 | C1orf145  | 0.143092573 |
| 15031 | 0.01      | 0.0700062 | GRHL3     | 0.142844493 |
| 15032 | 0.01      | 0.0700549 | TTLL2     | 0.142745261 |
| 15033 | 0.1968819 | 1.3804647 | SLCO2A1   | 0.142620024 |
| 15034 | 1.0240762 | 7.1804516 | HMX2      | 0.142620023 |
| 15035 | 4.5085004 | 31.611974 | DDX20     | 0.142620023 |
| 15036 | 4.8434557 | 34.055509 | SLC35F2   | 0.142222384 |
| 15037 | 0.01      | 0.070336  | CHRNA2    | 0.142174676 |
| 15038 | 0.4140844 | 2.9145345 | INSR      | 0.142075672 |
| 15039 | 0.01      | 0.0703974 | LINC00167 | 0.142050636 |
| 15040 | 0.2396183 | 1.6883936 | GPR63     | 0.141920906 |
| 15041 | 0.01      | 0.0704959 | BTN1A1    | 0.141852173 |
| 15042 | 0.01      | 0.0704959 | TRIM55    | 0.141852173 |
| 15043 | 0.8580265 | 6.0527811 | ATR       | 0.141757402 |
| 15044 | 0.01      | 0.0705453 | ASIC4     | 0.14175294  |
| 15045 | 22.884725 | 161.48133 | SCD       | 0.141717468 |
| 15046 | 0.807437  | 5.7005009 | MGC21881  | 0.141643174 |
| 15047 | 1.3012457 | 9.1964676 | TBX1      | 0.141494076 |
| 15048 | 2.2269913 | 15.756553 | MAPK12    | 0.141337469 |

|       |           |           |           |             |
|-------|-----------|-----------|-----------|-------------|
| 15049 | 0.1570062 | 1.113524  | CASZ1     | 0.140999341 |
| 15050 | 0.1419293 | 1.0065954 | PDE8B     | 0.140999341 |
| 15051 | 2.7143206 | 19.25059  | CNIH2     | 0.140999341 |
| 15052 | 0.2954624 | 2.095488  | FAM86HP   | 0.140999341 |
| 15053 | 0.1055187 | 0.7483633 | ITGB4     | 0.140999341 |
| 15054 | 0.0878335 | 0.6229352 | DRP2      | 0.14099934  |
| 15055 | 0.01      | 0.0710176 | CCDC144NL | 0.140810237 |
| 15056 | 0.01      | 0.071168  | SULT1C2   | 0.140512541 |
| 15057 | 6.0913263 | 43.37292  | DEAF1     | 0.14044077  |
| 15058 | 1.3425141 | 9.5880046 | WDHD1     | 0.140020179 |
| 15059 | 0.01      | 0.0717763 | TF        | 0.139321756 |
| 15060 | 0.3052514 | 2.1930295 | PCDH1     | 0.139191657 |
| 15061 | 0.01      | 0.0718787 | DENND1C   | 0.139123292 |
| 15062 | 0.1855289 | 1.3375626 | SVEP1     | 0.138706669 |
| 15063 | 0.01      | 0.072136  | AICDA     | 0.138627132 |
| 15064 | 0.01      | 0.072136  | MBP       | 0.138627132 |
| 15065 | 2.1085126 | 15.270213 | TPD52     | 0.1380801   |
| 15066 | 2.1802912 | 15.795041 | DICER1    | 0.138036438 |
| 15067 | 0.01      | 0.0725253 | C1orf127  | 0.137882891 |
| 15068 | 0.1055989 | 0.7659533 | CHST1     | 0.137866023 |
| 15069 | 0.3714786 | 2.6944899 | FHIT      | 0.137866022 |
| 15070 | 0.6315136 | 4.5806329 | SNHG10    | 0.137866022 |
| 15071 | 0.3208614 | 2.3273423 | CCDC15    | 0.137866022 |
| 15072 | 0.3051237 | 2.2131901 | DPYSL4    | 0.137866022 |
| 15073 | 0.1803544 | 1.3081859 | LOC440028 | 0.137866022 |
| 15074 | 0.3541198 | 2.5685792 | CDKL1     | 0.137866022 |
| 15075 | 0.0773713 | 0.5612062 | PDE7B     | 0.137866022 |
| 15076 | 0.01      | 0.0727872 | P2RY13    | 0.137386731 |
| 15077 | 0.5584814 | 4.0716737 | CHST15    | 0.137162624 |
| 15078 | 3.7804898 | 27.573817 | TAF1D     | 0.137104332 |
| 15079 | 0.01      | 0.0730246 | KCNJ1     | 0.136940188 |
| 15080 | 0.2837684 | 2.0857348 | PTPN22    | 0.136051996 |
| 15081 | 0.1778153 | 1.3069656 | ZSWIM5    | 0.136051996 |
| 15082 | 0.2385525 | 1.7533924 | IL17RD    | 0.136051996 |
| 15083 | 0.01      | 0.0735576 | ABCC6P1   | 0.135947868 |
| 15084 | 0.01      | 0.0736382 | FOLH1     | 0.13579902  |
| 15085 | 0.5190523 | 3.8276521 | CDK18     | 0.135605924 |
| 15086 | 0.01      | 0.073773  | C20orf197 | 0.135550939 |
| 15087 | 0.01      | 0.0738271 | LRRIQ1    | 0.135451708 |
| 15088 | 0.01      | 0.0738271 | ADPGK-AS1 | 0.135451708 |
| 15089 | 0.5455484 | 4.0450266 | TPPP3     | 0.134868935 |
| 15090 | 0.01      | 0.0743719 | TDGF1P3   | 0.134459388 |
| 15091 | 0.01      | 0.0745645 | NAALADL1  | 0.134112076 |

|       |           |           |              |             |
|-------|-----------|-----------|--------------|-------------|
| 15092 | 0.01      | 0.0747027 | RASSF10      | 0.133863995 |
| 15093 | 4.5882194 | 34.296311 | TTF2         | 0.133781721 |
| 15094 | 1.6789053 | 12.573322 | SPOCK1       | 0.133529177 |
| 15095 | 0.01      | 0.0749388 | GOLGA6C      | 0.13344226  |
| 15096 | 0.455518  | 3.4141985 | HOXB5        | 0.133418731 |
| 15097 | 0.01      | 0.0750923 | LOC145820    | 0.133169372 |
| 15098 | 0.7191701 | 5.4096431 | MGC57346     | 0.132942236 |
| 15099 | 0.01      | 0.0752606 | LOC283856    | 0.132871675 |
| 15100 | 0.3378721 | 2.5487568 | ATP6V0E2-AS1 | 0.132563483 |
| 15101 | 0.01      | 0.0756561 | CD226        | 0.13217705  |
| 15102 | 0.972052  | 7.3572526 | SALL2        | 0.132121605 |
| 15103 | 0.01      | 0.0757272 | KCNJ10       | 0.132053011 |
| 15104 | 0.01      | 0.0757414 | LOC653786    | 0.132028203 |
| 15105 | 0.01      | 0.0757699 | LOC643387    | 0.131978587 |
| 15106 | 0.01      | 0.0758269 | CLDN10       | 0.131879355 |
| 15107 | 1.5692733 | 11.913785 | LEPREL2      | 0.13171913  |
| 15108 | 0.2488564 | 1.8910153 | ZNF268       | 0.131599385 |
| 15109 | 0.01      | 0.0760271 | CASC1        | 0.131532042 |
| 15110 | 5.805     | 44.164616 | RAC3         | 0.131440064 |
| 15111 | 0.01      | 0.0761996 | TMPRSS11B    | 0.131234347 |
| 15112 | 0.7120285 | 5.4364641 | RAB6B        | 0.130972721 |
| 15113 | 109.67384 | 839.07062 | S100A16      | 0.13070871  |
| 15114 | 0.6907607 | 5.2863104 | FBXO41       | 0.130669719 |
| 15115 | 0.01      | 0.0766342 | FAM24B-CUZD1 | 0.130490107 |
| 15116 | 0.01      | 0.0766342 | RBPJL        | 0.130490107 |
| 15117 | 0.01      | 0.0767217 | ZIM3         | 0.130341258 |
| 15118 | 0.01      | 0.0768387 | DACH1        | 0.130142794 |
| 15119 | 0.01      | 0.0771918 | MAOB         | 0.129547402 |
| 15120 | 0.0563699 | 0.4361328 | GPM6A        | 0.129249397 |
| 15121 | 0.051141  | 0.3956768 | C3orf72      | 0.129249397 |
| 15122 | 0.0655757 | 0.5073577 | HSPA12B      | 0.129249397 |
| 15123 | 0.057937  | 0.4482577 | KCNB2        | 0.129249396 |
| 15124 | 0.3544209 | 2.7421476 | LOC257396    | 0.129249396 |
| 15125 | 0.2484644 | 1.922364  | PRKG1        | 0.129249396 |
| 15126 | 0.0515203 | 0.3986113 | ZMAT1        | 0.129249396 |
| 15127 | 0.1090241 | 0.843517  | LRRN1        | 0.129249396 |
| 15128 | 1.6409409 | 12.695927 | SNORA40      | 0.129249396 |
| 15129 | 0.03225   | 0.2495176 | MUC20        | 0.129249396 |
| 15130 | 0.1219424 | 0.9434656 | KCNJ11       | 0.129249396 |
| 15131 | 0.1795    | 1.3887879 | LOC644656    | 0.129249396 |
| 15132 | 0.1524503 | 1.1795046 | C15orf59     | 0.129249396 |
| 15133 | 0.104776  | 0.81065   | CXCL14       | 0.129249396 |
| 15134 | 0.0889836 | 0.688464  | KBTBD8       | 0.129249396 |



|       |           |           |           |             |
|-------|-----------|-----------|-----------|-------------|
| 15135 | 0.136031  | 1.0524692 | CN5H6.4   | 0.129249396 |
| 15136 | 0.0854096 | 0.6608126 | RGS7      | 0.129249396 |
| 15137 | 0.0691668 | 0.535142  | POU2F3    | 0.129249395 |
| 15138 | 0.0609355 | 0.471457  | DLL4      | 0.129249395 |
| 15139 | 0.0549142 | 0.4248703 | CD1D      | 0.129249395 |
| 15140 | 0.0614929 | 0.4757695 | GRM2      | 0.129249395 |
| 15141 | 0.0441244 | 0.3413895 | KGFLP2    | 0.129249395 |
| 15142 | 0.0348378 | 0.2695391 | KCNA6     | 0.129249395 |
| 15143 | 0.01      | 0.0774439 | MRC1      | 0.129125667 |
| 15144 | 0.01      | 0.077608  | SCNN1B    | 0.128852779 |
| 15145 | 0.9479508 | 7.3825283 | SIM2      | 0.128404629 |
| 15146 | 4.8027171 | 37.530112 | DROSHA    | 0.127969699 |
| 15147 | 0.01      | 0.0781799 | DNAJB7    | 0.127910074 |
| 15148 | 0.01      | 0.0783166 | EFCAB5    | 0.127686802 |
| 15149 | 0.01      | 0.0784538 | SND1-IT1  | 0.127463529 |
| 15150 | 0.01      | 0.0789352 | PKDREJ    | 0.126686212 |
| 15151 | 0.01      | 0.0789455 | CHIT1     | 0.126669674 |
| 15152 | 0.1274355 | 1.0065068 | IKZF3     | 0.126611653 |
| 15153 | 1.5955891 | 12.608502 | ERMP1     | 0.126548662 |
| 15154 | 0.01      | 0.0791937 | CSDC2     | 0.126272746 |
| 15155 | 0.01      | 0.0792248 | TDRD10    | 0.126223129 |
| 15156 | 0.01      | 0.0792559 | ANKK1     | 0.126173513 |
| 15157 | 0.4146795 | 3.2974885 | TNFRSF19  | 0.125756169 |
| 15158 | 0.01      | 0.0797262 | CATSPERD  | 0.125429274 |
| 15159 | 0.0999518 | 0.7974915 | NTRK2     | 0.125332748 |
| 15160 | 1.0738783 | 8.5682177 | BMP6      | 0.125332748 |
| 15161 | 0.01      | 0.0798842 | FAM129C   | 0.125181194 |
| 15162 | 0.01      | 0.0798842 | KPRP      | 0.125181194 |
| 15163 | 0.01      | 0.0800111 | GABRA6    | 0.124982729 |
| 15164 | 0.01      | 0.0800746 | EPHA1-AS1 | 0.124883498 |
| 15165 | 1.0563335 | 8.4647177 | LOC441454 | 0.12479252  |
| 15166 | 0.01      | 0.0801383 | CDRT4     | 0.124784265 |
| 15167 | 0.01      | 0.080266  | CLEC19A   | 0.1245858   |
| 15168 | 0.01      | 0.080282  | SIDT1     | 0.124560993 |
| 15169 | 4.9637688 | 39.852372 | CLMP      | 0.124553911 |
| 15170 | 0.2491823 | 2.0082488 | SHC2      | 0.12407942  |
| 15171 | 0.6360107 | 5.1258354 | CALHM2    | 0.12407942  |
| 15172 | 0.1506502 | 1.2141437 | ITGA7     | 0.12407942  |
| 15173 | 0.1486268 | 1.1978358 | TMEM170B  | 0.12407942  |
| 15174 | 0.1332762 | 1.0741198 | KIF27     | 0.12407942  |
| 15175 | 0.3883703 | 3.1550539 | KIAA1958  | 0.123094663 |
| 15176 | 0.9477012 | 7.6989628 | LAT2      | 0.123094663 |
| 15177 | 0.01      | 0.0812693 | MMP28     | 0.123047705 |

|       |           |           |                |             |
|-------|-----------|-----------|----------------|-------------|
| 15178 | 0.01      | 0.0813349 | PNPLA1         | 0.122948473 |
| 15179 | 3.7471556 | 30.47842  | RCL1           | 0.122944547 |
| 15180 | 1.1188582 | 9.1035267 | LTBP2          | 0.122903818 |
| 15181 | 7.3910645 | 60.172456 | IGF2BP1        | 0.122831359 |
| 15182 | 9.7446063 | 79.592738 | KRT8           | 0.122430846 |
| 15183 | 0.01      | 0.0818302 | SLC28A2        | 0.122204233 |
| 15184 | 0.01      | 0.0819633 | FLJ38576       | 0.122005768 |
| 15185 | 0.01      | 0.0821303 | SLC2A5         | 0.121757689 |
| 15186 | 0.2121115 | 1.7436709 | CCNA1          | 0.121646491 |
| 15187 | 0.1985703 | 1.6323551 | C9orf43        | 0.121646491 |
| 15188 | 0.330968  | 2.7207359 | ZDHHC23        | 0.121646491 |
| 15189 | 1.1680495 | 9.6019993 | STK32C         | 0.12164649  |
| 15190 | 0.3990416 | 3.2803383 | DOC2A          | 0.12164649  |
| 15191 | 0.7913905 | 6.5056584 | ULBP1          | 0.12164649  |
| 15192 | 0.5860091 | 4.8173123 | PKP3           | 0.12164649  |
| 15193 | 0.1111464 | 0.9136836 | EFR3B          | 0.12164649  |
| 15194 | 0.1043041 | 0.8574358 | KIAA1407       | 0.12164649  |
| 15195 | 0.0866346 | 0.7121832 | ANO1           | 0.12164649  |
| 15196 | 0.01      | 0.0822644 | ZAP70          | 0.121559225 |
| 15197 | 0.01      | 0.0822644 | KRT6A          | 0.121559225 |
| 15198 | 0.01      | 0.0822644 | FA2H           | 0.121559225 |
| 15199 | 0.01      | 0.082399  | SRD5A2         | 0.121360761 |
| 15200 | 0.01      | 0.0824327 | PLIN5          | 0.121311145 |
| 15201 | 1.0415241 | 8.6076773 | MPP6           | 0.120999435 |
| 15202 | 0.01      | 0.0828052 | DGCR9          | 0.120765368 |
| 15203 | 0.01      | 0.0829074 | AGAP7          | 0.12061652  |
| 15204 | 0.01      | 0.0829415 | LRRC25         | 0.120566904 |
| 15205 | 0.01      | 0.0831468 | CLEC4M         | 0.120269208 |
| 15206 | 0.01      | 0.0832498 | DCST2          | 0.12012036  |
| 15207 | 0.01      | 0.0833187 | LHX3           | 0.120021128 |
| 15208 | 0.01      | 0.0834221 | LRRC36         | 0.11987228  |
| 15209 | 0.01      | 0.0835258 | ZNF664-FAM101A | 0.119723432 |
| 15210 | 0.4101199 | 3.4280699 | GPC6           | 0.119635805 |
| 15211 | 0.6198413 | 5.1810685 | EPB41L4A       | 0.119635805 |
| 15212 | 0.01      | 0.0838037 | CSNK1A1L       | 0.119326504 |
| 15213 | 0.2655898 | 2.226102  | TNFRSF11B      | 0.119307135 |
| 15214 | 0.01      | 0.0841536 | HSD17B13       | 0.118830343 |
| 15215 | 0.7852608 | 6.6240343 | TAF4B          | 0.118547217 |
| 15216 | 0.01      | 0.0843885 | DISC1          | 0.118499571 |
| 15217 | 0.01      | 0.0844179 | RBFOX1         | 0.118458225 |
| 15218 | 0.01      | 0.0845419 | RGS11          | 0.118284568 |
| 15219 | 0.01      | 0.0847196 | FLJ41941       | 0.118036488 |
| 15220 | 0.01      | 0.0847552 | ALDH1A1        | 0.117986872 |

|       |           |           |              |             |
|-------|-----------|-----------|--------------|-------------|
| 15221 | 0.01      | 0.0849696 | LOC100996455 | 0.117689176 |
| 15222 | 0.01      | 0.0850054 | TAF7L        | 0.11763956  |
| 15223 | 0.01      | 0.0851491 | ZNF730       | 0.117441096 |
| 15224 | 0.01      | 0.0853564 | MAP2         | 0.117155804 |
| 15225 | 0.01      | 0.0854016 | CYP4F2       | 0.117093784 |
| 15226 | 0.01      | 0.0858381 | RNF144A-AS1  | 0.116498392 |
| 15227 | 0.01      | 0.0859113 | PIFO         | 0.11639916  |
| 15228 | 0.7837842 | 6.7379138 | FAM72D       | 0.116324456 |
| 15229 | 0.01      | 0.0859846 | VSX1         | 0.116299928 |
| 15230 | 0.6320883 | 5.4406304 | NIPAL4       | 0.116179232 |
| 15231 | 0.01      | 0.0865012 | WBP2NL       | 0.115605303 |
| 15232 | 0.01      | 0.0865012 | MEOX1        | 0.115605303 |
| 15233 | 0.01      | 0.0865012 | TRIM34       | 0.115605303 |
| 15234 | 0.01      | 0.0865384 | FBLN7        | 0.115555687 |
| 15235 | 0.01      | 0.0866127 | NME8         | 0.115456455 |
| 15236 | 1.265387  | 10.966989 | HMHA1        | 0.115381435 |
| 15237 | 0.01      | 0.0866872 | RERG         | 0.115357223 |
| 15238 | 0.01      | 0.0867619 | SLC7A4       | 0.115257991 |
| 15239 | 0.01      | 0.0867992 | CTSE         | 0.115208375 |
| 15240 | 0.01      | 0.0868741 | KRT5         | 0.115109143 |
| 15241 | 0.01      | 0.0869303 | TMEM151B     | 0.115034719 |
| 15242 | 0.01      | 0.0870241 | GRID2IP      | 0.114910679 |
| 15243 | 0.0415304 | 0.3614848 | MIR17HG      | 0.114888353 |
| 15244 | 0.0605285 | 0.526846  | CHRNA7       | 0.114888353 |
| 15245 | 0.0541438 | 0.4712732 | EIF5AL1      | 0.114888353 |
| 15246 | 0.058605  | 0.5101042 | ACAD11       | 0.114888352 |
| 15247 | 0.0707398 | 0.6157266 | FAM83A       | 0.114888352 |
| 15248 | 0.1894885 | 1.6493277 | C11orf92     | 0.114888352 |
| 15249 | 0.1016583 | 0.8848442 | HCLS1        | 0.114888352 |
| 15250 | 0.1700526 | 1.4801555 | RHOF         | 0.114888352 |
| 15251 | 0.0827968 | 0.7206717 | KCNK13       | 0.114888352 |
| 15252 | 0.3407076 | 2.9655542 | SRGAP2B      | 0.114888352 |
| 15253 | 0.1305761 | 1.136548  | ZNF391       | 0.114888352 |
| 15254 | 0.6291306 | 5.476017  | RAD51B       | 0.114888352 |
| 15255 | 0.4575638 | 3.982682  | MTSS1        | 0.114888352 |
| 15256 | 0.1461427 | 1.2720411 | ACER2        | 0.114888352 |
| 15257 | 0.3837928 | 3.3405721 | CNFN         | 0.114888352 |
| 15258 | 0.142026  | 1.236209  | ADAM11       | 0.114888352 |
| 15259 | 0.2111444 | 1.8378223 | TMEM52       | 0.114888352 |
| 15260 | 0.0857788 | 0.7466271 | USP32P2      | 0.114888352 |
| 15261 | 0.0812791 | 0.7074612 | FGFBP3       | 0.114888352 |
| 15262 | 0.0298524 | 0.2598382 | KLHL3        | 0.114888352 |
| 15263 | 0.0981627 | 0.8544186 | FUT1         | 0.114888352 |

|       |           |           |               |             |
|-------|-----------|-----------|---------------|-------------|
| 15264 | 0.0379115 | 0.3299856 | SYCP2         | 0.114888351 |
| 15265 | 0.0450594 | 0.3922012 | LGR5          | 0.114888351 |
| 15266 | 0.01      | 0.087137  | PCDH15        | 0.114761832 |
| 15267 | 2.089218  | 18.223625 | MTMR12        | 0.114643388 |
| 15268 | 0.01      | 0.0873636 | LOC100133161  | 0.114464134 |
| 15269 | 0.01      | 0.0874394 | LOC644172     | 0.114364903 |
| 15270 | 0.01      | 0.0875344 | RPH3A         | 0.114240863 |
| 15271 | 0.01      | 0.0876486 | IGSF1         | 0.114092015 |
| 15272 | 1.4676021 | 12.910635 | FKBP5         | 0.113673887 |
| 15273 | 0.01      | 0.0880698 | ATG9B         | 0.113546239 |
| 15274 | 0.01      | 0.0881276 | MINOS1P1      | 0.113471815 |
| 15275 | 0.01      | 0.0881469 | RNF43         | 0.113447006 |
| 15276 | 5.1691782 | 45.632056 | RAI14         | 0.113279537 |
| 15277 | 1.571979  | 13.899852 | FAM195A       | 0.113093222 |
| 15278 | 0.01      | 0.0887094 | CD200R1       | 0.112727574 |
| 15279 | 0.01      | 0.0887876 | MATN4         | 0.112628343 |
| 15280 | 0.01      | 0.0887876 | DYDC2         | 0.112628343 |
| 15281 | 0.01      | 0.0888659 | PRKG1-AS1     | 0.11252911  |
| 15282 | 0.01      | 0.0888659 | DES           | 0.11252911  |
| 15283 | 0.01      | 0.0889443 | FLJ42393      | 0.112429879 |
| 15284 | 0.01      | 0.0890229 | LOC100506025  | 0.112330646 |
| 15285 | 0.01      | 0.0890819 | LOC440905     | 0.112256223 |
| 15286 | 0.01      | 0.0891805 | PALM3         | 0.112132183 |
| 15287 | 0.01      | 0.0892199 | LOC440040     | 0.112082567 |
| 15288 | 0.5772839 | 5.153578  | ENDOD1        | 0.112016143 |
| 15289 | 0.01      | 0.0893584 | FAM20A        | 0.111908911 |
| 15290 | 0.2146789 | 1.920492  | RPS6KA5       | 0.111783262 |
| 15291 | 3.4182531 | 30.579293 | TRIB1         | 0.111783261 |
| 15292 | 1.335181  | 11.944373 | PDIA5         | 0.111783261 |
| 15293 | 0.9581586 | 8.5715751 | PTGR2         | 0.111783261 |
| 15294 | 0.01      | 0.0894973 | SHANK2-AS1    | 0.111735254 |
| 15295 | 0.01      | 0.0896167 | COL6A4P1      | 0.111586406 |
| 15296 | 0.7040524 | 6.3226883 | IL17RB        | 0.111353326 |
| 15297 | 0.01      | 0.0902184 | CNPY1         | 0.110842166 |
| 15298 | 0.01      | 0.0902318 | CD93          | 0.110825628 |
| 15299 | 0.2160327 | 1.9500137 | ZNF595        | 0.110785197 |
| 15300 | 0.2573186 | 2.3226806 | ADAMTS6       | 0.110785197 |
| 15301 | 1.0144621 | 9.1803783 | AP1G2         | 0.1105033   |
| 15302 | 0.01      | 0.0906648 | TFAMP1        | 0.11029639  |
| 15303 | 0.01      | 0.0906648 | ACVR1C        | 0.11029639  |
| 15304 | 0.4675054 | 4.2431126 | FAM117B       | 0.110179813 |
| 15305 | 0.01      | 0.0908692 | SLX1A-SULT1A3 | 0.11004831  |
| 15306 | 0.4614692 | 4.1951943 | OVGP1         | 0.109999486 |

|       |           |           |              |             |
|-------|-----------|-----------|--------------|-------------|
| 15307 | 0.01      | 0.0909923 | AMY2B        | 0.109899462 |
| 15308 | 0.01      | 0.0909923 | RBMXL2       | 0.109899462 |
| 15309 | 1.9286597 | 17.560238 | KCNMA1       | 0.109831066 |
| 15310 | 0.01      | 0.0913635 | CCKBR        | 0.109452918 |
| 15311 | 0.2141824 | 1.9678361 | DMKN         | 0.108841597 |
| 15312 | 0.1974415 | 1.8140261 | IGFBP5       | 0.108841597 |
| 15313 | 0.288842  | 2.6537832 | KHDC1        | 0.108841597 |
| 15314 | 0.1375347 | 1.2636229 | SORCS2       | 0.108841596 |
| 15315 | 0.01      | 0.0919051 | FOXH1        | 0.10880791  |
| 15316 | 0.01      | 0.0922838 | SMIM5        | 0.108361366 |
| 15317 | 0.5373639 | 4.9607417 | CREB5        | 0.108323303 |
| 15318 | 0.01      | 0.0924002 | COL19A1      | 0.108224922 |
| 15319 | 0.01      | 0.0926231 | LOC100505782 | 0.107964437 |
| 15320 | 0.01      | 0.0926657 | IL9R         | 0.107914822 |
| 15321 | 0.2857724 | 2.6486119 | CACNG8       | 0.107895148 |
| 15322 | 0.01      | 0.0927083 | KCNV2        | 0.107865206 |
| 15323 | 0.01      | 0.0928792 | TLX2         | 0.107666742 |
| 15324 | 0.01      | 0.0930937 | RSPO3        | 0.107418661 |
| 15325 | 0.01      | 0.0932444 | PRH2         | 0.107245006 |
| 15326 | 0.01      | 0.0934245 | CNTN5        | 0.107038273 |
| 15327 | 0.103151  | 0.9643438 | MYH3         | 0.106965018 |
| 15328 | 0.154599  | 1.4453233 | EPHB6        | 0.106965018 |
| 15329 | 0.2600659 | 2.4313176 | PLEKHN1      | 0.106965017 |
| 15330 | 0.1933803 | 1.8078836 | THBS4        | 0.106965017 |
| 15331 | 0.01      | 0.0935257 | PHYHD1       | 0.106922502 |
| 15332 | 11.732555 | 109.78046 | DUSP6        | 0.106872886 |
| 15333 | 2.1664882 | 20.3079   | LOXL1-AS1    | 0.106682041 |
| 15334 | 0.01      | 0.0937432 | LOC100129931 | 0.106674421 |
| 15335 | 0.01      | 0.0938305 | DCTN1-AS1    | 0.106575189 |
| 15336 | 0.01      | 0.0938742 | KRT4         | 0.106525573 |
| 15337 | 0.01      | 0.0941372 | LOC399753    | 0.106227877 |
| 15338 | 0.7747193 | 7.3051729 | HRASLS       | 0.106050787 |
| 15339 | 0.833598  | 7.860366  | CRIP2        | 0.106050787 |
| 15340 | 5.1456667 | 48.520778 | FRMD4A       | 0.106050787 |
| 15341 | 0.01      | 0.0943355 | LOC100133331 | 0.106004605 |
| 15342 | 0.8718815 | 8.2405224 | KIAA1671     | 0.105804157 |
| 15343 | 9.9685379 | 94.330495 | IPO7         | 0.105676726 |
| 15344 | 0.01      | 0.094653  | PCDHA9       | 0.105649024 |
| 15345 | 0.2237487 | 2.1206452 | FGFR2        | 0.105509711 |
| 15346 | 0.01      | 0.094846  | EIF1B-AS1    | 0.105434021 |
| 15347 | 1.1670956 | 11.146153 | LOC202181    | 0.104708371 |
| 15348 | 0.01      | 0.0957472 | FEZF1        | 0.104441701 |
| 15349 | 2.0969763 | 20.087184 | SIMC1        | 0.104393743 |

|       |           |           |           |             |
|-------|-----------|-----------|-----------|-------------|
| 15350 | 0.01      | 0.0958838 | LOC146513 | 0.104292853 |
| 15351 | 0.01      | 0.0958838 | TREM1     | 0.104292853 |
| 15352 | 0.01      | 0.0959295 | ELAVL4    | 0.104243237 |
| 15353 | 81.8161   | 786.24019 | KRT18     | 0.104059932 |
| 15354 | 0.01      | 0.0962042 | FEZF2     | 0.103945541 |
| 15355 | 0.01      | 0.0964344 | WDR65     | 0.103697461 |
| 15356 | 0.01      | 0.0964344 | LOC400685 | 0.103697461 |
| 15357 | 0.01      | 0.0964575 | CCDC177   | 0.103672652 |
| 15358 | 0.01      | 0.0966193 | CCDC37    | 0.103498997 |
| 15359 | 0.050338  | 0.4868305 | INPP4B    | 0.103399518 |
| 15360 | 0.1273836 | 1.2319551 | NECAB2    | 0.103399517 |
| 15361 | 0.0553518 | 0.5353196 | NFATC2    | 0.103399517 |
| 15362 | 0.0975197 | 0.9431345 | CERS1     | 0.103399517 |
| 15363 | 0.1493903 | 1.4447874 | PSD       | 0.103399517 |
| 15364 | 0.222649  | 2.153289  | DDN       | 0.103399517 |
| 15365 | 1.1431679 | 11.055834 | VLDLR     | 0.103399517 |
| 15366 | 0.1530099 | 1.4797933 | FBXO16    | 0.103399517 |
| 15367 | 0.5112007 | 4.9439374 | APOE      | 0.103399517 |
| 15368 | 0.1148207 | 1.1104565 | KLRG1     | 0.103399517 |
| 15369 | 0.1744659 | 1.6872988 | DLL3      | 0.103399517 |
| 15370 | 0.1216576 | 1.1765782 | SNAI3     | 0.103399517 |
| 15371 | 0.0860089 | 0.8318112 | FAM189A2  | 0.103399516 |
| 15372 | 0.01      | 0.0972252 | SOAT2     | 0.102853988 |
| 15373 | 0.01      | 0.0974446 | CCSER1    | 0.102622447 |
| 15374 | 0.4060785 | 3.9665496 | CGN       | 0.102375759 |
| 15375 | 0.01      | 0.0982202 | FADS6     | 0.101812053 |
| 15376 | 0.2419031 | 2.3784907 | GAREML    | 0.101704443 |
| 15377 | 0.01      | 0.0985805 | KLHL23    | 0.101439933 |
| 15378 | 1.0650741 | 10.529473 | SIGIRR    | 0.101151701 |
| 15379 | 0.01      | 0.0990407 | LINC00330 | 0.10096858  |
| 15380 | 0.7690018 | 7.6231197 | ITPRIPL1  | 0.100877577 |
| 15381 | 0.5670735 | 5.6214025 | PLA2G4A   | 0.100877577 |
| 15382 | 0.01      | 0.0993336 | SLC5A4    | 0.100670884 |
| 15383 | 0.01      | 0.0996282 | FAM133DP  | 0.100373189 |
| 15384 | 0.01      | 0.0997762 | NRK       | 0.10022434  |
| 15385 | 0.4676129 | 4.6731363 | CPNE7     | 0.100064049 |
| 15386 | 0.1602251 | 1.6012258 | ELOVL7    | 0.100064048 |
| 15387 | 0.4416803 | 4.4139762 | COL9A2    | 0.100064048 |
| 15388 | 3.9777602 | 39.792593 | MLL       | 0.099962326 |
| 15389 | 0.01      | 0.1000734 | SRPK3     | 0.099926644 |
| 15390 | 0.01      | 0.1002476 | EXTL1     | 0.099752988 |
| 15391 | 0.01      | 0.1002726 | RAD21-AS1 | 0.09972818  |
| 15392 | 0.3901699 | 3.9149242 | ARHGAP44  | 0.099662185 |

|       |           |           |              |             |
|-------|-----------|-----------|--------------|-------------|
| 15393 | 0.01      | 0.1004725 | DNAJC5G      | 0.099529716 |
| 15394 | 0.01      | 0.1005226 | KRT32        | 0.0994801   |
| 15395 | 0.3672885 | 3.694215  | PID1         | 0.099422612 |
| 15396 | 0.01      | 0.1010772 | GDF7         | 0.098934324 |
| 15397 | 0.01      | 0.1012295 | LOC100506071 | 0.098785476 |
| 15398 | 0.0704767 | 0.7156755 | MEGF11       | 0.098475731 |
| 15399 | 0.1628121 | 1.6533222 | NXPH2        | 0.098475731 |
| 15400 | 0.1005304 | 1.0208646 | C1orf226     | 0.098475731 |
| 15401 | 0.7011759 | 7.1202916 | PDZRN3       | 0.09847573  |
| 15402 | 0.2246289 | 2.2810589 | CHDH         | 0.09847573  |
| 15403 | 0.1232768 | 1.25185   | MAPK8IP2     | 0.09847573  |
| 15404 | 0.8063076 | 8.2178735 | PROSER2      | 0.09811633  |
| 15405 | 0.01      | 0.1020495 | CYP8B1       | 0.09799162  |
| 15406 | 0.01      | 0.102153  | CLEC4D       | 0.097892388 |
| 15407 | 0.01      | 0.1022048 | ZP1          | 0.097842771 |
| 15408 | 0.01      | 0.1022566 | DHH          | 0.097793156 |
| 15409 | 0.5959948 | 6.1002327 | SLC37A2      | 0.097700331 |
| 15410 | 0.1198111 | 1.2282438 | HSD3BP4      | 0.097546714 |
| 15411 | 0.01      | 0.1030408 | ATP6V1B1     | 0.097048915 |
| 15412 | 0.01      | 0.1031199 | NCKAP1L      | 0.096974492 |
| 15413 | 0.1953135 | 2.0148488 | MAN1C1       | 0.096937047 |
| 15414 | 0.48465   | 4.9996365 | CTXN1        | 0.096937047 |
| 15415 | 0.01      | 0.1033932 | MYOM1        | 0.096718143 |
| 15416 | 0.01      | 0.103748  | CCDC144A     | 0.096387369 |
| 15417 | 0.4389668 | 4.563748  | OLFM2        | 0.096185597 |
| 15418 | 0.01      | 0.1040515 | FAM154A      | 0.096106212 |
| 15419 | 0.01      | 0.1041053 | NPY5R        | 0.096056595 |
| 15420 | 0.01      | 0.104213  | FAM225A      | 0.095957363 |
| 15421 | 0.01      | 0.1042669 | PLK5         | 0.095907747 |
| 15422 | 0.01      | 0.1043749 | TESPA1       | 0.095808515 |
| 15423 | 0.2917126 | 3.0469159 | ARMC4        | 0.095740293 |
| 15424 | 0.01      | 0.1045644 | EGFEM1P      | 0.09563486  |
| 15425 | 0.01      | 0.1046458 | LOC100129617 | 0.095560435 |
| 15426 | 0.01      | 0.1047002 | C9orf153     | 0.09551082  |
| 15427 | 0.01      | 0.1047546 | BEST2        | 0.095461204 |
| 15428 | 0.01      | 0.1047546 | FLT3         | 0.095461204 |
| 15429 | 0.1590369 | 1.668227  | ANK3         | 0.095332888 |
| 15430 | 0.01      | 0.1049182 | FTCD         | 0.095312355 |
| 15431 | 0.01      | 0.1049455 | CAPN14       | 0.095287547 |
| 15432 | 0.01      | 0.1052469 | MATN1        | 0.095014659 |
| 15433 | 0.01      | 0.1053019 | CXCR3        | 0.094965043 |
| 15434 | 0.01      | 0.1054948 | ASXL3        | 0.094791387 |
| 15435 | 0.0407747 | 0.4337754 | SLC8A2       | 0.093999562 |

|       |           |           |              |             |
|-------|-----------|-----------|--------------|-------------|
| 15436 | 0.0342706 | 0.3645825 | SCN3B        | 0.093999561 |
| 15437 | 0.1219424 | 1.2972653 | DHRS2        | 0.093999561 |
| 15438 | 0.2648024 | 2.8170601 | DLK2         | 0.093999561 |
| 15439 | 0.1182073 | 1.2575305 | LOC348761    | 0.093999561 |
| 15440 | 0.1148207 | 1.2215021 | TUBAL3       | 0.093999561 |
| 15441 | 0.0676402 | 0.7195801 | CCDC64       | 0.09399956  |
| 15442 | 0.0549142 | 0.5841967 | RHPN1        | 0.09399956  |
| 15443 | 0.0183515 | 0.1952295 | WNK3         | 0.09399956  |
| 15444 | 0.01      | 0.1064139 | PSMB11       | 0.093972723 |
| 15445 | 0.01      | 0.1069787 | SSUH2        | 0.093476563 |
| 15446 | 0.01      | 0.1070355 | SFRP5        | 0.093426947 |
| 15447 | 0.01      | 0.1072634 | SLC9B1       | 0.093228482 |
| 15448 | 0.01      | 0.1075495 | TREH         | 0.092980403 |
| 15449 | 0.01      | 0.107607  | LOC401980    | 0.092930787 |
| 15450 | 0.1387876 | 1.4956457 | LAMA3        | 0.092794438 |
| 15451 | 0.01      | 0.1078373 | NOXRED1      | 0.092732323 |
| 15452 | 0.01      | 0.1078373 | OTOP1        | 0.092732323 |
| 15453 | 0.01      | 0.1081555 | LOC286184    | 0.092459435 |
| 15454 | 0.01      | 0.1083008 | TMIE         | 0.092335395 |
| 15455 | 0.01      | 0.1083591 | SLC22A31     | 0.092285778 |
| 15456 | 83.009202 | 901.72966 | PHGDH        | 0.092055531 |
| 15457 | 0.01      | 0.1087391 | ANKRD20A5P   | 0.091963274 |
| 15458 | 0.01      | 0.1090627 | RPL13AP17    | 0.091690386 |
| 15459 | 0.01      | 0.10924   | PMFBP1       | 0.091541538 |
| 15460 | 0.4089773 | 4.4744463 | AFF3         | 0.091402888 |
| 15461 | 0.01      | 0.1094179 | PMCHL2       | 0.09139269  |
| 15462 | 0.01      | 0.1094774 | SLC15A2      | 0.091343074 |
| 15463 | 0.1898568 | 2.0809678 | STAC2        | 0.091234868 |
| 15464 | 0.01      | 0.1099252 | CXorf22      | 0.090970954 |
| 15465 | 0.01      | 0.1101957 | MKX          | 0.090747682 |
| 15466 | 0.2604343 | 2.871339  | SLC16A9      | 0.090701331 |
| 15467 | 0.01      | 0.1103163 | SMAD5-AS1    | 0.09064845  |
| 15468 | 0.01      | 0.1104372 | PCDHAC1      | 0.090549218 |
| 15469 | 1.2540451 | 13.892248 | MMP3         | 0.090269419 |
| 15470 | 0.01      | 0.1111375 | TMED7-TICAM2 | 0.089978634 |
| 15471 | 0.01      | 0.1111681 | LOC285847    | 0.089953826 |
| 15472 | 0.1682677 | 1.8714576 | CRHR1-IT1    | 0.089912624 |
| 15473 | 0.1671207 | 1.8587011 | LINC00565    | 0.089912623 |
| 15474 | 0.7573926 | 8.4518247 | C11orf82     | 0.089612915 |
| 15475 | 0.01      | 0.111599  | MYBPH        | 0.089606514 |
| 15476 | 0.01      | 0.1117228 | TINAG        | 0.089507282 |
| 15477 | 0.01      | 0.1118468 | CAPN6        | 0.08940805  |
| 15478 | 0.01      | 0.1119089 | GFI1B        | 0.089358434 |



|       |           |           |              |             |
|-------|-----------|-----------|--------------|-------------|
| 15479 | 1.3424006 | 15.040884 | HAUS6        | 0.089250109 |
| 15480 | 0.01      | 0.1125966 | FAM74A2      | 0.088812658 |
| 15481 | 0.01      | 0.1127225 | LOC100130855 | 0.088713426 |
| 15482 | 0.01      | 0.1127225 | DUSP13       | 0.088713426 |
| 15483 | 0.7219382 | 8.1456982 | FAM131C      | 0.088628157 |
| 15484 | 0.01      | 0.112912  | C10orf111    | 0.088564578 |
| 15485 | 4.9990079 | 56.560242 | WDR3         | 0.088383778 |
| 15486 | 0.9090963 | 10.299288 | B4GALT6      | 0.08826788  |
| 15487 | 0.01      | 0.1134841 | CYP2A13      | 0.088118034 |
| 15488 | 0.01      | 0.1134841 | BEST3        | 0.088118034 |
| 15489 | 0.1672213 | 1.9002505 | ZNF521       | 0.087999589 |
| 15490 | 0.4359822 | 4.9543665 | SYT17        | 0.087999589 |
| 15491 | 0.01      | 0.1138045 | AGBL3        | 0.087869954 |
| 15492 | 0.01      | 0.1139332 | SERPINI2     | 0.087770722 |
| 15493 | 0.01      | 0.114321  | LOC283585    | 0.087473026 |
| 15494 | 0.01      | 0.1144508 | FLJ40292     | 0.087373794 |
| 15495 | 0.01      | 0.1147114 | CA14         | 0.08717533  |
| 15496 | 0.01      | 0.1149731 | LINC00222    | 0.086976865 |
| 15497 | 1.6938745 | 19.50463  | AK5          | 0.086844739 |
| 15498 | 0.01      | 0.1152525 | TCHH         | 0.086765997 |
| 15499 | 0.01      | 0.1153548 | P2RY2        | 0.086689093 |
| 15500 | 1.2447069 | 14.359424 | SLC22A17     | 0.08668223  |
| 15501 | 0.01      | 0.115401  | GP5          | 0.086654362 |
| 15502 | 2.1523642 | 24.856752 | UCP2         | 0.086590728 |
| 15503 | 0.01      | 0.1155333 | CDHR5        | 0.086555129 |
| 15504 | 0.01      | 0.1156327 | CBWD3        | 0.086480706 |
| 15505 | 0.01      | 0.1160322 | LOC100507250 | 0.086183009 |
| 15506 | 0.01      | 0.1160322 | SIGLEC9      | 0.086183009 |
| 15507 | 0.01      | 0.1160322 | LOC407835    | 0.086183009 |
| 15508 | 0.0332429 | 0.385799  | FAM83B       | 0.086166265 |
| 15509 | 0.0629036 | 0.7300254 | CCDC147      | 0.086166264 |
| 15510 | 0.0644003 | 0.7473962 | LINGO2       | 0.086166264 |
| 15511 | 0.1228408 | 1.4256258 | PDGFB        | 0.086166264 |
| 15512 | 0.2158835 | 2.505429  | PHACTR1      | 0.086166264 |
| 15513 | 0.9821742 | 11.398593 | FAM69B       | 0.086166264 |
| 15514 | 0.2651393 | 3.0770664 | CBWD5        | 0.086166264 |
| 15515 | 0.0461265 | 0.5353196 | FLJ22184     | 0.086166264 |
| 15516 | 0.1213212 | 1.4079896 | ST6GAL2      | 0.086166264 |
| 15517 | 0.2579202 | 2.9932849 | PRKAG2-AS1   | 0.086166264 |
| 15518 | 0.0221137 | 0.2566399 | MYO15B       | 0.086166264 |
| 15519 | 0.1145682 | 1.3296175 | LOC100129794 | 0.086166264 |
| 15520 | 0.0446538 | 0.5182289 | ADAM22       | 0.086166264 |
| 15521 | 0.0517891 | 0.6010373 | FLRT3        | 0.086166264 |

|       |           |           |               |             |
|-------|-----------|-----------|---------------|-------------|
| 15522 | 0.0719612 | 0.835143  | DMBX1         | 0.086166264 |
| 15523 | 0.0341751 | 0.3966176 | ADCY5         | 0.086166263 |
| 15524 | 0.01      | 0.1166365 | LINC00086     | 0.085736465 |
| 15525 | 0.01      | 0.1173154 | KRT37         | 0.085240305 |
| 15526 | 0.01      | 0.1175892 | RDH8          | 0.085041841 |
| 15527 | 0.7764172 | 9.1431962 | BRSK2         | 0.084917478 |
| 15528 | 13.108284 | 154.38393 | TMEM158       | 0.084907049 |
| 15529 | 0.01      | 0.1178642 | TMEM40        | 0.084843377 |
| 15530 | 0.445679  | 5.2585195 | FBXO27        | 0.084753702 |
| 15531 | 0.8647282 | 10.202837 | LOC100287036  | 0.084753702 |
| 15532 | 0.01      | 0.1182099 | C12orf50      | 0.084595297 |
| 15533 | 1.4658191 | 17.333708 | SACS          | 0.084564661 |
| 15534 | 0.01      | 0.1184182 | KCNH8         | 0.084446449 |
| 15535 | 0.01      | 0.118453  | ATP2C2        | 0.084421641 |
| 15536 | 0.01      | 0.1185576 | XKR3          | 0.084347217 |
| 15537 | 0.01      | 0.1185924 | ENKUR         | 0.084322409 |
| 15538 | 0.3627844 | 4.3272362 | ALDH5A1       | 0.083837446 |
| 15539 | 0.01      | 0.1193297 | KPNA7         | 0.083801441 |
| 15540 | 0.01      | 0.1194004 | CASP12        | 0.083751825 |
| 15541 | 0.01      | 0.119542  | TCTE1         | 0.083652593 |
| 15542 | 0.7954179 | 9.5109324 | COCH          | 0.083631962 |
| 15543 | 0.01      | 0.1202553 | GPR18         | 0.083156433 |
| 15544 | 0.01      | 0.1203271 | LOC100507244  | 0.083106817 |
| 15545 | 0.01      | 0.120399  | LOC729121     | 0.083057201 |
| 15546 | 0.01      | 0.1204709 | KCNA3         | 0.083007585 |
| 15547 | 0.01      | 0.1204709 | CYP2D6        | 0.083007585 |
| 15548 | 0.6566485 | 7.9215323 | VASH1         | 0.082894127 |
| 15549 | 0.1687104 | 2.0395451 | LRCH2         | 0.082719614 |
| 15550 | 0.4424618 | 5.3489344 | SATB1         | 0.082719614 |
| 15551 | 0.01      | 0.1209771 | CKM           | 0.082660273 |
| 15552 | 1.422081  | 17.254096 | STK32B        | 0.082419905 |
| 15553 | 0.01      | 0.1214876 | AK7           | 0.082312961 |
| 15554 | 0.1056793 | 1.2848602 | FZD3          | 0.082249616 |
| 15555 | 0.01      | 0.1216158 | SEMA3E        | 0.082226132 |
| 15556 | 0.01      | 0.1217076 | DKFZp686K1684 | 0.082164113 |
| 15557 | 0.2949328 | 3.5939752 | AIF1L         | 0.082063109 |
| 15558 | 0.01      | 0.1219285 | ALDH1L1       | 0.082015265 |
| 15559 | 0.01      | 0.1220762 | LOC401127     | 0.081916032 |
| 15560 | 0.01      | 0.1222985 | LOC441204     | 0.081767184 |
| 15561 | 0.01      | 0.1223727 | FBP1          | 0.081717569 |
| 15562 | 0.01      | 0.1225712 | EFCAB6        | 0.081585259 |
| 15563 | 0.01      | 0.122596  | MLXIPL        | 0.08156872  |
| 15564 | 0.01      | 0.1226706 | STAC3         | 0.081519105 |

|       |           |           |               |             |
|-------|-----------|-----------|---------------|-------------|
| 15565 | 0.7557552 | 9.2733937 | MPP2          | 0.081497156 |
| 15566 | 0.01      | 0.122945  | LOC619207     | 0.081337179 |
| 15567 | 0.01      | 0.1230075 | POTEJ         | 0.081295832 |
| 15568 | 0.01      | 0.1231453 | SSC5D         | 0.08120487  |
| 15569 | 0.01      | 0.1232709 | DKFZp434J0226 | 0.081122176 |
| 15570 | 0.01      | 0.1236869 | ADCYAP1       | 0.080849288 |
| 15571 | 0.3930583 | 4.8657345 | BHMT2         | 0.080780872 |
| 15572 | 0.01      | 0.1238009 | RRN3P1        | 0.080774864 |
| 15573 | 0.01      | 0.1241058 | EBF2          | 0.0805764   |
| 15574 | 0.1999995 | 2.4822751 | DAAM2         | 0.080571052 |
| 15575 | 0.01      | 0.1241823 | TMEM179       | 0.080526784 |
| 15576 | 0.01      | 0.1244123 | SDS           | 0.080377936 |
| 15577 | 0.01      | 0.1247974 | KLF1          | 0.080129856 |
| 15578 | 0.01      | 0.1248748 | ZNF890P       | 0.08008024  |
| 15579 | 0.01      | 0.1249522 | LOC344967     | 0.080030624 |
| 15580 | 0.01      | 0.1254187 | ODF3L2        | 0.079732928 |
| 15581 | 0.1069264 | 1.3443417 | GBGT1         | 0.07953809  |
| 15582 | 0.0610784 | 0.7679138 | DIRAS1        | 0.07953809  |
| 15583 | 0.0432364 | 0.5435938 | PLEKHA7       | 0.07953809  |
| 15584 | 0.098674  | 1.2405881 | LOC399815     | 0.07953809  |
| 15585 | 0.1200689 | 1.5095767 | MPP7          | 0.07953809  |
| 15586 | 0.1203925 | 1.5136465 | HHIPL1        | 0.07953809  |
| 15587 | 0.0683277 | 0.8590564 | ZNF680        | 0.07953809  |
| 15588 | 0.1336108 | 1.6798346 | SLC25A53      | 0.07953809  |
| 15589 | 0.1371952 | 1.7248993 | ASGR1         | 0.07953809  |
| 15590 | 0.0808063 | 1.0159449 | TSPAN12       | 0.07953809  |
| 15591 | 0.0576167 | 0.7243909 | FAM5B         | 0.079538089 |
| 15592 | 0.0579854 | 0.7290267 | SLC5A5        | 0.079538089 |
| 15593 | 0.0503137 | 0.6325741 | ANO4          | 0.079538089 |
| 15594 | 0.01      | 0.1260462 | DLK1          | 0.079336    |
| 15595 | 0.01      | 0.1263623 | CD2           | 0.079137536 |
| 15596 | 0.01      | 0.1263623 | CES1P2        | 0.079137536 |
| 15597 | 0.01      | 0.1264416 | AHSG          | 0.07908792  |
| 15598 | 0.01      | 0.1266402 | SIGLEC11      | 0.07896388  |
| 15599 | 0.01      | 0.1267597 | GPR115        | 0.078889456 |
| 15600 | 0.01      | 0.1273202 | FAM83C        | 0.078542144 |
| 15601 | 0.01      | 0.1273202 | GSTM5         | 0.078542144 |
| 15602 | 0.6608864 | 8.4155814 | NOG           | 0.078531279 |
| 15603 | 0.01      | 0.1275619 | SAMD13        | 0.078393296 |
| 15604 | 3.7303013 | 47.62109  | FAM162A       | 0.078332967 |
| 15605 | 0.01      | 0.1278857 | TPO           | 0.078194832 |
| 15606 | 0.01      | 0.1280482 | AMN           | 0.078095599 |
| 15607 | 0.1458104 | 1.8684688 | XDH           | 0.078037371 |

|       |           |           |             |             |
|-------|-----------|-----------|-------------|-------------|
| 15608 | 0.01      | 0.1282111 | CD53        | 0.077996368 |
| 15609 | 0.01      | 0.1286202 | NPSR1       | 0.077748288 |
| 15610 | 0.7807662 | 10.067954 | DNAJA4      | 0.077549638 |
| 15611 | 0.01      | 0.1291973 | RPA4        | 0.077400976 |
| 15612 | 0.3683271 | 4.7733142 | TRPV2       | 0.077163819 |
| 15613 | 0.01      | 0.1304348 | CACNA1D     | 0.076666659 |
| 15614 | 0.01      | 0.1304939 | RSPO1       | 0.076631927 |
| 15615 | 0.07779   | 1.0156386 | CACNA2D2    | 0.076592235 |
| 15616 | 0.01      | 0.1307055 | HLA-DQA1    | 0.076507887 |
| 15617 | 0.331553  | 4.3466214 | CORO2A      | 0.076278332 |
| 15618 | 0.329833  | 4.3417939 | ACVR2B      | 0.075966992 |
| 15619 | 0.9532541 | 12.555584 | FBLN2       | 0.075922722 |
| 15620 | 0.3406612 | 4.4889079 | EGFLAM      | 0.075889554 |
| 15621 | 0.01      | 0.1318168 | EGOT        | 0.075862879 |
| 15622 | 0.01      | 0.1326409 | SDR16C5     | 0.075391527 |
| 15623 | 0.01      | 0.1331228 | RNF224      | 0.075118639 |
| 15624 | 4.9801351 | 66.318134 | CRABP2      | 0.075094621 |
| 15625 | 0.3233314 | 4.3056528 | ELFN2       | 0.075094621 |
| 15626 | 0.01      | 0.1332988 | INSM2       | 0.075019407 |
| 15627 | 0.01      | 0.1334754 | SERPINA6    | 0.074920175 |
| 15628 | 0.01      | 0.1335196 | LINC00696   | 0.074895367 |
| 15629 | 0.01      | 0.1335638 | ACTA1       | 0.074870559 |
| 15630 | 3.4546512 | 46.142899 | KIAA0020    | 0.074868535 |
| 15631 | 0.01      | 0.134097  | LOC728024   | 0.074572863 |
| 15632 | 0.01      | 0.1341863 | OR6W1P      | 0.074523247 |
| 15633 | 0.01      | 0.1343652 | SIX6        | 0.074424015 |
| 15634 | 0.01      | 0.1347245 | APITD1-CORT | 0.074225551 |
| 15635 | 0.0385711 | 0.5222413 | ZNF91       | 0.073856798 |
| 15636 | 0.0681936 | 0.9233213 | PPM1L       | 0.073856798 |
| 15637 | 0.0479189 | 0.6488089 | SPNS2       | 0.073856798 |
| 15638 | 0.052666  | 0.7130831 | FAM78A      | 0.073856798 |
| 15639 | 0.206234  | 2.7923502 | GPR160      | 0.073856798 |
| 15640 | 0.3034944 | 4.109228  | F12         | 0.073856798 |
| 15641 | 0.5175484 | 7.0074583 | LHX2        | 0.073856798 |
| 15642 | 0.3211086 | 4.3477194 | HOXD4       | 0.073856798 |
| 15643 | 1.9611642 | 26.553604 | RBPM2       | 0.073856798 |
| 15644 | 0.1994254 | 2.7001625 | LINC00189   | 0.073856798 |
| 15645 | 0.8097115 | 10.963263 | PHKA1       | 0.073856798 |
| 15646 | 0.1043041 | 1.4122472 | SBSN        | 0.073856798 |
| 15647 | 0.1103811 | 1.4945285 | TMEM150C    | 0.073856798 |
| 15648 | 0.1719468 | 2.3281104 | NUDT7       | 0.073856798 |
| 15649 | 0.0350251 | 0.4742302 | KIAA1045    | 0.073856798 |
| 15650 | 0.0628088 | 0.8504129 | CHRNA3      | 0.073856797 |

|       |           |           |              |             |
|-------|-----------|-----------|--------------|-------------|
| 15651 | 0.5830644 | 7.9538835 | CYFIP2       | 0.073305628 |
| 15652 | 0.01      | 0.1366889 | EXD1         | 0.073158807 |
| 15653 | 0.01      | 0.1367121 | FGD5         | 0.073146403 |
| 15654 | 0.1471748 | 2.0211719 | KIAA1199     | 0.072816561 |
| 15655 | 0.01      | 0.1375753 | KCNE1L       | 0.072687455 |
| 15656 | 0.01      | 0.1378105 | ANKRD18DP    | 0.072563415 |
| 15657 | 0.200336  | 2.7609294 | ZFYVE28      | 0.072561064 |
| 15658 | 0.01      | 0.1382991 | LOC100505676 | 0.072307065 |
| 15659 | 0.01      | 0.1383307 | P2RX3        | 0.072290526 |
| 15660 | 0.01      | 0.1384257 | LOC644936    | 0.072240911 |
| 15661 | 0.01      | 0.1386638 | C19orf21     | 0.07211687  |
| 15662 | 0.01      | 0.1389027 | DUOXA2       | 0.071992831 |
| 15663 | 0.01      | 0.1389985 | CACNA1G-AS1  | 0.071943215 |
| 15664 | 0.01      | 0.1390465 | POLN         | 0.071918407 |
| 15665 | 0.01      | 0.1390944 | KCNK12       | 0.071893599 |
| 15666 | 0.01      | 0.1390944 | GAL3ST2      | 0.071893599 |
| 15667 | 0.01      | 0.1391905 | NOTO         | 0.071843983 |
| 15668 | 0.01      | 0.1392867 | EYA1         | 0.071794366 |
| 15669 | 0.01      | 0.1392867 | PACSIN1      | 0.071794366 |
| 15670 | 0.2472117 | 3.4496412 | C3orf70      | 0.071663031 |
| 15671 | 0.01      | 0.1397212 | ARX          | 0.071571095 |
| 15672 | 0.1430333 | 2.0034577 | KCNN2        | 0.071393215 |
| 15673 | 0.1430333 | 2.0057953 | RNFT2        | 0.071310012 |
| 15674 | 0.01      | 0.1403537 | INHA         | 0.07124859  |
| 15675 | 0.01      | 0.1408441 | RBM44        | 0.07100051  |
| 15676 | 0.3199817 | 4.509296  | PCSK6        | 0.070960453 |
| 15677 | 0.01      | 0.1411894 | LPAR5        | 0.070826854 |
| 15678 | 1.2065742 | 17.036814 | GPHN         | 0.070821587 |
| 15679 | 0.01      | 0.1418352 | BOLL         | 0.07050435  |
| 15680 | 0.379829  | 5.3876703 | CEND1        | 0.070499671 |
| 15681 | 0.3132885 | 4.4539287 | KCNQ5        | 0.070339807 |
| 15682 | 0.01      | 0.1428404 | PRRG2        | 0.07000819  |
| 15683 | 1.2541595 | 17.991734 | ZIC2         | 0.069707539 |
| 15684 | 0.01      | 0.1436037 | AQP1         | 0.06963607  |
| 15685 | 0.01      | 0.1438087 | ADH6         | 0.069536838 |
| 15686 | 0.01      | 0.1441687 | ST8SIA6      | 0.069363182 |
| 15687 | 0.01      | 0.144427  | PRR23C       | 0.069239142 |
| 15688 | 0.01      | 0.1445133 | CR2          | 0.069197795 |
| 15689 | 0.01      | 0.1447381 | LOC401242    | 0.069090294 |
| 15690 | 0.01      | 0.1450332 | G6PC         | 0.068949715 |
| 15691 | 0.1796547 | 2.6062222 | DEF6         | 0.068933011 |
| 15692 | 0.0972466 | 1.4107409 | EFNA2        | 0.068933011 |
| 15693 | 2.1708281 | 31.491851 | CRIP1        | 0.068933011 |

|       |           |           |           |             |
|-------|-----------|-----------|-----------|-------------|
| 15694 | 0.4463882 | 6.4756805 | SLC4A11   | 0.068933011 |
| 15695 | 0.1032703 | 1.4981257 | DPY19L2P4 | 0.068933011 |
| 15696 | 0.1287742 | 1.8681057 | TMTC2     | 0.068933011 |
| 15697 | 0.01      | 0.1452772 | LOC730668 | 0.068833945 |
| 15698 | 0.01      | 0.1456271 | FAM3B     | 0.068668558 |
| 15699 | 0.3758897 | 5.4832647 | KIF21A    | 0.068552166 |
| 15700 | 3.0223042 | 44.203823 | SFRP1     | 0.06837201  |
| 15701 | 0.01      | 0.1462611 | CEACAM21  | 0.068370862 |
| 15702 | 0.01      | 0.1466869 | SERHL2    | 0.068172398 |
| 15703 | 0.01      | 0.1469008 | KCNQ4     | 0.068073166 |
| 15704 | 0.01      | 0.1470079 | SRRM2-AS1 | 0.06802355  |
| 15705 | 0.01      | 0.1471958 | KANK4     | 0.067936721 |
| 15706 | 0.01      | 0.1472765 | LOC283177 | 0.067899509 |
| 15707 | 0.01      | 0.147546  | EMR4P     | 0.06777547  |
| 15708 | 0.4783096 | 7.0775351 | JAM2      | 0.067581384 |
| 15709 | 0.01      | 0.148306  | RDH5      | 0.067428158 |
| 15710 | 0.01      | 0.1484589 | TLL2      | 0.067358695 |
| 15711 | 0.01      | 0.1489086 | DDX43     | 0.06715527  |
| 15712 | 0.01      | 0.1493224 | TMEM215   | 0.066969209 |
| 15713 | 0.01      | 0.1496272 | ACPT      | 0.066832765 |
| 15714 | 0.01      | 0.1496642 | VWA5B2    | 0.066816227 |
| 15715 | 0.3126774 | 4.6871592 | LOC401074 | 0.066709366 |
| 15716 | 0.5158403 | 7.7326526 | RAMP2     | 0.066709366 |
| 15717 | 0.01      | 0.1502967 | LPPR5     | 0.06653507  |
| 15718 | 0.01      | 0.1504088 | STL       | 0.066485453 |
| 15719 | 0.01      | 0.1504088 | EPO       | 0.066485453 |
| 15720 | 0.01      | 0.1504463 | ZBTB8B    | 0.066468915 |
| 15721 | 0.01      | 0.1507463 | SSTR5     | 0.066336605 |
| 15722 | 0.01      | 0.1510853 | TMEM191B  | 0.066187757 |
| 15723 | 0.01      | 0.1513501 | NLGN3     | 0.066071987 |
| 15724 | 0.0680451 | 1.0309914 | ZFHX2     | 0.065999691 |
| 15725 | 3.7106111 | 56.425253 | ITGA2     | 0.065761533 |
| 15726 | 0.01      | 0.1523415 | BTC       | 0.065641981 |
| 15727 | 0.01      | 0.1525722 | WTAPP1    | 0.065542749 |
| 15728 | 0.01      | 0.1528035 | HES5      | 0.065443517 |
| 15729 | 0.2001916 | 3.0762453 | PRKAA2    | 0.065076619 |
| 15730 | 0.01      | 0.153736  | SHBG      | 0.065046589 |
| 15731 | 0.01      | 0.1538794 | CSRNP3    | 0.064985947 |
| 15732 | 0.01      | 0.1545612 | C6orf163  | 0.064699277 |
| 15733 | 0.0248627 | 0.3847251 | MGAT4A    | 0.064624699 |
| 15734 | 0.0412264 | 0.6379358 | PPFIA4    | 0.064624699 |
| 15735 | 0.0591204 | 0.9148271 | SRCIN1    | 0.064624698 |
| 15736 | 0.1798098 | 2.7823689 | DNAAF3    | 0.064624698 |

|       |           |           |           |             |
|-------|-----------|-----------|-----------|-------------|
| 15737 | 0.1903192 | 2.9449914 | RNF208    | 0.064624698 |
| 15738 | 0.0488742 | 0.7562771 | GNG7      | 0.064624698 |
| 15739 | 0.01      | 0.1551562 | CCDC160   | 0.064451197 |
| 15740 | 0.01      | 0.1551562 | SFTPD     | 0.064451197 |
| 15741 | 0.01      | 0.1555153 | ASTL      | 0.064302349 |
| 15742 | 0.01      | 0.1555453 | KCTD16    | 0.064289945 |
| 15743 | 0.01      | 0.1556955 | TBX21     | 0.064227925 |
| 15744 | 0.01      | 0.1560572 | LOC728613 | 0.064079077 |
| 15745 | 2.5222955 | 39.389807 | GRB10     | 0.064034219 |
| 15746 | 0.01      | 0.1561781 | ALOX5     | 0.064029461 |
| 15747 | 0.01      | 0.1562992 | LINC00552 | 0.063979845 |
| 15748 | 0.01      | 0.1567246 | VSTM2A    | 0.063806189 |
| 15749 | 0.01      | 0.1569687 | TMEM252   | 0.063706957 |
| 15750 | 0.01      | 0.1573118 | NCAN      | 0.063568032 |
| 15751 | 0.7329799 | 11.535432 | KCTD12    | 0.063541603 |
| 15752 | 0.01      | 0.1575824 | DNASE2B   | 0.063458877 |
| 15753 | 0.2951834 | 4.6628161 | SLC10A4   | 0.063305827 |
| 15754 | 0.01      | 0.1579776 | PTPRO     | 0.063300105 |
| 15755 | 1.698909  | 26.886323 | THBD      | 0.063188594 |
| 15756 | 0.1463223 | 2.3349408 | EYA4      | 0.062666374 |
| 15757 | 0.5873718 | 9.3729974 | FAM196B   | 0.062666374 |
| 15758 | 0.0998201 | 1.592882  | IRAK3     | 0.062666374 |
| 15759 | 0.01      | 0.1595787 | PIH1D2    | 0.06266502  |
| 15760 | 0.01      | 0.1599586 | GPR151    | 0.062516173 |
| 15761 | 0.01      | 0.160468  | NHLH2     | 0.062317709 |
| 15762 | 0.01      | 0.160468  | TBC1D21   | 0.062317709 |
| 15763 | 0.01      | 0.1606599 | LOC728084 | 0.062243285 |
| 15764 | 0.01      | 0.1609807 | LOC284379 | 0.062119244 |
| 15765 | 0.01      | 0.1613674 | ODF3L1    | 0.061970396 |
| 15766 | 0.01      | 0.1616262 | C22orf24  | 0.061871164 |
| 15767 | 0.01      | 0.1622769 | RSPH6A    | 0.061623084 |
| 15768 | 0.01      | 0.1623422 | ZNF224    | 0.061598276 |
| 15769 | 0.01      | 0.1628012 | TTC18     | 0.06142462  |
| 15770 | 0.01      | 0.1629328 | NAGPA-AS1 | 0.061375004 |
| 15771 | 0.01      | 0.1630646 | KLHL41    | 0.061325388 |
| 15772 | 0.01      | 0.1635277 | FAM95A    | 0.061151732 |
| 15773 | 0.144321  | 2.3727932 | C6orf147  | 0.060823245 |
| 15774 | 0.2174947 | 3.5758489 | CELSR2    | 0.060823245 |
| 15775 | 0.0797091 | 1.3105043 | CNTNAP3   | 0.060823245 |
| 15776 | 0.0652983 | 1.0735746 | CNTNAP3B  | 0.060823245 |
| 15777 | 0.01      | 0.1647979 | CST13P    | 0.06068038  |
| 15778 | 0.01      | 0.1647979 | UPK1A     | 0.06068038  |
| 15779 | 0.01      | 0.1650679 | C9orf173  | 0.060581148 |

|       |           |           |              |             |
|-------|-----------|-----------|--------------|-------------|
| 15780 | 0.3718468 | 6.1535227 | MAN1A1       | 0.060428289 |
| 15781 | 0.4864601 | 8.0606593 | STRBP        | 0.060349913 |
| 15782 | 0.01      | 0.1657466 | LOC339975    | 0.060333068 |
| 15783 | 0.01      | 0.1657466 | LOC440700    | 0.060333068 |
| 15784 | 0.01      | 0.165883  | SPATA12      | 0.060283452 |
| 15785 | 0.01      | 0.166225  | DACH2        | 0.060159412 |
| 15786 | 0.01      | 0.1666373 | FLJ33360     | 0.060010564 |
| 15787 | 0.01      | 0.1667062 | LOC100652739 | 0.059985756 |
| 15788 | 0.01      | 0.1667062 | LINC00242    | 0.059985756 |
| 15789 | 0.01      | 0.1673522 | AGBL2        | 0.059754215 |
| 15790 | 0.1703074 | 2.8549409 | PHF21B       | 0.059653568 |
| 15791 | 0.4473692 | 7.4994548 | EFCAB4B      | 0.059653567 |
| 15792 | 0.01      | 0.1680966 | DRD5         | 0.059489596 |
| 15793 | 0.01      | 0.1680966 | TNFAIP8L2    | 0.059489596 |
| 15794 | 0.01      | 0.168942  | DCAF4L1      | 0.0591919   |
| 15795 | 0.01      | 0.1689893 | ARPP21       | 0.059175361 |
| 15796 | 0.2507816 | 4.2443891 | FKBP1AP1     | 0.059085438 |
| 15797 | 0.01      | 0.1695104 | ACRV1        | 0.058993436 |
| 15798 | 0.01      | 0.1696531 | FAM179A      | 0.05894382  |
| 15799 | 0.01      | 0.1702262 | FXVD6-FXVD2  | 0.058745356 |
| 15800 | 0.01      | 0.1705143 | HESX1        | 0.058646124 |
| 15801 | 0.3125993 | 5.341018  | GABRQ        | 0.058528028 |
| 15802 | 0.01      | 0.1712386 | SLC6A13      | 0.058398044 |
| 15803 | 0.01      | 0.1713842 | CEACAM1      | 0.058348428 |
| 15804 | 0.01      | 0.1713842 | C10orf131    | 0.058348428 |
| 15805 | 0.09564   | 1.6417964 | NKD1         | 0.058253249 |
| 15806 | 0.01      | 0.1716762 | KRTAP4-11    | 0.058249196 |
| 15807 | 1.9678895 | 33.876786 | TNNT1        | 0.058089616 |
| 15808 | 0.01      | 0.1725581 | C13orf45     | 0.0579515   |
| 15809 | 0.2118804 | 3.6591839 | CHST6        | 0.057903729 |
| 15810 | 0.01      | 0.1734491 | ULK4P3       | 0.057653804 |
| 15811 | 0.01      | 0.1735487 | LOC100505495 | 0.057620726 |
| 15812 | 0.01      | 0.1735985 | H19          | 0.057604188 |
| 15813 | 0.01      | 0.1737481 | LOC653653    | 0.057554572 |
| 15814 | 0.0629986 | 1.0966932 | FAM134B      | 0.057444176 |
| 15815 | 0.1167831 | 2.0329847 | SNCAIP       | 0.057444176 |
| 15816 | 0.147045  | 2.5597892 | NEGR1        | 0.057444176 |
| 15817 | 0.2343872 | 4.0802601 | SHANK3       | 0.057444176 |
| 15818 | 0.4098894 | 7.1354394 | IGFBPL1      | 0.057444176 |
| 15819 | 0.0581229 | 1.0118146 | EML5         | 0.057444176 |
| 15820 | 0.1376938 | 2.3970012 | PRDM6        | 0.057444176 |
| 15821 | 0.0570645 | 0.9933903 | GPR132       | 0.057444176 |
| 15822 | 0.051444  | 0.8955471 | C2orf88      | 0.057444175 |



|       |           |           |              |             |
|-------|-----------|-----------|--------------|-------------|
| 15823 | 0.01      | 0.174702  | C2CD4A       | 0.057240337 |
| 15824 | 0.3206146 | 5.6433397 | TRPV4        | 0.056812921 |
| 15825 | 0.01      | 0.1763323 | KRTAP4-8     | 0.056711099 |
| 15826 | 0.01      | 0.1764095 | GRB7         | 0.056686291 |
| 15827 | 0.01      | 0.1766414 | SYCP3        | 0.056611867 |
| 15828 | 0.01      | 0.1766414 | FLJ34208     | 0.056611867 |
| 15829 | 0.01      | 0.1776622 | DCC          | 0.056286607 |
| 15830 | 0.01      | 0.1784399 | C2orf66      | 0.056041283 |
| 15831 | 0.01      | 0.1785189 | MTUS2-AS1    | 0.056016475 |
| 15832 | 0.01      | 0.1785453 | KNDC1        | 0.056008206 |
| 15833 | 0.0717506 | 1.2837442 | KIAA1804     | 0.055891631 |
| 15834 | 0.1288405 | 2.305184  | FCHO1        | 0.055891631 |
| 15835 | 0.2407851 | 4.3080707 | EPCAM        | 0.055891631 |
| 15836 | 0.1077557 | 1.9279396 | REEP1        | 0.055891631 |
| 15837 | 3.5284571 | 63.130331 | WARS2        | 0.055891631 |
| 15838 | 0.01      | 0.1792811 | GRIA4        | 0.055778318 |
| 15839 | 0.01      | 0.179313  | LOC100128675 | 0.055768395 |
| 15840 | 0.01      | 0.1805984 | LPIN3        | 0.055371467 |
| 15841 | 0.01      | 0.1810852 | GABRB1       | 0.055222619 |
| 15842 | 1.2857553 | 23.315304 | RIPK4        | 0.055146409 |
| 15843 | 0.01      | 0.1814112 | PPP1R42      | 0.055123387 |
| 15844 | 0.01      | 0.1814112 | NBPF6        | 0.055123387 |
| 15845 | 0.01      | 0.1817384 | C3orf55      | 0.055024155 |
| 15846 | 0.01      | 0.1819024 | HNRNPCL1     | 0.054974539 |
| 15847 | 0.01      | 0.1820667 | GATA3-AS1    | 0.054924923 |
| 15848 | 0.01      | 0.1823962 | FANCD2OS     | 0.054825691 |
| 15849 | 0.01      | 0.182727  | CD6          | 0.054726459 |
| 15850 | 0.01      | 0.1835591 | DHDH         | 0.054478379 |
| 15851 | 0.1687445 | 3.1007361 | LIN7A        | 0.054420798 |
| 15852 | 0.5184067 | 9.5258933 | CYP11A1      | 0.054420798 |
| 15853 | 0.4261748 | 7.8311024 | TMED8        | 0.054420798 |
| 15854 | 0.0828297 | 1.5220227 | C10orf55     | 0.054420798 |
| 15855 | 0.01      | 0.1838102 | ZNF732       | 0.054403955 |
| 15856 | 0.01      | 0.1847368 | CEP170P1     | 0.054131067 |
| 15857 | 0.01      | 0.1850761 | C19orf38     | 0.054031835 |
| 15858 | 0.01      | 0.1854166 | GADD45G      | 0.053932603 |
| 15859 | 1.6202099 | 30.06569  | MOK          | 0.053888999 |
| 15860 | 0.01      | 0.1857584 | NELL1        | 0.053833371 |
| 15861 | 0.01      | 0.1865033 | MESTIT1      | 0.053618368 |
| 15862 | 0.01      | 0.186532  | EMR2         | 0.053610099 |
| 15863 | 0.01      | 0.1869068 | RASGEF1A     | 0.053502598 |
| 15864 | 0.01      | 0.1871382 | KRTAP4-12    | 0.053436443 |
| 15865 | 3.9382583 | 73.834753 | ZNF697       | 0.053338816 |

|       |           |           |           |             |
|-------|-----------|-----------|-----------|-------------|
| 15866 | 0.01      | 0.1874864 | GPR89B    | 0.053337211 |
| 15867 | 0.01      | 0.1876027 | ACPP      | 0.053304133 |
| 15868 | 0.01      | 0.1880111 | AMTN      | 0.053188363 |
| 15869 | 13.530415 | 254.86778 | PLAU      | 0.053087979 |
| 15870 | 0.3984694 | 7.5146903 | NMB       | 0.053025393 |
| 15871 | 0.01      | 0.1888921 | PTPN5     | 0.052940283 |
| 15872 | 0.01      | 0.1892024 | KLHL14    | 0.052853455 |
| 15873 | 0.01      | 0.1893357 | MFNG      | 0.052816243 |
| 15874 | 0.01      | 0.1894247 | FAM9B     | 0.052791435 |
| 15875 | 0.01      | 0.1901395 | ANKRD53   | 0.052592971 |
| 15876 | 1.3677342 | 26.037615 | TFAP2C    | 0.052529166 |
| 15877 | 0.01      | 0.1903789 | KCNC3     | 0.052526816 |
| 15878 | 0.7261307 | 13.844501 | HOMER2    | 0.05244903  |
| 15879 | 0.01      | 0.1910406 | CELA3B    | 0.052344891 |
| 15880 | 0.5994233 | 11.497696 | NAGS      | 0.05213421  |
| 15881 | 0.01      | 0.1923166 | IL17C     | 0.051997578 |
| 15882 | 0.01      | 0.1932386 | MYL10     | 0.051749498 |
| 15883 | 0.0757403 | 1.4650034 | FAM84B    | 0.051699759 |
| 15884 | 0.1689497 | 3.2679019 | S1PR5     | 0.051699759 |
| 15885 | 0.1294809 | 2.5044778 | GPM6B     | 0.051699759 |
| 15886 | 0.3548232 | 6.8631503 | PPM1J     | 0.051699758 |
| 15887 | 0.2598498 | 5.0261309 | ZNF239    | 0.051699758 |
| 15888 | 0.0934108 | 1.8067938 | VGLL2     | 0.051699758 |
| 15889 | 0.162685  | 3.1642085 | PLEKHG4B  | 0.051414124 |
| 15890 | 0.01      | 0.1951092 | CPNE9     | 0.051253338 |
| 15891 | 0.01      | 0.1952983 | DBX1      | 0.051203722 |
| 15892 | 0.01      | 0.1962491 | KHDC3L    | 0.050955642 |
| 15893 | 0.01      | 0.1972092 | NAP1L6    | 0.050707562 |
| 15894 | 1.1174236 | 22.045984 | RNF130    | 0.050686038 |
| 15895 | 0.01      | 0.1975959 | PLA2G10   | 0.05060833  |
| 15896 | 0.01      | 0.1977898 | LOC150935 | 0.050558714 |
| 15897 | 0.01      | 0.1981009 | COL2A1    | 0.050479328 |
| 15898 | 0.120115  | 2.3814011 | BCAN      | 0.050438789 |
| 15899 | 0.1201843 | 2.3827744 | TTYH2     | 0.050438789 |
| 15900 | 0.01      | 0.1999483 | LOC339894 | 0.050012938 |
| 15901 | 0.01      | 0.2000475 | ESPNP     | 0.04998813  |
| 15902 | 0.01      | 0.2000475 | ZNF833P   | 0.04998813  |
| 15903 | 0.01      | 0.2003458 | ANKRD31   | 0.049913706 |
| 15904 | 0.3391367 | 6.8057247 | KCNAB3    | 0.049831092 |
| 15905 | 5.8943764 | 118.63893 | AKAP12    | 0.049683322 |
| 15906 | 0.01      | 0.2013063 | NCAM2     | 0.049675549 |
| 15907 | 0.01      | 0.2013465 | PRTN3     | 0.049665626 |
| 15908 | 0.3578512 | 7.2363417 | NRCAM     | 0.049451943 |

|       |           |           |            |             |
|-------|-----------|-----------|------------|-------------|
| 15909 | 0.01      | 0.2025607 | LOC731656  | 0.04936793  |
| 15910 | 0.01      | 0.2030368 | ACHE       | 0.049252159 |
| 15911 | 0.0856554 | 1.7396238 | KHK        | 0.049237865 |
| 15912 | 0.2114658 | 4.2947791 | SHISA3     | 0.049237865 |
| 15913 | 0.1769096 | 3.5929582 | ACOX2      | 0.049237865 |
| 15914 | 0.072689  | 1.4762835 | MCOLN3     | 0.049237865 |
| 15915 | 0.7523448 | 15.279801 | RMRP       | 0.049237865 |
| 15916 | 0.01      | 0.2031732 | HTR6       | 0.049219082 |
| 15917 | 0.01      | 0.2031732 | NOL4       | 0.049219082 |
| 15918 | 0.01      | 0.2035837 | FLJ30679   | 0.04911985  |
| 15919 | 0.01      | 0.2037895 | CDC42BPG   | 0.049070234 |
| 15920 | 0.01      | 0.2038926 | LOC151174  | 0.049045426 |
| 15921 | 1.1444234 | 23.35343  | NXPH4      | 0.04900451  |
| 15922 | 0.01      | 0.2042025 | NPBWR1     | 0.048971002 |
| 15923 | 0.01      | 0.2042715 | LOC643711  | 0.048954463 |
| 15924 | 0.01      | 0.2042853 | FRMPD1     | 0.048951155 |
| 15925 | 0.01      | 0.2050334 | PTENP1     | 0.048772538 |
| 15926 | 0.6810441 | 14.051266 | FEZ1       | 0.048468524 |
| 15927 | 0.1818042 | 3.767719  | SFMBT2     | 0.048253108 |
| 15928 | 0.01      | 0.2073538 | LOC643923  | 0.048226762 |
| 15929 | 0.01      | 0.2075673 | NKX1-2     | 0.048177146 |
| 15930 | 0.1916758 | 3.9855403 | OSBP2      | 0.048092799 |
| 15931 | 0.01      | 0.2086417 | FONG       | 0.047929066 |
| 15932 | 0.01      | 0.2086417 | CCDC110    | 0.047929066 |
| 15933 | 0.01      | 0.2090745 | LOC255654  | 0.047829834 |
| 15934 | 0.01      | 0.2104938 | SPNS3      | 0.04750733  |
| 15935 | 0.01      | 0.2106038 | MPZL2      | 0.047482522 |
| 15936 | 0.01      | 0.2108793 | NLRP14     | 0.047420502 |
| 15937 | 0.01      | 0.2109344 | CNGA4      | 0.047408098 |
| 15938 | 0.01      | 0.2117099 | RAB19      | 0.047234442 |
| 15939 | 0.0667092 | 1.419351  | C2CD4C     | 0.04699978  |
| 15940 | 0.1574906 | 3.3508805 | MARK1      | 0.04699978  |
| 15941 | 0.01      | 0.2137305 | SRD5A3-AS1 | 0.046787897 |
| 15942 | 0.01      | 0.2141847 | CELA2B     | 0.046688665 |
| 15943 | 0.01      | 0.2142132 | KCNK10     | 0.046682463 |
| 15944 | 0.01      | 0.2144126 | FGF21      | 0.046639049 |
| 15945 | 0.01      | 0.2144126 | CST7       | 0.046639049 |
| 15946 | 0.01      | 0.2147172 | LAIR1      | 0.046572895 |
| 15947 | 0.01      | 0.2148316 | RET        | 0.046548087 |
| 15948 | 0.01      | 0.2153289 | LINC00087  | 0.046440585 |
| 15949 | 0.01      | 0.2154824 | SRCRB4D    | 0.046407508 |
| 15950 | 12.85719  | 277.65778 | CKB        | 0.046305886 |
| 15951 | 0.01      | 0.2160213 | CGB        | 0.046291737 |

|       |           |           |               |             |
|-------|-----------|-----------|---------------|-------------|
| 15952 | 0.01      | 0.2162531 | LOC389705     | 0.046242121 |
| 15953 | 0.01      | 0.2167181 | OR5B21        | 0.046142889 |
| 15954 | 0.01      | 0.2167181 | LINC00692     | 0.046142889 |
| 15955 | 0.01      | 0.2170682 | ANGPTL6       | 0.046068465 |
| 15956 | 0.01      | 0.2175368 | SYT5          | 0.045969233 |
| 15957 | 0.1065778 | 2.3191595 | FRAS1         | 0.045955341 |
| 15958 | 0.1521275 | 3.310334  | DYNC2H1       | 0.045955341 |
| 15959 | 0.1609263 | 3.5017966 | NAPIL2        | 0.045955341 |
| 15960 | 0.01      | 0.2178896 | OR2L1P        | 0.045894809 |
| 15961 | 0.01      | 0.2181254 | TAS2R10       | 0.045845193 |
| 15962 | 0.01      | 0.2187409 | TTN-AS1       | 0.045716192 |
| 15963 | 0.01      | 0.2187765 | TSGA10        | 0.045708749 |
| 15964 | 0.01      | 0.2205923 | CADPS         | 0.045332495 |
| 15965 | 0.01      | 0.2209954 | OR10A2        | 0.045249801 |
| 15966 | 0.01      | 0.2214812 | LINC00575     | 0.045150569 |
| 15967 | 0.01      | 0.2216435 | PHACTR3       | 0.045117492 |
| 15968 | 0.01      | 0.221969  | C1orf68       | 0.045051337 |
| 15969 | 0.01      | 0.2221088 | GPRIN3        | 0.045022985 |
| 15970 | 0.01      | 0.2222954 | CTNND2        | 0.044985182 |
| 15971 | 0.4597048 | 10.225589 | CAMK2N2       | 0.044956312 |
| 15972 | 0.545263  | 12.12873  | PGF           | 0.044956312 |
| 15973 | 0.218907  | 4.8693282 | TMEM108       | 0.044956312 |
| 15974 | 0.1490164 | 3.3146947 | RASEF         | 0.044956312 |
| 15975 | 0.0613662 | 1.3650178 | STOX1         | 0.044956312 |
| 15976 | 0.0759197 | 1.6887433 | SH3GL2        | 0.044956312 |
| 15977 | 0.01      | 0.2227869 | CRHR1         | 0.04488595  |
| 15978 | 0.01      | 0.2233217 | C20orf166-AS1 | 0.044778449 |
| 15979 | 0.01      | 0.2236935 | PEBP4         | 0.044704025 |
| 15980 | 0.01      | 0.2241081 | ZNF311        | 0.044621332 |
| 15981 | 0.01      | 0.2243908 | IGDCC3        | 0.0445651   |
| 15982 | 6.8153132 | 153.04042 | OAF           | 0.044532766 |
| 15983 | 1.0821933 | 24.371142 | CYB5R2        | 0.0444047   |
| 15984 | 0.01      | 0.225319  | C9orf171      | 0.044381521 |
| 15985 | 0.3595575 | 8.1146243 | UGT8          | 0.044309809 |
| 15986 | 0.01      | 0.2263311 | PRRT4         | 0.044183057 |
| 15987 | 0.01      | 0.2263311 | LINC00461     | 0.044183057 |
| 15988 | 0.01      | 0.226628  | ZNF214        | 0.044125172 |
| 15989 | 0.01      | 0.2271388 | KCNN1         | 0.04402594  |
| 15990 | 0.01      | 0.2279953 | KIRREL3-AS3   | 0.043860553 |
| 15991 | 0.01      | 0.2281243 | BARX2         | 0.043835745 |
| 15992 | 0.01      | 0.2281502 | ZNF10         | 0.043830783 |
| 15993 | 0.01      | 0.2287717 | TGIF2LX       | 0.043711705 |
| 15994 | 0.01      | 0.2290316 | CGB7          | 0.043662089 |

|       |           |           |              |             |
|-------|-----------|-----------|--------------|-------------|
| 15995 | 0.01      | 0.2295534 | CCL21        | 0.043562857 |
| 15996 | 0.4451079 | 10.245277 | HOXD13       | 0.043445175 |
| 15997 | 0.01      | 0.2306039 | PRG2         | 0.043364393 |
| 15998 | 0.01      | 0.2315311 | CNTN4        | 0.043190737 |
| 15999 | 0.01      | 0.2317974 | MTRNR2L5     | 0.043141121 |
| 16000 | 0.01      | 0.2317974 | LOC440910    | 0.043141121 |
| 16001 | 0.01      | 0.2319575 | ROBO2        | 0.043111351 |
| 16002 | 0.0151607 | 0.351895  | AFF2         | 0.043083133 |
| 16003 | 0.0622274 | 1.444356  | FBXO43       | 0.043083132 |
| 16004 | 0.01      | 0.2327342 | SHD          | 0.042967465 |
| 16005 | 0.5884434 | 13.702102 | ST6GAL1      | 0.042945486 |
| 16006 | 0.01      | 0.2335433 | IFNA1        | 0.042818617 |
| 16007 | 0.01      | 0.2338142 | BLID         | 0.042769001 |
| 16008 | 0.01      | 0.2345398 | PPP2R2B      | 0.042636691 |
| 16009 | 0.01      | 0.2355907 | GPR143       | 0.042446497 |
| 16010 | 0.01      | 0.2357285 | MYL2         | 0.042421689 |
| 16011 | 1.1802271 | 27.913011 | WSCD1        | 0.04228233  |
| 16012 | 1.5902841 | 37.611079 | F2RL1        | 0.04228233  |
| 16013 | 0.01      | 0.2368365 | PACRG        | 0.042223225 |
| 16014 | 0.01      | 0.2368713 | KCNC1        | 0.042217023 |
| 16015 | 0.3318463 | 7.8629335 | TGFBR3L      | 0.042203884 |
| 16016 | 0.01      | 0.2386594 | HSD3B1       | 0.04190072  |
| 16017 | 0.01      | 0.239084  | CRYGS        | 0.041826296 |
| 16018 | 0.5896986 | 14.143709 | LAT          | 0.041693354 |
| 16019 | 0.01      | 0.2398808 | NPR1         | 0.041687372 |
| 16020 | 0.01      | 0.2402239 | FOXN4        | 0.041627832 |
| 16021 | 0.01      | 0.2416641 | ANKRD55      | 0.041379752 |
| 16022 | 0.0879323 | 2.1260321 | WNT10B       | 0.041359807 |
| 16023 | 0.1492833 | 3.6093812 | PTP4A3       | 0.041359807 |
| 16024 | 0.1142541 | 2.7624431 | C4orf19      | 0.041359807 |
| 16025 | 0.424151  | 10.255148 | ARC          | 0.041359807 |
| 16026 | 0.117276  | 2.8355071 | MMP10        | 0.041359807 |
| 16027 | 0.0886806 | 2.144126  | SOX17        | 0.041359807 |
| 16028 | 0.0531767 | 1.2857097 | CXorf57      | 0.041359807 |
| 16029 | 0.01      | 0.242245  | HLA-DQB1     | 0.04128052  |
| 16030 | 0.01      | 0.2436114 | ZMAT4        | 0.041048979 |
| 16031 | 0.504355  | 12.291882 | NPAS1        | 0.041031554 |
| 16032 | 0.01      | 0.2443004 | NOXA1        | 0.040933208 |
| 16033 | 0.01      | 0.2448941 | SIRPB1       | 0.040833976 |
| 16034 | 0.01      | 0.245391  | PTPN6        | 0.040751283 |
| 16035 | 0.3378721 | 8.2997979 | FGFR4        | 0.040708471 |
| 16036 | 0.01      | 0.2457901 | GKN1         | 0.040685128 |
| 16037 | 0.01      | 0.246391  | LOC100288974 | 0.040585896 |

|       |           |           |              |             |
|-------|-----------|-----------|--------------|-------------|
| 16038 | 0.1279702 | 3.1559534 | FIBCD1       | 0.04054883  |
| 16039 | 0.01      | 0.247754  | FAM47E       | 0.040362624 |
| 16040 | 0.01      | 0.2480589 | COL24A1      | 0.040313008 |
| 16041 | 0.01      | 0.2482116 | KRTAP2-4     | 0.0402882   |
| 16042 | 0.01      | 0.2494404 | KCNIP4       | 0.040089736 |
| 16043 | 0.01      | 0.2494404 | AOC3         | 0.040089736 |
| 16044 | 0.01      | 0.2499043 | ART3         | 0.040015312 |
| 16045 | 0.01      | 0.2505256 | LOC100499484 | 0.03991608  |
| 16046 | 0.01      | 0.2509936 | LOC100508120 | 0.039841656 |
| 16047 | 0.01      | 0.2513065 | PRSS2        | 0.03979204  |
| 16048 | 0.0669449 | 1.6833421 | NTNG2        | 0.039769045 |
| 16049 | 0.0789392 | 1.9849409 | FAM43B       | 0.039769045 |
| 16050 | 0.1612999 | 4.0559164 | TMEM200B     | 0.039769045 |
| 16051 | 0.1820878 | 4.5786317 | SLC7A3       | 0.039769045 |
| 16052 | 0.01      | 0.2522501 | ATP5L2       | 0.039643192 |
| 16053 | 0.01      | 0.2525662 | MEDAG        | 0.039593576 |
| 16054 | 0.01      | 0.2528831 | PLEKHB1      | 0.03954396  |
| 16055 | 0.01      | 0.2537108 | KIF6         | 0.039414958 |
| 16056 | 0.01      | 0.2537587 | CD8A         | 0.039407516 |
| 16057 | 0.4782547 | 12.141437 | E2F5         | 0.039390292 |
| 16058 | 0.01      | 0.2549087 | FAIM2        | 0.039229725 |
| 16059 | 0.01      | 0.2554472 | LCN1         | 0.039147032 |
| 16060 | 0.01      | 0.2557714 | LCA5L        | 0.039097416 |
| 16061 | 0.01      | 0.2564222 | SPINK2       | 0.038998184 |
| 16062 | 0.01      | 0.2566944 | FIGNL2       | 0.038956837 |
| 16063 | 0.01      | 0.2575362 | DPP4         | 0.038829489 |
| 16064 | 0.01      | 0.2575691 | IQCJ         | 0.038824528 |
| 16065 | 0.01      | 0.2575691 | SLC22A18AS   | 0.038824528 |
| 16066 | 0.01      | 0.2577998 | C7orf63      | 0.038789797 |
| 16067 | 0.1536303 | 3.9744968 | RASSF2       | 0.038654025 |
| 16068 | 0.01      | 0.2587264 | LOC100130238 | 0.038650872 |
| 16069 | 0.01      | 0.2587264 | IRX6         | 0.038650872 |
| 16070 | 0.1992347 | 5.2024779 | CYTH4        | 0.038296117 |
| 16071 | 0.0742428 | 1.9386505 | FAM53A       | 0.038296117 |
| 16072 | 1.2388345 | 32.348829 | TUBA4A       | 0.038296117 |
| 16073 | 0.2803677 | 7.3210488 | CHD5         | 0.038296117 |
| 16074 | 0.0491277 | 1.2828364 | TSPAN18      | 0.038296117 |
| 16075 | 0.0810262 | 2.1157822 | SLC38A3      | 0.038296117 |
| 16076 | 0.01      | 0.261411  | CD3D         | 0.038253944 |
| 16077 | 0.01      | 0.2617505 | NACA2        | 0.038204328 |
| 16078 | 0.01      | 0.262034  | LRRC16B      | 0.038162981 |
| 16079 | 0.01      | 0.2622614 | AURKAPS1     | 0.038129904 |
| 16080 | 0.194584  | 5.1124026 | AUTS2        | 0.038061172 |

|       |           |           |           |             |
|-------|-----------|-----------|-----------|-------------|
| 16081 | 0.2912234 | 7.6608461 | ZNF853    | 0.038014528 |
| 16082 | 3.4375175 | 90.592641 | S100A2    | 0.037944777 |
| 16083 | 0.01      | 0.2639788 | KLK6      | 0.037881824 |
| 16084 | 0.01      | 0.2641518 | LSMEM2    | 0.037857016 |
| 16085 | 0.1378912 | 3.6476134 | FLT4      | 0.037803117 |
| 16086 | 0.01      | 0.265719  | REG4      | 0.037633744 |
| 16087 | 0.01      | 0.2658943 | CHI3L2    | 0.037608936 |
| 16088 | 0.01      | 0.2667153 | KCNA2     | 0.037493165 |
| 16089 | 0.4995793 | 13.335061 | DOCK4     | 0.037463593 |
| 16090 | 0.01      | 0.2670097 | SNAP91    | 0.037451818 |
| 16091 | 0.01      | 0.2671277 | PCDHAC2   | 0.03743528  |
| 16092 | 0.01      | 0.2673048 | PNMA6C    | 0.037410472 |
| 16093 | 0.01      | 0.2680158 | FABP6     | 0.03731124  |
| 16094 | 0.01      | 0.2697581 | KCNJ12    | 0.037070247 |
| 16095 | 0.01      | 0.2701714 | HCG17     | 0.037013543 |
| 16096 | 0.0205441 | 0.5563229 | PCLO      | 0.036928399 |
| 16097 | 0.069629  | 1.8855128 | SLC17A7   | 0.036928399 |
| 16098 | 0.1508502 | 4.0849365 | FGF11     | 0.036928399 |
| 16099 | 0.1122237 | 3.0389552 | NKX2-8    | 0.036928399 |
| 16100 | 0.2448159 | 6.629474  | ARHGAP4   | 0.036928399 |
| 16101 | 0.001908  | 0.0516676 | TTN       | 0.036928399 |
| 16102 | 0.1874096 | 5.0749458 | MSX2      | 0.036928399 |
| 16103 | 0.0804942 | 2.1797372 | HTRA3     | 0.036928399 |
| 16104 | 0.042152  | 1.1414522 | RNF180    | 0.036928398 |
| 16105 | 0.01      | 0.2716278 | C1orf194  | 0.036815079 |
| 16106 | 0.01      | 0.2731001 | SLN       | 0.036616615 |
| 16107 | 0.01      | 0.2738422 | DMRT2     | 0.036517383 |
| 16108 | 0.1739078 | 4.7653872 | C2orf72   | 0.036493947 |
| 16109 | 0.01      | 0.2744014 | C10orf95  | 0.036442959 |
| 16110 | 0.01      | 0.2750568 | BEAN1     | 0.036356131 |
| 16111 | 0.01      | 0.2760929 | C21orf37  | 0.036219687 |
| 16112 | 0.01      | 0.2764717 | CCDC173   | 0.036170071 |
| 16113 | 0.01      | 0.2765981 | CBFA2T3   | 0.036153533 |
| 16114 | 1.3925794 | 38.585672 | BACE2     | 0.036090582 |
| 16115 | 0.01      | 0.2778925 | RP1L1     | 0.035985139 |
| 16116 | 0.01      | 0.2791521 | LINC00494 | 0.035822759 |
| 16117 | 0.01      | 0.2791521 | MRGPRX4   | 0.035822759 |
| 16118 | 0.01      | 0.280161  | KCNK2     | 0.035693758 |
| 16119 | 0.01      | 0.280187  | DDX11L2   | 0.03569045  |
| 16120 | 0.0345089 | 0.9678569 | TPPP      | 0.035655006 |
| 16121 | 0.2893098 | 8.1141429 | KCNK1     | 0.035655006 |
| 16122 | 0.4486534 | 12.583181 | FAM20C    | 0.035655006 |
| 16123 | 0.0865267 | 2.426775  | PIK3AP1   | 0.035655006 |

|       |           |           |              |             |
|-------|-----------|-----------|--------------|-------------|
| 16124 | 0.01      | 0.2813168 | FOXP2        | 0.035547115 |
| 16125 | 0.01      | 0.2814914 | FAM229A      | 0.035525063 |
| 16126 | 0.01      | 0.2826758 | SPI1         | 0.035376215 |
| 16127 | 0.01      | 0.2829933 | USH1G        | 0.035336522 |
| 16128 | 0.01      | 0.283471  | TMEM238      | 0.035276983 |
| 16129 | 0.01      | 0.2843709 | PROX1        | 0.035165347 |
| 16130 | 0.01      | 0.2854785 | BHLHA15      | 0.035028903 |
| 16131 | 0.01      | 0.2854785 | HLA-DMB      | 0.035028903 |
| 16132 | 0.01      | 0.2858835 | ANP32C       | 0.034979287 |
| 16133 | 0.01      | 0.286493  | PITX3        | 0.034904863 |
| 16134 | 0.01      | 0.2866968 | HCG25        | 0.034880055 |
| 16135 | 0.01      | 0.2866968 | FLJ11235     | 0.034880055 |
| 16136 | 0.01      | 0.2866968 | FAM27B       | 0.034880055 |
| 16137 | 0.01      | 0.2868328 | SLC30A3      | 0.034863516 |
| 16138 | 0.01      | 0.2869009 | SHISA8       | 0.034855247 |
| 16139 | 0.01      | 0.2885438 | HAR1A        | 0.034656783 |
| 16140 | 0.01      | 0.2904148 | HLA-DOB      | 0.034433511 |
| 16141 | 0.01      | 0.2925223 | DRD4         | 0.034185431 |
| 16142 | 0.01      | 0.2948761 | HNF4G        | 0.033912543 |
| 16143 | 0.01      | 0.295092  | MYLPF        | 0.033887735 |
| 16144 | 0.01      | 0.2952361 | ST6GALNAC5   | 0.033871196 |
| 16145 | 0.01      | 0.2955247 | SPRR2D       | 0.033838119 |
| 16146 | 1.0080424 | 29.914052 | WNT7B        | 0.033697956 |
| 16147 | 0.01      | 0.2968304 | TTC36        | 0.033689271 |
| 16148 | 0.01      | 0.2977073 | HNRNPA1P10   | 0.033590039 |
| 16149 | 0.01      | 0.298977  | FREM2        | 0.033447393 |
| 16150 | 0.01      | 0.2997737 | LOC100129858 | 0.033358497 |
| 16151 | 0.0371677 | 1.1143184 | HLF          | 0.033354683 |
| 16152 | 0.054842  | 1.6442061 | CLIC6        | 0.033354683 |
| 16153 | 0.1864038 | 5.588536  | CDYL2        | 0.033354683 |
| 16154 | 0.0282576 | 0.8471842 | ARAP2        | 0.033354682 |
| 16155 | 0.01      | 0.3003694 | BEND5        | 0.033292343 |
| 16156 | 0.01      | 0.3006382 | PARD6G-AS1   | 0.033262573 |
| 16157 | 2.3199019 | 69.756476 | UBASH3B      | 0.033257155 |
| 16158 | 0.3618047 | 10.882184 | BTBD11       | 0.033247433 |
| 16159 | 0.01      | 0.3023974 | ADAM21       | 0.033069071 |
| 16160 | 0.01      | 0.3035359 | RNF148       | 0.032945031 |
| 16161 | 0.01      | 0.3038792 | FEZF1-AS1    | 0.032907819 |
| 16162 | 0.01      | 0.3039937 | STARD6       | 0.032895415 |
| 16163 | 0.01      | 0.3041084 | DNMBP-AS1    | 0.032883011 |
| 16164 | 0.01      | 0.3042614 | SLIT1        | 0.032866472 |
| 16165 | 0.01      | 0.3044529 | AKR7A2P1     | 0.032845799 |
| 16166 | 0.3373525 | 10.277227 | FHOD3        | 0.032825243 |



|       |           |           |              |             |
|-------|-----------|-----------|--------------|-------------|
| 16167 | 0.01      | 0.3053755 | TIGD3        | 0.032746567 |
| 16168 | 0.01      | 0.3058389 | LOC441242    | 0.032696951 |
| 16169 | 0.1637932 | 5.016255  | POU4F1       | 0.032652479 |
| 16170 | 0.01      | 0.3063037 | FLJ42875     | 0.032647335 |
| 16171 | 0.01      | 0.3063037 | RPL13AP5     | 0.032647335 |
| 16172 | 0.01      | 0.3067699 | RPL29P2      | 0.032597719 |
| 16173 | 0.4150113 | 12.751112 | CDH4         | 0.032547063 |
| 16174 | 0.01      | 0.3077066 | ANXA2P2      | 0.032498487 |
| 16175 | 0.01      | 0.3080201 | C9orf62      | 0.032465409 |
| 16176 | 0.01      | 0.3083343 | ARTN         | 0.032432332 |
| 16177 | 0.01      | 0.3094785 | ZNF879       | 0.032312427 |
| 16178 | 0.0888697 | 2.7503331 | CACNG7       | 0.032312349 |
| 16179 | 0.3593095 | 11.119881 | PRSS3        | 0.032312349 |
| 16180 | 0.0608022 | 1.8817013 | KIAA1324L    | 0.032312349 |
| 16181 | 0.0328343 | 1.0161543 | MMP16        | 0.032312349 |
| 16182 | 0.01      | 0.3095973 | PIH1D3       | 0.032300023 |
| 16183 | 0.01      | 0.3100736 | KRT18P55     | 0.032250407 |
| 16184 | 0.01      | 0.3103123 | CDR1         | 0.032225598 |
| 16185 | 0.01      | 0.3109507 | ADRA2A       | 0.032159444 |
| 16186 | 0.01      | 0.311649  | PSD2         | 0.032087383 |
| 16187 | 0.01      | 0.3122352 | MGC16142     | 0.032027134 |
| 16188 | 0.01      | 0.3127197 | C3orf49      | 0.031977518 |
| 16189 | 0.01      | 0.3132868 | TMEM221      | 0.031919633 |
| 16190 | 0.2171959 | 6.82679   | PPARG        | 0.031815236 |
| 16191 | 0.1091097 | 3.4294791 | GLDC         | 0.031815236 |
| 16192 | 0.01      | 0.3149185 | BTF3P11      | 0.031754246 |
| 16193 | 0.01      | 0.3154113 | FAM157B      | 0.03170463  |
| 16194 | 0.01      | 0.3161535 | FAM157A      | 0.031630206 |
| 16195 | 0.01      | 0.3164016 | FAM90A25P    | 0.031605398 |
| 16196 | 0.01      | 0.3170986 | ACRC         | 0.031535936 |
| 16197 | 0.1823587 | 5.7847124 | LOC100288181 | 0.031524243 |
| 16198 | 0.1110872 | 3.5453513 | CYP2J2       | 0.031333187 |
| 16199 | 0.0347217 | 1.1081438 | MIR600HG     | 0.031333187 |
| 16200 | 0.01      | 0.3194102 | FLJ21408     | 0.031307702 |
| 16201 | 0.01      | 0.3200188 | RSPO2        | 0.031248163 |
| 16202 | 0.01      | 0.3202222 | SYN3         | 0.031228317 |
| 16203 | 0.01      | 0.3202561 | CNTN1        | 0.031225009 |
| 16204 | 0.01      | 0.3216189 | PLA2G7       | 0.0310927   |
| 16205 | 0.01      | 0.3224766 | RNASEH2B-AS1 | 0.031010006 |
| 16206 | 0.01      | 0.3226831 | TOX3         | 0.03099016  |
| 16207 | 0.1780431 | 5.7683493 | P2RX5        | 0.030865527 |
| 16208 | 0.01      | 0.3256023 | HRH2         | 0.03071231  |
| 16209 | 0.01      | 0.3277201 | HCG23        | 0.030513846 |

|       |           |           |           |             |
|-------|-----------|-----------|-----------|-------------|
| 16210 | 0.01      | 0.3278978 | LINC00671 | 0.030497307 |
| 16211 | 0.0447786 | 1.4724166 | STOX2     | 0.030411623 |
| 16212 | 0.0415138 | 1.3650651 | SPATA6    | 0.030411623 |
| 16213 | 0.2464808 | 8.1048218 | SH2D2A    | 0.030411623 |
| 16214 | 0.0180604 | 0.5938666 | MBNL3     | 0.030411622 |
| 16215 | 0.01      | 0.3288787 | EPHA6     | 0.030406345 |
| 16216 | 0.01      | 0.3293265 | ZMYND15   | 0.030364998 |
| 16217 | 1.0762055 | 35.46231  | HOXB9     | 0.030347867 |
| 16218 | 0.01      | 0.3301357 | KCNJ2-AS1 | 0.030290574 |
| 16219 | 0.386402  | 12.830302 | FAM50B    | 0.030116364 |
| 16220 | 0.01      | 0.3331369 | TPH1      | 0.030017686 |
| 16221 | 0.01      | 0.333965  | MGC39584  | 0.029943262 |
| 16222 | 0.01      | 0.333965  | C15orf27  | 0.029943262 |
| 16223 | 0.01      | 0.3342419 | MAMDC2    | 0.029918454 |
| 16224 | 0.4440781 | 14.847665 | POLR3G    | 0.029908951 |
| 16225 | 0.01      | 0.3346118 | HSD3B2    | 0.029885377 |
| 16226 | 0.01      | 0.3352426 | ISM2      | 0.029829145 |
| 16227 | 0.01      | 0.3364739 | STX19     | 0.02971999  |
| 16228 | 0.01      | 0.3368488 | HAPLN2    | 0.029686913 |
| 16229 | 0.01      | 0.3368957 | PCDH20    | 0.029682778 |
| 16230 | 0.01      | 0.3372929 | SEZ6L     | 0.029647821 |
| 16231 | 0.01      | 0.3380257 | LINC00663 | 0.029583546 |
| 16232 | 0.0848878 | 2.8733909 | SPSB4     | 0.029542719 |
| 16233 | 0.01      | 0.3388498 | NPY1R     | 0.029511603 |
| 16234 | 0.01      | 0.339449  | WNT10A    | 0.029459506 |
| 16235 | 0.3011191 | 10.241203 | CSPG4     | 0.029402706 |
| 16236 | 0.01      | 0.3401651 | SLC25A52  | 0.029397486 |
| 16237 | 0.5158403 | 17.647909 | C17orf96  | 0.029229545 |
| 16238 | 0.1102935 | 3.7866888 | SYPL2     | 0.029126624 |
| 16239 | 0.01      | 0.3437428 | FAM106CP  | 0.029091521 |
| 16240 | 0.01      | 0.3439383 | PVALB     | 0.029074982 |
| 16241 | 1.2505757 | 43.022215 | RPP25     | 0.029068137 |
| 16242 | 0.01      | 0.3445262 | PLA2G1B   | 0.029025366 |
| 16243 | 0.01      | 0.3451162 | ASIP      | 0.02897575  |
| 16244 | 0.01      | 0.3454119 | EFTUD1P1  | 0.028950942 |
| 16245 | 0.7386024 | 25.55064  | JAM3      | 0.028907392 |
| 16246 | 0.3800599 | 13.15064  | KCTD15    | 0.028900486 |
| 16247 | 0.01      | 0.3463021 | CBLN2     | 0.028876518 |
| 16248 | 0.4839934 | 16.7729   | FERMT1    | 0.028855679 |
| 16249 | 0.01      | 0.3480213 | MAP3K15   | 0.028733872 |
| 16250 | 0.0667092 | 2.3225744 | NSG1      | 0.028722088 |
| 16251 | 0.0716642 | 2.4950903 | LMX1B     | 0.028722088 |
| 16252 | 0.0595597 | 2.073656  | RAB39B    | 0.028722088 |

|       |           |           |              |             |
|-------|-----------|-----------|--------------|-------------|
| 16253 | 0.01      | 0.3482167 | RGS9BP       | 0.028717747 |
| 16254 | 0.01      | 0.3484977 | KRT222       | 0.028694592 |
| 16255 | 0.01      | 0.3486987 | GOLGA6L7P    | 0.028678054 |
| 16256 | 0.01      | 0.349606  | MAL          | 0.02860363  |
| 16257 | 0.237087  | 8.2927347 | CACHD1       | 0.028589728 |
| 16258 | 0.01      | 0.3517414 | FDCSP        | 0.028429974 |
| 16259 | 0.01      | 0.3517414 | CHRNA9       | 0.028429974 |
| 16260 | 0.01      | 0.3523564 | LOC100131626 | 0.028380358 |
| 16261 | 0.2376729 | 8.3898458 | FRMD4B       | 0.028328635 |
| 16262 | 0.01      | 0.3542141 | VSIG2        | 0.02823151  |
| 16263 | 0.01      | 0.3548378 | SELV         | 0.028181894 |
| 16264 | 0.01      | 0.3548378 | B3GALT4      | 0.028181894 |
| 16265 | 0.01      | 0.3556727 | WNT6         | 0.028115739 |
| 16266 | 0.01      | 0.3560916 | LOC100129726 | 0.028082662 |
| 16267 | 0.01      | 0.3564064 | FLJ40852     | 0.028057854 |
| 16268 | 0.0335912 | 1.20201   | MFAP3L       | 0.027945815 |
| 16269 | 0.194584  | 6.9629042 | NDRG2        | 0.027945815 |
| 16270 | 0.0722481 | 2.5852905 | IQGAP2       | 0.027945815 |
| 16271 | 0.01      | 0.3579891 | LOC441461    | 0.027933814 |
| 16272 | 0.01      | 0.3592653 | LINC00235    | 0.027834582 |
| 16273 | 1.4341146 | 51.609681 | GRAMD1B      | 0.027787706 |
| 16274 | 0.01      | 0.3623332 | KGFLP1       | 0.027598906 |
| 16275 | 0.01      | 0.3627136 | DGCR5        | 0.027569963 |
| 16276 | 0.01      | 0.3631493 | GJB3         | 0.027536886 |
| 16277 | 0.01      | 0.3634767 | C16orf98     | 0.027512078 |
| 16278 | 0.01      | 0.364298  | TPTE2        | 0.027450058 |
| 16279 | 0.01      | 0.3644627 | IRGM         | 0.027437654 |
| 16280 | 0.1616126 | 5.9002956 | TRIM58       | 0.027390601 |
| 16281 | 0.2381164 | 8.7048773 | RAVER2       | 0.02735437  |
| 16282 | 5.0988104 | 187.23632 | KRAS         | 0.027231952 |
| 16283 | 0.1758646 | 6.4631377 | CMTM8        | 0.027210399 |
| 16284 | 0.01      | 0.3684604 | LOC643648    | 0.027139957 |
| 16285 | 0.01      | 0.3684604 | EMX1         | 0.027139957 |
| 16286 | 0.5368354 | 19.83289  | STXBP2       | 0.027067936 |
| 16287 | 0.01      | 0.3698126 | HOXB-AS3     | 0.027040725 |
| 16288 | 0.01      | 0.3699823 | SPON2        | 0.027028321 |
| 16289 | 0.01      | 0.3700842 | PTPRZ1       | 0.027020879 |
| 16290 | 0.01      | 0.3723748 | IVL          | 0.026854665 |
| 16291 | 0.01      | 0.3742764 | RAB41        | 0.026718221 |
| 16292 | 1.6722126 | 62.667836 | LY6K         | 0.026683746 |
| 16293 | 0.01      | 0.3749727 | S100A14      | 0.026668605 |
| 16294 | 0.01      | 0.3760221 | PTH1R        | 0.026594181 |
| 16295 | 0.01      | 0.3763732 | FAM66D       | 0.026569373 |

|       |           |           |             |             |
|-------|-----------|-----------|-------------|-------------|
| 16296 | 0.030575  | 1.1532227 | MAPT        | 0.026512697 |
| 16297 | 0.01      | 0.3774304 | SP8         | 0.026494949 |
| 16298 | 0.01      | 0.3779967 | ADRA1D      | 0.026455257 |
| 16299 | 0.01      | 0.3784936 | LINGO3      | 0.026420525 |
| 16300 | 0.01      | 0.3803986 | CASS4       | 0.026288216 |
| 16301 | 0.01      | 0.381238  | SNTN        | 0.026230331 |
| 16302 | 0.01      | 0.3819907 | GRM4        | 0.026178647 |
| 16303 | 0.01      | 0.3846333 | HCST        | 0.025998789 |
| 16304 | 0.01      | 0.3851233 | FBXL22      | 0.025965712 |
| 16305 | 0.152172  | 5.8867571 | PIANP       | 0.025849879 |
| 16306 | 0.9094741 | 35.182916 | CAPG        | 0.025849879 |
| 16307 | 0.3307929 | 12.796689 | HENMT1      | 0.025849879 |
| 16308 | 0.46017   | 17.857262 | CORO2B      | 0.02576935  |
| 16309 | 0.01      | 0.3902185 | C11orf65    | 0.025626669 |
| 16310 | 0.01      | 0.3921164 | BRWD1-IT2   | 0.025502629 |
| 16311 | 0.01      | 0.3927277 | PREX2       | 0.025462936 |
| 16312 | 0.01      | 0.3928808 | ARL13A      | 0.025453013 |
| 16313 | 0.01      | 0.3928808 | FGF22       | 0.025453013 |
| 16314 | 0.01      | 0.3951919 | PCOLCE-AS1  | 0.025304165 |
| 16315 | 0.01      | 0.3960461 | ADAMTS19    | 0.025249588 |
| 16316 | 0.0610247 | 2.4197545 | ALOXE3      | 0.025219394 |
| 16317 | 0.2773114 | 10.995957 | TAGLN3      | 0.025219394 |
| 16318 | 0.0540876 | 2.1446825 | KCNH3       | 0.025219394 |
| 16319 | 0.01      | 0.3967477 | TFF1        | 0.025204933 |
| 16320 | 0.01      | 0.3977918 | NOX5        | 0.025138778 |
| 16321 | 0.01      | 0.4006915 | PKIB        | 0.024956853 |
| 16322 | 0.01      | 0.4014897 | CRYM        | 0.024907237 |
| 16323 | 0.01      | 0.4022911 | LOC731223   | 0.024857621 |
| 16324 | 0.01      | 0.4053657 | LMTK3       | 0.02466908  |
| 16325 | 0.01      | 0.4055289 | BHLHE40-AS1 | 0.024659157 |
| 16326 | 0.0294599 | 1.1966369 | MYH15       | 0.024618933 |
| 16327 | 0.2036146 | 8.2706493 | PCOLCE2     | 0.024618933 |
| 16328 | 0.0824365 | 3.3485006 | CDK5R2      | 0.024618933 |
| 16329 | 0.01      | 0.4076615 | PABPC4L     | 0.024530155 |
| 16330 | 0.01      | 0.4092342 | STXBP6      | 0.024435885 |
| 16331 | 0.01      | 0.4116021 | FAM196A     | 0.024295306 |
| 16332 | 0.3924661 | 16.22631  | SULF2       | 0.024187021 |
| 16333 | 0.01      | 0.4147075 | PTGER1      | 0.024113381 |
| 16334 | 0.01      | 0.4147075 | PABPC3      | 0.024113381 |
| 16335 | 0.0718619 | 2.9884681 | TSPAN33     | 0.024046399 |
| 16336 | 0.0711747 | 2.9598898 | KCNIP3      | 0.024046399 |
| 16337 | 0.0654316 | 2.7210541 | VIPR1       | 0.024046399 |
| 16338 | 0.01      | 0.4168518 | LEMD1       | 0.023989341 |

|       |           |           |             |             |
|-------|-----------|-----------|-------------|-------------|
| 16339 | 0.01      | 0.4190184 | HIST1H2AH   | 0.023865301 |
| 16340 | 0.1685398 | 7.0904419 | TRIM9       | 0.023770004 |
| 16341 | 0.01      | 0.4207679 | TPRG1-AS2   | 0.023766069 |
| 16342 | 3.0191887 | 127.30875 | CLDN11      | 0.023715486 |
| 16343 | 0.01      | 0.4225322 | UGT3A2      | 0.023666837 |
| 16344 | 0.0531631 | 2.2622718 | TBC1D30     | 0.02349989  |
| 16345 | 0.0955961 | 4.0679382 | PLEKHH1     | 0.02349989  |
| 16346 | 0.0130543 | 0.5555065 | BSN         | 0.02349989  |
| 16347 | 0.01      | 0.4279148 | MEIOB       | 0.023369141 |
| 16348 | 0.01      | 0.4280662 | BAI3        | 0.023360871 |
| 16349 | 0.01      | 0.4283695 | AQP3        | 0.023344333 |
| 16350 | 0.01      | 0.4291905 | GLUD2       | 0.023299678 |
| 16351 | 0.01      | 0.4297395 | KRTAP4-7    | 0.023269909 |
| 16352 | 0.01      | 0.430888  | PPP1R1B     | 0.023207889 |
| 16353 | 0.1578386 | 6.8183316 | SEMA6B      | 0.023149146 |
| 16354 | 0.01      | 0.4319847 | MYO7A       | 0.02314897  |
| 16355 | 0.01      | 0.4322742 | PKNOX2      | 0.023133465 |
| 16356 | 0.01      | 0.4334362 | OR2A20P     | 0.023071445 |
| 16357 | 0.0415967 | 1.81031   | SBK1        | 0.022977671 |
| 16358 | 0.042246  | 1.8385674 | MAST1       | 0.02297767  |
| 16359 | 0.01      | 0.4375134 | LOC728537   | 0.022856442 |
| 16360 | 0.01      | 0.4382836 | SERTM1      | 0.022816277 |
| 16361 | 0.01      | 0.4389654 | PIWIL4      | 0.022780837 |
| 16362 | 0.359723  | 15.887258 | LPAR3       | 0.02264223  |
| 16363 | 0.01      | 0.4421294 | LHFPL3      | 0.022617813 |
| 16364 | 0.01      | 0.4423142 | CATSPER3    | 0.022608362 |
| 16365 | 0.01      | 0.4432406 | FAM84A      | 0.022561109 |
| 16366 | 0.01      | 0.4433683 | MAP10       | 0.022554611 |
| 16367 | 0.0324964 | 1.4456886 | SYT7        | 0.022478156 |
| 16368 | 0.0748293 | 3.328977  | ARSG        | 0.022478156 |
| 16369 | 0.01      | 0.4454096 | ZNF32-AS2   | 0.022451245 |
| 16370 | 0.01      | 0.4463961 | RNASE1      | 0.022401629 |
| 16371 | 0.1285095 | 5.7377959 | DSP         | 0.022397007 |
| 16372 | 0.01      | 0.4484536 | FAM154B     | 0.022298852 |
| 16373 | 0.01      | 0.4488816 | PRKCG       | 0.022277588 |
| 16374 | 0.01      | 0.4498836 | CHST13      | 0.022227972 |
| 16375 | 0.01      | 0.4501348 | GAL3ST1     | 0.022215568 |
| 16376 | 0.01      | 0.450746  | EFS         | 0.022185444 |
| 16377 | 0.01      | 0.45089   | ENO1-AS1    | 0.022178356 |
| 16378 | 0.01      | 0.4539366 | CYP11B1-AS1 | 0.022029508 |
| 16379 | 0.01      | 0.4539366 | C8G         | 0.022029508 |
| 16380 | 0.01      | 0.4549613 | GDF10       | 0.021979892 |
| 16381 | 0.01      | 0.4559906 | ACAN        | 0.021930276 |

|       |           |           |              |             |
|-------|-----------|-----------|--------------|-------------|
| 16382 | 0.01      | 0.4566264 | ANKRD6       | 0.021899743 |
| 16383 | 0.1167131 | 5.337414  | ADCY1        | 0.021866967 |
| 16384 | 0.01      | 0.4591067 | HIST1H2AJ    | 0.021781428 |
| 16385 | 0.1475395 | 6.7777152 | EPB49        | 0.021768319 |
| 16386 | 0.01      | 0.4598686 | SYTL5        | 0.021745344 |
| 16387 | 0.01      | 0.4612079 | HIST1H2BI    | 0.021682196 |
| 16388 | 0.01      | 0.4612079 | KLK1         | 0.021682196 |
| 16389 | 1.3810437 | 63.709956 | MGST1        | 0.021677048 |
| 16390 | 0.01      | 0.4633284 | HIST1H2BE    | 0.021582964 |
| 16391 | 0.01      | 0.4634468 | CDH22        | 0.021577451 |
| 16392 | 0.01      | 0.464396  | ZNF32-AS1    | 0.021533348 |
| 16393 | 0.01      | 0.4658271 | ACTR3C       | 0.021467194 |
| 16394 | 0.01      | 0.4661144 | MSX2P1       | 0.021453963 |
| 16395 | 0.01      | 0.4665459 | RFPL4AL1     | 0.021434116 |
| 16396 | 0.01      | 0.4687159 | HAMP         | 0.021334884 |
| 16397 | 0.01      | 0.4689886 | CBWD6        | 0.02132248  |
| 16398 | 0.01      | 0.4698085 | SCGB1D1      | 0.021285268 |
| 16399 | 0.01      | 0.4709062 | DIP2A-IT1    | 0.021235652 |
| 16400 | 0.01      | 0.4718511 | CTTNBP2      | 0.021193124 |
| 16401 | 0.01      | 0.473117  | HTRA4        | 0.02113642  |
| 16402 | 0.193201  | 9.1556037 | EFNB3        | 0.021101942 |
| 16403 | 0.0453733 | 2.1501948 | TNFRSF11A    | 0.021101942 |
| 16404 | 8.3483479 | 398.11182 | EEF1A2       | 0.020969857 |
| 16405 | 0.01      | 0.4791153 | RASGRP1      | 0.020871802 |
| 16406 | 0.3219354 | 15.463764 | THBS2        | 0.020818695 |
| 16407 | 0.01      | 0.4810211 | NCOR1P1      | 0.020789108 |
| 16408 | 0.0648613 | 3.1364433 | RASL10B      | 0.020679903 |
| 16409 | 0.01      | 0.4839084 | NBPF4        | 0.020665068 |
| 16410 | 0.01      | 0.4854775 | KCNJ2        | 0.020598277 |
| 16411 | 0.01      | 0.4856575 | KCNJ4        | 0.020590644 |
| 16412 | 0.01      | 0.4856575 | IGFBP1       | 0.020590644 |
| 16413 | 0.01      | 0.4878617 | PLD5         | 0.020497614 |
| 16414 | 0.01      | 0.4886008 | C1QTNF9B-AS1 | 0.020466604 |
| 16415 | 0.01      | 0.4891938 | HIST4H4      | 0.020441796 |
| 16416 | 0.01      | 0.4893918 | COMP         | 0.020433527 |
| 16417 | 0.01      | 0.4919801 | FAM124A      | 0.020326025 |
| 16418 | 0.01      | 0.4930834 | FLJ33534     | 0.020280544 |
| 16419 | 0.0635558 | 3.134779  | SLC47A1      | 0.020274415 |
| 16420 | 0.01      | 0.4947098 | PGR          | 0.020213873 |
| 16421 | 0.01      | 0.4954064 | CLSTN2       | 0.020185447 |
| 16422 | 0.01      | 0.497158  | CES1         | 0.02011433  |
| 16423 | 0.01      | 0.4981303 | TFCP2L1      | 0.020075069 |
| 16424 | 0.01      | 0.5004292 | CCDC78       | 0.019982848 |

|       |           |           |              |             |
|-------|-----------|-----------|--------------|-------------|
| 16425 | 0.01      | 0.5013628 | CLVS2        | 0.019945636 |
| 16426 | 0.01      | 0.5026131 | ENTPD3       | 0.01989602  |
| 16427 | 0.01      | 0.5042899 | CCDC169      | 0.019829865 |
| 16428 | 0.139491  | 7.1499571 | CTSH         | 0.019509343 |
| 16429 | 0.0555584 | 2.8477835 | ELFN1        | 0.019509343 |
| 16430 | 0.01      | 0.5158446 | MMP13        | 0.019385684 |
| 16431 | 0.01      | 0.5168777 | GRID1        | 0.019346936 |
| 16432 | 0.01      | 0.5207955 | PROM1        | 0.019201396 |
| 16433 | 0.01      | 0.5216942 | OR7E14P      | 0.019168319 |
| 16434 | 0.0487256 | 2.5446771 | HPCAL4       | 0.019148058 |
| 16435 | 0.01      | 0.5251206 | LPHN3        | 0.019043245 |
| 16436 | 0.01      | 0.5273821 | OLIG1        | 0.018961585 |
| 16437 | 0.4219562 | 22.308558 | KCNC4        | 0.018914546 |
| 16438 | 0.01      | 0.5301101 | TMEM163      | 0.018864007 |
| 16439 | 0.0196919 | 1.047447  | RIMKLA       | 0.018799913 |
| 16440 | 0.1362534 | 7.2475525 | ADAM23       | 0.018799912 |
| 16441 | 0.01      | 0.5331954 | TNRC18P1     | 0.018754852 |
| 16442 | 0.01      | 0.5353196 | LINC00634    | 0.018680428 |
| 16443 | 0.01      | 0.5360315 | RASL10A      | 0.01865562  |
| 16444 | 0.01      | 0.538898  | ZDHHC11      | 0.018556388 |
| 16445 | 0.01      | 0.5413587 | LRRC4        | 0.018472041 |
| 16446 | 0.01      | 0.5496759 | KRTAP4-9     | 0.018192537 |
| 16447 | 0.01      | 0.5508653 | TNK1         | 0.018153258 |
| 16448 | 0.068395  | 3.7703404 | HOXB13       | 0.018140266 |
| 16449 | 0.0769854 | 4.2438963 | STK33        | 0.018140266 |
| 16450 | 0.01      | 0.5552282 | NBL1         | 0.018010612 |
| 16451 | 0.01      | 0.5559941 | PLAC8L1      | 0.017985804 |
| 16452 | 0.01      | 0.556762  | FAM25A       | 0.017960996 |
| 16453 | 0.3596505 | 20.24348  | CHD7         | 0.01776624  |
| 16454 | 0.01      | 0.5635075 | ZNF295-AS1   | 0.017745993 |
| 16455 | 0.01      | 0.5642964 | GAP43        | 0.017721185 |
| 16456 | 0.01      | 0.5653516 | FXYP7        | 0.017688108 |
| 16457 | 0.01      | 0.565616  | PYY          | 0.017679838 |
| 16458 | 0.01      | 0.5661456 | SMKR1        | 0.0176633   |
| 16459 | 0.01      | 0.5664639 | TMEM145      | 0.017653376 |
| 16460 | 0.01      | 0.5669419 | IL17B        | 0.017638492 |
| 16461 | 0.01      | 0.567474  | LOC100506343 | 0.017621953 |
| 16462 | 0.01      | 0.5685412 | LOC100133669 | 0.017588876 |
| 16463 | 0.01      | 0.5698808 | RTN4RL1      | 0.017547529 |
| 16464 | 0.01      | 0.5698808 | PTCHD1       | 0.017547529 |
| 16465 | 0.01      | 0.570654  | SPEF2        | 0.017523755 |
| 16466 | 0.01      | 0.5748655 | CA3          | 0.017395373 |
| 16467 | 0.01      | 0.5749    | ANO5         | 0.017394329 |

|       |           |           |           |             |
|-------|-----------|-----------|-----------|-------------|
| 16468 | 0.01      | 0.5753031 | CCDC144CP | 0.017382142 |
| 16469 | 0.01      | 0.5833512 | PLAC9     | 0.017142331 |
| 16470 | 0.1450913 | 8.4660386 | GALNT16   | 0.017138042 |
| 16471 | 0.01      | 0.5849031 | ATP8A1    | 0.01709685  |
| 16472 | 0.01      | 0.58899   | DOK6      | 0.016978217 |
| 16473 | 0.042574  | 2.5116279 | LHFPL4    | 0.01695074  |
| 16474 | 0.0599538 | 3.5369444 | CPNE8     | 0.01695074  |
| 16475 | 0.01      | 0.5904722 | OR7E2P    | 0.016935598 |
| 16476 | 0.01      | 0.5907607 | RUNDC3A   | 0.016927329 |
| 16477 | 0.01      | 0.5935813 | DOCK8     | 0.016846891 |
| 16478 | 0.821117  | 48.759014 | STMN3     | 0.016840312 |
| 16479 | 0.01      | 0.596884  | FUT8-AS1  | 0.016753673 |
| 16480 | 0.01      | 0.6011227 | FLJ35282  | 0.016635539 |
| 16481 | 0.01      | 0.6016354 | NBPF22P   | 0.016621363 |
| 16482 | 0.01      | 0.6026634 | NPNT      | 0.016593011 |
| 16483 | 0.069839  | 4.2214278 | DNAJC6    | 0.016543923 |
| 16484 | 0.01      | 0.6060577 | KIRREL2   | 0.01650008  |
| 16485 | 0.01      | 0.6070718 | ZNF385B   | 0.016472515 |
| 16486 | 0.087306  | 5.3194446 | MMP9      | 0.016412622 |
| 16487 | 0.0592044 | 3.6072484 | BTNL9     | 0.016412622 |
| 16488 | 0.01      | 0.6118207 | MYO18B    | 0.016344659 |
| 16489 | 0.01      | 0.6119874 | ANKRD34B  | 0.016340206 |
| 16490 | 0.2871835 | 17.682884 | CCND2     | 0.016240762 |
| 16491 | 0.01      | 0.6182449 | KHDC1L    | 0.016174819 |
| 16492 | 1.0654371 | 65.946126 | G0S2      | 0.016156175 |
| 16493 | 0.059154  | 3.6613858 | CHSY3     | 0.016156174 |
| 16494 | 0.0711261 | 4.4024103 | NKAIN1    | 0.016156174 |
| 16495 | 0.01      | 0.6217871 | FLJ44635  | 0.016082675 |
| 16496 | 0.01      | 0.6232154 | SLC24A5   | 0.016045818 |
| 16497 | 0.01      | 0.6255365 | ISLR2     | 0.015986278 |
| 16498 | 0.0565995 | 3.5580147 | RADIL     | 0.015907618 |
| 16499 | 0.01      | 0.633002  | VAV3      | 0.015797738 |
| 16500 | 0.01      | 0.6356153 | CREG2     | 0.015732786 |
| 16501 | 0.2604994 | 16.57731  | TIE1      | 0.015714212 |
| 16502 | 0.0526927 | 3.3633775 | SLC16A6   | 0.015666594 |
| 16503 | 0.01      | 0.6391581 | LRRC34    | 0.015645582 |
| 16504 | 0.01      | 0.639327  | SEC14L6   | 0.015641447 |
| 16505 | 0.01      | 0.6418721 | ARHGDIG   | 0.015579427 |
| 16506 | 0.01      | 0.6418721 | TJP3      | 0.015579427 |
| 16507 | 0.01      | 0.6423836 | TREX2     | 0.015567023 |
| 16508 | 0.01      | 0.6444376 | RAI2      | 0.015517407 |
| 16509 | 0.01      | 0.6480638 | OVOL2     | 0.015430579 |
| 16510 | 0.01      | 0.6484429 | MAT1A     | 0.015421558 |



|       |           |           |              |             |
|-------|-----------|-----------|--------------|-------------|
| 16511 | 0.01      | 0.6485852 | NME5         | 0.015418175 |
| 16512 | 0.01      | 0.6501543 | RLN2         | 0.015380963 |
| 16513 | 0.01      | 0.6514523 | PPP1R9A      | 0.015350318 |
| 16514 | 0.01      | 0.6533156 | LCE3D        | 0.015306539 |
| 16515 | 0.01      | 0.6554402 | LOC100302640 | 0.015256923 |
| 16516 | 0.0759681 | 4.9959915 | SORL1        | 0.015205811 |
| 16517 | 0.1916493 | 12.640761 | NPTX1        | 0.015161219 |
| 16518 | 0.01      | 0.6669038 | EMBP1        | 0.014994667 |
| 16519 | 0.01      | 0.6704852 | POU3F3       | 0.014914573 |
| 16520 | 0.1490697 | 9.9956968 | WNK4         | 0.014913392 |
| 16521 | 0.01      | 0.6735725 | KCND3        | 0.014846213 |
| 16522 | 0.01      | 0.6736225 | RPRM         | 0.01484511  |
| 16523 | 0.01      | 0.6800433 | SLC35D3      | 0.014704945 |
| 16524 | 0.01      | 0.6814805 | FAM150A      | 0.014673935 |
| 16525 | 0.3566449 | 24.374298 | LOC100128881 | 0.014632007 |
| 16526 | 0.01      | 0.6855369 | LOC100507424 | 0.014587107 |
| 16527 | 0.0606871 | 4.1671221 | NTNG1        | 0.014563312 |
| 16528 | 0.01      | 0.6887426 | BMPR1B       | 0.014519211 |
| 16529 | 0.01      | 0.6954722 | HCN4         | 0.01437872  |
| 16530 | 0.1648078 | 11.476034 | SLC29A2      | 0.014361044 |
| 16531 | 0.0405525 | 2.8237877 | ERG          | 0.014361044 |
| 16532 | 0.5072604 | 35.485503 | BGN          | 0.014294864 |
| 16533 | 0.01      | 0.699576  | PRSS16       | 0.014294372 |
| 16534 | 0.01      | 0.7001228 | ZNF891       | 0.014283209 |
| 16535 | 0.01      | 0.701036  | EEF1DP3      | 0.014264603 |
| 16536 | 0.01      | 0.7047128 | FAM19A3      | 0.014190179 |
| 16537 | 0.01      | 0.7071854 | CHST9        | 0.014140563 |
| 16538 | 0.01      | 0.7198137 | WIF1         | 0.013892483 |
| 16539 | 0.3868461 | 27.952671 | MLPH         | 0.013839323 |
| 16540 | 0.01      | 0.723366  | MRAP2        | 0.013824261 |
| 16541 | 0.01      | 0.7249923 | ALOX12B      | 0.013793251 |
| 16542 | 0.0350487 | 2.5422281 | BCL11A       | 0.013786602 |
| 16543 | 0.01      | 0.7254272 | TIMP4        | 0.013784981 |
| 16544 | 0.01      | 0.7262985 | MYT1         | 0.013768443 |
| 16545 | 0.01      | 0.7262985 | SMIM1        | 0.013768443 |
| 16546 | 0.01      | 0.7262985 | MLLT10P1     | 0.013768443 |
| 16547 | 0.01      | 0.7264855 | GABRD        | 0.013764899 |
| 16548 | 0.01      | 0.7276096 | RASGEF1C     | 0.013743635 |
| 16549 | 0.01      | 0.729695  | RAPGEF5      | 0.013704355 |
| 16550 | 0.01      | 0.7336635 | CNKS2        | 0.013630227 |
| 16551 | 0.01      | 0.7336794 | ADCYAP1R1    | 0.013629931 |
| 16552 | 0.372641  | 27.389605 | SERPIND1     | 0.0136052   |
| 16553 | 0.01      | 0.7355761 | NBEAP1       | 0.013594787 |

|       |           |           |          |             |
|-------|-----------|-----------|----------|-------------|
| 16554 | 0.01      | 0.7372884 | RBFOX3   | 0.013563213 |
| 16555 | 0.0953119 | 7.0516397 | JPH1     | 0.013516277 |
| 16556 | 0.01      | 0.7446349 | FCER2    | 0.0134294   |
| 16557 | 0.0826654 | 6.1559636 | OLIG2    | 0.013428509 |
| 16558 | 0.01      | 0.7471246 | CAMK2B   | 0.013384648 |
| 16559 | 0.01      | 0.7508261 | FGF12    | 0.013318663 |
| 16560 | 0.01      | 0.7532934 | SLC27A2  | 0.013275039 |
| 16561 | 0.0789691 | 5.9570792 | NRARP    | 0.013256348 |
| 16562 | 0.01      | 0.7554672 | ANO2     | 0.013236843 |
| 16563 | 0.2906548 | 21.995982 | GALNT14  | 0.013213996 |
| 16564 | 0.01      | 0.7568451 | NTRK1    | 0.013212743 |
| 16565 | 0.01      | 0.7589668 | ZNF354C  | 0.013175807 |
| 16566 | 0.01      | 0.7612761 | ONECUT1  | 0.013135839 |
| 16567 | 0.01      | 0.7673141 | SHH      | 0.013032472 |
| 16568 | 0.01      | 0.7685333 | ZNF736   | 0.013011799 |
| 16569 | 0.01      | 0.7690569 | FLVCR2   | 0.013002939 |
| 16570 | 0.01      | 0.771229  | SMCP     | 0.012966317 |
| 16571 | 0.3088163 | 23.843275 | BMP7     | 0.012951923 |
| 16572 | 0.01      | 0.7733993 | C3orf80  | 0.012929932 |
| 16573 | 0.040154  | 3.1067106 | TRPA1    | 0.01292494  |
| 16574 | 0.5792898 | 44.959596 | IGFBP2   | 0.012884675 |
| 16575 | 0.01      | 0.7771768 | SLC9A2   | 0.012867085 |
| 16576 | 0.01      | 0.777748  | HOXD10   | 0.012857635 |
| 16577 | 0.01      | 0.7903837 | C19orf81 | 0.012652083 |
| 16578 | 0.01      | 0.8010646 | ABLIM2   | 0.012483388 |
| 16579 | 0.0284272 | 2.2818812 | ASTN1    | 0.012457773 |
| 16580 | 0.01      | 0.8072677 | SLC6A1   | 0.012387464 |
| 16581 | 0.5357314 | 43.262841 | GAL      | 0.012383176 |
| 16582 | 0.01      | 0.8098356 | HOXD1    | 0.012348184 |
| 16583 | 0.01      | 0.8174015 | TSGA10IP | 0.01223389  |
| 16584 | 0.01      | 0.8186346 | MTRNR2L4 | 0.012215462 |
| 16585 | 0.01      | 0.8201337 | MPZL3    | 0.012193134 |
| 16586 | 0.0979091 | 8.0486573 | SLC7A8   | 0.012164649 |
| 16587 | 0.01      | 0.8245139 | CPLX1    | 0.012128358 |
| 16588 | 0.01      | 0.8260158 | SYT3     | 0.012106306 |
| 16589 | 0.01      | 0.8265804 | LBX2     | 0.012098037 |
| 16590 | 0.01      | 0.8272589 | IGSF9B   | 0.012088114 |
| 16591 | 0.01      | 0.8380368 | PDE2A    | 0.01193265  |
| 16592 | 0.01      | 0.8420153 | TTPA     | 0.011876269 |
| 16593 | 0.2549007 | 21.482472 | LPHN2    | 0.011865518 |
| 16594 | 0.01      | 0.8472847 | SLCO5A1  | 0.011802408 |
| 16595 | 0.0698156 | 5.9417791 | SETD6    | 0.011749945 |
| 16596 | 0.01      | 0.8531126 | OR2W3    | 0.011721782 |

|       |           |           |              |             |
|-------|-----------|-----------|--------------|-------------|
| 16597 | 0.01      | 0.8540163 | SNORA58      | 0.011709378 |
| 16598 | 0.01      | 0.8564356 | LINC00659    | 0.011676301 |
| 16599 | 0.01      | 0.8625443 | NPPC         | 0.011593608 |
| 16600 | 0.01      | 0.8635709 | CAMSAP3      | 0.011579825 |
| 16601 | 0.01      | 0.8656679 | SYT9         | 0.011551775 |
| 16602 | 0.01      | 0.8717467 | LOC100499227 | 0.011471222 |
| 16603 | 0.01      | 0.8738771 | SOX21        | 0.011443256 |
| 16604 | 0.01      | 0.8746652 | PROK2        | 0.011432946 |
| 16605 | 0.01      | 0.8750268 | RSPH1        | 0.011428221 |
| 16606 | 0.01      | 0.8774253 | ZNF605       | 0.011396981 |
| 16607 | 0.0534495 | 4.7039893 | GDAP1        | 0.011362584 |
| 16608 | 0.01      | 0.8927922 | CRYBA2       | 0.011200814 |
| 16609 | 0.01      | 0.8940652 | EPS8L2       | 0.011184866 |
| 16610 | 0.01      | 0.8987641 | FBXL21       | 0.01112639  |
| 16611 | 0.01      | 0.9007725 | LOC100506321 | 0.011101582 |
| 16612 | 0.2158015 | 19.514056 | LAMA1        | 0.011058772 |
| 16613 | 0.01      | 0.9126006 | SLITRK2      | 0.010957696 |
| 16614 | 0.01      | 0.9167677 | CHRFAM7A     | 0.010907889 |
| 16615 | 0.1252777 | 11.510096 | RTN1         | 0.01088416  |
| 16616 | 0.01      | 0.9207603 | UBE2QL1      | 0.01086059  |
| 16617 | 0.01      | 0.9281978 | HS6ST3       | 0.010773565 |
| 16618 | 0.0556474 | 5.1665136 | PDZD4        | 0.010770783 |
| 16619 | 0.0837619 | 7.7767658 | LRRC33       | 0.010770783 |
| 16620 | 0.1136311 | 10.549942 | HOXB8        | 0.010770783 |
| 16621 | 0.01      | 0.9322287 | FLJ42102     | 0.010726981 |
| 16622 | 0.01      | 0.9349857 | FAM198A      | 0.010695351 |
| 16623 | 0.0201372 | 1.889085  | MED12L       | 0.010659744 |
| 16624 | 0.01      | 0.9439017 | FAM184A      | 0.010594324 |
| 16625 | 0.01      | 0.9498014 | TGFB3        | 0.010528517 |
| 16626 | 0.01      | 0.9518198 | EFCAB3       | 0.01050619  |
| 16627 | 0.01      | 0.9541981 | FEV          | 0.010480004 |
| 16628 | 0.01      | 0.9552031 | CLPSL2       | 0.010468978 |
| 16629 | 0.01      | 0.9555265 | NAT16        | 0.010465434 |
| 16630 | 0.01      | 0.9597517 | SCARNA2      | 0.010419362 |
| 16631 | 0.01      | 0.9666563 | SPATA17      | 0.010344938 |
| 16632 | 0.01      | 0.9674297 | SYT6         | 0.010336669 |
| 16633 | 0.01      | 0.9719004 | GRAMD2       | 0.01028912  |
| 16634 | 0.01      | 0.972938  | FAM124B      | 0.010278147 |
| 16635 | 0.01      | 0.9729896 | IRF5         | 0.010277602 |
| 16636 | 0.01      | 0.9732337 | WNK2         | 0.010275025 |
| 16637 | 0.01      | 0.9736611 | LOC387895    | 0.010270514 |
| 16638 | 0.01      | 0.977956  | CYP26B1      | 0.010225409 |
| 16639 | 0.01      | 0.9797465 | NEURL2       | 0.010206722 |

|       |           |           |              |             |
|-------|-----------|-----------|--------------|-------------|
| 16640 | 0.01      | 0.9827915 | CHGB         | 0.010175099 |
| 16641 | 0.01      | 0.9831602 | SNORA73B     | 0.010171282 |
| 16642 | 0.01      | 0.9856909 | SCUBE1       | 0.010145168 |
| 16643 | 0.1496048 | 14.75799  | REEP6        | 0.010137208 |
| 16644 | 0.01      | 0.9889492 | GPR4         | 0.010111743 |
| 16645 | 0.01      | 0.9912189 | TOMM20L      | 0.010088589 |
| 16646 | 0.0393504 | 3.9198316 | EDA          | 0.010038788 |
| 16647 | 0.01      | 0.9993695 | CACNB4       | 0.010006309 |
| 16648 | 0.0636918 | 6.467764  | DNER         | 0.009847573 |
| 16649 | 0.01      | 1.0179184 | ANP32D       | 0.00982397  |
| 16650 | 0.01      | 1.0179184 | ERC2         | 0.00982397  |
| 16651 | 0.01      | 1.018314  | PDX1         | 0.009820153 |
| 16652 | 0.01      | 1.0184328 | RASL11B      | 0.009819008 |
| 16653 | 0.01      | 1.0225088 | OPRD1        | 0.009779867 |
| 16654 | 0.01      | 1.0226136 | B3GALT1      | 0.009778865 |
| 16655 | 0.01      | 1.0243855 | IL37         | 0.00976195  |
| 16656 | 0.01      | 1.0283053 | NKX2-1       | 0.009724738 |
| 16657 | 0.01      | 1.0378365 | RIMS2        | 0.009635429 |
| 16658 | 0.01      | 1.0442894 | GNAS-AS1     | 0.00957589  |
| 16659 | 0.1294809 | 13.649404 | SOX7         | 0.009486194 |
| 16660 | 0.01      | 1.0658268 | RAET1K       | 0.009382387 |
| 16661 | 0.01      | 1.067018  | LOC100129917 | 0.009371913 |
| 16662 | 0.01      | 1.0682748 | C17orf98     | 0.009360887 |
| 16663 | 0.01      | 1.0704362 | CLDN3        | 0.009341986 |
| 16664 | 0.01      | 1.0710272 | CNTFR        | 0.009336831 |
| 16665 | 1.695927  | 181.9623  | ESM1         | 0.009320211 |
| 16666 | 0.01      | 1.077796  | SCARNA16     | 0.009278194 |
| 16667 | 0.01      | 1.0873487 | KIT          | 0.009196682 |
| 16668 | 0.0566611 | 6.2469969 | NHSL2        | 0.009070133 |
| 16669 | 0.01      | 1.1080146 | OXER1        | 0.009025152 |
| 16670 | 0.0205219 | 2.2824227 | TEX15        | 0.008991262 |
| 16671 | 0.01      | 1.1123534 | SP6          | 0.008989948 |
| 16672 | 0.01      | 1.1144036 | CCM2L        | 0.00897341  |
| 16673 | 0.1652216 | 18.482321 | VAT1L        | 0.008939439 |
| 16674 | 0.01      | 1.1247573 | VWA1         | 0.008890807 |
| 16675 | 0.01      | 1.1250677 | LOC389895    | 0.008888354 |
| 16676 | 0.01      | 1.1272251 | C20orf201    | 0.008871343 |
| 16677 | 0.01      | 1.1280663 | PGM5-AS1     | 0.008864727 |
| 16678 | 0.01      | 1.1379321 | JAKMIP1      | 0.008787871 |
| 16679 | 0.01      | 1.142163  | FAM19A4      | 0.008755317 |
| 16680 | 0.01      | 1.1461865 | PGM5         | 0.008724584 |
| 16681 | 0.01      | 1.151702  | FAM162B      | 0.008682802 |
| 16682 | 0.01      | 1.1523006 | RTN4R        | 0.008678291 |

|       |           |           |           |             |
|-------|-----------|-----------|-----------|-------------|
| 16683 | 0.01      | 1.1579295 | GLB1L3    | 0.008636104 |
| 16684 | 0.01      | 1.1650165 | FAM209B   | 0.00858357  |
| 16685 | 0.01      | 1.1709388 | PAK3      | 0.008540156 |
| 16686 | 0.01      | 1.1740651 | RAB3C     | 0.008517415 |
| 16687 | 0.01      | 1.1763493 | FLJ42351  | 0.008500876 |
| 16688 | 0.01      | 1.1774947 | POU3F2    | 0.008492607 |
| 16689 | 0.01      | 1.180615  | OSTCP1    | 0.008470162 |
| 16690 | 0.01      | 1.1932327 | GDF6      | 0.008380595 |
| 16691 | 0.01      | 1.1973139 | GPR50     | 0.008352028 |
| 16692 | 0.01      | 1.2025528 | FABP4     | 0.008315643 |
| 16693 | 0.01      | 1.2049745 | HTR1F     | 0.008298931 |
| 16694 | 0.01      | 1.2050693 | LINC00853 | 0.008298278 |
| 16695 | 0.0494423 | 5.977101  | PKIA      | 0.008271961 |
| 16696 | 0.01      | 1.2228099 | GFI1      | 0.008177886 |
| 16697 | 0.01      | 1.2235245 | ZNF385D   | 0.00817311  |
| 16698 | 0.01      | 1.2236209 | SDHAP3    | 0.008172466 |
| 16699 | 0.4704278 | 57.780083 | MT1L      | 0.008141694 |
| 16700 | 0.01      | 1.230682  | ABI3      | 0.008125576 |
| 16701 | 0.01      | 1.2351526 | FSHR      | 0.008096165 |
| 16702 | 0.01      | 1.235858  | BMP4      | 0.008091544 |
| 16703 | 0.01      | 1.2370319 | CEBPA-AS1 | 0.008083866 |
| 16704 | 0.01      | 1.2405489 | SYNDIG1   | 0.008060948 |
| 16705 | 0.01      | 1.2537969 | SERPINI1  | 0.007975774 |
| 16706 | 0.01      | 1.2557498 | ESPN      | 0.00796337  |
| 16707 | 0.01      | 1.2557498 | VAX1      | 0.00796337  |
| 16708 | 0.01      | 1.2573925 | ACE       | 0.007952966 |
| 16709 | 0.01      | 1.2574574 | PPP1R16B  | 0.007952556 |
| 16710 | 0.01      | 1.2669836 | CCDC68    | 0.007892762 |
| 16711 | 0.01      | 1.2675965 | HIST1H3I  | 0.007888946 |
| 16712 | 0.01      | 1.2682101 | IGSF5     | 0.007885129 |
| 16713 | 0.01      | 1.2725989 | LOC729041 | 0.007857936 |
| 16714 | 0.01      | 1.2804079 | B4GALNT4  | 0.007810011 |
| 16715 | 0.2016444 | 25.839468 | GYPC      | 0.007803737 |
| 16716 | 0.01      | 1.2886691 | LOC729737 | 0.007759944 |
| 16717 | 0.01      | 1.3127302 | LMO2      | 0.007617711 |
| 16718 | 0.01      | 1.3173062 | ZNF467    | 0.00759125  |
| 16719 | 0.01      | 1.3354615 | BMP8B     | 0.007488048 |
| 16720 | 0.01      | 1.3510215 | RAB26     | 0.007401807 |
| 16721 | 0.01      | 1.3526701 | SNORA57   | 0.007392785 |
| 16722 | 0.01      | 1.3595133 | CKMT1A    | 0.007355573 |
| 16723 | 0.0246073 | 3.355561  | SLFN13    | 0.007333299 |
| 16724 | 0.01      | 1.377593  | FOXO4     | 0.007259038 |
| 16725 | 0.01      | 1.3804647 | SNORD15B  | 0.007243937 |

|       |           |           |           |             |
|-------|-----------|-----------|-----------|-------------|
| 16726 | 0.0718371 | 10.004443 | GABBR2    | 0.007180522 |
| 16727 | 0.0934946 | 13.020588 | FXVD6     | 0.007180522 |
| 16728 | 0.01      | 1.3974812 | LINC00471 | 0.007155731 |
| 16729 | 0.01      | 1.3980844 | RORB      | 0.007152644 |
| 16730 | 0.01      | 1.4001634 | COBL      | 0.007142023 |
| 16731 | 0.01      | 1.4012597 | RHOV      | 0.007136436 |
| 16732 | 0.01      | 1.4032922 | CHN2      | 0.007126099 |
| 16733 | 0.2114658 | 29.961197 | SPTBN2    | 0.007057988 |
| 16734 | 0.0600921 | 8.5431181 | FAM81A    | 0.007033981 |
| 16735 | 0.01      | 1.4294174 | RNU4-2    | 0.006995857 |
| 16736 | 0.1458359 | 20.874095 | MANEAL    | 0.006986454 |
| 16737 | 0.01      | 1.4352339 | LINC00240 | 0.006967505 |
| 16738 | 0.01      | 1.443426  | LOC283174 | 0.006927962 |
| 16739 | 0.0895187 | 12.9517   | KIAA1549L | 0.006911732 |
| 16740 | 0.01      | 1.448595  | TMEM74    | 0.006903241 |
| 16741 | 0.01      | 1.4504814 | SLC16A10  | 0.006894263 |
| 16742 | 0.01      | 1.4525971 | RPRML     | 0.006884221 |
| 16743 | 0.01      | 1.4711522 | SCARNA14  | 0.006797393 |
| 16744 | 0.01      | 1.4772468 | TRIM71    | 0.00676935  |
| 16745 | 0.01      | 1.4819695 | SNORA39   | 0.006747777 |
| 16746 | 0.01      | 1.4819695 | SNORA71B  | 0.006747777 |
| 16747 | 0.01      | 1.4819695 | SNORA65   | 0.006747777 |
| 16748 | 0.01      | 1.4837878 | CCL7      | 0.006739508 |
| 16749 | 0.01      | 1.492947  | SNORA48   | 0.006698161 |
| 16750 | 0.01      | 1.4969389 | THSD1     | 0.0066803   |
| 16751 | 0.01      | 1.5040884 | SNORA22   | 0.006648545 |
| 16752 | 0.01      | 1.5040884 | SCARNA18  | 0.006648545 |
| 16753 | 0.01      | 1.5040884 | SNORA14A  | 0.006648545 |
| 16754 | 0.01      | 1.509137  | GRM8      | 0.006626304 |
| 16755 | 0.01      | 1.5130637 | RPS6KL1   | 0.006609107 |
| 16756 | 0.1611752 | 24.394616 | VGF       | 0.006606998 |
| 16757 | 0.01      | 1.5247774 | EMX2      | 0.006558334 |
| 16758 | 0.01      | 1.5268776 | SNORA51   | 0.006549313 |
| 16759 | 0.01      | 1.5268776 | SNORA72   | 0.006549313 |
| 16760 | 0.01      | 1.5268776 | ALX1      | 0.006549313 |
| 16761 | 0.0841338 | 12.937468 | TUSC1     | 0.006503114 |
| 16762 | 0.01      | 1.5381283 | KCNK5     | 0.006501408 |
| 16763 | 0.01      | 1.5385332 | SNORA11   | 0.006499697 |
| 16764 | 0.01      | 1.5385332 | SNORA24   | 0.006499697 |
| 16765 | 0.01      | 1.5511297 | LAMC3     | 0.006446914 |
| 16766 | 0.01      | 1.5557534 | CEBPA     | 0.006427754 |
| 16767 | 0.144903  | 22.5904   | NUP210    | 0.006414362 |
| 16768 | 0.01      | 1.5593644 | VSTM1     | 0.006412869 |

|       |           |           |              |             |
|-------|-----------|-----------|--------------|-------------|
| 16769 | 0.01      | 1.5675944 | IRAK1BP1     | 0.006379201 |
| 16770 | 0.01      | 1.572545  | ST3GAL6-AS1  | 0.006359119 |
| 16771 | 0.01      | 1.5779547 | RIBC2        | 0.006337318 |
| 16772 | 0.01      | 1.5845649 | SCN4B        | 0.006310881 |
| 16773 | 0.0211638 | 3.3567429 | UNC13A       | 0.006304848 |
| 16774 | 0.01      | 1.5901211 | ACTL10       | 0.006288829 |
| 16775 | 0.01      | 1.5943757 | ZNF718       | 0.006272047 |
| 16776 | 0.0608288 | 9.7067702 | AMPH         | 0.006266637 |
| 16777 | 0.01      | 1.5964186 | PARVG        | 0.006264021 |
| 16778 | 0.0319239 | 5.1251444 | MOB3B        | 0.006228887 |
| 16779 | 0.01      | 1.6123828 | SCARNA22     | 0.006202001 |
| 16780 | 0.01      | 1.6207179 | FAM201A      | 0.006170105 |
| 16781 | 0.01      | 1.631023  | GATA5        | 0.006131121 |
| 16782 | 0.0904119 | 14.777261 | MYEOV        | 0.006118315 |
| 16783 | 0.042306  | 6.9146541 | RRAGD        | 0.006118315 |
| 16784 | 0.01      | 1.6372352 | ZNF704       | 0.006107858 |
| 16785 | 0.01      | 1.6489125 | RNF175       | 0.006064603 |
| 16786 | 0.01      | 1.6634673 | ANKRD18A     | 0.00601154  |
| 16787 | 0.01      | 1.6851295 | LGI2         | 0.005934262 |
| 16788 | 0.01      | 1.6920066 | SAMD15       | 0.005910142 |
| 16789 | 0.01      | 1.6936794 | CACNA2D3     | 0.005904305 |
| 16790 | 0.01      | 1.6980862 | ONECUT2      | 0.005888983 |
| 16791 | 0.01      | 1.7123861 | WT1-AS       | 0.005839804 |
| 16792 | 0.01      | 1.727553  | TCF24        | 0.005788534 |
| 16793 | 0.01      | 1.7285407 | LOC100288842 | 0.005785227 |
| 16794 | 0.01      | 1.7374814 | GABRA2       | 0.005755457 |
| 16795 | 0.0518665 | 9.0791838 | JPH3         | 0.00571268  |
| 16796 | 0.0893396 | 15.667623 | AK4          | 0.005702179 |
| 16797 | 0.134625  | 23.696194 | NPDC1        | 0.005681292 |
| 16798 | 0.01      | 1.7623421 | GPR162       | 0.005674267 |
| 16799 | 0.01      | 1.7691573 | FAM78B       | 0.005652409 |
| 16800 | 0.01      | 1.780458  | LXN          | 0.005616532 |
| 16801 | 0.01      | 1.7964498 | FOXL2        | 0.005566535 |
| 16802 | 0.01      | 1.8025792 | PAX2         | 0.005547606 |
| 16803 | 0.1391185 | 25.159845 | BARX1        | 0.005529386 |
| 16804 | 0.01      | 1.812606  | TFR2         | 0.005516919 |
| 16805 | 0.01      | 1.8225879 | PIP5K1B      | 0.005486704 |
| 16806 | 0.01      | 1.8236323 | BEGAIN       | 0.005483561 |
| 16807 | 0.01      | 1.8310642 | C14orf37     | 0.005461305 |
| 16808 | 0.01      | 1.8661838 | MUM1L1       | 0.005358529 |
| 16809 | 0.01      | 1.8705137 | FBXO2        | 0.005346125 |
| 16810 | 0.01      | 1.8748637 | LCE1D        | 0.005333721 |
| 16811 | 0.01      | 1.8757361 | MAGEL2       | 0.00533124  |

|       |           |           |             |             |
|-------|-----------|-----------|-------------|-------------|
| 16812 | 0.01      | 1.8836247 | TMEM59L     | 0.005308913 |
| 16813 | 0.0452944 | 8.5420192 | PALD1       | 0.005302539 |
| 16814 | 0.01      | 1.886143  | C2orf81     | 0.005301825 |
| 16815 | 0.01      | 1.9013948 | MIR1248     | 0.005259297 |
| 16816 | 0.01      | 1.9161852 | CELF2       | 0.005218702 |
| 16817 | 0.01      | 1.9174742 | C1orf162    | 0.005215194 |
| 16818 | 0.01      | 1.9324949 | DRAXIN      | 0.005174658 |
| 16819 | 0.01      | 1.9353754 | UNC5A       | 0.005166956 |
| 16820 | 0.01      | 1.9426299 | DICER1-AS1  | 0.005147661 |
| 16821 | 0.01      | 1.9508564 | RELN        | 0.005125954 |
| 16822 | 0.01      | 1.9649512 | LMO1        | 0.005089185 |
| 16823 | 0.01      | 1.9680838 | TAL1        | 0.005081084 |
| 16824 | 0.01      | 1.9701647 | FOXA3       | 0.005075718 |
| 16825 | 0.01      | 1.9759593 | DLL1        | 0.005060833 |
| 16826 | 0.3117161 | 61.633379 | CDCP1       | 0.005057585 |
| 16827 | 0.01      | 2.0154785 | MIR658      | 0.004961601 |
| 16828 | 0.01      | 2.0317323 | LOC645249   | 0.004921908 |
| 16829 | 0.01      | 2.0330617 | PRIMA1      | 0.00491869  |
| 16830 | 0.01      | 2.0566107 | SNORD116-26 | 0.004862369 |
| 16831 | 0.01      | 2.0566107 | SNORD46     | 0.004862369 |
| 16832 | 0.01      | 2.0566107 | SNORD116-4  | 0.004862369 |
| 16833 | 0.01      | 2.0653921 | HLA-DRB5    | 0.004841696 |
| 16834 | 0.01      | 2.0778129 | MIR590      | 0.004812753 |
| 16835 | 0.01      | 2.0795995 | VAX2        | 0.004808618 |
| 16836 | 0.01      | 2.084259  | FAM159B     | 0.004797868 |
| 16837 | 0.0299511 | 6.3436301 | KIF5C       | 0.004721439 |
| 16838 | 0.0205786 | 4.3983484 | PTPRD       | 0.004678711 |
| 16839 | 0.01      | 2.1430897 | C12orf56    | 0.00466616  |
| 16840 | 0.01      | 2.144126  | SNORD116-22 | 0.004663905 |
| 16841 | 0.01      | 2.1581008 | PLCXD2      | 0.004633704 |
| 16842 | 0.01      | 2.1671812 | SNORD19B    | 0.004614289 |
| 16843 | 0.01      | 2.1718518 | MT1M        | 0.004604366 |
| 16844 | 0.0771279 | 16.783222 | EYA2        | 0.004595534 |
| 16845 | 0.01      | 2.2042143 | HOXD11      | 0.004536764 |
| 16846 | 0.01      | 2.2148115 | SNORD14B    | 0.004515057 |
| 16847 | 0.01      | 2.2155969 | TPBGL       | 0.004513456 |
| 16848 | 0.01      | 2.2196098 | ELMO1       | 0.004505296 |
| 16849 | 0.01      | 2.226102  | SEMA3F      | 0.004492157 |
| 16850 | 0.01      | 2.2266087 | PARM1       | 0.004491135 |
| 16851 | 0.01      | 2.2485054 | LRRC4B      | 0.004447399 |
| 16852 | 0.01      | 2.2555315 | ZFP92       | 0.004433545 |
| 16853 | 0.01      | 2.2645826 | MIR4497     | 0.004415825 |
| 16854 | 0.01      | 2.2645826 | MIR4721     | 0.004415825 |



|       |           |           |            |             |
|-------|-----------|-----------|------------|-------------|
| 16855 | 0.01      | 2.2916185 | WBSCR17    | 0.004363728 |
| 16856 | 0.01      | 2.2940405 | RAB39A     | 0.004359121 |
| 16857 | 0.01      | 2.3027774 | EFCAB4A    | 0.004342582 |
| 16858 | 0.01      | 2.303725  | DLGAP3     | 0.004340796 |
| 16859 | 0.01      | 2.3275246 | GRIN2D     | 0.00429641  |
| 16860 | 0.01      | 2.3435796 | MIR937     | 0.004266977 |
| 16861 | 0.01      | 2.3935507 | NELL2      | 0.004177894 |
| 16862 | 0.01      | 2.3952399 | TTC9       | 0.004174947 |
| 16863 | 0.01      | 2.3983217 | DMC1       | 0.004169582 |
| 16864 | 0.01      | 2.4035871 | RNF128     | 0.004160448 |
| 16865 | 0.01      | 2.4250409 | BARHL2     | 0.004123642 |
| 16866 | 0.01      | 2.4282873 | SNORD60    | 0.004118129 |
| 16867 | 0.01      | 2.4366752 | PI3        | 0.004103953 |
| 16868 | 0.01      | 2.4493662 | NPY        | 0.004082689 |
| 16869 | 0.01      | 2.4508085 | SLC35F1    | 0.004080286 |
| 16870 | 0.01      | 2.4579006 | MIR4712    | 0.004068513 |
| 16871 | 0.01      | 2.4729797 | PAQR9      | 0.004043705 |
| 16872 | 0.01      | 2.4786822 | HAAO       | 0.004034402 |
| 16873 | 0.01      | 2.5096954 | TESC       | 0.003984547 |
| 16874 | 0.01      | 2.5130654 | KCNJ8      | 0.003979204 |
| 16875 | 0.01      | 2.5193481 | CECR2      | 0.003969281 |
| 16876 | 0.01      | 2.5193481 | MIR4677    | 0.003969281 |
| 16877 | 0.0398851 | 10.067749 | DPYSL5     | 0.003961667 |
| 16878 | 0.01      | 2.5289274 | FAM174B    | 0.003954246 |
| 16879 | 0.01      | 2.5357837 | TLX1       | 0.003943554 |
| 16880 | 0.01      | 2.6164426 | SULT4A1    | 0.003821983 |
| 16881 | 0.01      | 2.6175045 | MIR4784    | 0.003820433 |
| 16882 | 0.01      | 2.6209083 | DBNDD2     | 0.003815471 |
| 16883 | 0.01      | 2.6446956 | ZNF215     | 0.003781153 |
| 16884 | 0.01      | 2.6763248 | ADORA1     | 0.003736467 |
| 16885 | 0.01      | 2.6808888 | LINGO1     | 0.003730106 |
| 16886 | 0.01      | 2.6944899 | HIST1H4H   | 0.003711278 |
| 16887 | 0.042969  | 11.594196 | WASF3      | 0.003706076 |
| 16888 | 0.01      | 2.7032668 | GJA3       | 0.003699228 |
| 16889 | 0.01      | 2.7694654 | NDNF       | 0.003610805 |
| 16890 | 0.01      | 2.7709773 | ICA1       | 0.003608835 |
| 16891 | 0.01      | 2.7871785 | MCM3AP-AS1 | 0.003587858 |
| 16892 | 0.01      | 2.8011582 | SLITRK5    | 0.003569952 |
| 16893 | 0.01      | 2.8776994 | STON2      | 0.003474998 |
| 16894 | 0.01      | 2.9423043 | SNORA5C    | 0.003398697 |
| 16895 | 0.01      | 3.0056134 | GJB2       | 0.003327108 |
| 16896 | 0.0275188 | 8.330183  | CCDC88C    | 0.003303499 |
| 16897 | 0.01      | 3.0307947 | SNORA9     | 0.003299465 |

|       |           |           |          |             |
|-------|-----------|-----------|----------|-------------|
| 16898 | 0.01      | 3.0537553 | SNORA41  | 0.003274657 |
| 16899 | 0.01      | 3.1007361 | SNORA1   | 0.003225041 |
| 16900 | 0.01      | 3.1007361 | SNORA3   | 0.003225041 |
| 16901 | 0.01      | 3.1450899 | TMEM121  | 0.003179559 |
| 16902 | 0.01      | 3.1818937 | GHR      | 0.003142783 |
| 16903 | 0.01      | 3.2013816 | C7orf29  | 0.003123651 |
| 16904 | 0.01      | 3.2070037 | RTP3     | 0.003118175 |
| 16905 | 0.01      | 3.2090767 | TENM4    | 0.003116161 |
| 16906 | 0.01      | 3.2736521 | CHMP4C   | 0.003054692 |
| 16907 | 0.01      | 3.2844834 | FAM155B  | 0.003044619 |
| 16908 | 0.0139912 | 4.6141535 | KIAA1244 | 0.003032244 |
| 16909 | 0.01      | 3.3251238 | FAM95C   | 0.003007407 |
| 16910 | 0.01      | 3.3313694 | SNORA32  | 0.003001769 |
| 16911 | 0.01      | 3.3756339 | TSPYL5   | 0.002962407 |
| 16912 | 0.01      | 3.4371835 | EPHB1    | 0.002909359 |
| 16913 | 0.01      | 3.4402422 | GRB14    | 0.002906772 |
| 16914 | 0.01      | 3.4452623 | MT1A     | 0.002902537 |
| 16915 | 0.01      | 3.4799628 | C2orf70  | 0.002873594 |
| 16916 | 0.01      | 3.5067849 | C10orf35 | 0.002851615 |
| 16917 | 0.01      | 3.5405713 | PDE3B    | 0.002824403 |
| 16918 | 0.01      | 3.6703092 | RTN4RL2  | 0.002724566 |
| 16919 | 0.01      | 3.718595  | ZIC5     | 0.002689188 |
| 16920 | 0.01      | 3.7587701 | P2RY1    | 0.002660445 |
| 16921 | 0.01      | 3.7672495 | BCHE     | 0.002654457 |
| 16922 | 0.01      | 3.7966494 | IRX1     | 0.002633901 |
| 16923 | 0.01      | 3.8842198 | TMEM204  | 0.00257452  |
| 16924 | 0.01      | 3.8949094 | ATP1A3   | 0.002567454 |
| 16925 | 0.01      | 3.9364814 | SH3GL3   | 0.00254034  |
| 16926 | 0.01      | 3.9547906 | IL13RA2  | 0.002528579 |
| 16927 | 0.1155849 | 46.614228 | HPDL     | 0.002479605 |
| 16928 | 0.01      | 4.0580103 | SNORA6   | 0.002464262 |
| 16929 | 0.0210632 | 8.5557    | CNTNAP2  | 0.002461893 |
| 16930 | 0.01      | 4.0656751 | EBF3     | 0.002459616 |
| 16931 | 0.01      | 4.0917127 | KCNQ2    | 0.002443964 |
| 16932 | 0.0225712 | 9.3646731 | KIF1A    | 0.002410245 |
| 16933 | 0.01      | 4.1593544 | IRX4     | 0.002404219 |
| 16934 | 0.01      | 4.1705424 | HAND2    | 0.00239777  |
| 16935 | 0.01      | 4.2078588 | QRFPR    | 0.002376506 |
| 16936 | 0.01      | 4.2441515 | SLC13A3  | 0.002356184 |
| 16937 | 0.01      | 4.2843731 | PPP1R14C | 0.002334064 |
| 16938 | 0.01      | 4.2894529 | ST3GAL6  | 0.0023313   |
| 16939 | 0.01      | 4.3074341 | DLX4     | 0.002321568 |
| 16940 | 0.01      | 4.3737358 | NRG2     | 0.002286375 |

|       |           |           |           |             |
|-------|-----------|-----------|-----------|-------------|
| 16941 | 0.01      | 4.4883402 | CACNG6    | 0.002227995 |
| 16942 | 0.01      | 4.5027996 | GLB1L2    | 0.002220841 |
| 16943 | 0.01      | 4.5299861 | LIN28B    | 0.002207512 |
| 16944 | 0.01      | 4.5530387 | RIPPLY2   | 0.002196335 |
| 16945 | 0.3430444 | 156.42767 | FOXR1     | 0.002192991 |
| 16946 | 0.01      | 4.5719738 | ALDH1A2   | 0.002187239 |
| 16947 | 0.01      | 4.5726388 | B4GALNT3  | 0.002186921 |
| 16948 | 0.01      | 4.6332838 | SNORD14D  | 0.002158296 |
| 16949 | 0.01      | 4.7943678 | ENHO      | 0.002085781 |
| 16950 | 0.01      | 4.8356009 | RIMS4     | 0.002067995 |
| 16951 | 0.01      | 4.8833179 | MERTK     | 0.002047788 |
| 16952 | 0.01      | 4.9016171 | AGTR1     | 0.002040143 |
| 16953 | 0.01      | 4.9278202 | TCF15     | 0.002029295 |
| 16954 | 0.01      | 4.950298  | WFDC2     | 0.00202008  |
| 16955 | 0.01      | 5.0828179 | SLAIN1    | 0.001967413 |
| 16956 | 0.01      | 5.1868931 | MNX1      | 0.001927936 |
| 16957 | 0.01      | 5.2391748 | NOVA2     | 0.001908698 |
| 16958 | 0.01      | 5.3382302 | HES7      | 0.00187328  |
| 16959 | 0.01      | 5.3518355 | BEND4     | 0.001868518 |
| 16960 | 0.01      | 5.3746093 | SNORD24   | 0.0018606   |
| 16961 | 0.01      | 5.3746093 | SNORD28   | 0.0018606   |
| 16962 | 0.1501437 | 81.098323 | PRAME     | 0.001851379 |
| 16963 | 0.01      | 5.4542588 | 3-Sep     | 0.00183343  |
| 16964 | 0.01      | 5.4569102 | PRKCQ-AS1 | 0.001832539 |
| 16965 | 0.01      | 5.4588431 | PRKCQ     | 0.00183189  |
| 16966 | 0.01      | 5.4777193 | ANKRD18B  | 0.001825577 |
| 16967 | 0.01      | 5.577035  | GATM      | 0.001793067 |
| 16968 | 0.01      | 5.6077142 | B3GAT1    | 0.001783258 |
| 16969 | 0.01      | 5.621151  | RSPO4     | 0.001778995 |
| 16970 | 0.01      | 5.7296211 | LCE1F     | 0.001745316 |
| 16971 | 0.01      | 5.755547  | SYN2      | 0.001737454 |
| 16972 | 0.01      | 5.8128909 | NOVA1     | 0.001720314 |
| 16973 | 0.01      | 5.9824235 | HID1      | 0.001671563 |
| 16974 | 0.01      | 6.0450615 | SNCB      | 0.001654243 |
| 16975 | 0.01      | 6.078171  | LRFN5     | 0.001645232 |
| 16976 | 0.01      | 6.1505212 | ZDHHC22   | 0.001625878 |
| 16977 | 0.01      | 6.3197653 | EMILIN3   | 0.001582337 |
| 16978 | 0.01      | 6.3983444 | BEX5      | 0.001562904 |
| 16979 | 0.01      | 6.6081261 | SNORA26   | 0.001513288 |
| 16980 | 0.01      | 6.6081261 | MSI1      | 0.001513288 |
| 16981 | 0.01      | 6.6364125 | WT1       | 0.001506838 |
| 16982 | 0.01      | 6.6596234 | ZNF296    | 0.001501586 |
| 16983 | 0.01      | 6.7010793 | CRABP1    | 0.001492297 |

|       |           |           |           |             |
|-------|-----------|-----------|-----------|-------------|
| 16984 | 0.01      | 6.7182616 | CDX2      | 0.00148848  |
| 16985 | 0.01      | 6.8395751 | LRFN1     | 0.001462079 |
| 16986 | 0.01      | 6.8729519 | LHX1      | 0.001454979 |
| 16987 | 0.01      | 6.9696251 | TNFRSF10A | 0.001434797 |
| 16988 | 0.01      | 7.0913401 | FAM189A1  | 0.001410171 |
| 16989 | 0.01      | 7.2482058 | KIF26A    | 0.001379652 |
| 16990 | 0.01      | 7.3686695 | GATA4     | 0.001357097 |
| 16991 | 0.01      | 7.3902436 | EMB       | 0.001353135 |
| 16992 | 0.01      | 7.5131288 | PRR9      | 0.001331003 |
| 16993 | 0.01      | 7.5769867 | SNORA33   | 0.001319786 |
| 16994 | 0.01      | 7.8470541 | PPP2R2C   | 0.001274364 |
| 16995 | 0.01      | 7.8617955 | GPR27     | 0.001271974 |
| 16996 | 0.01      | 7.9538039 | ISM1      | 0.00125726  |
| 16997 | 0.01      | 7.9793894 | SHANK1    | 0.001253229 |
| 16998 | 0.01      | 7.984021  | NKD2      | 0.001252502 |
| 16999 | 0.01      | 8.0106458 | OGDHL     | 0.001248339 |
| 17000 | 0.01      | 8.0974094 | CERS4     | 0.001234963 |
| 17001 | 0.0548131 | 47.603884 | IL10RA    | 0.001151442 |
| 17002 | 0.01      | 8.9430385 | EGFL7     | 0.001118188 |
| 17003 | 0.01      | 8.9442068 | APBB1IP   | 0.001118042 |
| 17004 | 0.01      | 9.2247974 | MATK      | 0.001084035 |
| 17005 | 0.01      | 9.3443446 | CITED1    | 0.001070166 |
| 17006 | 0.1178064 | 110.51521 | CSF3      | 0.001065974 |
| 17007 | 0.01      | 9.4926638 | ADD2      | 0.001053445 |
| 17008 | 0.01      | 9.848283  | NAT8L     | 0.001015405 |
| 17009 | 0.01      | 9.9539327 | SLC17A9   | 0.001004628 |
| 17010 | 0.01      | 10.227184 | PLBD1     | 0.000977786 |
| 17011 | 0.01      | 10.25254  | PRKCZ     | 0.000975368 |
| 17012 | 0.01      | 10.404031 | CA2       | 0.000961166 |
| 17013 | 0.01      | 10.629298 | RAB38     | 0.000940796 |
| 17014 | 0.0468735 | 52.540251 | EPB41L3   | 0.000892144 |
| 17015 | 0.01      | 11.274021 | CYTL1     | 0.000886995 |
| 17016 | 0.01      | 11.401198 | ESX1      | 0.000877101 |
| 17017 | 0.0505211 | 57.654899 | AEBP1     | 0.000876267 |
| 17018 | 0.01      | 12.52066  | TUBB4A    | 0.00079868  |
| 17019 | 0.01      | 13.018451 | GYLTL1B   | 0.000768141 |
| 17020 | 0.01      | 14.031299 | COL9A3    | 0.000712692 |
| 17021 | 0.01      | 14.05952  | DUSP9     | 0.000711262 |
| 17022 | 1.7024467 | 2450.8257 | MMP1      | 0.000694642 |
| 17023 | 0.01      | 14.428231 | MB21D1    | 0.000693086 |
| 17024 | 0.01      | 14.542347 | TMEM88    | 0.000687647 |
| 17025 | 0.01      | 14.744588 | MED12     | 0.000678215 |
| 17026 | 0.01      | 15.196923 | ZFP57     | 0.000658028 |

|       |           |           |            |             |
|-------|-----------|-----------|------------|-------------|
| 17027 | 0.01      | 15.459905 | KRT75      | 0.000646834 |
| 17028 | 0.01      | 16.490278 | LCE1E      | 0.000606418 |
| 17029 | 0.01      | 17.315525 | ABCA3      | 0.000577516 |
| 17030 | 0.01      | 18.085051 | ERVMER34-1 | 0.000552943 |
| 17031 | 0.01      | 20.845524 | MDFI       | 0.000479719 |
| 17032 | 0.01      | 20.924419 | MST4       | 0.000477911 |
| 17033 | 0.01      | 20.979715 | LRRC61     | 0.000476651 |
| 17034 | 0.01      | 24.042264 | NTSR1      | 0.000415934 |
| 17035 | 0.01      | 65.28285  | CYBA       | 0.00015318  |
| 17036 | 0.01      | 152.16728 | FABP5      | 6.57171E-05 |
| 16952 | 0.01      | 4.9016171 | AGTR1      | 0.002040143 |
| 16953 | 0.01      | 4.9278202 | TCF15      | 0.002029295 |
| 16954 | 0.01      | 4.950298  | WFDC2      | 0.00202008  |
| 16955 | 0.01      | 5.0828179 | SLAIN1     | 0.001967413 |
| 16956 | 0.01      | 5.1868931 | MNX1       | 0.001927936 |
| 16957 | 0.01      | 5.2391748 | NOVA2      | 0.001908698 |
| 16958 | 0.01      | 5.3382302 | HES7       | 0.00187328  |
| 16959 | 0.01      | 5.3518355 | BEND4      | 0.001868518 |
| 16960 | 0.01      | 5.3746093 | SNORD24    | 0.0018606   |
| 16961 | 0.01      | 5.3746093 | SNORD28    | 0.0018606   |
| 16962 | 0.1501437 | 81.098323 | PRAME      | 0.001851379 |
| 16963 | 0.01      | 5.4542588 | 3-Sep      | 0.00183343  |
| 16964 | 0.01      | 5.4569102 | PRKCQ-AS1  | 0.001832539 |
| 16965 | 0.01      | 5.4588431 | PRKCQ      | 0.00183189  |
| 16966 | 0.01      | 5.4777193 | ANKRD18B   | 0.001825577 |
| 16967 | 0.01      | 5.577035  | GATM       | 0.001793067 |
| 16968 | 0.01      | 5.6077142 | B3GAT1     | 0.001783258 |
| 16969 | 0.01      | 5.621151  | RSPO4      | 0.001778995 |
| 16970 | 0.01      | 5.7296211 | LCE1F      | 0.001745316 |
| 16971 | 0.01      | 5.755547  | SYN2       | 0.001737454 |
| 16972 | 0.01      | 5.8128909 | NOVA1      | 0.001720314 |
| 16973 | 0.01      | 5.9824235 | HID1       | 0.001671563 |
| 16974 | 0.01      | 6.0450615 | SNCB       | 0.001654243 |
| 16975 | 0.01      | 6.078171  | LRFN5      | 0.001645232 |
| 16976 | 0.01      | 6.1505212 | ZDHHC22    | 0.001625878 |
| 16977 | 0.01      | 6.3197653 | EMILIN3    | 0.001582337 |
| 16978 | 0.01      | 6.3983444 | BEX5       | 0.001562904 |
| 16979 | 0.01      | 6.6081261 | SNORA26    | 0.001513288 |
| 16980 | 0.01      | 6.6081261 | MSI1       | 0.001513288 |
| 16981 | 0.01      | 6.6364125 | WT1        | 0.001506838 |
| 16982 | 0.01      | 6.6596234 | ZNF296     | 0.001501586 |
| 16983 | 0.01      | 6.7010793 | CRABP1     | 0.001492297 |
| 16984 | 0.01      | 6.7182616 | CDX2       | 0.00148848  |

|       |           |           |           |             |
|-------|-----------|-----------|-----------|-------------|
| 16985 | 0.01      | 6.8395751 | LRFN1     | 0.001462079 |
| 16986 | 0.01      | 6.8729519 | LHX1      | 0.001454979 |
| 16987 | 0.01      | 6.9696251 | TNFRSF10A | 0.001434797 |
| 16988 | 0.01      | 7.0913401 | FAM189A1  | 0.001410171 |
| 16989 | 0.01      | 7.2482058 | KIF26A    | 0.001379652 |
| 16990 | 0.01      | 7.3686695 | GATA4     | 0.001357097 |
| 16991 | 0.01      | 7.3902436 | EMB       | 0.001353135 |
| 16992 | 0.01      | 7.5131288 | PRR9      | 0.001331003 |
| 16993 | 0.01      | 7.5769867 | SNORA33   | 0.001319786 |
| 16994 | 0.01      | 7.8470541 | PPP2R2C   | 0.001274364 |
| 16995 | 0.01      | 7.8617955 | GPR27     | 0.001271974 |
| 16996 | 0.01      | 7.9538039 | ISM1      | 0.00125726  |
| 16997 | 0.01      | 7.9793894 | SHANK1    | 0.001253229 |
| 16998 | 0.01      | 7.984021  | NKD2      | 0.001252502 |
| 16999 | 0.01      | 8.0106458 | OGDHL     | 0.001248339 |
| 17000 | 0.01      | 8.0974094 | CERS4     | 0.001234963 |
| 17001 | 0.0548131 | 47.603884 | IL10RA    | 0.001151442 |
| 17002 | 0.01      | 8.9430385 | EGFL7     | 0.001118188 |
| 17003 | 0.01      | 8.9442068 | APBB1IP   | 0.001118042 |
| 17004 | 0.01      | 9.2247974 | MATK      | 0.001084035 |
| 17005 | 0.01      | 9.3443446 | CITED1    | 0.001070166 |
| 17006 | 0.1178064 | 110.51521 | CSF3      | 0.001065974 |
| 17007 | 0.01      | 9.4926638 | ADD2      | 0.001053445 |
| 17008 | 0.01      | 9.848283  | NAT8L     | 0.001015405 |
| 17009 | 0.01      | 9.9539327 | SLC17A9   | 0.001004628 |
| 17010 | 0.01      | 10.227184 | PLBD1     | 0.000977786 |
| 17011 | 0.01      | 10.25254  | PRKCZ     | 0.000975368 |
| 17012 | 0.01      | 10.404031 | CA2       | 0.000961166 |
| 17013 | 0.01      | 10.629298 | RAB38     | 0.000940796 |
| 17014 | 0.0468735 | 52.540251 | EPB41L3   | 0.000892144 |
| 17015 | 0.01      | 11.274021 | CYTL1     | 0.000886995 |
| 17016 | 0.01      | 11.401198 | ESX1      | 0.000877101 |
| 17017 | 0.0505211 | 57.654899 | AEBP1     | 0.000876267 |
| 17018 | 0.01      | 12.52066  | TUBB4A    | 0.00079868  |
| 17019 | 0.01      | 13.018451 | GYLTL1B   | 0.000768141 |
| 17020 | 0.01      | 14.031299 | COL9A3    | 0.000712692 |
| 17021 | 0.01      | 14.05952  | DUSP9     | 0.000711262 |
| 17022 | 1.7024467 | 2450.8257 | MMP1      | 0.000694642 |
| 17023 | 0.01      | 14.428231 | MB21D1    | 0.000693086 |
| 17024 | 0.01      | 14.542347 | TMEM88    | 0.000687647 |
| 17025 | 0.01      | 14.744588 | MED12     | 0.000678215 |
| 17026 | 0.01      | 15.196923 | ZFP57     | 0.000658028 |
| 17027 | 0.01      | 15.459905 | KRT75     | 0.000646834 |

|       |           |           |            |             |
|-------|-----------|-----------|------------|-------------|
| 17028 | 0.01      | 16.490278 | LCE1E      | 0.000606418 |
| 17029 | 0.01      | 17.315525 | ABCA3      | 0.000577516 |
| 17030 | 0.01      | 18.085051 | ERVMER34-1 | 0.000552943 |
| 17031 | 0.01      | 20.845524 | MDFI       | 0.000479719 |
| 17032 | 0.01      | 20.924419 | MST4       | 0.000477911 |
| 17033 | 0.01      | 20.979715 | LRRC61     | 0.000476651 |
| 17034 | 0.01      | 24.042264 | NTSR1      | 0.000415934 |
| 17035 | 0.01      | 65.28285  | CYBA       | 0.00015318  |
| 17036 | 0.01      | 152.16728 | FABP5      | 6.57171E-05 |
| 16952 | 0.01      | 4.9016171 | AGTR1      | 0.002040143 |
| 16953 | 0.01      | 4.9278202 | TCF15      | 0.002029295 |
| 16954 | 0.01      | 4.950298  | WFDC2      | 0.00202008  |
| 16955 | 0.01      | 5.0828179 | SLAIN1     | 0.001967413 |
| 16956 | 0.01      | 5.1868931 | MNX1       | 0.001927936 |
| 16957 | 0.01      | 5.2391748 | NOVA2      | 0.001908698 |
| 16958 | 0.01      | 5.3382302 | HES7       | 0.00187328  |
| 16959 | 0.01      | 5.3518355 | BEND4      | 0.001868518 |
| 16960 | 0.01      | 5.3746093 | SNORD24    | 0.0018606   |
| 16961 | 0.01      | 5.3746093 | SNORD28    | 0.0018606   |
| 16962 | 0.1501437 | 81.098323 | PRAME      | 0.001851379 |
| 16963 | 0.01      | 5.4542588 | 3-Sep      | 0.00183343  |
| 16964 | 0.01      | 5.4569102 | PRKCQ-AS1  | 0.001832539 |
| 16965 | 0.01      | 5.4588431 | PRKCQ      | 0.00183189  |
| 16966 | 0.01      | 5.4777193 | ANKRD18B   | 0.001825577 |
| 16967 | 0.01      | 5.577035  | GATM       | 0.001793067 |
| 16968 | 0.01      | 5.6077142 | B3GAT1     | 0.001783258 |
| 16969 | 0.01      | 5.621151  | RSPO4      | 0.001778995 |
| 16970 | 0.01      | 5.7296211 | LCE1F      | 0.001745316 |
| 16971 | 0.01      | 5.755547  | SYN2       | 0.001737454 |
| 16972 | 0.01      | 5.8128909 | NOVA1      | 0.001720314 |
| 16973 | 0.01      | 5.9824235 | HID1       | 0.001671563 |
| 16974 | 0.01      | 6.0450615 | SNCB       | 0.001654243 |
| 16975 | 0.01      | 6.078171  | LRFN5      | 0.001645232 |
| 16976 | 0.01      | 6.1505212 | ZDHHC22    | 0.001625878 |
| 16977 | 0.01      | 6.3197653 | EMILIN3    | 0.001582337 |
| 16978 | 0.01      | 6.3983444 | BEX5       | 0.001562904 |
| 16979 | 0.01      | 6.6081261 | SNORA26    | 0.001513288 |
| 16980 | 0.01      | 6.6081261 | MSI1       | 0.001513288 |
| 16981 | 0.01      | 6.6364125 | WT1        | 0.001506838 |
| 16982 | 0.01      | 6.6596234 | ZNF296     | 0.001501586 |
| 16983 | 0.01      | 6.7010793 | CRABP1     | 0.001492297 |
| 16984 | 0.01      | 6.7182616 | CDX2       | 0.00148848  |
| 16985 | 0.01      | 6.8395751 | LRFN1      | 0.001462079 |

|       |           |           |           |             |
|-------|-----------|-----------|-----------|-------------|
| 16986 | 0.01      | 6.8729519 | LHX1      | 0.001454979 |
| 16987 | 0.01      | 6.9696251 | TNFRSF10A | 0.001434797 |
| 16988 | 0.01      | 7.0913401 | FAM189A1  | 0.001410171 |
| 16989 | 0.01      | 7.2482058 | KIF26A    | 0.001379652 |
| 16990 | 0.01      | 7.3686695 | GATA4     | 0.001357097 |
| 16991 | 0.01      | 7.3902436 | EMB       | 0.001353135 |
| 16992 | 0.01      | 7.5131288 | PRR9      | 0.001331003 |
| 16993 | 0.01      | 7.5769867 | SNORA33   | 0.001319786 |
| 16994 | 0.01      | 7.8470541 | PPP2R2C   | 0.001274364 |
| 16995 | 0.01      | 7.8617955 | GPR27     | 0.001271974 |
| 16996 | 0.01      | 7.9538039 | ISM1      | 0.00125726  |
| 16997 | 0.01      | 7.9793894 | SHANK1    | 0.001253229 |
| 16998 | 0.01      | 7.984021  | NKD2      | 0.001252502 |
| 16999 | 0.01      | 8.0106458 | OGDHL     | 0.001248339 |
| 17000 | 0.01      | 8.0974094 | CERS4     | 0.001234963 |
| 17001 | 0.0548131 | 47.603884 | IL10RA    | 0.001151442 |
| 17002 | 0.01      | 8.9430385 | EGFL7     | 0.001118188 |
| 17003 | 0.01      | 8.9442068 | APBB1IP   | 0.001118042 |
| 17004 | 0.01      | 9.2247974 | MATK      | 0.001084035 |
| 17005 | 0.01      | 9.3443446 | CITED1    | 0.001070166 |
| 17006 | 0.1178064 | 110.51521 | CSF3      | 0.001065974 |
| 17007 | 0.01      | 9.4926638 | ADD2      | 0.001053445 |
| 17008 | 0.01      | 9.848283  | NAT8L     | 0.001015405 |
| 17009 | 0.01      | 9.9539327 | SLC17A9   | 0.001004628 |
| 17010 | 0.01      | 10.227184 | PLBD1     | 0.000977786 |
| 17011 | 0.01      | 10.25254  | PRKCZ     | 0.000975368 |
| 17012 | 0.01      | 10.404031 | CA2       | 0.000961166 |
| 17013 | 0.01      | 10.629298 | RAB38     | 0.000940796 |
| 17014 | 0.0468735 | 52.540251 | EPB41L3   | 0.000892144 |
| 17015 | 0.01      | 11.274021 | CYTL1     | 0.000886995 |
| 17016 | 0.01      | 11.401198 | ESX1      | 0.000877101 |
| 17017 | 0.0505211 | 57.654899 | AEBP1     | 0.000876267 |
| 17018 | 0.01      | 12.52066  | TUBB4A    | 0.00079868  |
| 17019 | 0.01      | 13.018451 | GYLTL1B   | 0.000768141 |
| 17020 | 0.01      | 14.031299 | COL9A3    | 0.000712692 |
| 17021 | 0.01      | 14.05952  | DUSP9     | 0.000711262 |
| 17022 | 1.7024467 | 2450.8257 | MMP1      | 0.000694642 |
| 17023 | 0.01      | 14.428231 | MB21D1    | 0.000693086 |
| 17024 | 0.01      | 14.542347 | TMEM88    | 0.000687647 |
| 17025 | 0.01      | 14.744588 | MED12     | 0.000678215 |
| 17026 | 0.01      | 15.196923 | ZFP57     | 0.000658028 |
| 17027 | 0.01      | 15.459905 | KRT75     | 0.000646834 |
| 17028 | 0.01      | 16.490278 | LCE1E     | 0.000606418 |



|       |           |           |            |             |
|-------|-----------|-----------|------------|-------------|
| 17029 | 0.01      | 17.315525 | ABCA3      | 0.000577516 |
| 17030 | 0.01      | 18.085051 | ERVMER34-1 | 0.000552943 |
| 17031 | 0.01      | 20.845524 | MDFI       | 0.000479719 |
| 17032 | 0.01      | 20.924419 | MST4       | 0.000477911 |
| 17033 | 0.01      | 20.979715 | LRRC61     | 0.000476651 |
| 17034 | 0.01      | 24.042264 | NTSR1      | 0.000415934 |
| 17035 | 0.01      | 65.28285  | CYBA       | 0.00015318  |
| 17036 | 0.01      | 152.16728 | FABP5      | 6.57171E-05 |
| 16952 | 0.01      | 4.9016171 | AGTR1      | 0.002040143 |
| 16953 | 0.01      | 4.9278202 | TCF15      | 0.002029295 |
| 16954 | 0.01      | 4.950298  | WFDC2      | 0.00202008  |
| 16955 | 0.01      | 5.0828179 | SLAIN1     | 0.001967413 |
| 16956 | 0.01      | 5.1868931 | MNX1       | 0.001927936 |
| 16957 | 0.01      | 5.2391748 | NOVA2      | 0.001908698 |
| 16958 | 0.01      | 5.3382302 | HES7       | 0.00187328  |
| 16959 | 0.01      | 5.3518355 | BEND4      | 0.001868518 |
| 16960 | 0.01      | 5.3746093 | SNORD24    | 0.0018606   |
| 16961 | 0.01      | 5.3746093 | SNORD28    | 0.0018606   |
| 16962 | 0.1501437 | 81.098323 | PRAME      | 0.001851379 |
| 16963 | 0.01      | 5.4542588 | 3-Sep      | 0.00183343  |
| 16964 | 0.01      | 5.4569102 | PRKCQ-AS1  | 0.001832539 |
| 16965 | 0.01      | 5.4588431 | PRKCQ      | 0.00183189  |
| 16966 | 0.01      | 5.4777193 | ANKRD18B   | 0.001825577 |
| 16967 | 0.01      | 5.577035  | GATM       | 0.001793067 |
| 16968 | 0.01      | 5.6077142 | B3GAT1     | 0.001783258 |
| 16969 | 0.01      | 5.621151  | RSPO4      | 0.001778995 |
| 16970 | 0.01      | 5.7296211 | LCE1F      | 0.001745316 |
| 16971 | 0.01      | 5.755547  | SYN2       | 0.001737454 |
| 16972 | 0.01      | 5.8128909 | NOVA1      | 0.001720314 |
| 16973 | 0.01      | 5.9824235 | HID1       | 0.001671563 |
| 16974 | 0.01      | 6.0450615 | SNCB       | 0.001654243 |
| 16975 | 0.01      | 6.078171  | LRFN5      | 0.001645232 |
| 16976 | 0.01      | 6.1505212 | ZDHHC22    | 0.001625878 |
| 16977 | 0.01      | 6.3197653 | EMILIN3    | 0.001582337 |
| 16978 | 0.01      | 6.3983444 | BEX5       | 0.001562904 |
| 16979 | 0.01      | 6.6081261 | SNORA26    | 0.001513288 |
| 16980 | 0.01      | 6.6081261 | MSI1       | 0.001513288 |
| 16981 | 0.01      | 6.6364125 | WT1        | 0.001506838 |
| 16982 | 0.01      | 6.6596234 | ZNF296     | 0.001501586 |
| 16983 | 0.01      | 6.7010793 | CRABP1     | 0.001492297 |
| 16984 | 0.01      | 6.7182616 | CDX2       | 0.00148848  |
| 16985 | 0.01      | 6.8395751 | LRFN1      | 0.001462079 |
| 16986 | 0.01      | 6.8729519 | LHX1       | 0.001454979 |

|       |           |           |           |             |
|-------|-----------|-----------|-----------|-------------|
| 16987 | 0.01      | 6.9696251 | TNFRSF10A | 0.001434797 |
| 16988 | 0.01      | 7.0913401 | FAM189A1  | 0.001410171 |
| 16989 | 0.01      | 7.2482058 | KIF26A    | 0.001379652 |
| 16990 | 0.01      | 7.3686695 | GATA4     | 0.001357097 |
| 16991 | 0.01      | 7.3902436 | EMB       | 0.001353135 |
| 16992 | 0.01      | 7.5131288 | PRR9      | 0.001331003 |
| 16993 | 0.01      | 7.5769867 | SNORA33   | 0.001319786 |
| 16994 | 0.01      | 7.8470541 | PPP2R2C   | 0.001274364 |
| 16995 | 0.01      | 7.8617955 | GPR27     | 0.001271974 |
| 16996 | 0.01      | 7.9538039 | ISM1      | 0.00125726  |
| 16997 | 0.01      | 7.9793894 | SHANK1    | 0.001253229 |
| 16998 | 0.01      | 7.984021  | NKD2      | 0.001252502 |
| 16999 | 0.01      | 8.0106458 | OGDHL     | 0.001248339 |
| 17000 | 0.01      | 8.0974094 | CERS4     | 0.001234963 |
| 17001 | 0.0548131 | 47.603884 | IL10RA    | 0.001151442 |
| 17002 | 0.01      | 8.9430385 | EGFL7     | 0.001118188 |
| 17003 | 0.01      | 8.9442068 | APBB1IP   | 0.001118042 |
| 17004 | 0.01      | 9.2247974 | MATK      | 0.001084035 |
| 17005 | 0.01      | 9.3443446 | CITED1    | 0.001070166 |
| 17006 | 0.1178064 | 110.51521 | CSF3      | 0.001065974 |
| 17007 | 0.01      | 9.4926638 | ADD2      | 0.001053445 |
| 17008 | 0.01      | 9.848283  | NAT8L     | 0.001015405 |
| 17009 | 0.01      | 9.9539327 | SLC17A9   | 0.001004628 |
| 17010 | 0.01      | 10.227184 | PLBD1     | 0.000977786 |
| 17011 | 0.01      | 10.25254  | PRKCZ     | 0.000975368 |
| 17012 | 0.01      | 10.404031 | CA2       | 0.000961166 |
| 17013 | 0.01      | 10.629298 | RAB38     | 0.000940796 |
| 17014 | 0.0468735 | 52.540251 | EPB41L3   | 0.000892144 |
| 17015 | 0.01      | 11.274021 | CYTL1     | 0.000886995 |
| 17016 | 0.01      | 11.401198 | ESX1      | 0.000877101 |
| 17017 | 0.0505211 | 57.654899 | AEBP1     | 0.000876267 |
| 17018 | 0.01      | 12.52066  | TUBB4A    | 0.00079868  |
| 17019 | 0.01      | 13.018451 | GYLTL1B   | 0.000768141 |
| 17020 | 0.01      | 14.031299 | COL9A3    | 0.000712692 |
| 17021 | 0.01      | 14.05952  | DUSP9     | 0.000711262 |
| 17022 | 1.7024467 | 2450.8257 | MMP1      | 0.000694642 |
| 17023 | 0.01      | 14.428231 | MB21D1    | 0.000693086 |
| 17024 | 0.01      | 14.542347 | TMEM88    | 0.000687647 |
| 17025 | 0.01      | 14.744588 | MED12     | 0.000678215 |
| 17026 | 0.01      | 15.196923 | ZFP57     | 0.000658028 |
| 17027 | 0.01      | 15.459905 | KRT75     | 0.000646834 |
| 17028 | 0.01      | 16.490278 | LCE1E     | 0.000606418 |
| 17029 | 0.01      | 17.315525 | ABCA3     | 0.000577516 |

|       |           |           |            |             |
|-------|-----------|-----------|------------|-------------|
| 17030 | 0.01      | 18.085051 | ERVMER34-1 | 0.000552943 |
| 17031 | 0.01      | 20.845524 | MDFI       | 0.000479719 |
| 17032 | 0.01      | 20.924419 | MST4       | 0.000477911 |
| 17033 | 0.01      | 20.979715 | LRRC61     | 0.000476651 |
| 17034 | 0.01      | 24.042264 | NTSR1      | 0.000415934 |
| 17035 | 0.01      | 65.28285  | CYBA       | 0.00015318  |
| 17036 | 0.01      | 152.16728 | FABP5      | 6.57171E-05 |
| 16952 | 0.01      | 4.9016171 | AGTR1      | 0.002040143 |
| 16953 | 0.01      | 4.9278202 | TCF15      | 0.002029295 |
| 16954 | 0.01      | 4.950298  | WFDC2      | 0.00202008  |
| 16955 | 0.01      | 5.0828179 | SLAIN1     | 0.001967413 |
| 16956 | 0.01      | 5.1868931 | MNX1       | 0.001927936 |
| 16957 | 0.01      | 5.2391748 | NOVA2      | 0.001908698 |
| 16958 | 0.01      | 5.3382302 | HES7       | 0.00187328  |
| 16959 | 0.01      | 5.3518355 | BEND4      | 0.001868518 |
| 16960 | 0.01      | 5.3746093 | SNORD24    | 0.0018606   |
| 16961 | 0.01      | 5.3746093 | SNORD28    | 0.0018606   |
| 16962 | 0.1501437 | 81.098323 | PRAME      | 0.001851379 |
| 16963 | 0.01      | 5.4542588 | 3-Sep      | 0.00183343  |
| 16964 | 0.01      | 5.4569102 | PRKCQ-AS1  | 0.001832539 |
| 16965 | 0.01      | 5.4588431 | PRKCQ      | 0.00183189  |
| 16966 | 0.01      | 5.4777193 | ANKRD18B   | 0.001825577 |
| 16967 | 0.01      | 5.577035  | GATM       | 0.001793067 |
| 16968 | 0.01      | 5.6077142 | B3GAT1     | 0.001783258 |
| 16969 | 0.01      | 5.621151  | RSPO4      | 0.001778995 |
| 16970 | 0.01      | 5.7296211 | LCE1F      | 0.001745316 |
| 16971 | 0.01      | 5.755547  | SYN2       | 0.001737454 |
| 16972 | 0.01      | 5.8128909 | NOVA1      | 0.001720314 |
| 16973 | 0.01      | 5.9824235 | HID1       | 0.001671563 |
| 16974 | 0.01      | 6.0450615 | SNCB       | 0.001654243 |
| 16975 | 0.01      | 6.078171  | LRFN5      | 0.001645232 |
| 16976 | 0.01      | 6.1505212 | ZDHHC22    | 0.001625878 |
| 16977 | 0.01      | 6.3197653 | EMILIN3    | 0.001582337 |
| 16978 | 0.01      | 6.3983444 | BEX5       | 0.001562904 |
| 16979 | 0.01      | 6.6081261 | SNORA26    | 0.001513288 |
| 16980 | 0.01      | 6.6081261 | MSI1       | 0.001513288 |
| 16981 | 0.01      | 6.6364125 | WT1        | 0.001506838 |
| 16982 | 0.01      | 6.6596234 | ZNF296     | 0.001501586 |
| 16983 | 0.01      | 6.7010793 | CRABP1     | 0.001492297 |
| 16984 | 0.01      | 6.7182616 | CDX2       | 0.00148848  |
| 16985 | 0.01      | 6.8395751 | LRFN1      | 0.001462079 |
| 16986 | 0.01      | 6.8729519 | LHX1       | 0.001454979 |
| 16987 | 0.01      | 6.9696251 | TNFRSF10A  | 0.001434797 |

|       |           |           |            |             |
|-------|-----------|-----------|------------|-------------|
| 16988 | 0.01      | 7.0913401 | FAM189A1   | 0.001410171 |
| 16989 | 0.01      | 7.2482058 | KIF26A     | 0.001379652 |
| 16990 | 0.01      | 7.3686695 | GATA4      | 0.001357097 |
| 16991 | 0.01      | 7.3902436 | EMB        | 0.001353135 |
| 16992 | 0.01      | 7.5131288 | PRR9       | 0.001331003 |
| 16993 | 0.01      | 7.5769867 | SNORA33    | 0.001319786 |
| 16994 | 0.01      | 7.8470541 | PPP2R2C    | 0.001274364 |
| 16995 | 0.01      | 7.8617955 | GPR27      | 0.001271974 |
| 16996 | 0.01      | 7.9538039 | ISM1       | 0.00125726  |
| 16997 | 0.01      | 7.9793894 | SHANK1     | 0.001253229 |
| 16998 | 0.01      | 7.984021  | NKD2       | 0.001252502 |
| 16999 | 0.01      | 8.0106458 | OGDHL      | 0.001248339 |
| 17000 | 0.01      | 8.0974094 | CERS4      | 0.001234963 |
| 17001 | 0.0548131 | 47.603884 | IL10RA     | 0.001151442 |
| 17002 | 0.01      | 8.9430385 | EGFL7      | 0.001118188 |
| 17003 | 0.01      | 8.9442068 | APBB1IP    | 0.001118042 |
| 17004 | 0.01      | 9.2247974 | MATK       | 0.001084035 |
| 17005 | 0.01      | 9.3443446 | CITED1     | 0.001070166 |
| 17006 | 0.1178064 | 110.51521 | CSF3       | 0.001065974 |
| 17007 | 0.01      | 9.4926638 | ADD2       | 0.001053445 |
| 17008 | 0.01      | 9.848283  | NAT8L      | 0.001015405 |
| 17009 | 0.01      | 9.9539327 | SLC17A9    | 0.001004628 |
| 17010 | 0.01      | 10.227184 | PLBD1      | 0.000977786 |
| 17011 | 0.01      | 10.25254  | PRKCZ      | 0.000975368 |
| 17012 | 0.01      | 10.404031 | CA2        | 0.000961166 |
| 17013 | 0.01      | 10.629298 | RAB38      | 0.000940796 |
| 17014 | 0.0468735 | 52.540251 | EPB41L3    | 0.000892144 |
| 17015 | 0.01      | 11.274021 | CYTL1      | 0.000886995 |
| 17016 | 0.01      | 11.401198 | ESX1       | 0.000877101 |
| 17017 | 0.0505211 | 57.654899 | AEBP1      | 0.000876267 |
| 17018 | 0.01      | 12.52066  | TUBB4A     | 0.00079868  |
| 17019 | 0.01      | 13.018451 | GYLTL1B    | 0.000768141 |
| 17020 | 0.01      | 14.031299 | COL9A3     | 0.000712692 |
| 17021 | 0.01      | 14.05952  | DUSP9      | 0.000711262 |
| 17022 | 1.7024467 | 2450.8257 | MMP1       | 0.000694642 |
| 17023 | 0.01      | 14.428231 | MB21D1     | 0.000693086 |
| 17024 | 0.01      | 14.542347 | TMEM88     | 0.000687647 |
| 17025 | 0.01      | 14.744588 | MED12      | 0.000678215 |
| 17026 | 0.01      | 15.196923 | ZFP57      | 0.000658028 |
| 17027 | 0.01      | 15.459905 | KRT75      | 0.000646834 |
| 17028 | 0.01      | 16.490278 | LCE1E      | 0.000606418 |
| 17029 | 0.01      | 17.315525 | ABCA3      | 0.000577516 |
| 17030 | 0.01      | 18.085051 | ERVMER34-1 | 0.000552943 |

|       |           |           |           |             |
|-------|-----------|-----------|-----------|-------------|
| 17031 | 0.01      | 20.845524 | MDFI      | 0.000479719 |
| 17032 | 0.01      | 20.924419 | MST4      | 0.000477911 |
| 17033 | 0.01      | 20.979715 | LRRC61    | 0.000476651 |
| 17034 | 0.01      | 24.042264 | NTSR1     | 0.000415934 |
| 17035 | 0.01      | 65.28285  | CYBA      | 0.00015318  |
| 17036 | 0.01      | 152.16728 | FABP5     | 6.57171E-05 |
| 16952 | 0.01      | 4.9016171 | AGTR1     | 0.002040143 |
| 16953 | 0.01      | 4.9278202 | TCF15     | 0.002029295 |
| 16954 | 0.01      | 4.950298  | WFDC2     | 0.00202008  |
| 16955 | 0.01      | 5.0828179 | SLAIN1    | 0.001967413 |
| 16956 | 0.01      | 5.1868931 | MNX1      | 0.001927936 |
| 16957 | 0.01      | 5.2391748 | NOVA2     | 0.001908698 |
| 16958 | 0.01      | 5.3382302 | HES7      | 0.00187328  |
| 16959 | 0.01      | 5.3518355 | BEND4     | 0.001868518 |
| 16960 | 0.01      | 5.3746093 | SNORD24   | 0.0018606   |
| 16961 | 0.01      | 5.3746093 | SNORD28   | 0.0018606   |
| 16962 | 0.1501437 | 81.098323 | PRAME     | 0.001851379 |
| 16963 | 0.01      | 5.4542588 | 3-Sep     | 0.00183343  |
| 16964 | 0.01      | 5.4569102 | PRKCQ-AS1 | 0.001832539 |
| 16965 | 0.01      | 5.4588431 | PRKCQ     | 0.00183189  |
| 16966 | 0.01      | 5.4777193 | ANKRD18B  | 0.001825577 |
| 16967 | 0.01      | 5.577035  | GATM      | 0.001793067 |
| 16968 | 0.01      | 5.6077142 | B3GAT1    | 0.001783258 |
| 16969 | 0.01      | 5.621151  | RSPO4     | 0.001778995 |
| 16970 | 0.01      | 5.7296211 | LCE1F     | 0.001745316 |
| 16971 | 0.01      | 5.755547  | SYN2      | 0.001737454 |
| 16972 | 0.01      | 5.8128909 | NOVA1     | 0.001720314 |
| 16973 | 0.01      | 5.9824235 | HID1      | 0.001671563 |
| 16974 | 0.01      | 6.0450615 | SNCB      | 0.001654243 |
| 16975 | 0.01      | 6.078171  | LRFN5     | 0.001645232 |
| 16976 | 0.01      | 6.1505212 | ZDHHC22   | 0.001625878 |
| 16977 | 0.01      | 6.3197653 | EMILIN3   | 0.001582337 |
| 16978 | 0.01      | 6.3983444 | BEX5      | 0.001562904 |
| 16979 | 0.01      | 6.6081261 | SNORA26   | 0.001513288 |
| 16980 | 0.01      | 6.6081261 | MSI1      | 0.001513288 |
| 16981 | 0.01      | 6.6364125 | WT1       | 0.001506838 |
| 16982 | 0.01      | 6.6596234 | ZNF296    | 0.001501586 |
| 16983 | 0.01      | 6.7010793 | CRABP1    | 0.001492297 |
| 16984 | 0.01      | 6.7182616 | CDX2      | 0.00148848  |
| 16985 | 0.01      | 6.8395751 | LRFN1     | 0.001462079 |
| 16986 | 0.01      | 6.8729519 | LHX1      | 0.001454979 |
| 16987 | 0.01      | 6.9696251 | TNFRSF10A | 0.001434797 |
| 16988 | 0.01      | 7.0913401 | FAM189A1  | 0.001410171 |

|       |           |           |            |             |
|-------|-----------|-----------|------------|-------------|
| 16989 | 0.01      | 7.2482058 | KIF26A     | 0.001379652 |
| 16990 | 0.01      | 7.3686695 | GATA4      | 0.001357097 |
| 16991 | 0.01      | 7.3902436 | EMB        | 0.001353135 |
| 16992 | 0.01      | 7.5131288 | PRR9       | 0.001331003 |
| 16993 | 0.01      | 7.5769867 | SNORA33    | 0.001319786 |
| 16994 | 0.01      | 7.8470541 | PPP2R2C    | 0.001274364 |
| 16995 | 0.01      | 7.8617955 | GPR27      | 0.001271974 |
| 16996 | 0.01      | 7.9538039 | ISM1       | 0.00125726  |
| 16997 | 0.01      | 7.9793894 | SHANK1     | 0.001253229 |
| 16998 | 0.01      | 7.984021  | NKD2       | 0.001252502 |
| 16999 | 0.01      | 8.0106458 | OGDHL      | 0.001248339 |
| 17000 | 0.01      | 8.0974094 | CERS4      | 0.001234963 |
| 17001 | 0.0548131 | 47.603884 | IL10RA     | 0.001151442 |
| 17002 | 0.01      | 8.9430385 | EGFL7      | 0.001118188 |
| 17003 | 0.01      | 8.9442068 | APBB1IP    | 0.001118042 |
| 17004 | 0.01      | 9.2247974 | MATK       | 0.001084035 |
| 17005 | 0.01      | 9.3443446 | CITED1     | 0.001070166 |
| 17006 | 0.1178064 | 110.51521 | CSF3       | 0.001065974 |
| 17007 | 0.01      | 9.4926638 | ADD2       | 0.001053445 |
| 17008 | 0.01      | 9.848283  | NAT8L      | 0.001015405 |
| 17009 | 0.01      | 9.9539327 | SLC17A9    | 0.001004628 |
| 17010 | 0.01      | 10.227184 | PLBD1      | 0.000977786 |
| 17011 | 0.01      | 10.25254  | PRKCZ      | 0.000975368 |
| 17012 | 0.01      | 10.404031 | CA2        | 0.000961166 |
| 17013 | 0.01      | 10.629298 | RAB38      | 0.000940796 |
| 17014 | 0.0468735 | 52.540251 | EPB41L3    | 0.000892144 |
| 17015 | 0.01      | 11.274021 | CYTL1      | 0.000886995 |
| 17016 | 0.01      | 11.401198 | ESX1       | 0.000877101 |
| 17017 | 0.0505211 | 57.654899 | AEBP1      | 0.000876267 |
| 17018 | 0.01      | 12.52066  | TUBB4A     | 0.00079868  |
| 17019 | 0.01      | 13.018451 | GYLTL1B    | 0.000768141 |
| 17020 | 0.01      | 14.031299 | COL9A3     | 0.000712692 |
| 17021 | 0.01      | 14.05952  | DUSP9      | 0.000711262 |
| 17022 | 1.7024467 | 2450.8257 | MMP1       | 0.000694642 |
| 17023 | 0.01      | 14.428231 | MB21D1     | 0.000693086 |
| 17024 | 0.01      | 14.542347 | TMEM88     | 0.000687647 |
| 17025 | 0.01      | 14.744588 | MED12      | 0.000678215 |
| 17026 | 0.01      | 15.196923 | ZFP57      | 0.000658028 |
| 17027 | 0.01      | 15.459905 | KRT75      | 0.000646834 |
| 17028 | 0.01      | 16.490278 | LCE1E      | 0.000606418 |
| 17029 | 0.01      | 17.315525 | ABCA3      | 0.000577516 |
| 17030 | 0.01      | 18.085051 | ERVMER34-1 | 0.000552943 |
| 17031 | 0.01      | 20.845524 | MDFI       | 0.000479719 |

|       |      |           |        |             |
|-------|------|-----------|--------|-------------|
| 17032 | 0.01 | 20.924419 | MST4   | 0.000477911 |
| 17033 | 0.01 | 20.979715 | LRRC61 | 0.000476651 |
| 17034 | 0.01 | 24.042264 | NTSR1  | 0.000415934 |
| 17035 | 0.01 | 65.28285  | CYBA   | 0.00015318  |
| 17036 | 0.01 | 152.16728 | FABP5  | 6.57171E-05 |
